# Supplementary material for: A Novel Subgroup of UCHL1-Related Cancers Is Associated with Genomic Instability and Sensitivity to DNA-Damaging Treatment
Source: Cancers (Basel). 2023 Mar 8;15(6):1655. doi: 10.3390/cancers15061655 (PMC10099714; doi:10.3390/cancers15061655)
Supplement: Supplementary file 1 [file cancers-15-01655-s001.zip]

Archive with 11 entries (11 files):
- Source data Figures.xlsx
- Source data Supplementary Figure.xlsx
- Supplementary Figure  Legends.pdf
- Supplementary Figure S1.tiff
- Supplementary Figure S2.tiff
- Supplementary Figure S3.tiff
- Supplementary Figure S4.tiff
- Supplementary Figure S5.tiff
- Supplementary Figure S6.tiff
- Supplementary Figure S7.tiff
- Supplementary tables.xlsx
