# Supplementary material for: A Novel Subgroup of UCHL1-Related Cancers Is Associated with Genomic Instability and Sensitivity to DNA-Damaging Treatment
Source: Cancers (Basel). 2023 Mar 8;15(6):1655. doi: 10.3390/cancers15061655 (PMC10099714; doi:10.3390/cancers15061655)
Supplement: Supplementary file 1 [file cancers-15-01655-s001.zip › Source data Figures.xlsx]

## Sheet: Source Data Fig. 1B
Source data Fig. 1B: UCHL1 transcript levels and UCHL1 protein staining (H-score) of the GSE117973 cohort.
ID	UCHL1 transcript	UCHL1 protein [H-score]
HNC-1	10.6858	161.29
HNC-2	8.26824	2.524
HNC-3	8.86272	47.7
HNC-4	8.40589	6.152
HNC-6	6.95319	47.93
HNC-7	5.76541	4.14
HNC-9	6.64719	48.43
HNC-10	5.1961	0.6061
HNC-11	6.5325	7.272
HNC-12	11.3436	194.6
HNC-13	8.49205	85.52
HNC-16	5.97968	22.13
HNC-17	5.5462	24.94
HNC-18	7.34345	2.488
HNC-20	9.99037	139.69
HNC-21	5.45475	11.58
HNC-24	9.81393	128.5
HNC-27	6.60402	40.23
HNC-28	5.45674	6.309
HNC-29	4.66411	8.628
HNC-31	10.0321	148.19
HNC-34	4.82966	3.693
HNC-35	9.45675	40.91
HNC-42	6.57779	67.95
HNC-43	10.5081	118.9
HNC-47	7.01244	27.67
HNC-49	9.02974	49.73
HNC-53	7.79079	35.57
HNC-54	9.42698	136.74
HNC-59	10.583	172.37
HNC-60	6.56714	44.74
HNC-63	10.8946	119.44
HNC-64	5.51153	24.64
HNC-67	8.99686	93.74
HNC-68	5.03617	0.2874
HNC-69	5.38825	2.537
HNC-71	5.58675	15.94
HNC-74	7.28212	31.41
HNC-82	6.69468	66.68
HNC-88	5.78324	2.361

## Sheet: Source Data Fig. 1C
Source data Fig. 1C: Clinical annotations and scaled expression values of UCHL1-related gene set in TCGA-HNSC
Patient ID	Cluster	UCHL1	Smoking	Alcohol	HPV16	GJB2|2706	PLK2|10769	ALS2CL|259173	AQP3|360	KRT6B|3854	NIPAL4|348938	KRT14|3861	KRT6C|286887	SPTLC3|55304	TMEM154|201799	GJB6|10804	S100A9|6280	FAM83A|84985	RGS20|8601	SFN|2810	S100A8|6279	KRT6A|3853	SLC6A11|6538	ADGRF4|221393	FAM83A-AS1|100131726	PTK6|5753	KRT16|3868	GSDMC|56169	LYPD5|284348	GBP1|2633	RAET1G|353091	IFNK|56832	CASP14|23581	GPR78|27201	EPSTI1|94240	TENT5B|115572	PDZK1IP1|10158	FABP5|2171	HEPHL1|341208	SLC28A3|64078	SLC39A2|29986	TSPAN10|83882	MAFB|9935	NFE2|4778	APOBEC3A|200315	PLA2G4E|123745	HTR7|3363	ADRB2|154	ARL14|80117
TCGA-4P-AA8J	B1b	high		No		0.618324	0.0692073	0.991554	-0.690574	-0.393617	-0.217522	-0.201562	-0.385945	-0.0232652	-1.18423	0.310321	0.0925287	0.288259	0.74769	-0.615562	-0.17123	-0.340165	0.275355	0.199274	0.526449	-0.230926	-0.259243	-0.0273327	-1.01727	0.0458877	-0.165707	-0.67019	0.398072	0.050265	0.694719	-0.0617324	-0.189676	-0.163151	0.614577	-1.7232	-1.72716	0.419728	-0.0365627	1.11776	-0.286982	-1.80919	0.447371	-0.21346	1.15857
TCGA-BA-4074	B1a	moderate	Yes	Yes	Negative	-0.101748	-0.652474	-1.9307	-1.93257	-1.10159	-0.274429	-0.522071	-1.39209	0.0853033	-0.154431	-0.199697	0.124312	-0.479835	1.15587	-0.65436	0.0698814	-1.1658	0.546354	-0.680019	-0.626416	-0.566556	-1.69992	-0.463443	-0.408852	-0.446957	-0.215181	-0.404249	-0.666985	-1.17708	0.326669	-1.90948	-1.1001	0.139356	0.82379	-0.726854	-1.21972	-0.416734	-2.08702	-0.077214	-1.02588	-1.23493	0.718675	-2.59911	-1.14429
TCGA-BA-4076	A	moderate	Yes	Yes	Negative	1.27958	-0.0306369	0.579131	-0.0893134	0.291864	0.98245	0.0479515	0.0638212	0.292883	0.641012	1.1959	1.01765	0.715189	0.0132319	0.365873	0.933067	0.531981	-0.330949	0.281402	1.11936	0.743933	0.501528	0.192457	0.750585	-1.50204	0.370803	-0.0847772	1.37725	1.22239	-1.50362	0.455642	0.757446	0.564663	0.741713	1.49592	0.85453	0.0957901	-0.854353	0.562588	-1.06407	0.73968	0.874296	0.351551	-0.200938
TCGA-BA-4078	B2b	moderate	Yes	No	Negative	-1.35603	0.00808891	-1.56996	-1.41441	-1.7347	-2.34472	-0.330233	-1.32328	0.336947	-1.3357	-0.352732	-2.58105	-1.6284	-2.50606	-2.77548	-2.68602	-1.07787	-1.96394	-1.88549	-2.10594	-1.97961	-2.61722	-1.46842	-0.0577328	-0.561369	-0.922107	-0.67019	-1.20047	-1.17708	-0.637937	-2.35795	-1.27986	-1.36929	-2.48889	0.123876	-0.793372	-2.06876	0.091364	-0.810467	-1.77669	-1.51547	-0.55426	-0.17801	-1.7272
TCGA-BA-5149	A		Yes	Yes	Negative	0.443343	0.00481281	-0.0987271	0.346926	0.362035	0.938665	0.522138	0.0735634	0.466914	0.497234	0.328392	-0.0496504	0.550878	1.33834	0.754952	-0.0167399	0.294779	0.600107	0.416081	0.164999	0.396406	0.250597	0.26237	0.601721	-0.578089	0.418145	0.143479	0.397376	-0.498015	0.419274	-0.374493	0.0863713	0.405237	0.493812	0.595855	-1.11192	-0.207725	0.395661	0.0783722	0.367787	0.782128	0.893651	0.371578	0.0747954
TCGA-BA-5151	A	low	Yes	Yes	Negative	1.29991	0.786061	1.06277	0.948266	0.835352	1.08301	0.431905	0.811193	1.11118	2.09237	0.941809	0.841214	0.932348	0.941473	0.306435	0.848484	0.720187	1.08985	0.415878	1.30504	0.922946	0.512048	1.41326	1.10549	0.217641	1.3153	0.551193	1.01091	0.170412	0.247358	0.308189	0.767693	-0.0261702	1.2097	1.75711	0.748296	0.0696983	0.694848	1.80378	0.741129	1.99457	1.5214	0.0588011	0.0376898
TCGA-BA-5152	A	high	No	Yes	Negative	0.881784	0.282232	0.393518	1.46165	-0.335423	0.839762	0.500196	0.254414	-0.128716	0.463123	0.578232	0.925782	-0.0379825	0.332592	0.302567	0.821545	0.516892	-0.175145	-1.02386	-1.08645	0.556575	0.507918	0.191592	-0.331048	0.451263	1.52584	-0.023158	-1.42919	-0.45155	0.892391	0.960575	0.728011	0.409105	0.403858	0.0564812	-0.275892	1.17728	0.499312	0.597411	0.324596	0.873911	0.00626262	1.14384	0.180882
TCGA-BA-5153	B2a	high	No	Yes	Positive	-1.62664	-1.4439	-0.224938	-0.12921	-1.20552	-1.38433	-1.69369	-1.11667	-1.65813	-0.87807	-1.9848	-0.632719	-1.48215	-2.44571	-1.39065	-0.566882	-1.06736	-1.91568	-1.1022	-1.80569	-0.70377	-2.03409	-1.86797	-0.187412	-0.691115	-0.910792	-0.67019	-1.27559	-0.873351	-0.861905	-0.91953	-0.54815	-2.11254	-0.364958	0.247705	-1.05949	-1.5504	-1.1003	-1.51242	-1.20551	-0.976659	-1.77362	0.379906	0.844615
TCGA-BA-5555	B1a	moderate	Yes	Yes	Negative	-0.998476	-0.525828	-0.892314	-0.264999	0.0016736	-1.88532	0.055289	-0.240443	-1.14728	-0.390004	-1.29169	-0.0355563	-0.510444	-0.884464	-0.343898	-0.145419	-0.125447	0.430433	-0.481439	-0.386333	-0.00642517	-0.423845	-0.187279	-0.636569	-0.323054	-0.630868	-0.67019	-0.159313	-0.57074	-0.234826	-0.62802	0.589828	-0.310174	-0.117632	0.00315853	0.0663245	0.595026	-0.568469	-0.573721	0.0129083	-0.394592	-1.55496	-0.707668	-0.793546
TCGA-BA-5556	A	low	Yes	Yes	Negative	0.887186	1.18411	0.884078	1.2985	0.730644	0.966119	0.368065	0.831288	1.07545	0.682155	0.669724	0.70754	1.16758	0.595825	0.30214	0.614783	0.784168	1.08951	0.439887	0.910289	0.996218	0.704394	0.82004	0.767684	1.64742	0.595937	-0.433016	1.53262	0.78052	1.71609	1.0853	0.806392	0.668336	0.927758	1.13609	1.0916	0.819405	0.628193	0.776239	0.961023	1.18316	0.989868	0.927064	-0.101865
TCGA-BA-5557	A	moderate	No	Yes	Negative	1.13846	0.50641	-0.71894	0.728023	1.51081	0.933608	0.772876	1.47361	0.411598	0.637603	1.0426	1.07458	1.36643	1.25692	1.11052	0.941122	1.0836	1.33995	0.644939	1.683	0.999386	1.09314	0.724219	2.30799	-0.41746	1.19731	1.55218	0.605594	0.119447	0.289295	1.17425	0.695797	0.984558	1.48246	1.46787	1.09046	-0.0965831	1.79239	1.27913	1.67572	1.37065	0.500163	1.02108	1.08135
TCGA-BA-5558	A	low	No	Yes	Negative	0.868709	1.20664	-0.0175905	1.31528	1.28262	0.901747	0.798618	1.20978	0.264579	0.0365095	0.955637	1.00375	1.47709	1.02551	0.804674	0.806629	0.951245	0.768748	0.358512	0.463337	0.302182	1.07945	0.89542	1.69675	1.11145	0.728416	2.6448	0.586619	1.11765	0.610093	0.866893	0.66427	1.07933	1.46272	1.19217	0.10651	0.487855	0.822739	0.73156	0.516295	1.82874	0.927173	0.367466	0.38737
TCGA-BA-5559	B2a	moderate	No	Yes	Positive	-2.14481	-0.876246	-1.85925	-0.120301	-2.778	-1.03931	-4.83095	-2.45879	-1.54865	-1.4383	-3.90532	-1.81043	-1.95635	-2.34732	-1.91033	-1.8701	-2.99343	-0.802807	-2.16457	-1.39448	-2.53389	-2.82179	-2.94102	0.212664	0.965715	-2.32874	-0.467083	-1.25071	-1.17708	0.42823	-1.7607	-1.5458	-2.0641	-2.03483	0.32473	-2.5641	-1.69562	0.0884826	-0.445307	-1.07245	-1.05394	-0.813139	0.165261	-0.35032
TCGA-BA-6868	B1b	moderate	Yes	Yes	Negative	0.425886	-0.385306	1.16184	-0.0795914	-0.298641	0.984101	0.0161897	-0.241315	0.657156	-0.51196	0.701286	-0.341796	0.960075	0.176038	-0.160086	-0.424525	0.061696	0.567209	-0.15628	0.693122	0.123238	-0.314304	0.31399	-0.051547	-0.142557	0.290378	2.65892	0.811591	-0.286303	0.715571	0.726974	-0.217092	0.418562	0.689724	-0.767293	-0.831047	0.986465	-1.02555	1.1867	-1.02268	0.0472227	0.948141	1.35478	1.0945
TCGA-BA-6869	B1a	high	Yes	Yes	Negative	-0.27682	-1.15026	-0.121774	1.02569	-0.286008	-0.66675	0.0962622	-0.444229	-1.21742	-0.702446	-0.553524	0.140907	-0.0902896	-0.482732	0.433628	0.0925605	-0.242295	-0.927103	0.363333	0.0265787	0.999954	-0.150299	0.477412	-0.0597068	-1.15418	-0.633229	-0.67019	-0.624792	-0.300761	-1.48549	0.558419	0.564827	-0.281693	-0.802616	-0.595256	-0.133258	-0.113035	-1.75159	-0.461828	0.532412	-0.212296	-1.21677	-0.338123	-1.58452
TCGA-BA-6870	A	low	Yes	Yes	Negative	1.64039	0.622094	0.361032	0.730949	0.446109	0.820778	0.816209	0.622137	-1.29067	-0.0739943	1.45388	0.929253	0.871059	1.089	0.769745	0.999676	0.813839	0.961187	1.10544	0.74024	0.418913	0.502676	1.07174	-0.562878	-0.839607	0.829446	1.58997	1.22691	-0.728608	0.0208685	0.988559	0.6275	0.799258	0.749362	0.0274525	0.805623	1.40644	1.74445	1.04991	0.40413	0.313001	0.956071	1.33354	0.158867
TCGA-BA-6871	B2a	moderate	Yes	Yes	Negative	-0.958578	-1.13965	-0.278134	-1.73587	-1.70771	-1.57429	-1.69071	-1.47099	-1.33037	-2.35448	-1.13807	-1.54621	-2.22229	-1.99189	-2.372	-1.52664	-2.58391	-1.26369	-2.62182	-1.79228	-2.97722	-1.66524	-2.0664	-1.58299	-0.217603	-2.32238	-0.67019	-0.959741	-0.957579	0.117925	-2.03067	-1.48467	-1.4355	-1.04754	0.630325	-1.72505	-2.37701	-1.44339	0.46632	-0.956154	-1.13497	-0.0408579	-1.91641	-0.373009
TCGA-BA-6872	A	high	Yes	Yes	Negative	0.866226	0.419703	-0.366957	1.39071	1.07815	0.761923	1.01987	0.903789	0.625242	-0.140052	0.759538	0.98731	0.457572	1.0531	1.02845	0.872675	0.806044	1.05142	0.42151	0.690107	0.309025	0.919809	0.388368	0.870436	-0.378393	0.0866528	1.0632	0.558569	-0.0969687	0.759117	0.85992	0.143834	0.843324	0.306611	0.485416	0.224771	0.729964	0.806234	0.375444	1.3654	0.356978	0.983199	0.75327	0.309387
TCGA-BA-6873	A	moderate	Yes	Yes	Negative	0.509792	0.346156	0.432488	0.508138	0.27553	0.165756	0.569522	0.317477	0.584045	0.460648	0.558895	-0.599101	0.225748	0.582869	0.174637	-0.405001	0.238606	1.30174	-0.613167	0.27998	-0.166643	0.261491	1.0405	-0.256392	1.46585	0.222415	-0.67019	0.922461	-1.17708	1.11953	0.414047	-1.09255	0.125795	0.485372	0.49806	-0.39394	0.389852	0.339311	-0.23072	0.187583	0.403884	1.00411	0.031984	0.0917708
TCGA-BA-7269	B1b	moderate	Yes	Yes	Negative	-0.399323	-0.244423	-1.0209	-0.359476	-0.157874	-0.0783286	-0.373002	-0.302207	-0.286513	-1.96729	-0.00360034	0.423496	0.488878	1.59199	1.16355	0.470033	-0.636893	-0.490174	-0.719275	1.04996	-0.0856081	1.16691	0.73216	-0.606448	-0.820069	0.477416	-0.67019	-0.877712	-1.17708	-0.890012	-0.121421	0.635991	0.756963	-0.952931	-2.52667	-0.65252	0.46932	-0.24968	0.321302	-0.440511	-1.83238	0.701818	-0.151099	1.20167
TCGA-BA-A4IF	B1a	high	Yes	Yes	Negative	0.399836	0.286431	-0.240475	0.364839	-0.0544874	0.333123	0.39201	-0.0489663	0.451182	-0.236496	0.222823	2.14658e-05	-1.11753	-0.352083	-0.296364	-0.048156	0.0735775	0.32244	-0.581067	-1.00209	0.572139	0.323416	0.452747	-0.315953	-0.664205	-0.556239	-0.67019	-0.0171155	0.956871	-0.335463	0.597986	-0.439468	0.192477	-0.929851	-0.215279	1.02965	0.317666	-0.0785549	-0.318344	-1.94326	0.688944	0.422784	-1.83002	-0.775089
TCGA-BA-A4IG	B2a	high	Yes	Yes	Positive	-0.0340602	-0.413439	0.319336	0.413127	0.0213606	-0.75526	0.249278	0.237571	-0.548967	0.024366	-0.257404	0.280793	-0.0059494	-0.134807	0.140682	0.373122	-0.0671505	-0.395125	-0.175132	0.395283	-0.0690711	0.0980067	0.444678	-0.54592	0.405081	0.8055	-0.67019	-1.18616	0.292722	-0.236073	0.459062	0.208064	0.454634	0.123993	0.147975	-0.36643	0.0993259	0.782069	-2.13148	0.198276	0.3562	-1.66336	1.19102	0.876639
TCGA-BA-A4IH	B2b	high	Yes	Yes	Positive	-0.292638	-0.58118	-0.528735	0.189745	-0.18246	-0.354183	-0.420458	0.0813438	0.0676128	-0.416555	-0.440934	0.0215065	-0.782956	-0.738401	-1.05378	0.0179965	-0.536891	0.237572	-0.618475	-1.0443	-0.814016	-0.371143	-0.983154	-0.0833657	0.194228	-0.323975	-0.67019	-0.879741	0.629804	0.327212	0.0493719	-0.379638	-0.496365	-0.107136	-0.00113925	-0.201299	-1.16092	-0.595886	-1.08161	0.611461	0.0782931	-0.834992	0.881381	0.223157
TCGA-BA-A4II	A	moderate	Yes	Yes	Negative	0.55436	0.209847	-0.380693	0.692345	0.470387	0.815146	0.198335	0.319185	0.715808	1.29569	0.644791	0.743158	0.465058	0.832131	0.466648	0.82665	0.227262	0.339284	0.239733	1.00727	0.0531515	0.376591	0.942642	1.23665	-0.239435	1.05513	-0.67019	-0.515453	-0.151995	-1.05276	0.304703	0.680422	1.16926	0.788916	1.25849	0.994741	0.485425	0.707255	-0.356126	-0.1913	0.847136	0.205589	-0.0712168	-0.0322482
TCGA-BA-A6D8	B2b	high	Yes	Yes	Negative	-2.42356	-0.942209	-1.01314	-1.74054	-1.21468	-1.19854	-1.10671	-1.18922	-0.976488	-2.87083	-0.512431	-0.652203	-1.74628	0.45698	0.386846	-0.742364	-1.29595	-1.67004	-2.27073	-1.69742	-1.76617	0.271651	-1.35839	-2.1952	-2.30755	0.91521	-0.67019	-1.42919	-1.17708	-1.81345	-0.998386	-1.37024	-1.12326	-2.0654	-2.94675	-1.82291	-0.152286	-1.52151	0.445195	-1.47762	-1.76525	-1.84648	-1.31718	-2.09007
TCGA-BA-A6DA	A	moderate	Yes	Yes	Negative	0.823868	0.0482011	1.30044	0.649722	1.44823	0.645327	1.29179	0.92705	1.0232	0.385947	1.05822	1.95402	1.89774	1.25693	2.43807	1.90095	0.565474	-0.111553	0.134445	2.25615	1.7151	1.98656	0.892113	1.6563	-0.735483	0.782163	0.511603	0.100595	0.557914	-1.16678	1.29906	1.74392	1.24201	0.529533	0.594913	1.90148	0.194214	0.317382	0.689715	0.129453	-0.454019	1.06771	1.1834	-0.815879
TCGA-BA-A6DB	B1b	moderate	No	Yes	Negative	0.581354	0.451413	0.776425	0.99497	0.780313	0.389962	0.79194	1.0233	1.39181	0.000935052	0.551086	1.06998	0.00591548	0.178765	0.428915	1.23729	0.765567	0.195971	0.934656	0.0405894	0.592771	1.09943	0.982289	0.467974	0.449659	0.639535	-0.67019	0.650893	1.15688	0.890399	1.30627	0.831968	0.635975	0.454925	-0.415661	1.13085	0.569612	0.677117	0.344003	0.413036	0.468664	0.181224	0.499944	1.06498
TCGA-BA-A6DD	A	moderate	Yes	Yes	Negative	0.503382	0.299795	0.519183	0.827359	0.74773	0.463153	0.653969	0.906593	0.337552	0.362589	0.669241	1.19947	0.678059	0.683018	0.650271	1.0523	0.717727	0.633592	0.201032	-0.595981	0.0728414	0.627736	1.13762	1.04474	1.06599	1.11001	-0.0932195	-0.429439	0.470144	0.962502	0.991049	1.05429	0.947119	0.554991	0.403104	0.546909	0.703712	-0.175378	-0.172344	0.594262	0.479855	0.388134	0.352131	0.346064
TCGA-BA-A6DE	B1a	moderate	Yes	Yes	Negative	-0.871913	0.688601	0.560182	0.0338844	-0.534845	-1.54172	0.58831	-0.559037	0.343382	0.257731	-0.663955	0.269533	-0.872006	-0.138323	0.362459	0.316372	-0.336474	0.861659	0.156785	-1.07298	0.50261	0.0691772	0.026134	0.920336	-0.263455	-0.953583	-0.421628	0.674474	-0.0459873	-0.610559	0.50655	0.671385	-0.276719	0.414357	-1.0037	-0.332845	0.120961	0.0166244	-0.983988	-0.276013	0.71839	0.729597	0.217625	-0.414716
TCGA-BA-A6DG	B1b	moderate	Yes	Yes	Negative	0.423493	0.385539	-0.338894	0.957826	0.439931	0.219843	0.217182	0.245973	0.810982	-0.212777	0.466827	0.272435	0.171383	0.869538	0.4226	0.438644	0.167998	0.714326	0.661224	0.875908	0.250259	0.50204	0.210408	1.18893	-0.716377	0.885677	1.71139	0.69522	1.2718	-0.437616	-0.108454	-0.286952	0.596652	0.71246	0.424209	1.05	0.385383	0.956751	1.84508	0.0445498	0.174299	-0.0392682	0.159542	0.653871
TCGA-BA-A6DI	B1b	moderate	Yes	Yes	Negative	-0.0632219	0.834607	1.27534	1.59955	0.653707	0.43026	0.619322	0.485579	1.01948	0.0888912	0.554464	0.689942	0.785572	0.605531	0.544948	0.792297	0.500123	0.796797	1.2243	0.815176	0.658135	0.629315	1.28413	0.0752884	-0.104209	0.512863	0.0955814	0.846553	0.607943	-0.227265	0.76826	0.46167	0.637334	1.16777	0.429695	1.29279	0.519203	-0.0443758	-0.0468954	0.121103	-0.128166	0.255259	0.982153	1.5293
TCGA-BA-A6DJ	A	low	Yes	Yes	Negative	0.736366	0.66559	1.48	0.278752	0.581164	0.454958	0.546252	0.567469	0.275656	1.20306	0.720039	0.890744	0.716117	0.777223	0.769091	0.937639	0.52941	-0.073473	-0.125293	1.2242	0.251275	0.222144	1.10069	1.39299	1.01416	1.04844	2.36457	1.25419	0.111763	1.04179	0.0901175	0.962741	-0.160753	1.17058	0.778193	0.785866	0.578792	1.0122	0.41502	2.19264	1.2035	0.346433	1.3942	-0.299428
TCGA-BA-A6DL	B1a	high	Yes	Yes	Negative	0.216145	-1.28332	0.495013	0.894629	0.152304	-0.278912	0.309985	0.167492	-0.148787	0.710668	-0.25999	0.297488	-0.327188	0.347582	0.270709	0.317012	0.574353	-0.186854	0.0126382	0.0522988	1.20266	0.426524	0.903853	-0.473538	-0.778777	0.370265	-0.67019	-1.42919	1.29699	0.188128	0.0216298	0.10053	0.0790304	-0.116764	-0.659056	0.369931	-0.189649	-1.56888	-0.396665	1.64706	0.275269	-0.951341	-1.14353	-0.167304
TCGA-BA-A8YP	B2b	moderate	Yes	Yes		-1.16809	-1.99127	-2.06132	-1.06914	-0.849995	-1.90402	-0.718118	-0.74398	-1.22017	-1.01279	-0.857743	-3.02618	-1.40894	-1.96581	-1.74472	-2.81563	-0.44354	-1.75159	-2.26949	-1.72628	-2.09751	-0.920248	-0.718347	-0.765842	-1.07906	-0.493681	-0.67019	-1.29322	-1.17708	-0.829763	-1.553	-3.55401	-1.62188	-1.40314	-1.24809	-1.6036	-1.47191	0.481397	-1.59336	-1.28455	-1.11665	-1.47959	-1.73447	-2.09007
TCGA-BB-4217	B1b	moderate	Yes	Yes	Negative	0.305139	-0.292126	-0.426135	0.237386	-0.0614291	-0.0558614	-0.10905	-0.369909	-0.322066	0.454825	0.334801	-0.105672	0.425557	0.833108	0.0740087	-0.164272	-0.151079	0.516093	0.689913	-0.0825467	0.202973	-0.089402	0.547206	-0.201046	-1.08109	-0.473284	0.0833647	-0.465355	-0.3392	-0.571111	-0.345731	-0.803081	-0.485881	-0.0392167	-1.02687	0.215668	-1.18035	-1.05867	-0.68147	0.255419	-0.137503	0.457396	-0.0246617	0.494984
TCGA-BB-4223	B2a	moderate	No	No	Positive	-1.92058	-1.39739	-0.540034	-0.203182	-1.48595	-1.33443	-2.51705	-1.12779	-1.73164	-1.68024	-1.78179	-1.54005	-1.42434	-2.45786	-1.65441	-1.70718	-0.870133	-0.924139	-1.76811	-0.95066	-1.10968	-0.899301	-1.3898	-0.405149	0.0178375	-1.64468	-0.67019	-0.989304	-1.17708	-0.363856	-2.26908	-1.70884	-0.890941	-2.41007	0.563392	-1.32303	-1.2871	-1.21706	-0.669247	-0.702443	-1.63554	-2.28856	-0.0195716	0.475334
TCGA-BB-4224	A	low	No	Yes	Negative	0.364793	0.151846	0.845505	0.71487	-0.561934	0.363483	0.141753	-0.676499	1.02672	0.206104	0.807219	0.0210755	-0.367874	0.618387	0.587595	0.87989	-0.874164	0.572573	0.996373	0.4495	-1.47509	0.850079	1.06229	0.0582269	0.219341	0.848211	-0.362525	1.3618	1.31698	-0.304758	0.205215	0.215048	1.54903	-0.243471	0.848241	1.40886	0.657687	-0.813965	-0.29949	0.212164	0.420373	-0.0725784	0.467979	1.031
TCGA-BB-4225	B2a	moderate	Yes	Yes	Negative	-1.49127	-1.96165	-1.25272	-0.948416	-2.16012	-0.585878	-1.61285	-1.85437	-2.39156	-1.50508	-2.27073	-1.68831	-3.14976	-1.57879	-1.09099	-1.16596	-1.73811	0.0529918	-2.54713	-2.25925	-1.60919	-1.28897	-3.10449	-0.344315	-0.331084	-2.25552	-0.420185	-0.972094	-1.17708	0.342597	-0.728847	-1.40607	-1.8574	-1.32354	0.460199	-1.82612	0.0380868	-1.70256	-1.66033	0.214545	-1.09118	-1.47021	-1.53275	0.552452
TCGA-BB-4227	A	moderate	Yes	Yes		-0.0519007	-0.809308	0.792222	0.416632	0.0685282	-0.242782	0.103502	-0.196354	0.0703489	-0.322619	0.118261	1.05907	1.07298	0.856915	-0.652754	0.800065	0.448223	0.623214	0.952271	1.18796	0.533072	0.402931	-0.288946	-1.12683	-1.07259	1.60274	0.45444	-0.167596	0.893335	-2.01848	0.0735905	0.386149	0.196914	0.167642	-0.690046	-0.18572	1.07253	-1.41438	-0.273273	-0.241333	-0.962378	0.681978	0.920528	0.342635
TCGA-BB-4228	B2a	moderate	Yes	Yes	Positive	-1.12633	-0.208191	-1.30706	-0.470624	-1.34834	-0.49949	-3.22328	-1.13864	-2.003	-1.25009	-1.45235	-1.08727	-1.29345	-0.848794	-0.53571	-1.24195	-0.919253	-1.96132	-1.33233	-1.50842	-0.497031	-1.09401	-2.2406	-0.57896	-0.913015	-2.09134	-0.400196	-1.42919	-0.48372	-0.882613	-1.73364	-1.05731	-3.19447	-1.51533	0.714464	-1.14002	-1.46355	-1.91539	-1.04431	-0.0695568	-0.549405	-1.60933	0.551129	0.730741
TCGA-BB-7861	B2a		Yes	No	Positive	-0.72549	-0.412702	-1.56558	-1.20275	-1.41541	-0.922055	-1.28371	-1.2224	-1.90839	-0.702584	-1.55354	-0.318847	-1.8723	-1.95352	-1.21875	-0.202475	-1.11311	-1.82935	-1.63896	-2.00719	-2.09493	-1.39265	-2.07263	-0.246734	1.88134	-2.22225	-0.67019	-1.42919	-1.17708	0.807073	-2.19075	-0.560272	-2.163	-0.447825	0.462176	-2.20714	-1.35285	-0.329336	-1.71887	0.385652	0.0500151	-1.11563	-0.202191	-0.600017
TCGA-BB-7862	B2b		Yes	Yes	Negative	-0.788808	-1.47793	-1.98754	-2.17891	-0.195139	-0.324503	-1.77983	-0.504162	-2.24925	-0.097761	-0.55242	-0.14969	-0.764412	-1.24054	-1.17089	-0.118617	-0.0408298	-2.27518	-1.59924	-1.4121	-1.19941	-0.668013	-1.09734	-1.24283	-1.28489	0.069114	-0.67019	-1.42919	-1.17708	-1.30558	-1.42617	-0.412608	-1.56464	0.0154876	0.336913	-1.59532	-1.57093	-0.693764	-1.78966	-0.258269	0.278779	0.245993	-1.31763	-1.74265
TCGA-BB-7863	A		No	Yes	Negative	1.67239	1.79933	1.48579	1.08971	1.54136	-1.8341	1.0252	1.60719	1.04142	1.71876	1.26427	1.29432	0.935122	1.3831	1.43757	1.3287	1.29802	1.16849	0.693093	1.23953	1.6694	1.25262	0.594125	1.59821	-0.504986	0.960778	-0.0217199	1.84126	1.76727	-2.44872	0.789249	1.13805	1.42399	1.06909	1.09879	0.372637	1.45385	1.72652	2.06905	-0.0127563	1.68536	1.41074	0.760433	1.00116
TCGA-BB-7864	B1a		Yes	Yes	Negative	-1.17683	-0.0781515	-1.13613	-1.83343	0.200079	-0.234091	0.423423	0.111966	-1.37469	0.593827	-1.47119	-0.953671	0.138003	-0.240963	-0.0336766	-0.808487	0.505943	-0.40594	-0.447867	-0.438013	0.260335	0.138691	1.01831	0.352559	-1.05421	0.466436	-0.67019	-0.706386	-0.930752	-2.02619	-0.273961	-0.949396	-1.0779	-0.357473	0.0553073	-0.126061	-1.00213	0.29092	-1.64791	-0.926539	0.265359	-1.47198	0.699054	-1.43143
TCGA-BB-7866	B2a		Yes	No	Positive	-1.44543	-1.88486	-0.428149	0.247856	-1.35583	-0.226488	-2.38437	-1.30159	-2.02927	0.314005	-2.36509	0.295157	-0.782813	-2.14242	-0.9233	0.322803	-1.11068	-2.10218	-0.493519	-0.492241	-0.582717	-2.15349	-0.524722	-0.427903	-0.779794	-0.902468	-0.212632	-1.42919	0.68141	-0.495361	-0.972235	0.337893	-1.91287	-0.611654	1.18358	-0.72462	-1.34939	-0.832218	-0.887554	0.942235	-0.803415	-0.943578	-0.780087	-0.826126
TCGA-BB-7870	B1a		Yes	Yes	Negative	0.248946	-2.63046	-0.275351	0.237802	-1.39888	-1.47743	-0.0133312	-1.63135	-1.95963	-1.19396	0.0167225	0.0946232	-0.58053	-0.50037	0.321534	-0.0984842	-0.679404	-2.27518	-0.755795	0.255123	0.170261	-0.880031	0.122648	-1.19378	-0.626698	-0.589733	-0.67019	-1.01092	-1.17708	-1.92	-1.41021	-0.432213	-1.4226	-1.29243	-1.59388	-0.326097	-1.58444	-2.41649	-0.52644	0.713483	-1.20479	-0.0280644	-2.98096	-1.42648
TCGA-BB-7871	B2b		Yes	Yes	Negative	-1.18267	-1.53199	-1.18761	-2.81757	-0.650985	-0.998635	-1.32451	-0.874072	-0.894346	-0.655456	-0.892146	-2.35424	-1.91237	-0.901094	-1.30178	-1.31377	-0.29731	-1.36106	-0.461345	-1.01068	-0.104056	-0.503626	-0.590781	-1.1429	-0.641431	-0.792756	-0.67019	-1.42919	-1.17708	-0.843107	-0.894139	-0.872	-1.07727	-1.69045	-0.842503	-0.546478	0.763479	0.0166997	-0.724533	-0.908481	-2.09974	-0.856716	-2.1685	-0.072661
TCGA-BB-7872	A		No	Yes	Negative	0.852459	2.17311	-0.208684	-0.425125	0.77853	0.511695	0.579907	0.771187	0.84387	0.936345	1.46188	-0.108823	-0.0798075	0.398564	0.143225	0.152509	0.658362	1.03837	1.07106	-0.362213	-0.796966	0.691334	1.13279	-1.2574	2.40326	1.03311	0.851609	0.335437	0.381475	1.89839	0.757682	0.197515	1.00939	0.410758	0.379888	-0.972825	0.624383	1.47567	0.716846	0.21794	-0.172363	0.978412	1.71716	1.45777
TCGA-BB-8596	B1b	high	Yes	Yes	Negative	-0.227585	-0.193892	-0.538148	-0.654112	-0.65267	-0.275025	-0.31274	-1.17231	-0.255363	-0.429229	0.0680697	-0.127094	0.0935382	-0.274771	-0.399059	0.146249	-0.955522	0.945542	0.00886867	-0.117274	-0.163327	-0.793144	-1.3387	-0.372662	-0.411739	-0.623703	-0.67019	-0.792508	-0.161606	-0.786412	-1.27767	-0.0920685	-0.535517	-0.598101	0.355652	-0.310877	-0.197303	-0.0512148	-0.161975	-0.408967	-0.241741	-0.0808319	-1.11769	-0.709367
TCGA-BB-8601	B2b	high	Yes	Yes	Negative	-0.525385	-1.41054	-0.15768	-2.79701	0.0882425	-0.574449	-0.501221	-0.213001	-2.36412	0.753718	0.282976	0.0929552	-0.815451	0.574836	-0.0589941	0.21672	0.17583	-1.58407	-0.036693	-0.118557	-0.897748	-0.457732	0.426044	-1.69915	-3.93328	0.659022	-0.67019	-1.42919	-1.17708	-3.92063	-2.50564	-0.230271	-0.000316238	-0.0695684	-0.444802	0.47373	-0.516908	-0.377826	-0.681951	-0.510813	0.253152	0.682594	-0.409214	-1.77561
TCGA-BB-A5HU	A	moderate	No	Yes	Negative	1.10972	-0.819356	0.0935934	-0.0174384	0.295271	0.737148	-0.111123	-0.0312229	0.173409	0.0685978	0.769969	0.777744	1.20325	1.32695	0.236893	0.557273	0.124019	1.02418	-0.287437	1.71386	0.788906	-0.105244	0.793142	-0.416286	-0.140247	-0.18782	0.0106418	1.15177	1.57548	-0.544101	-0.396459	-0.0743116	0.885488	0.514486	1.21739	-0.698896	0.649761	-0.27326	1.07862	0.626868	0.57079	0.657716	-1.27302	0.388257
TCGA-BB-A5HY	B1b	moderate	Yes	Yes	Negative	-0.378743	-1.39901	-0.00450043	-1.61848	-1.34868	0.327876	-0.905024	-1.19557	0.100752	-0.71955	-1.04785	-0.234672	0.454148	1.32858	-1.04109	-0.57346	-0.823561	0.364792	-0.413797	0.99115	-0.609101	-2.13138	-1.3956	-2.58019	-0.797433	-0.281767	-0.67019	-0.330299	-1.17708	-0.822879	-0.28942	-1.14078	-0.999184	0.464547	-0.536369	-1.37847	0.0198553	-3.1629	0.650374	-3.15242	-1.35019	-0.0905142	0.303952	-0.161464
TCGA-BB-A5HZ	B1a	high	No	Yes	Negative	0.72659	0.539829	0.930577	1.41533	0.488952	-1.68433	0.152706	0.373704	1.06972	-0.453268	0.17619	0.620778	0.424866	0.917441	1.29426	0.760573	0.483533	-1.0541	0.494335	0.993613	0.901948	0.639097	1.71897	1.86574	-1.05543	-0.73002	-0.67019	1.63574	2.23679	0.149275	0.852479	0.452418	1.27804	-0.350213	0.751754	0.345576	-0.583213	-2.83142	0.712217	-0.104359	1.59677	0.470049	-3.10722	-0.741418
TCGA-BB-A6UM	B2a	moderate	Yes	No	Positive	-0.166779	-1.88535	0.588564	-0.245836	-1.22839	-1.05703	-2.17359	-0.95497	-0.160392	0.189847	0.183437	0.961622	-0.303436	-1.17971	-0.431746	0.845491	-0.64755	-1.97666	-0.0299933	-0.231958	-0.0479107	-1.44397	-0.576817	0.557232	1.19873	0.598737	-0.67019	-1.42919	0.49826	0.750619	-1.41493	0.504183	-0.852498	-1.67796	0.384676	-2.03566	-0.101933	-1.1897	-2.1648	1.7658	-1.14358	-2.26698	-1.22029	-1.43129
TCGA-BB-A6UO	A	moderate	Yes	No	Negative	1.17961	0.641248	0.343507	0.88613	0.8191	0.943103	0.995429	0.695441	0.277109	0.812193	1.00589	0.967404	1.09953	1.01822	1.42225	1.04686	0.911138	0.86736	0.397411	1.79067	0.774485	0.701405	1.33792	-0.0706661	0.401375	1.11307	1.01278	0.742952	1.40082	1.24922	0.233798	0.735488	1.32783	0.651002	0.539573	0.351139	1.63128	-0.443915	1.30756	0.278078	0.557185	0.577437	0.69207	1.04918
TCGA-C9-A47Z	A	low	No	No	Negative	1.27744	0.436526	1.20443	0.309992	1.56479	0.821092	1.05223	1.61499	0.947149	1.00756	1.29362	0.740139	0.561062	1.2621	1.31363	0.841782	1.26035	1.21357	1.196	1.11541	1.01605	1.36224	1.54475	1.38468	0.626523	0.314539	0.724594	1.19433	1.49736	0.585517	1.235	0.694582	1.40785	1.4412	1.19601	1.31683	1.05127	1.71626	1.29907	1.52471	1.44965	0.773249	0.332744	1.72224
TCGA-C9-A480	A	low	No	No	Negative	1.25422	1.89318	2.4092	1.45995	1.35768	0.794679	1.06704	1.61568	1.35694	0.799155	0.720913	0.517531	0.615565	1.00487	1.38423	0.623261	1.05302	0.846523	1.35142	1.77393	1.16269	1.08316	1.7932	0.665676	0.939338	1.1067	-0.340175	0.73517	2.24873	1.30024	1.50978	0.689584	1.11229	0.846144	1.43826	1.21759	0.913431	1.16285	1.63804	0.191504	1.52226	1.12534	0.97528	2.13987
TCGA-CN-4722	A	low	Yes	No	Negative	1.51731	1.24907	1.21276	1.06538	1.66615	1.01909	1.03747	1.80353	1.48077	1.87692	1.15997	1.12175	0.241919	0.948863	0.931312	0.994725	1.56498	0.927845	0.690378	0.158497	1.84463	1.46614	0.640238	2.17576	-1.65093	0.346475	-0.67019	1.46929	1.80575	-1.93956	0.954923	0.701014	1.26436	0.436494	0.950028	1.40023	0.148321	1.0001	0.163753	-0.343486	1.56824	1.08942	-0.0112142	0.312843
TCGA-CN-4723	B1b	moderate	Yes	Yes	Negative	0.203447	0.0445553	1.30434	-0.474488	-0.436628	0.0659168	-0.0679806	-0.367704	0.0762207	0.211773	0.270331	-0.523818	-0.222958	0.236358	-0.324979	-0.605084	-0.141236	0.372765	-0.0989238	0.111355	-0.0294975	-0.551513	-0.394281	-1.94734	0.237826	0.307752	-0.204894	0.538032	-0.046624	-0.213459	0.0167087	-0.386465	0.354747	0.647243	0.0510199	0.0980999	-0.232582	-0.599489	0.0666175	-0.0681782	0.0317923	1.01092	0.403441	0.595837
TCGA-CN-4725	B1b	moderate	No	No	Negative	1.05048	0.106349	0.406682	0.0671683	1.07056	0.617504	0.769705	1.29242	-0.160496	0.628049	1.02762	0.36844	0.453454	0.162002	0.419772	0.523817	0.750103	1.03659	0.651333	-0.0663916	0.885359	0.774822	0.235281	0.681347	-0.793416	1.05659	0.856797	0.588179	0.121932	-1.1086	0.498025	0.215326	-0.115693	1.1181	0.597624	0.221221	1.11968	1.8076	0.645917	-0.14923	0.768302	0.82967	0.655919	0.341523
TCGA-CN-4726	A	moderate	Yes	Yes	Negative	1.9899	1.16258	-0.906138	2.12754	1.49126	1.25648	0.895551	1.27177	1.48604	1.58474	1.66038	1.50553	0.387764	1.19501	1.76019	1.32561	0.866295	1.24971	1.42727	0.471322	0.811482	1.26327	1.38108	1.76843	-0.951406	1.01272	1.18314	1.24123	-0.383597	-0.209713	0.907195	0.427574	1.69295	0.840796	1.7128	1.19904	-0.810227	1.21018	0.483902	0.0865227	1.19988	1.20703	0.794478	1.17266
TCGA-CN-4727	B1a	high	Yes	Yes	Negative	-1.33972	-0.730429	-0.970331	-2.20908	-1.31163	-3.24045	-0.448265	-1.08086	-3.0885	0.813331	-3.78735	-1.61195	-0.746067	0.227788	0.0574093	-1.86469	-0.731257	-2.27518	0.236288	-0.426875	0.560635	-1.61928	-0.465351	-0.36398	-1.26316	-0.387006	-0.67019	-1.27316	-1.17708	-2.26907	-1.05155	-1.17959	-1.31667	-1.93866	-2.04514	-1.97806	-0.960433	-3.22106	0.0308014	-1.77909	-2.26594	-2.39738	-2.3779	-1.66515
TCGA-CN-4728	B1b	moderate	Yes	Yes	Negative	-0.176962	0.0322875	-1.94277	-0.804832	-0.136703	0.419053	-0.584584	-0.473169	-0.268971	-0.153589	-0.0417626	-0.93741	-1.38705	-0.745684	-1.20625	-0.795504	-0.0164581	-1.92276	-0.421212	-1.46655	-0.948815	-0.297885	-0.524674	-0.698464	-0.226752	-0.672097	-0.139641	-0.0587532	-0.880126	-0.0139746	-1.3636	-1.0817	-0.398776	-0.215857	0.863394	-0.142491	-1.00863	0.363126	-0.493088	0.263926	-0.231548	0.71286	-1.05209	-0.907815
TCGA-CN-4729	B1b	low	Yes	Yes	Negative	0.262513	0.430107	0.24443	0.599859	0.78668	0.575592	0.451818	0.892161	0.425417	1.2729	0.0562207	0.781954	0.186613	0.284031	0.439452	0.680022	0.994077	0.664018	0.546712	0.332817	0.205258	0.362555	-0.273543	1.45491	-0.347309	1.69344	-0.140536	0.980079	-1.17708	-0.7578	0.285055	1.20319	0.309213	1.12426	0.947536	0.00987271	-0.0703859	0.238114	0.431058	0.594706	1.70842	0.142705	0.553298	1.01913
TCGA-CN-4730	B1a	high	Yes	Yes	Negative	-0.0915397	-1.25305	0.217502	-0.302007	-0.134356	0.336192	0.250726	-0.198515	-0.31936	-0.110522	-0.095954	-0.634477	-0.70717	0.340043	0.229152	-0.610785	0.0266932	0.758467	0.351754	-0.631679	0.960524	-0.00697147	-1.8554	0.182887	-1.24151	0.0368853	-0.67019	-0.0705025	-1.17708	-1.96735	0.333296	-0.67666	-0.850568	0.0921327	-0.628722	0.0994341	1.07354	-0.198898	-0.867324	-1.35641	0.18007	-0.829399	-0.319246	-0.46241
TCGA-CN-4731	B1a	high	Yes	Yes	Negative	0.601632	0.645781	-0.788214	-0.0237693	-0.866159	-0.255527	0.162495	-0.739956	-0.184111	0.19088	0.643826	-0.0981103	0.548869	-0.183724	-0.934587	-0.215659	-0.126138	0.355671	-0.197992	0.641633	1.29351	-0.474602	0.117457	-0.405781	-0.999997	-0.578661	-0.359677	-0.218416	0.183864	-0.672687	0.165369	0.660765	-1.08658	0.155803	-0.797702	-0.0568705	-0.324511	-0.929106	-0.793485	-0.286504	-0.650796	0.111809	-0.229862	-1.11164
TCGA-CN-4733	B1b	moderate	No	No	Negative	-0.568693	0.876164	-1.0058	0.243807	-0.0940295	0.0435128	0.241932	0.173106	0.836548	-0.373209	-0.295358	0.00985993	-0.126031	0.107355	-0.342436	-0.167986	-0.137843	0.213655	0.192433	-0.877915	-0.738067	-0.0317651	-0.53292	-0.387196	1.44111	0.71928	-0.67019	0.457111	-0.46145	0.982541	0.353931	0.731597	-0.402779	0.848122	0.285008	0.131563	0.597184	0.326504	1.18164	-0.373779	-0.192697	0.49249	0.835913	0.0405007
TCGA-CN-4734	A	low	Yes	Yes	Negative	1.13724	1.37897	0.937696	1.14202	1.53024	1.16595	1.1144	1.64098	0.655938	0.963339	0.744312	0.736473	0.857786	0.954043	1.22872	0.754273	1.38979	1.10817	0.9268	1.2416	1.11795	1.01105	0.78119	1.19368	1.65523	0.302428	0.0400626	0.982906	1.49412	0.866492	0.85261	0.917509	0.893907	1.0104	1.39298	1.26767	1.71357	1.22448	1.06899	1.6275	1.40434	1.12478	0.509965	1.12433
TCGA-CN-4735	B2b	high	Yes	Yes	Negative	-0.638078	-1.09699	-1.60908	-1.23461	-2.00607	-0.757566	-1.16541	-1.6296	-0.397533	-1.27835	-0.230837	-1.29327	-3.15062	-1.35624	-2.21951	-1.63607	-1.55541	-0.58345	-3.25926	-2.38133	-2.90377	-1.64538	-3.10551	-0.296314	0.0664325	-1.79984	-0.67019	-0.358901	-0.426418	0.629471	-0.649843	-1.24482	-1.79729	-1.49005	0.858561	-1.69997	-1.03336	-0.592041	-0.936922	-0.887041	-1.3015	0.449741	0.597382	0.419795
TCGA-CN-4736	B1b	moderate	Yes	Yes	Negative	0.0706022	0.937628	-0.444575	0.684911	0.526458	0.610014	0.512239	0.40555	1.12437	0.230926	0.330311	-0.287262	0.391103	0.261857	0.389542	-0.396706	0.493863	0.453597	0.910657	-0.184845	0.284009	0.660407	-0.105823	0.141959	1.39049	0.576114	0.124053	1.24955	1.07301	1.43398	0.534187	0.347115	0.449226	0.1892	0.651158	0.858339	-0.19677	0.671233	0.197309	0.331551	0.451542	0.754455	-0.01908	0.970485
TCGA-CN-4737	B1b	moderate	No	No	Negative	0.198274	0.174788	1.11378	-0.460723	0.583084	0.220566	0.597795	0.641912	1.07492	0.0366466	0.611976	-0.334139	0.528233	-0.171831	-0.0379586	-0.532555	0.731156	1.00986	0.988894	0.354435	0.908654	1.00162	0.487146	0.757899	-1.48316	0.0411968	-0.365777	0.816648	2.86747	-0.308385	0.665663	0.00498393	0.634235	0.110996	0.505052	1.02904	1.28075	0.450072	0.0766575	-1.55603	0.604122	0.761128	0.381033	0.959933
TCGA-CN-4738	B1b	low	Yes	Yes	Negative	0.181174	0.724022	0.886471	1.16776	0.321715	0.831172	0.465348	0.314985	0.94338	0.302502	0.0423682	0.363924	0.922366	0.223379	0.15286	0.0885924	0.711423	1.0891	0.575511	0.970528	0.760678	0.173499	0.913551	-0.864788	0.369189	0.129002	0.095709	1.63866	0.397966	0.366054	0.358292	0.808618	0.112117	0.802237	0.611435	-0.243378	-0.343339	0.522328	0.617681	0.931902	0.646164	0.609995	0.647428	0.777838
TCGA-CN-4739	B1a	low	Yes	Yes	Negative	-0.309408	-0.593322	0.605681	0.49059	-0.270256	-1.63314	-0.916092	-0.203957	-1.12849	0.329649	-0.485099	0.799203	0.625852	-0.573959	-1.41719	0.676378	-0.105964	-0.203918	0.952418	0.606458	0.862502	-0.603027	-0.515398	-0.635714	-0.462023	-0.00297893	-0.67019	-1.21562	-0.278895	-1.24599	0.159738	0.795712	-0.941355	-0.532933	0.34439	-0.514778	0.384709	0.812049	1.22524	1.01332	-0.485667	-1.91454	0.161219	-0.578887
TCGA-CN-4740	B1b	moderate	Yes	Yes	Negative	0.186114	-0.652085	-0.777378	0.633449	0.165345	0.711093	0.100237	0.276884	0.319522	0.869219	0.10949	0.384774	0.214526	-0.223727	-1.18557	0.422435	0.324364	0.495944	-0.023855	-0.378932	0.320781	0.481265	0.266044	0.23844	0.101203	0.192544	-0.67019	0.0746088	0.13721	0.10961	0.519726	0.25962	0.779819	-0.225638	0.778842	0.659794	0.849763	1.01767	0.335904	-0.327033	1.22619	0.646774	0.059049	0.547059
TCGA-CN-4741	B2a	moderate	Yes	No	Positive	0.447391	0.637429	1.41077	1.12327	0.0680847	0.461078	-0.0307014	0.422265	0.556385	0.602362	0.535263	0.824468	0.355923	-1.20121	-0.169977	0.904074	0.471287	0.434007	0.273297	-0.0281498	-0.0894624	0.549685	0.421095	-0.145314	0.214235	1.34485	-0.0953136	0.0985299	-0.0947151	-0.550789	0.706867	1.11005	0.735556	0.720001	1.15317	0.574991	-0.291157	0.693667	-1.46414	0.418325	0.878289	-0.851929	0.919447	-1.02071
TCGA-CN-4742	B1b	moderate	Yes	Yes	Negative	1.45294	-0.300056	0.246724	0.170267	0.805806	0.940484	0.260542	0.685794	1.70056	0.763186	0.979099	1.03619	0.799755	1.01658	0.634377	0.809919	0.557901	0.786391	0.880063	0.257632	1.096	0.774945	-0.0308011	1.90202	-0.0461513	0.520496	0.16169	0.986712	0.690425	0.679086	0.456773	0.730104	0.546025	1.12558	0.576146	0.937185	0.38559	0.99003	0.740149	0.835205	1.45675	0.492887	-0.508189	1.52708
TCGA-CN-5355	B1b	moderate	Yes	Yes	Negative	0.554931	0.626059	0.0710375	0.236276	0.540263	0.283816	0.358622	0.424333	1.12678	1.44593	0.909493	-0.279689	0.594571	0.580233	-0.249179	-0.141232	0.410251	0.581762	0.664198	0.20635	-0.544242	0.226147	1.14357	0.649808	-1.18471	0.442569	0.488633	1.37717	-0.881694	-1.5489	0.287063	-0.35771	0.0297529	1.24046	0.953337	-0.0265721	-0.539662	0.332796	0.0441707	-0.375815	1.29349	0.974408	1.02343	-0.254786
TCGA-CN-5356	B1a	moderate	Yes	No	Negative	-0.0146156	0.151391	0.212947	-0.286376	0.333485	-0.795326	0.382745	0.206084	-0.097137	1.01705	0.0760557	-0.270232	0.356448	-0.398418	-0.621506	-0.298846	0.673681	0.215224	0.554728	0.486165	1.05843	0.0197158	0.566321	-0.260318	-1.27682	-1.03253	-0.67019	-0.182379	0.714164	-1.63433	-0.749773	-0.0110483	0.0869872	0.255761	0.349435	-0.805928	-0.438501	-0.841015	0.2109	-0.631613	1.32726	0.281689	0.00161429	-0.983838
TCGA-CN-5358	B1b	moderate	Yes	Yes	Negative	0.559015	0.743094	0.255639	1.00969	0.552618	0.616369	0.259078	0.452014	0.928357	0.972863	0.584852	0.530452	-0.0885665	-0.259119	-0.00491935	0.366441	0.275381	0.294247	0.262716	-0.161308	0.0748243	0.361529	-0.271784	0.904691	0.454327	0.136422	-0.167838	0.00131658	-1.17708	0.381827	0.230777	0.339252	-0.0092092	0.81413	0.228863	0.492371	-0.585713	0.537888	1.03284	-0.105312	1.39812	0.551522	0.627799	-0.105664
TCGA-CN-5359	B1b	high	Yes	Yes	Negative	0.669348	0.147294	-0.0195577	0.0677063	-0.179156	0.705352	-0.254733	-0.163687	0.516605	-0.0952	0.621466	0.361937	0.267971	0.247694	-0.0409463	0.377266	-0.204622	0.710416	0.135982	0.52005	-1.09128	-0.0211553	-0.604979	0.0770956	0.17811	-0.526561	-0.67019	0.612087	0.271934	0.156515	-0.825422	0.799441	0.241709	0.360415	0.927232	0.333578	-0.017122	0.34183	0.707341	0.274474	0.540136	-0.534772	-0.401379	0.743674
TCGA-CN-5360	B2b	high	Yes	Yes	Negative	-0.388004	-1.34221	-0.0920414	-0.454189	-0.171395	-0.400025	-0.639597	-0.281343	-0.00593895	-0.0891558	-0.281194	-0.626583	-0.787748	-1.82215	-1.3485	-0.685577	-0.309126	-1.25434	-0.323778	-1.35608	-0.48232	-0.346042	-0.962746	-0.0986377	0.428861	-0.741057	-0.67019	-0.586702	-0.689163	-0.000342274	-0.42693	-0.677326	-1.28356	-0.115893	0.516998	0.636947	-0.684624	0.146579	0.176632	0.486688	0.335472	-0.132675	-1.04098	-1.36604
TCGA-CN-5361	B1b	moderate	Yes	Yes	Negative	0.668215	-0.995398	-0.391449	-1.84258	-0.798066	0.55396	0.352546	-0.700933	0.282017	0.406415	0.610756	-0.137972	-1.65346	-0.373754	-0.48071	-0.638151	-0.463544	0.600293	1.69453	-2.17579	0.264115	0.0285708	-1.14886	-0.260059	0.0827464	-0.000215983	0.478179	-0.51958	-1.17708	0.0584393	0.288701	0.795246	-0.0982613	-1.16006	0.320397	-0.126897	-0.75873	0.451792	-0.61369	-1.74684	-0.681544	1.56338	-1.08374	0.898967
TCGA-CN-5363	A	moderate	Yes	Yes	Negative	-0.909774	0.00997477	-2.02144	-0.125396	-0.683714	0.0804952	0.317201	-0.344367	0.829503	-1.3033	-1.11745	-1.03343	-0.840346	0.640064	-0.751354	-1.21037	-0.0886334	0.557468	0.0764491	-1.11759	-1.33781	-0.856339	0.513701	-0.201384	1.55054	0.854571	4.39511	1.45693	-1.17708	0.973028	0.638541	-0.721985	-0.864624	0.970352	-1.05037	-0.862962	-0.623806	0.844859	-0.0723057	-1.584	-1.08455	-0.0473094	0.440869	-0.401668
TCGA-CN-5364	A	moderate	Yes	Yes	Negative	0.74928	-0.1798	-1.08201	0.336075	0.0681686	0.652407	-0.082522	0.244425	-1.20832	0.323414	0.400632	0.634103	0.513543	-0.612102	-0.272756	0.608385	-0.130866	-0.178792	0.97459	0.352368	-0.475881	-0.440234	0.308916	-1.05086	-0.167506	0.734912	-0.410397	-1.00865	-0.345528	0.361168	-0.560045	0.52497	1.11036	-0.499978	0.245254	-0.244613	-0.0246874	0.0363948	-1.77915	1.31133	-0.804873	-0.780717	0.0950372	0.184797
TCGA-CN-5365	A	low	Yes	Yes	Negative	1.25604	1.64411	0.705409	0.50203	1.50482	1.13768	1.1572	1.28898	0.874157	0.815183	1.22284	0.773333	0.913032	0.166909	1.42104	0.965063	1.42209	1.29122	1.02004	1.30132	0.674508	1.15841	1.41208	0.705438	0.677677	1.57571	1.7422	1.00254	-0.171599	0.288966	1.08153	1.02182	1.28366	0.549063	0.953537	-0.0772152	0.404727	1.20478	0.148012	-0.141254	0.379572	1.38538	1.15926	1.44486
TCGA-CN-5366	B1b	moderate	Yes	Yes	Negative	0.805622	0.594754	0.231445	0.15988	0.706765	0.0525528	0.666713	0.77057	1.01389	1.09599	-0.378357	-0.495452	0.296111	0.683367	0.32989	-0.249669	0.599497	1.04016	1.23381	0.147853	0.722046	0.52528	1.07551	-0.251598	0.549921	0.148605	-0.0789468	-0.59645	-0.233927	-0.654678	0.336422	0.114744	0.284559	-0.280045	0.480943	0.233277	0.464143	0.306052	-0.689593	0.0679093	0.514328	0.702199	-0.10781	1.39107
TCGA-CN-5367	B1b	moderate	Yes	Yes	Negative	-0.257522	0.0184262	-0.899139	0.0435262	0.658865	0.835844	0.506446	0.414958	0.162105	-0.635635	-0.0360299	-0.551715	0.396997	-0.0506656	0.149167	-0.404154	0.620557	0.614979	0.534565	-0.171018	-0.73424	0.290578	0.735729	-0.739249	-0.0780567	1.04529	2.69159	1.03476	-1.17708	0.755981	1.0227	0.247684	0.544637	-0.00181228	-0.0678484	0.0682246	0.402985	0.678715	0.535137	-1.22693	-0.581638	0.107338	0.763235	0.688544
TCGA-CN-5369	B1b	low	Yes	No	Negative	1.26326	0.329505	0.744219	1.19919	0.919823	0.840081	0.624625	1.00647	0.583964	1.1497	0.991541	0.822952	0.0972749	0.360495	0.579202	0.763341	0.773968	0.915698	0.762788	-0.495523	0.486846	0.497848	0.360836	1.07934	1.72725	0.870797	-0.174165	0.762715	0.626337	1.24986	0.552716	0.379542	0.3027	0.785947	0.879473	0.430889	0.264914	0.553425	1.09891	1.91264	1.36851	0.873759	0.613048	0.176449
TCGA-CN-5370	B1b	high	Yes	Yes	Negative	0.254056	1.12877	-0.589429	0.594293	-0.0560137	0.782195	0.146793	-0.0652701	0.728773	0.21615	0.1861	0.153601	0.235768	0.209739	-0.184263	0.16621	-0.17345	0.568875	-0.110888	0.235762	-0.621481	0.102861	-0.312562	-0.757766	1.22248	1.21116	0.757342	1.24575	0.363597	1.49397	-0.12371	0.181709	0.16898	0.709834	0.625789	0.547507	-0.483159	0.544593	0.64541	0.342623	0.804325	1.09739	-0.386075	-0.225765
TCGA-CN-5373	B1b	moderate	Yes	Yes	Negative	1.31783	1.29286	0.55249	0.386055	1.69401	0.912548	1.03646	1.66964	1.37948	1.28624	1.18793	0.869995	0.882431	0.600741	1.0548	0.830386	1.54281	0.926146	1.00921	0.61811	0.902725	1.45293	0.801173	0.419558	1.0896	0.688097	-0.35097	1.94776	1.81027	1.65688	1.67669	0.709593	1.32516	1.15861	1.77937	1.30224	1.40578	1.24102	0.772968	1.087	1.11651	0.84224	0.3108	1.53393
TCGA-CN-5374	B2a	low	Yes		Positive	-1.54394	-0.0196438	1.45552	0.444926	-1.05094	-0.45062	-1.31328	-1.00837	-0.0470333	-0.532082	-2.24984	0.057438	-1.03916	-2.30882	-0.11825	0.269693	-0.653909	0.0244105	0.169379	-0.396644	0.149312	-0.0903215	-0.0994014	0.00674717	0.0534335	1.25	-0.67019	-0.72209	-0.322162	-0.805532	-0.649657	0.550278	0.518725	-1.40507	0.345836	0.911066	0.346413	-0.109979	-1.4888	-0.62769	-1.08879	-2.04804	1.73597	-0.107253
TCGA-CN-6010	B2b	moderate	Yes	Yes	Negative	-1.75513	-1.08344	-0.850833	-0.38814	-0.411106	-0.912372	-1.62717	-0.509643	-0.471802	-0.189931	-0.871352	-1.33679	-1.35854	-0.328984	-0.470566	-1.30474	-0.38376	-1.57198	-1.6976	-1.58025	-0.837405	-1.2661	-0.281625	-1.35807	-1.48746	-1.86075	-0.407376	-1.42919	-1.17708	-1.57442	-1.21037	-1.02921	-0.929621	-1.04152	-0.241352	-1.82354	-1.8965	-0.682044	-0.680544	-0.837051	-0.63219	-1.06606	-0.957385	-1.88654
TCGA-CN-6011	A	moderate	Yes	Yes	Negative	0.412005	0.494796	0.555669	0.646887	0.831693	0.799502	0.413163	0.776715	-0.00476466	0.365688	0.170498	-0.12206	-0.0869929	-0.344903	0.380597	-0.100121	0.533119	0.879551	0.534627	-0.351922	-0.27398	0.714255	0.417902	1.10834	0.717868	0.19471	1.54921	1.33154	0.31772	0.910693	1.04227	-0.403549	0.659911	0.125451	0.272838	0.17593	0.624967	0.64908	1.51478	0.303443	0.459349	0.622565	0.76217	0.626063
TCGA-CN-6012	B2b	moderate	Yes	No	Negative	-0.499097	-1.06483	-0.482629	0.257	-0.0292454	-0.10801	-1.35156	-0.176834	-0.874682	0.31122	0.0264753	-0.0218994	0.166238	-0.547338	-1.31299	-0.220293	0.0693299	-1.70049	-0.304594	-0.0686375	0.106481	-0.157465	-0.193585	-0.430677	-0.0924772	-0.385629	-0.354785	-1.07794	-1.17708	-0.632901	-1.13204	0.179026	-0.698336	-0.317757	0.14529	0.948018	-1.62332	0.257689	-0.31113	-0.183066	0.259353	-0.920116	-0.635453	-1.84581
TCGA-CN-6013	A	moderate	No	Yes	Negative	0.0222759	0.175932	1.00143	0.394696	0.0074102	0.538924	0.477341	0.0910903	0.65452	-0.28562	0.533297	0.302436	0.638965	0.267675	0.18058	0.358889	0.432469	-0.646898	0.778364	0.398898	0.929915	0.537414	0.323576	0.371756	1.49447	0.0296106	0.730461	0.313564	1.42956	1.65148	0.438118	1.04409	1.04841	-0.562803	1.01951	0.21241	1.01136	-0.449856	0.283516	0.921154	0.850208	0.645392	0.339152	0.733678
TCGA-CN-6016	B1b	moderate	Yes	Yes	Negative	0.709783	0.0137303	-0.556198	0.229319	0.620857	0.560561	0.513508	0.170998	0.109805	-0.0612388	0.798537	-0.717259	0.363494	-1.19366	-0.189636	-0.740721	0.334182	0.518971	0.899115	0.0396576	-0.401549	0.934982	-0.749417	-0.250651	-0.0254402	-0.522903	0.37084	0.962052	0.840272	0.886666	0.658953	-0.32242	1.3005	-0.891125	0.439506	0.389594	0.00539441	0.848959	-0.276214	0.134584	-0.851043	0.573084	-0.244571	0.211196
TCGA-CN-6017	B1b	high	Yes	Yes	Negative	-0.424649	0.614443	-1.12277	0.394606	-0.393896	0.166252	-0.0285107	-0.432985	0.358976	-0.46465	-0.189046	-0.747216	0.527671	0.0246225	-0.550721	-0.894826	-0.343934	0.00141397	-0.156671	-0.186279	-0.466698	-0.330302	-0.444889	-0.487278	1.62258	-0.544699	-0.298626	0.667876	-0.818453	1.0855	-0.278606	0.233447	-0.0802925	0.41635	0.0950897	-0.105778	-0.348528	-0.0821572	0.2788	0.508032	-0.142978	-0.0391513	0.341889	0.47012
TCGA-CN-6018	B1b	moderate	No	No	Negative	0.229552	1.8566	-0.457393	-1.25731	0.0132886	-0.161913	0.512945	0.281036	0.720872	-0.0443253	0.329279	-1.45021	0.310896	-0.0169217	0.13685	-1.57977	0.569206	0.880743	-0.597084	0.750736	-1.08186	0.223378	-0.191584	-0.728895	1.20803	0.0425473	0.899179	1.43509	-1.17708	1.18265	0.0850169	-1.40805	0.111273	0.990702	0.12497	-0.952369	-0.025241	0.0845329	1.22889	-0.164206	-0.750833	0.272368	0.779789	0.965457
TCGA-CN-6019	B2b	high	Yes	Yes	Negative	-0.314326	-1.00801	-0.369007	-0.656182	-0.074294	-0.459082	-0.794876	-0.00904612	-0.326237	0.452569	-0.0836174	-0.461116	-1.42033	-0.610053	-1.00011	-0.431068	-0.163838	-1.00816	0.212569	-1.06576	-0.0990962	-0.208727	-0.912775	-0.521582	-0.584308	-0.994104	-0.67019	-1.26243	-1.17708	-0.0252354	-0.204769	-1.10939	-0.303293	-0.0638415	0.307112	-0.0698735	-1.34123	0.346552	-0.646134	-0.137506	0.332409	-1.26136	-0.824975	-1.37929
TCGA-CN-6020	A	moderate	Yes	Yes	Negative	0.533054	0.155674	0.0349904	0.569871	0.223494	0.706481	0.120647	0.124538	0.0676128	0.707796	0.434194	1.08998	1.08417	0.341942	0.375954	0.872182	0.445674	0.702936	0.566159	0.658145	0.205525	0.193209	0.504399	0.200319	0.134941	-0.413364	-0.156938	1.43088	1.46803	-0.0550003	0.160917	0.791462	0.779258	0.756163	0.723718	0.761115	0.25492	0.501519	0.664463	1.3831	0.739015	0.67975	0.702236	0.484046
TCGA-CN-6021	B2b	high	Yes	No	Negative	-0.421128	-0.382301	-1.91437	-0.241125	0.782113	0.0260163	-0.494262	0.615559	-0.968003	1.24136	0.139107	0.520306	-1.35836	-1.38313	-0.408107	0.528981	0.730987	-0.573321	0.436251	-1.90332	-0.0910543	0.65663	-0.384919	-0.344032	-1.50598	0.910473	-0.67019	-1.27561	-1.17708	-2.2254	-0.825921	-0.522568	-0.486514	0.0562274	-0.545868	0.906472	-0.208945	0.441834	0.607267	-1.01131	0.681563	-1.2098	-1.21935	-2.09007
TCGA-CN-6022	B1b	high	Yes		Negative	-0.332485	-0.148756	-0.854566	-1.08628	-1.02284	0.625232	-0.905742	-1.30951	0.174419	-0.663291	-1.3456	-0.697844	0.266935	0.046736	-0.651139	-1.00693	-1.20219	-1.19824	-1.32742	0.0255649	0.42238	-1.62865	-2.19842	-0.260515	-1.02787	-0.412819	-0.67019	0.962054	0.212542	-0.503317	-2.12739	-0.232167	-0.278075	-0.279526	-0.447818	-1.42337	-1.22451	0.0106066	-0.230587	-1.84567	0.40165	0.123324	-1.65293	-1.16369
TCGA-CN-6023	B2b	high	Yes	Yes	Negative	-3.01202	-1.58391	-1.18744	-2.7796	-1.21759	-2.56867	-3.35326	-0.921632	-1.91283	-1.23416	-2.16829	-2.1126	-3.00995	-0.968069	-1.44087	-2.37339	-0.650237	-1.44559	-3.41201	-2.6499	-1.73746	-1.84546	-0.448822	-2.2123	-0.30557	-2.83536	-0.67019	-1.42919	-1.17708	-0.670833	-2.95844	-2.77737	-2.26489	-2.52856	-1.67677	-2.99308	-1.00006	-0.854379	-1.23844	-1.79331	-0.940676	-0.958485	-1.88173	-1.96114
TCGA-CN-6024	B2b	high	Yes	Yes	Negative	0.00712177	0.239714	-1.50638	-0.974719	0.328607	0.493646	0.219578	-0.0217267	-1.59153	-0.267406	0.672833	-0.653394	0.247445	-0.0736657	-0.0566122	-0.302703	0.141114	-1.72963	-0.361327	0.475416	-2.16124	0.345434	0.148236	-0.607692	-1.45608	-0.201147	-0.376008	0.570477	-1.17708	-2.03026	-0.664007	-0.783095	0.80729	-0.0388346	0.827617	0.401178	-0.41376	-0.453695	0.241253	0.138762	0.0474486	-0.242754	-0.167263	-0.982129
TCGA-CN-6988	B1a	high	Yes	Yes	Negative	-0.0960881	-1.65745	0.977227	-1.16165	-0.834744	-3.69929	-0.302695	-0.518325	-1.85118	0.62258	0.05993	0.0795751	0.220379	-0.382608	-0.582004	-0.628267	-0.0748357	-2.0088	1.12981	0.351143	1.19643	-0.432084	0.528753	-0.870612	-1.07757	0.214467	-0.67019	-1.16276	1.0561	-1.72803	-0.173906	0.37411	-0.681716	0.121677	-1.12822	0.425476	1.43254	-2.59654	-1.12445	1.77894	-0.71958	-2.68004	-3.40497	-0.829949
TCGA-CN-6989	B2b	high	Yes	Yes	Negative	-0.249447	-0.705952	-1.94425	-2.02004	-0.25793	-0.363803	-0.357585	-0.333913	-0.643582	-0.658107	-0.338237	-1.62774	-0.295853	-0.194684	-1.01868	-1.48673	-0.0928056	-0.0933499	-0.744377	-0.132785	-2.29428	-0.539585	-0.276573	-1.27434	-0.742553	-0.962483	-0.67019	-1.31803	-0.957281	-0.423072	-2.0534	-1.0107	-1.28141	0.256195	0.701267	-0.451304	-2.14297	0.11048	-0.721924	0.0820372	-0.288606	-0.204751	-0.567119	-0.655074
TCGA-CN-6992	B2b	high	Yes	Yes	Negative	-0.392183	-1.6635	-0.477242	-1.09665	-0.641993	-0.693538	-0.898554	-0.49285	-1.29574	0.357186	0.316539	-1.53197	-1.68966	-1.68345	-2.0954	-1.58171	-0.181491	-0.581664	-1.41185	-1.44421	0.0984464	-0.886853	-0.426535	-2.47916	-1.80784	0.260461	-0.67019	-1.24694	-1.17708	-1.11201	-1.78861	-2.02662	-1.52364	-1.07705	-0.764992	-0.193219	-0.752204	0.368405	-1.07149	-1.22697	0.278826	0.606988	-1.11564	-2.09007
TCGA-CN-6994	B1b	high	Yes		Negative	0.505858	0.323431	0.0281129	0.16206	0.290914	0.651689	0.458648	0.175062	0.583076	-0.150979	0.621463	-0.440289	0.99566	-0.428304	-0.0664048	-0.551114	0.543086	0.157953	0.378397	0.323736	0.812477	0.904796	0.444066	0.456669	-0.350855	-0.638042	-0.329467	1.74821	1.30483	-0.684845	-0.105599	0.309674	0.650564	-0.0242597	0.742363	0.982327	1.02244	-0.5904	1.27692	-0.404867	0.375675	1.2927	-1.34519	0.111648
TCGA-CN-6995	A	low	Yes	No	Negative	0.776856	-1.21696	-1.2817	-0.623054	-0.0164962	1.21527	0.229752	-0.380105	-0.583415	0.238044	0.628655	0.45114	0.389726	0.865263	-0.0490553	0.134828	0.226615	-0.0467258	-0.702973	0.0434292	1.00596	0.0994148	-0.188922	0.790709	0.862396	0.463033	-0.0110681	-1.29113	-0.701763	0.791609	-1.05659	0.616857	0.132723	0.0370874	0.305245	1.25296	-0.378133	-0.714477	0.128625	0.431019	0.419784	1.29106	-2.35766	-0.19546
TCGA-CN-6996	B1b	moderate	No	No	Negative	0.718964	0.884471	0.302221	0.732475	0.331002	0.641672	0.43427	0.323079	0.76473	1.18228	0.913054	-0.188838	0.10834	0.546685	0.0805136	-0.183991	0.242753	0.921019	0.334295	-0.776918	-0.233573	0.284572	-0.213971	0.879942	1.71272	0.191055	-0.246717	0.698632	-0.250888	1.65344	0.375777	0.667903	-0.150479	0.956005	0.795801	0.445347	0.452822	0.79586	0.169218	0.752959	0.939878	1.05066	0.194879	0.156552
TCGA-CN-6997	B2b	high	Yes	No	Negative	-1.12984	-0.805045	-0.173701	-0.642556	-0.84971	-1.15598	-0.775022	-0.687615	-1.23295	-1.01036	-0.471703	-2.83884	0.152521	-0.659995	-0.924788	-2.70901	-0.369068	-2.13942	-2.35819	-0.596312	-0.884345	-1.18249	-2.80095	-1.81658	-1.69082	-1.61364	-0.67019	-0.837765	-0.979816	-0.733953	-1.9221	-2.19218	-1.75198	-1.02844	-1.75004	-1.35015	-2.19706	-0.983179	-1.56716	-1.8691	-1.15702	-1.6362	-0.115555	-0.704013
TCGA-CN-6998	A	low	Yes	No	Negative	1.35299	0.666175	0.436543	0.847906	1.16279	1.38423	0.876088	0.979218	0.757344	0.213183	1.28676	1.09362	1.7572	1.52686	2.03756	1.17657	0.597644	1.10102	0.437415	2.48389	1.09111	1.12817	0.674149	1.9686	1.32374	0.661656	1.94876	0.401999	1.80178	0.939567	1.21624	1.07667	1.50592	1.08078	1.85885	0.79489	1.3849	1.60014	0.618549	0.719072	1.17378	0.795942	0.942666	0.507033
TCGA-CN-A497	B1a	high	Yes	No	Negative	-2.11795	-2.67787	-0.946302	-0.556251	-1.69844	-3.11995	-1.14688	-1.55622	-2.11226	-3.14973	-3.00053	-2.73891	-1.33178	-0.909395	-1.49663	-2.6652	-1.45061	-2.05796	-1.41798	-0.96627	0.491953	-1.36814	-0.0714174	-0.858678	-1.08863	-1.83225	-0.67019	-0.881298	-0.861449	-1.11567	-1.35066	-2.1206	-3.33915	-1.51763	-1.55449	-1.62981	-1.4243	-2.5661	-0.527433	-0.714668	-0.641791	-1.17867	-2.64819	-1.14666
TCGA-CN-A498	B1b	moderate	Yes	No	Negative	0.682602	1.11626	0.352251	-0.878338	0.826142	0.252271	0.782005	0.77092	-0.0284481	0.175966	0.794087	0.761758	0.260613	0.132966	0.0438691	0.728186	0.753444	1.12551	0.630725	0.25524	-0.0494759	0.630412	0.672373	0.0465536	0.109076	0.0189132	-0.67019	-1.16295	-1.17708	-0.446549	0.93891	0.858197	0.261203	0.499742	0.809371	0.212024	1.32328	0.492639	-0.139909	1.03148	0.521798	0.904373	1.06057	1.11398
TCGA-CN-A499	A	high	No	Yes	Positive	-0.606331	0.424098	-0.0380635	0.153761	0.35753	0.0826747	0.362083	0.221689	0.226082	0.628703	-0.141174	-0.158822	-0.475794	0.145064	-0.296606	-0.0683118	0.395213	-0.104009	-0.472414	-1.07202	-0.16341	0.0333455	0.649888	0.653388	1.91962	-0.0326659	-0.383207	-1.10366	0.2944	1.22998	-0.379417	-0.0313222	0.0919167	0.278758	1.12298	-0.0571996	-0.737253	-0.390005	-0.60159	0.355977	0.335584	-1.08329	0.430306	-0.111298
TCGA-CN-A49A	B2b	low	No	Yes	Negative	0.444544	0.21268	-0.320334	-0.742188	-0.477694	0.0463994	-0.361786	-0.231242	0.600381	-0.812682	0.858656	-0.263409	0.333801	-0.7375	-0.696563	-0.162416	-0.923244	0.370654	-0.0326884	0.913587	-0.677678	-0.20635	-0.368944	-0.538223	-0.216963	-0.490884	-0.3599	1.1875	0.993825	-0.63903	0.398317	-0.303303	0.397984	-0.697879	-1.04735	-0.537726	0.022096	0.244354	-0.132761	-0.704051	-0.0723638	-1.04421	-1.15765	0.484386
TCGA-CN-A49B	A	low	Yes	Yes	Negative	-0.231992	0.910639	-0.78663	0.973881	-0.0319072	0.24899	0.358345	-0.110164	-0.616741	-0.219547	-0.450452	0.182124	0.0486987	0.590375	0.0235686	0.0978507	0.324382	-0.336265	0.178528	-0.352026	-0.546042	-0.111548	0.329225	0.0250187	0.437122	0.262765	0.0350604	-1.42919	-0.880234	1.18127	-0.0114921	1.11537	-0.0623242	-0.167392	-0.327796	0.0822553	0.148271	-0.419449	0.337534	1.32437	-0.741631	0.0993236	0.562779	-0.520673
TCGA-CN-A49C	B2a	high	Yes	No	Positive	-0.282902	-0.611814	0.591023	-0.134026	-0.442059	0.115995	-0.230987	-0.304853	-1.19662	0.515286	-0.269438	1.16769	-0.0120284	-0.658487	0.034718	1.26516	0.100952	-1.10027	0.451689	-0.139904	-0.798022	-0.280921	0.305284	-0.0466241	-0.551869	1.15135	-0.364037	-1.01611	0.286954	-0.523923	0.469271	1.27112	0.392934	0.0437706	0.11354	-0.125269	0.68775	0.545001	-0.588842	0.222185	-0.326724	0.122695	0.553187	-1.68095
TCGA-CN-A63T	B1a	high	Yes	Yes	Negative	-1.01124	-0.990245	-0.384185	0.29171	-0.0727998	-0.456056	-0.113395	-0.208419	-0.644774	-0.556084	-1.20345	-0.132014	0.568687	0.945055	0.145916	-0.0775748	0.0843516	-1.18548	-0.523298	1.09002	0.423472	0.148051	0.776435	0.713042	0.27259	-0.341513	0.0394133	-0.366999	1.16978	0.448596	-0.154882	0.128696	0.00414908	-0.170538	0.0717181	-0.642225	0.0576121	-0.569204	-0.0777376	1.4435	0.414174	-1.14849	-1.27155	-1.54054
TCGA-CN-A63U	B1a	high	Yes	No	Negative	-3.90757	-3.47389	-3.6025	0.708437	-1.359	-4.30486	0.0717975	-1.26942	-2.44112	-1.82101	-3.54227	-3.15701	-1.28196	-0.696237	-1.02554	-2.83251	-0.762012	-2.27518	-2.53627	-1.18025	-0.57526	-0.667315	-0.386396	-1.90215	-0.954356	-2.52535	-0.373963	-0.793064	-1.17708	-0.565076	0.0450019	-2.22183	-3.69999	-1.98151	-1.19779	-1.45924	-1.41567	-3.72552	-0.775832	-1.6371	-1.78283	-2.01634	-3.24545	-2.09007
TCGA-CN-A63V	B1b	moderate	Yes	No		1.40347	1.02727	1.23905	-2.37669	-0.0137321	0.516414	0.385317	-0.297281	0.595759	0.143035	0.959879	0.77879	0.834279	0.71058	0.19608	0.625123	0.268058	-0.516411	0.670973	1.32027	1.24654	-0.0746607	0.532683	0.891483	-1.17331	-0.147055	-0.67019	1.50109	0.6004	-0.736693	-0.908593	1.19593	0.680315	0.132859	0.384884	-0.375404	-0.824837	-0.854131	1.59192	-1.71544	-0.0569997	0.769143	0.495354	1.13482
TCGA-CN-A63W	B1a	high	Yes	Yes	Negative	0.0220448	-0.983777	0.747549	-0.952842	-0.212106	-0.740826	0.526011	-0.429374	-1.34525	-0.372187	-0.0648436	0.160664	0.63718	0.682048	0.492154	0.303832	-0.100878	0.707105	-0.1786	1.06722	1.44661	0.368993	0.415352	0.113253	-0.485735	-1.1801	-0.180138	0.82293	0.630383	0.0415215	0.216926	0.61104	0.750393	0.723952	0.0523642	-0.287398	0.664379	-1.01595	-0.350651	0.788939	0.405241	-0.611809	0.377751	-0.606418
TCGA-CN-A641	B1a	high	Yes	Yes	Negative	0.645933	-1.51649	0.249475	0.537967	0.664137	0.957633	0.223407	0.505259	-0.385842	0.232451	0.807017	0.783709	-0.887484	-0.199366	0.857193	0.96371	0.489721	0.710061	0.981052	-0.812808	-0.113589	0.584657	0.817511	0.657997	-1.7303	-1.53589	-0.67019	-0.237966	0.837929	-0.931791	0.765117	0.65271	0.441122	0.760716	0.578274	-0.242091	0.466441	1.46226	-0.457003	0.429246	0.882656	-0.803243	-0.418473	-1.47564
TCGA-CN-A642	A	moderate	Yes	Yes	Negative	0.0312457	0.00889307	0.742447	0.749891	-0.855313	0.516355	-0.407274	-1.26665	0.551502	-0.242258	-0.437708	-0.601346	0.405839	0.876329	-0.340843	-0.765247	-0.898731	-0.0242239	0.245332	0.806968	0.778068	-2.00645	0.790394	-0.506652	1.08911	0.461623	0.510222	1.49925	-1.17708	1.11859	-2.64829	-0.957101	-0.158243	-2.00099	-1.59442	-0.345902	0.093285	-1.30774	0.0524645	-2.53591	-0.566757	0.640849	-1.32693	0.225637
TCGA-CN-A6UY	B2a	high	Yes	No	Positive	-1.67949	-1.14078	-0.0996373	-0.642411	-1.47128	-0.608327	-1.52753	-1.54	-2.37756	-3.48833	-2.41172	0.105675	-2.24069	-1.3246	-0.690306	0.161241	-1.66358	-2.27518	-1.41771	-1.81899	-2.21534	-0.399431	-2.33463	-0.867684	-0.929391	-1.39083	-0.311979	-1.42919	-1.17708	-0.162897	-0.623714	0.414129	-2.28825	-0.36831	-1.79502	-0.61004	-0.462119	-1.77341	-1.28091	-0.0674543	-1.42399	-1.97854	1.00098	1.11751
TCGA-CN-A6V1	B2a		No	No	Positive	-1.88296	-1.48187	0.932663	0.736815	-1.87581	-0.936854	-0.807888	-1.50533	-1.3213	-1.19181	-1.41975	0.618903	-0.0958177	-1.75986	-0.0884223	0.655331	-1.30898	-1.52281	-0.203867	0.0329668	-1.13512	-0.579657	-0.279173	0.222172	0.322668	0.130509	-0.67019	-1.42919	-0.364936	0.873864	-0.195711	0.109935	0.249591	-0.976071	-1.73867	0.911066	-0.734628	-0.194878	-1.22408	1.72868	-1.04584	-1.58372	-0.205083	-0.118538
TCGA-CN-A6V3	B1a	moderate	Yes	Yes	Negative	0.460207	0.565616	0.571191	0.641523	0.313973	0.0309088	0.435392	0.200437	0.798676	-0.319749	0.545944	0.605408	0.957002	0.332628	-0.288706	0.584693	0.304048	-0.870991	0.0472393	1.04187	1.13885	0.353639	1.25561	0.310753	0.754189	-0.816664	0.532414	0.82788	1.17011	1.37766	1.19357	0.785694	0.595497	1.01075	1.60321	0.349417	0.0672021	1.59289	0.0248298	0.424655	0.731297	1.02232	0.490879	-0.470943
TCGA-CN-A6V6	B2a	moderate	Yes	Yes	Positive	-0.577452	-0.613413	0.771975	0.926303	-0.311054	-0.859586	-0.601005	0.119229	-0.462992	-0.126999	-0.65818	0.39297	-0.444252	-0.854117	-0.59872	0.525827	-0.0286268	-1.35429	-0.198147	-0.100325	-0.105749	-0.459343	-0.402937	0.28924	1.55813	-0.541448	-0.67019	-1.10147	0.837911	0.703902	0.656549	0.17606	-0.547562	-0.736737	-0.0995503	-0.476851	-1.71433	-0.258352	-1.06065	0.511965	-0.571969	-1.2918	0.279026	-0.463097
TCGA-CN-A6V7	B2a	moderate	No	No	Positive	-2.79068	-0.80198	0.194493	-0.901265	-1.07117	-0.946426	-2.25641	-0.628687	-1.09693	-0.588641	-1.96303	-0.118975	-1.828	-1.83876	-0.955061	-0.0919683	-0.462016	-1.98652	-1.59863	-1.5262	-0.372479	-1.56004	-1.53166	0.0896245	-0.0365409	-0.348793	-0.67019	-1.42919	-0.939787	-0.972629	-0.881054	0.886807	-1.19844	-2.57571	-1.19489	-1.42082	-0.705379	-0.0241678	-1.97257	-0.832535	-1.44452	-1.12832	1.31211	-1.18862
TCGA-CQ-5323	B2a	moderate	Yes	Yes	Positive	0.234304	0.573796	0.460051	0.469294	0.924415	0.551299	0.505686	0.855776	0.083587	0.653746	0.46348	0.566979	0.0350382	-0.45052	0.234077	0.549024	0.744703	0.56945	-0.251873	0.227397	-0.437794	0.54564	0.499249	0.766763	1.10051	0.628971	-0.67019	-0.0941119	0.0240734	-0.0996221	0.476057	0.648338	0.507572	0.892083	1.12088	0.490611	-0.056318	1.35405	-0.0473954	1.33466	0.71625	-0.800196	0.628391	-1.79329
TCGA-CQ-5324	A	low	Yes	No	Negative	0.501596	-0.647379	0.18575	-1.36981	0.153212	0.420642	-0.47032	0.0493584	-0.10078	1.29965	0.452484	0.437719	0.292501	0.615693	0.162332	-0.103814	0.577154	0.793669	-0.250723	-0.227572	0.576733	-0.191341	0.178774	0.378393	0.563768	0.28449	-0.67019	-0.346512	0.830929	0.635319	-1.24112	-0.903097	-0.0525439	-0.609617	-0.0194728	0.164353	-1.75864	-1.10442	-0.885596	-0.272861	0.293385	0.212756	-0.984558	-0.161984
TCGA-CQ-5325	B1b	moderate	Yes	Yes	Negative	0.962491	0.531525	-1.46915	0.505403	0.840851	0.956579	0.656479	0.777453	0.982682	0.931767	0.833587	0.816664	0.452062	0.486938	0.365087	0.785015	0.693076	0.622208	0.755875	0.27918	0.0525237	0.758693	0.691749	1.16929	1.46134	-0.112123	2.28929	1.79586	0.767703	1.46091	0.942965	0.978617	0.822859	1.07876	1.65634	0.551709	1.79529	1.07156	0.695007	1.17122	0.842014	0.537236	0.27508	0.638304
TCGA-CQ-5326	A	moderate	Yes	Yes	Negative	0.301328	0.28679	-0.743848	-0.07195	0.909956	0.0990709	0.745391	0.761338	0.895447	1.29057	0.524434	0.370769	1.22491	0.473288	0.433153	0.277462	0.79438	0.754591	0.591675	0.887374	0.230209	0.482925	0.604146	1.18904	0.310684	-0.156497	4.75538	1.22651	-0.125418	0.66936	0.466783	0.238711	0.344778	1.92242	0.805019	1.13171	-0.0880806	-0.0740995	0.519531	1.79647	0.462706	0.407665	0.69351	-0.0459267
TCGA-CQ-5327	A	low	No	No	Negative	0.278249	0.79614	1.16453	1.11814	0.703063	0.94055	0.328177	0.440885	1.081	1.09386	0.267108	0.908062	0.424174	0.636228	0.237917	0.828612	0.708189	0.522004	0.242918	-0.00437315	0.760942	0.464205	0.285695	0.414667	1.41869	1.54793	0.0581013	1.56886	0.739123	0.588136	0.484034	1.14814	0.738805	0.869347	0.441268	1.88241	0.70583	0.0703061	1.02468	0.570479	0.958194	0.287692	0.857687	0.21608
TCGA-CQ-5329	B1b	moderate	No	No	Negative	-0.0621972	-0.214727	0.405772	0.370183	0.533233	-0.16433	0.506695	0.574847	1.07444	-0.307859	-0.212129	-0.254348	-0.080988	0.795373	-0.400734	-0.502657	0.406889	0.748565	0.39725	-0.245078	0.168247	0.760259	-0.37203	-0.084799	1.20254	-0.671219	1.30661	0.307635	0.140349	1.10004	1.0005	-0.0665567	0.645524	0.967147	-0.0115717	0.475941	0.690891	0.101616	0.155093	-0.257652	0.370934	1.07158	0.439614	0.417617
TCGA-CQ-5330	B1b	moderate	Yes	No	Negative	-0.716503	0.428124	-0.63308	-0.112737	0.052239	-0.353767	0.24442	0.173936	0.789328	-1.39967	-0.634524	-1.20352	0.698435	1.1017	-0.309446	-1.1823	0.0406438	0.472474	0.274394	0.491018	-0.164722	0.0848766	0.865229	0.204824	1.68945	0.868341	0.539111	0.257253	0.439261	0.691578	0.767392	-1.30574	0.632934	0.256735	0.290104	-0.108872	0.406423	0.647777	1.12591	-0.753098	-1.07511	0.143127	-0.137608	0.385802
TCGA-CQ-5331	A	low	Yes	No	Negative	1.07906	1.09155	0.971138	1.30944	1.3863	1.03288	0.891084	1.34806	1.08817	1.07778	0.963125	0.805632	0.104283	0.684867	1.09861	0.734949	1.03664	0.821152	0.497245	0.188008	0.368391	0.96655	0.865281	1.58162	2.05313	0.373661	0.361796	1.25741	1.04634	-0.118557	1.28237	0.436389	0.975158	0.636828	0.852227	0.401954	1.08075	1.4436	0.676043	1.36193	1.71019	0.385291	-0.483789	1.15342
TCGA-CQ-5332	B2b	moderate	Yes	Yes	Negative	0.834046	-1.78595	-1.34817	-1.33169	0.0075614	0.270397	-0.707974	0.126133	-1.5608	1.15354	1.04636	-0.761083	0.145094	-0.157903	-0.0410368	-1.01567	0.342849	-0.613367	-1.37878	-0.0843416	-0.596462	-0.082928	-0.650529	-1.09626	-2.08771	0.541166	-0.67019	-1.05873	-1.17708	-1.23603	-1.36163	-1.48876	-0.0376354	-0.216115	0.456161	0.058255	-1.77055	0.181199	-1.62477	-0.448633	0.72174	-0.143646	-0.279901	-1.38616
TCGA-CQ-5333	A	moderate	Yes	Yes	Negative	-0.382971	1.00025	0.940591	-1.22912	-0.596393	-0.502376	0.422502	-0.733319	0.294853	-0.468792	-0.798634	-0.797546	-0.336307	0.321311	0.0649988	-0.443484	-0.336964	0.297711	-0.0719812	-0.535075	0.286073	-0.513741	-0.218859	0.748347	1.44128	-0.526428	-0.28092	1.34411	-0.356726	1.02105	0.316918	0.218797	-0.622826	0.816868	-0.931037	-0.304121	-0.464261	0.608744	0.124601	-0.632667	-0.774943	0.195301	-1.07237	-0.8504
TCGA-CQ-5334	A	moderate	Yes	No	Negative	0.161278	-0.628932	0.945892	0.865437	0.377293	0.419544	0.37568	0.716681	0.961621	0.895133	-0.168942	0.409402	0.616311	0.394961	0.329415	0.330094	0.18917	0.421187	0.209391	0.0748942	0.70158	0.2766	0.390734	1.37746	1.49167	-0.291556	0.0491318	1.35559	0.51236	1.00408	0.507984	0.54687	0.212563	0.476038	0.487353	0.429839	1.33043	0.239014	1.36567	0.199686	1.17604	0.463458	-0.877274	-0.528162
TCGA-CQ-6218	B1b	moderate	Yes	No	Negative	1.29148	1.59048	-0.244597	1.18226	1.64721	1.23958	1.04779	1.55564	1.09672	1.31231	1.04518	1.10679	0.61754	0.575927	1.26638	1.05252	1.32541	1.06992	0.722959	0.44483	0.728773	1.35504	0.527275	1.41986	0.810425	0.818682	0.535807	1.30245	0.95338	1.65324	1.27214	1.06673	1.32992	1.00417	1.50377	0.835459	1.38845	1.46664	1.58236	0.77714	1.09947	1.09651	1.18985	0.855853
TCGA-CQ-6219	B1b	moderate	Yes	Yes	Negative	0.43169	-0.0146558	-1.73412	0.0415662	0.190501	0.764385	0.389081	-0.0424182	0.952246	0.300658	0.584181	0.0848902	-0.181478	0.121359	0.244533	0.278464	0.0379206	-0.153057	0.674861	-0.307045	-0.799448	0.126594	-0.266976	0.525339	1.02658	0.00572254	-0.0545359	0.539632	-0.454815	1.17565	-0.374542	0.56269	0.873709	0.520622	0.468679	0.701747	-0.376465	-0.0572047	-0.456603	0.165762	0.0757959	1.09087	-1.09926	-0.0276684
TCGA-CQ-6220	A	low	No	Yes	Negative	0.698034	0.697369	0.858804	1.08049	1.59895	1.08287	1.02734	1.49612	1.36973	0.973571	0.676688	0.914493	0.605727	0.823232	1.32991	0.809942	1.2738	0.454586	0.966588	0.948277	0.9345	1.09106	1.17942	1.67344	0.95667	1.39129	-0.0749649	-0.0341082	0.686883	0.274577	1.00097	1.15122	0.596304	1.45054	0.870795	1.1986	0.840719	1.42912	0.653677	0.776117	1.54588	0.508523	0.56489	0.870441
TCGA-CQ-6222	B1b	moderate	Yes	No	Negative	0.77523	0.420215	-0.262837	2.11353	1.24297	0.471565	0.733461	1.36613	0.664785	0.349472	0.585889	1.26298	0.855401	0.133228	0.382765	1.21269	1.06652	0.271523	0.196832	0.938347	0.352596	0.936217	-0.0514507	1.35037	0.538673	1.21941	-0.67019	1.19266	1.30989	0.564111	0.97143	1.29181	0.790342	0.974815	0.682762	1.4029	0.641723	0.839459	0.985137	1.60068	0.941576	0.750493	0.732782	-0.335586
TCGA-CQ-6223	A	moderate	Yes	No	Negative	1.58132	0.416236	0.941172	-0.148869	1.28021	1.38366	0.86821	1.22122	0.979257	0.841899	1.42786	1.382	1.34474	0.513818	0.957086	1.25941	1.31283	0.504626	0.486984	1.09735	1.11051	1.34434	0.761272	1.91716	0.732573	0.606718	-0.419045	0.434192	1.29142	0.652377	1.28186	1.50183	1.23535	1.30157	1.05452	1.38928	1.30936	1.12549	-0.177882	0.485895	1.47753	0.427103	0.346636	1.13025
TCGA-CQ-6224	B1b	moderate	Yes	Yes	Negative	-0.512674	0.122723	-1.73569	-0.929521	-0.459534	0.556143	0.244506	-0.296252	0.0855296	-0.53799	-0.335229	-1.8157	-0.143271	0.700797	-0.101066	-1.49613	0.039466	0.0494611	0.36787	-0.415741	-2.20995	-0.297304	0.23665	-1.40708	0.756037	0.969279	0.316977	0.260289	-0.908272	0.186195	-0.8443	-1.27165	-0.486576	-0.327595	-0.0403012	-0.729118	0.537865	0.535222	0.572515	-1.45621	-2.1021	0.732531	-0.392016	0.602419
TCGA-CQ-6225	B1a	low	Yes	No	Negative	0.514048	-0.934156	-0.028118	0.456306	-0.411449	0.366201	-0.122732	-0.30548	-1.68065	-0.625409	0.763185	0.019153	-0.0687308	-0.439609	-0.694383	0.0202539	-0.212651	-0.0169389	0.0269975	0.454587	0.989582	-0.197624	-0.712307	-1.2267	-1.91017	-0.661717	-0.419945	0.245495	-0.367776	-2.93814	-0.781469	-0.275805	0.326111	-0.841007	-0.23554	1.07058	-0.864915	-0.364515	-1.53947	-0.140391	0.35018	-1.03672	-1.22995	0.131598
TCGA-CQ-6227	B1b	high	Yes	Yes	Negative	0.331544	-0.592978	-0.998439	1.03878	0.372631	0.219759	0.49945	0.494	1.17912	0.702599	0.39592	0.0989574	0.310825	0.667775	0.622311	0.173685	0.11103	0.928659	0.593651	-0.620793	0.52407	0.448068	0.271752	0.872991	-0.93402	0.512279	2.04251	1.00525	0.699774	-0.331161	0.514629	0.31057	0.0693791	0.665185	0.318046	0.771151	0.640663	0.253402	0.174226	0.356626	0.767569	1.21395	0.875972	1.18512
TCGA-CQ-6228	B2b	high	Yes	Yes	Negative	-0.342331	-0.460725	-0.987175	-1.23463	-0.703579	-0.082889	-1.23287	-0.313354	0.0796661	-0.654219	-0.241921	-0.240389	-0.194818	-1.03791	-0.639161	-0.243499	-0.607788	-0.0265887	-0.533688	-1.10215	0.693049	-0.424947	0.331702	-1.58861	-1.16966	0.290771	-0.67019	-0.708128	-0.946045	-0.919598	-0.307375	-0.456333	-0.723047	-0.369648	-0.461396	-0.0328815	-0.13416	-0.211653	-2.4385	-0.603147	-0.579887	-1.20243	-0.502166	-0.982337
TCGA-CQ-6229	B1b	moderate	No	No	Negative	1.0074	0.517479	0.454743	1.13197	1.39134	0.869204	0.842632	1.28316	1.44752	1.39993	0.929289	0.806154	0.261491	1.07907	1.03482	0.940706	0.785772	0.862139	1.05777	0.55983	0.21406	1.0565	1.53207	1.39374	1.203	1.02858	0.332709	0.614279	-0.000577115	1.09587	1.15849	0.844063	1.15168	0.717873	0.99935	1.26033	0.13498	1.30141	0.0162368	0.801688	1.01381	1.12812	0.315557	0.734199
TCGA-CQ-7063	A	low	Yes	Yes	Negative	1.02574	1.92043	1.11408	1.74413	1.05321	0.784074	0.750134	1.12368	1.1761	1.26477	0.810403	0.62029	0.806284	0.941856	0.966266	0.578399	0.790887	0.764704	0.81471	0.696058	1.06005	0.792438	1.64399	1.37318	1.55265	0.68601	-0.67019	0.871496	1.20974	1.78839	1.22784	0.658424	0.977154	0.843068	1.40168	0.79902	1.42735	1.21176	1.41211	0.641548	1.16621	1.04869	1.06671	1.45935
TCGA-CQ-7065	A	moderate	No	No	Negative	0.204909	0.813583	0.0889335	0.4902	0.920581	0.554964	1.0612	1.33578	0.780529	1.1494	0.529733	0.551017	0.0687218	0.464841	1.04487	0.829378	1.1196	1.06359	1.11775	0.00635131	0.140365	1.17553	-0.089357	1.11365	-1.14111	1.80348	0.033719	0.900206	0.0697686	-0.421437	1.27884	0.279909	0.425606	0.829895	0.124314	0.848895	1.60615	0.713992	0.972746	-0.972854	0.584754	0.935354	0.739954	1.34615
TCGA-CQ-7067	B1b			No	Negative	-0.131981	0.545389	0.647879	0.507941	0.315923	0.582063	-0.0710412	0.193398	0.669166	0.0175266	-0.280565	0.202175	0.0198308	0.399946	0.00514243	0.142877	0.287657	0.0512423	0.651412	0.303689	0.276878	-0.136643	0.67127	-0.35327	0.646666	1.78552	-0.42712	0.21928	-0.130738	0.569709	0.473106	0.223795	0.662648	-0.11477	-0.11602	0.693515	1.64125	0.402743	0.815302	-0.231949	-0.49075	0.218529	0.37339	1.21494
TCGA-CQ-7068	A	low	No	No	Negative	0.397538	-0.445471	0.593095	0.934287	-0.112408	0.789361	0.0901091	-0.391886	0.424928	0.322999	0.307081	0.230454	0.402595	0.769605	0.0431561	0.310613	-0.226419	-0.482982	-0.00869464	0.431794	0.329654	-0.334268	0.525199	0.905933	1.43188	-0.54245	-0.67019	1.01763	0.673785	1.59311	-0.900464	0.34678	0.181013	0.357599	0.931089	1.22801	-0.0842615	-0.053311	0.901299	0.742341	0.334744	1.06243	-1.13538	-0.415808
TCGA-CQ-7069	A	low	No	Yes	Negative	0.767722	-0.332983	1.08436	-0.346725	0.803597	0.49379	0.576394	0.818549	0.671467	1.74687	0.537109	0.225573	1.27402	1.25339	1.20757	0.198392	0.318948	1.28573	1.2627	0.907834	0.955022	0.772079	0.668042	0.846602	-0.786352	0.941758	0.818484	0.614535	1.87377	0.351429	0.483267	0.139465	0.114709	0.546344	0.850553	0.0139698	1.72611	0.0786602	0.379004	-0.246617	0.589844	1.2706	1.09582	2.90609
TCGA-CQ-7071	A	low	No	Yes	Negative	1.3478	1.16061	1.16799	0.840616	1.51647	0.912588	1.0038	1.41913	1.21608	1.18497	1.12595	1.20547	0.493566	0.98645	0.796883	1.234	1.22366	0.889193	0.645867	1.06108	0.847465	1.04595	1.17457	1.90153	0.94506	0.669594	-0.297179	1.11416	1.09048	1.22166	0.876236	0.743313	0.950983	1.40778	1.30636	1.15416	-0.000418716	1.01367	0.601193	1.43364	1.3574	0.563106	1.20243	1.19316
TCGA-CQ-7072	B2b	high	Yes	Yes	Negative	-1.04086	0.653566	0.120944	-1.97297	-2.07112	-0.818754	-0.216831	-1.83299	-0.0871108	-1.67103	-2.20116	-3.23049	-1.3768	-0.289192	-1.5807	-2.98637	-1.87933	-0.570874	0.361196	-0.82014	0.396156	-1.87215	-1.00864	-2.22636	-1.34738	-2.43101	-0.359788	-0.812623	-0.877484	-0.407672	-0.78555	-2.10381	-1.53772	0.966899	-2.56272	-2.42087	-0.454687	-0.8226	-0.678261	-2.61898	-2.16239	-0.216561	-2.26996	-0.859036
TCGA-CQ-A4C6	A	moderate	Yes	Yes	Negative	0.857838	1.31401	-0.205052	0.52258	0.921212	0.890854	0.723712	0.867417	1.06357	1.24339	1.02786	0.184456	0.621023	1.105	1.05528	0.114741	0.578054	0.579976	0.777959	0.571599	-0.845245	0.765324	1.31155	0.440257	1.3336	0.956084	1.31458	1.31893	0.79737	1.43558	0.981883	0.285283	0.823088	0.882726	1.34215	0.972742	1.11308	1.26327	1.41861	0.454102	0.574705	1.13255	0.898814	0.929719
TCGA-CQ-A4C9	B1a	low	Yes	No	Negative	-0.0975094	-0.982061	0.544804	-0.19757	-0.637665	-0.374107	-0.196573	-0.742956	-0.907865	-0.674366	-0.415501	0.710221	0.567766	-0.674943	-1.33467	0.495199	-0.755919	0.426973	-0.166583	0.288194	0.683316	-0.587945	0.396515	-0.300252	-0.912087	-0.29928	-0.67019	-1.1477	2.09321	-0.489129	-0.598213	0.420383	-0.234975	-1.09759	-0.234119	1.19658	1.60913	0.149092	-0.280336	1.45339	0.171026	-1.483	-1.29241	-0.998876
TCGA-CQ-A4CA	B1b	moderate	Yes	Yes	Negative	-0.072581	0.767856	1.09219	-1.08513	0.771692	0.76455	1.00128	0.917483	0.660389	0.0197778	0.16999	-0.332138	-0.256323	-0.314784	0.985027	-0.237654	0.558564	0.842607	0.691893	-1.77144	-1.4095	0.988104	0.131987	-0.504455	1.06258	1.24911	0.170615	0.49856	0.422816	1.413	1.3377	0.801874	0.755838	-0.72888	-0.126847	-0.145278	1.14254	0.332063	0.662602	-0.996837	-0.630366	0.45223	-0.241665	1.70182
TCGA-CQ-A4CB	B1b	moderate	Yes	Yes	Negative	-0.0743736	0.668737	-0.863728	-0.843522	-0.046667	0.557829	0.243571	-0.478591	-0.356099	0.231197	-0.19624	0.127448	0.887324	1.27919	-0.143309	-0.284491	-0.155826	0.714363	-0.188847	0.875274	-1.06934	-1.64604	0.781291	-0.449934	0.309764	-0.357888	2.14271	-1.42919	-0.866687	0.327022	-0.209816	-0.0306172	-0.730936	1.16812	0.0368577	-2.50585	0.455684	-0.497158	0.382485	-0.297615	-0.226875	1.11833	0.84577	0.257611
TCGA-CQ-A4CD	A	low	No	Yes	Negative	-0.184476	0.288677	1.27756	1.03544	-0.404538	0.488252	0.212807	-0.423085	0.0226543	0.462134	-0.884791	0.295492	1.27963	0.100719	0.154166	-0.014746	0.13275	0.662127	0.27094	1.5061	1.19639	-0.406234	0.343177	-1.02127	0.500652	1.15151	2.01613	0.609818	0.320898	0.827992	-1.5927	0.119912	0.69239	-0.27382	0.0842393	-0.660221	1.10627	-0.405791	1.11346	-0.00314046	-0.177616	0.849952	0.763514	1.72811
TCGA-CQ-A4CE	A	low	No	Yes	Negative	1.2131	0.777172	1.51231	1.24736	1.55911	1.03982	1.06769	1.6937	0.79568	0.87479	1.07646	1.20201	0.763347	1.06251	0.615719	1.10352	1.28535	0.615272	0.337876	0.716886	1.5159	1.4378	1.5488	2.17542	0.838069	0.220062	-0.302308	0.551467	1.51733	0.137643	1.03244	1.37238	1.50771	1.29876	1.21427	1.38856	0.605969	1.90949	1.81753	0.34751	1.53807	0.570417	-0.255243	0.661739
TCGA-CQ-A4CG	A	moderate	Yes	Yes	Negative	-0.0914252	0.360348	0.604388	-1.18076	-0.0989487	0.144953	0.186282	-0.520179	-0.564977	-0.148925	-0.365619	-0.784618	0.315102	0.954599	-0.0322093	-0.809688	-0.196967	0.272198	-0.664462	-0.417079	0.0363339	-0.568066	0.166927	-1.37653	0.0696614	-0.889724	0.231314	-0.0142617	-1.17708	0.435482	-0.85578	-1.83298	0.622672	-0.21913	-0.085528	-0.643086	-0.748109	-0.256866	-1.09707	-1.49821	-1.06358	0.980812	0.640508	-0.26533
TCGA-CQ-A4CH	A	moderate	No	Yes	Negative	0.787707	-0.271345	0.940806	0.523867	0.436237	0.268797	0.250288	0.439145	0.22623	0.513609	0.951347	0.249258	0.730414	0.893206	0.245706	0.204888	0.150926	0.692549	1.08687	0.869485	0.636728	0.392031	0.579172	0.313598	-1.44699	-0.287544	0.116219	0.305939	2.06908	0.558908	-0.753246	0.289529	0.614166	1.0129	1.12446	0.136913	0.0866824	0.27183	1.51119	0.975156	0.928158	1.05175	-0.0346174	0.20641
TCGA-CQ-A4CI	B2b	low	Yes	Yes	Negative	-1.62625	-2.44824	-1.06977	-3.22472	-1.38278	-0.0762887	-0.903544	-1.10711	-2.75848	-1.07732	-0.573891	-2.7222	-1.63049	0.270752	-1.17084	-2.97897	-0.73619	-0.157675	-1.94129	-1.23277	-1.13917	-1.93512	-0.731168	-1.94173	-2.43706	-0.506692	-0.67019	-1.42919	-1.17708	-1.11995	-2.33331	-3.2182	-0.989359	-1.61667	-1.58825	-0.833834	-1.64709	-0.658844	-1.32605	0.0122991	-0.361842	1.85465	-1.03003	-2.09007
TCGA-CR-5243	B2a	high	No	Yes	Positive	-1.77398	-0.866489	-0.835271	-0.706596	-1.18876	-0.720718	-1.65722	-1.27646	-1.96604	-1.2114	-2.22992	-0.433946	-1.61725	-0.734158	-0.450605	-0.227744	-1.50393	-1.19158	-0.557555	-1.60171	-2.56162	-0.676826	-2.08628	0.0502515	-0.510968	-0.985854	-0.67019	-0.735708	-0.307648	-0.209904	-0.327595	-0.42043	-1.32602	0.176114	0.331698	-0.206757	-0.680673	-1.38516	-1.57599	0.176822	-1.0228	-1.77874	0.523942	0.261207
TCGA-CR-5247	B1a	moderate	Yes	Yes	Negative	-0.147612	-0.923021	-0.186254	-1.88887	-0.145296	-2.61873	0.667022	-0.268126	-1.81924	-0.744498	-0.533465	-2.39228	-0.0329245	0.0874533	0.163225	-2.56688	0.209416	0.618889	0.842005	-0.0102554	1.06745	0.210451	-0.150564	0.372666	-1.17543	-1.27884	-0.326249	-0.198752	-0.813277	-0.782455	0.164872	-1.80843	-0.332396	-1.26024	-2.20273	0.885594	0.836989	-0.212879	-1.81113	-1.53733	-0.445478	1.46766	-0.789281	-0.519546
TCGA-CR-5248	B2a	low	Yes	Yes	Positive	-1.09201	-2.27145	-0.876306	0.775433	-0.659369	0.0494791	-1.1136	-1.12848	-1.86456	-0.649749	-2.42956	0.486575	-1.32724	-2.61549	-0.254166	0.620307	-0.958158	0.62133	0.0238752	-0.80725	-0.342858	-0.744083	0.00406056	0.0232256	-0.215291	-0.759997	-0.345691	-0.416332	-0.863879	-0.230854	-1.10808	-0.00840441	-1.0509	-0.492462	0.547043	0.883504	-1.5713	-0.0117298	-1.35719	1.29166	0.0624948	-1.82376	0.068441	-0.260586
TCGA-CR-5249	B2a	moderate	No	Yes	Positive	0.322283	-0.884936	-0.29217	0.0707013	-0.0162789	-0.18414	-1.10337	0.289528	-0.398768	0.384702	0.338524	0.657528	0.346226	-1.86027	-0.470941	0.653091	0.0582091	-1.47873	-0.481877	0.432735	-0.26017	0.0116384	-0.264874	-0.778659	-0.396932	0.405095	-0.67019	-0.399412	-0.509162	-0.264522	-0.0770667	0.642243	0.54742	0.165276	1.51789	0.288365	-0.228689	0.436951	-1.08112	-0.401236	0.0452911	0.369531	0.90139	-0.770957
TCGA-CR-5250	B2a	moderate	Yes	Yes	Positive	-0.881688	-1.03217	-0.49036	-0.321433	-0.619492	-0.981151	-0.894948	-1.00623	-1.87004	-0.433859	-2.06873	-0.216984	-1.29176	-1.48163	-0.714856	-0.187647	-0.888431	-1.56061	-0.340478	-1.32993	-0.089664	-0.988754	-1.59132	-1.31616	-1.3789	-1.35636	-0.400841	-1.42919	-0.865679	-0.577881	-1.07719	-0.678218	-2.78542	-0.200272	0.592859	-0.991145	-1.64505	-1.12298	-1.28509	-0.280645	-0.783487	-0.658328	0.117112	0.328578
TCGA-CR-6467	B2a	moderate	Yes	Yes	Negative	-2.04031	-1.43657	-1.55804	-0.427813	-2.72272	-1.59971	-3.53534	-2.41617	-2.09067	-1.31579	-2.78695	-2.47206	-0.629824	-2.39319	-2.10338	-2.11521	-2.6539	-2.27518	-1.66374	-0.575061	-0.770474	-2.21783	-2.52681	-0.494311	-0.288998	-1.89216	-0.323418	-1.19635	-0.992108	-0.393371	-0.890255	-1.01939	-1.16034	-2.32793	-0.242682	-1.16263	-1.50943	-1.09725	-1.92705	-1.11689	-2.23992	-1.46328	1.29702	0.0213836
TCGA-CR-6470	B2a	high	No	Yes	Positive	-0.223064	-1.78284	-1.88967	0.111674	-1.97283	-1.08281	-3.30106	-1.84403	-0.386754	-1.02464	-0.0440786	-0.7231	-0.253112	-2.45894	-1.61585	-0.724765	-2.26541	-2.27518	-2.12107	-0.626246	-1.72018	-1.45478	-2.76328	-0.488745	0.484957	-2.06733	-0.67019	-1.01254	-1.17708	0.447278	-2.09941	-0.622509	-0.785308	-2.3842	1.17164	-2.29833	-0.899173	-0.681178	-1.52332	-1.48934	-1.63623	-1.69476	1.12286	-0.620675
TCGA-CR-6471	A	low	Yes	Yes	Negative	1.02382	1.02333	0.76402	0.949313	1.29631	0.89105	0.876304	1.72822	0.596277	1.00482	0.71276	0.866475	0.413597	0.145145	0.524293	0.746346	1.03066	0.900726	0.514452	-0.360889	-0.236949	1.16643	1.04494	0.573154	0.749395	1.06464	-0.0374556	-0.0364701	1.015	0.594715	1.07422	0.355742	1.04623	0.886906	0.790176	0.343615	0.220666	0.238184	0.578274	1.80395	1.11107	0.582489	0.85324	0.0140539
TCGA-CR-6472	B2a	moderate	No	Yes	Positive	-1.04261	-2.05683	-2.0713	1.26792	-0.184167	-2.77675	-2.91413	-0.27422	-1.2138	-1.02368	0.242543	0.542883	-1.23766	-3.42302	-0.740267	0.537177	-0.230081	-0.289402	-2.25728	-1.30506	0.0225956	-1.61302	-2.79928	-1.00621	-1.23747	-0.363611	-0.67019	-1.42919	-1.17708	-1.25322	-1.01745	-2.92727	-0.753754	-2.69521	-0.315102	-2.20829	-2.22636	0.709354	-1.47698	-0.685731	-2.61727	-1.84867	-0.0484291	-1.21378
TCGA-CR-6473	B2a	moderate	Yes	Yes	Positive	-1.78856	-0.918502	-1.36714	-0.0208645	-1.33214	-0.029547	-1.38986	-0.985394	-2.72711	-0.395375	-1.96375	-0.229419	-0.656084	-0.619894	-1.10823	-0.484629	-0.680336	-1.92356	0.551995	-0.719208	-1.66248	-2.36475	0.490206	0.507611	-0.992756	-1.55774	0.0337534	-1.42919	-1.17708	-0.249887	-1.24128	0.615221	-3.56533	-1.21787	-0.972665	-2.99122	-1.79065	-2.4588	-1.87093	-0.0345458	-0.503813	-0.540761	1.0904	-1.54492
TCGA-CR-6474	B1b	moderate	Yes	Yes	Negative	0.622225	-0.172549	-0.596318	-0.626416	-0.280141	-0.73571	0.177517	-0.142815	-0.195205	-0.0447126	0.602014	-0.803908	0.840497	-0.0670521	0.0809053	-0.867622	0.0343855	0.665406	0.431362	0.0841546	0.805168	-0.178623	-0.611076	-0.0954934	-0.19149	-0.383245	-0.257221	0.415677	-0.952826	-0.525242	-0.487699	-0.757264	-0.582056	0.63477	-0.596791	-0.471946	-0.183397	-0.417663	0.806876	-0.525538	-0.456306	0.859975	0.00969867	1.02913
TCGA-CR-6477	B1b	moderate	Yes	Yes	Negative	1.20438	0.570465	0.299179	0.205706	0.833803	1.16228	0.487106	1.061	-0.255188	0.577049	1.22226	0.497158	0.51614	0.439497	1.24737	0.397284	0.607604	1.37495	-0.201973	-0.484268	-0.321411	0.749203	-0.276104	0.749886	-0.715576	0.861237	-0.67019	0.747017	0.551016	0.121371	0.118585	0.333974	1.02723	0.427825	0.539307	-0.647109	-0.327517	1.68292	0.48547	-0.222171	1.21501	0.188267	-0.0558327	0.030768
TCGA-CR-6478	B1b	moderate	Yes	Yes	Negative	0.0648183	-1.98456	-2.51142	-1.01382	0.330627	0.343326	0.344436	-0.214331	0.182634	0.304568	0.0168252	-0.242423	-1.07731	0.0301651	-0.234372	-0.31543	0.032719	0.739578	-0.958985	-1.34601	-1.10863	-0.105362	-0.175943	0.262445	1.63059	-1.56158	1.39659	0.0834691	-1.17708	0.90008	0.489466	-0.104709	-0.443634	0.876533	0.256794	-0.921866	-0.182099	-0.0387158	0.279477	0.241419	-0.316227	1.23412	-0.485959	-0.431081
TCGA-CR-6480	B2a	moderate	No	Yes	Positive	-0.706943	-1.41633	-0.162835	0.769632	-1.56545	-1.99418	-2.02531	-1.38888	-0.791929	0.264841	-0.90003	0.729411	0.405845	-2.26945	-1.01344	0.596904	-1.48193	-2.12072	0.246972	-0.162826	0.632212	-1.59847	-0.441181	-0.198984	-0.142266	0.721436	-0.67019	-1.42919	0.726886	-0.00690216	0.144982	0.913335	-0.451349	-0.165027	1.07133	-0.0626799	0.222205	-0.492153	-1.9954	-0.140997	-0.562129	-0.975629	0.113206	-1.27409
TCGA-CR-6481	B1b	moderate	No	Yes	Positive	0.432974	-0.727356	-1.03403	-0.59941	-0.347701	-1.64817	-0.2961	-0.617263	-1.05794	0.335473	0.0332875	0.738454	-0.214304	-2.26757	-0.837187	0.695437	-0.383972	0.0502026	0.306339	-0.870956	-0.657024	-1.12241	-0.895155	-0.682438	0.489863	-1.77588	0.6113	-1.21956	-0.942881	0.172714	-0.753114	0.330351	-0.170692	-0.759185	0.55822	0.243912	-1.05772	0.283809	-1.45494	0.894176	-0.649406	0.110469	0.92003	-1.25143
TCGA-CR-6482	B2a	high	Yes	Yes	Positive	-1.26541	-1.12823	-1.76607	0.500524	-1.80025	-1.19394	-1.36094	-1.61817	0.193239	-0.945274	-1.07165	-0.740789	-1.16932	-1.19755	-1.95542	-0.650067	-1.91472	0.0925766	-1.45251	-1.79904	-2.23628	-1.79967	-0.780752	-1.21671	0.690884	-1.1233	-0.67019	-1.29282	-1.17708	0.407927	-1.03183	-0.910237	-1.58577	-0.466323	-1.19595	-1.0756	-1.48829	-0.423793	-0.0765733	-0.717067	-0.382939	-0.862905	-0.650511	-0.662753
TCGA-CR-6484	A	moderate	No	No	Negative	0.527626	1.58895	0.250386	0.878815	0.357343	0.567329	0.50757	0.699751	0.551816	-1.13909	0.318644	0.996658	1.06785	-0.278939	-0.870977	0.794307	0.532148	0.338853	0.50658	1.17043	0.993139	0.443273	0.72629	0.355669	1.3378	0.343118	-0.67019	0.985248	1.68186	0.846681	0.490083	1.20872	0.853291	0.250386	0.652573	0.574528	0.667305	0.830925	-0.327142	1.13433	1.09241	-0.313174	0.781068	0.425995
TCGA-CR-6487	B2a	moderate	Yes	Yes	Positive	-2.92442	-1.45544	-3.77271	-1.7748	-3.10629	-2.6725	-3.97382	-2.55234	-1.66005	-1.73176	-1.38139	-2.8001	-3.79277	-2.40565	-2.09646	-3.15952	-3.23702	-2.11175	-4.33391	-2.80139	-3.58525	-3.13251	-0.862958	-0.452107	1.00932	-2.33226	-0.67019	-1.3091	-1.17708	0.770627	-3.15823	-1.01924	-2.13344	-2.99046	0.684581	-3.04296	-1.77024	-0.566523	-0.577828	-1.32605	-2.33887	-2.1893	-1.31467	-2.09007
TCGA-CR-6488	B1b	moderate	No	Yes	Negative	-0.384632	0.391639	0.603705	1.3948	0.733452	0.597859	0.493125	0.866205	0.840989	0.256201	-0.070345	0.0999732	0.801492	0.131238	0.413426	0.162254	0.324113	1.04492	0.863265	0.57332	0.19361	0.720735	0.411591	0.421025	-0.217646	-0.35423	0.508512	1.05472	1.29805	0.644721	0.246353	0.513908	0.0526795	0.37627	0.858594	1.58964	0.863952	1.04317	1.65069	0.317739	1.0224	0.664247	0.384534	1.58756
TCGA-CR-6491	A	low	Yes	Yes	Negative	1.0832	0.00190905	0.518122	-0.102553	1.39711	0.675532	1.12241	1.48955	0.942645	1.11711	0.986679	0.786002	1.00867	0.579334	1.15676	0.711139	1.47894	1.06885	1.25473	1.01008	0.215295	1.18301	0.382837	1.54451	-0.147057	0.323112	1.33646	1.13072	0.336588	0.3116	1.00747	0.527336	0.919798	1.55627	1.49342	-0.0460569	1.5736	0.821485	0.0423568	1.69359	1.10926	0.373175	0.825482	0.776356
TCGA-CR-6492	B1b	low	Yes	Yes	Negative	1.05785	0.774052	0.422834	0.960374	0.816405	0.922469	0.522569	0.671168	0.399906	0.956596	0.808858	0.915856	0.674967	0.720534	0.518238	0.910108	0.556301	0.314815	0.470869	0.606715	0.747177	0.529837	0.183246	0.54094	0.761322	0.731091	0.0472718	-0.115621	1.43044	0.666948	0.688555	0.878168	0.669043	1.02097	0.984841	0.75428	0.957231	0.329691	1.35424	0.185904	0.994319	0.236375	0.00361712	0.325356
TCGA-CR-6493	A	low	Yes	Yes	Negative	0.361396	0.671566	-0.0990204	0.158463	0.351944	0.195982	0.556308	0.292316	0.926448	0.697899	0.480388	-0.0889337	0.629773	1.18397	0.0293949	-0.171477	0.290799	0.890744	0.419143	0.282505	-0.13991	0.259487	0.447567	0.220288	0.434014	-0.381077	0.305932	1.62234	0.0657991	0.765658	0.819749	-0.455898	0.105031	1.30814	-0.0638327	-0.0558396	0.51468	-0.492779	0.224808	-0.476648	0.357327	1.0848	0.912548	-0.918632
TCGA-CR-7364	B1a	moderate	Yes	No	Negative	-0.0214257	-0.990421	-1.17275	0.805245	-0.251575	-0.591726	-0.378543	-0.327771	-0.279981	0.533315	-0.2377	0.0366013	0.280138	-0.854043	-0.581133	-0.11035	-0.106351	-0.925417	0.63905	0.276111	0.715076	0.0157174	0.159048	0.0714223	-0.669879	-0.150888	-0.67019	-0.156746	0.191128	-1.16182	-0.213663	0.486427	-0.499423	-0.517619	0.105444	0.731242	-1.15418	-2.08571	0.276676	-0.0155973	0.742855	-0.150216	-0.873962	-0.695603
TCGA-CR-7365	B1b	moderate	Yes	Yes	Negative	0.617243	-0.686875	-0.195569	-0.286539	1.06453	0.428604	0.858363	1.06497	0.872694	0.974723	0.701874	0.194991	1.30974	0.582834	0.478558	0.190973	0.973887	0.839418	1.03519	1.21456	1.1821	0.750418	0.523365	0.948318	-0.419493	0.804356	-0.67019	1.3926	0.790567	-0.179106	0.371176	0.0782308	0.332851	1.18816	0.795703	0.997822	1.34764	0.810565	0.224488	1.11758	1.27356	0.667002	-0.0488421	0.680292
TCGA-CR-7367	B1b	moderate	Yes	Yes	Negative	0.662838	0.672717	0.793491	1.08072	0.638335	0.828087	0.269352	0.794025	1.2053	1.07304	0.626998	0.524968	1.20765	0.620544	-0.0342546	0.467091	0.451186	0.556237	-0.0582729	1.65206	1.62991	0.759153	0.40629	1.52043	-0.114593	-0.831377	-0.43265	1.95153	0.464183	-0.04699	0.238124	0.634266	0.768286	1.38245	1.31014	1.05002	-0.551531	1.25973	0.117155	-0.0188343	1.56183	0.522025	-0.776475	0.651803
TCGA-CR-7368	B2a	moderate	Yes	Yes	Positive	0.422469	-0.377471	-0.201408	1.8646	0.129943	-0.417973	0.411498	0.47578	0.139797	0.33299	0.792994	0.80339	0.732735	-1.05721	0.101116	0.697164	0.226699	0.108411	1.1071	0.190998	-0.462995	0.321265	0.316546	-0.661046	0.0399292	-0.175626	-0.0354673	0.615755	-0.812632	-0.0646993	0.927162	0.932898	0.491971	0.697901	1.12399	0.700274	-0.708537	0.70179	-1.00999	0.86641	1.29124	-0.423629	0.272642	-1.02297
TCGA-CR-7369	B2a	moderate	Yes	Yes	Positive	0.695246	0.0775691	-0.190575	0.589917	0.44726	0.471847	0.235731	0.50737	-0.0127572	0.692215	0.377516	0.539315	0.369021	-0.103118	0.0390423	0.572551	0.42521	0.268522	0.788245	0.690067	0.149827	0.346112	0.363787	-1.01415	-0.446563	0.115873	0.0340632	-0.836738	-0.0253675	-0.844364	0.262272	0.232762	0.760094	0.241942	0.344152	1.19551	0.78412	0.230306	-0.758413	0.499887	0.670902	0.320148	0.141859	-0.308905
TCGA-CR-7370	B2b	moderate	Yes	Yes	Negative	-0.955787	-1.01815	-0.406632	0.632008	-1.12451	-0.257151	-0.815105	-0.813114	-0.591387	-0.502005	0.27837	-1.96385	-0.724081	-0.874319	-2.23295	-1.94795	-0.604447	-1.62346	-0.931887	-1.00874	-0.864678	-2.18097	-0.967482	-1.66735	-0.23376	-0.108844	-0.67019	-1.42919	-0.682791	-0.65712	-2.00054	-1.25652	-1.09382	-2.08303	-0.901567	-0.463248	-1.47621	-0.332773	-1.88941	-0.687117	-0.327109	-0.6814	-0.530233	-1.38809
TCGA-CR-7371	B2b	moderate	Yes	No	Negative	-0.201766	-1.12241	-1.09934	0.288422	-0.0686348	-0.254603	-0.644463	0.00397614	-0.0930133	0.206269	0.0641034	0.0896014	0.0874127	-0.630886	-1.33055	-0.0831675	0.114662	0.103843	-0.868148	0.0546431	0.34306	-0.382428	-0.847322	-0.275758	-0.295606	0.220037	-0.67019	-0.694103	0.0846568	-0.710267	-0.511345	-0.0159061	-0.890671	-0.0737902	0.50074	0.152646	-0.946301	-0.211268	1.354	0.421032	0.544792	0.387413	-0.657855	-0.88933
TCGA-CR-7372	B1b	low	No	Yes	Negative	0.421186	0.489375	-0.651204	1.27973	1.26394	0.666739	0.866729	1.44554	1.00309	0.755365	0.557357	0.422778	0.628893	0.536002	0.614033	0.391844	0.87867	0.95972	0.688488	1.06836	0.498945	1.14389	0.406387	0.805616	-0.617216	0.403433	0.268211	1.2558	-0.196449	-0.557433	0.706144	0.23734	0.753686	0.629281	0.22994	1.03274	0.100804	1.78593	0.455298	0.382448	1.27248	0.955166	0.508609	0.737112
TCGA-CR-7373	A	low	Yes	No	Negative	0.532077	1.26215	1.12069	-0.0548999	0.311806	0.918418	0.581266	0.128102	0.844131	0.316968	0.389768	-0.476899	0.704731	0.739819	-0.322127	-0.47332	0.371088	1.31463	0.147598	0.340472	-0.105138	-0.106643	0.892442	0.110734	2.27601	0.880237	2.27963	1.62045	-0.0181607	1.82145	0.177834	0.107048	-0.606005	0.735682	0.616864	-0.545573	0.574686	0.077669	1.03178	0.104392	0.232643	0.444015	1.48381	-0.298638
TCGA-CR-7374	B2b	moderate	Yes	Yes	Negative	-1.26093	0.111117	-1.28155	-0.710914	-0.950579	-0.459092	-0.535251	-0.864365	-0.472972	-0.615518	-0.536603	-0.948283	-1.5205	-1.87517	-2.08093	-0.773278	-0.835317	0.567617	-1.84697	-1.13802	-1.58855	-0.9983	-0.193659	-1.16352	-0.880074	-0.0392551	-0.67019	0.0417828	-1.17708	-0.995348	-1.36993	-0.751171	-1.12439	-0.277981	0.358507	0.294763	-0.577746	-0.387154	-0.0242868	-0.715479	0.0599114	-0.281609	-0.2167	-0.89782
TCGA-CR-7376	B1b	moderate	Yes	Yes	Negative	-0.207883	0.573604	-1.42844	0.400004	0.149904	0.323317	0.0561577	-0.1417	0.410397	0.0971928	0.0844369	-0.0232058	0.222158	-0.0288064	-0.762928	-0.226369	-0.107095	0.340965	-0.187186	-0.307047	-0.361169	0.0140036	-0.263764	0.0598548	1.32226	-0.441759	-0.439384	0.490152	-0.638818	1.04805	0.0549025	0.234398	-0.105116	0.587378	0.90417	0.125192	-0.0108439	0.997833	-0.0474522	0.267309	0.298394	0.248656	-0.467054	-0.404669
TCGA-CR-7377	B1b	moderate	Yes	Yes	Negative	0.454696	-0.441055	-0.174039	0.779611	0.545735	0.500994	0.337452	0.84476	0.858645	0.483428	0.301889	0.272059	0.710949	0.624786	-0.0910638	0.206308	0.470345	0.603973	0.0835857	0.340714	-0.110263	0.456896	0.231904	0.269189	0.723593	-0.163187	0.77795	-0.0882215	0.00733514	0.855477	0.128973	-0.497444	-0.232721	0.687858	-0.651149	-0.239314	-1.49925	0.571906	-0.742566	-0.524768	0.924454	0.314399	-0.512767	-0.026742
TCGA-CR-7379	B1b	moderate	Yes	No	Negative	0.510145	1.02096	-0.337515	0.669701	0.931959	0.434854	0.561791	0.890232	-0.901215	0.657741	0.711311	-0.15398	0.503548	0.335135	0.158003	-0.426074	0.64519	0.765966	0.103048	0.0436639	0.314057	0.81682	-0.810915	-0.141669	-0.33365	-0.0594314	-0.190766	-0.0418175	0.0105302	-0.660886	-0.0651962	-0.587972	0.312549	0.320337	0.319856	-0.662971	0.333187	1.3591	1.54811	-0.657917	1.15	0.894532	0.259499	0.97609
TCGA-CR-7380	A	moderate	No	Yes	Negative	1.52636	1.67313	-0.301642	1.13279	1.04274	1.19289	0.628926	0.906593	1.11277	1.02955	1.1949	0.126483	0.320802	0.146889	0.192076	-0.210005	0.780045	1.04933	0.562855	-0.0666209	0.630048	0.883252	0.300502	0.685837	-0.0131375	0.0762708	-0.67019	1.48093	-0.131864	0.913646	0.234625	0.333473	0.612117	0.224565	0.820102	1.02846	0.709162	0.457929	1.40103	-0.594176	0.997775	1.26834	0.45047	0.372054
TCGA-CR-7382	A	moderate	No	Yes	Negative	-0.470012	0.033713	0.127073	-0.611257	-0.986805	-0.598063	-0.916068	-1.23904	0.575088	0.0267171	-0.989578	-1.24905	0.0733815	0.782108	-1.61768	-1.49833	-1.05802	-0.681206	-0.460012	-0.482901	-0.626833	-1.61025	-1.11683	0.0961713	1.35125	-0.758318	0.101146	-1.42919	0.185498	1.07273	-2.02803	-3.13285	-1.24057	-0.90304	-1.25764	0.111115	-1.66777	-0.0108306	0.516801	-0.0919142	-1.1167	1.00998	-0.885895	-0.456261
TCGA-CR-7383	B1b	moderate	Yes	Yes	Negative	-0.254933	0.966556	-1.14134	0.153456	-0.242907	0.305968	0.287889	-0.292522	-0.133078	-0.99319	-0.0611294	-0.00984109	-0.283852	0.663117	0.639416	0.0131033	0.017675	0.222259	-0.178255	-0.325265	-0.420246	-0.236856	0.336112	-0.987669	0.148254	0.315951	-0.67019	-1.30637	-1.17708	1.24709	-0.306782	-0.726999	0.715946	-0.814712	-0.66208	-0.380595	-0.75674	0.586181	0.72298	-1.01197	-1.17513	0.225376	0.267639	-0.192767
TCGA-CR-7385	B2a	low	Yes	Yes	Positive	-0.941004	-0.189337	0.0522905	0.738957	-0.592927	-0.906771	-1.5644	-0.163543	-1.61727	0.526197	-0.768489	0.782491	-0.271067	-2.06876	-0.209686	0.905648	-0.0856585	-1.26376	0.409583	0.307539	-0.321154	-0.343539	0.198345	0.503645	0.404674	0.708991	-0.67019	-1.42919	-0.184439	-0.15915	-0.0746351	1.01676	-0.171932	-0.31773	0.433659	-0.61588	-0.528078	0.43822	-1.28643	0.437396	-0.204354	-1.07939	1.34642	-1.06088
TCGA-CR-7386	B1b	moderate	Yes	Yes	Negative	0.500998	0.505309	-0.93716	0.664278	1.14564	0.859149	0.887208	1.11171	1.33065	0.584464	0.657413	0.396929	-0.00627111	-0.261682	0.272718	0.404787	1.10052	0.929449	0.976792	-0.360598	0.203581	1.13685	-0.395584	0.367031	1.21224	0.290887	-0.67019	0.643349	-0.336407	1.63748	0.913484	0.686791	0.820835	0.25262	0.777152	1.07395	1.20187	1.31463	-0.57169	-0.542367	-0.468408	0.953905	-0.108958	1.5328
TCGA-CR-7388	B2b	high	Yes	Yes	Negative	-0.0503915	-0.314157	-0.0482917	-0.594331	0.189803	0.310271	0.0358671	0.275146	-0.423524	0.197851	0.23734	0.275104	0.0253963	-0.67212	-0.204135	0.270504	0.313484	-0.0160345	-0.168237	-0.196614	-0.275967	-0.192436	-0.384822	0.178586	-0.404643	0.174662	-0.292185	-0.827062	-0.223421	-0.391827	-0.0300143	0.526133	0.0915345	0.381445	0.389868	-0.0783591	-0.372553	0.205354	1.40052	0.68329	0.438062	-0.326085	0.0522491	0.137854
TCGA-CR-7389	B1b	high	Yes	Yes	Negative	0.327559	0.528528	-0.0522328	0.721502	0.482012	0.139999	0.29436	0.72147	0.598572	1.11924	0.46702	0.618054	0.583708	0.386841	-0.0873301	0.423131	0.561238	-0.079247	-0.234314	0.396407	-0.579446	0.589744	0.489059	1.03794	0.205553	1.41502	0.604163	0.676282	0.504872	-0.931411	0.997518	0.46751	0.240484	0.452337	0.0933518	0.510072	-1.29643	1.02154	0.117767	0.130245	0.241215	-0.600155	0.597766	-0.352142
TCGA-CR-7390	B1b	moderate	Yes	Yes	Negative	0.688693	0.170319	-0.478332	0.0991988	0.326874	0.744882	0.311024	0.0629887	-0.252113	0.574903	0.725077	0.275853	0.52584	0.122294	0.210628	0.0997977	0.146924	0.808282	0.756185	0.72084	0.100663	0.359648	0.563985	0.0367828	-1.38732	-0.714595	-0.67019	-0.536232	-0.729678	-1.74896	0.0976038	-0.380952	-0.455014	0.423542	1.05638	0.329215	0.602074	-0.414085	0.602957	0.562534	1.25422	0.4875	0.2391	-0.230527
TCGA-CR-7391	B1b	moderate	Yes	Yes	Negative	0.928406	0.245626	1.03007	1.16159	1.51231	0.607672	0.738086	1.74552	0.705352	1.35828	0.687499	1.11032	0.117908	0.162454	0.177538	1.03356	1.53893	0.374447	-0.0502429	0.272262	1.53109	1.0872	0.113149	1.50666	0.168355	0.817075	-0.67019	-0.0879882	0.147453	-0.068571	1.22935	0.526632	0.312985	0.863842	0.504742	0.812885	0.58482	1.24218	0.822076	-0.293495	0.965485	0.227404	-0.0557971	-0.514288
TCGA-CR-7392	B1b	moderate	Yes	No	Negative	0.620595	0.335878	-0.266138	0.707613	0.343503	0.326321	0.330449	0.327589	1.11822	0.12382	0.741636	0.201223	0.0884764	-0.19466	0.0523366	0.160143	0.144431	0.854477	0.44723	-0.314436	-0.282266	0.463115	-1.38556	1.32711	1.28706	0.0677347	3.59816	1.43108	0.510857	1.19727	0.543948	0.636386	-0.114164	1.30845	0.505663	0.973426	0.175646	0.803583	1.58299	-0.0140496	0.931392	0.67254	-0.220243	0.651369
TCGA-CR-7393	B1b	low	No	Yes	Negative	0.643199	1.27601	0.511589	0.876483	0.851813	0.293162	0.252439	1.21481	0.851261	0.980516	0.375277	0.788512	-0.0454796	-0.571681	0.323166	0.811422	0.927218	0.648261	0.2185	0.271378	1.02287	0.644776	0.244836	0.433338	0.223334	0.655045	-0.277787	0.434761	0.641736	0.145701	1.56094	0.224278	-0.0768235	0.726412	0.185859	0.737738	0.345819	0.901454	0.422166	-0.560189	0.704584	0.0627874	1.42199	0.248793
TCGA-CR-7394	A	low	Yes	No	Negative	1.20339	0.579065	0.672223	0.867298	1.36522	0.848659	0.616535	1.33974	0.851354	0.84536	0.993444	0.823776	0.354579	0.469689	0.816352	0.66368	0.929686	0.960286	0.123715	0.430144	0.257123	0.870053	0.450786	1.51733	1.32527	0.703588	-0.264234	0.84495	0.45418	1.26961	1.17353	0.48549	0.326901	1.228	0.80315	0.49001	-0.29326	1.24328	-0.0589984	0.902022	1.5479	0.293919	-0.418981	0.622436
TCGA-CR-7395	A	low	Yes	Yes	Negative	1.13733	1.05934	1.04259	1.28943	1.14237	0.885562	0.828323	1.19773	1.11296	0.771757	1.07116	0.568822	-0.0323505	0.445832	1.02299	0.640094	0.787243	1.28415	0.317438	-0.211103	0.743955	0.705022	0.179832	0.982236	1.21363	-0.441589	-0.226815	1.46794	0.53897	1.07525	0.887851	0.559166	0.411069	0.660373	0.397984	-0.369276	0.693226	1.59225	0.532985	0.330803	1.14654	1.36304	-0.130534	0.443377
TCGA-CR-7397	B1b	moderate	Yes	Yes	Negative	0.64728	-0.0233107	0.367846	0.941515	0.600605	0.640663	-0.0227609	0.955648	0.506217	0.58045	0.257621	0.805274	0.281877	-0.174682	0.22578	0.738721	0.834285	0.25476	0.389871	0.372636	0.971123	0.349202	-0.560725	0.727076	-0.238304	-0.115501	-0.67019	0.408149	-0.0795274	0.0829947	0.68048	0.404498	0.0415963	0.437776	-0.273532	0.10183	-1.1072	0.846848	-0.126841	-0.33178	0.774336	0.1272	-0.336764	1.50031
TCGA-CR-7398	B2b	moderate	Yes	Yes	Negative	-2.22538	-2.06087	-0.77014	-1.08019	-1.36777	-2.26559	-1.13847	-0.958074	-1.59386	-0.896444	-1.20412	-2.08027	-1.23651	-2.06721	-1.52747	-2.60156	-0.631924	-0.996637	-1.54246	-1.98667	-0.62979	-0.553036	-1.86188	-1.41667	-0.987111	-1.06524	-0.67019	-0.678278	0.00693266	-0.273933	-0.55358	-2.71854	-1.13219	-1.29669	-0.125522	-0.811207	-0.160497	0.301433	-0.0947605	-0.671301	-0.615927	0.0159064	-2.06398	-0.861571
TCGA-CR-7399	B2a	high	Yes	Yes	Negative	-1.23767	-2.79291	-3.23369	-1.21435	-1.56049	-0.931549	-2.90467	-1.50344	-0.845688	-1.75053	-1.16322	-1.2711	-2.10533	-0.538078	-2.03968	-1.10775	-1.46403	-1.72686	-1.49937	-1.90748	-2.34028	-0.887894	-2.97997	-1.46928	0.286244	-2.49457	-0.67019	0.627251	-1.17708	-0.168207	-1.08829	-0.865993	-2.2569	-0.403782	-0.184383	-1.76066	-1.78202	-0.456742	-0.877101	0.215626	-1.00944	-1.89139	-1.91357	0.109504
TCGA-CR-7401	B1b	moderate	Yes	Yes	Negative	0.726155	0.859797	-0.170367	0.453618	1.49262	0.763954	1.06451	1.39051	1.15944	0.633955	0.667805	0.651563	0.359519	0.476733	0.686227	0.644654	1.23229	0.483378	0.404112	0.300747	0.531618	1.16299	0.545595	0.63401	-0.261998	0.706059	0.449471	0.667319	-0.464279	0.221127	1.38534	0.657218	0.576251	0.750986	0.604825	0.817103	1.32498	1.12867	0.704191	0.7191	0.729136	0.611584	0.428478	0.0681294
TCGA-CR-7402	B1a	moderate	Yes	Yes	Negative	-0.232596	-0.695187	-0.741249	0.238763	0.00839724	-0.51543	0.285264	0.231021	-0.191442	-0.788139	-0.520806	-0.493836	-0.633888	-0.890474	-0.386749	-0.393039	-0.188812	-0.668423	-1.1336	-0.58993	-0.819375	-0.163491	-1.13826	0.262635	-0.947393	-0.266977	-0.313137	-0.509857	-0.0815421	-0.884219	-0.112255	-0.538192	-0.964789	-0.231878	-0.704038	-0.625486	-0.742797	-0.676636	-0.493873	-0.556577	0.330089	-0.699256	-0.0702537	-0.90835
TCGA-CR-7404	B2a	moderate	No	Yes	Positive	-1.06169	-0.494078	-0.107569	-0.0158452	-0.765666	-0.503279	-0.875756	-0.732468	-0.202723	-0.249056	-0.854968	0.0615054	0.0867526	-0.961186	-0.580557	0.219737	-0.595998	0.691732	0.464146	0.212299	-0.573736	-0.989227	0.220234	-0.0283006	0.581867	-0.562208	-0.67019	-1.2339	-0.0537382	0.029907	0.0857265	0.136438	0.14686	-0.646484	0.588152	0.349301	-0.461545	0.101541	-0.23679	0.203504	-0.274596	-0.523852	0.49442	0.118236
TCGA-CV-5430	B1b	moderate	Yes	Yes	Negative	-0.864238	-0.742313	-1.67567	0.103308	-2.73176	-0.501772	-3.77954	-2.64259	-0.738135	-1.20783	-1.36094	0.104555	0.633716	-2.59661	-1.91991	-0.384839	-3.86939	-0.0272969	0.0646147	0.570992	-0.647122	-2.234	-0.861419	-1.95059	-0.164549	-1.27292	-0.67019	0.213076	-0.348409	-0.0473727	-2.00462	-0.303897	0.829492	-1.28146	0.0547621	0.416196	-1.25389	-0.0351522	-0.672179	0.631716	-0.804325	-1.28406	-0.435638	-0.773483
TCGA-CV-5431	B2a	moderate	Yes	Yes	Negative	-0.0660312	-0.419194	-1.01821	-0.666058	-0.690003	-0.29265	-0.124349	-1.07828	-0.997688	-2.39239	0.102422	-0.603261	-1.09067	-2.1996	-0.714656	-0.353114	-1.07352	-1.11788	-1.28477	-0.882692	-2.26991	-1.00285	-2.13589	-1.96423	0.186254	-2.45763	-0.32166	0.592744	-1.17708	0.0498196	-1.29772	0.134025	-2.51457	-0.358482	1.00307	-1.68841	-0.888833	-0.49217	-0.753672	-1.2268	-0.0921378	-0.769067	0.371997	0.760342
TCGA-CV-5432	B1b	high	Yes		Negative	0.0713788	-0.0502644	-0.519128	0.931508	0.675719	0.554062	0.51655	0.716265	-2.30183	-0.576494	0.335214	0.0860318	0.0969784	0.33349	0.0250651	0.0795537	0.487741	0.384974	-0.0196889	0.561348	-0.564473	0.761977	0.748885	-1.06696	-0.527979	0.334917	-0.67019	-0.575014	-0.0834245	-1.39667	-1.13577	-0.208792	0.536944	-0.698838	-0.510042	0.991072	0.00570989	0.115704	0.0247879	-0.51125	0.490752	-0.746449	-0.697398	-0.648164
TCGA-CV-5434	B2b	moderate	Yes	No	Negative	-1.26664	-1.10837	-1.52818	-2.26713	0.22816	-0.212918	-0.516062	0.0473932	-1.26705	-0.14005	-0.362471	-2.17527	-2.99999	-0.732248	-1.0663	-2.2869	0.283204	-1.96553	-1.21727	-2.80139	-1.54732	-0.565177	-0.43234	-1.83722	-0.37358	-0.842459	-0.67019	-1.42919	-1.17708	-0.342021	-2.06781	-3.33298	-0.447724	-1.4085	-0.119253	-0.492661	-1.53262	-0.240626	-1.20788	-1.06127	-0.539291	-0.748871	-1.0016	-1.88412
TCGA-CV-5435	B2b	moderate	Yes	Yes	Negative	0.0358596	-0.936662	-1.32155	-0.676279	-0.747207	-0.90277	-1.05136	-0.589291	-1.96689	-1.44516	0.42724	-2.97308	-1.98238	0.623216	-0.763924	-3.219	-0.329696	-0.294583	-0.784731	-2.02724	-0.760405	-0.846216	-1.62972	-1.34185	-1.04922	-0.706294	-0.67019	-0.954157	-1.17708	-1.37583	-1.48425	-3.71512	-1.20212	-0.641014	-0.257636	-2.1824	-1.61817	-1.10054	-0.932643	-2.44962	-2.07252	-0.2597	-1.34953	-1.54279
TCGA-CV-5436	B1b	high	Yes	Yes	Negative	0.6937	1.14654	-0.369618	-1.53471	0.523163	0.474794	0.888635	0.620582	0.142577	1.0174	0.698736	-0.341815	0.451933	0.628174	0.783081	-0.646276	0.465241	0.492718	-1.38803	-0.610045	-0.10881	0.517722	0.518485	-1.16547	-0.689293	-0.213742	-0.67019	-0.785732	-1.17708	0.350162	-0.317015	-0.47343	0.383146	-0.132412	0.410862	-1.18639	-1.3258	0.686337	-0.418143	0.00327493	-0.393929	0.593388	1.13147	-0.663234
TCGA-CV-5439	A	low	Yes	Yes	Negative	0.768631	1.1867	0.509896	1.53938	0.799128	1.06354	0.887272	0.916761	1.05576	0.617933	1.09332	0.556672	1.04838	-0.251283	0.46052	0.479409	0.879283	0.749325	0.655739	0.602895	0.706875	0.934206	1.05209	0.0873965	0.828273	1.3029	0.270404	1.25225	1.74058	0.848795	1.08723	0.899493	1.04884	-0.263115	0.86188	1.21474	0.396568	1.37781	0.739733	0.607346	1.28674	0.725382	0.863692	0.0411528
TCGA-CV-5440	B1b	high	Yes	Yes	Negative	-0.0717949	-1.05483	-0.369738	-0.0401137	-0.012466	0.676232	0.0831067	-0.475249	-2.14822	-0.531451	0.321791	-0.198403	0.895516	-0.890577	-0.890162	-0.420038	0.0134015	0.705978	-0.0967634	0.74421	-0.656497	0.13966	-0.325505	-0.832845	-0.0450618	-1.29533	-0.67019	-0.59866	-0.598681	-0.596472	-1.0186	-0.144547	0.233099	-0.376147	0.404601	0.615735	0.549301	-1.02749	1.07029	0.0876837	-0.4282	0.939598	-0.25337	-1.4799
TCGA-CV-5441	B1a	high	Yes	Yes	Negative	0.54431	-2.2735	-1.01207	1.15404	0.194392	-1.1628	0.640812	0.289199	-2.62294	0.633733	0.310872	-0.446929	0.562132	0.100526	0.908808	-0.623097	0.173344	-2.067	-0.00918514	-0.0481594	-0.193943	0.483308	0.749783	1.1224	-0.754988	-1.80422	-0.356783	1.22921	0.847617	-1.2479	0.0803313	0.129891	-0.978954	-1.2474	-0.844579	-0.235887	-0.933395	-2.0089	1.52423	-0.664147	0.943158	0.895789	-3.50313	-1.67245
TCGA-CV-5442	A	low	Yes	No	Positive	1.26503	1.34157	1.83367	1.40794	0.951599	0.65348	0.806908	1.47943	-0.0103701	0.469184	0.968566	0.930474	-0.132225	0.360542	1.00876	0.83793	1.00668	0.489829	0.353132	0.220644	0.760942	1.09206	0.5125	1.61676	-3.20035	0.174584	0.751751	1.43962	0.813182	-3.31471	1.08772	0.711414	0.590532	0.569112	0.632167	-0.340913	-0.220348	1.36659	1.48767	0.587673	1.00581	-0.278006	0.90981	-0.351706
TCGA-CV-5443	B2a	low	Yes	Yes	Positive	-1.58502	-1.14692	-1.04294	-1.31194	-1.01903	-0.877909	-1.81319	-1.43637	-1.91573	-2.41605	-3.07362	-0.446289	-1.65867	-1.68287	-0.95715	-0.539447	-1.34159	-2.02334	-1.37449	-1.19633	-1.14609	-1.40866	-2.22664	-0.318248	-0.339671	-2.42344	-0.67019	-1.0228	-1.17708	-0.762088	-0.997741	-0.399582	-3.28465	-1.3326	-0.817613	-2.20124	-1.99717	-1.1234	-1.11334	-0.00477816	-1.17592	-1.70401	-0.371506	-0.924845
TCGA-CV-5444	B1b	moderate	Yes	Yes	Negative	0.0907873	-0.194347	-0.22277	0.701694	-0.155243	0.496549	0.191062	-0.0677766	0.798366	0.232241	0.402933	-0.516155	0.043325	0.223125	-0.685005	-0.63374	0.0883359	0.160206	0.490861	-0.956814	-0.0843554	0.231714	0.432769	-0.36095	0.966738	0.183366	1.85148	-0.189358	-1.17708	0.793515	0.209134	0.222222	0.301128	-0.551382	-0.409905	0.370904	1.23329	0.466652	-0.947387	-1.15012	-0.217005	0.153287	0.689863	0.146998
TCGA-CV-5966	A	moderate	Yes	Yes	Negative	-1.3673	0.816622	0.130242	-0.858097	-1.63721	0.122214	-0.25295	-1.27576	0.337784	0.046045	-1.86183	-2.04952	0.388108	1.13954	0.17827	-2.41315	-0.858286	0.345556	-0.0915854	-0.0482704	-0.156437	-2.13186	-0.670111	-1.23335	1.33907	1.59509	3.42048	-1.42919	-1.17708	1.23709	-0.580434	-2.2235	-1.18027	0.28363	-1.52714	-2.29467	-0.286577	-0.715286	-0.65349	-0.932912	-1.2243	0.487737	0.841299	0.0896449
TCGA-CV-5970	B1b	moderate	Yes	Yes	Negative	0.808101	0.406723	-0.0786135	1.15356	1.1397	1.12858	0.748575	0.978844	1.25705	0.821853	1.06656	1.09843	0.806965	0.548069	0.979469	0.919482	0.939584	0.774758	0.762462	0.50095	-0.285311	0.922071	0.82817	1.49187	0.534292	0.990096	-0.337729	1.45798	0.637535	0.227063	1.12306	1.10566	0.618899	0.641138	1.34252	0.926992	0.2828	1.2704	1.18374	0.718251	1.22127	0.22433	1.15329	0.735185
TCGA-CV-5971	B1b	high	Yes	Yes	Positive	-0.890454	-0.505466	-1.48523	-0.584517	-1.56848	-0.208133	-0.863704	-1.67062	-0.142859	-1.49197	-0.819925	-0.766562	-0.689003	-0.84987	-1.55308	-0.599064	-1.98236	-0.233787	-1.27434	-0.75222	-2.30118	-1.57457	-1.50165	-0.686529	-0.355533	-1.70394	-0.0713546	-0.97014	-1.17708	-0.420244	-1.06358	-0.344992	-0.838417	0.010369	-1.29657	-0.461163	-1.24413	-0.327706	0.444453	-0.573208	-0.69981	0.240185	0.0805801	-1.52532
TCGA-CV-5973	A	low	No	No	Negative	1.22885	-0.655625	1.13275	1.19076	0.696286	0.70196	0.901786	0.941724	0.664398	0.0750892	0.873446	1.18096	0.796419	1.31701	1.86434	1.73917	0.861912	0.388053	0.605719	1.67192	0.5525	1.22336	-0.50946	0.980469	-0.854053	1.49564	2.25654	0.708576	1.67609	-0.675052	1.39467	1.39314	1.10176	1.84692	-0.083719	1.751	2.04062	0.0185693	1.38613	0.981262	0.168868	-0.484133	-0.110022	1.0118
TCGA-CV-5976	A	moderate	Yes	Yes	Negative	0.153926	0.173881	-0.258618	-0.40151	0.0594222	0.407926	0.0560542	-0.205346	0.982669	-0.159132	0.411155	-0.02971	0.691309	0.821944	0.0429418	0.0843496	0.123639	0.636564	1.02978	0.451103	0.761349	0.40002	0.153721	-0.160012	0.267594	-0.238771	-0.243761	0.462595	1.27261	-0.239228	-0.2473	-0.401058	0.798175	-0.235688	-0.286817	0.423545	0.956359	-1.15977	0.028923	-1.11615	-0.524977	0.951726	-0.364976	1.38305
TCGA-CV-5977	A	low	Yes	Yes	Negative	0.168555	1.25049	-0.477358	0.358391	0.570366	0.988291	0.808867	0.545354	-0.542384	0.714112	0.246004	-0.100664	1.16843	1.39733	0.903196	-0.0283126	0.529704	0.501207	-0.107422	0.646322	-0.178387	0.475303	0.717777	-0.0411717	1.28046	0.713032	1.47555	0.244066	-0.797221	0.613736	0.47154	-0.000791345	0.977974	0.324409	0.784344	-0.219319	1.04553	0.712047	1.09482	0.0912261	0.0424252	0.407515	0.92238	0.400765
TCGA-CV-5978	B2b	high	Yes	Yes	Negative	-1.08661	-1.43839	-1.06815	-2.59591	-0.271621	-0.71811	-1.44883	-0.36562	-0.838166	-0.101945	-0.445137	-1.42044	-1.72048	-0.386693	-0.990465	-1.25322	-0.181556	-1.06309	-0.575771	-1.67114	-2.24496	-0.982849	-1.58513	-1.33568	-0.549382	-0.755204	-0.67019	-1.11618	-1.17708	-0.254214	-1.96531	-1.60539	-0.446377	-0.0418039	-0.770313	-1.96708	-1.84741	0.238869	-0.818074	-0.348792	-0.280796	-0.322273	-1.5023	-1.79416
TCGA-CV-5979	A	moderate	No	Yes	Negative	0.28377	0.702805	0.389576	-0.955796	0.573856	0.293984	0.833936	0.446834	0.945637	0.495631	0.264977	0.0171466	0.610684	0.439349	0.531516	0.0156352	0.331868	0.704537	0.926864	0.232942	0.246431	0.633052	0.30438	-0.407337	0.183967	0.295549	-0.354453	1.25717	0.129083	0.933901	1.20049	0.0926397	0.141329	1.37402	0.508738	0.637084	1.93637	-1.14409	0.72906	-2.2767	-0.293012	0.904282	0.835728	0.383308
TCGA-CV-6003	A	moderate	No	Yes	Negative	0.181071	0.0343721	-0.380345	-0.988903	0.207804	0.184623	0.734387	0.293265	0.69205	-0.664208	0.186769	-0.469271	0.934009	0.521762	0.74211	-0.409055	0.370393	0.706257	0.124556	0.276901	-0.580738	0.067072	-0.060592	-0.178747	0.564628	0.77901	0.915447	0.0820876	0.922897	-0.0939805	0.0741021	0.344945	-0.330272	1.47504	-0.513624	-0.0256508	1.31747	-0.529698	0.286528	1.11249	-0.341549	0.256663	0.328932	1.61668
TCGA-CV-6433	B2a	moderate	Yes	Yes	Positive	-2.11317	-0.754135	-0.447423	-0.904453	-2.28893	-1.16414	-3.06635	-2.15655	-1.9178	-1.29753	-3.08315	-1.23402	-2.26787	-0.0425975	-1.17188	-1.03361	-1.96936	-2.08891	-1.87533	-1.22304	-2.41165	-2.7026	-2.54324	0.172357	0.759616	-1.15265	-0.67019	-1.19064	-1.17708	0.541466	-1.55345	0.308655	-2.56666	-1.91938	-0.984712	-2.69565	-2.3087	-1.13703	-2.4385	-0.690947	-0.55059	-1.82557	0.911963	0.30167
TCGA-CV-6436	A	low	Yes	No	Negative	0.918517	0.32399	1.04567	1.32788	1.13547	0.88411	1.26741	1.66761	0.778258	0.907334	0.743808	1.23238	0.222823	1.28128	2.17962	1.88089	0.889515	0.0397969	-0.646428	1.4027	0.911889	1.31652	0.604801	2.04139	0.845985	1.39845	0.936786	0.113285	1.18443	0.273649	1.40159	0.940938	0.956469	0.500723	-0.390569	1.58134	1.73202	0.5941	1.5968	0.101321	0.00263808	0.326906	0.0751529	0.788409
TCGA-CV-6441	B1a	moderate	Yes	Yes	Negative	-1.66742	-0.518454	-0.875773	0.538152	-1.92276	-2.98384	-0.849628	-1.37293	-3.55928	-1.54452	-1.41425	-0.532877	0.658088	-0.915062	-1.53223	-0.984554	-1.07572	-2.27518	-1.3661	-0.795713	0.606018	-3.0673	-0.787649	-0.277594	-0.486466	-1.70021	-0.67019	-1.28548	-1.17708	-0.0739313	-1.74658	-0.0971915	-2.77118	-1.127	-3.32745	-0.998166	-0.81357	-2.15658	-1.5573	-0.641415	-1.78588	-2.17311	0.693449	-0.421029
TCGA-CV-6933	B1b	high	Yes	Yes	Negative	0.73035	-0.561488	-0.819889	-0.466081	0.57473	0.533203	0.201377	0.0937673	-0.330311	0.43373	0.983961	0.323702	0.10058	-0.147679	0.0259031	0.401883	0.198237	-0.12248	-0.314796	0.711121	-0.784694	0.198049	-0.00765831	-0.34358	-0.767604	-1.26946	-0.67019	0.171345	0.347953	-0.330554	-0.915211	0.146481	0.126135	0.064885	0.711328	0.245499	-0.993278	0.299447	-0.731662	0.26132	0.547887	-1.19604	-0.196029	-1.18673
TCGA-CV-6934	B1b	moderate	Yes	No	Negative	-0.400126	-0.0111791	-1.20397	-0.761567	-0.162189	0.117012	0.155251	-0.13892	-0.166235	0.0621483	-0.365386	-1.34465	0.207724	-0.615841	-0.315061	-1.12465	-0.195074	0.301102	0.708793	0.534907	-0.690543	0.0650881	-0.600975	-1.22358	0.439953	-0.0264115	0.0382503	0.2819	-0.984796	0.667666	-0.436998	-1.34379	0.337892	0.139143	-0.231412	0.244181	0.658257	0.88915	-0.112966	-0.324148	0.100002	0.709032	-0.54997	-0.805515
TCGA-CV-6935	B2b	moderate	Yes	Yes	Negative	-0.393702	0.359297	-1.04409	-0.19892	0.58899	0.0201472	0.232609	0.769322	-0.351218	-1.42425	0.370043	-1.97962	-1.88118	0.262709	0.328611	-1.8293	1.2531	-1.75174	-0.050888	-2.80139	-0.221937	1.18526	-2.98555	-1.54678	-1.53161	-0.791447	-0.67019	-0.987199	-1.17708	-1.33675	-0.326404	-2.47667	1.21724	-1.63889	0.139593	-0.319792	-1.94053	-0.461612	-1.74074	-1.17026	-2.03749	-0.117255	-0.395247	-0.888783
TCGA-CV-6936	A	low	Yes	Yes	Negative	0.406466	1.33915	0.354266	0.663543	-0.758883	0.765881	-1.55361	-0.916214	-1.12935	-0.103995	0.395966	1.14912	0.737595	0.313739	-0.215011	1.10094	-0.843643	0.488258	-0.376162	0.406449	0.920718	-0.598985	0.256456	-0.234048	0.513349	1.3746	-0.67019	1.31312	-0.548067	0.394968	-0.355631	0.116694	1.00417	0.480751	0.623119	0.466398	0.306508	0.0265063	0.338749	-0.527927	0.789824	0.0987834	-1.28216	-1.07649
TCGA-CV-6937	B2b	high	Yes	No	Negative	0.287029	-0.806399	-0.166096	-0.165446	-0.510726	0.395966	-0.287689	-0.240066	0.341209	-2.0915	0.0303526	0.229138	0.245085	-0.144189	-0.803929	0.138193	0.288431	0.134497	0.306597	0.703839	0.578677	0.246089	0.0118319	-0.229492	-1.3248	-0.416815	-0.67019	0.400129	0.184479	-0.917937	0.234743	0.961063	0.600271	-1.64655	-1.02259	-0.595239	0.854544	-0.308866	2.1524	-0.660179	0.0058438	-0.0580507	-1.33882	-0.207858
TCGA-CV-6938	A	low	Yes	No	Negative	0.621043	1.01798	0.350805	1.15267	0.304234	0.857722	0.305934	0.244743	1.01524	1.28555	0.351754	0.254294	0.511942	0.587719	0.430351	0.286594	0.245996	0.113837	0.389048	-0.149985	0.611987	0.328026	0.289214	0.599436	1.62571	0.671097	0.257319	1.05108	0.592977	1.70519	-0.377009	0.727958	0.0056609	0.0562132	0.801907	0.882341	0.713423	0.269409	0.814524	0.550475	0.495171	1.08086	-0.753581	0.311423
TCGA-CV-6939	B2a	moderate	No	No	Negative	-1.18563	-0.666603	-0.43353	0.606072	-1.54687	-0.426463	-1.89416	-1.25039	-0.404087	-0.474258	-1.59781	-1.4033	-0.513167	-1.53081	-1.27653	-1.39745	-1.13075	-1.81931	-0.361613	-1.26469	-0.936832	-1.82472	-0.669144	-0.378682	-0.0237714	-0.593458	-0.256926	-0.282205	-0.778205	-0.405051	-1.00049	-1.09138	-0.691482	-0.904453	0.696841	-1.3358	-0.788808	-0.954266	-0.493097	0.464433	-1.71576	-1.22464	0.186531	0.468604
TCGA-CV-6940	B1b	moderate	Yes	No	Negative	0.402678	-0.373739	-0.44263	-0.0701308	0.16354	0.0975612	0.073015	0.300502	-0.0447621	-0.103139	0.291177	0.497715	-0.185489	0.427385	-0.0747652	0.367538	0.139627	0.546351	-0.352977	0.166989	0.191817	0.00979813	-0.882503	-0.465044	-1.20038	-0.319903	-0.67019	-0.37928	-0.188557	-1.59378	-0.0293581	0.41312	0.106851	0.338038	-0.426434	-0.215721	-1.10447	0.227392	-1.24191	-0.38879	0.356314	-1.05478	-0.435542	-0.5974
TCGA-CV-6941	B1a	high	Yes	Yes	Negative	-0.394556	-1.20836	-0.439517	0.457018	-0.100007	-1.67688	0.255146	-0.516689	-0.892051	-0.678862	-0.83616	-0.709478	-0.117863	-0.371861	-0.617812	-1.00296	-0.214655	-1.22307	-1.03	0.442127	0.511477	0.0566929	0.600222	0.0417561	-0.486775	-1.86132	-0.396863	0.507711	-0.427177	0.257576	-0.290373	-0.422285	-0.524261	0.0231355	-0.196314	0.469765	-0.848636	-0.901148	-0.967056	0.412097	0.718551	-1.81252	-2.77777	-1.72016
TCGA-CV-6942	B1b	low	No	No	Negative	-0.246324	0.426669	0.519702	-0.619472	0.141252	0.0550078	0.860765	0.194984	0.417531	0.186294	0.0409701	-0.530615	0.319656	0.831867	0.505391	-0.148949	0.287263	0.698191	-0.221509	0.545908	-0.747039	0.0141662	1.00615	-1.1523	1.62451	0.311359	0.666456	-0.355515	-0.49354	0.837577	-0.222468	-0.505729	-0.00457875	0.294063	-0.293799	-0.640505	0.389707	-0.0340082	0.359356	0.0802481	-1.28759	0.432188	0.616121	0.665714
TCGA-CV-6943	B1b	moderate	Yes	Yes	Negative	0.457819	0.748558	-0.186155	0.700458	0.928109	0.574767	0.750949	1.0965	0.320147	0.370784	0.35105	0.619796	0.590206	-0.0365034	0.0966256	0.571091	1.00048	0.910752	0.427349	0.398214	0.167611	0.931283	0.658556	0.523506	1.62448	0.376314	-0.00263855	-0.0772537	0.841067	1.40709	1.14575	0.868442	0.789214	0.719184	0.941772	1.13168	0.911298	0.975422	0.744352	1.05424	0.727842	0.938988	0.321671	0.565044
TCGA-CV-6945	B1b	high	Yes	Yes	Negative	1.06099	0.349875	1.11087	-0.603497	0.865468	1.30447	0.638561	0.847401	0.794229	0.202924	0.734078	0.788304	0.800366	1.30125	0.867993	0.846585	1.1593	0.3893	0.707292	1.73276	1.18795	0.914713	-0.204933	-0.325065	-0.906025	0.948682	0.552598	0.46431	1.35517	-2.06782	0.774323	0.65859	1.70659	0.624094	-0.268112	0.12931	1.08187	-0.075883	0.259614	-1.31353	0.379227	0.3567	0.565716	1.30876
TCGA-CV-6948	B2b	high		No	Negative	-1.63153	-1.40194	-1.25141	0.0069014	-1.01362	-1.31905	-0.119615	-0.471087	-0.039013	-1.87312	-0.897233	-1.07816	-1.25287	-2.65966	-1.70782	-1.47816	-0.402848	-0.706538	-2.002	-1.32317	-3.21714	-0.828592	-1.67357	-2.15764	-0.301318	-1.40349	-0.67019	-0.892737	-1.17708	-1.13268	-1.37591	-1.25796	0.0117015	-1.13783	-0.977501	0.151	-1.17855	-0.760192	-0.775675	-1.01251	-1.53381	-0.769244	-0.700845	-0.369487
TCGA-CV-6950	B1b	high	Yes	Yes	Negative	-0.0600429	0.166604	-0.88886	-1.05812	0.300487	0.029656	0.642091	-0.0499409	0.604254	-0.138759	-0.248882	-1.54322	0.418342	0.606344	0.0416788	-1.34914	0.205797	0.487977	0.413083	0.307833	-0.745954	0.234564	0.325686	-0.25883	0.283209	-0.618067	1.04777	1.02364	-0.829515	0.281204	-0.192343	-1.84963	-0.421371	0.838011	-0.565943	0.727341	-1.42401	-1.68395	-0.364359	-0.685009	-0.915958	0.607617	0.0143625	0.211044
TCGA-CV-6951	B1b	high	Yes	Yes	Negative	0.107214	-0.0308763	-0.85042	-0.0961341	0.144871	-0.293231	0.259808	-0.328668	-0.135061	-0.385278	0.149096	0.259602	0.773768	-0.360634	0.443068	0.277233	-0.0523157	0.301237	0.205517	0.944662	0.829478	0.459718	0.451478	-1.37444	-1.25669	-1.56505	-0.67019	-0.141235	-1.17708	-2.19291	-0.315575	0.571752	0.217068	-0.535861	-0.00995699	-0.00173337	-0.594599	-0.170026	-0.685658	0.213975	-0.237791	-1.33745	-1.25069	-0.356515
TCGA-CV-6952	A	low	Yes	Yes	Negative	1.19575	1.55677	0.133232	1.34544	1.29678	1.09823	0.869725	1.17385	1.22077	1.55417	1.17386	0.800466	0.717809	0.956761	1.19721	0.793449	0.985118	0.96537	1.14877	0.128066	0.36076	0.906809	1.38141	1.44299	1.32902	0.896979	0.913822	0.59828	1.1756	1.41343	1.40088	0.598722	0.970647	1.0809	1.25496	1.12517	0.898826	0.918501	0.277919	1.21013	1.11696	1.04032	1.02581	0.81894
TCGA-CV-6953	A	low	No	No	Negative	1.6791	1.48196	1.45309	0.846108	1.14662	1.04428	0.667092	1.39573	1.05961	1.23198	1.40424	1.32732	1.20784	0.983402	1.28392	1.21753	1.24232	0.907883	0.708099	1.96222	1.77466	1.08208	1.00584	2.03226	-1.33809	0.348931	-0.67019	1.595	1.95917	-1.38249	0.637424	1.18667	1.15874	1.03615	0.00164344	0.37544	0.946058	1.31525	1.52809	1.12274	1.30716	0.647686	1.28461	1.07804
TCGA-CV-6954	B1a	moderate	Yes	Yes	Negative	-0.183343	0.649626	-0.532262	0.408127	0.44511	0.355146	0.39766	0.26128	1.63176	-1.09723	-0.199292	0.19302	-0.351071	0.109855	0.238777	0.40725	0.189269	-0.493887	1.14144	-1.00993	0.0411036	0.580917	0.667088	1.6545	1.40474	-1.667	-0.67019	1.75247	0.828152	0.975537	1.47913	0.586373	1.01868	-1.02746	-0.142324	1.96784	0.727434	1.3425	-1.46762	-0.848562	0.35023	0.21539	0.209631	1.71991
TCGA-CV-6955	A	low	No	No	Negative	1.34503	1.10385	1.24102	0.995147	1.19182	0.760272	0.410532	1.43794	0.999002	1.20225	1.00999	1.57005	0.399317	0.295887	1.52296	1.62148	1.60396	0.853905	0.894032	0.583643	1.5856	0.955126	0.613455	1.95172	1.04952	1.70455	-0.305797	0.609094	1.47843	0.411078	2.0487	1.45969	0.843749	1.04088	0.818025	1.55298	0.567132	1.1193	-0.169301	0.723505	1.42028	-0.396885	-0.0703359	0.24696
TCGA-CV-6956	A	low	Yes	Yes	Negative	0.23704	-0.38748	0.766726	-0.215726	-0.0189718	-0.550396	0.451709	-0.140184	1.27943	0.184377	0.2385	-0.360772	0.353157	0.263592	0.556797	-0.0515241	0.243915	0.741536	0.631587	0.514808	0.887178	0.286929	0.280074	0.140024	-1.77927	1.3768	-0.143738	0.833848	0.842473	-0.824923	0.992604	-0.235543	-0.906746	0.851056	-0.0867678	0.77355	1.13763	-1.27195	0.950191	-0.633059	0.643049	-1.28263	0.275691	-0.396314
TCGA-CV-6959	B1b	low	No	Yes	Negative	0.508523	0.44806	0.115815	-0.582279	0.636845	-0.449421	0.64365	0.654621	1.18481	0.741073	0.558966	-0.0526511	0.697348	0.849882	-0.182171	-0.112165	0.597379	0.921406	0.69984	0.765365	0.451599	0.389554	0.33046	-0.00411297	1.40555	0.0760898	-0.115356	1.30629	0.237591	0.780125	0.395108	-0.132245	-0.251996	1.42389	0.898266	-0.00545474	0.871582	0.192991	0.772952	0.736704	0.669124	0.860857	0.885407	-0.0981697
TCGA-CV-6960	B1a	high	Yes	Yes	Negative	-0.235411	-2.08442	-0.779713	-0.163254	-0.556102	0.0697635	-0.37342	-0.706376	0.0850655	-0.428715	-0.396516	0.0703419	0.178785	1.01846	0.0793977	0.0724488	-0.440084	-2.27518	-0.197523	-0.211436	0.439486	-0.320426	-1.28837	-0.179464	-1.20941	-0.572746	-0.67019	0.95998	0.435471	-1.71787	-0.798973	0.212492	-0.713118	-0.0340335	-0.0641035	0.879643	0.147255	-2.32785	-0.135737	-0.374012	0.174107	0.056269	-1.45987	-1.09403
TCGA-CV-6961	B2b	high	Yes	Yes	Positive	0.386189	0.251517	-0.125332	0.492084	-0.491034	-0.0955438	-0.463207	-0.279944	0.975617	0.0565019	0.138422	-0.0439215	0.997916	-0.718257	0.340005	-0.252465	0.0439821	0.273585	0.766146	0.6881	0.126697	-0.301449	-0.0298288	-0.360298	0.00818061	1.57619	-0.462454	0.547339	1.57363	0.212082	-0.0272387	0.314341	1.1069	-0.147303	0.0128786	-0.403548	0.330706	-0.789093	1.51994	0.0371414	-0.136263	-0.337125	0.133665	1.45787
TCGA-CV-6962	B2b	high	Yes	No	Negative	-1.03248	-0.872664	-1.98111	-0.431619	-0.788748	0.204598	-2.29708	-0.621205	-1.46142	0.339078	-0.0951471	-1.38818	-2.18967	-1.67833	-1.58048	-1.26696	-0.402626	-0.136754	-1.54542	-2.34646	-0.191687	-1.15112	-1.75296	-1.60818	-2.29997	0.249883	-0.67019	-1.42919	-1.17708	-1.98187	-1.36299	-2.7509	-0.153764	-1.48057	-0.963444	0.314361	-1.38805	-0.706987	-1.33353	-1.96743	-0.769106	-1.87538	-1.81769	-1.86729
TCGA-CV-7089	A	low	Yes	Yes	Negative	0.995189	0.836957	1.02691	1.25222	0.74594	0.519601	0.482762	1.02156	0.348024	1.41217	0.62874	0.887606	0.714681	0.754798	0.743558	0.881823	1.04985	0.743944	1.13013	0.418775	1.23127	0.264259	1.13618	0.882976	0.656409	1.48614	3.40021	-0.533342	1.20762	0.583042	1.08639	0.758685	-0.249903	1.12196	-0.20968	0.306617	0.546541	-0.0526691	-0.956274	0.641094	0.824506	0.555856	1.12585	0.0936646
TCGA-CV-7090	A	moderate		No	Negative	1.07648	-0.130036	-0.0535325	0.761285	0.352144	0.465741	0.733481	0.479816	1.0341	1.00232	0.914188	-0.249676	0.78421	1.05877	0.349928	-0.359377	-0.0461435	1.31479	0.0529998	0.480457	0.0937181	0.206676	1.44928	0.213416	0.840347	0.462791	5.05541	1.7242	-0.353289	1.01491	0.165614	0.519363	0.134269	0.694089	0.299787	0.253442	0.234632	1.02576	0.32751	0.105712	0.61192	0.244908	0.558282	1.16476
TCGA-CV-7091	B1a	moderate	Yes	Yes	Negative	0.661852	0.206346	0.746044	0.461983	0.661448	0.680529	0.755358	1.07343	-0.133895	0.0173211	0.399487	0.314463	0.361584	0.454696	0.649057	0.34607	0.848021	0.974952	0.36321	0.353212	0.272974	0.880904	-0.355904	-0.466102	0.639591	-0.183807	0.390903	0.139471	0.870235	0.0700035	0.707446	0.139977	0.418643	0.554099	0.446317	0.197701	1.40202	0.831025	0.264876	0.634637	0.820576	1.22832	0.306398	0.407962
TCGA-CV-7095	A	low	Yes	No	Negative	0.498846	-0.490812	-0.691848	1.16623	0.854267	0.651143	0.872448	0.845365	-1.95185	0.945382	0.279958	0.397471	0.677374	0.638111	0.56134	0.337331	0.918354	0.872714	0.672481	0.351072	0.465005	0.925249	0.26715	-0.1888	0.254186	0.687212	0.491741	-0.227297	0.495046	0.585075	0.369497	-0.04354	-3.23402	-0.364923	0.697716	1.06885	1.14654	0.425654	-0.188697	0.283463	0.812731	1.44178	0.317062	0.890636
TCGA-CV-7097	B1b	moderate	Yes	Yes	Negative	-0.240011	-0.393181	-0.82759	0.469669	0.73112	0.370154	0.54993	0.814138	-0.512272	0.521877	-1.11628	-0.157891	0.318518	0.343786	-0.171581	-0.314444	0.383197	0.735486	0.485101	0.308687	-0.136897	0.468755	-0.519754	0.382525	0.465595	0.645937	0.668039	-0.874832	-1.17708	1.10085	-0.031518	-0.264958	-0.0347928	0.823413	0.690687	0.491042	-0.417944	-0.173201	0.978939	-0.0343597	0.78587	0.59227	0.629721	1.38093
TCGA-CV-7099	A	low	Yes	No	Negative	0.25925	1.65779	0.394247	1.06787	0.773038	0.723067	0.635316	0.855232	0.604176	0.672481	0.110717	0.498458	0.988012	0.452866	1.06506	0.505061	0.44913	0.783503	0.286177	0.881112	0.319581	0.425466	0.342112	-0.182199	1.1529	0.493597	1.16958	1.63361	0.981682	0.970232	0.796115	0.698872	0.538563	0.0520772	0.511508	0.528394	0.396029	0.704682	-0.0648117	1.1419	0.663436	0.0665637	1.46167	0.988783
TCGA-CV-7100	B2a	high	Yes	No	Negative	-1.14389	0.121918	-0.861114	0.526136	-1.70094	-1.15256	-0.558132	-1.29611	-0.799089	0.417537	-0.839664	-1.2084	-0.392949	-0.421343	-0.861135	-1.33748	-1.1363	-0.299006	0.444461	-1.0262	0.310615	-2.96768	-0.959003	0.42248	1.14831	-0.593007	-0.67019	-1.27502	-1.17708	-0.880935	-2.0158	-1.59336	-1.44826	-2.48817	-2.11668	-1.0705	-1.76469	-1.62636	-0.55996	-1.86359	-2.41504	0.472112	-0.706981	-0.129352
TCGA-CV-7101	B2b	moderate	Yes	Yes	Negative	0.0887286	-0.117138	-0.202972	0.617273	0.097919	-0.162539	-0.161567	-0.0432397	-0.140181	0.285656	-0.0290822	0.277181	0.00955268	-0.593075	-0.0665963	0.116702	0.287761	-0.881796	0.62387	-0.204017	0.166351	-0.28695	-0.09533	-1.08984	0.170743	-0.0371433	-0.386023	-0.715694	0.0497844	-0.975169	-0.154703	0.384188	-0.307872	-0.912232	0.177113	0.535471	-1.4353	-0.063951	-0.705754	0.784754	0.0933364	-0.162172	0.128807	-0.551664
TCGA-CV-7102	B1b	moderate	Yes	Yes	Negative	0.125088	0.0068817	-0.526886	-0.278792	0.329069	0.112772	0.805751	0.323162	0.744884	-0.147262	0.184538	-1.06869	0.682876	0.0817731	-0.050985	-0.837243	0.672668	1.27924	0.552065	0.43536	-0.929117	0.127809	0.456346	-1.17572	-0.393219	-1.01646	-0.395464	-0.757289	-1.17708	-0.208179	0.463681	-1.31687	-0.138077	0.500109	-0.294145	0.288744	0.147741	-0.0808865	-0.221434	-2.17655	-0.943761	0.865797	-0.0710754	0.469306
TCGA-CV-7103	B2b	high	Yes	Yes	Negative	-1.28757	-1.01586	-2.48047	-1.45573	-0.248248	-1.224	-0.699772	-0.592869	-0.112037	-0.788252	-0.852399	-2.32465	-2.84816	-1.29179	-0.776737	-1.9836	-0.275997	-1.18154	-1.51352	-2.27574	-0.771903	-0.483076	-1.35009	-1.58659	-1.2655	-0.644442	-0.429364	-1.42919	-0.944637	-1.15354	-1.07151	-2.96088	-1.29553	-0.791377	-1.21143	-0.522913	-1.548	0.513223	-0.756941	-1.34696	-0.508763	0.336488	-1.43205	-1.75976
TCGA-CV-7104	B1b		No	No	Negative	-0.233538	0.634601	-0.399353	0.566746	0.71456	0.783869	0.742024	0.531217	0.258224	-0.0568686	-0.0980133	0.115127	1.00494	0.371284	0.418637	0.102769	0.550449	0.845317	0.690755	0.336909	-0.0669569	0.711568	0.898816	-0.339593	1.21288	0.937723	0.0241624	1.49341	0.786083	1.43019	0.757935	0.61175	0.406613	1.11832	1.19275	1.08115	1.50985	0.527755	1.41102	1.41224	0.580859	0.914181	0.354454	0.993049
TCGA-CV-7177	B2b	high		No	Negative	-0.256574	-0.801973	-1.35932	-1.13863	0.22921	0.0234132	0.0588113	0.280621	-0.0956902	1.09241	0.0457878	-0.64974	-0.63662	-0.10243	-0.0303233	-0.413264	0.6318	0.0180207	0.237904	-1.13175	0.120152	0.0880384	-0.442162	-0.813434	-1.32799	0.779118	-0.67019	-0.634318	-0.75617	-1.3083	-0.294352	-0.355636	-0.147344	-0.142713	-0.0727142	0.162674	0.0860838	0.278718	-1.66787	-0.695481	-0.0594173	-0.168664	-0.248453	-0.0557698
TCGA-CV-7178	B1b	moderate	Yes	Yes	Negative	0.49132	1.1222	-0.0548082	0.631843	-0.373824	0.182692	0.363012	-0.224971	0.706359	-1.01189	0.364511	0.130826	0.651024	-0.0391851	-0.636359	-0.208733	0.055218	0.57139	0.607112	0.970602	0.213774	0.0277273	1.03651	-1.02199	0.337395	0.338919	-0.67019	1.3575	-0.512709	0.340168	-0.607619	-0.307247	0.741555	-1.0664	-0.891641	1.05717	1.32069	-0.25764	-0.0184774	-0.995822	-0.118299	0.662791	0.431275	0.679713
TCGA-CV-7180	A	low	Yes	Yes	Negative	1.01565	0.664062	0.774069	1.17634	0.909488	0.231827	0.953393	1.26729	1.01143	0.326095	0.689135	0.995065	0.359486	0.200503	1.18209	1.24805	1.06923	0.899667	0.570531	-0.483963	1.00694	0.812555	0.420276	1.01387	-0.141003	0.839478	-0.67019	-0.138839	0.638281	-1.05896	1.37138	1.16543	0.318549	0.277519	-0.488349	0.680406	1.687	0.964681	0.488442	-0.243833	0.920827	0.603117	1.47747	0.18066
TCGA-CV-7183	A	low	Yes	No	Negative	1.55587	0.921101	1.1565	1.18681	1.91982	1.05612	1.17053	1.87676	1.41804	1.45328	1.20972	1.30321	0.731044	1.08365	1.72442	1.34132	1.59734	1.01587	0.485775	0.94124	1.1499	1.49788	1.15332	2.64203	-0.505549	1.32883	-0.67019	1.60654	0.895847	-1.09575	1.67224	0.528082	1.07843	1.13558	0.804821	1.43786	-0.246083	1.2699	1.16358	1.01409	1.58034	-0.126326	0.898437	0.675496
TCGA-CV-7235	B1b	moderate	Yes	Yes	Negative	-1.06267	0.732858	-0.767266	-1.24753	-1.13547	1.14564	-0.182904	-0.539408	-0.961706	-1.45496	-0.671571	-0.781062	-0.405403	0.916169	0.75816	-0.999403	-0.301701	-0.104137	0.438315	-0.384728	-1.48373	-0.219202	0.326544	-0.19535	0.830271	-2.76894	-0.67019	1.30467	-0.668918	1.14938	0.674823	0.301421	0.809072	-1.22263	-1.37103	-1.78805	0.245592	-0.901061	0.241041	0.0405659	0.337442	-1.10779	1.31857	-0.913352
TCGA-CV-7236	B1b	moderate		No	Negative	0.13456	0.441448	-0.157605	-0.582962	0.379428	0.847364	0.379939	0.134832	0.568775	0.966388	-0.152473	-0.0786608	0.335881	0.668047	0.230317	-0.0324317	0.386759	0.29156	0.407139	0.0705824	0.63812	0.291402	-0.0834634	-0.631728	0.0902851	0.11819	-0.22445	0.596822	-0.932943	-0.119707	-0.218378	0.430254	0.108464	-0.347293	0.135889	-0.568393	1.04502	-0.290238	0.268484	-1.91314	-0.229814	0.964438	0.580231	0.487711
TCGA-CV-7238	B1b	moderate	No	No	Negative	0.737527	0.954122	0.371628	0.159777	0.577958	0.797636	0.549415	0.458645	0.614692	0.654738	0.393634	0.555148	0.842001	0.948297	0.655497	0.595805	0.37433	0.284443	0.601713	0.886729	0.432378	0.508607	0.50001	-0.0160145	0.42302	0.730175	-0.67019	0.980751	0.450003	0.573811	0.702478	0.934127	0.890246	0.654922	0.78883	0.787345	1.29243	0.641856	1.01269	-0.193123	0.0745806	1.04678	-0.427675	0.340203
TCGA-CV-7242	B2b	high	Yes	Yes	Negative	-1.31509	-0.880866	-0.0513286	-0.439189	-0.493104	-2.72617	-0.373449	-0.806737	0.349093	0.511239	-1.90843	-0.410948	-0.569075	-0.798543	-0.274946	-0.595089	-0.542036	-1.8183	-0.157379	-0.290183	0.452245	-0.253355	0.287465	-0.212313	-0.183461	-0.422448	-0.67019	-1.15463	-0.408386	-0.476293	-0.154945	-0.147031	-1.18258	-0.160226	0.0950495	-0.790861	-0.380669	-0.647292	-0.625244	0.163969	0.164476	-1.47304	-1.06523	-1.21772
TCGA-CV-7243	B1b		No	Yes	Negative	1.39752	-0.0828007	0.0428145	-0.0124507	1.28258	0.287187	1.11507	1.45435	1.30457	0.530897	1.21744	-0.272689	-0.315604	0.743404	1.08094	0.0595721	0.899574	0.508928	0.747153	-0.120383	0.690683	1.14923	-0.212431	-0.107748	-0.40025	0.435953	2.05465	0.867383	-0.555898	0.246675	1.05794	-0.129826	0.712952	0.506814	-0.529898	0.83944	0.526448	1.08995	-0.477969	-1.51458	-0.0453765	0.956526	-0.491383	1.53421
TCGA-CV-7245	B1a	high	Yes	No	Negative	0.289471	-0.38134	-1.02852	-1.63912	0.731413	-0.349725	0.649081	0.8287	-0.0136269	-0.111798	0.198021	-0.20962	0.660886	0.0340371	0.678047	-0.236857	0.829899	0.233282	0.504319	0.832104	0.150304	0.684918	-0.581681	-0.517463	-0.281954	-0.456177	-0.67019	-1.11814	0.369451	-0.946282	0.952278	0.148482	0.479632	0.376671	0.89661	-0.925421	0.659796	2.12776	-1.2795	0.486385	0.120333	-1.07213	1.25543	0.0202746
TCGA-CV-7247	B1b	moderate	No	No	Negative	0.471447	0.607656	-0.815914	-0.117318	0.17342	0.37201	0.538168	-0.0937981	0.189329	-0.142974	0.56235	0.132073	-0.0747863	0.120909	-0.0735064	0.108146	0.243949	1.12013	-0.0917593	-0.331713	-1.4346	-0.129689	0.231863	-0.627421	-1.15329	-0.730767	-0.67019	-0.80962	-0.946691	-0.557764	-0.118359	0.540119	0.0799823	0.299725	-0.137296	0.296147	0.0714529	-1.3102	0.369804	-0.295371	-0.00629809	0.238615	0.241612	-0.739642
TCGA-CV-7248	B2b	high	Yes	No	Negative	-0.909072	-0.588199	-0.420176	-0.221799	-0.44984	0.17441	-0.543918	-0.206353	-0.764481	-0.0978168	-0.573211	-0.450989	-0.188946	-0.673384	-0.635691	-0.397137	-0.0110631	0.490896	-0.484039	-0.334184	0.764626	-0.657751	0.30919	-0.397337	-0.757059	-1.01493	-0.67019	-1.42919	-0.335595	-1.07425	-0.407173	-1.3386	-0.444068	-0.54499	-0.772063	-0.144048	-1.43429	-0.0105163	-0.20936	-0.547418	-0.378407	0.00804218	-0.324948	-0.704393
TCGA-CV-7250	B1a	moderate	Yes	Yes	Negative	-0.544561	-1.51668	0.486535	-2.50487	-0.286917	-1.26473	0.0539474	-0.617613	0.331052	0.203171	-1.98609	0.32659	0.334391	-0.256483	0.451801	-0.13361	-0.189501	-0.51401	0.505919	0.861165	0.513218	-0.213849	0.750754	0.945204	-0.56001	-0.739566	-0.67019	-0.861987	1.58179	-0.886355	-1.30963	1.04009	-0.646282	0.397743	-0.00628987	-0.0852299	0.217777	-1.67846	-0.813587	1.11006	0.349129	-2.15236	-3.05349	-2.09007
TCGA-CV-7252	A	low	No	No	Negative	0.97862	0.635125	-0.362025	0.267821	0.804628	0.971969	0.635072	0.849888	0.603369	1.20777	0.925053	0.52388	0.424603	0.254307	0.649628	0.287665	0.462355	0.693699	1.01549	-0.00567056	-0.00718393	0.532178	0.893252	0.676131	0.241221	-0.115819	-0.181795	1.75614	-0.299185	0.392475	-0.0971394	-0.297116	0.166826	1.36966	0.315746	0.771611	0.764136	0.260828	-0.537517	-0.130612	0.750464	1.61832	0.550099	0.840871
TCGA-CV-7253	B1a	moderate			Negative	-0.985922	0.139721	-0.00343651	-0.589866	0.136821	-3.2665	0.519934	0.0922042	-1.51024	-0.123041	-2.12755	-0.738422	0.696938	-1.05581	0.783917	-1.40965	0.61673	-1.83269	1.19917	-0.431217	0.0177565	0.0514925	-1.70215	-1.13687	-0.942524	-1.76283	-0.67019	-0.0538431	0.284706	-2.57473	0.298497	-0.721889	-0.751841	-0.675998	-1.42138	-2.51502	1.03804	-1.7783	-2.0104	-0.408492	0.145021	-1.60559	-1.49557	-0.344904
TCGA-CV-7254	B2b	high	Yes	Yes	Negative	-0.734097	-0.399004	-1.99425	-0.826459	-1.61016	-1.19489	-1.48815	-1.47791	-0.375487	-1.60402	0.0765741	-1.5452	-2.26277	-0.40728	-2.38474	-1.49883	-1.667	-1.11039	-2.86019	-1.86579	-2.40429	-1.7279	-1.01842	-1.25645	-0.447246	-2.355	-0.67019	-1.42919	-1.17708	-0.0423271	-0.763527	-0.79357	-1.16317	-1.12799	-0.44358	-1.72143	-1.1655	-0.265826	-0.153323	-1.13872	-1.08789	-0.769055	-0.878787	-1.13458
TCGA-CV-7255	A	moderate	No	Yes	Negative	-0.387457	0.320705	0.818936	0.37021	0.128758	0.323566	0.659743	0.246541	1.01268	0.537053	-0.48118	0.0853204	0.841846	0.572395	0.321689	0.120398	0.478946	0.855544	1.0329	-0.109867	1.3727	0.340688	-0.0374633	0.347629	-0.325194	1.49298	-0.314982	0.998518	0.949355	0.426643	0.484172	0.519766	-0.546372	1.19834	0.33528	0.651985	0.981152	-0.0386762	1.57297	-0.494037	1.05568	1.13092	0.904243	0.888046
TCGA-CV-7261	B2b	high	Yes	No	Negative	-0.694961	-0.51823	-0.748049	-0.924604	0.0162497	-0.102732	-0.220042	-0.16065	-0.876504	0.549927	0.194893	-1.55473	-2.29964	-1.05399	-1.27407	-1.16645	0.241196	-0.300539	-0.0391193	-2.5021	-1.90378	-0.360977	-0.437634	-1.1744	-0.547183	0.0525339	-0.67019	-1.06594	-1.17708	-0.746896	-1.29717	-1.94052	-1.20105	-0.37001	-0.803296	0.747645	-2.02727	-0.035327	-0.806343	-0.667625	0.310232	-1.1289	0.817111	-1.65431
TCGA-CV-7263	B1b	moderate	Yes	No	Negative	-1.33917	-1.11451	0.18437	0.0357635	-0.57261	-2.47276	-0.135564	-0.921524	0.953009	-0.513646	-1.203	-0.972275	-1.92092	-0.412313	-0.458734	-1.00869	-0.884959	-0.687976	-0.728996	-2.00292	0.128375	-0.516329	0.617215	0.571239	-0.653125	-2.69564	-0.67019	-0.566473	-0.644803	-0.571588	0.0489169	-0.395077	-1.41607	-1.44452	-0.903105	0.630914	-0.0994696	0.614753	-0.998839	-0.792581	0.606331	-1.63058	-0.832378	-1.18046
TCGA-CV-7406	B2a	high	Yes	Yes	Positive	-1.6724	-1.14444	-0.839029	-0.35698	-0.887628	-1.42246	-3.34705	-0.877443	-0.862341	-0.673413	-0.667098	-1.19942	-0.530282	-1.65357	-0.569081	-1.38808	-0.702332	0.192103	-0.34637	-0.959758	-0.115809	-1.82268	-0.377872	-0.6003	-1.75557	-0.109353	-0.67019	-1.42919	-1.17708	-2.47394	-0.409678	-0.069461	-1.48411	-1.73276	-0.526223	-0.960323	-0.242485	-1.43142	-1.15882	-0.353183	-1.33606	-0.933627	-0.515432	0.41157
TCGA-CV-7407	B1b	moderate	No	No	Negative	-0.772044	0.175607	-0.132313	-0.437257	-0.375252	0.254901	-1.64068	-0.229318	-1.66078	-1.15875	-0.0778007	-0.383117	-1.61716	0.69035	0.729879	-0.0824131	0.289228	-0.498577	0.470899	-1.5962	-1.54152	0.161619	0.48814	-0.796598	0.838542	-0.0663248	-0.67019	-0.0815277	-1.17708	-0.79341	0.406841	0.526155	0.80247	-0.760432	0.660763	-0.158365	0.791183	-0.662741	-0.205607	-0.696018	-1.63542	-0.335244	0.261979	0.143485
TCGA-CV-7409	B1a			No	Negative	-2.55861	-0.679233	-0.359331	0.158693	-0.991338	-3.17096	-0.464563	-0.981526	0.711013	0.245314	-2.60113	-0.233419	-0.396454	-1.31149	-0.552052	-0.217132	-0.500084	0.150056	0.00275956	-0.868618	0.890572	-0.485177	-0.210044	0.283724	0.628871	-0.30516	-0.67019	0.91818	-0.287956	0.471628	0.100674	0.117646	0.0105976	-0.618432	-0.333257	0.0735553	-0.0577294	-0.78182	-0.520192	-0.131156	-0.0311412	-1.8424	-2.84762	-1.50695
TCGA-CV-7410	B1b	moderate	Yes	No	Negative	0.959014	0.436274	0.208348	0.254862	0.653214	0.411897	0.727165	0.808935	0.764147	0.168447	0.807814	0.695555	0.565825	0.0256106	0.128829	0.648702	0.764835	0.826567	0.730672	1.01998	0.17474	0.97905	0.765725	-0.200861	1.23055	0.578702	-0.406313	1.14587	0.784344	0.552352	0.47567	1.21575	0.988423	0.313123	0.463847	-0.455337	1.1396	0.56411	-0.37793	-0.247941	0.255523	0.495041	-0.310493	0.650991
TCGA-CV-7411	A	low	Yes	No	Negative	1.7738	1.23184	1.33826	1.59899	2.01878	1.07438	1.3175	2.07344	1.13089	1.64246	1.1136	1.4471	1.15931	1.02061	1.37475	1.39871	1.94275	1.13288	0.767205	1.67334	1.56817	1.68376	0.702811	1.80896	-0.423523	1.09992	-0.322565	1.58345	0.886829	0.00776945	1.50754	0.790769	1.39289	1.23942	0.659143	1.33819	0.612332	1.68481	-0.421598	1.08241	1.45418	0.851784	1.33751	0.293559
TCGA-CV-7413	B1b	moderate		No	Negative	1.04585	1.19901	-0.0867749	-0.0507431	0.756826	1.0229	0.86206	0.819195	0.990357	-0.0560826	0.946423	0.90189	-0.0974996	0.255651	0.550806	0.847646	1.02782	0.762494	0.710449	-0.5985	0.713451	0.981807	-0.633288	0.81516	0.542037	-0.0572832	1.02894	1.3738	0.440594	0.97139	0.796834	1.20974	0.844279	0.794187	0.714381	0.715628	0.680178	0.951718	0.46952	-0.434846	1.00129	1.43411	-0.589935	1.15975
TCGA-CV-7414	B1b	moderate	Yes	No	Negative	-0.952909	-1.55969	-0.661202	1.45119	-0.449284	-1.40325	-0.396092	0.636422	0.50931	-0.781843	-0.862936	0.0958058	0.509679	-2.43115	-0.128985	0.052981	-0.281295	-0.253148	-1.03043	-0.0710008	0.435302	-0.0832319	-0.513443	-0.950776	-0.827086	-1.23981	-0.419045	0.39943	-1.17708	-0.118132	-0.597073	-0.382496	0.812589	-1.20846	-0.0434765	-0.382073	0.335003	1.10966	-1.65753	-0.19603	-2.23432	0.110032	-0.826858	-0.18284
TCGA-CV-7415	B1b	moderate		No	Negative	0.56761	-0.109637	-0.299831	-0.688267	0.601369	0.573511	0.715756	0.531111	0.615633	1.18765	0.649791	-1.10412	0.0826245	0.526753	0.919196	-0.628455	0.631565	0.26115	0.842934	0.0789544	0.561939	0.810251	0.136436	-0.0616312	1.01586	0.345118	-0.404073	0.329276	-1.17708	1.25718	1.15863	0.658298	0.735503	0.158334	0.32821	0.406861	0.42841	-0.285208	-0.279824	0.297945	-0.446005	0.867995	0.52938	1.81738
TCGA-CV-7416	B1b	high	No		Negative	0.499787	-0.335149	0.625869	-1.22805	-0.490592	0.293942	0.278346	-0.23502	0.0922221	0.700226	0.739816	-1.1145	0.445593	0.784363	-0.0272202	-1.04184	-0.303588	1.50067	0.471322	-0.179177	0.325973	-0.164411	0.246347	-1.56477	-0.830368	0.38233	0.235034	0.375021	0.795327	0.363858	0.0596242	-0.552039	0.0630954	0.735553	0.522239	0.000547307	0.147432	0.426856	-0.354954	-0.174964	-0.0349737	1.17713	0.503638	1.15618
TCGA-CV-7418	B2b	high	Yes	Yes	Negative	-1.54044	-1.48983	-1.18135	-1.1615	-0.894877	-1.3269	-1.5228	-0.72518	-1.22565	-0.452802	-0.343577	-2.06942	-1.80175	-0.536428	-0.939144	-2.20979	-0.434786	-1.28901	-0.120417	-1.45049	-1.25932	-1.09638	-0.242747	-0.816104	-0.599719	-0.259665	-0.39698	-1.11643	-0.913381	-0.80123	-2.70253	-1.70152	-1.5702	-0.714784	-1.21409	-1.47651	-0.998393	-1.38254	0.268428	-0.141502	-0.538422	0.383409	-0.93787	-1.59387
TCGA-CV-7421	B1b	moderate	Yes	No	Negative	-1.75669	-0.387384	-1.57036	0.0541056	-0.219793	-1.74328	0.0235776	-0.407037	-1.30602	-0.359086	-0.650295	-0.690393	-0.233032	0.331652	-1.17437	-0.820283	-0.055729	-2.27518	-0.870685	-0.760693	0.0109714	-0.533551	-0.877993	-0.668644	-0.759229	0.498883	-0.67019	-1.2063	-1.17708	-0.727214	0.253616	-0.055731	-0.874177	-1.52973	-0.778589	-1.43387	-0.272009	-0.0900909	-0.566427	-0.118522	-1.94446	-0.503355	-0.320431	-1.05755
TCGA-CV-7422	B1b	moderate	Yes	Yes	Negative	-0.443054	0.50404	-1.86371	-2.04151	-0.0436863	-0.568094	-0.74634	-0.156554	-1.98631	0.747025	-0.110204	0.0325338	-0.280143	-0.697181	-0.0258503	-0.0604315	0.0340323	-2.27518	-1.25601	-0.439001	-0.771329	-0.66888	-0.020905	-0.880987	0.262414	-0.479337	-0.67019	-1.31701	-0.0996296	0.0770178	-1.59947	0.0488551	-0.895446	-2.56547	0.126076	-0.795499	-0.792878	-0.297109	-0.938495	0.954285	-0.381382	-2.58779	-0.84475	-1.91209
TCGA-CV-7423	A	moderate	Yes	No	Negative	1.60432	1.06993	0.51933	0.989965	1.19272	1.44374	0.835738	1.21529	0.514011	1.06329	1.23477	1.09133	1.17594	0.974983	1.02524	1.10206	0.961159	1.13972	0.932344	0.950852	1.04667	0.925851	-0.0334724	1.49398	-0.730427	0.938663	2.87322	0.709307	1.09556	0.231017	1.13594	0.770988	1.22423	1.17546	0.734766	0.0274075	0.992689	1.21399	0.519923	-0.222945	1.30288	0.84063	1.13529	0.951354
TCGA-CV-7424	B2b	high	Yes	No	Negative	-0.887509	-1.20358	-0.729693	-1.71345	-1.47703	-1.29	-0.898719	-1.18395	-0.430951	-1.55948	0.30865	-2.42891	-2.1596	-1.36778	-1.67593	-2.15756	-0.855684	-1.49363	-1.50881	-1.30962	-1.96234	-1.56676	-1.5159	-1.70239	-0.210575	-2.30634	-0.67019	-1.27808	-1.17708	-0.473194	-2.25016	-1.89355	-1.16376	-2.39343	-1.8172	-1.55115	-0.568544	0.459529	-0.929334	-0.346863	-2.07096	-0.935346	-2.00617	-1.00002
TCGA-CV-7425	A	low	No	No	Negative	1.31596	1.24798	1.59722	0.91387	1.57914	1.09594	0.9852	1.60745	0.918052	2.13243	0.657769	0.793018	-0.70152	0.631763	1.21988	0.774788	1.11482	0.985325	0.648094	-0.756378	1.46721	1.29916	0.704325	1.81084	0.869828	0.754026	-0.125502	1.25883	0.599444	1.08442	1.63905	0.511184	0.429686	0.956585	1.07739	0.891216	0.148145	1.29552	1.52272	0.643009	1.48883	0.991926	0.148191	0.296846
TCGA-CV-7427	A	low	Yes	Yes	Negative	1.40841	1.5459	0.15019	0.972398	0.817016	0.871349	0.481411	0.669816	0.814695	1.36262	1.24938	1.04103	1.04656	0.32692	0.289195	0.858818	0.814421	0.87049	0.47681	1.21537	0.752406	0.605706	0.999377	0.424913	2.28771	1.27234	-0.67019	1.93434	1.03115	1.56235	0.847271	1.11212	0.741341	1.3891	1.74338	0.995794	1.08141	0.657217	1.38836	1.48405	1.46659	0.700515	-0.141282	-0.0206766
TCGA-CV-7428	B1a	low	Yes	Yes	Negative	0.363356	1.36017	-0.0124537	0.615019	0.589074	-2.73237	0.602076	0.516062	0.853361	0.563772	0.562179	0.272277	0.349545	0.403504	-0.401886	0.331585	0.70214	0.902175	0.138603	0.482634	0.218457	0.766403	0.913354	1.14587	1.60645	-1.13341	-0.395581	1.48996	2.03072	1.02316	0.33788	0.648915	0.328645	0.0997681	1.25982	0.873352	0.676373	0.963693	0.76629	0.0498466	0.933966	0.973212	0.631051	-0.0873199
TCGA-CV-7429	B1b	high	Yes	Yes	Negative	-0.129674	1.08007	-1.11928	-0.71991	-2.19881	-0.274412	-0.877398	-1.77777	-0.900831	-0.808306	-0.378032	-2.79803	-0.00629271	0.684328	-0.850796	-3.06007	-1.7321	-1.9936	-0.896277	-0.502685	-1.27847	-2.49521	-2.03471	-1.33722	-0.219097	-0.291737	-0.67019	-1.1488	-1.17708	-0.715895	-1.47415	-3.77883	-1.00496	-2.10316	-2.24511	-1.85693	0.405256	-1.8343	-0.855289	-1.95808	-2.09775	0.610939	-0.243754	-0.352376
TCGA-CV-7430	B1b	moderate	Yes	No	Negative	0.51556	-0.699324	-1.43688	0.708778	0.449126	1.13485	0.0348894	0.547515	-0.605621	0.406013	0.394186	0.687195	0.782679	0.303551	-0.0420926	0.538415	1.19583	0.275066	0.758772	0.63954	0.198238	0.476017	-0.239449	-0.699049	-0.56363	1.44703	-0.0921745	-0.00540832	-0.0312434	-1.39611	-0.250348	0.246721	0.0921817	-0.183119	1.6045	0.581201	-0.723855	0.0612994	-0.713497	1.01349	0.837273	0.632487	0.489179	0.204256
TCGA-CV-7432	A	high	Yes	No	Negative	0.123977	2.07616	0.18246	0.429959	0.460549	0.695668	0.868194	0.373933	0.794521	0.362491	0.191476	0.346375	0.756875	0.8859	1.19489	0.397352	0.741135	1.00538	0.881727	0.800172	0.21066	0.423785	0.0381174	0.987037	0.747437	1.11945	-0.204617	-0.0870974	-0.0703024	0.596226	0.693631	0.517542	0.667834	1.26178	0.352362	-0.61969	0.748433	-0.731361	1.08872	-0.0190956	-0.625988	-0.104577	1.44189	0.0796504
TCGA-CV-7433	B1b	moderate	Yes	No	Negative	0.538796	0.260399	-1.30457	0.188869	0.709144	1.04645	0.522961	0.659424	-0.112912	0.0613791	0.464121	0.517182	0.554301	-0.0518284	-0.0367606	0.296315	0.468836	0.346802	0.143948	0.578757	0.57213	0.468011	0.243628	0.390489	1.28341	-0.211936	-0.403484	0.339512	-0.725984	1.48158	0.250673	0.921787	0.422691	0.666604	0.746599	0.989127	1.24336	0.420758	0.228987	0.435115	0.550908	1.01548	0.679129	1.37033
TCGA-CV-7434	A	low	Yes	Yes	Negative	0.888063	1.12622	-0.26005	0.617323	1.17665	1.10289	0.872707	1.14466	0.297464	1.05735	1.19902	0.118968	1.19827	0.61938	1.37123	-0.120067	0.782595	0.778765	0.52443	0.492821	-0.131215	0.809806	1.2713	-0.911004	1.15627	1.04821	5.42782	-0.55032	-1.17708	1.59326	0.229886	0.220566	1.29908	0.480051	1.32673	-1.63818	-0.59578	1.39957	0.521879	0.212602	-0.434159	0.779656	1.36208	1.51805
TCGA-CV-7435	B1b	high	Yes	No	Negative	-0.485446	-0.84702	-1.76271	-1.61019	-0.175656	-0.02688	-0.10299	-0.548842	-1.10123	-0.808711	-1.39403	-0.460198	0.0312706	-2.01218	0.0573361	-0.11803	-0.323076	0.0403886	-1.03891	-0.729638	-1.51949	-0.423643	0.15854	0.519158	0.257387	-1.49765	-0.67019	-1.05963	-0.729812	0.44276	-0.365286	-0.365729	-0.517303	0.178787	0.410406	0.102877	-0.951442	0.248237	-0.231232	0.536904	0.821572	-0.014134	-2.07113	-1.41481
TCGA-CV-7437	B2b	high	No	No	Negative	0.661421	-0.517394	-0.611906	-2.26203	-0.375302	-1.07679	-0.377643	-0.0128205	-0.755438	-1.60132	1.00703	-0.917644	-0.16242	0.342058	-0.51699	-1.54245	0.206937	-0.03889	-1.28431	-0.51471	0.795115	-0.142658	-1.44113	-2.47183	-1.01261	-1.68286	0.0183602	-0.696095	-0.888923	-1.30674	-1.58133	0.0730703	-0.607809	-1.33557	-0.920497	-1.08772	-1.87972	-0.942667	-1.70025	-1.09888	-0.636984	-0.0544876	-1.40961	-0.517698
TCGA-CV-7438	B1b	moderate	No	No	Negative	0.635411	0.847554	-0.453084	-0.577571	0.0810762	0.377967	0.381245	-0.32215	0.0812379	-0.38876	0.450179	0.158181	0.461055	0.61408	-0.0961842	0.259789	-0.195536	1.02134	-0.169543	0.617322	0.102239	-0.102464	0.532606	-0.545211	0.835377	0.0840068	-0.67019	0.638026	-0.514303	0.60355	-0.274237	0.390392	0.310158	1.06635	0.685101	0.563426	0.163863	0.168081	0.908331	0.0783453	-0.608653	0.887097	-0.178585	-0.773011
TCGA-CV-7440	B1a	high	Yes	No	Negative	-0.770428	0.440928	0.0848615	-1.37954	-0.949067	-0.405916	-0.358093	-0.686217	-1.04596	-2.05361	-1.29285	-1.86042	0.924817	0.633888	-0.441731	-2.02018	-0.3958	0.888414	0.178105	0.932181	0.261553	-2.40507	-1.00411	-0.462278	0.0598097	-2.41979	-0.67019	0.0486866	-0.62538	-1.03584	-0.357841	-0.429572	0.173327	-2.39416	-1.71313	-0.718335	0.307613	-2.80857	-0.168589	-0.644326	0.0975198	-0.0258148	0.521401	0.711441
TCGA-CV-7446	B2b	high	Yes	Yes		-0.264068	0.735066	-0.996847	-0.585084	-0.232592	0.106522	-0.2326	-0.424515	-0.398149	-0.150636	0.458686	-0.852445	-1.25328	-1.06844	-0.642628	-0.546556	0.014848	-0.251088	0.686689	-0.900619	-0.826185	0.242595	-0.589641	-0.960266	0.273705	-0.901709	-0.67019	0.457802	-1.17708	-0.15905	-0.13657	-1.45076	0.154902	-0.343133	0.300733	0.146296	-0.805288	-0.383635	-1.42891	-0.519172	-0.137073	-0.0823818	0.474332	-0.437976
TCGA-CV-7568	B1b	moderate	Yes	No		0.498495	0.549294	1.05404	-1.76357	-0.163564	0.527725	0.601044	0.172751	0.560085	1.11405	0.72497	-0.499636	-0.286352	-0.462517	-0.115153	-0.316274	-0.00802419	1.68904	0.204891	-0.345332	-1.28039	-0.142141	0.572195	0.156925	0.439398	-0.301944	0.0934406	-0.11165	-0.964461	-0.10892	-0.193616	-1.05891	-1.32257	-0.0332293	0.391454	0.224023	0.207336	1.08062	-0.347537	0.620268	-0.15124	1.50158	0.661131	1.53925
TCGA-CV-A45O	A	low	Yes	No	Negative	2.00439	1.95375	2.40641	1.15487	1.76489	1.47798	1.03131	1.80196	1.93259	2.02248	1.54692	1.74913	1.28207	1.43775	1.78605	1.69248	1.52254	0.947787	1.12215	1.92789	1.72209	1.47363	1.37773	3.33251	1.33653	1.16665	-0.67019	2.06521	3.36016	1.16857	1.58482	1.63994	1.34906	1.68627	1.7922	2.08781	1.02506	1.57898	1.70629	1.22427	1.84959	0.880299	0.0223109	1.33251
TCGA-CV-A45P	A	low	No	No	Negative	1.21328	2.0371	2.01099	1.09556	1.34069	1.02465	0.888411	1.54764	0.836579	1.07035	0.986121	1.29871	0.630293	1.27723	0.881955	1.18955	1.28467	0.846496	0.554644	0.913044	1.51484	1.08375	0.834961	1.89857	0.719174	0.868982	-0.67019	0.198184	2.14782	0.454692	1.28807	0.947267	1.07242	1.26357	0.569585	1.07834	1.17615	1.41403	0.675063	1.36023	1.50541	-0.223309	1.2039	-0.08843
TCGA-CV-A45Q	A	low	Yes	No	Negative	0.0348817	0.830049	1.94462	0.163079	0.8168	1.26835	1.39548	0.715752	0.909113	-0.340365	0.198468	1.80556	1.57302	1.07875	3.2118	1.46675	0.337319	-1.04786	-1.22329	2.41351	0.974013	1.72576	1.16028	1.29395	-0.0408505	0.645224	-0.67019	-0.144798	-1.17708	0.928837	0.672087	1.66465	0.0575278	-0.0131646	-2.87343	0.903414	0.872275	0.323336	1.74971	-0.128806	-0.881319	-0.302836	1.05629	1.15831
TCGA-CV-A45R	B1b	moderate	Yes	Yes	Negative	0.634946	0.421622	0.859681	0.743914	0.874509	0.540526	0.833863	0.840959	0.106769	0.400446	0.432407	0.853156	0.498585	0.129905	0.486057	0.979436	0.594653	0.789539	0.926592	-0.148578	0.739143	1.06725	0.797386	0.126636	0.461849	0.602317	0.329649	-1.07339	1.76944	0.499006	1.19351	1.04129	0.932168	0.638064	0.516483	0.462811	1.80067	1.45203	1.32223	0.0944091	0.445333	0.633749	0.147281	0.613741
TCGA-CV-A45T	A	moderate	Yes	Yes	Negative	0.570008	1.04589	1.15217	0.561376	1.15249	0.467723	0.919473	1.30137	0.745123	-0.128423	0.426674	0.907749	0.245433	1.00392	0.87311	0.974853	0.840768	0.397575	-0.0639046	0.413099	0.517586	1.11844	0.328663	1.35097	1.62073	0.0935243	3.79465	0.312791	0.690109	1.2584	1.10155	0.504004	0.807668	0.980113	-0.32444	0.837765	0.570919	0.651844	0.9572	0.214855	0.42309	0.195371	0.412686	0.965111
TCGA-CV-A45U	B2b	high	Yes	Yes	Negative	0.200151	-0.370301	0.0677701	-1.12493	-0.419721	0.417333	-0.542913	-0.296388	0.35009	-1.04355	0.470082	0.0410452	-1.01008	-0.962562	-0.303306	0.144503	-0.0348374	0.0867942	-0.230343	-0.0750652	0.025263	0.352974	0.22246	-0.519925	-0.376558	-0.890406	-0.67019	-0.079344	-1.17708	0.0584393	0.194935	0.104013	0.337598	-0.153132	-0.20683	0.11345	-0.784521	-0.63469	-0.961948	-0.168819	-0.0497519	0.625078	0.220323	0.208658
TCGA-CV-A45V	A	low	No	No	Negative	1.42517	1.58034	2.05701	1.34617	1.18251	0.849348	0.523418	1.38487	0.553584	0.868584	1.08986	1.32689	0.571076	0.537411	0.723442	1.13455	1.19063	-0.433274	0.37685	0.404269	1.21648	1.05888	0.303978	1.31913	0.307729	0.323033	-0.67019	0.32004	1.37183	0.253033	1.4256	1.39161	1.22073	0.928295	0.330369	0.736183	-0.62221	0.845781	0.346666	0.754447	1.41697	-0.577551	0.853856	-0.271707
TCGA-CV-A45W	B2b	high	Yes	Yes	Negative	-1.08322	-1.61336	-0.616961	-1.6123	-1.22034	-1.00466	-1.08246	-1.09738	-0.294497	-0.437382	-0.502538	-1.23639	-1.24503	-1.62123	-1.40042	-1.7086	-0.839281	-1.30922	-0.965825	-1.02884	-0.817711	-0.991683	-0.13736	-1.44724	-0.16203	-0.797649	-0.67019	-1.23755	-1.17708	-0.875773	-1.42701	-1.03673	-0.941529	-1.28403	-0.502901	0.0915694	-0.79574	-0.779843	-0.349871	0.0233342	-0.0288249	-0.0782304	-0.832997	-1.58161
TCGA-CV-A45X	A	low	Yes	Yes	Negative	1.98296	1.44128	1.18829	1.46133	0.360497	1.00283	0.29896	0.269444	0.813746	1.23897	1.74267	1.41293	2.10169	0.602606	0.545708	1.17583	0.618401	0.317032	0.963762	1.73059	1.31465	0.528123	0.860454	1.86202	-1.00084	0.54192	0.135679	0.118557	1.57468	0.109837	0.30831	1.04164	0.781594	1.07343	0.929117	1.23636	0.278163	0.72935	1.4673	1.45434	1.46972	0.662613	0.298537	0.853122
TCGA-CV-A45Y	B1b	moderate	Yes	Yes	Negative	0.234738	0.790157	-0.334717	-1.01958	0.34994	0.142241	0.110926	-0.183071	0.768611	0.0118189	0.572858	0.357595	0.94539	-0.0327184	0.205428	0.362384	-0.173225	0.425327	0.248729	1.25224	-0.602208	-0.0670216	1.71567	0.281098	0.394304	0.0791547	-0.67019	0.162736	-0.83134	-0.0107817	-0.525892	0.710461	0.564738	0.767607	0.78991	0.715264	-0.476957	0.526912	-0.263148	0.768843	0.199747	-0.284897	-0.102967	-0.205627
TCGA-CV-A45Z	B2b	moderate	Yes	Yes	Negative	-0.203042	-1.28535	-0.477972	0.136976	-0.273172	-0.308825	-0.108591	-0.290215	-0.180817	0.0639524	0.104849	-0.0627454	0.0724145	-0.71646	-0.97885	-0.0320892	0.0638851	-2.27518	0.260571	-0.28836	-0.585107	-0.364311	0.482932	-0.655683	0.0454144	-0.163679	-0.348381	-0.269288	0.477852	0.0400005	-1.16363	-0.217473	-0.832126	-0.719263	-0.101159	-0.760636	-0.596898	-0.217733	-1.05407	0.373247	0.155925	-0.14029	-1.5743	-0.878767
TCGA-CV-A460	B2a	moderate	Yes	No	Negative	-1.01127	-0.815653	-0.667367	-0.729571	-1.05398	-1.45886	-1.592	-1.17455	-1.63252	-1.29112	-1.05494	0.0781424	-1.73404	0.172974	-0.931874	-0.230121	-0.971301	-1.60452	-0.321499	-2.2947	-0.537882	-0.783455	-0.655382	-1.67771	-0.527864	-1.71719	-0.345144	-0.254374	-1.17708	0.0891251	0.0738003	0.0183046	-1.42085	-1.27283	0.671436	-0.480612	-2.51501	-0.527935	-0.962579	0.594989	-0.978843	-0.845939	0.210082	0.796483
TCGA-CV-A461	B1a	high	Yes	No	Negative	-2.46489	-2.14623	-0.880588	0.0497136	-1.06671	-2.55891	0.353663	-0.768143	0.0508226	-0.268191	-2.48156	-0.997831	-0.0417563	-1.89908	-0.365833	-0.888222	-0.347071	-2.08734	-0.261989	-0.363602	-0.63843	0.176061	1.04837	-0.236776	1.10204	-0.165679	-0.67019	-0.579038	-0.701892	0.708551	0.426786	-0.471255	-1.09048	-2.04494	-0.977816	-0.652476	0.658307	-0.533748	-1.24812	-0.620487	-1.24469	-1.69985	-0.847332	-1.57977
TCGA-CV-A463	A	low	No	No	Negative	1.55905	2.23185	1.88724	0.741621	1.21972	1.30657	0.993084	1.5097	1.20873	1.02976	1.26868	1.08866	0.291955	0.650785	0.854497	0.940168	1.29611	0.957622	0.769041	0.516699	0.310052	0.989123	-0.0108278	1.24204	0.568737	0.236826	0.527787	1.51514	0.8579	0.102149	1.60961	1.08181	1.36716	1.20116	0.50297	0.449266	1.08318	1.62179	-0.295782	1.11535	1.17843	-0.370349	2.27605	0.52581
TCGA-CV-A464	B1b	moderate	Yes	Yes	Negative	0.115978	0.416063	-0.340774	-0.31458	0.267917	0.361959	0.740717	0.324069	0.3437	0.202089	0.249023	0.550593	0.346639	0.607584	0.476004	0.329901	0.354114	0.175595	-0.223849	0.0566816	0.613248	0.523585	1.48221	-0.317011	0.480228	0.362868	-0.358841	-0.0038458	-0.629847	0.568008	0.680328	-0.400067	0.406127	-1.14325	-0.687687	0.333337	1.29919	0.757238	0.596565	-0.145177	-0.590834	0.400189	-0.685712	0.210941
TCGA-CV-A465	B1b	high	No	No	Negative	0.79144	1.0363	0.943812	1.07319	1.45695	0.996762	1.05496	1.62932	1.44387	1.12986	0.920176	1.16233	0.523966	1.5382	1.44146	1.11615	1.19279	0.666744	0.74991	0.278848	1.37996	1.24276	1.28092	1.62368	-0.17379	1.59824	-0.330919	0.0567398	0.608212	-0.206394	1.47059	1.08667	1.26111	1.20782	1.21748	0.878734	1.40298	1.6112	0.672251	-0.686803	1.32795	-0.183653	0.536603	1.34691
TCGA-CV-A468	B1b	moderate	Yes	Yes	Negative	0.732627	0.775313	1.09572	1.17809	0.747496	0.426224	0.312633	1.28591	0.241054	0.20213	0.401391	0.893002	0.0189312	0.0460484	0.907552	0.951827	0.814405	0.252217	0.00529861	0.149428	0.364521	0.614246	0.63743	0.797707	1.10863	1.3678	-0.315616	-0.443434	-0.011055	0.953556	0.605621	-0.100023	0.490018	-0.317257	-0.0549616	0.302663	0.413756	0.749249	0.2526	1.14591	1.05157	-1.24982	0.338434	-0.619509
TCGA-CV-A6JD	A	moderate	Yes	No	Negative	-0.223649	1.33486	0.785939	-1.40653	-0.75318	0.625675	0.0959877	-1.03389	-0.269302	-0.888995	-0.056264	-0.947319	-0.270524	0.920726	-0.268983	-1.03261	-0.680452	-0.410903	0.558614	-0.290465	0.0282675	-1.01653	-0.37294	-0.648235	0.713074	-0.9605	-0.67019	-0.456509	-1.17708	1.21885	-1.96711	-0.586404	-0.308826	-1.17159	-1.51778	-0.595201	-0.912721	-0.657577	-0.528615	-1.68229	-2.08877	1.12298	0.136859	-0.293017
TCGA-CV-A6JE	A	low	Yes	Yes	Negative	-0.0854525	-0.447618	-0.530391	-0.687402	0.100472	0.182342	0.976202	-0.159846	-0.0187876	-1.96254	0.206999	0.399927	0.502984	0.992912	2.15362	0.731649	-0.740062	-0.494691	-0.00797571	0.215843	0.25213	0.979956	0.821549	-0.158561	0.609275	-0.695695	1.39533	0.0356694	-1.17708	-0.0480537	0.734668	1.56123	0.305827	-0.192214	-1.92986	-0.513822	0.736405	0.615235	0.624048	0.197872	-0.940126	-0.0588352	-0.204532	1.26452
TCGA-CV-A6JM	A	high	No	No	Negative	-0.468333	-0.327074	0.449675	-0.49425	0.214349	0.929537	1.18872	-0.0480587	-0.00803486	-2.03945	0.37588	0.170888	1.25816	1.54429	2.40108	0.164067	-0.412281	-0.790196	-0.921749	1.71677	-0.896952	1.45957	0.394165	0.289734	-1.84072	1.39363	-0.67019	-0.777238	2.06915	-0.865762	0.582356	-1.04115	0.958358	-0.263646	-2.3609	-0.519636	1.15393	-0.2285	2.28921	-0.338051	-1.41599	-0.2172	0.72018	0.843071
TCGA-CV-A6JN	A	low	Yes	Yes	Negative	0.700241	0.275749	1.06148	1.10347	1.32536	1.0552	1.52919	1.22469	0.974712	0.0142097	0.739408	1.37027	1.0368	1.75914	2.54288	1.34786	0.452136	-0.173662	0.771814	1.15236	0.792157	1.64409	0.843108	0.542731	0.547607	0.971245	0.526038	-0.738453	1.50968	0.872448	1.53633	0.822072	1.47288	-0.256159	-1.41927	0.433439	1.40498	1.67707	1.40524	1.03251	-0.385774	1.27316	0.85746	1.22594
TCGA-CV-A6JO	A	low	Yes	No	Negative	1.10956	1.43466	1.63319	0.850665	1.11474	1.08945	0.893357	0.958172	0.569638	0.517169	0.941516	1.10749	0.591018	1.15443	1.32088	1.23958	0.871209	0.970022	1.09313	0.736735	0.469758	0.960779	0.808678	0.17939	1.06559	1.32172	-0.67019	0.939111	1.49876	1.6475	0.407853	0.682797	0.938323	0.305387	0.934368	0.119413	1.66402	0.374119	1.08189	0.114106	0.871664	1.40402	0.286398	0.837184
TCGA-CV-A6JT	A	moderate	No	No		1.32331	2.89386	1.29796	0.775905	1.42501	1.05102	1.36339	1.35728	0.866605	0.0121387	1.26045	1.57284	0.973328	0.824964	2.26045	1.52707	0.628397	0.328159	1.30058	0.498348	0.765856	1.90608	0.104842	1.54614	0.324258	0.872038	-0.233618	-0.19414	2.22325	1.82162	1.43602	1.24383	1.65981	0.514746	-0.434924	1.58898	1.69323	0.750461	1.47117	0.0710897	-0.905891	1.38739	0.190181	1.6784
TCGA-CV-A6JU	B1a	high	Yes	Yes	Negative	-3.38562	-2.31289	-0.162692	-0.953275	-1.58271	-1.42336	0.145369	-1.69279	0.10853	-2.88833	-2.94215	-0.932241	0.503044	-1.09821	0.987196	-0.919641	-1.44305	-1.03726	-0.532171	0.796975	1.11147	-0.719034	0.254535	-1.38668	-1.23224	0.793938	-0.67019	-1.27039	-0.639216	-0.205508	0.227759	-0.180983	-1.43336	-2.08733	-2.42379	-1.70303	0.585487	0.0232187	-1.6476	-2.15193	-1.47891	-1.42071	-1.55395	-0.968699
TCGA-CV-A6JY	A	low	Yes	Yes	Negative	1.42303	1.12434	1.62171	1.63543	1.4409	1.12831	0.921005	1.67015	1.16098	1.70405	1.22032	1.24801	0.379551	0.775938	0.924571	1.12989	1.19614	0.928213	0.690052	0.490359	1.44738	1.19684	0.465342	1.45731	-1.54779	0.460143	-0.67019	1.41416	1.26237	-1.17312	1.4576	1.11058	1.33636	0.831274	0.70623	0.995632	0.422029	2.36441	2.06849	-0.848023	1.88503	0.673924	0.964263	-0.0287002
TCGA-CV-A6JZ	A	moderate	Yes	Yes	Negative	-0.490739	-0.386928	-0.24967	1.16749	0.0636575	0.528097	0.688486	-0.00646782	0.542596	-0.478816	-0.256144	-0.0913805	-0.373053	0.139692	-0.335379	0.0304267	0.131719	0.00871538	0.85143	-0.318558	-0.157801	0.459047	0.00409858	-0.0557399	1.20416	0.605838	1.52124	0.761109	-0.898759	1.32202	1.11773	0.583668	0.722199	0.487452	-0.385038	-0.0613886	-0.330775	0.563435	-0.496852	-0.359261	-0.788663	0.588983	-0.114574	0.261347
TCGA-CV-A6K0	B1b	moderate	No	Yes		-0.0146427	0.471588	1.08008	0.959073	0.124886	0.169358	0.343773	0.829543	0.376796	0.255229	-0.26959	0.521783	0.066873	0.478767	-0.271836	0.67384	0.421508	0.453301	-0.0305955	0.0909777	0.685958	-0.00968102	0.805153	0.171741	0.550866	-0.40204	-0.67019	-0.57534	-0.104736	0.462952	1.16179	-0.423047	-0.235202	0.588887	-0.596668	0.571367	-0.773358	0.605109	-0.126343	-1.59565	0.0904126	-0.0545819	0.681766	-0.227048
TCGA-CV-A6K1	A	low	Yes	Yes	Negative	1.13554	0.076786	0.863431	0.558208	0.905755	0.837353	0.777393	0.889709	0.254009	-0.348066	1.3572	1.23222	0.177916	0.738914	2.01943	0.886487	0.166768	-2.27518	0.0324043	0.0343108	1.01195	1.09448	-0.142771	0.977108	0.403781	0.215883	1.36727	-1.24528	0.192734	0.56192	0.796302	0.75585	0.333279	0.109887	-3.32745	-0.898417	-0.669333	0.437342	0.529457	0.864777	0.249126	-1.63422	1.11824	-0.243019
TCGA-CV-A6K2	A	low	Yes	Yes		1.22011	1.07006	1.12034	0.384579	0.330828	0.708487	0.499062	0.833235	0.326637	0.605343	0.991954	0.970558	0.434398	-0.180855	0.346994	0.780242	0.637539	0.879452	0.700695	1.04928	0.940059	0.669407	0.426095	0.0343045	0.142962	1.10926	0.565524	-0.107837	1.20174	0.500429	0.734036	1.03113	0.806704	0.737839	0.365466	0.111104	1.27543	0.560415	0.76252	0.218784	0.576463	1.16922	1.01682	1.24876
TCGA-CX-7085	B1b	moderate	Yes	Yes	Negative	0.741233	0.502592	0.466985	0.798799	1.13056	0.775346	0.504085	1.16342	0.670547	1.05651	0.673025	0.68057	0.341891	0.492336	0.256806	0.596657	0.857213	0.59212	0.306967	0.277953	0.505523	0.647961	0.578363	1.52744	1.37248	0.902118	0.591161	1.32029	1.18274	0.993559	0.704614	0.469491	0.0834022	1.35037	0.924751	1.04719	0.183206	0.853019	0.89734	1.84799	1.38399	-0.0701296	0.982609	0.539847
TCGA-CX-7086	A	high	Yes	Yes	Negative	0.822028	0.183181	0.282358	0.0254171	0.677529	0.283726	0.377574	0.719212	-0.428185	0.195508	0.771807	0.999668	1.02115	0.154691	0.00763398	0.755453	0.626913	0.582293	0.225778	0.589692	0.00543736	0.463441	0.928447	0.99549	0.191213	-0.433763	-0.416949	0.229039	0.376039	-0.631019	0.642463	1.04479	0.770863	1.02153	0.803609	0.415937	0.583635	0.905403	-0.244467	1.41852	1.6379	-0.112365	0.489071	-0.113517
TCGA-CX-7219	B1b	moderate	Yes	Yes	Negative	-0.299029	0.983303	-0.41414	1.14677	-0.181245	0.592123	-0.181604	-0.403067	0.964482	0.374212	0.193928	0.432695	1.12202	0.0892492	-0.355404	0.310374	-0.115515	0.457354	0.508308	1.19283	0.156691	0.199544	1.48594	1.08414	0.690841	0.292981	-0.119665	0.851474	-0.331334	-0.382561	-0.679829	0.343853	-0.221628	0.130686	1.33982	0.717037	0.00911231	-0.66604	0.514876	0.918203	0.884562	0.701409	0.721964	-0.400983
TCGA-CX-A4AQ	B2b	moderate	Yes	Yes	Negative	-1.45982	-1.19988	-0.993716	-1.62064	-2.10858	-0.670602	-2.42495	-2.69825	-0.408249	-1.77827	-1.09942	-1.62898	-1.34213	-1.13242	-1.71922	-1.71506	-3.31739	-1.75898	-2.99676	-1.65017	-1.47908	-2.13788	-2.58097	-0.601332	-1.40186	-0.525392	-0.67019	-1.42919	-1.17708	-0.227174	-1.60513	-0.43766	-1.73765	-1.2019	-1.47411	-1.69105	0.410445	-1.22207	-1.30509	-1.08506	-1.17353	-0.84051	1.06782	-0.434689
TCGA-D6-6515	B1b	low	No	No	Negative	0.552894	0.323263	-1.00623	0.32392	0.440432	-0.0992541	0.296855	0.720599	0.490429	-0.354438	0.213133	-0.0289308	-0.442079	-0.282137	-0.61552	-0.0194957	0.377834	0.0497567	-0.490943	-0.878739	-0.616795	0.304105	0.354706	0.197411	1.50609	-0.0446741	-0.192717	1.32916	-0.558658	1.5478	0.620185	0.658358	-0.210149	0.406257	1.26465	0.077528	0.162296	0.640596	1.47092	-0.111498	-0.0767987	0.199433	-1.11739	-0.900871
TCGA-D6-6516	A	low	Yes	No	Negative	1.28143	0.936005	0.492328	1.25079	1.40863	1.025	1.09755	1.57309	1.25115	1.2776	0.916349	1.11836	0.694036	0.633305	0.62221	0.8513	1.18626	0.0258593	0.673759	0.870921	1.87934	1.38274	0.124119	0.591528	0.883052	0.321621	0.127619	1.50452	0.113049	0.999539	1.05055	1.19638	0.646403	0.523679	0.874029	1.5318	1.03601	1.79988	1.21659	0.311718	1.5137	0.162809	-0.434081	0.660153
TCGA-D6-6517	A	low	Yes	Yes	Negative	1.20774	0.456655	-0.347008	-0.265636	0.637288	0.762764	0.837211	0.610458	1.05857	0.566	1.08739	0.236112	1.0474	1.01125	0.571959	0.165139	0.696983	0.984404	0.276601	0.491636	-0.303268	0.640294	-0.401996	-0.84281	-0.53751	0.209444	0.388233	0.951644	-1.17708	0.248398	0.395443	-0.184955	0.879462	0.815184	0.540571	-0.72457	1.79616	-0.522207	1.26698	-0.248377	-0.0576254	1.49902	-0.222599	0.0357077
TCGA-D6-6823	B1a	high	Yes	Yes	Negative	-0.0271558	-0.484351	-0.482471	-0.476412	-0.259206	-1.79269	0.424955	-0.338594	-0.00704957	-0.433477	0.0135522	-0.854722	0.208562	0.215271	-0.142704	-0.903216	-0.00482247	0.143624	-0.117327	-0.279716	0.683063	-0.586241	-0.54376	-0.508661	-0.763594	-0.484478	-0.471995	0.675908	-0.38714	-0.0829128	-0.484618	-0.735481	-0.205355	0.75786	-1.03074	-0.0115611	1.18214	-2.42773	0.272136	-0.190887	0.618053	-1.81129	-1.01464	-1.05766
TCGA-D6-6824	B1b	moderate	Yes	Yes	Negative	-0.57223	-0.0381909	-0.399833	0.719933	-0.985263	-0.739258	-0.542578	-1.05475	0.456009	0.570501	-0.431831	-0.51114	0.112191	-0.394721	-1.51564	-0.787115	-0.988339	-0.139882	-0.58617	-0.62099	-0.090233	-1.12399	0.123401	-0.337385	-0.0161938	-0.272629	-0.237017	-1.02614	-0.940603	0.191461	-0.797062	0.238704	-1.43626	0.213072	0.1709	-0.277814	-0.641919	-0.271725	0.952829	-0.339345	-0.68282	0.0476052	-0.244324	-0.393633
TCGA-D6-6825	B1b	moderate	Yes	Yes	Negative	0.601396	0.17091	-0.563988	0.423317	1.05404	0.914805	0.53919	0.749035	1.30736	1.24656	0.63411	0.657697	0.542858	0.167165	0.238635	0.574523	0.810085	0.411401	0.420756	-0.509728	0.392193	0.916119	0.18513	1.38866	1.69038	0.299351	0.218735	0.0953105	0.835611	0.910142	0.70962	0.577292	0.688868	1.04665	1.67648	1.21951	0.357874	0.681902	0.586919	0.881968	1.18739	0.961781	-0.720164	1.12722
TCGA-D6-6826	B1b	moderate	No	No	Negative	-0.144805	0.760317	0.896342	-0.435539	0.0397909	0.185326	-0.0620427	-0.150572	0.776537	1.30886	-0.14844	0.0371697	0.647377	0.49321	-1.2248	-0.159257	0.0993508	0.901995	-0.13813	0.314331	0.145801	-0.0255061	0.153512	-0.0618606	-0.0435465	-0.771672	0.648638	1.35248	-0.0077846	-0.732983	0.290741	0.263814	-0.699296	1.79575	1.18007	0.520425	0.385925	-0.361243	0.635555	0.42343	0.483548	1.04133	0.460645	0.222449
TCGA-D6-6827	B2b	moderate	Yes	No	Negative	-1.64436	0.319813	-1.02795	-0.576845	-1.29572	-0.925888	-1.96587	-1.72881	-0.0649647	-1.26899	-1.53556	-0.302871	-1.58399	-2.98669	-2.57312	-0.203593	-2.5415	0.708412	-1.4077	-1.75187	-0.872345	-1.921	-1.79405	-1.33616	-1.32584	-1.52229	-0.67019	0.16107	0.257806	-1.90806	-0.788114	-0.672443	-1.27555	-1.13648	0.350517	-0.65141	-2.09213	-0.513936	0.347292	-1.7829	-1.19663	-1.1398	-0.365512	-1.3805
TCGA-D6-8568	B1b	moderate	Yes	Yes	Negative	-0.239957	1.10207	-0.408401	0.0323881	0.0201326	0.260069	0.232591	-0.290592	-0.137714	-0.201217	-0.0185282	-0.120412	0.413486	1.05398	-0.0469838	-0.237351	-0.22058	0.765746	-0.203655	0.307242	0.00874262	-0.309348	0.0868954	-0.918307	0.119495	0.0266121	-0.67019	-1.42919	0.264927	-0.586499	0.00419697	-0.0727934	0.12582	0.949891	-0.133141	-0.613058	0.799378	0.0522907	1.05188	0.643091	-0.163011	0.116803	2.23227	0.73969
TCGA-D6-8569	A	moderate	Yes	No	Negative	0.473814	0.792167	0.24838	0.19278	0.134847	0.817698	0.443109	0.0567102	0.293951	0.235176	0.363664	0.475298	0.579642	0.769909	-0.188063	0.348146	0.154577	0.245937	0.49391	0.0312037	0.675976	-0.0380149	-0.556882	-0.515985	0.551647	0.000677137	-0.28666	-1.11513	1.39464	1.31353	-0.0443636	0.591106	0.520319	0.514029	0.714085	0.720645	0.0745645	0.12952	1.12244	0.218754	0.954874	-0.0260443	-0.116974	0.345263
TCGA-D6-A4Z9	A	moderate	Yes	No	Negative	0.499132	1.46863	0.222244	-0.50336	0.540934	0.386417	0.740843	0.425782	0.953682	0.642475	0.260396	0.281985	0.860774	1.21308	0.285754	0.271183	0.712246	1.11903	0.828075	0.771016	0.273693	0.214201	1.37788	0.570947	0.982551	0.706961	0.427061	-0.413171	0.354363	0.48986	0.744111	-0.0365795	0.185659	0.834236	0.554708	-0.0719103	0.243654	0.969657	0.218951	0.476454	0.985816	1.03327	0.497259	0.581641
TCGA-D6-A4ZB	B1b	high	Yes	No	Negative	0.254614	0.250625	1.33995	-0.0838356	0.401189	0.937918	0.54443	0.477019	0.862091	0.141294	0.370331	0.61651	0.507268	-0.334706	0.285288	0.478759	0.594687	0.544126	0.797573	0.902855	0.416867	0.597827	0.450228	1.19773	-0.636854	0.354871	-0.0190714	0.39947	-0.801754	-1.39156	0.53478	0.773048	0.88558	0.72025	0.54135	0.857557	1.07702	0.391662	0.527756	0.698169	0.573742	-0.158575	0.689663	1.18398
TCGA-D6-A6EK	A	low	Yes	No	Negative	1.35495	0.401301	1.89489	0.540838	1.451	0.766351	1.49149	1.34097	1.12732	0.307576	1.24191	1.72351	0.809526	1.52901	2.20243	1.67088	0.814501	0.0223124	0.517145	1.77102	1.56224	1.77315	0.531199	1.95887	0.975444	1.63901	-0.67019	0.459172	0.498072	1.19494	1.76851	1.56873	1.62863	0.900814	-0.951267	1.30543	0.872378	0.835038	1.56398	2.11379	0.119696	-0.247856	0.20566	1.28209
TCGA-D6-A6EM	A	moderate	No	No	Negative	-0.682876	0.847095	-0.0627224	-0.439494	-0.245566	0.562844	0.560742	-0.484516	-0.0153562	-1.07179	-0.402278	0.157925	-0.0409958	0.94266	0.749514	0.14465	-0.919667	-1.25724	-0.086879	-0.293309	0.328528	0.214448	-0.195859	-0.612393	0.96972	2.92105	1.12297	-1.42919	-1.17708	1.58453	-0.266588	-0.344984	0.0840395	-2.0481	-2.42088	-1.23776	0.228902	-0.289113	1.14466	0.397089	-1.11831	-1.09519	-0.0788549	-0.84647
TCGA-D6-A6EN	A	low	Yes	No	Negative	-0.937826	0.907078	0.715831	-0.335838	-1.36992	0.639972	0.544762	-1.71536	0.487004	-1.07103	-1.02856	0.00425977	0.645176	1.32164	0.866574	-0.137287	-1.29739	-0.486432	-0.684975	-0.385911	1.03447	-0.916641	0.471574	0.476695	0.974385	0.593526	-0.67019	-0.67768	-1.17708	1.30281	-0.618254	0.157187	-0.780399	-0.718967	-2.97438	0.630896	-0.500808	-1.58182	1.89025	-0.423961	-2.36453	0.595713	0.116005	1.16476
TCGA-D6-A6EO	B1a	high	Yes	No	Negative	-1.03095	-1.63863	-0.92524	-0.378954	-0.779952	-2.31318	-0.335763	-0.983709	-2.69131	-1.86817	-1.94774	-2.51634	-0.434315	0.508305	-0.270208	-2.35601	-0.685042	-1.70921	-0.791768	-0.800474	-0.0981208	-0.633926	-0.0834305	0.194065	-0.878423	-0.891199	-0.451773	-0.568926	-0.200698	-0.487942	-0.429967	-0.65018	-1.25167	-0.432105	-1.09686	-0.283509	-0.801185	-3.14131	-1.14723	-0.490825	0.297279	-1.94173	-3.00416	-1.92092
TCGA-D6-A6EP	B2b	high	Yes	No	Negative	-2.89445	0.900554	-2.19922	-3.64831	-4.50373	-1.66808	-2.62998	-4.34282	1.20404	-3.90292	-2.4956	-2.84388	-2.97932	0.11066	-2.77653	-2.71925	-4.82291	-1.48375	-5.6666	-2.24969	-4.04968	-2.2707	-4.80643	-1.70138	-1.85853	-0.761674	-0.67019	-1.42919	-1.17708	-1.41685	-2.60323	-3.67213	-2.11333	-2.77854	-3.32745	-2.94758	0.170325	-0.0815452	0.526787	-2.62069	-2.38791	-1.46273	-1.50574	-1.47342
TCGA-D6-A6EQ	A	moderate	No	No		0.318246	0.36591	0.532145	0.919631	0.743199	0.441951	1.30811	0.479457	0.795665	-0.290158	0.650274	1.17655	1.01479	0.469123	1.46528	1.0181	0.677502	-0.261289	-0.0149991	0.709956	0.969062	1.28196	0.0798669	-0.105681	-0.317605	1.10617	-0.67019	-0.817452	-1.17708	-0.116055	0.208114	0.864568	1.01813	0.365789	-1.32329	0.998351	1.49854	-0.128385	0.00380882	0.876252	-0.982134	0.935738	0.322528	1.44547
TCGA-D6-A6ES	A	moderate		No	Negative	-0.40841	0.0182804	0.449412	0.0271455	0.654352	1.10408	1.00306	0.151998	0.789217	-2.39805	0.520813	1.84006	1.65106	1.49756	2.51403	1.92288	-0.414351	-2.27518	0.346461	1.88633	0.587984	2.29656	0.12094	0.506091	-1.04842	2.87494	-0.67019	0.0493373	-0.384	-1.2604	0.969586	1.59021	1.29273	-1.1629	-2.87108	-1.98496	0.594469	-0.27076	1.33635	-0.226427	-0.656116	-1.59136	0.460142	0.930207
TCGA-D6-A74Q	B1a	low	Yes	No	Negative	-0.756037	-1.66297	0.873356	-0.0373592	-0.423784	-3.39003	0.312944	-0.766735	-1.28327	-0.946931	-0.377729	-0.34893	0.152121	-0.198553	0.430961	-0.310393	-0.412075	-2.09265	0.585631	-0.0885952	0.669363	-0.714966	-0.189047	-0.864446	-0.334584	0.57558	-0.67019	-0.571879	-0.555684	0.268168	0.328966	0.363487	-0.62296	-1.79821	-0.966093	0.155467	0.730713	-1.3605	-0.477578	1.0475	-0.60105	-2.67605	-1.10264	-0.760019
TCGA-DQ-5624	B1b	moderate	No	No	Negative	0.360558	0.955874	0.321558	0.140606	0.100017	0.734398	0.335872	0.336509	0.879988	0.422185	0.62913	0.28384	1.02831	0.501618	0.816867	0.209361	0.432622	1.11418	0.0506017	0.840084	-0.326014	0.306522	1.21437	0.148792	-0.320331	1.53312	0.766899	1.17462	0.96018	0.243553	0.674028	0.0716129	0.780198	0.590792	0.179206	-0.237371	1.61102	-0.189144	0.606506	0.981058	0.369227	0.958506	1.53545	1.33627
TCGA-DQ-5625	B1b	moderate	Yes	Yes	Negative	0.351794	0.899284	0.580419	1.49302	0.867961	0.513234	0.725749	0.997533	0.852388	0.931746	0.0567762	0.487802	0.621003	1.28817	1.13166	0.551475	0.604512	0.654282	1.44575	0.3286	-0.133659	0.797778	0.961383	0.492271	2.38977	0.825435	-0.194992	1.68011	-0.132825	1.5938	1.35997	0.799632	1.00805	0.488509	0.481105	1.11632	1.49592	0.842893	1.55977	1.65234	0.572537	0.916784	0.247097	1.56495
TCGA-DQ-5629	B2b	high	Yes	Yes	Negative	-0.346839	-1.41264	-1.36435	-1.38865	-0.0321588	-0.30339	0.149207	-0.012421	-0.518615	-0.383324	-0.321014	-0.714703	-0.520515	-0.0576545	-0.408763	-0.97642	0.343802	0.399775	-1.67026	-0.209659	-1.02948	-0.991141	-0.166977	-0.56718	-1.62804	-0.554547	-0.67019	-1.42919	-1.17708	-1.09844	-1.88832	-0.813912	-0.369237	-1.22354	-0.204	-1.03958	-0.634114	-0.630677	-0.983756	0.564797	-0.101164	-0.549093	-0.895979	-1.66809
TCGA-DQ-5630	B1b	moderate	Yes	Yes	Negative	0.451323	-0.0123029	-0.621152	0.784105	0.435196	0.789668	0.514352	0.44195	0.827388	0.793777	0.346199	1.2351	0.935031	0.864628	0.604097	0.993526	0.447661	0.725136	1.58136	0.414011	0.121066	0.616783	1.69912	0.501464	1.63973	0.964603	-0.67019	1.21226	1.16967	1.00363	0.389986	0.967427	1.16128	0.680218	1.39373	1.12282	1.47665	0.833717	1.3553	1.99053	0.795999	1.12563	-0.169349	1.34715
TCGA-DQ-5631	B1b	high	Yes	Yes	Negative	-0.358558	-0.124228	0.917504	-2.28344	-0.97539	-0.117192	0.171593	-0.75471	0.0456223	-1.06588	-0.79208	-1.81023	0.679318	0.567151	-0.667531	-1.69547	-0.651693	1.02212	0.652914	-0.000690657	0.149909	-0.906789	-0.51002	-0.736285	-1.42274	-0.143346	-0.0316543	0.978253	-0.871106	-0.830208	0.415661	-0.488242	-1.6237	1.92311	-1.16797	-1.27129	-0.761148	-0.998477	-0.111711	-2.51778	-1.27302	0.654459	0.735249	0.101622
TCGA-DQ-7588	A	moderate	Yes	Yes	Negative	0.313431	1.78126	-0.605934	-0.880164	0.255139	-0.573097	0.863913	0.114274	0.458515	0.59108	0.113065	-0.264424	1.05033	0.692101	1.19682	-0.363628	0.416754	1.13184	0.490034	0.832037	0.414639	-0.142791	-0.183219	-0.290196	-1.70529	-0.267597	0.53642	-0.0774047	-1.17708	-1.76438	0.14538	-0.154599	0.00587815	0.589608	-0.372863	0.17329	0.251689	0.147032	0.000161476	-0.816778	0.159316	-0.0225983	1.23617	-0.144289
TCGA-DQ-7589	B2b		Yes	Yes	Negative	-0.182979	-0.308695	-0.691428	-0.0741626	-0.279857	0.0108888	-0.264169	-0.137529	-0.385686	0.397496	0.276651	0.0126384	-0.708328	-0.345764	-0.950549	0.106759	-0.214862	-0.979673	-0.282176	-0.667285	-0.486862	-0.538149	-0.111027	-0.321659	-1.40082	-0.380284	-0.67019	-0.331637	-0.580276	-1.89202	-0.595581	-0.299711	-0.889969	0.0862843	-0.715221	0.276975	-1.15091	0.113034	-0.898087	-0.288727	0.0216606	-0.576408	-0.889885	-1.00901
TCGA-DQ-7590	B2a		Yes	Yes	Positive	-1.04355	-0.384173	-1.18179	-0.929272	-0.964174	-0.584104	-0.902748	-1.57612	-1.68079	-1.7328	-1.18002	-0.36051	-2.55208	-1.20996	-0.712492	-0.11368	-1.40818	-2.27518	-0.662765	-2.20277	-1.02897	-0.641815	-2.17152	-1.20969	0.531142	-2.67351	-0.67019	-0.11619	-0.542104	-0.0965002	-1.14897	-0.609346	-2.36192	-0.357037	0.666476	-0.116085	-1.60331	-0.76045	-0.0911142	0.506888	-1.8067	-1.31145	0.453183	0.378516
TCGA-DQ-7591	B2a	moderate	Yes	Yes	Negative	-1.52513	-1.35673	-1.57982	-0.818367	-0.788103	-1.28106	-2.92728	-2.39948	-2.13979	-1.54798	-2.16466	-1.90443	-2.06998	-2.95917	-0.451423	-1.75591	-3.72001	-1.59048	-2.70564	-1.24802	-3.11946	-2.69753	-2.60551	0.456481	-0.477145	-2.07421	-0.0985458	-1.42919	-0.304132	-0.656981	-1.70776	-2.37183	-1.52315	-2.40783	0.597399	-1.38747	-0.98984	-1.642	-0.149782	-1.18297	-0.298183	-0.675001	0.846724	0.792997
TCGA-DQ-7592	B1b	moderate	Yes	Yes	Negative	0.473919	0.479954	0.316924	0.678685	0.0539704	0.77566	0.346186	0.32125	0.323209	0.163595	0.878978	-0.639517	0.816953	-0.166975	-0.216916	-0.576404	0.606946	1.09399	1.03037	0.403548	-1.01359	0.513237	0.676421	0.371808	1.17785	0.0183675	-0.366395	1.23342	-0.883861	0.841559	0.575591	0.264864	0.1473	0.42802	0.485863	0.239623	0.0543926	1.18119	0.832052	0.559148	0.958182	0.905149	0.413922	0.69218
TCGA-DQ-7593	B2a		Yes	Yes	Positive	-0.0517582	-0.718992	0.176243	0.438767	-0.75027	-0.191907	-1.20196	-0.799688	-0.458201	-0.00710661	-0.610325	0.720928	-1.18602	-1.20875	-0.74773	0.865849	-0.452683	-1.07353	-0.334057	-0.946939	0.130417	-0.870156	-0.457307	-0.982764	-0.411999	-0.468371	-0.216459	-1.30325	-0.0902269	-0.194321	0.144898	0.206504	-1.51685	0.0273838	0.15034	-0.0710216	-0.654372	-0.608865	-1.01475	0.308163	-0.267292	-1.30667	0.290528	0.855614
TCGA-DQ-7594	B2a		No	Yes	Positive	-0.570498	-0.401545	-0.0861161	0.613621	-1.02882	0.0655944	-1.1535	-0.743977	-0.383979	0.877827	-0.867838	0.55298	-0.0651105	-0.707188	-0.703981	0.552102	-0.792086	0.115615	0.597791	-0.0437998	-0.578136	-1.08263	0.138403	-0.270754	0.946186	0.427073	-0.67019	-1.04035	-0.951939	0.422032	-0.208739	0.597658	-1.24289	-0.459944	0.413722	1.16791	-1.59356	-0.0867757	-1.09589	0.440189	0.554555	-1.02135	0.141972	-0.355861
TCGA-DQ-7595	B1a		Yes	Yes	Negative	-1.27608	-1.25812	-0.503354	0.632057	-0.936893	-1.34826	-1.03265	-0.598784	-0.418937	0.291313	-0.544974	0.405985	-0.153314	-1.36122	-1.30858	0.176024	-0.775427	-2.27518	0.3739	-0.630283	0.736752	-1.5866	-0.183362	-0.705688	-1.68405	-0.384954	-0.67019	-1.42919	-1.17708	-0.871138	-0.417456	0.0982267	-1.39787	-1.09613	-0.69346	-0.211074	-0.664202	-1.12761	-0.751979	-0.977909	-1.30182	-2.11147	-0.715022	-1.45593
TCGA-DQ-7596	B2a		No	Yes	Positive	-0.825099	-0.21323	0.0964832	0.740222	-0.483001	-0.780432	-1.63849	-0.194292	-0.316535	0.976177	-0.730356	1.18888	0.0725806	-0.927832	-0.179065	1.22612	0.188935	-0.579481	0.181087	0.406021	0.773773	-1.48455	-0.383423	0.347412	-0.0465954	0.556712	-0.67019	-0.848967	0.119781	-0.535015	0.543756	0.36841	-0.178841	-0.153432	0.285896	-0.28023	-0.493438	-0.193886	-1.45007	1.10536	-0.675959	-2.01667	0.386328	-0.0887703
TCGA-F7-7848	B1a	high	Yes	Yes	Negative	-0.287462	-1.28031	-0.813825	0.229248	-0.67132	-2.36422	-0.425328	-0.790735	-0.886552	0.84255	-0.526042	0.119628	0.0950641	-0.569128	-0.74181	0.0545839	-0.720062	0.435302	0.343666	-0.92628	0.323509	-0.766441	0.638736	-0.97142	-1.59669	-0.842592	-0.67019	-0.547043	0.605483	-0.93828	-0.600186	0.0852626	-0.781895	-0.282188	-0.0284909	-0.586707	0.103713	-1.25526	0.271208	1.06411	-0.0565726	-0.836222	-2.19635	-1.16274
TCGA-F7-8298	B1b	moderate	Yes	Yes	Negative	0.474739	0.482423	0.157378	-0.430305	-0.27482	0.419156	0.140303	-0.442447	0.347877	0.0692967	0.700335	-0.722347	0.142637	0.142655	0.0163074	-0.688232	-0.217588	0.677565	0.684229	0.125701	0.0940295	-0.462204	0.340307	-0.279092	-0.188511	0.0605948	1.26555	0.169992	-1.17708	-0.0621909	-0.269952	-0.127809	0.229983	0.935189	0.160116	-1.30487	-0.241192	-0.415561	0.0828842	-2.02248	-0.627714	0.848256	0.120468	0.461668
TCGA-F7-8489	A	low	Yes	No	Negative	0.642069	1.04934	0.609122	0.369875	0.331218	0.572629	0.73459	0.65787	0.569828	0.494829	0.341851	0.156962	0.530481	0.279052	0.0473573	0.0880393	0.550163	0.865992	0.866514	0.202156	-0.16413	0.597361	0.637226	-0.291561	0.520073	0.400156	0.834209	-0.0167528	0.983436	1.23166	0.934151	0.514552	0.782517	0.896147	-0.171951	0.175554	1.23716	0.416365	-0.206683	0.179405	0.69402	1.23387	1.16428	0.491802
TCGA-F7-A50G	A	low	Yes	No	Negative	0.930149	0.58097	1.69101	1.47352	1.60603	0.71054	1.03568	1.61818	1.2762	1.42456	1.1649	1.1263	0.380105	1.01123	0.979558	1.09482	1.31238	0.914087	0.719688	0.534298	1.09348	1.54406	0.274829	2.18198	1.13012	0.814458	0.281556	1.28123	1.47949	1.00463	1.62401	0.989163	1.36888	0.912601	1.48261	0.873762	1.39942	1.68672	1.14491	1.23456	1.33736	0.956232	0.671695	0.624096
TCGA-F7-A50I	B1b	moderate	Yes	Yes	Negative	-0.29511	0.121078	0.318012	0.744558	0.522923	0.394684	0.206992	0.000909322	-0.923575	0.975743	-0.0646088	0.652706	0.809431	1.41919	0.749307	0.631469	0.442989	0.472865	0.436991	1.09814	0.22447	0.364393	0.614827	-0.956731	0.589038	1.70089	0.549146	-1.42919	-0.763167	-0.983422	-1.33426	0.785869	0.485385	0.378905	-0.031058	0.435582	-0.93483	-1.09138	-0.311906	0.977993	-0.544695	0.134523	0.9892	0.382699
TCGA-F7-A50J	A	low	Yes	Yes	Negative	1.18911	1.04688	1.20202	1.16721	1.30456	1.03478	1.03836	1.37406	0.553313	0.500277	0.96171	1.07179	0.944349	0.833343	1.30179	1.27444	1.01775	0.807329	0.93735	1.27113	1.11071	1.22198	0.844658	0.81843	0.630307	0.811662	2.44844	0.0163907	1.63153	0.626697	0.873889	0.660222	1.59482	1.2415	0.50627	0.912412	1.31094	1.73993	1.0355	0.664257	0.648509	0.737019	1.68113	1.24432
TCGA-F7-A61S	A	low	Yes	Yes	Negative	0.614943	1.37388	0.764996	0.604602	0.873347	0.984497	0.623689	0.754972	0.298748	0.305806	0.726439	0.697106	0.653515	0.720489	0.786855	0.903904	0.544971	0.576654	0.657303	0.719283	0.39878	0.665502	1.10679	0.306866	1.29165	1.15538	2.76502	0.231769	0.59956	1.5753	0.446545	0.533143	1.01185	0.755149	0.397258	0.587562	0.475115	0.663331	1.81382	1.04692	0.354372	0.375507	0.566265	0.425414
TCGA-F7-A61V	B1a	moderate	Yes		Negative	0.187038	0.326241	0.367018	-1.11414	0.605903	0.388962	0.480446	0.727956	0.444006	0.296402	-0.0109811	0.23608	-0.907738	-0.390062	0.563162	0.363804	0.408628	-0.452332	-0.485981	-0.648866	0.944065	1.04258	0.332756	1.18226	-0.666017	0.386423	-0.67019	-1.13888	-1.17708	-1.41744	1.07406	0.284191	-0.165466	0.177705	-0.47533	0.62108	0.784455	0.319748	-1.07453	-0.443462	0.700089	-1.25941	-0.116224	-0.428357
TCGA-F7-A61W	A	high	Yes	Yes	Negative	0.274712	0.858555	-0.0348867	0.304346	-0.0562552	-0.105317	0.295772	-0.146961	-0.00934196	1.0145	0.242281	-0.0667327	0.511315	0.468663	0.466829	0.0316298	-0.598482	0.783077	0.336624	0.585052	0.774379	0.0342124	0.0369322	0.211368	-0.785122	0.35131	1.9099	0.381525	-1.17708	-0.787169	-0.18722	-0.308199	-0.450012	0.723669	-0.419193	-0.202512	-0.315395	-0.315462	-1.37906	-1.08918	0.399247	1.01068	-0.170148	0.637831
TCGA-F7-A620	A	moderate	Yes	Yes	Negative	0.478407	-0.268283	0.272095	0.917702	0.544943	0.220984	0.532617	0.237027	0.739531	0.577939	0.355627	0.806941	0.3319	1.24228	0.601495	0.932846	0.50891	-0.382134	0.596417	0.0663513	0.894708	0.673041	0.600388	1.06722	1.65852	1.06101	0.778835	-0.162586	1.86374	1.87621	0.672099	1.04546	0.883897	0.56485	0.534295	1.61257	1.29883	-0.035186	-0.028693	1.68118	1.01143	0.919913	0.344089	0.458115
TCGA-F7-A622	A	low	No	Yes	Negative	1.29006	1.07259	0.9845	1.91392	0.988912	0.628775	0.746011	0.971719	0.0527256	0.117348	1.4122	1.2559	0.886753	0.461551	1.54886	1.49551	0.711716	0.613386	0.569143	1.09278	0.956912	1.13567	0.0463425	1.14398	-0.66295	0.232695	0.306154	0.085606	0.393651	0.438068	0.688408	1.3262	1.19542	1.04098	0.0761061	1.83107	0.364186	0.038289	1.42035	0.930947	0.45837	0.289605	0.0181702	1.76005
TCGA-F7-A623	B1b	high	Yes	Yes	Negative	0.928067	0.146477	-0.000577964	-0.0937078	0.588671	0.872558	0.451629	0.322959	-0.341675	0.0968233	1.07834	0.739117	0.871226	-0.0470842	0.176028	0.772213	0.573665	-0.107719	-0.526693	0.825944	0.682434	0.647133	1.34412	1.83083	-0.0149095	0.362341	-0.67019	1.13847	-1.17708	-0.147115	0.211654	0.7109	0.570836	0.292799	0.898638	0.0886378	0.394483	0.0126648	1.41177	-1.12438	0.563302	-0.579793	0.319921	-0.107363
TCGA-F7-A624	A	low	No	Yes	Negative	-4.2449	1.01008	-3.43664	-2.31848	-4.47324	-3.42224	-4.05629	-4.21558	-0.0932261	-0.888229	-3.90144	-2.11611	-0.652393	0.480136	-2.18235	-2.07001	-6.43889	-2.27518	-4.73494	-0.583673	-0.808996	-3.97215	-3.00932	-2.14096	1.51777	-1.15534	-0.67019	-1.28729	-1.17708	-0.00862048	-3.22946	-1.91435	-0.341984	-2.73787	-3.06742	-3.25216	-0.656958	-0.701361	-0.792472	-0.276174	-2.61727	-1.86775	-1.67395	-1.86494
TCGA-H7-7774	A	moderate	Yes	Yes	Negative	0.871787	1.04653	1.37101	1.40309	1.70158	0.686278	0.682492	1.85156	1.33642	0.748775	0.951324	1.34953	0.505484	0.870563	0.715746	1.34002	1.97202	0.793667	0.276601	0.172876	1.18582	1.52437	0.551179	1.22678	1.15842	1.49832	-0.67019	0.212802	1.10891	1.23769	1.84328	0.425077	0.991107	0.530522	0.542447	1.44576	0.343734	0.410676	-0.342912	0.61625	1.01285	-1.42912	0.417324	0.180417
TCGA-H7-8501	A	low	Yes	Yes	Negative	0.217967	-0.42361	-0.100727	-0.0170663	0.0112362	0.39265	-0.0820065	-0.504922	0.827237	0.365688	0.359808	-0.321019	0.437177	1.38864	-0.298715	-0.362025	-0.263407	0.732405	0.441261	0.263184	0.242968	-0.594921	0.891526	0.557056	1.90843	0.182369	0.706748	1.23647	-0.466001	1.80953	-0.800689	-1.07052	-0.258942	0.469373	0.333078	0.0428737	-0.393123	-0.351146	0.855184	0.818364	-0.136019	1.33737	-0.636975	-0.689015
TCGA-H7-8502	A	moderate	Yes	Yes	Negative	0.241859	0.659351	-1.31728	0.209562	0.427562	0.536464	0.555716	0.21075	0.0197164	0.555128	0.208859	-0.678719	0.738388	0.654162	0.195973	-0.749614	0.424124	0.641274	0.391043	0.161943	-0.920348	0.00346692	0.424232	-0.210828	-0.103677	-0.146042	0.954759	-0.493089	-0.790976	0.367828	0.83327	-0.571391	0.817332	0.397439	0.0310663	-0.67832	0.754254	-0.138068	-0.556911	-0.865924	0.115417	0.073071	1.20908	-0.140525
TCGA-H7-A6C4	B1b	moderate	Yes	Yes	Negative	0.747431	1.83264	0.205838	1.43829	1.26917	0.891269	0.851002	1.14724	0.807287	0.0474704	0.804102	1.11488	1.09807	0.982173	1.37821	1.33371	0.935442	1.05931	1.35374	1.1777	0.770402	1.08488	0.00189851	1.81516	0.859722	0.977912	1.74405	1.03884	1.08149	1.21131	1.10332	1.15827	1.08149	1.12173	1.24048	1.56247	0.901058	0.680131	1.09593	1.63896	0.93629	0.963532	1.61254	0.941746
TCGA-H7-A76A	B2a	moderate	Yes	Yes	Positive	-0.98217	-0.184916	0.226809	0.133629	-0.289309	-0.324913	0.0490198	-0.475666	-1.31025	-1.10165	-1.3982	1.27369	-0.0927368	-1.64581	0.0621999	1.22184	-0.0343842	-0.609316	-0.422488	0.477722	-0.561509	0.170843	0.0398107	-0.354187	0.199069	-1.33384	-0.67019	-1.42919	0.122597	0.248543	0.344892	0.749529	0.543718	-0.161699	-0.10969	-1.16234	-0.657428	0.62862	-1.17833	0.811652	-1.34994	-0.16717	-0.0955709	-0.67569
TCGA-HD-7229	A	low	Yes	No	Negative	0.907593	-0.0168238	0.952251	0.355663	0.247864	0.45058	0.585597	0.419375	0.933522	1.09443	1.00881	0.0926566	1.26177	1.1824	-0.0537647	-0.0766546	0.561044	0.882771	0.811601	0.93566	0.651152	0.136038	1.0673	0.355146	1.00551	0.515016	5.16344	0.909294	-0.280633	0.536758	0.365281	0.770078	-0.329264	1.80668	0.766588	-0.564549	0.745024	-0.352826	1.47084	0.708315	0.577893	1.12468	1.46929	0.290013
TCGA-HD-7753	B1b	low	Yes	Yes	Negative	0.840607	0.583087	-0.167683	-1.00913	0.565999	0.472472	0.695366	0.601267	0.112204	0.514305	0.791813	0.355086	0.5923	0.37513	0.563235	0.304514	0.429613	1.39451	0.674012	0.757254	-0.500551	0.107043	1.01201	-0.786273	0.274322	-1.1807	1.32363	1.01535	-0.947044	-0.327028	0.104695	0.794334	-0.104762	1.02679	0.280951	-1.01677	0.834278	0.824347	0.83902	1.32292	0.333477	0.844297	1.16565	0.558267
TCGA-HD-7754	B2a	low	Yes	Yes	Positive	-0.587597	-0.71247	0.337077	0.750326	-0.526316	-2.14705	-1.82751	-0.944945	-1.59107	0.437064	0.04723	-0.276595	-0.057152	-2.12169	-1.53245	-0.0471964	-1.13424	-1.52853	0.48506	-0.572185	0.0254191	-0.887809	-1.06121	-1.26777	-1.58053	1.02094	-0.67019	-1.33411	-1.17708	-1.43891	-1.565	-0.522206	-1.51524	-0.632412	1.05508	-0.0430892	-2.14499	-0.452051	-1.29488	-1.22066	-0.772665	-0.855853	-0.801092	-0.91796
TCGA-HD-7831	B1b	moderate	No	Yes	Negative	-0.062151	0.402538	-1.64079	-0.525584	-0.174448	0.131699	-0.6568	-0.0953114	-0.178795	-0.954403	0.0440918	-0.980189	-0.164696	-0.346903	-1.02625	-0.938832	-0.415235	-0.0732997	0.341701	-0.690935	-0.783624	0.0410903	-0.737797	-1.61724	-0.10538	-0.767226	-0.67019	0.497634	-0.572565	-0.130871	-0.771033	-0.892776	-0.0640653	0.547299	-0.0444634	0.411768	0.0433027	0.856883	-0.112758	-1.30904	-0.231561	0.851699	-0.638997	0.0436788
TCGA-HD-7832	A	low	Yes	Yes	Negative	-0.320161	1.94114	-0.252039	0.640085	0.068903	0.794764	0.413568	0.0370567	0.605346	0.941925	0.0732201	-0.470897	1.12806	0.466826	0.457518	-0.684978	0.372071	0.757201	0.221504	0.611208	0.200398	-0.220393	0.404526	0.0178058	0.930276	0.963467	0.912932	0.817904	-0.212868	1.86805	-0.111511	-0.34967	0.512445	0.0791073	0.644259	0.996305	1.56769	-0.462579	-0.580543	0.755222	0.160877	0.170486	1.18778	0.228204
TCGA-HD-7917	B1a		Yes	Yes	Negative	0.717471	0.779699	0.148671	-0.86977	0.564618	0.149886	0.336126	0.593816	0.358153	1.32207	0.568088	0.842537	0.311267	0.796609	0.331829	0.888189	0.247932	0.733358	1.1147	-0.187487	0.732737	0.453747	0.124612	0.711538	0.413949	-0.605353	-0.383608	-0.272594	0.193508	0.407417	-0.184406	0.344797	-0.124849	0.697369	0.659118	-0.61514	0.476503	-0.0488771	-0.698174	1.3388	0.902158	0.534816	0.186493	-0.70217
TCGA-HD-8224	B1b	moderate	No	Yes	Negative	-1.86801	-0.715111	0.106953	-0.432679	-1.67179	-0.320012	-1.12634	-1.03673	-1.46584	-0.275812	-0.960268	0.115629	0.391338	-0.339494	-1.5855	-0.400668	-0.962689	-1.14242	0.845006	-0.441169	-0.542741	-0.0888313	0.18403	-0.451625	-1.37793	0.268537	-0.67019	-0.946264	-0.0947748	-1.43967	-0.500536	-0.317768	-0.228046	-1.52336	-0.876314	-0.490684	-0.844343	-0.269012	-1.2362	-1.75925	-2.0847	-0.352457	0.376583	-0.769432
TCGA-HD-8314	B2a	moderate	No	No	Negative	-1.0254	-0.87953	-0.123385	-0.29501	-0.0647366	-0.148828	-2.20459	-0.587597	0.0262813	0.932497	0.123036	-1.23985	-1.55396	-1.91758	-1.18499	-1.10478	-0.396098	0.725585	-0.964471	-1.8375	0.918436	-0.25049	-0.246685	-1.07251	-0.526293	0.104609	-0.67019	-1.42919	-1.17708	0.219964	-1.00146	-1.71066	-1.51658	-2.38959	0.264794	-0.516496	-1.81169	0.433361	-1.30272	-0.72869	-0.279476	-0.999315	-0.101912	-2.09007
TCGA-HD-8634	A	low	Yes	Yes	Negative	1.13862	0.968908	1.94236	1.80721	1.23205	1.16831	0.715564	1.47729	0.696471	1.36963	0.827603	1.02445	1.19412	1.14321	0.770291	0.988464	1.11329	0.891687	0.783152	1.35427	1.50256	0.920489	1.51591	1.33586	0.542882	1.0222	-0.290647	0.904767	2.20527	1.26943	1.0306	0.657025	1.22495	1.13746	1.34184	1.20202	0.981621	0.892589	1.98632	1.49105	1.49849	0.931234	0.669855	0.922323
TCGA-HD-8635	B1b	moderate	Yes	Yes	Negative	-0.0104199	0.80973	0.403247	-0.312333	0.434098	0.192714	0.411112	0.473531	0.400701	0.774477	0.251888	-0.184848	0.777784	0.888266	0.480454	-0.158497	0.284003	1.13381	0.584155	0.980085	-0.0712432	0.3664	0.529578	-0.0392382	-0.00491942	1.1165	0.166121	-0.00710464	0.176885	-1.59306	0.79941	-0.496447	0.121896	1.0836	0.477665	-1.05807	1.03581	0.274199	0.451316	0.508026	-0.173221	0.851363	0.920857	1.17283
TCGA-HD-A4C1	A	low	No	No	Negative	0.681416	1.72096	1.61869	1.06128	0.792872	1.07924	0.438809	0.799009	0.906067	1.90237	0.652424	0.744224	0.369752	0.872444	0.407108	0.645561	0.661736	0.165659	0.991794	0.433923	1.06049	0.508081	1.25093	1.58026	0.552754	0.666986	-0.373679	0.555506	1.76136	-0.21123	0.562099	0.12615	0.0605853	1.05017	1.10192	0.741612	0.215649	0.870575	0.395772	1.08651	1.61441	1.08138	-0.00621081	0.962658
TCGA-HD-A633	A	low	No	Yes	Negative	0.326501	0.516341	0.438112	-0.0165827	0.254537	0.888275	0.405357	-0.0966374	0.697395	0.51034	0.00383256	0.711197	1.30141	0.825914	0.454086	0.645536	0.411677	0.637897	0.596484	1.85419	0.636768	0.213605	-0.13116	-0.317705	-0.990415	-0.595747	0.499129	-0.0329354	1.11144	-1.12368	0.373566	0.302618	0.650026	1.37768	0.18949	0.343024	0.363093	-1.67092	0.375061	0.501056	0.626693	0.713537	1.01201	2.90856e-05
TCGA-HD-A634	B2b	high	Yes	Yes	Positive	-0.612271	-3.22953	-2.78872	-2.51279	-4.94168	-3.49525	-3.95994	-4.80462	-0.077739	-5.56019	1.06783	-3.17936	-3.61311	-0.99614	-3.68157	-3.0783	-6.21896	0.285564	-5.28011	-2.27742	-5.42369	-4.30669	-4.43808	-1.43234	-3.80776	-0.0107292	-0.67019	-1.42919	-1.17708	-3.75296	-1.87832	-4.12331	-1.26802	-2.35315	-3.02537	-2.05523	-2.15294	-4.63991	-0.361734	-2.037	-2.61727	-1.83366	-0.737819	-2.09007
TCGA-HD-A6HZ	B1b	moderate	No	No		0.38913	0.568599	0.493838	-1.31259	0.31199	0.33971	0.190445	0.169515	-0.32929	-0.220687	0.663997	0.30848	0.763485	-0.207779	-0.408258	0.330701	0.301147	0.873713	0.123354	1.07224	-0.271641	0.15951	1.682	0.409893	0.873101	-1.07487	-0.67019	1.05927	-0.55479	0.0467215	-0.486058	0.875683	-0.331426	1.50041	0.657095	0.436474	-0.581277	0.843158	-0.11499	1.48699	0.898587	0.021644	0.619776	-0.439115
TCGA-HD-A6I0	A	low	Yes	Yes	Negative	0.151063	1.20079	1.46936	0.818065	1.07455	0.528164	1.53989	0.904953	0.869393	-0.0796757	0.19474	1.288	0.662034	1.09414	2.86883	1.23023	-0.00612892	-0.223383	-0.508623	0.842959	1.24406	1.49649	0.633256	1.24253	0.119697	1.33832	0.383471	-0.229367	-0.160111	0.55466	1.24327	-0.00463833	0.696738	-0.275922	-1.2673	0.371641	1.29334	0.687939	0.428146	1.31673	-0.580414	0.888638	1.28327	0.0210574
TCGA-HL-7533	B2a	moderate	Yes	Yes	Positive	0.39553	-0.171861	0.327225	0.0929957	-0.165289	-0.723516	0.323358	-0.293221	0.170702	0.534082	0.422529	0.192258	0.224271	-0.273833	0.158212	0.523863	0.047758	0.94104	0.0590777	0.530643	-0.119323	-0.0841319	0.363826	-0.628197	1.03888	1.42805	-0.141431	0.487739	-0.498314	1.06236	0.625997	-0.0459627	1.29503	-0.391508	0.174413	-0.615069	0.0564769	-0.274136	-0.375495	0.594504	0.272502	-1.1039	-0.231946	-0.789115
TCGA-IQ-7630	A	low	No	No	Negative	0.967469	1.00487	0.614212	0.036312	0.38924	0.654448	0.405332	0.235817	1.3779	-0.0490027	0.832361	0.44588	0.921516	0.378924	0.0260576	0.285752	0.316279	1.04934	-0.066899	1.02733	0.798409	0.485087	-0.0736809	-0.93728	0.886066	0.189705	1.05862	1.53259	0.710104	1.4187	0.688355	0.527701	0.685021	0.512138	0.439075	-0.0678673	0.613398	0.284108	0.432396	-0.086397	0.516064	0.0948324	1.00613	-0.0406134
TCGA-IQ-7631	B1b	moderate	Yes	No	Negative	-0.467945	-0.351663	2.08656	1.02999	-2.24004	-0.792238	-1.34441	-1.93271	0.197842	-0.369666	-0.397652	-1.50102	-2.69787	-2.22138	-1.77897	-0.816895	-1.74158	-0.271555	-0.746378	-2.80139	1.33065	-1.99599	-2.17513	-1.61908	-1.90125	1.62649	-0.67019	-1.13217	-1.17708	-1.96704	-1.36921	-0.650079	-0.739902	-2.07927	-1.5434	0.526314	-0.256964	-0.150823	-0.795688	-3.35408	-1.73317	-0.592018	-1.88927	-0.95942
TCGA-IQ-7632	A	moderate	Yes	No	Negative	1.04965	0.798683	0.761538	1.36335	1.08993	0.932301	0.892256	1.50766	0.858485	0.663528	0.82144	1.18207	0.270939	0.459374	0.491794	1.19319	1.19715	0.615779	0.344427	0.030247	0.619649	0.928382	0.86403	0.429235	0.111848	0.790524	0.276306	0.980697	0.990233	-0.61585	0.978176	0.939513	1.02844	0.402786	0.00126093	0.165269	0.820961	1.51245	-0.606692	0.0598222	1.27247	1.01376	0.689713	0.882577
TCGA-IQ-A61E	A	low	Yes	Yes	Negative	1.0423	1.30653	0.428276	-0.369987	0.538154	0.73708	0.556305	0.35335	0.549251	0.517469	0.887342	0.501249	0.606437	0.960963	0.577914	0.70231	0.177977	0.659251	0.621572	0.87717	0.34348	0.195093	0.634311	-0.034725	1.03657	1.46556	1.26253	1.04431	1.01629	1.03884	0.232748	0.32272	0.502679	0.884875	0.434855	-0.0423425	-0.353694	0.333862	-0.0670526	0.7924	0.269856	0.528394	0.406639	0.541866
TCGA-IQ-A61G	A	moderate	Yes	No	Negative	1.01131	-0.235059	0.0965632	-1.11609	0.084769	0.730728	0.711291	-0.363953	-0.0824848	0.209214	0.698068	0.601661	-0.107819	0.45995	0.876633	0.843156	0.25364	0.226992	0.315256	0.649257	0.0139872	-0.144906	0.366339	-0.657031	-0.662561	-0.493688	-0.363925	-1.2797	-1.17708	0.191697	0.0777699	0.316751	1.05809	-0.558216	-1.34531	-0.409365	-0.467475	-0.673628	0.708946	-0.674767	-0.196001	0.202748	1.17665	1.09063
TCGA-IQ-A61H	B2b	high	Yes	No	Negative	-0.373328	-0.845097	0.113173	-0.219345	-0.586967	-0.0574317	-0.282622	-0.529309	-0.869668	-0.401553	0.0327151	-0.493667	-0.530864	-1.11492	-0.581273	-0.190308	-0.18928	-0.0370554	-1.02043	-0.108735	-0.505684	-0.935439	-0.170949	-1.16949	-0.395146	-0.243393	-0.67019	-1.42919	-0.188916	-1.38809	-1.69769	-1.01752	0.0543656	-1.46112	-1.17669	-0.156156	-1.72038	-0.608627	-0.422007	0.408681	-0.805356	-0.0277919	-0.806239	-1.1383
TCGA-IQ-A61I	B2a	high	No	No	Negative	-1.70735	-0.754851	-0.325223	-0.198293	-0.823831	0.092676	-1.46366	-1.35038	-2.06703	-2.35748	-2.08183	0.942637	-3.16362	-1.65286	-0.202201	1.39363	-1.19502	-0.912399	-0.70622	-1.94132	-0.90867	-0.766326	-1.17044	0.819996	-0.535035	-1.70043	0.0132934	-1.28479	-0.891549	-0.139939	-0.405431	-0.28187	-0.626584	0.134648	-0.758879	0.00740785	-0.464845	-1.78401	-1.42506	0.951664	-1.10611	-1.43308	0.480947	0.329054
TCGA-IQ-A61J	B1b	moderate	No	No	Negative	0.682671	0.795246	1.14662	0.873674	1.28842	0.622844	1.09716	1.45953	0.783664	0.222131	0.672694	0.717156	0.23944	0.461906	0.890551	0.950665	1.2018	0.970639	1.2549	0.721743	0.317006	1.33522	0.797942	1.07702	0.965698	0.872797	0.039345	0.441119	1.46352	0.956052	1.38574	0.73675	1.1436	0.90331	0.616107	1.09382	0.612115	1.03362	0.275333	0.608661	0.801706	0.22629	0.950292	1.76785
TCGA-IQ-A61O	B1b	moderate	No	No	Negative	-1.92787	-0.0464451	-1.11316	-2.24191	-2.98918	-1.94503	-1.22422	-2.61091	-0.279425	-2.25941	-2.67962	-3.05473	-2.03682	-1.03213	-2.68883	-3.10524	-2.79404	-2.27518	-1.22958	-1.79657	-3.18696	-2.43041	-2.09633	-2.07516	0.211168	-1.14835	-0.67019	-0.890157	1.74239	-0.0083445	-0.689108	-2.60342	-1.71442	-1.20545	-1.87515	-2.42456	0.0948752	1.12788	0.776598	-2.89821	-2.61727	-0.219094	-1.46227	-0.740589
TCGA-IQ-A6SG	B1b	high	No		Negative	0.529109	-0.389625	-0.793273	-0.532197	0.246873	0.641385	0.183401	0.00282635	-0.472183	0.0367872	0.430278	1.12317	1.08383	0.147168	0.313623	1.0427	0.498306	-1.27761	0.627995	1.07157	-0.443961	0.0406928	0.499283	-0.133365	-1.0292	-0.734749	-0.423253	-0.859503	-1.17708	-1.40858	-2.89184	0.699908	0.359601	1.34093	0.373052	-0.449453	-0.767264	-1.36536	-0.470847	0.297581	0.903755	0.379648	-0.42838	-1.53333
TCGA-IQ-A6SH	A	low	Yes		Negative	0.385863	0.622652	0.407857	-1.13152	0.874521	0.419635	0.97707	0.699796	0.502854	-0.751866	0.51661	0.851454	0.681123	0.998682	1.07355	0.802183	0.773031	0.208196	0.607971	0.963798	0.215342	0.901244	1.43598	0.921963	0.739754	0.486229	0.285054	0.388871	1.19996	1.26346	0.813253	1.07102	0.847011	0.625079	-0.0761468	0.527261	2.62912	0.154642	0.710398	0.425905	-0.153987	1.14374	0.464639	1.77097
TCGA-KU-A66S	B2b	high	Yes	No	Negative	-1.49909	-1.92403	-0.167761	-1.79524	-1.73647	-1.69844	-1.26079	-1.57037	-1.86507	-3.13959	-1.57206	-1.27334	-1.92889	-1.54262	-1.37727	-1.07264	-1.93328	-2.27518	-2.86202	-1.13273	-0.997639	-1.44902	-1.81166	-0.957178	-0.837792	-1.69517	-0.67019	-1.28241	-1.17708	0.214836	-0.203228	-1.11805	-1.69731	-0.754901	-2.03193	-1.92308	-2.30668	-2.76694	1.9614	-0.351766	-1.07179	-2.21834	-1.89457	-1.26794
TCGA-KU-A66T	A	moderate	No	No	Negative	0.719894	-0.706834	1.08796	0.23453	0.33661	0.390484	0.106922	-0.197313	0.466465	0.0568429	0.755152	0.326459	0.55841	2.17935	-0.221441	0.627271	0.253208	0.531525	0.880601	1.10736	0.176431	0.485786	0.450426	-0.50038	-1.75753	1.69635	0.108717	1.03325	0.25876	-1.7096	0.0820545	0.241925	1.21569	0.360303	0.374196	0.726732	0.114987	-0.459623	1.01991	-0.528984	-0.434188	0.24956	-0.271071	1.11314
TCGA-KU-A6H7	B2a	high	Yes	Yes	Positive	-0.712626	-1.11049	-0.196789	-0.826958	-0.886428	0.319128	-0.0427352	-0.692309	-2.18967	-0.857526	-0.730544	0.146612	0.2491	-0.264102	-0.0398958	0.447091	-0.151877	-1.95363	0.510088	0.39674	-1.39027	0.43453	-0.36131	0.288274	1.29177	0.201038	-0.67019	-1.42919	-0.90928	0.790622	-0.413258	0.428711	-0.657487	-0.274014	-0.741021	0.342326	-1.00483	-0.3368	-1.74283	2.20453	-0.69187	-1.63624	0.591952	0.0952109
TCGA-KU-A6H8	B1b	moderate	Yes	Yes	Negative	0.119134	0.480399	1.04676	0.23459	-0.703509	-0.141924	-0.581504	-0.384372	0.365732	-0.223663	-0.179727	0.595419	-0.978181	-0.971412	-0.479355	0.853215	-0.557643	0.173332	0.0694879	-0.8641	0.674005	-0.934674	-0.0865234	-0.469376	-0.171199	0.118135	-0.67019	-0.713141	1.26344	-1.29567	1.42224	-0.160524	-0.273743	-1.45037	-0.719834	0.69301	-1.00868	-0.00996519	-0.560685	-0.129818	-0.620595	-0.777757	1.36937	0.0309815
TCGA-MT-A51W	A	low	Yes	Yes	Negative	1.40324	1.77316	1.4321	1.574	1.43606	1.21073	1.04761	1.40937	0.616434	0.954241	1.06201	1.04028	0.798337	0.848369	1.18552	0.980459	1.13775	0.995647	0.481731	0.655415	0.918769	1.04422	1.13871	1.48189	1.08933	0.645228	2.02855	-0.0244284	0.655988	1.58596	1.08527	1.21961	1.19329	0.682972	0.698244	0.519263	0.268115	1.19886	1.01955	1.08582	1.28064	0.417939	1.50876	1.01008
TCGA-MT-A51X	A	moderate	Yes	No	Negative	1.27677	1.89438	1.24812	0.701078	0.881181	0.85735	0.788532	1.0835	1.16631	0.983502	1.16507	0.739126	0.826967	1.37364	1.21745	0.68788	0.643465	1.02923	1.1255	1.08846	0.645759	1.00592	1.36487	0.264311	0.119254	0.638422	-0.67019	1.20926	1.21497	1.12662	1.14071	0.678148	1.51885	0.399033	0.571144	1.34164	1.34166	1.72813	0.885227	0.37544	1.0264	0.847981	1.17924	1.97124
TCGA-MT-A67A	A	low	No	Yes	Negative	0.847209	0.913076	2.77577	1.4776	1.18108	0.566362	1.15633	1.57538	0.955455	0.966097	0.750773	1.116	-0.526023	1.16879	1.54366	1.65796	1.11946	0.341746	0.548392	0.232015	1.37902	1.34828	-0.113433	1.29626	0.379287	1.65094	-0.67019	1.37311	1.93726	-0.34276	0.66622	0.807061	1.20018	0.0436102	0.310696	0.880054	0.0676129	0.907516	0.5728	0.240102	1.04882	-0.0421608	-0.203769	1.40137
TCGA-MT-A67D	B1b	moderate	Yes	Yes	Negative	0.736628	-0.0926544	0.171116	0.552247	0.34821	0.714403	0.300514	0.262908	0.543802	0.33127	0.332209	0.794838	0.157144	0.387361	0.874579	1.01366	0.0417449	0.755572	0.41221	-0.0403146	0.462264	0.462491	0.35185	0.906585	-0.298074	0.214918	0.0509538	0.577631	0.538096	0.621653	0.420608	0.542873	0.584625	0.751262	0.382835	0.973637	0.559473	-0.37313	0.348573	1.25898	0.896097	0.281032	0.532124	-0.18455
TCGA-MT-A67F	A	low	No	Yes	Negative	1.22684	0.972824	1.81492	2.00646	0.679926	1.12303	0.549809	0.640223	0.863541	1.42949	0.88544	1.09428	0.934071	0.39078	0.926763	1.15547	0.53098	0.860086	0.464016	2.11184	1.13313	0.58131	0.682512	1.1201	1.38983	1.03653	2.9887	1.67783	1.60763	1.73465	-0.120776	1.55129	0.583633	0.887724	1.01359	1.57509	0.54251	0.395649	1.54781	2.9819	1.40106	0.907163	0.965103	1.19735
TCGA-MT-A7BN	B2b	moderate	No	Yes	Negative	-1.9546	-1.13004	-0.550343	-2.54622	-2.66892	-1.56977	-2.03353	-2.51005	0.208591	-2.5838	-2.60801	-0.223193	-2.69068	-0.703207	-2.04179	-0.484943	-3.87219	-0.754242	-2.87486	-1.93284	0.183363	-1.79639	-1.98621	-1.93993	-0.655054	-0.913023	-0.67019	-0.339192	-1.17708	-0.602734	0.458579	0.834316	-2.51671	-0.764748	-1.74234	-2.44052	-1.01474	-0.394414	0.565145	-1.05662	-2.61727	-2.16042	-1.60616	-2.09007
TCGA-MZ-A5BI	B2b	high		Yes	Negative	-0.0177489	0.363234	0.291974	0.183313	0.130674	-0.122196	0.173518	0.401941	0.611713	-0.846526	-0.45313	0.715589	-0.369138	-0.500669	-0.541486	0.775383	0.0624077	-0.358775	-0.717331	-0.316524	0.15364	0.283709	-0.256539	0.920491	-0.182006	-0.0815316	-0.67019	-1.25779	-0.273278	0.388226	0.472388	0.525025	-0.393109	0.373898	-0.898694	-0.37982	-0.26957	-0.145553	0.345927	0.137507	0.190855	-0.821308	1.61126	1.3705
TCGA-MZ-A6I9	B2a	moderate	Yes	Yes	Positive	-0.64398	-1.06383	0.778622	0.90726	-1.09021	-0.925112	-1.2761	-0.375979	-0.636459	-0.520711	-0.561754	0.785724	-0.410399	-1.66441	-0.461326	0.801998	-0.923948	-0.326557	-0.678052	-0.0614756	1.26343	-1.29915	-1.1876	-0.301521	-1.48739	0.120827	-0.67019	-1.42919	0.344745	-1.3504	0.78823	0.279106	-0.656139	-0.971521	-2.46233	-0.184745	-1.31467	0.00240579	-0.639835	-1.26474	-1.15442	-2.09261	0.33874	-0.054252
TCGA-MZ-A7D7	B1b	high	Yes	Yes	Negative	0.882776	1.28794	0.714718	0.525534	0.345771	0.553513	0.315798	0.509248	-0.172276	1.63129	0.496878	1.46173	0.0545589	1.43133	0.518899	1.62234	0.130589	0.397192	0.796865	0.869686	0.398362	0.424265	0.174632	1.20623	-1.21912	0.714963	-0.67019	-0.565365	1.29053	-0.177598	0.157077	0.735155	1.53586	0.866493	0.509832	0.175147	-0.145105	-0.0790889	0.500084	0.641844	0.362273	0.391627	1.0578	0.577386
TCGA-P3-A5Q5	B2a	moderate	Yes	Yes	Positive	-0.711177	-2.4735	1.09344	-0.00202377	-1.66494	-0.825455	-0.235133	-1.05397	-1.93325	-0.912144	-0.956005	0.367067	-0.619009	-1.99817	0.524729	0.821815	-1.24085	0.191488	0.76512	-0.130842	-1.39673	0.516942	-0.400161	-1.25396	-0.345117	0.192865	-0.67019	-0.915762	0.975332	-0.100943	0.314376	-0.0024325	0.46737	-1.45753	-0.188933	0.0496569	-0.234391	0.428215	0.534559	0.0612623	-1.24955	-1.43116	0.0765771	-0.709608
TCGA-P3-A5Q6	B1b	high	Yes	Yes	Negative	-0.484779	-0.770587	-0.752181	-0.709365	0.258432	0.166075	0.477439	0.157995	-0.153135	-0.598399	-0.0852282	-0.450942	-1.05611	-0.101337	0.0250101	-0.0403868	0.61736	0.338614	-0.601387	-0.204026	-0.436883	0.579816	-1.30542	-0.840449	-0.792598	0.583306	-0.67019	-1.42919	-1.17708	0.351934	-0.279517	-0.329967	0.599445	0.0977537	-1.31308	0.0741865	0.27006	-0.130278	0.0789873	-0.854646	-0.997368	0.615447	-0.60426	0.658344
TCGA-P3-A5QA	B1b	moderate	No	Yes	Negative	-0.948181	0.898859	0.520998	-2.27839	-0.800129	-0.564095	-0.385244	-0.999039	-0.227252	-0.42177	-1.04776	-1.77261	0.435385	1.53001	-0.867522	-1.28182	-0.798495	0.179445	-0.0410374	-0.267034	-0.591701	-1.33786	-0.00456049	-1.35988	0.691322	-0.898931	3.22866	-0.865655	-0.887069	0.211845	-0.542349	-1.47354	-1.27515	0.903766	-1.59127	-2.13466	0.0719724	-0.454406	-0.00570934	-1.53799	-2.28459	0.840665	0.0872368	0.530872
TCGA-P3-A5QE	B2a	moderate	No	Yes	Positive	-0.822788	-2.6315	-0.54576	0.0261758	-0.697489	-1.64929	-1.09489	-0.851973	0.681975	-0.988232	-1.03855	-0.0309709	-0.839835	-1.36915	-1.21419	0.146763	-0.806866	-1.97236	-0.554825	-0.631831	-1.28391	-0.633247	-1.02031	-0.233644	0.404115	-0.747737	-0.67019	0.661823	-1.17708	0.156574	-0.24079	-0.743601	-0.750235	0.37338	0.854569	-1.03108	-0.880411	-0.969122	-1.94971	1.57263	0.116306	0.649383	1.2507	-0.711836
TCGA-P3-A5QF	B2a	moderate	No	No	Positive	0.225778	-0.931084	1.15977	0.294185	-0.0655606	-1.27075	-0.27868	-0.046628	-1.19181	1.18104	0.371151	0.411234	0.0428358	-1.00096	0.124096	0.70692	0.0268495	0.231926	1.16701	0.828416	0.422059	-0.0157574	-0.0601475	-0.326248	0.459717	0.33812	-0.67019	-1.27681	-0.229637	-0.58514	0.229381	-0.547953	-0.34246	-0.961045	-1.13727	0.843255	-0.47395	0.210117	-2.10378	1.36738	-1.08712	-1.97887	0.109676	-0.814863
TCGA-P3-A6SW	B2a	moderate	Yes	Yes	Positive	-1.58028	-1.27462	1.09	0.033456	-1.33899	-0.921649	-1.35884	-1.6275	-0.493248	-1.07958	-0.974775	0.679142	0.218826	-1.29641	-0.332159	0.696833	-1.55823	-0.816108	0.694491	0.26625	-0.400327	-2.10366	-0.325663	0.215303	-0.610762	-2.56631	-0.00798285	-0.92993	-1.17708	0.215873	0.414129	0.491314	-0.347865	-0.746212	-0.142621	-0.213697	-1.10021	-0.565451	-1.07464	-0.266025	-0.278545	-2.77704	-0.294388	-1.42232
TCGA-P3-A6SX	A	moderate	Yes	Yes	Negative	0.399772	0.677364	0.309169	0.300941	0.582799	0.522704	0.498666	0.392411	0.917726	-0.417645	0.372278	0.519219	0.11803	0.0492293	0.183238	0.399282	0.430982	0.825005	0.528713	0.0543025	0.0836024	0.774703	-0.0458903	0.557449	-0.938491	0.616694	2.05151	1.29504	0.306637	-0.51295	1.27264	0.898187	0.246308	0.453783	0.21197	-0.146992	-0.263503	0.283855	-0.965707	-0.833822	-0.000922252	0.909751	0.728393	-0.41571
TCGA-P3-A6T0	A	moderate	Yes	Yes	Negative	1.06741	0.0307541	1.66964	-1.52494	0.171363	0.527311	0.440177	0.253225	0.221416	0.45274	1.00542	-0.536191	0.519514	1.08045	0.689606	-0.247852	0.470624	1.47768	0.101558	1.05718	1.02735	-0.246215	0.585659	-1.10888	-0.82826	-0.823	0.0543844	0.362961	-0.603037	-1.28566	0.615765	-1.39525	0.487323	0.748948	0.558944	-2.19708	0.0813615	0.208963	-1.10809	-2.84461	-0.991827	0.30288	0.742292	0.0581211
TCGA-P3-A6T2	A	low	No	Yes	Negative	0.0653935	1.29879	0.428268	0.592937	0.338709	0.62205	0.378892	0.157962	0.384732	1.03707	0.0419111	-0.260255	0.694644	0.670411	0.064104	-0.198296	0.159108	1.0185	0.375847	0.951136	0.569493	0.00404225	0.42996	-0.65576	-0.166284	-0.782728	0.754715	0.535058	-0.172236	0.331432	0.262877	-1.49621	-0.119887	0.554236	0.379194	-0.120078	-0.201848	-0.0351015	-0.282527	0.701633	-0.0776021	1.6129	1.4544	-1.56623
TCGA-P3-A6T3	A	moderate	No	Yes	Negative	0.308332	-0.476566	1.03031	0.727281	0.619895	0.770147	0.807428	0.779409	0.689705	0.651079	0.23938	0.60021	1.47895	1.5845	1.41407	0.754229	0.401594	1.0509	1.1447	2.24295	0.338319	0.85901	1.3571	0.811836	-0.0587494	0.851291	1.06848	1.07506	0.806825	0.0994551	0.583467	0.173306	0.833764	0.967536	0.838182	0.592117	0.390962	1.40476	0.335706	1.66271	0.622558	1.02648	1.02617	1.39686
TCGA-P3-A6T4	B1b	high	Yes	Yes	Negative	1.20709	0.256118	0.857644	0.741582	0.869322	1.49938	0.445611	0.922766	0.84182	1.0386	0.85021	1.14373	1.03813	-0.232442	0.895349	1.1622	0.799812	0.539759	1.20224	1.56064	0.607704	0.995135	0.567351	0.547089	-0.025169	0.229095	0.821897	1.33866	2.34909	-0.226197	0.785741	1.12372	1.14045	0.630041	0.844831	0.556816	0.417284	0.766573	-0.38935	0.887322	1.08107	1.04616	0.41456	1.21865
TCGA-P3-A6T5	A	moderate	Yes	Yes	Negative	0.81184	0.267088	1.45459	0.710316	0.660714	0.522163	1.06363	0.882668	0.460701	0.497925	1.0747	0.908756	-0.541699	0.730475	1.37801	1.00762	0.384738	0.927235	0.356937	0.0400889	0.114315	0.991093	-0.181218	0.920594	-0.731157	0.931071	2.2045	0.711463	-0.232763	0.316983	1.49319	1.54694	0.347806	0.815088	-0.114852	-0.549571	1.7255	0.883915	0.119041	1.15254	0.0603025	0.18638	1.19246	1.59393
TCGA-P3-A6T6	B2a	low	No	Yes	Positive	-2.62286	0.760978	0.799439	1.07501	-1.21873	0.414605	-0.0339022	-1.30912	-0.322484	-1.63354	-2.45406	-0.249714	-0.324713	-0.0756337	0.138848	-0.238026	-0.897076	0.476795	0.406656	-0.448811	-0.930795	0.328791	0.00511996	-0.0365656	-1.29162	-0.79596	-0.67019	-1.42919	1.05421	-1.22732	0.011526	-0.541822	0.430652	-2.44023	-2.14293	1.84384	-0.0385798	-3.19498	-0.88843	-1.25599	-1.37591	-2.66919	0.399206	-1.06454
TCGA-P3-A6T7	A	low	Yes	Yes	Negative	0.910146	0.877608	0.297894	1.12494	1.1708	1.13105	0.719008	0.581508	1.27325	0.900323	0.446249	1.15873	1.35989	0.80744	0.80151	1.2159	0.908561	0.842978	1.0316	2.2048	-0.0342424	1.11386	1.44835	0.992232	0.684602	1.00006	1.10415	0.937656	2.07173	0.551278	1.36427	1.41555	1.2375	0.83866	1.08589	2.04633	0.576096	-0.150548	-0.585933	1.34801	0.936074	-0.374265	0.0936845	0.697289
TCGA-P3-A6T8	B1b	high	Yes	Yes	Negative	0.234623	-0.452326	0.9624	-0.171043	-0.640703	0.193447	0.0843379	-0.360087	0.455582	-0.0161673	0.289758	-0.957311	0.349964	0.299711	-0.226527	-1.09955	-0.0464485	0.419186	0.324445	0.585549	-1.23727	-0.907742	-0.835237	-0.854644	-1.12517	0.152431	-0.318526	-0.908814	-0.419709	-0.0530288	-0.361095	-1.23433	-0.705486	0.388123	-1.4952	-1.19806	-0.688552	-0.686199	-1.07156	-1.9665	-0.306282	0.875136	0.74794	0.696792
TCGA-QK-A64Z	A	low	No	Yes	Negative	0.987459	1.2644	0.293819	0.496763	0.112618	0.724765	0.616892	0.203019	0.628119	0.429048	0.934862	-0.157139	0.291693	0.391523	0.290275	-0.147434	0.621851	0.0642355	0.800417	0.101034	0.938836	0.396057	-0.0910707	-1.78288	0.833659	0.178048	-0.385333	-0.662878	-0.902139	1.04266	0.0559163	0.32136	0.921427	-0.701744	0.648786	0.00362739	1.07328	0.335587	0.0758038	-1.43969	-0.35642	0.726174	-0.105334	1.44129
TCGA-QK-A652	B1b	moderate	No	Yes	Negative	0.770096	0.460663	1.23463	0.891286	0.890317	0.596079	0.675202	0.919223	1.05721	0.591044	0.920207	0.8219	0.534751	0.904703	0.68979	0.950565	0.477444	0.625864	1.11858	0.271195	0.773582	0.899695	1.17847	1.34988	0.930164	1.34582	0.325856	0.638442	2.13635	1.43608	0.926131	1.00041	0.642963	0.838634	1.01985	1.62728	1.43277	0.736757	1.15949	1.00595	0.90953	0.263698	-0.190904	1.62502
TCGA-QK-A6IF	B2b	high	No	Yes		-1.99797	0.0246473	-0.458898	-0.879758	-1.45847	-1.14483	-0.4563	-1.87375	-0.150439	-1.60938	-2.0912	-0.958309	-2.65012	-1.91905	-2.16326	-0.547369	-2.36849	-0.3319	-2.19282	-2.42971	-1.93911	-1.42231	-2.37387	-0.200726	-0.0670592	-1.924	-0.261708	-1.09755	-0.521324	0.024546	-0.488881	-0.949478	-2.22071	-0.911742	-0.808918	-1.56416	-1.23193	-1.10039	-0.676241	-1.03665	-1.28975	-1.5341	-0.705215	-0.366809
TCGA-QK-A6IG	A	high	Yes	Yes		-2.64965	0.247991	0.79197	-1.38824	-0.523678	-0.216471	0.412195	-1.02115	-0.9875	-0.769943	-1.84544	-1.70281	0.213426	0.927663	0.317345	-1.47369	-0.514738	-0.353423	-1.56621	0.506047	0.517309	-0.686907	-0.684386	-0.272371	0.9549	-0.0672319	0.664854	-0.626773	-1.17708	0.0234297	-0.823749	-1.14206	-0.916691	-0.306618	-2.05382	-0.981174	-1.99786	-1.03854	1.13558	-1.77113	-2.37471	-0.49704	-0.0151486	-0.572443
TCGA-QK-A6IH	A	low	No	Yes	Negative	1.10338	0.46636	0.703618	0.368002	1.03593	-0.0494275	1.37905	1.08225	0.264799	1.14649	1.18056	0.941182	1.03422	1.16513	2.08523	0.808772	0.430221	0.597979	0.942219	1.36859	1.10398	1.52047	0.722872	-0.110168	-1.15643	-0.817416	-0.284065	-0.0215417	0.425906	-0.690993	1.45936	0.790714	1.58439	-0.118596	-0.889672	0.378125	0.445978	0.712136	1.64322	0.309583	-0.743837	0.678192	0.636411	1.01913
TCGA-QK-A6II	A	low	Yes	Yes	Negative	0.898817	0.779457	2.33007	1.31071	1.041	0.762945	1.34829	1.05048	1.37245	-0.00645347	1.01416	1.7282	1.65602	1.57267	2.07104	1.48882	0.491223	-0.208901	0.696014	2.29514	1.96022	1.78693	1.10022	1.80661	0.316792	2.22618	0.985495	-0.993962	1.83376	1.19658	1.52918	1.80489	1.38312	0.961014	-0.151283	1.88592	1.46202	-0.523669	2.41907	2.01064	0.150246	-0.103801	0.823094	2.24923
TCGA-QK-A6IJ	A	low	Yes	Yes	Negative	0.646433	-0.237429	1.94247	0.426516	0.473947	0.440933	1.03072	0.651251	0.59546	-0.412938	0.547737	1.48117	0.660285	0.715727	1.84418	1.81626	-0.0399212	-0.948017	-0.0416061	0.717859	1.3864	1.26517	0.70463	1.24877	0.236862	1.62553	0.782843	-0.505652	1.51652	-0.00312616	1.38315	1.47767	0.857561	0.834723	-2.68545	0.800195	1.5088	-0.0565778	2.63288	0.284564	-1.33796	-0.230224	-0.309693	0.575644
TCGA-QK-A6V9	B2a	moderate	No	No	Positive	-1.38055	-1.18136	-1.00471	0.749324	-0.699417	-1.02214	-1.4426	-0.761412	-1.61915	-0.461757	-1.28301	0.170546	-2.24252	-1.81169	-1.66065	0.253123	-1.16232	-1.63681	-1.00417	-2.01788	-0.309753	-1.09047	-0.786884	0.228936	0.918224	-1.09782	-0.67019	-1.20651	-0.583938	-0.493766	-0.298464	-0.819262	-0.392994	-1.37001	0.601475	-0.161915	-0.967594	0.244707	-1.94936	-0.0272243	-0.891312	-2.3762	0.361471	-0.895956
TCGA-QK-A6VB	B1a	low	Yes	No	Negative	-0.327816	-2.0602	-0.528963	0.277084	-0.334033	-1.89961	-0.0200324	-0.318393	-2.04342	-0.998703	-0.31162	0.139417	0.00285018	-0.325515	-1.16203	0.121561	-0.721875	-0.725811	-1.52709	-0.623943	0.794374	-0.457406	-0.629557	-0.746708	-1.32488	-0.361811	-0.67019	0.395249	0.552882	-1.70084	-1.17696	-0.370745	-1.17105	-0.278667	-0.448606	-0.538425	-0.822189	-0.138936	-1.57678	-0.641762	-0.0449778	-1.68629	-3.79724	-1.64995
TCGA-QK-A6VC	A	low	Yes	No	Negative	0.941744	-1.0554	0.969164	0.403703	-0.0184465	-0.225561	-0.511568	0.100629	-0.951718	0.380292	0.558817	1.22198	-0.165877	-1.01702	0.307483	1.23904	-0.00505265	-0.48956	0.219881	0.412631	0.321349	-0.0984132	0.83404	-0.13489	0.322507	-0.275027	-0.67019	1.81987	1.70817	0.650263	0.484523	1.23701	0.264038	0.563765	0.015855	0.0107154	0.287272	-1.176	-0.418943	1.42696	-0.186633	-1.37718	1.33792	0.432057
TCGA-QK-A8Z7	B2b	high	Yes	Yes		-1.968	-1.36994	-0.653423	-0.88423	-1.12505	-1.11732	-0.939258	-1.51464	-1.46461	-1.74113	-0.607589	-1.34424	-2.09728	-1.41942	-2.01969	-1.0178	-1.26665	-1.14524	-1.29886	-1.84187	-1.75779	-0.961462	-1.63674	-1.09785	-2.35455	-0.0881047	-0.67019	-1.09388	0.655235	-1.13354	-1.58746	-2.02032	-1.93042	-1.47476	-0.772732	-0.437845	-0.917983	-1.29013	-2.4385	-1.47869	-0.107436	1.50348	-3.30717	-2.09007
TCGA-QK-A8Z8	B1a	high	Yes	Yes		-0.207147	-1.49496	-0.00178165	-1.11611	-0.102326	-0.439907	-0.300664	-0.614106	-1.7938	-0.620553	-1.44684	0.7439	-1.16246	-0.815266	-0.477196	0.844895	-0.581702	-0.395496	-0.0728655	-0.929093	0.0971906	-0.332203	0.94909	0.144165	-1.12302	-0.467564	-0.67019	-0.496247	0.28366	-0.821744	-0.364018	0.136276	-0.741497	0.279027	-1.07628	-0.315888	0.149864	-2.19372	-1.08814	-1.32414	0.995356	0.54636	-2.4785	-1.47755
TCGA-QK-A8Z9	B1b	high	Yes	Yes		-0.236764	-0.246659	0.37417	-0.711853	0.269525	-0.710471	0.541066	0.327581	0.154917	0.54028	0.210717	-1.74285	-1.62564	-1.30463	0.246777	-1.09162	-0.134758	0.766793	1.04315	-1.17003	-0.224779	0.335461	0.366105	-1.03101	0.2823	-0.640744	1.90568	0.683826	0.0825766	0.551165	1.1236	-1.07311	-0.324672	-0.303456	-0.364128	-0.429266	0.234036	0.905603	-0.870916	-1.06659	-0.979193	1.09932	-0.646847	0.756582
TCGA-QK-A8ZA	B2b	high	Yes	Yes		-0.324593	-0.511861	-0.589164	-0.59846	-0.246879	0.636223	-0.288876	-0.198501	-0.0754723	-0.524684	-0.435283	-0.450509	-1.10848	0.0960051	-0.905072	-0.43589	-0.0722064	0.524043	0.478381	-0.3508	-1.99221	-0.26614	0.254692	-1.41498	-0.565147	-0.311262	-0.34301	-0.792556	-0.319057	-0.604366	-1.04578	-0.874807	-0.313221	-0.0329251	-1.38517	0.522775	-1.13779	-0.138099	-0.956949	0.0795983	0.0102198	0.136962	-0.0228684	-0.867947
TCGA-QK-A8ZB	B1b	moderate	Yes	Yes		0.830338	-0.0218442	0.417738	0.655516	0.630433	0.780354	0.461816	0.548449	0.935058	0.583399	0.772068	0.767379	0.782793	0.599583	0.115975	0.730191	0.633238	0.42591	0.716781	1.28631	0.0766414	0.674461	0.715357	1.78435	-0.72172	0.809736	-0.67019	1.75534	0.315795	-0.894384	0.68094	0.25462	1.18515	0.817944	1.02827	1.03761	0.626265	-0.252978	-0.620667	0.642178	0.980465	1.21444	0.116604	1.32706
TCGA-QK-AA3J	B1a	low	Yes	No		-0.858124	-0.904861	-0.000758268	0.541476	-1.12916	-1.90368	-0.485457	-0.987202	0.0954424	-0.0957323	-0.722296	-0.190526	-0.552109	-1.61714	-1.25089	-0.00276805	-0.683822	-0.737125	0.410812	-1.18039	-0.518665	-1.51821	-0.303951	-0.347818	-0.155361	-0.430015	-0.67019	-1.04239	-0.2678	-0.467822	-0.122772	0.318691	-1.53183	-0.551321	0.643368	-0.264588	0.10236	0.146326	-1.48641	-0.795423	-1.99393	-1.72246	0.433875	0.103192
TCGA-QK-AA3K	B1b	high	Yes	Yes		-0.851333	-0.255947	-2.20205	-2.82854	-3.24273	-2.04228	-1.37497	-3.15721	-0.227516	-1.76887	-1.72445	-3.15091	-3.07251	-1.70459	-1.94653	-3.29726	-3.90439	-1.14449	-2.58562	-1.95746	-3.25273	-2.13528	-3.27456	-1.83356	-0.42909	-1.97011	0.047881	-1.42919	-1.17708	-0.193246	-2.3725	-3.22467	-1.48291	-2.01637	-2.9378	-3.25216	-0.825447	-1.01626	-1.6686	-2.2787	-2.61727	0.692436	-1.37609	-0.718798
TCGA-RS-A6TO	B1b	moderate	No	No	Negative	0.36908	0.972781	0.659238	-0.216526	0.603269	0.643507	0.487026	-0.118168	0.720374	-0.275429	0.560081	-1.49546	0.0665284	0.959554	0.0842455	-2.27864	0.527063	0.433495	0.542381	0.423072	0.106546	0.61692	0.13164	1.72818	0.929299	1.32148	-0.190675	-0.0774635	1.05376	1.3283	-0.430551	-1.07321	0.31298	-0.840323	-0.113586	-0.0618769	0.285857	-0.587938	2.04853	-0.17012	-0.430386	0.653111	-0.370919	1.19418
TCGA-RS-A6TP	B2a	moderate	Yes	Yes	Positive	-0.102715	-0.585921	1.20244	0.309441	-0.787237	-1.09496	0.345832	-0.352682	-2.54872	-0.367172	-0.183458	0.221026	0.0852351	-1.09077	-0.147211	0.212884	-0.21066	-1.0879	0.344913	0.194705	-0.904564	-0.385332	0.928888	0.10009	0.811957	-2.07607	1.89011	2.51594	0.0125661	0.665342	0.686597	0.0541278	0.686759	-1.40769	0.470961	-0.939015	-1.97548	-2.22387	0.5402	0.793783	0.600195	-1.02974	0.951149	-1.32557
TCGA-T2-A6WX	A	low	No	Yes	Negative	-0.280181	-0.360958	1.21989	-0.193708	0.00571723	0.300487	0.542463	-0.213875	0.0989565	0.163071	-0.752331	-0.674742	0.274316	0.765525	0.0788888	-0.614916	0.0502413	0.191552	0.174288	0.456541	0.440599	-0.0475089	0.742234	0.591928	1.44788	0.708856	1.74711	0.377018	-0.179566	1.05408	-0.0386053	-0.224116	0.852987	-0.643218	-0.640092	0.498079	0.153242	-0.210149	0.946014	0.745887	-0.601662	0.472396	-0.433787	0.3612
TCGA-T2-A6WZ	A	moderate	Yes	Yes	Negative	-0.257359	0.345258	0.612824	-0.174904	-0.0352124	-0.55838	1.09954	0.198287	0.576725	-1.11647	0.270622	0.981674	-0.568941	0.684691	1.92947	1.01208	-0.06683	-0.216337	-0.29709	0.486483	-0.359206	0.772223	1.6005	-0.465584	-0.706404	0.0515391	1.56881	-0.561436	-0.585496	0.900939	1.04263	1.17152	0.359889	0.351073	-2.4697	-0.143654	0.429098	0.528375	0.472226	0.592718	-0.900431	0.341898	1.756	0.106444
TCGA-T2-A6X0	B2a	high	Yes	Yes	Positive	-0.908167	-1.17779	-0.34118	-0.732883	-0.579497	-2.20434	-2.24068	-0.597842	-0.516593	-0.519956	-0.0883603	0.0260898	-0.70221	-2.18509	-2.16796	-0.235828	-0.343597	-1.64551	-2.35868	-0.138418	-1.39497	-1.57219	-0.65456	-1.02438	0.0230378	0.413232	-0.67019	-1.42919	-1.17708	-0.275003	-2.9162	-0.736364	-1.62053	-2.89596	0.0386238	-0.637413	-2.39353	-1.03496	-2.19978	-1.06308	-1.51714	-1.2254	0.339007	-1.91764
TCGA-T2-A6X2	A	low	Yes	Yes	Negative	1.14607	0.984806	2.18588	0.0718841	1.34071	0.829189	1.0079	1.37683	1.01547	0.898346	0.710562	0.262774	0.868718	1.2055	0.828168	0.223196	1.07823	1.04901	0.80669	1.05189	0.944523	1.10468	0.847109	0.179272	1.58132	1.47052	-0.193445	-0.556933	1.41433	1.50061	0.280301	-0.0109203	1.08649	0.0723705	0.482667	0.705081	1.38335	0.135112	-0.256662	0.634694	0.727972	1.08345	0.398007	1.25308
TCGA-T3-A92M	B1b	moderate	Yes	No		-1.70333	-0.459454	0.0327427	-0.941629	-0.789639	0.24422	0.0849058	-0.978238	-0.30825	-0.649645	-1.23344	-0.805783	-1.19535	-1.1108	-0.673402	-0.744161	-0.796931	0.0397054	-0.310514	-1.23106	-0.880835	-0.145075	-1.09083	-0.752829	0.508805	0.120619	-0.363813	-0.224468	-0.881369	0.537251	-0.929696	-0.545467	0.479178	-0.732609	-0.657194	-1.0671	0.0939255	-0.0136133	-0.869212	0.10949	-0.445642	0.797739	-0.714512	-0.0999944
TCGA-T3-A92N	A	moderate	Yes	No		-0.576111	0.572388	0.827677	-1.11757	-0.192523	0.45807	-0.047499	-0.330432	-3.04393	0.242326	-1.27396	-0.609901	0.182725	0.934923	0.43051	-0.675129	0.233339	0.141223	0.568983	-0.757792	0.365045	-0.201961	0.492846	0.0930093	1.0194	-0.0291862	0.119355	-0.571551	0.778505	1.07992	-1.59094	-0.188849	0.424395	-0.555169	-0.514134	-0.434041	-0.549683	-1.11314	-0.809285	0.344107	-0.862927	1.01957	-0.0470348	0.839752
TCGA-TN-A7HI	B2b	high	Yes	Yes	Negative	-2.28743	-1.37261	-0.923421	-1.10644	-2.0845	-1.93201	-1.89877	-2.07383	-1.81785	-2.45238	-1.2718	-1.44254	-3.34224	-0.63238	-1.06565	-1.40368	-1.86085	-1.34179	-2.47784	-2.80139	-1.95009	-1.22971	-0.551166	-0.954272	-0.502532	-1.0936	-0.67019	-1.16949	-1.17708	-0.423062	-1.7444	-1.58801	-1.91123	-2.16644	-2.85155	-1.77941	-2.08267	-1.85413	0.234119	-0.570722	-1.81128	-0.192471	-1.54262	-1.67805
TCGA-TN-A7HJ	B1b	low	No	No	Negative	0.710948	0.614343	1.58362	0.7846	0.510267	0.71755	0.656202	0.781943	0.535296	0.567267	0.449117	1.12894	0.743646	0.346485	0.431031	1.2378	0.896587	0.832637	1.14952	1.19078	1.41175	0.580662	0.526183	-0.0985933	-1.02509	0.750873	0.383179	-0.33764	1.4288	-0.621054	0.806234	0.6856	1.00048	0.612059	-0.128761	0.467758	1.06044	0.0136682	-0.249952	0.639983	0.604358	0.0708771	0.942046	0.486192
TCGA-TN-A7HL	B2a	moderate	Yes	Yes	Positive	-1.48744	-1.38513	-0.117274	-0.708404	-1.05788	-0.150728	0.117694	-1.08612	-0.913032	-1.06607	-1.68958	0.701417	0.530751	-1.13847	0.522134	0.766776	-0.630486	-1.77219	-0.138476	0.702417	-0.781671	-0.182209	-0.0135807	0.679813	0.770217	-1.43768	-0.67019	-1.26508	-0.852587	0.478246	-0.469221	0.632007	0.606493	-1.17951	-0.64	1.49655	-1.03955	-0.424445	-0.551312	1.58708	-0.455501	-1.11105	0.657947	-0.849957
TCGA-UF-A718	B1b	high	Yes	No	Negative	0.352516	1.21933	-0.694303	0.0813896	0.416394	0.474151	0.678225	0.475746	0.814495	0.21613	0.231928	0.689992	1.1024	0.135702	0.392016	0.795006	0.534043	0.390465	0.652266	0.801673	0.294404	0.799758	0.696068	0.589022	-0.0612691	0.304629	-0.67019	0.594575	-0.893908	-0.644881	1.13754	0.843098	1.14734	1.17358	-0.0185528	0.452731	0.898886	0.317194	-0.455162	-0.961758	0.285193	-0.0497481	0.73839	-0.299684
TCGA-UF-A719	B1a	moderate	Yes	Yes	Negative	-0.228586	-0.774076	-0.495717	0.616327	-0.66749	0.236179	0.103063	-0.787857	-1.38398	0.39541	-1.07735	0.875361	-0.482646	-0.33859	-0.335018	0.900698	-0.652804	0.488922	0.739321	-0.540923	-0.0192196	-0.571381	0.18782	-0.514808	-0.0378992	0.33948	-0.67019	-1.42919	0.950343	0.706943	-0.447	0.760374	-0.52267	0.668234	0.0158475	0.244791	0.634498	-0.252077	-0.682539	2.18372	1.06227	-0.161185	-2.06526	-0.412532
TCGA-UF-A71A	B2b	moderate	Yes	No	Negative	-0.502846	-1.26935	-0.793367	-2.19304	-0.494221	0.110287	-1.54798	-0.506979	-0.213195	-0.615248	-0.0862106	-0.680773	-1.63779	-0.894807	-1.54374	-0.526374	-0.185654	-0.612401	-0.871728	-1.20589	-0.11695	-0.338798	0.358315	-0.715674	-1.53149	-0.97454	-0.67019	-0.481311	-1.17708	-2.2491	-0.766002	-1.056	-0.818106	-0.817015	-1.10362	0.881197	-0.784462	-0.274038	-1.54311	-1.98738	-0.130097	-1.17248	-1.29488	-1.13053
TCGA-UF-A71B	B1b	moderate	Yes	Yes	Negative	0.301858	-0.126672	-0.911444	-1.27666	-0.356565	0.0173752	0.232622	-0.474017	-0.411141	0.126188	0.491632	0.130862	-0.16179	0.339572	-0.0389924	0.191122	-0.377468	0.208096	-0.225291	-0.101162	-0.925986	-0.175689	-0.260656	-0.10289	-0.68088	0.164262	-0.67019	-0.6397	-0.822307	-0.131453	-0.0878553	0.205402	0.295018	0.109629	0.458552	-0.221348	-0.0885206	0.0242818	0.0933888	0.0532727	0.0532267	0.115374	-0.461214	-0.135479
TCGA-UF-A71D	B1a	high	Yes	Yes	Negative	-0.384826	-1.29363	0.466644	-0.36488	-0.237031	-1.00231	0.0199919	-0.263456	-1.3864	0.292804	-0.446078	0.613139	0.372099	-0.229939	-1.0309	0.627298	-0.0560494	-1.09141	0.692603	0.420269	0.933453	-0.191976	0.166416	-0.37712	-1.06637	0.252189	-0.67019	-0.00552654	1.23507	-1.11551	-0.514149	0.534237	0.0945694	0.146218	-0.627779	-0.256034	1.13222	-2.20282	-0.453361	1.46651	0.409173	-1.65336	-2.11759	-2.09007
TCGA-UF-A71E	B2b	moderate	No	Yes	Negative	0.0137058	-0.208788	0.169616	-1.19202	0.304674	0.59821	-0.0941405	-0.271226	-0.718646	1.58554	0.475231	0.649631	0.116134	-0.821298	0.360355	0.912063	0.15349	-1.81368	0.115957	-0.0312599	0.543894	-0.000671785	0.480487	0.164843	-0.806888	0.494375	-0.67019	-1.28184	-1.17708	-0.413324	-0.355522	0.322678	0.640381	-0.597332	0.612758	1.0733	-0.291292	0.443658	-0.555061	0.757607	0.52167	-1.37869	-1.01918	-1.55203
TCGA-UF-A7J9	B2b	high	Yes	Yes	Negative	-0.648283	-1.12014	-0.462415	-3.12245	-0.420546	-1.31052	-1.28354	-0.506545	-1.26894	0.429926	0.178828	-2.13886	-1.8323	-2.13659	-1.47214	-1.92258	-0.0997137	-2.09424	-0.746282	-1.00109	-0.576128	-0.659938	-0.698326	-0.392767	-0.700215	-0.746724	-0.67019	-1.42919	-1.17708	-0.983454	-1.77361	-2.681	-1.06995	-0.736309	-0.404515	-0.66897	-2.38643	0.271953	-0.414374	-0.857369	-0.848768	-0.68535	-0.371078	-1.87912
TCGA-UF-A7JA	B2b	high	Yes	Yes	Negative	-0.362159	-0.447284	1.30956	-0.111128	-0.750554	-0.245218	0.0966379	-0.398559	0.572974	-1.4042	0.270063	-0.566336	-0.234724	-1.04856	-0.832569	-0.643799	-0.248908	0.662956	-0.319773	0.0132635	-0.526852	-0.318239	-1.25915	-0.119267	-0.853671	-0.00304182	-0.67019	1.16856	-0.0225096	-0.920054	0.335336	1.19592	0.505504	-0.390917	0.164023	-0.349444	0.296437	0.132088	0.916656	-0.623049	-0.584375	0.230602	0.175223	0.911283
TCGA-UF-A7JC	A	low	Yes	No	Negative	0.901133	0.653234	1.24122	0.437214	1.39556	0.766804	1.02189	1.45303	1.54629	1.602	0.90986	0.604322	0.846803	1.11103	1.28611	0.85579	1.11045	1.32823	1.36407	1.22423	0.874148	1.22342	1.11125	1.36487	0.0651385	1.09119	0.0564291	0.62714	2.47709	0.525862	1.26585	0.223037	0.836141	0.619643	1.69217	0.997695	1.21394	1.02323	0.198987	0.946392	1.40029	1.11136	0.753817	1.58995
TCGA-UF-A7JD	B2b	moderate	Yes	Yes	Negative	-1.83458	-0.0110849	-0.0231872	-1.89199	-1.3523	-0.556764	-0.934794	-1.81716	-0.0563946	-2.12501	-2.46584	-1.75455	-0.947787	-1.17608	-2.47814	-1.54777	-2.38097	-0.103887	0.0865051	-0.728687	-1.24881	-1.59065	-1.63618	-1.12605	-0.748275	-1.81933	-0.223317	0.561658	0.819125	0.102885	-0.13822	-1.02471	-1.55994	-0.709728	-1.92487	-1.99715	0.0569001	-0.834209	0.955018	-1.3851	-0.934427	-0.82691	-0.862226	-0.416996
TCGA-UF-A7JF	B1a	high	Yes	Yes	Negative	0.0311037	-0.278454	0.81372	-0.727892	-1.23843	-0.210481	0.320248	-1.04698	0.113138	-1.73394	0.0246429	0.842629	-0.355195	0.443232	1.14185	0.968298	-0.483011	-0.102933	-0.334894	0.595457	1.08295	0.327867	0.173976	-0.100148	-1.84595	-1.58153	-0.253003	-0.693714	0.638462	-1.2675	1.03358	1.18673	0.835308	-0.204243	-1.10489	0.191326	0.180932	-0.495043	-0.822999	0.123615	-0.685367	-0.887025	0.0533244	0.180528
TCGA-UF-A7JH	B1a	moderate	Yes	Yes		-0.00247422	0.644312	1.34949	-0.275062	0.822068	0.528997	0.72041	0.72433	0.515703	0.05506	0.726308	0.0792612	0.352111	0.683168	0.458197	0.211245	0.749642	0.1811	0.285665	0.231241	0.303718	0.82595	0.623675	1.16009	0.619834	-1.42297	-0.67019	0.761508	1.66825	0.54756	-0.00255375	0.628316	1.21416	-0.368632	0.767186	0.808793	0.385166	0.422525	-0.116644	-0.744139	0.677328	-0.722118	0.210137	0.708183
TCGA-UF-A7JJ	B1b	high	Yes	No	Negative	-0.16694	0.0471445	0.616421	0.11135	0.349197	0.47771	0.163789	0.312545	0.899578	-0.068618	-0.0216939	0.69557	0.862223	-0.0279898	-0.344217	0.635013	0.344213	0.719489	-0.0050838	1.16613	0.317897	0.606285	1.14019	1.17909	0.837708	-0.320468	0.424762	1.53669	1.48509	0.13201	0.558091	0.849456	0.714148	0.801606	0.290776	1.42325	0.448899	0.926434	0.737586	0.688274	0.585887	0.941095	-0.00140047	0.965893
TCGA-UF-A7JK	A	low	Yes	Yes	Negative	0.62125	0.0514254	1.46411	-0.0111812	0.158271	0.567204	0.731738	0.597744	1.16151	0.302192	0.808391	-0.463521	0.094675	-0.076273	0.406936	-0.012104	0.488519	0.834491	1.61243	0.327563	0.943896	0.76	0.312025	-0.713223	-1.38713	0.0509596	-0.309564	0.660214	1.67148	-0.60392	0.271864	-0.511354	0.507847	-0.434059	0.4249	0.796996	1.73531	0.128545	-0.043822	-1.31422	0.640025	1.53182	0.371184	1.75316
TCGA-UF-A7JO	A	moderate	No	No	Negative	0.0964009	0.116483	0.537914	-0.757357	-0.354494	-0.262971	0.138018	-0.214074	-0.469435	-0.569711	0.554162	-0.607567	-0.575991	0.454981	-0.449254	-0.377728	0.287236	0.269166	-0.967253	-0.897192	0.328411	0.00438241	0.537324	-1.5316	1.04575	-0.605097	-0.67019	-1.29518	-0.618687	1.467	-0.918609	0.548371	0.145627	-0.289549	-0.475501	0.294905	-0.835875	0.0794829	-0.556159	0.609696	0.0200108	0.755941	-1.63085	0.268442
TCGA-UF-A7JS	A	moderate	Yes	Yes	Negative	-1.38088	-0.781068	0.0763346	0.506741	-0.56415	0.782839	1.1744	-1.58744	-0.79596	-1.46963	-0.804439	1.12492	1.59151	2.09995	2.8248	0.959371	-0.183391	-1.35294	-1.38436	0.850905	-0.184863	0.689057	-0.0631381	-0.0548262	-0.535299	2.00538	-0.67019	-1.42919	-1.17708	0.242135	0.923751	0.755454	-0.0941102	-0.835063	-2.08555	-0.0601017	1.30968	0.0721834	2.29387	0.576178	-2.61727	-0.947926	0.89315	-0.2839
TCGA-UF-A7JT	A	low	No	No	Negative	0.810326	0.535828	1.53279	0.0801144	0.502726	0.195285	0.260644	0.302622	0.299212	0.431212	0.938711	0.104417	0.599421	0.62047	0.68481	0.202036	0.127635	-2.27518	0.250557	0.791825	0.132728	0.416602	0.936154	0.450192	1.84055	-0.373175	4.35787	-0.179259	-0.685992	1.86104	0.251049	0.462575	0.884397	0.502951	-0.180887	0.32887	-0.496334	-0.666844	-0.158477	1.00637	0.39801	1.48764	-0.599248	0.0767632
TCGA-UF-A7JV	A	low	No	No	Negative	0.492096	0.667915	1.5075	-0.184154	0.0366434	0.540219	-0.18211	-0.122853	0.0283769	0.0252907	-0.133123	-0.151003	0.540355	1.06199	-0.130213	-0.0155756	-0.219614	0.837011	0.672328	1.05573	-0.127493	-0.409281	-0.778273	-0.682215	0.215646	0.290001	-0.40478	1.13466	0.996096	0.725388	-0.795765	-0.356023	0.0586344	1.08789	0.473471	-0.689508	-0.794878	-0.599385	0.343843	-0.138636	0.236617	1.16856	0.256293	-0.512304
TCGA-UP-A6WW	B2a	moderate	No	Yes	Positive	-2.45807	-0.449981	0.13641	-0.788494	-0.86496	-0.873318	-1.76308	-1.12526	-2.27898	-1.56837	-2.99691	0.370519	-2.12507	-0.274178	-0.296002	0.328292	-0.894442	-0.0091112	-1.1898	-1.48638	-0.288105	-0.503602	-1.9813	-0.627734	-1.03178	-0.827942	-0.0862912	-0.748091	-0.760611	-0.192175	-0.78102	0.35988	-1.16638	-0.5468	-1.04074	-0.782802	-2.58964	-0.766301	-1.97586	1.07472	-2.02775	-1.59955	-0.189711	0.337753
TCGA-WA-A7GZ	B1b	moderate	Yes		Negative	0.848057	-0.176004	1.0409	0.255795	-0.256417	0.239191	0.449837	-0.152793	0.634754	0.915831	0.565803	-0.167563	0.199231	0.0350952	-0.824095	-0.294537	0.0984653	0.36315	-0.0713913	-0.432263	0.00240633	-0.0896153	-0.714734	-0.548625	-0.623984	-0.678734	0.148489	1.59422	-0.170283	0.619274	0.611531	0.155063	0.155774	0.60732	0.512027	0.714105	-0.385762	0.395752	-1.89386	-0.275153	0.584112	0.924645	0.10202	1.05528
TCGA-WA-A7H4	B1b	moderate	Yes		Negative	-0.33262	0.348403	0.160494	0.330251	-0.277037	0.316845	0.180514	-0.268841	0.349543	-0.30494	0.0760435	-0.379025	-0.63605	0.169582	-0.609965	-0.114357	-0.545554	0.200185	0.488132	-0.54027	-0.35282	-0.330062	0.586377	-0.622512	-0.495365	-0.155805	-0.190086	-0.0768466	-0.423933	-0.480342	-0.344988	-0.463315	0.0525455	1.06355	0.210879	-0.63563	-0.0908719	0.0645312	0.483695	-0.814839	-0.253348	0.163219	-0.247337	0.482687
[truncated: 453 more columns]

## Sheet: Source Data Fig. 1D-E
Source data Fig. 1 D-E: UCHL1 FPKM transcript level and GSVA scores for positive and negative UCHL1-related gene set
Sample ID	UCHL1 [FPKM]	Positive gene set [GSVA]	Negative gene set [GSVA]	Cluster
TCGA-4P-AA8J-01	14.3143	0.201366	-0.346997	B1b
TCGA-BA-4074-01	9.9752	0.128455	-0.410262	B1a
TCGA-BA-4076-01	2.86829	-0.124387	0.407783	A
TCGA-BA-4078-01	3.83736	0.470527	-0.702445	B2b
TCGA-BA-5149-01		-0.432986	0.400866	A
TCGA-BA-5151-01	0.237335	-0.451323	0.715277	A
TCGA-BA-5152-01	16.7262	-0.217759	0.314031	A
TCGA-BA-5153-01	41.6499	0.333533	-0.586996	B2a
TCGA-BA-5555-01	2.32544	0.387019	-0.422522	B1a
TCGA-BA-5556-01	0.203068	-0.490613	0.695931	A
TCGA-BA-5557-01	1.21001	-0.179587	0.678444	A
TCGA-BA-5558-01	0.299229	-0.466576	0.673733	A
TCGA-BA-5559-01	8.55774	0.300911	-0.713217	B2a
TCGA-BA-6868-01	2.98856	0.267911	-0.0355404	B1b
TCGA-BA-6869-01	21.2984	0.392199	-0.398631	B1a
TCGA-BA-6870-01	0.84177	-0.284105	0.49476	A
TCGA-BA-6871-01	1.94326	0.397558	-0.71167	B2a
TCGA-BA-6872-01	29.6605	-0.101733	0.564032	A
TCGA-BA-6873-01	1.91338	-0.398558	0.157502	A
TCGA-BA-7269-01	4.77114	0.394637	0.00458692	B1b
TCGA-BA-A4IF-01	68.4469	0.447997	-0.364709	B1a
TCGA-BA-A4IG-01	29.423	0.289937	-0.216353	B2a
TCGA-BA-A4IH-01	100.144	0.580389	-0.462079	B2b
TCGA-BA-A4II-01	7.50702	-0.141538	0.366944	A
TCGA-BA-A6D8-01	14.5432	0.400248	-0.474824	B2b
TCGA-BA-A6DA-01	1.77937	0.0513547	0.636984	A
TCGA-BA-A6DB-01	5.28527	-0.10364	0.497273	B1b
TCGA-BA-A6DD-01	3.03191	-0.258628	0.529528	A
TCGA-BA-A6DE-01	10.4708	0.078628	-0.0260072	B1a
TCGA-BA-A6DG-01	3.4602	-0.0466947	0.296458	B1b
TCGA-BA-A6DI-01	4.63845	0.0598808	0.508916	B1b
TCGA-BA-A6DJ-01	0.257001	-0.506265	0.687219	A
TCGA-BA-A6DL-01	47.8452	0.241069	0.00435125	B1a
TCGA-BA-A8YP-01	7.01915	0.429392	-0.703172	B2b
TCGA-BB-4217-01	1.59361	-0.209494	-0.479865	B1b
TCGA-BB-4223-01	4.53737	0.25988	-0.703067	B2a
TCGA-BB-4224-01	0.820026	-0.307655	0.0112281	A
TCGA-BB-4225-01	10.6125	0.431778	-0.616855	B2a
TCGA-BB-4227-01	2.10127	-0.124065	-0.0106755	A
TCGA-BB-4228-01	4.20866	0.323989	-0.618804	B2a
TCGA-BB-7861-01		0.131997	-0.617317	B2a
TCGA-BB-7862-01		0.435825	-0.519226	B2b
TCGA-BB-7863-01		-0.430473	0.730309	A
TCGA-BB-7864-01		0.343881	-0.34848	B1a
TCGA-BB-7866-01		0.0308603	-0.580928	B2a
TCGA-BB-7870-01		0.27193	-0.346691	B1a
TCGA-BB-7871-01		0.467147	-0.68558	B2b
TCGA-BB-7872-01		-0.222608	0.352774	A
TCGA-BB-8596-01	69.377	0.289431	-0.517839	B1b
TCGA-BB-8601-01	201.107	0.46196	-0.308045	B2b
TCGA-BB-A5HU-01	2.96518	-0.2865	0.247466	A
TCGA-BB-A5HY-01	1.53935	0.112507	-0.478872	B1b
TCGA-BB-A5HZ-01	41.4991	-0.0958893	0.422639	B1a
TCGA-BB-A6UM-01	6.40133	-0.0577363	-0.317461	B2a
TCGA-BB-A6UO-01	2.46793	-0.418453	0.604737	A
TCGA-C9-A47Z-01	1.17006	-0.445144	0.730597	A
TCGA-C9-A480-01	0.841326	-0.461998	0.709084	A
TCGA-CN-4722-01	0.653876	-0.228399	0.633684	A
TCGA-CN-4723-01	2.00745	0.245527	-0.475264	B1b
TCGA-CN-4725-01	6.81993	-0.314095	0.517882	B1b
TCGA-CN-4726-01	2.09925	-0.206837	0.680071	A
TCGA-CN-4727-01	143.139	0.11021	-0.470104	B1a
TCGA-CN-4728-01	4.91055	0.401004	-0.592281	B1b
TCGA-CN-4729-01	0.899624	-0.0959045	0.442962	B1b
TCGA-CN-4730-01	63.2872	0.178256	-0.100936	B1a
TCGA-CN-4731-01	15.1019	0.266088	-0.222538	B1a
TCGA-CN-4733-01	4.19223	-0.0775385	-0.0938708	B1b
TCGA-CN-4734-01	0.759505	-0.484336	0.712086	A
TCGA-CN-4735-01	26.2828	0.534896	-0.6837	B2b
TCGA-CN-4736-01	6.21336	-0.200265	0.221921	B1b
TCGA-CN-4737-01	4.45946	-0.119752	0.23967	B1b
TCGA-CN-4738-01	0.679648	-0.0936182	0.252109	B1b
TCGA-CN-4739-01	0.672465	-0.0679826	-0.402783	B1a
TCGA-CN-4740-01	8.85017	0.156648	-0.0215898	B1b
TCGA-CN-4741-01	8.0742	0.348374	-0.0474811	B2a
TCGA-CN-4742-01	2.12797	-0.164676	0.660705	B1b
TCGA-CN-5355-01	2.97782	-0.254067	0.27987	B1b
TCGA-CN-5356-01	6.80622	0.0464378	-0.262251	B1a
TCGA-CN-5358-01	4.06844	-0.00221378	0.27667	B1b
TCGA-CN-5359-01	127.24	0.159854	-0.1749	B1b
TCGA-CN-5360-01	55.1091	0.500177	-0.499614	B2b
TCGA-CN-5361-01	7.3911	0.075289	-0.375543	B1b
TCGA-CN-5363-01	1.80494	-0.346655	-0.269775	A
TCGA-CN-5364-01	2.76502	-0.186331	-0.268185	A
TCGA-CN-5365-01	0.485089	-0.467873	0.601985	A
TCGA-CN-5366-01	1.6643	-0.45905	0.216814	B1b
TCGA-CN-5367-01	7.4133	-0.232211	-0.240755	B1b
TCGA-CN-5369-01	1.04059	-0.469795	0.597372	B1b
TCGA-CN-5370-01	24.0304	-0.146725	0.21656	B1b
TCGA-CN-5373-01	1.25711	-0.214847	0.710925	B1b
TCGA-CN-5374-01	0.72262	0.127064	-0.46495	B2a
TCGA-CN-6010-01	6.03967	0.516417	-0.730366	B2b
TCGA-CN-6011-01	4.46792	-0.236511	0.48706	A
TCGA-CN-6012-01	3.39252	0.485446	-0.58391	B2b
TCGA-CN-6013-01	1.86377	-0.278713	0.225824	A
TCGA-CN-6016-01	10.4683	0.29698	-0.0465593	B1b
TCGA-CN-6017-01	12.163	0.196377	-0.268186	B1b
TCGA-CN-6018-01	3.43157	-0.156815	-0.197057	B1b
TCGA-CN-6019-01	37.1048	0.492308	-0.471366	B2b
TCGA-CN-6020-01	1.35908	-0.175637	0.518065	A
TCGA-CN-6021-01	18.899	0.415921	-0.283328	B2b
TCGA-CN-6022-01	131.125	0.338989	-0.532714	B1b
TCGA-CN-6023-01	206.176	0.456457	-0.728381	B2b
TCGA-CN-6024-01	25.3478	0.495509	-0.314617	B2b
TCGA-CN-6988-01	15.1534	0.0681524	-0.290623	B1a
TCGA-CN-6989-01	12.6243	0.439537	-0.670455	B2b
TCGA-CN-6992-01	41.2935	0.52218	-0.67235	B2b
TCGA-CN-6994-01	23.6032	0.24728	0.0459149	B1b
TCGA-CN-6995-01	0.841936	-0.378836	0.242636	A
TCGA-CN-6996-01	3.73743	-0.360565	0.405198	B1b
TCGA-CN-6997-01	149.318	0.387899	-0.673437	B2b
TCGA-CN-6998-01	0.809502	-0.383993	0.765447	A
TCGA-CN-A497-01	32.1841	0.396354	-0.666584	B1a
TCGA-CN-A498-01	10.1036	-0.0214658	0.436556	B1b
TCGA-CN-A499-01	55.0784	-0.107815	-0.0757119	A
TCGA-CN-A49A-01	1.20372	0.408864	-0.456655	B2b
TCGA-CN-A49B-01	0.882186	-0.121744	-0.0889545	A
TCGA-CN-A49C-01	26.2292	0.220466	-0.238207	B2a
TCGA-CN-A63T-01	58.2666	0.331454	-0.221993	B1a
TCGA-CN-A63U-01	12.0146	0.346854	-0.578759	B1a
TCGA-CN-A63V-01	2.48527	-0.163816	0.0994685	B1b
TCGA-CN-A63W-01	77.3188	0.302798	0.0720699	B1a
TCGA-CN-A641-01	27.9374	0.202838	0.146718	B1a
TCGA-CN-A642-01	1.93315	-0.500637	-0.240591	A
TCGA-CN-A6UY-01	40.0842	0.271537	-0.524049	B2a
TCGA-CN-A6V1-01		0.0787203	-0.41518	B2a
TCGA-CN-A6V3-01	11.8143	-0.154936	0.380104	B1a
TCGA-CN-A6V6-01	9.97399	0.213516	-0.446896	B2a
TCGA-CN-A6V7-01	7.10424	0.368618	-0.552553	B2a
TCGA-CQ-5323-01	8.70487	0.347557	0.363409	B2a
TCGA-CQ-5324-01	1.00198	-0.00484746	0.278697	A
TCGA-CQ-5325-01	2.67813	-0.229002	0.610387	B1b
TCGA-CQ-5326-01	1.59433	-0.179287	0.533863	A
TCGA-CQ-5327-01	0.901159	-0.569208	0.645509	A
TCGA-CQ-5329-01	3.04589	-0.249434	0.124081	B1b
TCGA-CQ-5330-01	6.59851	-0.294596	-0.147925	B1b
TCGA-CQ-5331-01	0.225434	-0.5637	0.661489	A
TCGA-CQ-5332-01	3.04735	0.496445	-0.390846	B2b
TCGA-CQ-5333-01	3.41112	-0.257327	-0.183672	A
TCGA-CQ-5334-01	2.41858	-0.424643	0.445284	A
TCGA-CQ-6218-01	2.64965	-0.248556	0.76169	B1b
TCGA-CQ-6219-01	3.53199	-0.320482	0.0510752	B1b
TCGA-CQ-6220-01	0.270116	-0.395252	0.723093	A
TCGA-CQ-6222-01	3.03148	-0.0130466	0.575002	B1b
TCGA-CQ-6223-01	5.78523	-0.304302	0.659496	A
TCGA-CQ-6224-01	8.12889	0.077183	-0.45107	B1b
TCGA-CQ-6225-01	0.393066	0.353221	-0.341691	B1a
TCGA-CQ-6227-01	22.3798	-0.0383825	0.366009	B1b
TCGA-CQ-6228-01	112.292	0.44125	-0.553638	B2b
TCGA-CQ-6229-01	2.87425	-0.434738	0.73271	B1b
TCGA-CQ-7063-01	0.102679	-0.543129	0.772912	A
TCGA-CQ-7065-01	1.22977	-0.246915	0.525295	A
TCGA-CQ-7067-01		-0.207663	0.131947	B1b
TCGA-CQ-7068-01	0.107663	-0.540646	0.320219	A
TCGA-CQ-7069-01	0.695168	-0.277542	0.573206	A
TCGA-CQ-7071-01	0.677609	-0.409141	0.765861	A
TCGA-CQ-7072-01	64.2537	0.457887	-0.658098	B2b
TCGA-CQ-A4C6-01	1.4485	-0.481474	0.619301	A
TCGA-CQ-A4C9-01	0.922521	0.282469	-0.354363	B1a
TCGA-CQ-A4CA-01	8.80735	-0.0286017	-0.0755819	B1b
TCGA-CQ-A4CB-01	3.00241	-0.322517	-0.259676	B1b
TCGA-CQ-A4CD-01	0.877046	-0.31415	0.259008	A
TCGA-CQ-A4CE-01	0.378311	-0.461992	0.689575	A
TCGA-CQ-A4CG-01	3.43231	0.00742319	-0.323917	A
TCGA-CQ-A4CH-01	1.42648	-0.377853	0.419278	A
TCGA-CQ-A4CI-01	0.692442	0.434655	-0.620291	B2b
TCGA-CR-5243-01	16.8526	0.312315	-0.63421	B2a
TCGA-CR-5247-01	1.82507	0.336829	-0.173006	B1a
TCGA-CR-5248-01	0.359513	-0.144229	-0.544915	B2a
TCGA-CR-5249-01	6.4556	0.35031	-0.453621	B2a
TCGA-CR-5250-01	7.05702	0.374333	-0.601695	B2a
TCGA-CR-6467-01	5.79793	0.285155	-0.680033	B2a
TCGA-CR-6470-01	23.936	0.389619	-0.670324	B2a
TCGA-CR-6471-01	0.812257	-0.257917	0.549119	A
TCGA-CR-6472-01	1.82963	0.309494	-0.565055	B2a
TCGA-CR-6473-01	7.96028	0.256915	-0.520634	B2a
TCGA-CR-6474-01	3.72243	0.145386	-0.246179	B1b
TCGA-CR-6477-01	5.89283	-0.0812953	0.354357	B1b
TCGA-CR-6478-01	3.25882	0.0242951	-0.303062	B1b
TCGA-CR-6480-01	4.83545	0.249263	-0.368687	B2a
TCGA-CR-6481-01	1.6164	0.0741185	-0.494119	B1b
TCGA-CR-6482-01	76.7055	0.416052	-0.658727	B2a
TCGA-CR-6484-01	1.51509	-0.331476	0.315885	A
TCGA-CR-6487-01	9.04703	0.137907	-0.726464	B2a
TCGA-CR-6488-01	3.42871	-0.145307	0.377446	B1b
TCGA-CR-6491-01	0.282383	-0.345594	0.663242	A
TCGA-CR-6492-01	0.650792	-0.331723	0.638649	B1b
TCGA-CR-6493-01	0.301741	-0.404411	0.532261	A
TCGA-CR-7364-01	5.08299	0.353002	-0.24908	B1a
TCGA-CR-7365-01	1.26871	-0.152569	0.646095	B1b
TCGA-CR-7367-01	3.96774	0.0659763	0.45908	B1b
TCGA-CR-7368-01	2.3101	0.0322682	-0.0420037	B2a
TCGA-CR-7369-01	6.88076	0.0379771	-0.0174291	B2a
TCGA-CR-7370-01	1.44762	0.534421	-0.665468	B2b
TCGA-CR-7371-01	1.98955	0.550993	-0.480866	B2b
TCGA-CR-7372-01	0.881086	-0.0325948	0.536189	B1b
TCGA-CR-7373-01	0.14887	-0.466757	0.378299	A
TCGA-CR-7374-01	6.2027	0.519528	-0.702864	B2b
TCGA-CR-7376-01	2.29511	0.0822996	-0.151099	B1b
TCGA-CR-7377-01	4.98956	-0.0192522	-0.000262803	B1b
TCGA-CR-7379-01	1.75838	-0.0282177	0.310385	B1b
TCGA-CR-7380-01	1.3882	-0.29195	0.517977	A
TCGA-CR-7382-01	2.13029	-0.143463	-0.430452	A
TCGA-CR-7383-01	5.33155	0.00615278	-0.428637	B1b
TCGA-CR-7385-01	1.05773	0.154467	-0.390298	B2a
TCGA-CR-7386-01	3.92977	-0.0288307	0.400237	B1b
TCGA-CR-7388-01	25.3408	0.440804	-0.518143	B2b
TCGA-CR-7389-01	15.1144	0.264424	0.1212	B1b
TCGA-CR-7390-01	3.36902	0.250879	0.171011	B1b
TCGA-CR-7391-01	1.52403	-0.0227713	0.497345	B1b
TCGA-CR-7392-01	5.60544	-0.153048	0.335853	B1b
TCGA-CR-7393-01	0.708564	0.23611	0.349885	B1b
TCGA-CR-7394-01	0.660121	-0.267885	0.607446	A
TCGA-CR-7395-01	0.912371	-0.473317	0.663189	A
TCGA-CR-7397-01	6.62194	0.309571	0.264764	B1b
TCGA-CR-7398-01	1.50668	0.447832	-0.618076	B2b
TCGA-CR-7399-01	131.65	0.461704	-0.678161	B2a
TCGA-CR-7401-01	6.73451	-0.134914	0.56533	B1b
TCGA-CR-7402-01	6.67185	0.426434	-0.542649	B1a
TCGA-CR-7404-01	2.91379	0.0880994	-0.548593	B2a
TCGA-CV-5430-01	4.52534	0.417209	-0.578821	B1b
TCGA-CV-5431-01	2.44373	0.193804	-0.630957	B2a
TCGA-CV-5432-01	83.2218	0.400823	-0.116406	B1b
TCGA-CV-5434-01	2.67138	0.460988	-0.666025	B2b
TCGA-CV-5435-01	5.10317	0.501114	-0.566256	B2b
TCGA-CV-5436-01	56.671	-0.0574764	-0.099525	B1b
TCGA-CV-5439-01	0.122819	-0.343397	0.665339	A
TCGA-CV-5440-01	22.5913	0.397522	-0.344545	B1b
TCGA-CV-5441-01	102.654	0.06029	-0.0470739	B1a
TCGA-CV-5442-01	0.161633	-0.26208	0.514695	A
TCGA-CV-5443-01	0.957095	0.205082	-0.685969	B2a
TCGA-CV-5444-01	3.67592	0.0353856	-0.254356	B1b
TCGA-CV-5966-01	2.30016	-0.3423	-0.142511	A
TCGA-CV-5970-01	1.87126	-0.177171	0.686701	B1b
TCGA-CV-5971-01	16.2002	0.252204	-0.577864	B1b
TCGA-CV-5973-01	0.280716	-0.220813	0.621192	A
TCGA-CV-5976-01	2.47601	-0.440222	0.25512	A
TCGA-CV-5977-01	0.692319	-0.445564	0.529326	A
TCGA-CV-5978-01	86.6992	0.502601	-0.663074	B2b
TCGA-CV-5979-01	2.63218	-0.326142	0.411887	A
TCGA-CV-6003-01	5.45303	-0.205088	0.246846	A
TCGA-CV-6433-01	3.49247	0.316389	-0.625487	B2a
TCGA-CV-6436-01	0.199347	-0.329152	0.660336	A
TCGA-CV-6441-01	2.06575	0.213671	-0.53062	B1a
TCGA-CV-6933-01	51.5049	0.321178	-0.261498	B1b
TCGA-CV-6934-01	6.88141	0.288369	-0.451083	B1b
TCGA-CV-6935-01	6.37516	0.416823	-0.465704	B2b
TCGA-CV-6936-01	0.614414	-0.23681	-0.136445	A
TCGA-CV-6937-01	15.6256	0.414173	-0.379892	B2b
TCGA-CV-6938-01	0.283971	-0.50247	0.597227	A
TCGA-CV-6939-01	3.52044	0.34393	-0.670121	B2a
TCGA-CV-6940-01	3.44331	0.304963	-0.212625	B1b
TCGA-CV-6941-01	45.5363	0.423108	-0.500592	B1a
TCGA-CV-6942-01	0.796609	-0.434747	-0.349455	B1b
TCGA-CV-6943-01	2.79538	-0.143694	0.459449	B1b
TCGA-CV-6945-01	30.5921	0.178438	0.399475	B1b
TCGA-CV-6948-01	13.7114	0.433464	-0.684096	B2b
TCGA-CV-6950-01	12.947	-0.020294	-0.247916	B1b
TCGA-CV-6951-01	47.0492	0.361335	-0.307111	B1b
TCGA-CV-6952-01	0.880071	-0.51674	0.768245	A
TCGA-CV-6953-01	0.0810227	-0.426742	0.716245	A
TCGA-CV-6954-01	8.92004	0.0125449	0.364289	B1a
TCGA-CV-6955-01	0.987362	-0.191015	0.670486	A
TCGA-CV-6956-01	0.655783	-0.135383	0.319795	A
TCGA-CV-6959-01	0.938175	-0.369687	0.427599	B1b
TCGA-CV-6960-01	176.046	0.382492	-0.271491	B1a
TCGA-CV-6961-01	42.2294	0.473481	-0.216092	B2b
TCGA-CV-6962-01	166.568	0.554987	-0.560595	B2b
TCGA-CV-7089-01	0.728606	-0.480407	0.633853	A
TCGA-CV-7090-01	3.86761	-0.329961	0.38702	A
TCGA-CV-7091-01	6.82775	-0.0733815	0.31149	B1a
TCGA-CV-7095-01	0.601356	-0.285491	0.463817	A
TCGA-CV-7097-01	4.02086	-0.231842	0.216964	B1b
TCGA-CV-7099-01	1.13897	-0.452356	0.595365	A
TCGA-CV-7100-01	81.5248	0.0329289	-0.559002	B2a
TCGA-CV-7101-01	3.82089	0.437976	-0.39651	B2b
TCGA-CV-7102-01	7.10065	-0.189189	-0.240833	B1b
TCGA-CV-7103-01	19.5145	0.556007	-0.687288	B2b
TCGA-CV-7104-01		-0.13014	0.440422	B1b
TCGA-CV-7177-01	161.812	0.489237	-0.291372	B2b
TCGA-CV-7178-01	3.14683	-0.122843	-0.288163	B1b
TCGA-CV-7180-01	0.21097	-0.423579	0.629651	A
TCGA-CV-7183-01	0.371845	-0.264598	0.766551	A
TCGA-CV-7235-01	8.59199	0.160002	-0.36341	B1b
TCGA-CV-7236-01	3.75746	-0.105709	-0.132681	B1b
TCGA-CV-7238-01	8.39372	-0.224962	0.317767	B1b
TCGA-CV-7242-01	62.5199	0.478002	-0.609707	B2b
TCGA-CV-7243-01		-0.11592	0.363795	B1b
TCGA-CV-7245-01	48.1252	0.340782	0.0101444	B1a
TCGA-CV-7247-01	5.98626	-0.0577661	-0.33063	B1b
TCGA-CV-7248-01	50.0617	0.483378	-0.637801	B2b
TCGA-CV-7250-01	2.49157	0.342091	-0.225423	B1a
TCGA-CV-7252-01	0.868934	-0.469624	0.528287	A
TCGA-CV-7253-01	10.9983	0.193063	-0.279728	B1a
TCGA-CV-7254-01	129.851	0.512269	-0.683914	B2b
TCGA-CV-7255-01	3.20252	-0.334328	0.444985	A
TCGA-CV-7261-01	23.9302	0.487701	-0.590718	B2b
TCGA-CV-7263-01	2.72501	0.189855	-0.518303	B1b
TCGA-CV-7406-01	14.8853	0.513946	-0.603694	B2a
TCGA-CV-7407-01	5.05749	0.33759	-0.376712	B1b
TCGA-CV-7409-01		0.325904	-0.377624	B1a
TCGA-CV-7410-01	1.71302	-0.391564	0.128859	B1b
TCGA-CV-7411-01	0.366534	-0.173057	0.737639	A
TCGA-CV-7413-01	1.51399	-0.314842	0.424565	B1b
TCGA-CV-7414-01	2.52706	0.376478	-0.473214	B1b
TCGA-CV-7415-01	3.36553	0.0191837	0.0759403	B1b
TCGA-CV-7416-01	26.0322	-0.168843	0.0169173	B1b
TCGA-CV-7418-01	101.727	0.566596	-0.716007	B2b
TCGA-CV-7421-01	6.43489	0.428795	-0.550647	B1b
TCGA-CV-7422-01	1.29668	0.275149	-0.537483	B1b
TCGA-CV-7423-01	1.24959	-0.361797	0.658935	A
TCGA-CV-7424-01	92.6925	0.565762	-0.735531	B2b
TCGA-CV-7425-01	0.17312	-0.472669	0.70005	A
TCGA-CV-7427-01	0.143788	-0.480798	0.725988	A
TCGA-CV-7428-01	0.833611	-0.259893	0.416812	B1a
TCGA-CV-7429-01	339.661	0.119529	-0.553368	B1b
TCGA-CV-7430-01	7.96209	0.436564	0.312175	B1b
TCGA-CV-7432-01	31.0235	-0.171545	0.57158	A
TCGA-CV-7433-01	4.59679	-0.0381296	0.361504	B1b
TCGA-CV-7434-01	0.338669	-0.381602	0.52714	A
TCGA-CV-7435-01	14.5152	0.40095	-0.475904	B1b
TCGA-CV-7437-01	149.865	0.40868	-0.55764	B2b
TCGA-CV-7438-01	2.7542	-0.275019	-0.0804811	B1b
TCGA-CV-7440-01	83.5545	0.13211	-0.357574	B1a
TCGA-CV-7446-01	28.2959	0.522522	-0.430364	B2b
TCGA-CV-7568-01	3.13935	-0.0592208	-0.210517	B1b
TCGA-CV-A45O-01	0.154789	-0.310661	0.779792	A
TCGA-CV-A45P-01	0.479799	-0.474124	0.741195	A
TCGA-CV-A45Q-01	0.610252	-0.031435	0.647206	A
TCGA-CV-A45R-01	2.9686	-0.240938	0.505603	B1b
TCGA-CV-A45T-01	1.47953	-0.43437	0.57804	A
TCGA-CV-A45U-01	20.072	0.577995	-0.550159	B2b
TCGA-CV-A45V-01	0.78147	-0.339697	0.585749	A
TCGA-CV-A45W-01	84.0008	0.551023	-0.703053	B2b
TCGA-CV-A45X-01	0.56744	-0.17311	0.607471	A
TCGA-CV-A45Y-01	10.5107	0.186169	-0.165808	B1b
TCGA-CV-A45Z-01	2.70191	0.524247	-0.571247	B2b
TCGA-CV-A460-01	9.02838	0.170249	-0.612948	B2a
TCGA-CV-A461-01	89.5824	0.407177	-0.564094	B1a
TCGA-CV-A463-01	0.307524	-0.415563	0.714024	A
TCGA-CV-A464-01	7.08961	-0.141519	-0.208173	B1b
TCGA-CV-A465-01	23.8486	-0.0587717	0.640151	B1b
TCGA-CV-A468-01	3.29521	-0.207484	0.328339	B1b
TCGA-CV-A6JD-01	1.36505	-0.314907	-0.308696	A
TCGA-CV-A6JE-01	0.733542	-0.115086	0.157904	A
TCGA-CV-A6JM-01	128.128	0.229027	0.282886	A
TCGA-CV-A6JN-01	0.517731	-0.337891	0.63717	A
TCGA-CV-A6JO-01	0.203743	-0.528739	0.675955	A
TCGA-CV-A6JT-01	4.16591	-0.217558	0.565797	A
TCGA-CV-A6JU-01	36.8238	0.273779	-0.408886	B1a
TCGA-CV-A6JY-01	1.11706	-0.101235	0.661937	A
TCGA-CV-A6JZ-01	2.34789	-0.418286	-0.122935	A
TCGA-CV-A6K0-01	4.59689	-0.215129	-0.288515	B1b
TCGA-CV-A6K1-01	0.510677	-0.073005	0.445137	A
TCGA-CV-A6K2-01	0.384598	-0.333947	0.446918	A
TCGA-CX-7085-01	4.16342	0.00181056	0.584574	B1b
TCGA-CX-7086-01	26.4115	-0.0365237	0.435021	A
TCGA-CX-7219-01	1.26074	-0.18854	0.293157	B1b
TCGA-CX-A4AQ-01	6.66784	0.442064	-0.651481	B2b
TCGA-D6-6515-01	1.18902	-0.145296	-0.0414804	B1b
TCGA-D6-6516-01	0.278795	-0.424635	0.653219	A
TCGA-D6-6517-01	0.654157	-0.426351	0.298839	A
TCGA-D6-6823-01	43.2004	0.0746927	-0.355534	B1a
TCGA-D6-6824-01	3.26222	0.302463	-0.472469	B1b
TCGA-D6-6825-01	2.3405	-0.330066	0.511151	B1b
TCGA-D6-6826-01	1.324	-0.203786	0.13588	B1b
TCGA-D6-6827-01	6.71811	0.427971	-0.633593	B2b
TCGA-D6-8568-01	3.64875	-0.0820018	-0.0961421	B1b
TCGA-D6-8569-01	1.22198	-0.427444	0.39831	A
TCGA-D6-A4Z9-01	1.36291	-0.442568	0.45122	A
TCGA-D6-A4ZB-01	20.4903	0.320595	0.256791	B1b
TCGA-D6-A6EK-01	0.174515	-0.289812	0.669619	A
TCGA-D6-A6EM-01	4.83945	-0.130593	-0.0432924	A
TCGA-D6-A6EN-01	0.185114	-0.326015	0.255076	A
TCGA-D6-A6EO-01	136.466	0.405818	-0.482087	B1a
TCGA-D6-A6EP-01	38.8779	0.489907	-0.501084	B2b
TCGA-D6-A6EQ-01	2.4756	-0.127737	0.378413	A
TCGA-D6-A6ES-01	2.59417	0.152532	0.514821	A
TCGA-D6-A74Q-01	0.442692	0.189785	-0.393541	B1a
TCGA-DQ-5624-01	4.20969	-0.0640439	0.476637	B1b
TCGA-DQ-5625-01	2.80912	-0.267093	0.59532	B1b
TCGA-DQ-5629-01	92.5675	0.50041	-0.540169	B2b
TCGA-DQ-5630-01	4.38618	-0.329916	0.494061	B1b
TCGA-DQ-5631-01	116.381	-0.058931	-0.330993	B1b
TCGA-DQ-7588-01	1.81259	-0.154442	0.317889	A
TCGA-DQ-7589-01		0.547743	-0.549407	B2b
TCGA-DQ-7590-01		0.274483	-0.599349	B2a
TCGA-DQ-7591-01	2.41944	0.244195	-0.702293	B2a
TCGA-DQ-7592-01	2.49502	-0.0750438	0.350681	B1b
TCGA-DQ-7593-01		0.0350987	-0.490598	B2a
TCGA-DQ-7594-01		0.304297	-0.493949	B2a
TCGA-DQ-7595-01		0.444737	-0.556517	B1a
TCGA-DQ-7596-01		0.281017	-0.279936	B2a
TCGA-F7-7848-01	17.4605	0.208126	-0.475186	B1a
TCGA-F7-8298-01	1.24623	-0.0811347	-0.296092	B1b
TCGA-F7-8489-01	0.678554	-0.259746	0.36528	A
TCGA-F7-A50G-01	0.446412	-0.420304	0.7187	A
TCGA-F7-A50I-01	2.18753	0.0559849	0.248188	B1b
TCGA-F7-A50J-01	1.1208	-0.3726	0.709704	A
TCGA-F7-A61S-01	0.365201	-0.453315	0.629396	A
TCGA-F7-A61V-01	2.66613	0.0585433	0.115429	B1a
TCGA-F7-A61W-01	28.2227	-0.278061	0.0343202	A
TCGA-F7-A620-01	1.77041	-0.483299	0.568839	A
TCGA-F7-A622-01	0.729662	-0.254326	0.613122	A
TCGA-F7-A623-01	65.2894	0.17406	0.176906	B1b
TCGA-F7-A624-01	0.873237	-0.185644	-0.550112	A
TCGA-H7-7774-01	4.48219	-0.0565193	0.626302	A
TCGA-H7-8501-01	0.912828	-0.454483	0.0685375	A
TCGA-H7-8502-01	1.40497	-0.373197	0.141565	A
TCGA-H7-A6C4-01	4.17878	-0.286803	0.758805	B1b
TCGA-H7-A76A-01	7.6033	0.138582	-0.404233	B2a
TCGA-HD-7229-01	0.326731	-0.442218	0.489913	A
TCGA-HD-7753-01	0.862343	-0.0696399	0.26636	B1b
TCGA-HD-7754-01	0.904504	0.353768	-0.465742	B2a
TCGA-HD-7831-01	3.89602	0.224724	-0.375221	B1b
TCGA-HD-7832-01	1.19944	-0.328782	0.450698	A
TCGA-HD-7917-01		-0.146709	0.371669	B1a
TCGA-HD-8224-01	8.014	0.258757	-0.52176	B1b
TCGA-HD-8314-01	3.47333	0.43118	-0.536932	B2a
TCGA-HD-8634-01	0.547447	-0.453282	0.814802	A
TCGA-HD-8635-01	3.61645	-0.094685	0.230945	B1b
TCGA-HD-A4C1-01	0.666905	-0.476465	0.678933	A
TCGA-HD-A633-01	1.20124	-0.404604	0.41924	A
TCGA-HD-A634-01	80.5178	0.451451	-0.577013	B2b
TCGA-HD-A6HZ-01	2.87325	0.136878	-0.188437	B1b
TCGA-HD-A6I0-01	0.599393	-0.299337	0.605956	A
TCGA-HL-7533-01	6.94763	-0.167156	-0.162692	B2a
TCGA-IQ-7630-01	0.41289	-0.546418	0.401463	A
TCGA-IQ-7631-01	2.35203	0.227865	-0.45833	B1b
TCGA-IQ-7632-01	2.36158	-0.116228	0.597211	A
TCGA-IQ-A61E-01	1.15466	-0.448502	0.513878	A
TCGA-IQ-A61G-01	3.08056	0.0876211	0.0220125	A
TCGA-IQ-A61H-01	26.61	0.446798	-0.570841	B2b
TCGA-IQ-A61I-01	12.8468	0.354608	-0.41955	B2a
TCGA-IQ-A61J-01	2.45719	-0.300935	0.556155	B1b
TCGA-IQ-A61O-01	1.49308	0.192989	-0.576465	B1b
TCGA-IQ-A6SG-01	50.4089	0.295151	-0.0635534	B1b
TCGA-IQ-A6SH-01	0.711067	-0.249	0.523857	A
TCGA-KU-A66S-01	218.968	0.48844	-0.652242	B2b
TCGA-KU-A66T-01	8.1827	-0.0797805	0.277392	A
TCGA-KU-A6H7-01	34.585	0.0822258	-0.412091	B2a
TCGA-KU-A6H8-01	2.4871	0.219874	-0.272548	B1b
TCGA-MT-A51W-01	0.431409	-0.398852	0.772638	A
TCGA-MT-A51X-01	1.64405	-0.423728	0.728019	A
TCGA-MT-A67A-01	0.336269	-0.328187	0.619995	A
TCGA-MT-A67D-01	1.56534	-0.151781	0.45273	B1b
TCGA-MT-A67F-01	0.415897	-0.482885	0.721176	A
TCGA-MT-A7BN-01	7.67106	0.16867	-0.486502	B2b
TCGA-MZ-A5BI-01	88.5663	0.431034	-0.306791	B2b
TCGA-MZ-A6I9-01	10.094	0.303817	-0.358907	B2a
TCGA-MZ-A7D7-01	26.7577	0.155749	0.352863	B1b
TCGA-P3-A5Q5-01	1.44477	-0.182246	-0.45172	B2a
TCGA-P3-A5Q6-01	48.5906	0.196243	-0.295496	B1b
TCGA-P3-A5QA-01	2.35576	-0.0247021	-0.432586	B1b
TCGA-P3-A5QE-01	1.96338	0.338951	-0.537976	B2a
TCGA-P3-A5QF-01	6.14028	0.140292	-0.0738606	B2a
TCGA-P3-A6SW-01	9.58496	0.176701	-0.570196	B2a
TCGA-P3-A6SX-01	1.22304	-0.274282	0.160065	A
TCGA-P3-A6T0-01	3.7694	-0.175611	0.0274766	A
TCGA-P3-A6T2-01	0.856994	-0.525839	0.341661	A
TCGA-P3-A6T3-01	1.82568	-0.363898	0.639068	A
TCGA-P3-A6T4-01	13.7326	0.125084	0.47513	B1b
TCGA-P3-A6T5-01	10.4986	-0.271215	0.494146	A
TCGA-P3-A6T6-01	0.934844	0.153987	-0.345525	B2a
TCGA-P3-A6T7-01	0.59291	-0.413998	0.644521	A
TCGA-P3-A6T8-01	45.1831	0.278393	-0.518303	B1b
TCGA-QK-A64Z-01	1.03814	-0.436168	0.0677638	A
TCGA-QK-A652-01	2.61999	-0.379181	0.621276	B1b
TCGA-QK-A6IF-01	26.0183	0.415194	-0.65101	B2b
TCGA-QK-A6IG-01	79.7413	-0.286347	-0.368874	A
TCGA-QK-A6IH-01	0.766191	-0.186839	0.504515	A
TCGA-QK-A6II-01	0.570278	-0.2399	0.715333	A
TCGA-QK-A6IJ-01	0.300842	-0.0201682	0.504962	A
TCGA-QK-A6V9-01	4.79331	0.351525	-0.560354	B2a
TCGA-QK-A6VB-01	0.622397	0.231196	-0.536282	B1a
TCGA-QK-A6VC-01	1.1017	-0.282915	-0.152031	A
TCGA-QK-A8Z7-01	66.1967	0.489924	-0.623862	B2b
TCGA-QK-A8Z8-01	184.355	0.417474	-0.461521	B1a
TCGA-QK-A8Z9-01	28.7904	0.0439104	-0.458205	B1b
TCGA-QK-A8ZA-01	80.0418	0.433071	-0.474961	B2b
TCGA-QK-A8ZB-01	3.34023	0.0633353	0.442735	B1b
TCGA-QK-AA3J-01	0.541348	0.155247	-0.521544	B1a
TCGA-QK-AA3K-01	57.1777	0.237017	-0.704761	B1b
TCGA-RS-A6TO-01	2.67512	-0.0555289	-0.110408	B1b
TCGA-RS-A6TP-01	2.1933	0.157468	-0.124431	B2a
TCGA-T2-A6WX-01	0.247265	-0.461915	-0.00844232	A
TCGA-T2-A6WZ-01	3.3309	0.0558087	0.226975	A
TCGA-T2-A6X0-01	27.9495	0.445026	-0.646526	B2a
TCGA-T2-A6X2-01	0.581313	-0.537745	0.678156	A
TCGA-T3-A92M-01	4.94684	0.321278	-0.647733	B1b
TCGA-T3-A92N-01	2.84772	-0.180593	-0.153772	A
TCGA-TN-A7HI-01	28.8067	0.380451	-0.593606	B2b
TCGA-TN-A7HJ-01	0.743492	-0.345256	0.421092	B1b
TCGA-TN-A7HL-01	2.31721	0.0152114	-0.399859	B2a
TCGA-UF-A718-01	51.308	0.103532	0.242674	B1b
TCGA-UF-A719-01	7.51843	0.297318	-0.143733	B1a
TCGA-UF-A71A-01	4.77974	0.514609	-0.623742	B2b
TCGA-UF-A71B-01	4.2688	0.213361	-0.36928	B1b
TCGA-UF-A71D-01	13.0876	0.162137	-0.0751523	B1a
TCGA-UF-A71E-01	8.4684	0.373088	-0.192199	B2b
TCGA-UF-A7J9-01	49.0921	0.563086	-0.70896	B2b
TCGA-UF-A7JA-01	41.9224	0.521582	-0.518887	B2b
TCGA-UF-A7JC-01	0.48026	-0.332211	0.72455	A
TCGA-UF-A7JD-01	7.10233	0.327877	-0.675557	B2b
TCGA-UF-A7JF-01	56.1765	0.271926	-0.193028	B1a
TCGA-UF-A7JH-01	7.08087	-0.0808992	0.271636	B1a
TCGA-UF-A7JJ-01	38.8574	0.0547884	0.278756	B1b
TCGA-UF-A7JK-01	0.454534	-0.30275	0.261893	A
TCGA-UF-A7JO-01	8.89351	-0.134333	-0.438391	A
TCGA-UF-A7JS-01	2.49644	-0.0776833	0.0942715	A
TCGA-UF-A7JT-01	0.577937	-0.539056	0.35606	A
TCGA-UF-A7JV-01	0.509254	-0.363104	-0.0375486	A
TCGA-UP-A6WW-01	4.65581	0.282561	-0.541922	B2a
TCGA-WA-A7GZ-01	1.86004	-0.136516	-0.168751	B1b
TCGA-WA-A7H4-01	7.30043	0.153279	-0.511572	B1b

## Sheet: Source Data Fig. 2A
Source data Fig. 2A: Fraction Genome Altered of UCHL1-related (B1a&B2b) and other (A&B1b) cluster in TCGA-HNSC
Sample ID	Fraction Genome Altered	Classification
TCGA-4P-AA8J-01	0.1796	Other
TCGA-BA-4074-01	0.3538	UCHL1-related
TCGA-BA-4076-01	0.3845	Other
TCGA-BA-4078-01	0.8913	UCHL1-related
TCGA-BA-5149-01	0.3454	Other
TCGA-BA-5151-01	0.1237	Other
TCGA-BA-5152-01	0.1818	Other
TCGA-BA-5555-01	0.5479	UCHL1-related
TCGA-BA-5556-01	0.0485	Other
TCGA-BA-5557-01	0.1165	Other
TCGA-BA-5558-01	0.2506	Other
TCGA-BA-6868-01	0.3255	Other
TCGA-BA-6869-01	0.1887	UCHL1-related
TCGA-BA-6870-01	0.3398	Other
TCGA-BA-6872-01	0.374	Other
TCGA-BA-6873-01	0.1428	Other
TCGA-BA-7269-01	0.5872	Other
TCGA-BA-A4IF-01	0.2665	UCHL1-related
TCGA-BA-A4IH-01	0.2767	UCHL1-related
TCGA-BA-A4II-01	0.1109	Other
TCGA-BA-A6D8-01	0.316	UCHL1-related
TCGA-BA-A6DA-01	0.2383	Other
TCGA-BA-A6DB-01	0.0246	Other
TCGA-BA-A6DD-01	0.0949	Other
TCGA-BA-A6DE-01	0.378	UCHL1-related
TCGA-BA-A6DG-01	0.0038	Other
TCGA-BA-A6DI-01	0.1216	Other
TCGA-BA-A6DJ-01	0.0785	Other
TCGA-BA-A6DL-01	0.244	UCHL1-related
TCGA-BA-A8YP-01	0.6997	UCHL1-related
TCGA-BB-4217-01	0.0018	Other
TCGA-BB-4224-01	0.4213	Other
TCGA-BB-4227-01	0.3874	Other
TCGA-BB-7862-01	0.3282	UCHL1-related
TCGA-BB-7863-01	0.1056	Other
TCGA-BB-7864-01	0.2114	UCHL1-related
TCGA-BB-7870-01	0.2445	UCHL1-related
TCGA-BB-7871-01	0.367	UCHL1-related
TCGA-BB-7872-01	0.241	Other
TCGA-BB-8596-01	0.0938	Other
TCGA-BB-8601-01	0.6811	UCHL1-related
TCGA-BB-A5HU-01	0.2682	Other
TCGA-BB-A5HY-01	0.5991	Other
TCGA-BB-A5HZ-01	0.1401	UCHL1-related
TCGA-BB-A6UO-01	0.2414	Other
TCGA-C9-A47Z-01	0.1739	Other
TCGA-C9-A480-01	0.1993	Other
TCGA-CN-4722-01	0.0009	Other
TCGA-CN-4723-01	0.2561	Other
TCGA-CN-4725-01	0.459	Other
TCGA-CN-4726-01	0.211	Other
TCGA-CN-4727-01	0.3556	UCHL1-related
TCGA-CN-4728-01	0.0739	Other
TCGA-CN-4729-01	0.2879	Other
TCGA-CN-4730-01	0.353	UCHL1-related
TCGA-CN-4731-01	0.2947	UCHL1-related
TCGA-CN-4733-01	0	Other
TCGA-CN-4734-01		Other
TCGA-CN-4735-01	0.2864	UCHL1-related
TCGA-CN-4736-01	0.196	Other
TCGA-CN-4737-01	0.5123	Other
TCGA-CN-4738-01	0.0323	Other
TCGA-CN-4739-01	0.2445	UCHL1-related
TCGA-CN-4740-01	0.0905	Other
TCGA-CN-4742-01	0.2166	Other
TCGA-CN-5355-01	0.2288	Other
TCGA-CN-5356-01	0.1952	UCHL1-related
TCGA-CN-5358-01	0.0018	Other
TCGA-CN-5359-01	0.0897	Other
TCGA-CN-5360-01	0.5	UCHL1-related
TCGA-CN-5361-01		Other
TCGA-CN-5363-01	0.3273	Other
TCGA-CN-5364-01	0.1862	Other
TCGA-CN-5365-01	0.1416	Other
TCGA-CN-5366-01	0.2376	Other
TCGA-CN-5367-01	0.3108	Other
TCGA-CN-5369-01	0.0005	Other
TCGA-CN-5370-01	0.1292	Other
TCGA-CN-5373-01	0.1594	Other
TCGA-CN-6010-01	0.3306	UCHL1-related
TCGA-CN-6011-01	0.442	Other
TCGA-CN-6012-01	0.4471	UCHL1-related
TCGA-CN-6013-01	0.2763	Other
TCGA-CN-6016-01	0.1403	Other
TCGA-CN-6017-01	0.0001	Other
TCGA-CN-6018-01	0.1026	Other
TCGA-CN-6019-01	0.0392	UCHL1-related
TCGA-CN-6020-01	0.1576	Other
TCGA-CN-6021-01	0.3948	UCHL1-related
TCGA-CN-6022-01	0.0999	Other
TCGA-CN-6023-01	0.1986	UCHL1-related
TCGA-CN-6024-01	0.5433	UCHL1-related
TCGA-CN-6988-01	0.5143	UCHL1-related
TCGA-CN-6989-01	0.3249	UCHL1-related
TCGA-CN-6992-01	0.4104	UCHL1-related
TCGA-CN-6994-01	0.3253	Other
TCGA-CN-6995-01	0.2863	Other
TCGA-CN-6996-01	0.1769	Other
TCGA-CN-6997-01	0.7999	UCHL1-related
TCGA-CN-6998-01	0.1345	Other
TCGA-CN-A497-01	0.2546	UCHL1-related
TCGA-CN-A498-01	0.2341	Other
TCGA-CN-A499-01	0.1901	Other
TCGA-CN-A49A-01	0.4892	UCHL1-related
TCGA-CN-A49B-01	0.3023	Other
TCGA-CN-A63T-01	0.2206	UCHL1-related
TCGA-CN-A63U-01	0.4811	UCHL1-related
TCGA-CN-A63V-01	0.0008	Other
TCGA-CN-A63W-01	0.3791	UCHL1-related
TCGA-CN-A641-01	0.2637	UCHL1-related
TCGA-CN-A642-01	0.0824	Other
TCGA-CN-A6V3-01	0.2037	UCHL1-related
TCGA-CQ-5324-01	0.011	Other
TCGA-CQ-5325-01	0.005	Other
TCGA-CQ-5326-01	0.1624	Other
TCGA-CQ-5327-01	0.0138	Other
TCGA-CQ-5329-01	0.1229	Other
TCGA-CQ-5330-01	0.1885	Other
TCGA-CQ-5331-01	0.0265	Other
TCGA-CQ-5332-01	0.3611	UCHL1-related
TCGA-CQ-5333-01	0.0004	Other
TCGA-CQ-5334-01	0.0981	Other
TCGA-CQ-6218-01	0.1608	Other
TCGA-CQ-6219-01		Other
TCGA-CQ-6220-01	0.3463	Other
TCGA-CQ-6222-01		Other
TCGA-CQ-6223-01	0.1507	Other
TCGA-CQ-6224-01	0.245	Other
TCGA-CQ-6225-01	0.6841	UCHL1-related
TCGA-CQ-6227-01	0.1945	Other
TCGA-CQ-6228-01	0.3456	UCHL1-related
TCGA-CQ-6229-01	0.0253	Other
TCGA-CQ-7063-01	0.0656	Other
TCGA-CQ-7065-01	0.2876	Other
TCGA-CQ-7067-01	0.5318	Other
TCGA-CQ-7068-01	0.1123	Other
TCGA-CQ-7069-01	0.1652	Other
TCGA-CQ-7071-01	0.001	Other
TCGA-CQ-7072-01	0.4041	UCHL1-related
TCGA-CQ-A4C6-01	0.2501	Other
TCGA-CQ-A4C9-01	0.339	UCHL1-related
TCGA-CQ-A4CA-01	0.0453	Other
TCGA-CQ-A4CB-01	0.2187	Other
TCGA-CQ-A4CD-01	0.2614	Other
TCGA-CQ-A4CE-01	0.0814	Other
TCGA-CQ-A4CG-01	0.2261	Other
TCGA-CQ-A4CH-01	0.0008	Other
TCGA-CQ-A4CI-01	0.5465	UCHL1-related
TCGA-CR-5247-01	0.5693	UCHL1-related
TCGA-CR-6471-01	0.1235	Other
TCGA-CR-6474-01	0.287	Other
TCGA-CR-6477-01	0.2852	Other
TCGA-CR-6478-01	0.1351	Other
TCGA-CR-6481-01	0.0501	Other
TCGA-CR-6484-01	0.1514	Other
TCGA-CR-6488-01	0.2558	Other
TCGA-CR-6491-01	0.283	Other
TCGA-CR-6492-01	0.0001	Other
TCGA-CR-6493-01	0.2889	Other
TCGA-CR-7364-01	0.2932	UCHL1-related
TCGA-CR-7365-01	0.2677	Other
TCGA-CR-7367-01	0.2035	Other
TCGA-CR-7370-01	0.6178	UCHL1-related
TCGA-CR-7371-01	0.1991	UCHL1-related
TCGA-CR-7372-01	0.1459	Other
TCGA-CR-7373-01	0.1516	Other
TCGA-CR-7374-01	0.479	UCHL1-related
TCGA-CR-7376-01	0.0129	Other
TCGA-CR-7377-01	0.0092	Other
TCGA-CR-7379-01	0.1619	Other
TCGA-CR-7380-01	0.2324	Other
TCGA-CR-7382-01	0.0377	Other
TCGA-CR-7383-01	0.3844	Other
TCGA-CR-7386-01	0.0991	Other
TCGA-CR-7388-01	0.1637	UCHL1-related
TCGA-CR-7389-01	0.1658	Other
TCGA-CR-7390-01	0.3645	Other
TCGA-CR-7391-01	0.0001	Other
TCGA-CR-7392-01	0.0238	Other
TCGA-CR-7393-01	0	Other
TCGA-CR-7394-01	0.0001	Other
TCGA-CR-7395-01	0.0136	Other
TCGA-CR-7397-01	0.0552	Other
TCGA-CR-7398-01	0.4782	UCHL1-related
TCGA-CR-7401-01	0.1246	Other
TCGA-CR-7402-01	0.2517	UCHL1-related
TCGA-CV-5430-01	0.4336	Other
TCGA-CV-5432-01	0.4216	Other
TCGA-CV-5434-01	0.7048	UCHL1-related
TCGA-CV-5435-01	0.3332	UCHL1-related
TCGA-CV-5436-01	0.3463	Other
TCGA-CV-5439-01	0.2599	Other
TCGA-CV-5440-01	0.6986	Other
TCGA-CV-5441-01	0.2079	UCHL1-related
TCGA-CV-5442-01	0.7226	Other
TCGA-CV-5444-01	0.346	Other
TCGA-CV-5966-01	0.2279	Other
TCGA-CV-5970-01	0.2467	Other
TCGA-CV-5971-01	0.0007	Other
TCGA-CV-5973-01	0.5004	Other
TCGA-CV-5976-01	0.2357	Other
TCGA-CV-5977-01	0.3094	Other
TCGA-CV-5978-01	0.348	UCHL1-related
TCGA-CV-5979-01	0.2397	Other
TCGA-CV-6003-01	0.331	Other
TCGA-CV-6436-01	0.0485	Other
TCGA-CV-6441-01	0.2755	UCHL1-related
TCGA-CV-6933-01	0.4379	Other
TCGA-CV-6934-01	0.1792	Other
TCGA-CV-6935-01	0.4128	UCHL1-related
TCGA-CV-6936-01	0.3578	Other
TCGA-CV-6937-01	0.3247	UCHL1-related
TCGA-CV-6938-01	0.005	Other
TCGA-CV-6940-01	0.4675	Other
TCGA-CV-6941-01	0.3856	UCHL1-related
TCGA-CV-6942-01	0.1333	Other
TCGA-CV-6943-01	0	Other
TCGA-CV-6945-01	0.3319	Other
TCGA-CV-6948-01	0.4042	UCHL1-related
TCGA-CV-6950-01	0.4599	Other
TCGA-CV-6951-01	0.4094	Other
TCGA-CV-6952-01	0.1629	Other
TCGA-CV-6953-01	0.0915	Other
TCGA-CV-6954-01	0.3989	UCHL1-related
TCGA-CV-6955-01	0.0066	Other
TCGA-CV-6956-01	0.2451	Other
TCGA-CV-6959-01	0.1605	Other
TCGA-CV-6960-01	0.3291	UCHL1-related
TCGA-CV-6961-01	0.2411	UCHL1-related
TCGA-CV-6962-01	0.8305	UCHL1-related
TCGA-CV-7089-01	0.1511	Other
TCGA-CV-7090-01	0.2892	Other
TCGA-CV-7091-01	0.563	UCHL1-related
TCGA-CV-7095-01	0.3012	Other
TCGA-CV-7097-01	0.1773	Other
TCGA-CV-7099-01	0.1744	Other
TCGA-CV-7101-01	0.3809	UCHL1-related
TCGA-CV-7102-01	0.4787	Other
TCGA-CV-7103-01	0.348	UCHL1-related
TCGA-CV-7104-01	0.2764	Other
TCGA-CV-7177-01	0.3302	UCHL1-related
TCGA-CV-7178-01	0.2657	Other
TCGA-CV-7180-01	0.2127	Other
TCGA-CV-7183-01	0.0005	Other
TCGA-CV-7235-01	0.525	Other
TCGA-CV-7236-01	0.048	Other
TCGA-CV-7238-01	0.0359	Other
TCGA-CV-7242-01	0.2875	UCHL1-related
TCGA-CV-7243-01	0.4589	Other
TCGA-CV-7245-01	0.5777	UCHL1-related
TCGA-CV-7247-01	0.3738	Other
TCGA-CV-7248-01	0.113	UCHL1-related
TCGA-CV-7250-01	0.2094	UCHL1-related
TCGA-CV-7252-01	0.1167	Other
TCGA-CV-7253-01	0.2475	UCHL1-related
TCGA-CV-7254-01	0.4541	UCHL1-related
TCGA-CV-7255-01	0.3032	Other
TCGA-CV-7261-01	0.4758	UCHL1-related
TCGA-CV-7263-01	0.2066	Other
TCGA-CV-7407-01	0.3592	Other
TCGA-CV-7409-01	0.3653	UCHL1-related
TCGA-CV-7410-01	0	Other
TCGA-CV-7411-01	0.0002	Other
TCGA-CV-7413-01	0.2974	Other
TCGA-CV-7414-01	0.3305	Other
TCGA-CV-7415-01	0.3208	Other
TCGA-CV-7416-01	0.4904	Other
TCGA-CV-7418-01	0.4307	UCHL1-related
TCGA-CV-7421-01	0.3867	Other
TCGA-CV-7422-01	0.0506	Other
TCGA-CV-7423-01	0.4833	Other
TCGA-CV-7424-01	0.411	UCHL1-related
TCGA-CV-7425-01	0.0456	Other
TCGA-CV-7427-01	0.0895	Other
TCGA-CV-7428-01	0.1694	UCHL1-related
TCGA-CV-7429-01	0.1421	Other
TCGA-CV-7430-01	0.3328	Other
TCGA-CV-7432-01	0.1877	Other
TCGA-CV-7433-01	0.0344	Other
TCGA-CV-7434-01	0.2889	Other
TCGA-CV-7435-01	0.3433	Other
TCGA-CV-7437-01	0.4746	UCHL1-related
TCGA-CV-7438-01	0.1335	Other
TCGA-CV-7440-01	0.2416	UCHL1-related
TCGA-CV-7446-01		UCHL1-related
TCGA-CV-7568-01		Other
TCGA-CV-A45O-01	0.0005	Other
TCGA-CV-A45P-01	0.0498	Other
TCGA-CV-A45Q-01	0.1485	Other
TCGA-CV-A45R-01	0.3399	Other
TCGA-CV-A45T-01	0	Other
TCGA-CV-A45U-01	0.3169	UCHL1-related
TCGA-CV-A45V-01	0.0552	Other
TCGA-CV-A45W-01	0.2211	UCHL1-related
TCGA-CV-A45X-01	0.2519	Other
TCGA-CV-A45Y-01	0.0576	Other
TCGA-CV-A45Z-01	0.16	UCHL1-related
TCGA-CV-A461-01	0.2506	UCHL1-related
TCGA-CV-A463-01	0.1438	Other
TCGA-CV-A464-01	0.1583	Other
TCGA-CV-A465-01	0.3791	Other
TCGA-CV-A468-01	0.0001	Other
TCGA-CV-A6JD-01	0.1139	Other
TCGA-CV-A6JE-01	0.3677	Other
TCGA-CV-A6JM-01	0.3046	Other
TCGA-CV-A6JN-01	0.1717	Other
TCGA-CV-A6JO-01	0.0657	Other
TCGA-CV-A6JT-01	0.1937	Other
TCGA-CV-A6JU-01	0.2905	UCHL1-related
TCGA-CV-A6JY-01	0.0473	Other
TCGA-CV-A6JZ-01	0.1668	Other
TCGA-CV-A6K0-01	0.0033	Other
TCGA-CV-A6K1-01	0.1285	Other
TCGA-CV-A6K2-01	0.0051	Other
TCGA-CX-7085-01	0.0001	Other
TCGA-CX-7086-01	0.528	Other
TCGA-CX-7219-01	0.3261	Other
TCGA-CX-A4AQ-01	0.238	UCHL1-related
TCGA-D6-6515-01	0.0001	Other
TCGA-D6-6516-01	0.2259	Other
TCGA-D6-6517-01	0.2155	Other
TCGA-D6-6823-01	0.2858	UCHL1-related
TCGA-D6-6824-01	0	Other
TCGA-D6-6825-01	0.223	Other
TCGA-D6-6826-01	0.17	Other
TCGA-D6-6827-01	0.2221	UCHL1-related
TCGA-D6-8568-01	0.2938	Other
TCGA-D6-8569-01	0.1953	Other
TCGA-D6-A4Z9-01	0.2597	Other
TCGA-D6-A4ZB-01	0.1811	Other
TCGA-D6-A6EK-01	0.1087	Other
TCGA-D6-A6EM-01	0.1246	Other
TCGA-D6-A6EN-01	0.0848	Other
TCGA-D6-A6EO-01	0.3017	UCHL1-related
TCGA-D6-A6EP-01	0.5413	UCHL1-related
TCGA-D6-A6EQ-01	0.2528	Other
TCGA-D6-A6ES-01	0.2554	Other
TCGA-D6-A74Q-01	0.2724	UCHL1-related
TCGA-DQ-5624-01	0.2012	Other
TCGA-DQ-5625-01	0.0713	Other
TCGA-DQ-5629-01	0.5949	UCHL1-related
TCGA-DQ-5630-01	0.0154	Other
TCGA-DQ-5631-01	0.4958	Other
TCGA-DQ-7588-01	0.2885	Other
TCGA-DQ-7589-01	0.5559	UCHL1-related
TCGA-DQ-7592-01	0.5117	Other
TCGA-DQ-7595-01	0.2151	UCHL1-related
TCGA-F7-7848-01	0.399	UCHL1-related
TCGA-F7-8298-01	0.235	Other
TCGA-F7-8489-01	0.0176	Other
TCGA-F7-A50G-01	0.0889	Other
TCGA-F7-A50I-01	0.3358	Other
TCGA-F7-A50J-01	0.2063	Other
TCGA-F7-A61S-01	0.1578	Other
TCGA-F7-A61V-01	0.1758	UCHL1-related
TCGA-F7-A61W-01	0.2286	Other
TCGA-F7-A620-01	0.1364	Other
TCGA-F7-A622-01	0.2958	Other
TCGA-F7-A623-01	0.4198	Other
TCGA-F7-A624-01	0.0972	Other
TCGA-H7-7774-01	0.094	Other
TCGA-H7-8501-01	0.064	Other
TCGA-H7-8502-01	0.2676	Other
TCGA-H7-A6C4-01	0.1181	Other
TCGA-HD-7229-01	0.2621	Other
TCGA-HD-7753-01	0.6883	Other
TCGA-HD-7831-01	0.1615	Other
TCGA-HD-7832-01	0.2117	Other
TCGA-HD-7917-01	0.3084	UCHL1-related
TCGA-HD-8224-01	0.4096	Other
TCGA-HD-8634-01	0.0778	Other
TCGA-HD-8635-01	0.3144	Other
TCGA-HD-A4C1-01	0.0277	Other
TCGA-HD-A633-01	0.2835	Other
TCGA-HD-A634-01	0.1289	UCHL1-related
TCGA-HD-A6HZ-01	0.2109	Other
TCGA-HD-A6I0-01	0.2201	Other
TCGA-IQ-7630-01	0.2336	Other
TCGA-IQ-7631-01	0.1334	Other
TCGA-IQ-7632-01	0.0083	Other
TCGA-IQ-A61E-01	0.1543	Other
TCGA-IQ-A61G-01	0.5367	Other
TCGA-IQ-A61H-01	0.2847	UCHL1-related
TCGA-IQ-A61J-01	0.3108	Other
TCGA-IQ-A61O-01	0.2394	Other
TCGA-IQ-A6SG-01	0.4185	Other
TCGA-IQ-A6SH-01	0.2993	Other
TCGA-KU-A66S-01	0.082	UCHL1-related
TCGA-KU-A66T-01	0.6284	Other
TCGA-KU-A6H8-01	0.001	Other
TCGA-MT-A51W-01	0.1729	Other
TCGA-MT-A51X-01	0.2533	Other
TCGA-MT-A67A-01	0.1969	Other
TCGA-MT-A67D-01	0.2075	Other
TCGA-MT-A67F-01	0.0132	Other
TCGA-MT-A7BN-01	0.5624	UCHL1-related
TCGA-MZ-A5BI-01	0.3136	UCHL1-related
TCGA-MZ-A7D7-01	0.3913	Other
TCGA-P3-A5Q6-01	0.2121	Other
TCGA-P3-A5QA-01	0.2479	Other
TCGA-P3-A6SX-01	0.381	Other
TCGA-P3-A6T0-01	0.0691	Other
TCGA-P3-A6T2-01	0.2051	Other
TCGA-P3-A6T3-01	0.4518	Other
TCGA-P3-A6T4-01	0.4418	Other
TCGA-P3-A6T5-01	0.584	Other
TCGA-P3-A6T7-01	0.2731	Other
TCGA-P3-A6T8-01	0.315	Other
TCGA-QK-A64Z-01	0.2322	Other
TCGA-QK-A652-01	0.1815	Other
TCGA-QK-A6IF-01	0.1406	UCHL1-related
TCGA-QK-A6IG-01	0.2171	Other
TCGA-QK-A6IH-01	0.3592	Other
TCGA-QK-A6II-01	0.0945	Other
TCGA-QK-A6IJ-01	0.1438	Other
TCGA-QK-A6VB-01	0.5754	UCHL1-related
TCGA-QK-A6VC-01	0.0732	Other
TCGA-QK-A8Z7-01	0.4264	UCHL1-related
TCGA-QK-A8Z8-01	0.2972	UCHL1-related
TCGA-QK-A8Z9-01	0.5697	Other
TCGA-QK-A8ZA-01	0.5583	UCHL1-related
TCGA-QK-A8ZB-01	0.2888	Other
TCGA-QK-AA3J-01	0.3387	UCHL1-related
TCGA-QK-AA3K-01	0.1746	Other
TCGA-RS-A6TO-01	0.1907	Other
TCGA-T2-A6WX-01	0.1121	Other
TCGA-T2-A6WZ-01	0.4796	Other
TCGA-T2-A6X2-01	0.0806	Other
TCGA-T3-A92M-01	0.4339	Other
TCGA-T3-A92N-01	0.6137	Other
TCGA-TN-A7HI-01	0.774	UCHL1-related
TCGA-TN-A7HJ-01	0.2009	Other
TCGA-UF-A718-01	0.3409	Other
TCGA-UF-A719-01	0.64	UCHL1-related
TCGA-UF-A71A-01	0.6276	UCHL1-related
TCGA-UF-A71B-01	0.3212	Other
TCGA-UF-A71D-01	0.3085	UCHL1-related
TCGA-UF-A71E-01	0.5862	UCHL1-related
TCGA-UF-A7J9-01	0.3349	UCHL1-related
TCGA-UF-A7JA-01	0.181	UCHL1-related
TCGA-UF-A7JC-01	0.2157	Other
TCGA-UF-A7JD-01	0.3036	UCHL1-related
TCGA-UF-A7JF-01	0.3616	UCHL1-related
TCGA-UF-A7JH-01	0.5358	UCHL1-related
TCGA-UF-A7JJ-01	0.0709	Other
TCGA-UF-A7JK-01	0.5789	Other
TCGA-UF-A7JO-01	0.0568	Other
TCGA-UF-A7JS-01	0.3547	Other
TCGA-UF-A7JT-01	0.1049	Other
TCGA-UF-A7JV-01	0.1025	Other
TCGA-WA-A7GZ-01	0.2798	Other
TCGA-WA-A7H4-01	0.0084	Other

## Sheet: Source Data Fig. 2B
Source data Fig. 2B: Fisher exact test (by ConVaQ) for genomic regions with significant differences between UCHL1-related and other cancers within TCGA-HNSC
chromosome	start	end	length	type	p-value
1	161109019	161254885	145868	Gain	2.7435e-11
1	169724780	169728136	3358	Gain	3.78874e-11
1	165799023	165827220	28199	Gain	3.78874e-11
1	169578587	169581257	2672	Gain	3.78874e-11
1	165830273	165832982	2711	Gain	3.78874e-11
1	170430956	170450158	19204	Gain	3.78874e-11
1	166571026	166573129	2105	Gain	3.78874e-11
1	165036996	165046514	9520	Gain	3.78874e-11
1	161297097	161311218	14123	Gain	3.78874e-11
1	170450159	170868608	418451	Gain	8.21726e-11
1	166573130	167848839	1275711	Gain	8.21726e-11
1	160818784	160827226	8444	Gain	8.21726e-11
1	160933468	161109018	175552	Gain	8.21726e-11
1	161254886	161297096	42212	Gain	8.21726e-11
1	161311219	162153324	842107	Gain	8.21726e-11
1	162179167	162770647	591482	Gain	8.21726e-11
1	162772985	162783073	10090	Gain	8.21726e-11
1	162785796	163483608	697814	Gain	8.21726e-11
1	163491472	163607633	116163	Gain	8.21726e-11
1	163714720	163802975	88257	Gain	8.21726e-11
1	163815644	163829348	13706	Gain	8.21726e-11
1	164213842	164233072	19232	Gain	8.21726e-11
1	164238595	165003462	764869	Gain	8.21726e-11
1	165003613	165036995	33384	Gain	8.21726e-11
1	165046515	165504848	458335	Gain	8.21726e-11
1	165516740	165654526	137788	Gain	8.21726e-11
1	165656105	165799022	142919	Gain	8.21726e-11
1	165827221	165830272	3053	Gain	8.21726e-11
1	165832983	166380891	547910	Gain	8.21726e-11
1	166384625	166571025	186402	Gain	8.21726e-11
1	167849897	168333807	483912	Gain	8.21726e-11
1	168536076	168542080	6006	Gain	8.21726e-11
1	170875948	172121788	1245842	Gain	8.21726e-11
1	168544231	169562904	1018675	Gain	8.21726e-11
1	169563062	169578586	15526	Gain	8.21726e-11
1	169581258	169724779	143523	Gain	8.21726e-11
1	169728137	169873168	145033	Gain	8.21726e-11
1	169950354	170430955	480603	Gain	8.21726e-11
1	179186852	179197656	10806	Gain	1.13498e-10
1	169873169	169950353	77186	Gain	1.73402e-10
1	170868609	170875947	7340	Gain	1.73402e-10
1	163607634	163714719	107087	Gain	1.73402e-10
1	180570408	180598226	27820	Gain	1.73402e-10
1	160827227	160933467	106242	Gain	1.73402e-10
1	163829349	164213841	384494	Gain	1.73402e-10
1	162153325	162155094	1771	Gain	1.73402e-10
1	163802976	163815643	12669	Gain	1.73402e-10
1	172121789	172889867	768080	Gain	1.73402e-10
1	159962477	160818783	856308	Gain	1.73402e-10
1	165654527	165656104	1579	Gain	1.73402e-10
1	162783074	162785795	2723	Gain	2.41706e-10
1	180121836	180271108	149274	Gain	2.41706e-10
1	179799430	180051057	251629	Gain	2.41706e-10
1	179661035	179794437	133404	Gain	2.41706e-10
1	179197657	179653124	455469	Gain	2.41706e-10
1	179079190	179186851	107663	Gain	2.41706e-10
1	180309185	180543538	234355	Gain	2.41706e-10
1	180740025	180755660	15637	Gain	2.41706e-10
1	162770648	162772984	2338	Gain	2.41706e-10
1	179067071	179078027	10958	Gain	2.41706e-10
1	169562905	169563061	158	Gain	2.41706e-10
1	168542081	168544230	2151	Gain	2.41706e-10
1	168333808	168536075	202269	Gain	2.41706e-10
1	167848840	167849896	1058	Gain	2.41706e-10
1	166380892	166384624	3734	Gain	2.41706e-10
1	165504849	165516739	11892	Gain	2.41706e-10
1	165003463	165003612	151	Gain	2.41706e-10
1	164233073	164238594	5523	Gain	2.41706e-10
1	163483609	163491471	7864	Gain	2.41706e-10
1	157138750	157240454	101706	Gain	3.33909e-10
1	172889868	174234339	1344473	Gain	4.70728e-10
1	162155095	162179166	24073	Gain	4.70728e-10
1	180598227	180740024	141799	Gain	7.48328e-10
1	180543539	180570407	26870	Gain	7.48328e-10
1	180051058	180121835	70779	Gain	7.48328e-10
1	174916163	174951067	34906	Gain	7.48328e-10
1	174507941	174559182	51243	Gain	7.48328e-10
1	159814844	159962476	147634	Gain	7.48328e-10
1	180755661	180809981	54322	Gain	7.48328e-10
1	174234340	174273823	39485	Gain	7.92785e-10
1	159117691	159129578	11889	Gain	9.64546e-10
1	175013165	175101994	88831	Gain	1.18009e-09
1	174303151	174362377	59228	Gain	1.18009e-09
1	175105068	175430211	325145	Gain	1.18009e-09
1	174367148	174507940	140794	Gain	1.18009e-09
1	174951068	175002690	51624	Gain	1.18009e-09
1	159244974	159683761	438789	Gain	1.23142e-09
1	179794438	179799429	4993	Gain	1.23142e-09
1	180271109	180309184	38077	Gain	1.23142e-09
1	159129579	159237652	108075	Gain	1.23142e-09
1	158900275	159117690	217417	Gain	1.23142e-09
1	158671017	158889424	218409	Gain	1.23142e-09
1	179653125	179661034	7911	Gain	1.23142e-09
1	179078028	179079189	1163	Gain	1.23142e-09
1	177963645	179067070	1103427	Gain	1.23142e-09
1	158140885	158149551	8668	Gain	1.23142e-09
1	157683728	157687951	4225	Gain	1.23142e-09
1	156214112	156233479	19369	Gain	1.23142e-09
1	157240455	157318524	78071	Gain	1.23142e-09
1	156760887	157138749	377864	Gain	1.23142e-09
1	156285526	156379144	93620	Gain	1.23142e-09
1	149882014	149882014	2	Gain	1.32108e-09
1	235887277	235888061	786	Gain	1.55374e-09
1	235906793	235909268	2477	Gain	1.55374e-09
1	180809982	180892951	82971	Gain	1.7841e-09
1	174559183	174755597	196416	Gain	1.7841e-09
1	177797814	177837062	39250	Gain	1.7841e-09
1	158550080	158671016	120938	Gain	1.7841e-09
1	158409196	158513514	104320	Gain	1.7841e-09
1	158149552	158406920	257370	Gain	1.7841e-09
1	159683762	159814843	131083	Gain	1.7841e-09
1	157687952	158140884	452934	Gain	1.7841e-09
1	175825860	177054880	1229022	Gain	1.7841e-09
1	174914278	174916162	1886	Gain	1.7841e-09
1	157318525	157683727	365204	Gain	1.7841e-09
1	177837428	177963644	126218	Gain	1.7841e-09
1	177056187	177796542	740357	Gain	1.7841e-09
1	174273824	174303150	29328	Gain	2.10915e-09
1	235888062	235906792	18732	Gain	2.58491e-09
1	235909269	235956595	47328	Gain	2.58491e-09
1	235880869	235887276	6409	Gain	2.58491e-09
1	236890997	236893716	2721	Gain	2.58491e-09
1	156233480	156285525	52047	Gain	2.76075e-09
1	174861594	174863042	1450	Gain	2.76075e-09
1	159237653	159244973	7322	Gain	2.76075e-09
1	155180361	155240238	59879	Gain	2.76075e-09
1	158889425	158900274	10851	Gain	2.76075e-09
1	155971692	156214111	242421	Gain	2.76075e-09
1	156385388	156433182	47796	Gain	2.76075e-09
1	156379145	156383209	4066	Gain	2.76075e-09
1	156490980	156494349	3371	Gain	2.76075e-09
1	156667061	156760886	93827	Gain	2.76075e-09
1	153431420	153481717	50299	Gain	2.76075e-09
1	177837063	177837427	366	Gain	3.06595e-09
1	175430212	175825859	395649	Gain	3.06595e-09
1	175101995	175105067	3074	Gain	3.06595e-09
1	175002691	175013164	10475	Gain	3.06595e-09
1	174362378	174367147	4771	Gain	3.06595e-09
1	180892952	183085695	2192745	Gain	3.06595e-09
1	149882015	149884926	2913	Gain	3.74865e-09
1	237618035	237618226	193	Gain	3.87916e-09
1	234036808	234036822	16	Gain	3.87916e-09
1	234977109	234981866	4759	Gain	3.87916e-09
1	233964018	233966322	2306	Gain	3.87916e-09
1	206595010	206890435	295427	Gain	3.87916e-09
1	152869140	152874444	5306	Gain	4.40816e-09
1	174827824	174836526	8704	Gain	4.48725e-09
1	174863043	174914277	51236	Gain	4.48725e-09
1	174755598	174808605	53009	Gain	4.48725e-09
1	154726568	154789923	63357	Gain	4.48725e-09
1	154961817	155006954	45139	Gain	4.48725e-09
1	158406921	158409195	2276	Gain	4.48725e-09
1	158513515	158514197	684	Gain	4.48725e-09
1	156433183	156490979	57798	Gain	4.48725e-09
1	155131674	155180360	48688	Gain	4.48725e-09
1	177796543	177797813	1272	Gain	4.48725e-09
1	150335348	150335739	393	Gain	4.48725e-09
1	158514211	158515023	814	Gain	4.48725e-09
1	177054881	177056186	1307	Gain	4.48725e-09
1	155008610	155086147	77539	Gain	4.48725e-09
1	156494350	156667060	172712	Gain	4.48725e-09
1	183123542	183124865	1325	Gain	5.62723e-09
1	183197174	183197437	265	Gain	5.62723e-09
1	183204478	183206572	2096	Gain	5.62723e-09
1	183085696	183085990	296	Gain	5.62723e-09
1	183158974	183186096	27124	Gain	6.34644e-09
1	236893717	236894049	334	Gain	6.63945e-09
1	152874445	153122009	247566	Gain	6.65054e-09
1	174859415	174861593	2180	Gain	6.65054e-09
1	155240239	155413510	173273	Gain	6.65054e-09
1	156383210	156385387	2179	Gain	6.65054e-09
1	154222033	154225343	3312	Gain	6.65054e-09
1	153423249	153431419	8172	Gain	6.65054e-09
1	155881888	155971691	89805	Gain	6.65054e-09
1	153481718	153607231	125515	Gain	6.65054e-09
1	155415976	155804532	388558	Gain	6.65054e-09
1	154130372	154131196	826	Gain	6.65054e-09
1	152434192	152869139	434949	Gain	6.65054e-09
1	150335740	150527955	192217	Gain	8.06657e-09
1	184907142	184913957	6817	Gain	8.06657e-09
1	155086148	155131673	45527	Gain	8.06657e-09
1	150138910	150335347	196439	Gain	8.06657e-09
1	154637388	154726567	89181	Gain	8.06657e-09
1	154922088	154961816	39730	Gain	8.06657e-09
1	154789924	154797394	7472	Gain	8.06657e-09
1	240818649	240820516	1869	Gain	9.84498e-09
1	206890436	207462821	572387	Gain	9.84498e-09
1	233959406	233964017	4613	Gain	9.84498e-09
1	203663091	203862442	199353	Gain	9.84498e-09
1	232021249	232147167	125920	Gain	9.84498e-09
1	237358549	237365647	7100	Gain	9.84498e-09
1	203406330	203571882	165554	Gain	9.84498e-09
1	204727382	206595009	1867629	Gain	9.84498e-09
1	203881082	204663217	782137	Gain	9.84498e-09
1	149884927	149898950	14025	Gain	1.00541e-08
1	233696812	233957385	260575	Gain	1.10446e-08
1	238038889	238043277	4390	Gain	1.10446e-08
1	233966323	234036807	70486	Gain	1.10446e-08
1	234981867	235880868	899003	Gain	1.10446e-08
1	233684175	233696588	12415	Gain	1.10446e-08
1	238070460	238452924	382466	Gain	1.10446e-08
1	234036823	234908287	871466	Gain	1.10446e-08
1	233307332	233680563	373233	Gain	1.10446e-08
1	236604211	236786379	182170	Gain	1.10446e-08
1	236900538	236901817	1281	Gain	1.10446e-08
1	237618227	237870886	252661	Gain	1.10446e-08
1	234930171	234977108	46939	Gain	1.10446e-08
1	237542122	237618034	75914	Gain	1.10446e-08
1	232163177	233295282	1132107	Gain	1.10446e-08
1	236327761	236595286	267527	Gain	1.10446e-08
1	246185981	247047608	861629	Gain	1.10446e-08
1	236786473	236890996	104525	Gain	1.10446e-08
1	235956596	236302734	346140	Gain	1.10446e-08
1	236900218	236900294	78	Gain	1.10446e-08
1	158515024	158550079	35057	Gain	1.15787e-08
1	155006955	155008609	1656	Gain	1.15787e-08
1	174836527	174859414	22889	Gain	1.15787e-08
1	153389560	153423248	33690	Gain	1.15787e-08
1	155804533	155881887	77356	Gain	1.15787e-08
1	174808606	174827823	19219	Gain	1.15787e-08
1	153607232	154130371	523141	Gain	1.15787e-08
1	154131197	154222032	90837	Gain	1.15787e-08
1	149899948	149938744	38798	Gain	1.15787e-08
1	154225344	154427337	201995	Gain	1.15787e-08
1	152223997	152434191	210196	Gain	1.15787e-08
1	158514198	158514210	14	Gain	1.15787e-08
1	183124866	183158973	34109	Gain	1.3958e-08
1	183186097	183197173	11078	Gain	1.3958e-08
1	183765914	183827351	61439	Gain	1.3958e-08
1	183085991	183123541	37552	Gain	1.3958e-08
1	183197438	183204477	7041	Gain	1.3958e-08
1	183545238	183547872	2636	Gain	1.3958e-08
1	183206573	183482865	276294	Gain	1.3958e-08
1	215963375	215968462	5089	Gain	1.45587e-08
1	238034983	238038888	3907	Gain	1.47648e-08
1	236900295	236900537	244	Gain	1.47648e-08
1	236901818	236901818	2	Gain	1.47648e-08
1	245873836	245884770	10936	Gain	1.47648e-08
1	245770486	245864789	94305	Gain	1.47648e-08
1	236894050	236900217	6169	Gain	1.47648e-08
1	238043278	238070459	27183	Gain	1.47648e-08
1	245609134	245726316	117184	Gain	1.50359e-08
1	149881398	149882013	617	Gain	1.56309e-08
1	153122010	153231482	109474	Gain	1.67033e-08
1	155413511	155415975	2466	Gain	1.67033e-08
1	149898951	149899947	998	Gain	1.67033e-08
1	247812431	247813706	1277	Gain	2.10412e-08
1	184463863	184667270	203409	Gain	2.22145e-08
1	184913958	185219718	305762	Gain	2.22145e-08
1	150527956	150615186	87232	Gain	2.22145e-08
1	150647988	150667113	19127	Gain	2.22145e-08
1	184667551	184907141	239592	Gain	2.22145e-08
1	244312728	244313135	409	Gain	2.26513e-08
1	245884771	245965333	80564	Gain	2.26513e-08
1	246024836	246185980	161146	Gain	2.26513e-08
1	245734029	245770485	36458	Gain	2.26513e-08
1	247047609	247065347	17740	Gain	2.26513e-08
1	233696589	233696811	224	Gain	2.34051e-08
1	233680564	233684174	3612	Gain	2.34051e-08
1	233957386	233959405	2021	Gain	2.34051e-08
1	233295283	233307331	12050	Gain	2.34051e-08
1	237132720	237358548	225830	Gain	2.34051e-08
1	232147168	232163176	16010	Gain	2.34051e-08
1	208579404	208582121	2719	Gain	2.34051e-08
1	207712848	207731374	18528	Gain	2.34051e-08
1	236786380	236786472	94	Gain	2.34051e-08
1	237365648	237542121	176475	Gain	2.34051e-08
1	232015835	232021248	5415	Gain	2.34051e-08
1	236302735	236327760	25027	Gain	2.34051e-08
1	236595287	236604210	8925	Gain	2.34051e-08
1	237870887	237971523	100638	Gain	2.34051e-08
1	238452925	238778606	325683	Gain	2.34051e-08
1	239233498	239269279	35783	Gain	2.34051e-08
1	240006786	240084576	77792	Gain	2.34051e-08
1	203571883	203663090	91209	Gain	2.34051e-08
1	240091765	240339811	248048	Gain	2.34051e-08
1	240340147	240818648	478503	Gain	2.34051e-08
1	236901819	237131705	229888	Gain	2.34051e-08
1	242619825	242924181	304358	Gain	2.34051e-08
1	153231483	153389559	158078	Gain	3.00636e-08
1	183827352	184463862	636512	Gain	3.24927e-08
1	183547873	183765913	218042	Gain	3.24927e-08
1	150615187	150647987	32802	Gain	3.24927e-08
1	190069886	190083399	13515	Gain	3.24927e-08
1	183482866	183545237	62373	Gain	3.24927e-08
1	245589788	245609133	19347	Gain	3.35207e-08
1	237971524	238034982	63460	Gain	3.43196e-08
1	242924182	243017512	93332	Gain	3.43196e-08
1	209633237	209646058	12823	Gain	3.43196e-08
1	209487905	209512896	24993	Gain	3.43196e-08
1	240339812	240340146	336	Gain	3.43196e-08
1	245864790	245873835	9047	Gain	3.43196e-08
1	238894307	239233497	339192	Gain	3.43196e-08
1	239269280	239350637	81359	Gain	3.43196e-08
1	239564683	240006785	442104	Gain	3.43196e-08
1	152144019	152223996	79979	Gain	3.63339e-08
1	149938745	150029982	91239	Gain	3.63339e-08
1	186076893	186078616	1725	Gain	3.63339e-08
1	154427338	154637387	210051	Gain	3.63339e-08
1	186161673	186162071	400	Gain	3.63339e-08
1	150030777	150138909	108134	Gain	3.63339e-08
1	151411636	151416520	4886	Gain	3.63339e-08
1	151478478	151761660	283184	Gain	3.63339e-08
1	154797395	154922087	124694	Gain	3.63339e-08
1	228295201	228295573	374	Gain	3.78182e-08
1	202863276	203406329	543055	Gain	3.78182e-08
1	216187482	216701163	513683	Gain	3.78182e-08
1	240820517	240825299	4784	Gain	3.78182e-08
1	215968463	216181480	213019	Gain	3.78182e-08
1	228802766	228808365	5601	Gain	3.78182e-08
1	210460603	210729242	268641	Gain	3.78182e-08
1	209964876	210458860	493986	Gain	3.78182e-08
1	228244825	228245730	907	Gain	3.78182e-08
1	231356302	231358367	2067	Gain	3.78182e-08
1	214556746	215285311	728567	Gain	3.78182e-08
1	202332388	202860739	528353	Gain	3.78182e-08
1	202861342	202861566	226	Gain	3.78182e-08
1	207573336	207587363	14029	Gain	3.78182e-08
1	207462822	207547303	84483	Gain	3.78182e-08
1	242400314	242402389	2077	Gain	3.78182e-08
1	228096311	228098339	2030	Gain	3.78182e-08
1	215290544	215303554	13012	Gain	3.78182e-08
1	226232106	226243695	11591	Gain	3.78182e-08
1	204663218	204727381	64165	Gain	3.78182e-08
1	215307335	215963374	656041	Gain	3.78182e-08
1	203862443	203881081	18640	Gain	3.78182e-08
1	247810288	247812430	2144	Gain	4.79699e-08
1	186495488	186499535	4049	Gain	4.94756e-08
1	151805015	152144018	339005	Gain	4.94756e-08
1	185219719	186076892	857175	Gain	4.94756e-08
1	151056650	151331304	274656	Gain	4.94756e-08
1	151331787	151331787	2	Gain	4.94756e-08
1	186492041	186495340	3301	Gain	4.94756e-08
1	186078617	186161672	83057	Gain	4.94756e-08
1	184667271	184667550	281	Gain	4.94756e-08
1	151803764	151804907	1145	Gain	4.94756e-08
1	186162072	186323878	161808	Gain	4.94756e-08
1	150029983	150030776	795	Gain	4.94756e-08
1	186560979	186603937	42960	Gain	4.94756e-08
1	150667114	150706806	39694	Gain	4.94756e-08
1	150941236	151043211	101977	Gain	4.94756e-08
1	151761661	151798767	37108	Gain	4.94756e-08
1	150707856	150739670	31816	Gain	4.94756e-08
1	151331927	151411635	79710	Gain	4.94756e-08
1	151416521	151478477	61958	Gain	4.94756e-08
1	150740724	150900306	159584	Gain	4.94756e-08
1	234908288	234930170	21884	Gain	5.24725e-08
1	208582122	209197254	615134	Gain	5.24725e-08
1	230142243	230452322	310081	Gain	5.24725e-08
1	238778607	238850919	72314	Gain	5.24725e-08
1	230591096	230868063	276969	Gain	5.24725e-08
1	201267183	201480660	213479	Gain	5.24725e-08
1	230452453	230578629	126178	Gain	5.24725e-08
1	209957769	209964875	7108	Gain	5.24725e-08
1	241606791	241873498	266709	Gain	5.24725e-08
1	242402390	242619824	217436	Gain	5.24725e-08
1	230870256	231356301	486047	Gain	5.24725e-08
1	207547304	207573335	26033	Gain	5.24725e-08
1	242289296	242400313	111019	Gain	5.24725e-08
1	231358368	232015834	657468	Gain	5.24725e-08
1	207587364	207712847	125485	Gain	5.24725e-08
1	229661787	230136986	475201	Gain	5.24725e-08
1	210458861	210460602	1743	Gain	5.24725e-08
1	241878547	241920285	41740	Gain	5.24725e-08
1	197593211	197660798	67589	Gain	5.24725e-08
1	226243696	226347352	103658	Gain	5.24725e-08
1	226353654	226601884	248232	Gain	5.24725e-08
1	208529629	208579403	49776	Gain	5.24725e-08
1	226604519	227005004	400487	Gain	5.24725e-08
1	240084577	240091764	7189	Gain	5.24725e-08
1	228808366	229637469	829105	Gain	5.24725e-08
1	240825300	241406434	581136	Gain	5.24725e-08
1	227787820	228096310	308492	Gain	5.24725e-08
1	228098340	228150720	52382	Gain	5.24725e-08
1	237131706	237132719	1015	Gain	5.24725e-08
1	241410203	241586687	176486	Gain	5.24725e-08
1	209276515	209283079	6566	Gain	5.24725e-08
1	209723579	209725447	1870	Gain	5.24725e-08
1	207731375	207868962	137589	Gain	5.24725e-08
1	208003510	208528629	525121	Gain	5.24725e-08
1	228176817	228244824	68009	Gain	5.24725e-08
1	241925711	241931406	5697	Gain	5.24725e-08
1	228245731	228295200	49471	Gain	5.24725e-08
1	228295574	228802765	507193	Gain	5.24725e-08
1	193037742	193102369	64629	Gain	5.32376e-08
1	193357461	193362793	5334	Gain	5.32376e-08
1	193255077	193354071	98996	Gain	5.32376e-08
1	245015214	245071985	56773	Gain	5.42139e-08
1	245726317	245734028	7713	Gain	5.42139e-08
1	244159143	244312727	153586	Gain	5.42139e-08
1	243865149	244158552	293405	Gain	5.42139e-08
1	245422841	245475778	52939	Gain	5.42139e-08
1	245162040	245322600	160562	Gain	5.42139e-08
1	245475824	245490514	14692	Gain	5.42139e-08
1	243620087	243799788	179703	Gain	5.42139e-08
1	244855073	244891672	36601	Gain	5.42139e-08
1	244313136	244552288	239154	Gain	5.42139e-08
1	247065348	247807326	741980	Gain	5.42139e-08
1	211785565	211785602	39	Gain	6.24765e-08
1	195649242	195785467	136227	Gain	6.24765e-08
1	216181481	216187481	6002	Gain	6.24765e-08
1	211790343	211790689	348	Gain	6.24765e-08
1	210887986	210890625	2641	Gain	6.24765e-08
1	247807327	247807327	2	Gain	7.39006e-08
1	243799789	243865148	65361	Gain	7.39006e-08
1	245580080	245589787	9709	Gain	7.39006e-08
1	188678210	188684617	6409	Gain	7.68292e-08
1	186973367	186976100	2735	Gain	7.68292e-08
1	150900307	150941235	40930	Gain	7.80386e-08
1	186495341	186495487	148	Gain	7.80386e-08
1	186388320	186492040	103722	Gain	7.80386e-08
1	186499536	186560978	61444	Gain	7.80386e-08
1	186323879	186380442	56565	Gain	7.80386e-08
1	190083400	190305525	222127	Gain	7.80386e-08
1	189963356	190069885	106531	Gain	7.80386e-08
1	221986696	221996737	10043	Gain	8.1263e-08
1	202285017	202332387	47372	Gain	8.1263e-08
1	202860740	202861341	603	Gain	8.1263e-08
1	228150721	228176816	26097	Gain	8.1263e-08
1	221548968	221549722	756	Gain	8.1263e-08
1	223954870	224299175	344307	Gain	8.1263e-08
1	215285312	215290543	5233	Gain	8.1263e-08
1	195785468	196551732	766266	Gain	8.1263e-08
1	211090173	211785564	695393	Gain	8.1263e-08
1	224306164	224331778	25616	Gain	8.1263e-08
1	215303555	215307334	3781	Gain	8.1263e-08
1	227098122	227110731	12611	Gain	8.1263e-08
1	210729243	210887985	158744	Gain	8.1263e-08
1	210890626	211080938	190314	Gain	8.1263e-08
1	214508310	214556745	48437	Gain	8.1263e-08
1	202861567	202863275	1710	Gain	8.1263e-08
1	211790690	214495703	2705015	Gain	8.1263e-08
1	201607767	202161644	553879	Gain	8.1263e-08
1	216701164	216722850	21688	Gain	8.1263e-08
1	226231512	226232105	595	Gain	8.1263e-08
1	216728761	217384596	655837	Gain	8.1263e-08
1	211785603	211790342	4741	Gain	8.1263e-08
1	217396066	217435636	39572	Gain	8.1263e-08
1	238850920	238855281	4363	Gain	8.15146e-08
1	230452323	230452452	131	Gain	8.15146e-08
1	245965334	245989255	23923	Gain	8.15146e-08
1	238862449	238894306	31859	Gain	8.15146e-08
1	241406435	241410202	3769	Gain	8.15146e-08
1	209725448	209747472	22026	Gain	8.15146e-08
1	209937694	209957768	20076	Gain	8.15146e-08
1	207868963	208003509	134548	Gain	8.15146e-08
1	209283080	209487904	204826	Gain	8.15146e-08
1	242221002	242289295	68295	Gain	8.15146e-08
1	229637470	229661786	24318	Gain	8.15146e-08
1	209646059	209665860	19803	Gain	8.92201e-08
1	209512897	209633236	120341	Gain	8.92201e-08
1	243017513	243042266	24755	Gain	8.92201e-08
1	239350638	239564682	214046	Gain	8.92201e-08
1	246015491	246024835	9346	Gain	8.92201e-08
1	245992703	246015204	22503	Gain	8.92201e-08
1	245989256	245992701	3447	Gain	8.92201e-08
1	243591556	243620086	28532	Gain	1.14997e-07
1	244158553	244159142	591	Gain	1.14997e-07
1	243581344	243590704	9362	Gain	1.14997e-07
1	245992702	245992702	2	Gain	1.14997e-07
1	244552289	244855072	302785	Gain	1.14997e-07
1	243410077	243578812	168737	Gain	1.14997e-07
1	244891673	245015213	123542	Gain	1.14997e-07
1	243042267	243355771	313506	Gain	1.14997e-07
1	245071986	245162039	90055	Gain	1.14997e-07
1	245322601	245422840	100241	Gain	1.14997e-07
1	245490515	245545143	54630	Gain	1.14997e-07
1	245475779	245475823	46	Gain	1.14997e-07
1	151804908	151805014	108	Gain	1.15258e-07
1	150739671	150740723	1054	Gain	1.15258e-07
1	150706807	150707855	1050	Gain	1.15258e-07
1	189240142	189256791	16651	Gain	1.15258e-07
1	188684618	189099261	414645	Gain	1.15258e-07
1	186603938	186973366	369430	Gain	1.15258e-07
1	188331520	188678209	346691	Gain	1.15258e-07
1	151043212	151056649	13439	Gain	1.15258e-07
1	151798768	151803763	4997	Gain	1.15258e-07
1	151331305	151331786	483	Gain	1.15258e-07
1	186976101	187268766	292667	Gain	1.15258e-07
1	187274226	187301085	26861	Gain	1.15258e-07
1	151331788	151331926	140	Gain	1.15258e-07
1	187305285	187641214	335931	Gain	1.15258e-07
1	187645892	187707021	61131	Gain	1.15258e-07
1	241586688	241606790	20104	Gain	1.2154e-07
1	219687432	219687432	2	Gain	1.2154e-07
1	219688079	220868444	1180367	Gain	1.2154e-07
1	220879617	221068543	188928	Gain	1.2154e-07
1	241873499	241878546	5049	Gain	1.2154e-07
1	201480661	201607766	127107	Gain	1.2154e-07
1	196551733	197202783	651052	Gain	1.2154e-07
1	197273258	197593210	319954	Gain	1.2154e-07
1	230136987	230142242	5257	Gain	1.2154e-07
1	241931407	242040128	108723	Gain	1.2154e-07
1	230868064	230870255	2193	Gain	1.2154e-07
1	221996738	223933078	1936342	Gain	1.2154e-07
1	197660799	200775082	3114285	Gain	1.2154e-07
1	223933147	223954869	21724	Gain	1.2154e-07
1	217384597	217396065	11470	Gain	1.2154e-07
1	227263235	227787819	524586	Gain	1.2154e-07
1	227110732	227201265	90535	Gain	1.2154e-07
1	221205065	221214013	8950	Gain	1.2154e-07
1	227005005	227098121	93118	Gain	1.2154e-07
1	221549723	221986695	436974	Gain	1.2154e-07
1	226601885	226604518	2635	Gain	1.2154e-07
1	221307760	221548967	241209	Gain	1.2154e-07
1	209197255	209276514	79261	Gain	1.2154e-07
1	226347353	226353653	6302	Gain	1.2154e-07
1	230578630	230591095	12467	Gain	1.2154e-07
1	241920286	241925710	5426	Gain	1.2154e-07
1	200871844	201267182	395340	Gain	1.2154e-07
1	226113914	226231511	117599	Gain	1.2154e-07
1	225498723	226068926	570205	Gain	1.2154e-07
1	225329726	225496381	166657	Gain	1.2154e-07
1	224864706	225296796	432092	Gain	1.2154e-07
1	224331779	224704396	372619	Gain	1.2154e-07
1	208528630	208529628	1000	Gain	1.2154e-07
1	194516653	195649241	1132590	Gain	1.27966e-07
1	193102370	193255076	152708	Gain	1.27966e-07
1	193362794	193502759	139967	Gain	1.27966e-07
1	245545144	245580079	34937	Gain	1.67719e-07
1	243355772	243410076	54306	Gain	1.67719e-07
1	247807328	247810287	2961	Gain	1.67719e-07
1	188165647	188172756	7111	Gain	1.72263e-07
1	209747473	209922667	175196	Gain	1.81277e-07
1	246015205	246015490	287	Gain	1.81277e-07
1	209665861	209723578	57719	Gain	1.81277e-07
1	209937252	209937693	443	Gain	1.81277e-07
1	218193515	218812829	619316	Gain	1.82523e-07
1	202161645	202199044	37401	Gain	1.82523e-07
1	202200799	202285016	84219	Gain	1.82523e-07
1	224299176	224306163	6989	Gain	1.82523e-07
1	219643356	219643648	294	Gain	1.82523e-07
1	219591134	219591274	142	Gain	1.82523e-07
1	219545667	219545689	24	Gain	1.82523e-07
1	219253519	219253705	188	Gain	1.82523e-07
1	211080939	211090172	9235	Gain	1.82523e-07
1	214495704	214508309	12607	Gain	1.82523e-07
1	216722851	216728760	5911	Gain	1.82523e-07
1	217435637	217490895	55260	Gain	1.82523e-07
1	219167050	219170866	3818	Gain	1.82523e-07
1	217742751	217975829	233080	Gain	1.82523e-07
1	218142275	218177532	35259	Gain	1.82523e-07
1	218821159	219064024	242867	Gain	1.82523e-07
1	186380443	186388319	7878	Gain	1.8954e-07
1	189785984	189963355	177373	Gain	1.8954e-07
1	189256792	189747430	490640	Gain	1.8954e-07
1	191607440	191637866	30428	Gain	2.05608e-07
1	190305526	190375776	70252	Gain	2.05608e-07
1	192784546	193037741	253197	Gain	2.05608e-07
1	193354072	193357460	3390	Gain	2.05608e-07
1	243590705	243591555	852	Gain	2.5364e-07
1	243578813	243581343	2532	Gain	2.5364e-07
1	209922668	209937251	14585	Gain	2.5364e-07
1	187972655	188165646	192993	Gain	2.74432e-07
1	189099262	189240141	140881	Gain	2.74432e-07
1	187268767	187274225	5460	Gain	2.74432e-07
1	187301086	187305284	4200	Gain	2.74432e-07
1	187641215	187645891	4678	Gain	2.74432e-07
1	188172757	188331519	158764	Gain	2.74432e-07
1	187707022	187922875	215855	Gain	2.74432e-07
1	193737458	194278594	541138	Gain	2.77027e-07
1	194365121	194516652	151533	Gain	2.77027e-07
1	192612681	192784545	171866	Gain	2.77027e-07
1	193502760	193722542	219784	Gain	2.77027e-07
1	190375777	191607439	1231664	Gain	2.77027e-07
1	191637867	192495174	857309	Gain	2.77027e-07
1	225296797	225327461	30666	Gain	2.9024e-07
1	224704397	224864705	160310	Gain	2.9024e-07
1	225327613	225329725	2114	Gain	2.9024e-07
1	225496382	225498722	2342	Gain	2.9024e-07
1	226068927	226113913	44988	Gain	2.9024e-07
1	242040129	242221001	180874	Gain	2.9024e-07
1	223933079	223933146	69	Gain	2.9024e-07
1	221068544	221113051	44509	Gain	2.9024e-07
1	200775083	200871843	96762	Gain	2.9024e-07
1	238855282	238862448	7168	Gain	2.9024e-07
1	221118814	221205064	86252	Gain	2.9024e-07
1	221214014	221307759	93747	Gain	2.9024e-07
1	197202784	197273257	70475	Gain	2.9024e-07
1	225327462	225327612	152	Gain	3.867e-07
1	218182257	218193514	11259	Gain	4.19354e-07
1	218812830	218821158	8330	Gain	4.19354e-07
1	194278595	194365120	86527	Gain	4.19354e-07
1	218177533	218180530	2999	Gain	4.19354e-07
1	202199045	202200798	1755	Gain	4.19354e-07
1	189747431	189785983	38554	Gain	4.26509e-07
1	219687433	219688078	647	Gain	4.72895e-07
1	219170867	219253518	82653	Gain	4.72895e-07
1	227201266	227263234	61970	Gain	4.72895e-07
1	219064025	219167049	103026	Gain	4.72895e-07
1	217490896	217742750	251856	Gain	4.72895e-07
1	220868445	220879616	11173	Gain	4.72895e-07
1	217975830	218142274	166446	Gain	4.72895e-07
1	219474503	219545666	71165	Gain	4.72895e-07
1	219643649	219687431	43784	Gain	4.72895e-07
1	219591275	219643355	52082	Gain	4.72895e-07
1	219253706	219468510	214806	Gain	4.72895e-07
1	219545690	219591133	45445	Gain	4.72895e-07
1	221113052	221118813	5763	Gain	5.96012e-07
1	192495175	192612680	117507	Gain	6.2006e-07
1	193722543	193737457	14916	Gain	6.2006e-07
1	187922876	187972654	49780	Gain	6.68485e-07
1	219468511	219474502	5993	Gain	9.31154e-07
1	218180531	218182256	1727	Gain	1.47792e-06
1	120527361	120527361	2	Gain	3.51586e-05
1	149879545	149881397	1854	Gain	4.25259e-05
1	120523955	120527360	3407	Gain	0.000297407
1	120527362	149879544	29352184	Gain	0.000297407
1	120523902	120523954	54	Gain	0.000457442
1	120520715	120522600	1887	Gain	0.000549761
1	27297049	27340552	43505	Loss	1.22231e-16
1	27174966	27290508	115544	Loss	1.22231e-16
1	27057365	27067678	10315	Loss	1.3572e-16
1	27015185	27025800	10617	Loss	1.3572e-16
1	27025801	27057364	31565	Loss	4.60041e-16
1	27067679	27089268	21591	Loss	4.60041e-16
1	27089566	27174965	85401	Loss	4.60041e-16
1	26850295	27015184	164891	Loss	4.60041e-16
1	27290509	27297048	6541	Loss	4.60041e-16
1	27340553	27690297	349746	Loss	4.60041e-16
1	25698469	25734252	35785	Loss	4.60041e-16
1	27690298	27728040	37744	Loss	1.70528e-15
1	24055718	24092424	36708	Loss	1.70528e-15
1	26474424	26850294	375872	Loss	1.70528e-15
1	25734253	26471742	737491	Loss	1.70528e-15
1	24094209	24452762	358555	Loss	1.70528e-15
1	27089269	27089565	298	Loss	1.70528e-15
1	25337588	25698468	360882	Loss	1.70528e-15
1	25028068	25310514	282448	Loss	1.70528e-15
1	24453079	25023049	569972	Loss	1.70528e-15
1	25310682	25316924	6244	Loss	1.70528e-15
1	25317228	25335717	18491	Loss	1.70528e-15
1	15113844	15119830	5988	Loss	4.48085e-15
1	15120527	15193855	73330	Loss	4.48085e-15
1	11923982	11924026	46	Loss	5.35203e-15
1	23865060	23890781	25723	Loss	5.35203e-15
1	25023050	25028067	5019	Loss	5.35203e-15
1	24452763	24453078	317	Loss	5.35203e-15
1	26471743	26474423	2682	Loss	5.35203e-15
1	24092425	24094208	1785	Loss	5.35203e-15
1	25335718	25337587	1871	Loss	5.35203e-15
1	25310515	25310681	168	Loss	6.22502e-15
1	23987169	24055717	68550	Loss	6.22502e-15
1	27728041	27737417	9378	Loss	6.22502e-15
1	25316925	25317227	304	Loss	6.22502e-15
1	15119831	15120526	697	Loss	1.29913e-14
1	15071735	15113843	42110	Loss	1.59534e-14
1	23958921	23959613	694	Loss	1.59534e-14
1	14439900	14446517	6619	Loss	1.59534e-14
1	14934613	14934649	38	Loss	1.59534e-14
1	15037966	15038771	807	Loss	1.59534e-14
1	21126072	21126410	340	Loss	1.59534e-14
1	15193856	15208212	14358	Loss	1.59534e-14
1	11924027	11924027	2	Loss	1.59534e-14
1	10869731	10869922	193	Loss	1.91386e-14
1	22757362	22844951	87591	Loss	1.91386e-14
1	23182684	23453225	270543	Loss	1.91386e-14
1	11435943	11586677	150736	Loss	1.91386e-14
1	11128075	11376494	248421	Loss	1.91386e-14
1	10984407	11065971	81566	Loss	1.91386e-14
1	20137714	20387574	249862	Loss	1.91386e-14
1	18852833	18853490	659	Loss	1.91386e-14
1	10871942	10983229	111289	Loss	1.91386e-14
1	23890782	23957782	67002	Loss	1.91386e-14
1	21201326	21373175	171851	Loss	1.91386e-14
1	20393082	20395363	2283	Loss	1.91386e-14
1	10726689	10869545	142858	Loss	1.91386e-14
1	23453240	23865059	411821	Loss	1.91386e-14
1	23959614	23987168	27556	Loss	1.91386e-14
1	21474125	21484410	10287	Loss	1.91386e-14
1	10633245	10720745	87502	Loss	1.91386e-14
1	27737418	27806562	69146	Loss	2.23765e-14
1	7678253	7682237	3986	Loss	4.53519e-14
1	15208213	15209935	1724	Loss	5.59026e-14
1	15067575	15071734	4161	Loss	5.59026e-14
1	16407320	16408804	1486	Loss	5.59026e-14
1	15038772	15064381	25611	Loss	5.59026e-14
1	23453226	23453239	15	Loss	5.59026e-14
1	15213830	15247757	33929	Loss	5.59026e-14
1	14934650	15037965	103317	Loss	5.59026e-14
1	15985306	16012024	26720	Loss	5.59026e-14
1	14446518	14934612	488096	Loss	5.59026e-14
1	15841742	15983301	141561	Loss	5.59026e-14
1	11376495	11435942	59449	Loss	5.59026e-14
1	21126411	21129866	3457	Loss	5.59026e-14
1	15252104	15253590	1488	Loss	5.59026e-14
1	15668320	15834360	166042	Loss	5.59026e-14
1	15553764	15668275	114513	Loss	5.59026e-14
1	21132576	21201325	68751	Loss	5.59026e-14
1	23957783	23958920	1139	Loss	5.59026e-14
1	15253724	15295333	41611	Loss	5.59026e-14
1	20387575	20393081	5508	Loss	5.59026e-14
1	14386911	14439899	52990	Loss	5.59026e-14
1	14134154	14136436	2284	Loss	5.59026e-14
1	20395364	20435466	40104	Loss	5.59026e-14
1	21022115	21126071	103958	Loss	5.59026e-14
1	10591105	10633244	42141	Loss	6.73699e-14
1	22844952	23182683	337733	Loss	6.73699e-14
1	9277730	9768836	491108	Loss	6.73699e-14
1	22552938	22757361	204425	Loss	6.73699e-14
1	17677909	17699233	21326	Loss	6.73699e-14
1	22296307	22552641	256336	Loss	6.73699e-14
1	19153970	19689855	535887	Loss	6.73699e-14
1	9825990	9861608	35620	Loss	6.73699e-14
1	19014866	19153763	138899	Loss	6.73699e-14
1	21813081	21830336	17257	Loss	6.73699e-14
1	21652178	21685395	33219	Loss	6.73699e-14
1	21484411	21651574	167165	Loss	6.73699e-14
1	17699464	18232573	533111	Loss	6.73699e-14
1	16510799	17557438	1046641	Loss	6.73699e-14
1	17557838	17675121	117285	Loss	6.73699e-14
1	18853491	19012142	158653	Loss	6.73699e-14
1	10720746	10726688	5944	Loss	6.73699e-14
1	21373176	21474124	100950	Loss	6.73699e-14
1	10869546	10869730	186	Loss	6.73699e-14
1	10869923	10871941	2020	Loss	6.73699e-14
1	19862412	20092354	229944	Loss	6.73699e-14
1	11065972	11128074	62104	Loss	6.73699e-14
1	11586678	11923981	337305	Loss	6.73699e-14
1	11927057	12180123	253068	Loss	6.73699e-14
1	12180378	12354306	173930	Loss	6.73699e-14
1	17675650	17675889	241	Loss	6.73699e-14
1	18233160	18460525	227367	Loss	6.73699e-14
1	20092626	20137713	45089	Loss	6.73699e-14
1	12357986	12748734	390750	Loss	6.73699e-14
1	18467285	18478124	10841	Loss	6.73699e-14
1	12831482	13855634	1024154	Loss	6.73699e-14
1	18480498	18831012	350516	Loss	6.73699e-14
1	13855785	13885203	29420	Loss	6.73699e-14
1	13900401	14116327	215928	Loss	6.73699e-14
1	18831830	18852832	21004	Loss	6.73699e-14
1	27887025	28189694	302671	Loss	7.91951e-14
1	27806563	27871620	65059	Loss	7.91951e-14
1	7324959	7325225	268	Loss	9.59719e-14
1	7325226	7325420	196	Loss	1.23398e-13
1	8563457	8610505	47050	Loss	1.55776e-13
1	7577763	7678252	100491	Loss	1.55776e-13
1	5626094	5628914	2822	Loss	1.55776e-13
1	18232574	18233159	587	Loss	1.55776e-13
1	7326521	7420889	94370	Loss	1.55776e-13
1	7420904	7425064	4162	Loss	1.55776e-13
1	10983230	10984406	1178	Loss	1.55776e-13
1	7425417	7572261	146846	Loss	1.55776e-13
1	15064382	15067574	3194	Loss	1.55776e-13
1	21129867	21132575	2710	Loss	1.55776e-13
1	7682238	7846527	164291	Loss	1.55776e-13
1	15668276	15668319	45	Loss	1.55776e-13
1	15209936	15213829	3895	Loss	1.55776e-13
1	12355504	12357985	2483	Loss	1.92771e-13
1	14116328	14134153	17827	Loss	1.92771e-13
1	16434728	16474700	39974	Loss	1.92771e-13
1	5300338	5302168	1832	Loss	1.92771e-13
1	14136437	14240591	104156	Loss	1.92771e-13
1	16408805	16430384	21581	Loss	1.92771e-13
1	10484416	10563522	79108	Loss	1.92771e-13
1	16300399	16407319	106922	Loss	1.92771e-13
1	14243518	14386910	143394	Loss	1.92771e-13
1	10566273	10591104	24833	Loss	1.92771e-13
1	17557439	17557837	400	Loss	1.92771e-13
1	9861609	9987659	126052	Loss	1.92771e-13
1	16190109	16300009	109902	Loss	1.92771e-13
1	9768837	9825989	57154	Loss	1.92771e-13
1	16012025	16181645	169622	Loss	1.92771e-13
1	12354307	12355486	1181	Loss	1.92771e-13
1	15247758	15252103	4347	Loss	1.92771e-13
1	17699234	17699463	231	Loss	1.92771e-13
1	15253591	15253723	134	Loss	1.92771e-13
1	12748735	12831481	82748	Loss	1.92771e-13
1	9008739	9017091	8354	Loss	1.92771e-13
1	15983302	15985305	2005	Loss	1.92771e-13
1	18460526	18467284	6760	Loss	1.92771e-13
1	18478125	18480497	2374	Loss	1.92771e-13
1	5603851	5604015	166	Loss	1.92771e-13
1	8445143	8448191	3050	Loss	1.92771e-13
1	12180124	12180377	255	Loss	1.92771e-13
1	15295334	15553763	258431	Loss	1.92771e-13
1	19012143	19014865	2724	Loss	1.92771e-13
1	13855635	13855784	151	Loss	1.92771e-13
1	15834361	15841741	7382	Loss	1.92771e-13
1	19153764	19153969	207	Loss	1.92771e-13
1	19689856	19740823	50969	Loss	1.92771e-13
1	19742140	19742154	16	Loss	1.92771e-13
1	19743802	19851030	107230	Loss	1.92771e-13
1	5601949	5602683	736	Loss	1.92771e-13
1	11924028	11927056	3030	Loss	1.92771e-13
1	21651575	21652177	604	Loss	1.92771e-13
1	21685396	21813080	127686	Loss	1.92771e-13
1	20435467	21022114	586649	Loss	1.92771e-13
1	16495915	16510798	14885	Loss	1.92771e-13
1	5303447	5307296	3851	Loss	1.92771e-13
1	22552642	22552937	297	Loss	1.92771e-13
1	21830337	22296306	465971	Loss	2.33417e-13
1	18831013	18831829	818	Loss	2.33417e-13
1	9146852	9277729	130879	Loss	2.33417e-13
1	13885204	13900400	15198	Loss	2.33417e-13
1	17675890	17677908	2020	Loss	2.33417e-13
1	17675122	17675649	529	Loss	2.33417e-13
1	10036061	10167200	131141	Loss	2.33417e-13
1	28372347	28391064	18719	Loss	2.7593e-13
1	27871621	27887024	15405	Loss	2.7593e-13
1	28189695	28371574	181881	Loss	2.7593e-13
1	4882642	4882656	16	Loss	3.22381e-13
1	31852880	31890570	37692	Loss	3.5472e-13
1	7326201	7326520	321	Loss	4.15596e-13
1	7324468	7324958	492	Loss	4.15596e-13
1	7572262	7577762	5502	Loss	4.15596e-13
1	8610506	8625449	14945	Loss	5.26389e-13
1	8547881	8563456	15577	Loss	5.26389e-13
1	5879132	5879772	642	Loss	5.26389e-13
1	5563588	5601948	38362	Loss	5.26389e-13
1	5782169	5873402	91235	Loss	5.26389e-13
1	7262031	7324467	62438	Loss	5.26389e-13
1	4501877	4605402	103527	Loss	5.26389e-13
1	5778236	5778789	555	Loss	5.26389e-13
1	8173369	8445142	271775	Loss	5.26389e-13
1	4605423	4882641	277220	Loss	5.26389e-13
1	6100855	6278414	177561	Loss	5.26389e-13
1	8534406	8547879	13475	Loss	5.26389e-13
1	5628915	5776460	147547	Loss	5.26389e-13
1	7420890	7420903	15	Loss	5.26389e-13
1	4882657	5055114	172459	Loss	5.26389e-13
1	10563523	10566272	2751	Loss	5.26389e-13
1	5055864	5300337	244475	Loss	5.26389e-13
1	5302169	5303446	1279	Loss	5.26389e-13
1	14240592	14243517	2927	Loss	5.26389e-13
1	7325421	7326200	781	Loss	5.26389e-13
1	7425065	7425416	353	Loss	5.26389e-13
1	5307297	5563418	256123	Loss	5.26389e-13
1	16431035	16434727	3694	Loss	5.26389e-13
1	6286701	6403048	116349	Loss	5.26389e-13
1	10458378	10458439	63	Loss	5.26389e-13
1	5604016	5626093	22079	Loss	5.26389e-13
1	7846528	8046138	199612	Loss	5.26389e-13
1	20092355	20092625	272	Loss	5.26389e-13
1	16474701	16495914	21215	Loss	5.26389e-13
1	6281377	6281667	292	Loss	5.26389e-13
1	5602684	5603850	1168	Loss	5.26389e-13
1	77783370	77783388	20	Loss	6.54069e-13
1	16181646	16190108	8464	Loss	6.54069e-13
1	10167201	10458377	291178	Loss	6.54069e-13
1	19742155	19743801	1648	Loss	6.54069e-13
1	19740824	19742139	1317	Loss	6.54069e-13
1	9987660	10036060	48402	Loss	6.54069e-13
1	9103156	9146851	43697	Loss	6.54069e-13
1	16300010	16300398	390	Loss	6.54069e-13
1	8674646	9008738	334094	Loss	6.54069e-13
1	9017092	9093808	76718	Loss	6.54069e-13
1	77783464	77786361	2899	Loss	6.54069e-13
1	10458440	10484415	25977	Loss	6.54069e-13
1	28371575	28372346	773	Loss	7.95873e-13
1	28391065	28391065	2	Loss	7.95873e-13
1	28424911	29066143	641234	Loss	9.46294e-13
1	12355487	12355503	18	Loss	1.06492e-12
1	89069024	89069165	143	Loss	1.06492e-12
1	31843567	31852879	9314	Loss	1.23435e-12
1	31890571	31997639	107070	Loss	1.23435e-12
1	32015776	32062065	46291	Loss	1.34437e-12
1	68500883	68502735	1854	Loss	1.34437e-12
1	8547880	8547880	2	Loss	1.37662e-12
1	4605403	4605422	21	Loss	1.37662e-12
1	8473814	8534405	60593	Loss	1.37662e-12
1	16430385	16431034	651	Loss	1.37662e-12
1	8448192	8472982	24792	Loss	1.37662e-12
1	19851031	19862411	11382	Loss	1.37662e-12
1	5563419	5563587	170	Loss	1.37662e-12
1	5055115	5055863	750	Loss	1.37662e-12
1	6547671	7262030	714361	Loss	1.74965e-12
1	4316689	4501876	185189	Loss	1.74965e-12
1	9093809	9103155	9348	Loss	1.74965e-12
1	5776461	5778235	1776	Loss	1.74965e-12
1	5778790	5782168	3380	Loss	1.74965e-12
1	77786362	78115953	329593	Loss	1.74965e-12
1	5873403	5879131	5730	Loss	1.74965e-12
1	5879773	6100854	221083	Loss	1.74965e-12
1	8625450	8674645	49197	Loss	1.74965e-12
1	6278415	6281376	2963	Loss	1.74965e-12
1	4207171	4214828	7659	Loss	1.74965e-12
1	77783389	77783463	76	Loss	1.74965e-12
1	6281668	6286700	5034	Loss	1.74965e-12
1	76424440	76430158	5720	Loss	1.74965e-12
1	77080066	77783369	703305	Loss	1.74965e-12
1	4028925	4206288	177365	Loss	1.74965e-12
1	3474778	4026067	551291	Loss	1.74965e-12
1	4217088	4316543	99457	Loss	1.74965e-12
1	6403049	6542329	139282	Loss	1.74965e-12
1	3401132	3401206	76	Loss	1.74965e-12
1	8046139	8173368	127231	Loss	1.74965e-12
1	76529240	76557050	27812	Loss	1.74965e-12
1	76706973	76750645	43674	Loss	1.74965e-12
1	88740785	88740865	82	Loss	2.62817e-12
1	86413115	86413212	99	Loss	2.62817e-12
1	89069023	89069023	2	Loss	2.62817e-12
1	28391066	28424910	33846	Loss	2.67009e-12
1	29066144	29388689	322547	Loss	3.19373e-12
1	30219424	30220903	1481	Loss	3.19373e-12
1	30382557	30384611	2056	Loss	3.19373e-12
1	8472983	8473813	832	Loss	3.45883e-12
1	89069166	89259057	189893	Loss	3.45883e-12
1	88747267	89068682	321417	Loss	3.45883e-12
1	78638958	78665297	26341	Loss	3.45883e-12
1	31135468	31267172	131706	Loss	3.72665e-12
1	30515619	30516527	910	Loss	3.72665e-12
1	31700412	31843566	143156	Loss	3.72665e-12
1	31408110	31451144	43036	Loss	3.72665e-12
1	30553543	30556721	3180	Loss	3.72665e-12
1	31292642	31408055	115415	Loss	3.72665e-12
1	31625389	31625389	2	Loss	3.72665e-12
1	32062066	32497446	435382	Loss	4.22884e-12
1	32542219	32598189	55972	Loss	4.22884e-12
1	31997640	32015775	18137	Loss	4.22884e-12
1	78268192	78288314	20124	Loss	4.48401e-12
1	4026068	4028924	2858	Loss	4.48401e-12
1	3401207	3474777	73572	Loss	4.48401e-12
1	76925330	77080065	154737	Loss	4.48401e-12
1	76750646	76906319	155675	Loss	4.48401e-12
1	3218610	3255106	36498	Loss	4.48401e-12
1	6542330	6547670	5342	Loss	4.48401e-12
1	4316544	4316688	146	Loss	4.48401e-12
1	3256108	3256202	96	Loss	4.48401e-12
1	3259677	3308033	48358	Loss	4.48401e-12
1	3314597	3401131	86536	Loss	4.48401e-12
1	78115954	78154656	38704	Loss	4.48401e-12
1	93822082	94108252	286172	Loss	4.6254e-12
1	68502736	68845610	342876	Loss	4.64847e-12
1	68948840	68969841	21003	Loss	4.64847e-12
1	68847249	68901519	54272	Loss	4.64847e-12
1	32759049	32893553	134506	Loss	4.64847e-12
1	67983472	67991110	7640	Loss	4.64847e-12
1	67993782	68500882	507102	Loss	4.64847e-12
1	67992082	67993077	997	Loss	4.64847e-12
1	76557051	76706972	149923	Loss	5.71953e-12
1	76444246	76529239	84995	Loss	5.71953e-12
1	4206289	4207170	883	Loss	5.71953e-12
1	4214829	4217087	2260	Loss	5.71953e-12
1	76346213	76424439	78228	Loss	5.71953e-12
1	76430159	76441860	11703	Loss	5.71953e-12
1	76442562	76444108	1548	Loss	5.71953e-12
1	90470915	90483266	12353	Loss	6.26263e-12
1	85594437	85594759	324	Loss	6.26263e-12
1	90489966	90490106	142	Loss	6.26263e-12
1	90534638	90541704	7068	Loss	6.26263e-12
1	90495703	90509434	13733	Loss	6.26263e-12
1	92907075	92907237	164	Loss	6.26263e-12
1	92982579	92989833	7256	Loss	6.26263e-12
1	31623667	31625346	1681	Loss	7.1682e-12
1	86432186	86758777	326593	Loss	8.37265e-12
1	89068683	89069022	341	Loss	8.37265e-12
1	86947747	87277973	330228	Loss	8.37265e-12
1	87280804	87835649	554847	Loss	8.37265e-12
1	81379083	82031572	652491	Loss	8.37265e-12
1	87836556	88298612	462058	Loss	8.37265e-12
1	88644478	88740784	96308	Loss	8.37265e-12
1	86763078	86905913	142837	Loss	8.37265e-12
1	79216267	79220638	4373	Loss	8.37265e-12
1	88740866	88747266	6402	Loss	8.37265e-12
1	81210549	81378768	168221	Loss	8.37265e-12
1	86909583	86925688	16107	Loss	8.37265e-12
1	89259058	89948843	689787	Loss	8.37265e-12
1	86275285	86350856	75573	Loss	8.37265e-12
1	86413213	86432167	18956	Loss	8.37265e-12
1	86927000	86941348	14350	Loss	8.37265e-12
1	86398958	86413114	14158	Loss	8.37265e-12
1	79839035	79840516	1483	Loss	8.37265e-12
1	79687429	79689460	2033	Loss	8.37265e-12
1	85705347	85717658	12313	Loss	8.37265e-12
1	73819255	73844962	25709	Loss	8.81233e-12
1	73691230	73816563	125335	Loss	8.81233e-12
1	72663139	72667551	4414	Loss	8.81233e-12
1	73360113	73393370	33259	Loss	8.81233e-12
1	97023901	97069132	45233	Loss	1.05323e-11
1	92579244	92585040	5798	Loss	1.05323e-11
1	94108253	94111712	3461	Loss	1.05323e-11
1	91667332	91667579	249	Loss	1.05323e-11
1	94117472	94157507	40037	Loss	1.05323e-11
1	73319500	73328991	9493	Loss	1.06054e-11
1	30220904	30382007	161105	Loss	1.06054e-11
1	29388690	29757269	368581	Loss	1.06054e-11
1	30516528	30553542	37016	Loss	1.06054e-11
1	30556722	30596560	39840	Loss	1.06054e-11
1	31078837	31135467	56632	Loss	1.06054e-11
1	30384652	30515618	130968	Loss	1.06054e-11
1	31267173	31292641	25470	Loss	1.06054e-11
1	29758458	30219423	460967	Loss	1.06054e-11
1	30950475	31077465	126992	Loss	1.06054e-11
1	78288315	78638957	350644	Loss	1.1044e-11
1	85815660	85823119	7461	Loss	1.1044e-11
1	78154657	78268191	113536	Loss	1.1044e-11
1	78839350	79079565	240217	Loss	1.1044e-11
1	3255107	3255539	434	Loss	1.1044e-11
1	78665298	78832137	166841	Loss	1.1044e-11
1	3308034	3314596	6564	Loss	1.1044e-11
1	78834432	78836313	1883	Loss	1.1044e-11
1	76906320	76925329	19011	Loss	1.1044e-11
1	32497447	32534104	36659	Loss	1.24637e-11
1	32537681	32542218	4539	Loss	1.24637e-11
1	31451145	31621427	170284	Loss	1.24637e-11
1	31625390	31700411	75023	Loss	1.24637e-11
1	32598190	32690235	92047	Loss	1.24637e-11
1	31625347	31625388	43	Loss	1.24637e-11
1	68845611	68847248	1639	Loss	1.42604e-11
1	32697935	32759048	61115	Loss	1.42604e-11
1	68969842	69054604	84764	Loss	1.42604e-11
1	67938108	67983471	45365	Loss	1.42604e-11
1	68901520	68948839	47321	Loss	1.42604e-11
1	3255540	3256107	569	Loss	1.43598e-11
1	3256203	3259676	3475	Loss	1.43598e-11
1	92586080	92823597	237519	Loss	1.44408e-11
1	92828027	92907074	79049	Loss	1.44408e-11
1	92989834	93822081	832249	Loss	1.44408e-11
1	92907238	92982578	75342	Loss	1.44408e-11
1	90509435	90534637	25204	Loss	1.44408e-11
1	91114259	91451287	337030	Loss	1.44408e-11
1	90541705	91103884	562181	Loss	1.44408e-11
1	32893554	33395063	501511	Loss	1.58246e-11
1	67993078	67993781	705	Loss	1.58246e-11
1	67849409	67914486	65079	Loss	1.58246e-11
1	67991111	67992081	972	Loss	1.58246e-11
1	33395064	33459484	64422	Loss	1.69501e-11
1	35946681	35990467	43788	Loss	1.70296e-11
1	34098960	34217931	118973	Loss	1.74168e-11
1	76444109	76444245	138	Loss	1.83843e-11
1	76441861	76442561	702	Loss	1.83843e-11
1	75913826	76068961	155137	Loss	1.83843e-11
1	76076390	76096671	20283	Loss	1.83843e-11
1	76103520	76174731	71213	Loss	1.83843e-11
1	76174753	76346212	171461	Loss	1.83843e-11
1	75446585	75911819	465236	Loss	1.83843e-11
1	89948844	90360753	411911	Loss	1.95744e-11
1	85594760	85661441	66683	Loss	1.95744e-11
1	90361383	90470914	109533	Loss	1.95744e-11
1	90483267	90489965	6700	Loss	1.95744e-11
1	87277974	87280803	2831	Loss	1.95744e-11
1	85664883	85705346	40465	Loss	1.95744e-11
1	85513082	85594436	81356	Loss	1.95744e-11
1	90490107	90495702	5597	Loss	1.95744e-11
1	88631583	88644477	12896	Loss	1.95744e-11
1	86758778	86763077	4301	Loss	1.95744e-11
1	81378769	81378928	161	Loss	1.95744e-11
1	79689461	79689461	2	Loss	1.95744e-11
1	86906997	86909582	2587	Loss	1.95744e-11
1	88298613	88629773	331162	Loss	1.95744e-11
1	87835650	87836555	907	Loss	1.95744e-11
1	86350857	86398957	48102	Loss	1.95744e-11
1	86432168	86432185	19	Loss	1.95744e-11
1	73844963	73910539	65578	Loss	2.31442e-11
1	74531987	74532147	162	Loss	2.31442e-11
1	73816564	73819254	2692	Loss	2.31442e-11
1	74027162	74160948	133788	Loss	2.31442e-11
1	74535957	74648483	112528	Loss	2.31442e-11
1	74305602	74311897	6297	Loss	2.31442e-11
1	74166960	74299988	133030	Loss	2.31442e-11
1	74664177	74918026	253851	Loss	2.31442e-11
1	74936455	74946415	9962	Loss	2.31442e-11
1	73914876	73929826	14952	Loss	2.31442e-11
1	74312428	74524181	211755	Loss	2.31442e-11
1	94117423	94117432	11	Loss	2.32903e-11
1	96113250	96118825	5577	Loss	2.32903e-11
1	97757555	97803593	46040	Loss	2.32903e-11
1	91919225	91919782	559	Loss	2.32903e-11
1	94111713	94111713	2	Loss	2.32903e-11
1	86941349	86947746	6399	Loss	2.62145e-11
1	79220639	79299114	78477	Loss	2.62145e-11
1	86925689	86926999	1312	Loss	2.62145e-11
1	80514575	80606876	92303	Loss	2.62145e-11
1	83933291	84054575	121286	Loss	2.62145e-11
1	80928334	81210548	282216	Loss	2.62145e-11
1	84061516	84528433	466919	Loss	2.62145e-11
1	80735567	80928329	192764	Loss	2.62145e-11
1	79303751	79687428	383679	Loss	2.62145e-11
1	79299324	79299356	34	Loss	2.62145e-11
1	86006009	86275284	269277	Loss	2.62145e-11
1	82031573	83118043	1086472	Loss	2.62145e-11
1	85823120	85974030	150912	Loss	2.62145e-11
1	85717659	85815659	98002	Loss	2.62145e-11
1	79079566	79216266	136702	Loss	2.62145e-11
1	83284824	83933255	648433	Loss	2.62145e-11
1	80021748	80514543	492797	Loss	2.62145e-11
1	79840517	79960198	119683	Loss	2.62145e-11
1	83118076	83283627	165553	Loss	2.62145e-11
1	79706747	79839034	132289	Loss	2.62145e-11
1	72667552	72829347	161797	Loss	2.86051e-11
1	73393371	73691229	297860	Loss	2.86051e-11
1	31077833	31078539	708	Loss	2.86051e-11
1	72640979	72663138	22161	Loss	2.86051e-11
1	29757270	29758457	1189	Loss	2.86051e-11
1	31408056	31408109	55	Loss	2.86051e-11
1	71261772	71287709	25939	Loss	2.86051e-11
1	73328992	73360112	31122	Loss	2.86051e-11
1	73302556	73319499	16945	Loss	2.86051e-11
1	92585041	92586079	1040	Loss	3.22871e-11
1	96058551	96113249	54700	Loss	3.22871e-11
1	97069133	97614757	545626	Loss	3.22871e-11
1	96706183	97023900	317719	Loss	3.22871e-11
1	94117433	94117471	40	Loss	3.22871e-11
1	96118826	96325566	206742	Loss	3.22871e-11
1	94554355	94607607	53254	Loss	3.22871e-11
1	96330618	96354114	23498	Loss	3.22871e-11
1	97702252	97704797	2547	Loss	3.22871e-11
1	91103885	91114258	10375	Loss	3.22871e-11
1	94440333	94537229	96898	Loss	3.22871e-11
1	96359961	96459252	99293	Loss	3.22871e-11
1	91451288	91544965	93679	Loss	3.22871e-11
1	91554169	91667331	113164	Loss	3.22871e-11
1	96359485	96359505	22	Loss	3.22871e-11
1	91667580	91919224	251646	Loss	3.22871e-11
1	91919783	92579243	659462	Loss	3.22871e-11
1	96470908	96698658	227752	Loss	3.22871e-11
1	96701718	96704093	2377	Loss	3.22871e-11
1	94157508	94440301	282795	Loss	3.22871e-11
1	92823598	92828026	4430	Loss	3.22871e-11
1	31077466	31077832	368	Loss	3.46423e-11
1	30794570	30950474	155906	Loss	3.46423e-11
1	30596561	30774324	177765	Loss	3.46423e-11
1	30777090	30794413	17325	Loss	3.46423e-11
1	32534105	32537680	3577	Loss	3.46423e-11
1	71828033	71837378	9347	Loss	3.46423e-11
1	31078540	31078836	298	Loss	3.46423e-11
1	69054605	69114473	59870	Loss	4.10112e-11
1	32690236	32697934	7700	Loss	4.10112e-11
1	31621428	31623666	2240	Loss	4.10112e-11
1	81378929	81379082	155	Loss	4.42962e-11
1	90360754	90361382	630	Loss	4.42962e-11
1	88629774	88631582	1810	Loss	4.42962e-11
1	85661442	85664882	3442	Loss	4.42962e-11
1	86905914	86906995	1083	Loss	4.42962e-11
1	85979933	86006008	26077	Loss	4.52038e-11
1	76174732	76174752	22	Loss	4.52038e-11
1	67914487	67938107	23622	Loss	4.73211e-11
1	41459918	41484317	24401	Loss	4.82375e-11
1	39871897	39902512	30617	Loss	4.82375e-11
1	43535791	43543617	7828	Loss	4.82375e-11
1	97803594	97821080	17488	Loss	5.00976e-11
1	65746252	65776275	30025	Loss	5.30242e-11
1	65838366	66130398	292034	Loss	5.30242e-11
1	65729394	65745607	16215	Loss	5.30242e-11
1	65745731	65746031	302	Loss	5.30242e-11
1	65324189	65326959	2772	Loss	5.30242e-11
1	67544234	67849408	305176	Loss	5.30242e-11
1	66463920	66474954	11036	Loss	5.74303e-11
1	33697716	33872592	174878	Loss	5.74303e-11
1	66477046	66803547	326503	Loss	5.74303e-11
1	33873972	34098959	224989	Loss	5.74303e-11
1	33459485	33691950	232467	Loss	5.74303e-11
1	65003470	65078193	74725	Loss	5.74303e-11
1	66139097	66144875	5780	Loss	5.74303e-11
1	66253970	66462246	208278	Loss	5.74303e-11
1	74160949	74166959	6012	Loss	5.80918e-11
1	73929827	74027161	97336	Loss	5.80918e-11
1	74300005	74300016	13	Loss	5.80918e-11
1	74946416	75446584	500170	Loss	5.80918e-11
1	74311898	74312427	531	Loss	5.80918e-11
1	75911820	75913825	2007	Loss	5.80918e-11
1	76068962	76076389	7429	Loss	5.80918e-11
1	74918027	74936454	18429	Loss	5.80918e-11
1	73910540	73914875	4337	Loss	5.80918e-11
1	76096672	76103519	6849	Loss	5.80918e-11
1	35261232	35806564	545334	Loss	5.92902e-11
1	35822319	35946680	124363	Loss	5.92902e-11
1	35990468	36015490	25024	Loss	5.92902e-11
1	34246793	34247076	285	Loss	5.97658e-11
1	34247897	34248063	168	Loss	5.97658e-11
1	34217932	34240069	22139	Loss	5.97658e-11
1	79689462	79706746	17286	Loss	6.01139e-11
1	79299357	79303750	4395	Loss	6.01139e-11
1	84054576	84061515	6941	Loss	6.01139e-11
1	83933256	83933290	36	Loss	6.01139e-11
1	79299115	79299323	210	Loss	6.01139e-11
1	83283628	83284823	1197	Loss	6.01139e-11
1	83118044	83118075	33	Loss	6.01139e-11
1	84528434	84573914	45482	Loss	6.01139e-11
1	80928330	80928333	5	Loss	6.01139e-11
1	85424597	85513081	88486	Loss	6.01139e-11
1	84689946	85070877	380933	Loss	6.01139e-11
1	80662171	80735566	73397	Loss	6.01139e-11
1	80606877	80644812	37937	Loss	6.01139e-11
1	80514544	80514574	32	Loss	6.01139e-11
1	97614758	97702251	87495	Loss	7.01214e-11
1	94440302	94440332	32	Loss	7.01214e-11
1	97704798	97757554	52758	Loss	7.01214e-11
1	99148714	99183786	35074	Loss	7.01214e-11
1	99265115	99403197	138084	Loss	7.01214e-11
1	95330745	96058550	727807	Loss	7.01214e-11
1	96462707	96462717	12	Loss	7.01214e-11
1	94537230	94554354	17126	Loss	7.01214e-11
1	94111714	94117422	5710	Loss	7.01214e-11
1	96325567	96330617	5052	Loss	7.01214e-11
1	94609892	94610187	297	Loss	7.01214e-11
1	72449303	72449938	637	Loss	7.34688e-11
1	72488476	72640978	152504	Loss	7.34688e-11
1	72965259	72965372	115	Loss	7.34688e-11
1	71793222	71796914	3694	Loss	7.34688e-11
1	74299989	74300004	17	Loss	7.34688e-11
1	74300017	74305601	5586	Loss	7.34688e-11
1	74648484	74664176	15694	Loss	7.34688e-11
1	71287710	71299153	11445	Loss	7.34688e-11
1	74524182	74531986	7806	Loss	7.34688e-11
1	71030479	71034474	3997	Loss	7.34688e-11
1	74532148	74535956	3810	Loss	7.34688e-11
1	85117365	85125918	8555	Loss	8.06495e-11
1	79960199	80021747	61550	Loss	8.06495e-11
1	73201996	73302555	100561	Loss	9.13008e-11
1	72871598	72875060	3464	Loss	9.13008e-11
1	71299154	71793221	494069	Loss	9.13008e-11
1	30774325	30777089	2766	Loss	9.13008e-11
1	71796915	71828032	31119	Loss	9.13008e-11
1	72829348	72871456	42110	Loss	9.13008e-11
1	71246669	71261771	15104	Loss	9.13008e-11
1	71049910	71244829	194921	Loss	9.13008e-11
1	71046779	71046894	117	Loss	9.13008e-11
1	30794414	30794569	157	Loss	9.13008e-11
1	71837379	71906033	68656	Loss	9.13008e-11
1	94614026	95177993	563969	Loss	9.72216e-11
1	96459253	96462706	3455	Loss	9.72216e-11
1	96359506	96359960	456	Loss	9.72216e-11
1	96462718	96470907	8191	Loss	9.72216e-11
1	96698659	96701717	3060	Loss	9.72216e-11
1	86906996	86906996	2	Loss	9.72216e-11
1	96354115	96359484	5371	Loss	9.72216e-11
1	94607608	94609245	1639	Loss	9.72216e-11
1	96704094	96706182	2090	Loss	9.72216e-11
1	97821081	97847306	26227	Loss	1.04979e-10
1	78832138	78834431	2295	Loss	1.06892e-10
1	78836314	78839349	3037	Loss	1.06892e-10
1	85974031	85979932	5903	Loss	1.06892e-10
1	69294732	69333693	38963	Loss	1.11282e-10
1	30382008	30382556	550	Loss	1.11282e-10
1	30384612	30384651	41	Loss	1.11282e-10
1	69114474	69289236	174764	Loss	1.11282e-10
1	70039905	70158638	118735	Loss	1.11282e-10
1	103330603	103339111	8510	Loss	1.14574e-10
1	104613622	104686677	73057	Loss	1.16346e-10
1	80644813	80662170	17359	Loss	1.33471e-10
1	84573915	84689945	116032	Loss	1.33471e-10
1	98720271	98841829	121560	Loss	1.48173e-10
1	98359201	98471224	112025	Loss	1.48173e-10
1	98666469	98689514	23047	Loss	1.48173e-10
1	101096056	101513451	417397	Loss	1.48173e-10
1	91544966	91554168	9204	Loss	1.48173e-10
1	94609246	94609891	647	Loss	1.48173e-10
1	63471492	63472103	613	Loss	1.54478e-10
1	43413653	43535790	122139	Loss	1.71568e-10
1	43543618	43827564	283948	Loss	1.71568e-10
1	41745771	42110780	365011	Loss	1.71568e-10
1	41654340	41744820	90482	Loss	1.71568e-10
1	43209539	43209566	29	Loss	1.71568e-10
1	41484318	41615357	131041	Loss	1.71568e-10
1	39504169	39871896	367729	Loss	1.71568e-10
1	42477791	42535994	58205	Loss	1.71568e-10
1	39902513	40035181	132670	Loss	1.71568e-10
1	40944460	41165078	220620	Loss	1.71568e-10
1	65326960	65353137	26179	Loss	1.74823e-10
1	65776276	65838365	62091	Loss	1.74823e-10
1	65390291	65729393	339104	Loss	1.74823e-10
1	65301611	65324188	22579	Loss	1.74823e-10
1	65289006	65299928	10924	Loss	1.74823e-10
1	33872593	33873971	1380	Loss	1.74823e-10
1	33691951	33697715	5766	Loss	1.74823e-10
1	64926546	65003469	76925	Loss	1.74823e-10
1	65353766	65390274	36510	Loss	1.74823e-10
1	64882022	64925890	43870	Loss	1.74823e-10
1	65078194	65286476	208284	Loss	1.74823e-10
1	67291256	67544233	252979	Loss	1.74823e-10
1	65746032	65746251	221	Loss	1.74823e-10
1	61785227	61785956	731	Loss	1.74823e-10
1	67142286	67142675	391	Loss	1.74823e-10
1	66144876	66253969	109095	Loss	1.74823e-10
1	67050620	67065687	15069	Loss	1.74823e-10
1	66130399	66139096	8699	Loss	1.74823e-10
1	66803548	66811879	8333	Loss	1.74823e-10
1	65745608	65745730	124	Loss	1.74823e-10
1	85070878	85117364	46488	Loss	1.81354e-10
1	85125919	85424596	298679	Loss	1.81354e-10
1	66462247	66463919	1674	Loss	1.91518e-10
1	34248064	34279741	31679	Loss	1.91518e-10
1	66474955	66477045	2092	Loss	1.91518e-10
1	58934243	58935331	1090	Loss	1.91518e-10
1	58936539	58937065	528	Loss	1.91518e-10
1	34247077	34247896	821	Loss	1.91518e-10
1	66928383	66974213	45832	Loss	1.91518e-10
1	34240070	34246792	6724	Loss	1.91518e-10
1	41398439	41459917	61480	Loss	1.93506e-10
1	39069437	39112312	42877	Loss	1.93506e-10
1	48673691	48673936	247	Loss	1.93506e-10
1	58372577	58453303	80728	Loss	2.0192e-10
1	35806565	35822318	15755	Loss	2.0192e-10
1	54020542	54026244	5704	Loss	2.0192e-10
1	58249598	58371041	121445	Loss	2.0192e-10
1	36196867	36242894	46029	Loss	2.03318e-10
1	35045587	35261231	215646	Loss	2.03318e-10
1	36015491	36190791	175302	Loss	2.03318e-10
1	35038296	35043034	4740	Loss	2.03318e-10
1	37450243	37450243	2	Loss	2.03318e-10
1	38844957	38845035	80	Loss	2.03318e-10
1	34573772	35031570	457800	Loss	2.03318e-10
1	37449595	37449595	2	Loss	2.03318e-10
1	38735871	38736874	1005	Loss	2.03318e-10
1	37335233	37335551	320	Loss	2.03318e-10
1	99129504	99148713	19211	Loss	2.07328e-10
1	99644210	99644223	15	Loss	2.07328e-10
1	100460212	100463370	3160	Loss	2.07328e-10
1	95177994	95330744	152752	Loss	2.07328e-10
1	99644953	99725472	80521	Loss	2.07328e-10
1	100664694	100671570	6878	Loss	2.07328e-10
1	99403198	99643963	240767	Loss	2.07328e-10
1	99183787	99265114	81329	Loss	2.07328e-10
1	94610188	94614025	3839	Loss	2.07328e-10
1	105219421	105219762	343	Loss	2.13362e-10
1	104990198	104990337	141	Loss	2.13362e-10
1	104882817	104989780	106965	Loss	2.13362e-10
1	104686678	104872329	185653	Loss	2.13362e-10
1	104992463	105153588	161127	Loss	2.13362e-10
1	72981089	72981626	539	Loss	2.29231e-10
1	71906034	72164145	258113	Loss	2.29231e-10
1	71046895	71049909	3016	Loss	2.29231e-10
1	72448799	72449302	505	Loss	2.29231e-10
1	72454898	72488475	33579	Loss	2.29231e-10
1	72965373	72980804	15433	Loss	2.29231e-10
1	73182302	73201995	19695	Loss	2.29231e-10
1	71034475	71046778	12305	Loss	2.29231e-10
1	71020004	71030478	10476	Loss	2.29231e-10
1	72875061	72965258	90199	Loss	2.29231e-10
1	72271265	72446164	174901	Loss	2.29231e-10
1	72983478	73097360	113884	Loss	2.29231e-10
1	72252576	72257304	4730	Loss	2.29231e-10
1	72871457	72871597	142	Loss	2.29231e-10
1	72170837	72244453	73618	Loss	2.29231e-10
1	73121501	73122261	762	Loss	2.29231e-10
1	103163838	103163844	8	Loss	2.74801e-10
1	103168188	103317669	149483	Loss	2.74801e-10
1	97847307	97851036	3731	Loss	2.74801e-10
1	103318243	103321719	3478	Loss	2.74801e-10
1	103339112	104005432	666322	Loss	2.74801e-10
1	103322341	103330602	8263	Loss	2.74801e-10
1	104603845	104613621	9778	Loss	3.16032e-10
1	69333694	69365094	31402	Loss	3.51438e-10
1	69368340	69841482	473144	Loss	3.51438e-10
1	69841504	70039904	198402	Loss	3.51438e-10
1	70158639	70253727	95090	Loss	3.51438e-10
1	69289237	69294731	5496	Loss	3.51438e-10
1	105830419	105830917	500	Loss	3.67623e-10
1	105831316	106149188	317874	Loss	3.67623e-10
1	105569514	105830336	260824	Loss	3.67623e-10
1	107624476	107636416	11942	Loss	3.67623e-10
1	102926470	102965684	39216	Loss	4.35536e-10
1	102204811	102925553	720744	Loss	4.35536e-10
1	101992508	102175451	182945	Loss	4.35536e-10
1	101513452	101992471	479021	Loss	4.35536e-10
1	100372055	100372070	17	Loss	4.35536e-10
1	98690215	98720270	30057	Loss	4.35536e-10
1	98471225	98666468	195245	Loss	4.35536e-10
1	98358094	98359200	1108	Loss	4.35536e-10
1	97851037	97871774	20739	Loss	4.69301e-10
1	64388443	64389549	1108	Loss	4.95929e-10
1	64925891	64926545	656	Loss	4.95929e-10
1	65353138	65353765	629	Loss	4.95929e-10
1	61861554	61861751	199	Loss	4.95929e-10
1	65390275	65390290	17	Loss	4.95929e-10
1	73122262	73182301	60041	Loss	5.50492e-10
1	73097361	73098688	1329	Loss	5.50492e-10
1	72257305	72271264	13961	Loss	5.50492e-10
1	73098886	73121500	22616	Loss	5.50492e-10
1	62372301	62517305	145006	Loss	5.66964e-10
1	63472868	63907208	434342	Loss	5.66964e-10
1	64368536	64371536	3002	Loss	5.66964e-10
1	64401532	64401946	416	Loss	5.66964e-10
1	64493167	64882021	388856	Loss	5.66964e-10
1	34279742	34337704	57964	Loss	5.66964e-10
1	65286477	65289005	2530	Loss	5.66964e-10
1	65299929	65301610	1683	Loss	5.66964e-10
1	67065688	67142285	76599	Loss	5.66964e-10
1	62340851	62351892	11043	Loss	5.66964e-10
1	61585673	61785226	199555	Loss	5.66964e-10
1	62317933	62339679	21748	Loss	5.66964e-10
1	67142676	67291255	148581	Loss	5.66964e-10
1	58937066	58953848	16784	Loss	5.66964e-10
1	61861752	61877445	15695	Loss	5.66964e-10
1	61785957	61861553	75598	Loss	5.66964e-10
1	58819815	58934242	114429	Loss	5.66964e-10
1	66811880	66928382	116504	Loss	5.66964e-10
1	66974214	67050619	76407	Loss	5.66964e-10
1	58935332	58936538	1208	Loss	5.66964e-10
1	107587027	107624475	37450	Loss	5.76991e-10
1	106743483	107331490	588009	Loss	5.76991e-10
1	107636417	107749779	113364	Loss	5.76991e-10
1	106149189	106742200	593013	Loss	5.76991e-10
1	40750083	40944459	194378	Loss	6.01484e-10
1	42535995	42557010	21017	Loss	6.01484e-10
1	42559403	43209538	650137	Loss	6.01484e-10
1	43209567	43347078	137513	Loss	6.01484e-10
1	46359580	47205123	845545	Loss	6.01484e-10
1	43350189	43357599	7412	Loss	6.01484e-10
1	43357979	43413652	55675	Loss	6.01484e-10
1	43827565	43839889	12326	Loss	6.01484e-10
1	47236390	47776819	540431	Loss	6.01484e-10
1	47955503	48284764	329263	Loss	6.01484e-10
1	45532667	45652240	119575	Loss	6.01484e-10
1	43879228	44029352	150126	Loss	6.01484e-10
1	99643964	99644209	247	Loss	6.01876e-10
1	99644224	99644952	730	Loss	6.01876e-10
1	105219763	105261529	41768	Loss	6.04982e-10
1	105219420	105219420	2	Loss	6.04982e-10
1	105153589	105211263	57676	Loss	6.04982e-10
1	105211276	105214899	3625	Loss	6.04982e-10
1	104872330	104882816	10488	Loss	6.04982e-10
1	105262283	105568147	305866	Loss	6.04982e-10
1	55301808	55303438	1632	Loss	6.28381e-10
1	56740071	56943673	203604	Loss	6.28381e-10
1	56946408	57208709	262303	Loss	6.28381e-10
1	34369246	34390606	21362	Loss	6.28381e-10
1	57211204	57211399	197	Loss	6.28381e-10
1	57211976	57456842	244868	Loss	6.28381e-10
1	62843231	63401523	558294	Loss	6.28381e-10
1	57457397	58249597	792202	Loss	6.28381e-10
1	58371042	58372576	1536	Loss	6.28381e-10
1	58631193	58755456	124265	Loss	6.28381e-10
1	58453304	58631126	177824	Loss	6.28381e-10
1	42439759	42477790	38033	Loss	6.64889e-10
1	48323803	48326287	2486	Loss	6.64889e-10
1	48670415	48673690	3277	Loss	6.64889e-10
1	48673937	48702495	28560	Loss	6.64889e-10
1	50732381	50897959	165580	Loss	6.64889e-10
1	42110781	42152483	41704	Loss	6.64889e-10
1	42200849	42306387	105540	Loss	6.64889e-10
1	39112313	39504168	391857	Loss	6.64889e-10
1	40035182	40531094	495914	Loss	6.64889e-10
1	41744821	41745770	951	Loss	6.64889e-10
1	41615358	41654339	38983	Loss	6.64889e-10
1	41165079	41398438	233361	Loss	6.64889e-10
1	49292234	49357901	65669	Loss	6.64889e-10
1	40531842	40531857	17	Loss	6.64889e-10
1	49639094	49884098	245006	Loss	6.64889e-10
1	34481073	34573771	92700	Loss	6.71408e-10
1	52277587	52346065	68480	Loss	6.71408e-10
1	52348349	52348769	422	Loss	6.71408e-10
1	52348853	52553419	204568	Loss	6.71408e-10
1	54614410	55012358	397950	Loss	6.71408e-10
1	54610299	54614144	3847	Loss	6.71408e-10
1	54241974	54382383	140411	Loss	6.71408e-10
1	54105636	54108211	2577	Loss	6.71408e-10
1	54026245	54077882	51639	Loss	6.71408e-10
1	52556512	52928194	371684	Loss	6.71408e-10
1	53851855	54020541	168688	Loss	6.71408e-10
1	53625450	53851164	225716	Loss	6.71408e-10
1	53561304	53620295	58993	Loss	6.71408e-10
1	53489741	53559846	70107	Loss	6.71408e-10
1	52988761	53489043	500284	Loss	6.71408e-10
1	37687419	37762538	75121	Loss	6.8647e-10
1	37455658	37635503	179847	Loss	6.8647e-10
1	38845036	39069436	224402	Loss	6.8647e-10
1	37766679	38290680	524003	Loss	6.8647e-10
1	37449596	37450242	648	Loss	6.8647e-10
1	51477089	52264063	786976	Loss	6.8647e-10
1	50093535	50096928	3395	Loss	6.8647e-10
1	35031571	35038295	6726	Loss	6.8647e-10
1	35043035	35045586	2553	Loss	6.8647e-10
1	38736875	38844956	108083	Loss	6.8647e-10
1	36190792	36196866	6076	Loss	6.8647e-10
1	36242895	36399781	156888	Loss	6.8647e-10
1	37450244	37454784	4542	Loss	6.8647e-10
1	36462441	36867234	404795	Loss	6.8647e-10
1	36874242	36909384	35144	Loss	6.8647e-10
1	36914068	37329530	415464	Loss	6.8647e-10
1	38294637	38735870	441235	Loss	6.8647e-10
1	37329900	37331908	2010	Loss	6.8647e-10
1	37332937	37335232	2297	Loss	6.8647e-10
1	37335552	37449594	114044	Loss	6.8647e-10
1	104005433	104343986	338555	Loss	7.01637e-10
1	102175452	102204810	29360	Loss	7.01637e-10
1	103321720	103322340	622	Loss	7.01637e-10
1	103317670	103318242	574	Loss	7.01637e-10
1	103163845	103168187	4344	Loss	7.01637e-10
1	102965685	103163837	198154	Loss	7.01637e-10
1	102925554	102926289	737	Loss	7.01637e-10
1	101992472	101992507	37	Loss	7.01637e-10
1	98340293	98358093	17802	Loss	7.01637e-10
1	70993264	70994201	939	Loss	7.02793e-10
1	72449939	72454897	4960	Loss	7.02793e-10
1	71002192	71002687	497	Loss	7.02793e-10
1	71002746	71020003	17259	Loss	7.02793e-10
1	70926472	70927078	608	Loss	7.02793e-10
1	72981627	72983477	1852	Loss	7.02793e-10
1	72164146	72170836	6692	Loss	7.02793e-10
1	72980805	72981088	285	Loss	7.02793e-10
1	72244454	72252575	8123	Loss	7.02793e-10
1	72446165	72448798	2635	Loss	7.02793e-10
1	100463371	100664693	201324	Loss	7.11521e-10
1	100671571	101096055	424486	Loss	7.11521e-10
1	98841830	99129503	287675	Loss	7.11521e-10
1	100155849	100372054	216207	Loss	7.11521e-10
1	99865616	100132031	266417	Loss	7.11521e-10
1	100372071	100460211	88142	Loss	7.11521e-10
1	99725473	99864506	139035	Loss	7.11521e-10
1	104381295	104603844	222551	Loss	8.64242e-10
1	97871775	97887134	15361	Loss	8.64242e-10
1	69841483	69841503	22	Loss	8.83211e-10
1	70253728	70831840	578114	Loss	8.83211e-10
1	70833645	70883844	50201	Loss	8.83211e-10
1	70884563	70896032	11471	Loss	8.83211e-10
1	70896627	70896890	265	Loss	8.83211e-10
1	105261530	105262282	754	Loss	8.94467e-10
1	105568148	105569513	1367	Loss	8.94467e-10
1	105830337	105830418	83	Loss	8.94467e-10
1	105830918	105831315	399	Loss	8.94467e-10
1	108896373	109022116	125745	Loss	9.92643e-10
1	111105058	111106575	1519	Loss	9.92643e-10
1	107749780	107842708	92930	Loss	9.92643e-10
1	104989781	104990197	418	Loss	1.0212e-09
1	104990338	104992462	2126	Loss	1.0212e-09
1	105211264	105211275	13	Loss	1.0212e-09
1	109612458	109934691	322235	Loss	1.04979e-09
1	99864507	99865615	1110	Loss	1.06204e-09
1	100132032	100148202	16172	Loss	1.06204e-09
1	100148869	100155848	6981	Loss	1.06204e-09
1	102926290	102926469	181	Loss	1.06204e-09
1	69365095	69368339	3246	Loss	1.09077e-09
1	98092475	98145877	53404	Loss	1.26334e-09
1	98195468	98220682	25216	Loss	1.26334e-09
1	97971585	97973101	1518	Loss	1.26334e-09
1	98322380	98340292	17914	Loss	1.26334e-09
1	104343987	104349517	5532	Loss	1.26334e-09
1	98689515	98690214	701	Loss	1.26334e-09
1	98010718	98060204	49488	Loss	1.26334e-09
1	71244830	71246668	1840	Loss	1.26889e-09
1	105214900	105219419	4521	Loss	1.40425e-09
1	107879849	107891917	12070	Loss	1.49645e-09
1	107331491	107345135	13646	Loss	1.49645e-09
1	107892366	107895075	2711	Loss	1.49645e-09
1	107345164	107350511	5349	Loss	1.49645e-09
1	107350931	107376058	25129	Loss	1.49645e-09
1	107376512	107403027	26517	Loss	1.49645e-09
1	107403070	107587026	183958	Loss	1.49645e-09
1	64099265	64344018	244755	Loss	1.56514e-09
1	64346362	64368535	22175	Loss	1.56514e-09
1	64371537	64377527	5992	Loss	1.56514e-09
1	64381918	64388442	6526	Loss	1.56514e-09
1	64389550	64401531	11983	Loss	1.56514e-09
1	64401947	64493166	91221	Loss	1.56514e-09
1	63993118	64017829	24713	Loss	1.56514e-09
1	61355967	61356057	92	Loss	1.56514e-09
1	63907209	63951242	44035	Loss	1.56514e-09
1	62303860	62317932	14074	Loss	1.56514e-09
1	62339680	62340850	1172	Loss	1.56514e-09
1	62351893	62372300	20409	Loss	1.56514e-09
1	70994202	70999657	5457	Loss	1.64992e-09
1	58755457	58819814	64359	Loss	1.80791e-09
1	60857551	61355966	498417	Loss	1.80791e-09
1	60681481	60854242	172763	Loss	1.80791e-09
1	60593304	60678455	85153	Loss	1.80791e-09
1	63472104	63472867	765	Loss	1.80791e-09
1	55303439	55303782	345	Loss	1.80791e-09
1	63401524	63471491	69969	Loss	1.80791e-09
1	60460277	60575324	115049	Loss	1.80791e-09
1	62517306	62843230	325926	Loss	1.80791e-09
1	61356058	61384096	28040	Loss	1.80791e-09
1	34337705	34369245	31542	Loss	1.80791e-09
1	59983732	60460254	476524	Loss	1.80791e-09
1	58953849	59983688	1029841	Loss	1.80791e-09
1	61384523	61585672	201151	Loss	1.80791e-09
1	58631127	58631192	67	Loss	1.80791e-09
1	61877446	62186723	309279	Loss	1.80791e-09
1	57456843	57457396	555	Loss	1.80791e-09
1	60855214	60857355	2143	Loss	1.80791e-09
1	56133469	56616830	483363	Loss	2.02771e-09
1	36872665	36872763	100	Loss	2.02771e-09
1	55012359	55195919	183562	Loss	2.02771e-09
1	34390607	34481072	90467	Loss	2.02771e-09
1	54108212	54108212	2	Loss	2.02771e-09
1	55196100	55301807	105709	Loss	2.02771e-09
1	55305417	55330629	25214	Loss	2.02771e-09
1	57211400	57211975	577	Loss	2.02771e-09
1	55330967	55495743	164778	Loss	2.02771e-09
1	55496177	55537197	41022	Loss	2.02771e-09
1	57208710	57211203	2495	Loss	2.02771e-09
1	53851165	53851854	691	Loss	2.02771e-09
1	55537282	55792721	255441	Loss	2.02771e-09
1	53620296	53625449	5155	Loss	2.02771e-09
1	55793373	56129365	335994	Loss	2.02771e-09
1	54614145	54614409	266	Loss	2.02771e-09
1	52553420	52556511	3093	Loss	2.02771e-09
1	52928195	52988760	60567	Loss	2.02771e-09
1	53559847	53561303	1458	Loss	2.02771e-09
1	56616961	56617278	319	Loss	2.02771e-09
1	53489044	53489740	698	Loss	2.02771e-09
1	56619091	56638781	19692	Loss	2.02771e-09
1	56639951	56740070	100121	Loss	2.02771e-09
1	56943674	56946407	2735	Loss	2.02771e-09
1	71002688	71002745	59	Loss	2.1165e-09
1	70927079	70990985	63908	Loss	2.1165e-09
1	70896891	70926471	29582	Loss	2.1165e-09
1	70999658	71002191	2535	Loss	2.1165e-09
1	70831841	70833644	1805	Loss	2.1165e-09
1	70896033	70896626	595	Loss	2.1165e-09
1	70883845	70884562	719	Loss	2.1165e-09
1	50989616	51054321	64707	Loss	2.19632e-09
1	36399782	36462440	62660	Loss	2.19632e-09
1	36909385	36914067	4684	Loss	2.19632e-09
1	54382384	54610298	227916	Loss	2.19632e-09
1	54119005	54241973	122970	Loss	2.19632e-09
1	54077883	54105635	27754	Loss	2.19632e-09
1	52348770	52348852	84	Loss	2.19632e-09
1	52346066	52348348	2284	Loss	2.19632e-09
1	52264064	52277586	13524	Loss	2.19632e-09
1	51468755	51477088	8335	Loss	2.19632e-09
1	51054347	51086336	31991	Loss	2.19632e-09
1	38290681	38294636	3957	Loss	2.19632e-09
1	37762539	37766678	4141	Loss	2.19632e-09
1	37679990	37687418	7430	Loss	2.19632e-09
1	49357902	49639093	281193	Loss	2.2495e-09
1	49288406	49292233	3829	Loss	2.2495e-09
1	48536799	48670414	133617	Loss	2.2495e-09
1	48451990	48535933	83945	Loss	2.2495e-09
1	48326288	48403888	77602	Loss	2.2495e-09
1	48284765	48323802	39039	Loss	2.2495e-09
1	47916918	47955502	38586	Loss	2.2495e-09
1	47806656	47907778	101124	Loss	2.2495e-09
1	47776820	47796299	19481	Loss	2.2495e-09
1	47205124	47236389	31267	Loss	2.2495e-09
1	46132337	46359579	227244	Loss	2.2495e-09
1	46035471	46077917	42448	Loss	2.2495e-09
1	46021631	46035455	13826	Loss	2.2495e-09
1	45665694	46021555	355863	Loss	2.2495e-09
1	45652241	45665579	13340	Loss	2.2495e-09
1	45289888	45532666	242780	Loss	2.2495e-09
1	45010811	45289217	278408	Loss	2.2495e-09
1	44343963	45010744	666783	Loss	2.2495e-09
1	44029353	44105169	75818	Loss	2.2495e-09
1	43839890	43879227	39339	Loss	2.2495e-09
1	43357600	43357978	380	Loss	2.2495e-09
1	43347079	43350188	3111	Loss	2.2495e-09
1	42557011	42559402	2393	Loss	2.2495e-09
1	40531858	40750082	218226	Loss	2.2495e-09
1	40531095	40531841	748	Loss	2.2495e-09
1	42152484	42200848	48366	Loss	2.28106e-09
1	49884099	50001989	117892	Loss	2.28106e-09
1	42306388	42353694	47308	Loss	2.28106e-09
1	37329531	37329899	370	Loss	2.28106e-09
1	36867235	36872664	5431	Loss	2.28106e-09
1	50897960	50951642	53684	Loss	2.28106e-09
1	50617551	50732380	114831	Loss	2.28106e-09
1	42354234	42439758	85526	Loss	2.28106e-09
1	50096929	50615515	518588	Loss	2.28106e-09
1	36873319	36874241	924	Loss	2.28106e-09
1	37331909	37332936	1029	Loss	2.28106e-09
1	37454785	37455657	874	Loss	2.28106e-09
1	50063179	50093534	30357	Loss	2.28106e-09
1	48702496	48725295	22801	Loss	2.28106e-09
1	106742201	106743482	1283	Loss	2.32436e-09
1	111104734	111105057	325	Loss	2.32436e-09
1	109022117	109612457	590342	Loss	2.32436e-09
1	109934692	110921714	987024	Loss	2.32436e-09
1	111102971	111103687	718	Loss	2.32436e-09
1	73098689	73098885	198	Loss	2.81594e-09
1	111314569	111315241	674	Loss	3.5101e-09
1	111106576	111313016	206442	Loss	3.5101e-09
1	111103688	111104733	1047	Loss	3.5101e-09
1	110921715	111102970	181257	Loss	3.5101e-09
1	97887135	97971584	84451	Loss	3.66845e-09
1	97973102	98010717	37617	Loss	3.66845e-09
1	98060205	98088937	28734	Loss	3.66845e-09
1	98089788	98092474	2688	Loss	3.66845e-09
1	98145878	98195467	49591	Loss	3.66845e-09
1	104349518	104381294	31778	Loss	3.66845e-09
1	98220683	98229590	8909	Loss	3.66845e-09
1	98287282	98322379	35099	Loss	3.66845e-09
1	107855181	107879848	24669	Loss	3.8012e-09
1	107842709	107855012	12305	Loss	3.8012e-09
1	107403028	107403069	43	Loss	3.8012e-09
1	107376059	107376511	454	Loss	3.8012e-09
1	107891918	107892365	449	Loss	3.8012e-09
1	107895076	108090428	195354	Loss	3.8012e-09
1	108889774	108896372	6600	Loss	3.8012e-09
1	108090642	108511403	420763	Loss	3.8012e-09
1	108515547	108518870	3325	Loss	3.8012e-09
1	108531897	108711267	179372	Loss	3.8012e-09
1	63951243	63990195	38954	Loss	4.05997e-09
1	62289073	62303859	14788	Loss	4.05997e-09
1	64017830	64099264	81436	Loss	4.05997e-09
1	64377528	64381917	4391	Loss	4.05997e-09
1	64344019	64346361	2344	Loss	4.05997e-09
1	60460255	60460276	23	Loss	4.85387e-09
1	60575325	60593303	17980	Loss	4.85387e-09
1	60678456	60681480	3026	Loss	4.85387e-09
1	61384097	61384522	427	Loss	4.85387e-09
1	62186724	62268504	81782	Loss	4.85387e-09
1	98229591	98287281	57692	Loss	5.27861e-09
1	108711268	108889773	178507	Loss	5.45436e-09
1	108090429	108090641	214	Loss	5.45436e-09
1	107855013	107855180	169	Loss	5.45436e-09
1	36872764	36873318	556	Loss	5.66596e-09
1	55537198	55537281	85	Loss	5.66596e-09
1	60854243	60855213	972	Loss	5.66596e-09
1	55195920	55196099	181	Loss	5.66596e-09
1	55303783	55305416	1635	Loss	5.66596e-09
1	55330630	55330966	338	Loss	5.66596e-09
1	55496040	55496176	138	Loss	5.66596e-09
1	60857356	60857550	196	Loss	5.66596e-09
1	55792722	55793372	652	Loss	5.66596e-09
1	56129366	56133468	4104	Loss	5.66596e-09
1	56638782	56639950	1170	Loss	5.66596e-09
1	70990986	70993263	2279	Loss	6.25875e-09
1	107345136	107345163	29	Loss	6.34e-09
1	107350512	107350930	420	Loss	6.34e-09
1	56617279	56619090	1813	Loss	6.43219e-09
1	37635504	37679989	44487	Loss	6.43219e-09
1	56616831	56616960	131	Loss	6.43219e-09
1	51054322	51054346	26	Loss	6.43219e-09
1	51086337	51233372	147037	Loss	6.43219e-09
1	51383696	51413204	29510	Loss	6.43219e-09
1	51439648	51468754	29108	Loss	6.43219e-09
1	54108213	54119004	10793	Loss	6.43219e-09
1	50615516	50617550	2036	Loss	7.06482e-09
1	50951643	50989615	37974	Loss	7.06482e-09
1	42353695	42354233	540	Loss	7.06482e-09
1	50001990	50063178	61190	Loss	7.06482e-09
1	48725296	48802392	77098	Loss	7.06482e-09
1	45665580	45665693	115	Loss	7.45606e-09
1	48819997	49131071	311076	Loss	7.45606e-09
1	46077918	46098776	20860	Loss	7.45606e-09
1	48535934	48536798	866	Loss	7.45606e-09
1	48403889	48451989	48102	Loss	7.45606e-09
1	47907779	47916917	9140	Loss	7.45606e-09
1	47796300	47806655	10357	Loss	7.45606e-09
1	46131771	46132336	567	Loss	7.45606e-09
1	44105170	44343962	238794	Loss	7.45606e-09
1	45010745	45010810	67	Loss	7.45606e-09
1	45289218	45289887	671	Loss	7.45606e-09
1	46021556	46021630	76	Loss	7.45606e-09
1	46035456	46035470	16	Loss	7.45606e-09
1	46104625	46129052	24429	Loss	7.45606e-09
1	49156475	49288405	131932	Loss	7.49017e-09
1	98088938	98089787	851	Loss	8.22405e-09
1	108511404	108515546	4144	Loss	8.56067e-09
1	108518871	108531896	13027	Loss	8.56067e-09
1	111313017	111314568	1553	Loss	8.70752e-09
1	111315242	111546530	231290	Loss	8.70752e-09
1	63990196	63993117	2923	Loss	9.95908e-09
1	111686899	111748127	61230	Loss	1.20815e-08
1	59983689	59983731	44	Loss	1.22535e-08
1	62268505	62289072	20569	Loss	1.22535e-08
1	100148203	100148868	667	Loss	1.29226e-08
1	55495744	55496039	297	Loss	1.4785e-08
1	51413205	51439647	26444	Loss	1.74434e-08
1	111748128	111812708	64582	Loss	1.80544e-08
1	111814476	111891169	76695	Loss	1.80544e-08
1	111937703	111999997	62296	Loss	1.80544e-08
1	111546531	111591508	44979	Loss	1.93705e-08
1	51233373	51383695	150324	Loss	2.00475e-08
1	48802393	48819996	17605	Loss	2.23342e-08
1	46098777	46104624	5849	Loss	2.39609e-08
1	49131072	49156474	25404	Loss	2.39609e-08
1	46129053	46131770	2719	Loss	2.39609e-08
1	111591509	111686898	95391	Loss	2.7827e-08
1	111891170	111937702	46534	Loss	4.00106e-08
1	112357731	112360457	2728	Loss	4.00106e-08
1	112357102	112357143	43	Loss	4.00106e-08
1	111812709	111814475	1768	Loss	4.00106e-08
1	112119066	112174904	55840	Loss	4.00106e-08
1	111999998	112115071	115075	Loss	4.00106e-08
1	112565240	112567671	2433	Loss	4.00106e-08
1	112562802	112563292	492	Loss	4.00106e-08
1	112115072	112119065	3995	Loss	5.44949e-08
1	112357144	112357730	588	Loss	5.44949e-08
1	112360458	112546598	186142	Loss	5.44949e-08
1	112547225	112562801	15578	Loss	5.44949e-08
1	112563293	112565239	1948	Loss	5.44949e-08
1	112567672	112651427	83757	Loss	5.44949e-08
1	112174905	112357101	182198	Loss	5.44949e-08
1	112927805	112927912	109	Loss	7.62002e-08
1	113054937	113054972	37	Loss	1.25648e-07
1	112789702	112816210	26510	Loss	1.25648e-07
1	112788187	112788376	191	Loss	1.25648e-07
1	112651428	112788110	136684	Loss	1.25648e-07
1	112546599	112547224	627	Loss	1.25648e-07
1	113192209	113437110	244903	Loss	1.57548e-07
1	113055023	113063426	8405	Loss	1.57548e-07
1	113054973	113054973	2	Loss	1.57548e-07
1	113052186	113054936	2752	Loss	1.57548e-07
1	113046395	113049923	3530	Loss	1.57548e-07
1	112927913	113040441	112530	Loss	1.57548e-07
1	112816211	112927804	111595	Loss	1.57548e-07
1	113063473	113185899	122428	Loss	1.57548e-07
1	113448853	113600116	151265	Loss	2.19759e-07
1	113836443	113856611	20170	Loss	2.19759e-07
1	113600201	113790246	190047	Loss	2.19759e-07
1	113444110	113446859	2751	Loss	2.22894e-07
1	112788111	112788186	77	Loss	2.50318e-07
1	112788377	112789701	1326	Loss	2.50318e-07
1	113446860	113446860	2	Loss	2.73064e-07
1	113185900	113192208	6310	Loss	3.37419e-07
1	113040442	113046394	5954	Loss	3.37419e-07
1	113054974	113055022	50	Loss	3.37419e-07
1	113063427	113063472	47	Loss	3.37419e-07
1	113600117	113600200	85	Loss	4.34137e-07
1	113790247	113836442	46197	Loss	4.34137e-07
1	113856612	114045966	189356	Loss	4.34137e-07
1	114053546	114244177	190633	Loss	4.34137e-07
1	113049924	113052185	2263	Loss	5.20422e-07
1	114045967	114053545	7580	Loss	5.7053e-07
1	114992254	115006966	14714	Loss	8.81099e-07
1	114764539	114980629	216092	Loss	8.81099e-07
1	114412650	114412666	18	Loss	8.81099e-07
1	114244178	114361304	117128	Loss	8.81099e-07
1	113437111	113444109	7000	Loss	1.12317e-06
1	113446861	113448852	1993	Loss	1.36767e-06
1	114980630	114986571	5943	Loss	1.82515e-06
1	114697033	114764538	67507	Loss	1.82515e-06
1	114694272	114697020	2750	Loss	1.82515e-06
1	114412667	114691381	278716	Loss	1.82515e-06
1	114361305	114412649	51346	Loss	1.82515e-06
1	115009728	115124160	114434	Loss	1.82515e-06
1	115124161	115136771	12612	Loss	2.19588e-06
1	115006967	115009727	2762	Loss	2.95134e-06
1	114986572	114992253	5683	Loss	2.95134e-06
1	115626251	115626284	35	Loss	3.41795e-06
1	114691382	114694271	2891	Loss	3.41795e-06
1	114697021	114697032	13	Loss	3.41795e-06
1	115626285	115773162	146879	Loss	4.36418e-06
1	115839680	115841030	1352	Loss	4.36418e-06
1	115136772	115266305	129535	Loss	4.36418e-06
1	115529957	115626250	96295	Loss	4.36418e-06
1	118327386	118333164	5780	Loss	5.34971e-06
1	118868405	118869556	1153	Loss	5.34971e-06
1	120523903	120523954	53	Loss	6.40678e-06
1	116257406	116859356	601952	Loss	6.61555e-06
1	115785378	115786407	1031	Loss	6.61555e-06
1	116002051	116005527	3478	Loss	6.61555e-06
1	115266306	115270003	3699	Loss	8.11717e-06
1	118432939	118525533	92596	Loss	8.42303e-06
1	117927338	117927443	107	Loss	8.42303e-06
1	120523955	120523955	2	Loss	8.90221e-06
1	117927444	117927981	539	Loss	1.00664e-05
1	117898930	117927337	28409	Loss	1.00664e-05
1	118293093	118327385	34294	Loss	1.00664e-05
1	118333165	118432938	99775	Loss	1.00664e-05
1	118525534	118567907	42375	Loss	1.00664e-05
1	118699723	118868404	168683	Loss	1.00664e-05
1	118869557	119059375	189820	Loss	1.00664e-05
1	116895144	116896059	917	Loss	1.00664e-05
1	117264107	117264160	55	Loss	1.00664e-05
1	117340180	117526934	186756	Loss	1.00664e-05
1	117266680	117268039	1361	Loss	1.00664e-05
1	117284266	117339801	55537	Loss	1.00664e-05
1	116002050	116002050	2	Loss	1.26803e-05
1	115459257	115529956	70701	Loss	1.26803e-05
1	115773163	115785377	12216	Loss	1.26803e-05
1	115786408	115839679	53273	Loss	1.26803e-05
1	115841031	116001984	160955	Loss	1.26803e-05
1	116005528	116011901	6375	Loss	1.26803e-05
1	116012072	116257405	245335	Loss	1.26803e-05
1	120522602	120523902	1302	Loss	1.41203e-05
1	115270004	115459256	189254	Loss	1.50727e-05
1	117716277	117718732	2457	Loss	1.53869e-05
1	117738816	117739293	479	Loss	1.53869e-05
1	117727368	117728491	1125	Loss	1.53869e-05
1	117722167	117722179	14	Loss	1.53869e-05
1	117718780	117718796	18	Loss	1.53869e-05
1	117526935	117716276	189343	Loss	1.93856e-05
1	119059376	119287173	227799	Loss	1.93856e-05
1	117718733	117718779	48	Loss	1.93856e-05
1	117728492	117738815	10325	Loss	1.93856e-05
1	118224211	118293092	68883	Loss	1.93856e-05
1	120361149	120361340	193	Loss	1.93856e-05
1	120338609	120343111	4504	Loss	1.93856e-05
1	117739294	117898929	159637	Loss	1.93856e-05
1	120331633	120333200	1569	Loss	1.93856e-05
1	117927982	118017633	89653	Loss	1.93856e-05
1	119362732	119562381	199651	Loss	1.93856e-05
1	117718797	117722166	3371	Loss	1.93856e-05
1	118133769	118223983	90216	Loss	1.93856e-05
1	117722180	117727367	5189	Loss	1.93856e-05
1	120523956	120527360	3406	Loss	1.97091e-05
1	119909422	119909848	428	Loss	1.98952e-05
1	119909850	119910078	230	Loss	1.98952e-05
1	119647947	119909207	261262	Loss	1.98952e-05
1	119913685	119913823	140	Loss	1.98952e-05
1	120210441	120214823	4384	Loss	1.98952e-05
1	120214874	120224972	10100	Loss	1.98952e-05
1	117339802	117340179	379	Loss	1.98952e-05
1	117264161	117266679	2520	Loss	1.98952e-05
1	117228527	117264106	35581	Loss	1.98952e-05
1	117044231	117225141	180912	Loss	1.98952e-05
1	117021238	117043043	21807	Loss	1.98952e-05
1	117268040	117284265	16227	Loss	1.98952e-05
1	116896060	117021187	125129	Loss	1.98952e-05
1	119317344	119320405	3063	Loss	1.98952e-05
1	116859357	116895143	35788	Loss	1.98952e-05
1	118567908	118699722	131816	Loss	1.98952e-05
1	119910079	119913684	3607	Loss	2.28989e-05
1	119913824	119935060	21238	Loss	2.28989e-05
1	119936062	119975078	39018	Loss	2.28989e-05
1	119909849	119909849	2	Loss	2.28989e-05
1	116001985	116002049	66	Loss	2.28989e-05
1	116011902	116012071	171	Loss	2.28989e-05
1	120156052	120210440	54390	Loss	2.28989e-05
1	117021188	117021237	51	Loss	2.28989e-05
1	120214824	120214873	51	Loss	2.28989e-05
1	119627125	119647946	20823	Loss	2.28989e-05
1	119909208	119909421	215	Loss	2.28989e-05
1	117043044	117044230	1188	Loss	2.28989e-05
1	120527361	120527361	2	Loss	2.76601e-05
1	120361341	120422704	61365	Loss	3.49151e-05
1	120343112	120361148	18038	Loss	3.49151e-05
1	120333201	120338608	5409	Loss	3.49151e-05
1	120224973	120331632	106661	Loss	3.49151e-05
1	119562382	119610182	47802	Loss	3.49151e-05
1	119320406	119362731	42327	Loss	3.49151e-05
1	119287174	119317343	30171	Loss	3.49151e-05
1	118223984	118224210	228	Loss	3.49151e-05
1	118123979	118133768	9791	Loss	3.49151e-05
1	118017634	118123781	106149	Loss	3.49151e-05
1	117225142	117228526	3386	Loss	3.49151e-05
1	119610183	119627124	16943	Loss	4.23747e-05
1	120422705	120425619	2916	Loss	4.23747e-05
1	120425804	120485749	59947	Loss	4.23747e-05
1	118123782	118123978	198	Loss	4.23747e-05
1	119975079	120156051	180974	Loss	4.43941e-05
1	119935061	119936061	1002	Loss	4.43941e-05
1	120425620	120425803	185	Loss	7.52596e-05
1	120485750	120511866	26118	Loss	7.52596e-05
1	120521761	120522601	842	Loss	9.7991e-05
1	120521654	120521760	108	Loss	0.000114408
1	120511867	120517946	6081	Loss	0.000131067
1	120520715	120521653	940	Loss	0.000131067
1	120517947	120520714	2769	Loss	0.000231944
2	102650508	102654227	3721	Gain	1.60316e-07
2	101138558	101139604	1048	Gain	3.33484e-07
2	100110853	100425448	314597	Gain	3.33484e-07
2	102170023	102496883	326862	Gain	3.33484e-07
2	102499277	102506298	7023	Gain	3.33484e-07
2	102508430	102650507	142079	Gain	3.33484e-07
2	102654228	102722402	68176	Gain	3.33484e-07
2	113498337	113515649	17314	Gain	4.36561e-07
2	113475494	113493765	18273	Gain	4.36561e-07
2	112583824	112612627	28805	Gain	5.65765e-07
2	112530683	112560496	29815	Gain	5.65765e-07
2	100015532	100110852	95322	Gain	9.69956e-07
2	107219109	107448631	229524	Gain	9.69956e-07
2	112612628	112767405	154779	Gain	1.16437e-06
2	113493766	113498336	4572	Gain	1.16437e-06
2	113111870	113475493	363625	Gain	1.16437e-06
2	112498712	112530682	31972	Gain	1.16437e-06
2	101178351	101200965	22616	Gain	1.50911e-06
2	100686173	101138557	452386	Gain	1.50911e-06
2	100598335	100676622	78289	Gain	1.50911e-06
2	100425449	100584668	159221	Gain	1.50911e-06
2	101139605	101164813	25210	Gain	1.50911e-06
2	113753583	114148961	395380	Gain	1.50911e-06
2	113515650	113753124	237476	Gain	1.50911e-06
2	102506299	102508429	2132	Gain	1.50911e-06
2	102722403	102839382	116981	Gain	1.50911e-06
2	101484534	102170022	685490	Gain	1.50911e-06
2	107688751	107691550	2801	Gain	1.50911e-06
2	112478124	112498711	20589	Gain	1.50911e-06
2	102496884	102499276	2394	Gain	1.50911e-06
2	99500714	99827733	327021	Gain	1.50911e-06
2	112560497	112583823	23328	Gain	1.51724e-06
2	107691551	107931509	239960	Gain	2.16404e-06
2	107448632	107688750	240120	Gain	2.16404e-06
2	107133098	107219108	86012	Gain	2.16404e-06
2	107040337	107129449	89114	Gain	2.16404e-06
2	99937731	100015531	77802	Gain	2.16404e-06
2	109644873	109655542	10671	Gain	2.16404e-06
2	99472127	99500713	28588	Gain	2.16404e-06
2	106535569	106546748	11181	Gain	2.16404e-06
2	115776126	115823715	47591	Gain	2.16404e-06
2	106511846	106535262	23418	Gain	2.16404e-06
2	106511723	106511723	2	Gain	2.16404e-06
2	97713774	98277321	563549	Gain	2.16404e-06
2	114721989	115112327	390340	Gain	3.19599e-06
2	99827734	99928334	100602	Gain	3.19599e-06
2	100584669	100598334	13667	Gain	3.19599e-06
2	100676623	100686172	9551	Gain	3.19599e-06
2	101164814	101178350	13538	Gain	3.19599e-06
2	114148962	114293990	145030	Gain	3.19599e-06
2	113753125	113753582	459	Gain	3.19599e-06
2	113070286	113111869	41585	Gain	3.19599e-06
2	101200966	101484533	283569	Gain	3.19599e-06
2	112767406	113070215	302811	Gain	3.19599e-06
2	110459506	112478123	2018619	Gain	3.19599e-06
2	102839383	103100494	261113	Gain	3.19599e-06
2	108747607	108747756	151	Gain	3.19599e-06
2	70344090	70473453	129365	Gain	3.56578e-06
2	99093259	99099973	6716	Gain	3.56578e-06
2	98429595	98434549	4956	Gain	3.56578e-06
2	99113352	99472126	358776	Gain	3.56578e-06
2	98277323	98279049	1728	Gain	3.56578e-06
2	109993208	109993264	58	Gain	3.56578e-06
2	99928335	99937730	9397	Gain	5.00774e-06
2	103100495	103938361	837868	Gain	5.00774e-06
2	103943399	104165823	222426	Gain	5.00774e-06
2	106191692	106511722	320032	Gain	5.00774e-06
2	106511724	106511845	123	Gain	5.00774e-06
2	106535263	106535568	307	Gain	5.00774e-06
2	106546749	106983692	436945	Gain	5.00774e-06
2	106985495	107040336	54843	Gain	5.00774e-06
2	107129450	107133097	3649	Gain	5.00774e-06
2	107931510	108747606	816098	Gain	5.00774e-06
2	108747757	108937834	190079	Gain	5.00774e-06
[truncated: 21,452 more rows]

## Sheet: Source Data Fig 2C
Source data Fig. 2C: Mutation count of UCHL1-related (B1a&B2b) and other (A&B1b) cluster in TCGA-HNSC
Sample ID	Mutation Count	Classification
TCGA-4P-AA8J-01	112	Other
TCGA-BA-4074-01	128	UCHL1-related
TCGA-BA-4076-01	293	Other
TCGA-BA-4078-01	381	UCHL1-related
TCGA-BA-5149-01	109	Other
TCGA-BA-5151-01	67	Other
TCGA-BA-5152-01	435	Other
TCGA-BA-5555-01	130	UCHL1-related
TCGA-BA-5556-01	126	Other
TCGA-BA-5557-01	38	Other
TCGA-BA-5558-01	126	Other
TCGA-BA-6868-01	140	Other
TCGA-BA-6869-01	427	UCHL1-related
TCGA-BA-6870-01	83	Other
TCGA-BA-6872-01	159	Other
TCGA-BA-6873-01	58	Other
TCGA-BA-7269-01	79	Other
TCGA-BA-A4IF-01	90	UCHL1-related
TCGA-BA-A4IH-01	44	UCHL1-related
TCGA-BA-A4II-01	91	Other
TCGA-BA-A6D8-01	107	UCHL1-related
TCGA-BA-A6DA-01	617	Other
TCGA-BA-A6DB-01	18	Other
TCGA-BA-A6DD-01	53	Other
TCGA-BA-A6DE-01	106	UCHL1-related
TCGA-BA-A6DG-01	20	Other
TCGA-BA-A6DI-01	93	Other
TCGA-BA-A6DJ-01	232	Other
TCGA-BA-A6DL-01	80	UCHL1-related
TCGA-BA-A8YP-01	131	UCHL1-related
TCGA-BB-4217-01	27	Other
TCGA-BB-4224-01	73	Other
TCGA-BB-4227-01	203	Other
TCGA-BB-7862-01		UCHL1-related
TCGA-BB-7863-01		Other
TCGA-BB-7864-01		UCHL1-related
TCGA-BB-7870-01	257	UCHL1-related
TCGA-BB-7871-01		UCHL1-related
TCGA-BB-7872-01		Other
TCGA-BB-8596-01	72	Other
TCGA-BB-8601-01	55	UCHL1-related
TCGA-BB-A5HU-01	156	Other
TCGA-BB-A5HY-01	187	Other
TCGA-BB-A5HZ-01	59	UCHL1-related
TCGA-BB-A6UO-01	101	Other
TCGA-C9-A47Z-01	90	Other
TCGA-C9-A480-01	41	Other
TCGA-CN-4722-01		Other
TCGA-CN-4723-01	742	Other
TCGA-CN-4725-01	49	Other
TCGA-CN-4726-01	54	Other
TCGA-CN-4727-01	385	UCHL1-related
TCGA-CN-4728-01	113	Other
TCGA-CN-4729-01	120	Other
TCGA-CN-4730-01	143	UCHL1-related
TCGA-CN-4731-01	97	UCHL1-related
TCGA-CN-4733-01	22	Other
TCGA-CN-4734-01	130	Other
TCGA-CN-4735-01	122	UCHL1-related
TCGA-CN-4736-01	90	Other
TCGA-CN-4737-01	35	Other
TCGA-CN-4738-01	82	Other
TCGA-CN-4739-01	186	UCHL1-related
TCGA-CN-4740-01	128	Other
TCGA-CN-4742-01	65	Other
TCGA-CN-5355-01	95	Other
TCGA-CN-5356-01	316	UCHL1-related
TCGA-CN-5358-01	35	Other
TCGA-CN-5359-01	134	Other
TCGA-CN-5360-01	463	UCHL1-related
TCGA-CN-5361-01	94	Other
TCGA-CN-5363-01	162	Other
TCGA-CN-5364-01	129	Other
TCGA-CN-5365-01	70	Other
TCGA-CN-5366-01	91	Other
TCGA-CN-5367-01	91	Other
TCGA-CN-5369-01	409	Other
TCGA-CN-5370-01	100	Other
TCGA-CN-5373-01	128	Other
TCGA-CN-6010-01	1668	UCHL1-related
TCGA-CN-6011-01	321	Other
TCGA-CN-6012-01	109	UCHL1-related
TCGA-CN-6013-01	173	Other
TCGA-CN-6016-01	105	Other
TCGA-CN-6017-01	2	Other
TCGA-CN-6018-01	97	Other
TCGA-CN-6019-01	124	UCHL1-related
TCGA-CN-6020-01	126	Other
TCGA-CN-6021-01	258	UCHL1-related
TCGA-CN-6022-01	65	Other
TCGA-CN-6023-01	101	UCHL1-related
TCGA-CN-6024-01	129	UCHL1-related
TCGA-CN-6988-01	179	UCHL1-related
TCGA-CN-6989-01	88	UCHL1-related
TCGA-CN-6992-01	316	UCHL1-related
TCGA-CN-6994-01	107	Other
TCGA-CN-6995-01	208	Other
TCGA-CN-6996-01	49	Other
TCGA-CN-6997-01	197	UCHL1-related
TCGA-CN-6998-01	65	Other
TCGA-CN-A497-01	316	UCHL1-related
TCGA-CN-A498-01	108	Other
TCGA-CN-A499-01	37	Other
TCGA-CN-A49A-01	105	UCHL1-related
TCGA-CN-A49B-01	90	Other
TCGA-CN-A63T-01	223	UCHL1-related
TCGA-CN-A63U-01	477	UCHL1-related
TCGA-CN-A63V-01	78	Other
TCGA-CN-A63W-01	350	UCHL1-related
TCGA-CN-A641-01	184	UCHL1-related
TCGA-CN-A642-01	74	Other
TCGA-CN-A6V3-01	205	UCHL1-related
TCGA-CQ-5324-01	65	Other
TCGA-CQ-5325-01	52	Other
TCGA-CQ-5326-01	184	Other
TCGA-CQ-5327-01	203	Other
TCGA-CQ-5329-01	29	Other
TCGA-CQ-5330-01	58	Other
TCGA-CQ-5331-01	127	Other
TCGA-CQ-5332-01	132	UCHL1-related
TCGA-CQ-5333-01	183	Other
TCGA-CQ-5334-01	168	Other
TCGA-CQ-6218-01	114	Other
TCGA-CQ-6219-01	66	Other
TCGA-CQ-6220-01	100	Other
TCGA-CQ-6222-01	61	Other
TCGA-CQ-6223-01	94	Other
TCGA-CQ-6224-01	53	Other
TCGA-CQ-6225-01	136	UCHL1-related
TCGA-CQ-6227-01	50	Other
TCGA-CQ-6228-01	104	UCHL1-related
TCGA-CQ-6229-01	26	Other
TCGA-CQ-7063-01	122	Other
TCGA-CQ-7065-01	33	Other
TCGA-CQ-7067-01		Other
TCGA-CQ-7068-01	90	Other
TCGA-CQ-7069-01	85	Other
TCGA-CQ-7071-01	421	Other
TCGA-CQ-7072-01	116	UCHL1-related
TCGA-CQ-A4C6-01	94	Other
TCGA-CQ-A4C9-01	84	UCHL1-related
TCGA-CQ-A4CA-01		Other
TCGA-CQ-A4CB-01	90	Other
TCGA-CQ-A4CD-01	144	Other
TCGA-CQ-A4CE-01	60	Other
TCGA-CQ-A4CG-01	67	Other
TCGA-CQ-A4CH-01	22	Other
TCGA-CQ-A4CI-01	90	UCHL1-related
TCGA-CR-5247-01	67	UCHL1-related
TCGA-CR-6471-01	113	Other
TCGA-CR-6474-01	90	Other
TCGA-CR-6477-01	73	Other
TCGA-CR-6478-01	92	Other
TCGA-CR-6481-01	431	Other
TCGA-CR-6484-01	226	Other
TCGA-CR-6488-01	35	Other
TCGA-CR-6491-01	119	Other
TCGA-CR-6492-01	51	Other
TCGA-CR-6493-01	34	Other
TCGA-CR-7364-01	419	UCHL1-related
TCGA-CR-7365-01	147	Other
TCGA-CR-7367-01	157	Other
TCGA-CR-7370-01	468	UCHL1-related
TCGA-CR-7371-01	289	UCHL1-related
TCGA-CR-7372-01	44	Other
TCGA-CR-7373-01	98	Other
TCGA-CR-7374-01	316	UCHL1-related
TCGA-CR-7376-01	51	Other
TCGA-CR-7377-01	103	Other
TCGA-CR-7379-01	120	Other
TCGA-CR-7380-01	85	Other
TCGA-CR-7382-01	78	Other
TCGA-CR-7383-01	104	Other
TCGA-CR-7386-01	158	Other
TCGA-CR-7388-01	702	UCHL1-related
TCGA-CR-7389-01	109	Other
TCGA-CR-7390-01	143	Other
TCGA-CR-7391-01	28	Other
TCGA-CR-7392-01	23	Other
TCGA-CR-7393-01		Other
TCGA-CR-7394-01	140	Other
TCGA-CR-7395-01	143	Other
TCGA-CR-7397-01	34	Other
TCGA-CR-7398-01	345	UCHL1-related
TCGA-CR-7401-01	67	Other
TCGA-CR-7402-01	917	UCHL1-related
TCGA-CV-5430-01	125	Other
TCGA-CV-5432-01	240	Other
TCGA-CV-5434-01	131	UCHL1-related
TCGA-CV-5435-01	102	UCHL1-related
TCGA-CV-5436-01	88	Other
TCGA-CV-5439-01	97	Other
TCGA-CV-5440-01	101	Other
TCGA-CV-5441-01	336	UCHL1-related
TCGA-CV-5442-01	223	Other
TCGA-CV-5444-01	110	Other
TCGA-CV-5966-01	100	Other
TCGA-CV-5970-01	166	Other
TCGA-CV-5971-01	15	Other
TCGA-CV-5973-01	47	Other
TCGA-CV-5976-01	65	Other
TCGA-CV-5977-01	68	Other
TCGA-CV-5978-01	159	UCHL1-related
TCGA-CV-5979-01	30	Other
TCGA-CV-6003-01	94	Other
TCGA-CV-6436-01	67	Other
TCGA-CV-6441-01	200	UCHL1-related
TCGA-CV-6933-01	145	Other
TCGA-CV-6934-01	83	Other
TCGA-CV-6935-01	202	UCHL1-related
TCGA-CV-6936-01	268	Other
TCGA-CV-6937-01	146	UCHL1-related
TCGA-CV-6938-01	136	Other
TCGA-CV-6940-01	123	Other
TCGA-CV-6941-01	147	UCHL1-related
TCGA-CV-6942-01	208	Other
TCGA-CV-6943-01	71	Other
TCGA-CV-6945-01	123	Other
TCGA-CV-6948-01	175	UCHL1-related
TCGA-CV-6950-01	59	Other
TCGA-CV-6951-01	127	Other
TCGA-CV-6952-01	150	Other
TCGA-CV-6953-01	150	Other
TCGA-CV-6954-01	124	UCHL1-related
TCGA-CV-6955-01	99	Other
TCGA-CV-6956-01	154	Other
TCGA-CV-6959-01	54	Other
TCGA-CV-6960-01	159	UCHL1-related
TCGA-CV-6961-01	500	UCHL1-related
TCGA-CV-6962-01	138	UCHL1-related
TCGA-CV-7089-01	159	Other
TCGA-CV-7090-01	72	Other
TCGA-CV-7091-01	144	UCHL1-related
TCGA-CV-7095-01	210	Other
TCGA-CV-7097-01	107	Other
TCGA-CV-7099-01	266	Other
TCGA-CV-7101-01	187	UCHL1-related
TCGA-CV-7102-01	169	Other
TCGA-CV-7103-01	74	UCHL1-related
TCGA-CV-7104-01	121	Other
TCGA-CV-7177-01	97	UCHL1-related
TCGA-CV-7178-01	112	Other
TCGA-CV-7180-01	49	Other
TCGA-CV-7183-01	54	Other
TCGA-CV-7235-01	120	Other
TCGA-CV-7236-01	37	Other
TCGA-CV-7238-01	137	Other
TCGA-CV-7242-01	301	UCHL1-related
TCGA-CV-7243-01	93	Other
TCGA-CV-7245-01	466	UCHL1-related
TCGA-CV-7247-01	81	Other
TCGA-CV-7248-01	267	UCHL1-related
TCGA-CV-7250-01	246	UCHL1-related
TCGA-CV-7252-01	232	Other
TCGA-CV-7253-01	169	UCHL1-related
TCGA-CV-7254-01	256	UCHL1-related
TCGA-CV-7255-01	102	Other
TCGA-CV-7261-01	173	UCHL1-related
TCGA-CV-7263-01	117	Other
TCGA-CV-7407-01	106	Other
TCGA-CV-7409-01		UCHL1-related
TCGA-CV-7410-01	37	Other
TCGA-CV-7411-01	106	Other
TCGA-CV-7413-01	67	Other
TCGA-CV-7414-01	231	Other
TCGA-CV-7415-01	225	Other
TCGA-CV-7416-01	65	Other
TCGA-CV-7418-01	147	UCHL1-related
TCGA-CV-7421-01	160	Other
TCGA-CV-7422-01	121	Other
TCGA-CV-7423-01	63	Other
TCGA-CV-7424-01	169	UCHL1-related
TCGA-CV-7425-01	102	Other
TCGA-CV-7427-01	396	Other
TCGA-CV-7428-01		UCHL1-related
TCGA-CV-7429-01	50	Other
TCGA-CV-7430-01	97	Other
TCGA-CV-7432-01	135	Other
TCGA-CV-7433-01	106	Other
TCGA-CV-7434-01	83	Other
TCGA-CV-7435-01	79	Other
TCGA-CV-7437-01	118	UCHL1-related
TCGA-CV-7438-01	89	Other
TCGA-CV-7440-01	199	UCHL1-related
TCGA-CV-7446-01	123	UCHL1-related
TCGA-CV-7568-01	1922	Other
TCGA-CV-A45O-01	138	Other
TCGA-CV-A45P-01	143	Other
TCGA-CV-A45Q-01	250	Other
TCGA-CV-A45R-01	79	Other
TCGA-CV-A45T-01	11	Other
TCGA-CV-A45U-01	173	UCHL1-related
TCGA-CV-A45V-01	92	Other
TCGA-CV-A45W-01	556	UCHL1-related
TCGA-CV-A45X-01	91	Other
TCGA-CV-A45Y-01	64	Other
TCGA-CV-A45Z-01	639	UCHL1-related
TCGA-CV-A461-01	530	UCHL1-related
TCGA-CV-A463-01	187	Other
TCGA-CV-A464-01	19	Other
TCGA-CV-A465-01	33	Other
TCGA-CV-A468-01	338	Other
TCGA-CV-A6JD-01	82	Other
TCGA-CV-A6JE-01	120	Other
TCGA-CV-A6JM-01	225	Other
TCGA-CV-A6JN-01	69	Other
TCGA-CV-A6JO-01	68	Other
TCGA-CV-A6JT-01	46	Other
TCGA-CV-A6JU-01	119	UCHL1-related
TCGA-CV-A6JY-01	84	Other
TCGA-CV-A6JZ-01	96	Other
TCGA-CV-A6K0-01	14	Other
TCGA-CV-A6K1-01	454	Other
TCGA-CV-A6K2-01	587	Other
TCGA-CX-7085-01	129	Other
TCGA-CX-7086-01	208	Other
TCGA-CX-7219-01	120	Other
TCGA-CX-A4AQ-01	93	UCHL1-related
TCGA-D6-6515-01	42	Other
TCGA-D6-6516-01	1531	Other
TCGA-D6-6517-01	63	Other
TCGA-D6-6823-01	152	UCHL1-related
TCGA-D6-6824-01	48	Other
TCGA-D6-6825-01	65	Other
TCGA-D6-6826-01	91	Other
TCGA-D6-6827-01	16	UCHL1-related
TCGA-D6-8568-01	100	Other
TCGA-D6-8569-01	113	Other
TCGA-D6-A4Z9-01	77	Other
TCGA-D6-A4ZB-01	163	Other
TCGA-D6-A6EK-01	154	Other
TCGA-D6-A6EM-01	91	Other
TCGA-D6-A6EN-01	89	Other
TCGA-D6-A6EO-01	79	UCHL1-related
TCGA-D6-A6EP-01	106	UCHL1-related
TCGA-D6-A6EQ-01	79	Other
TCGA-D6-A6ES-01	174	Other
TCGA-D6-A74Q-01	373	UCHL1-related
TCGA-DQ-5624-01	84	Other
TCGA-DQ-5625-01	175	Other
TCGA-DQ-5629-01	286	UCHL1-related
TCGA-DQ-5630-01	62	Other
TCGA-DQ-5631-01	75	Other
TCGA-DQ-7588-01	91	Other
TCGA-DQ-7589-01		UCHL1-related
TCGA-DQ-7592-01	66	Other
TCGA-DQ-7595-01		UCHL1-related
TCGA-F7-7848-01	282	UCHL1-related
TCGA-F7-8298-01	87	Other
TCGA-F7-8489-01	124	Other
TCGA-F7-A50G-01	88	Other
TCGA-F7-A50I-01	128	Other
TCGA-F7-A50J-01	146	Other
TCGA-F7-A61S-01	90	Other
TCGA-F7-A61V-01	95	UCHL1-related
TCGA-F7-A61W-01	57	Other
TCGA-F7-A620-01	47	Other
TCGA-F7-A622-01	54	Other
TCGA-F7-A623-01	164	Other
TCGA-F7-A624-01	2744	Other
TCGA-H7-7774-01	135	Other
TCGA-H7-8501-01	136	Other
TCGA-H7-8502-01		Other
TCGA-H7-A6C4-01	33	Other
TCGA-HD-7229-01	151	Other
TCGA-HD-7753-01	93	Other
TCGA-HD-7831-01	34	Other
TCGA-HD-7832-01	83	Other
TCGA-HD-7917-01		UCHL1-related
TCGA-HD-8224-01	74	Other
TCGA-HD-8634-01	62	Other
TCGA-HD-8635-01	179	Other
TCGA-HD-A4C1-01	175	Other
TCGA-HD-A633-01	122	Other
TCGA-HD-A634-01	37	UCHL1-related
TCGA-HD-A6HZ-01	71	Other
TCGA-HD-A6I0-01	66	Other
TCGA-IQ-7630-01	111	Other
TCGA-IQ-7631-01	24	Other
TCGA-IQ-7632-01	57	Other
TCGA-IQ-A61E-01	160	Other
TCGA-IQ-A61G-01	121	Other
TCGA-IQ-A61H-01	128	UCHL1-related
TCGA-IQ-A61J-01	34	Other
TCGA-IQ-A61O-01	33	Other
TCGA-IQ-A6SG-01	88	Other
TCGA-IQ-A6SH-01	63	Other
TCGA-KU-A66S-01	479	UCHL1-related
TCGA-KU-A66T-01	96	Other
TCGA-KU-A6H8-01	22	Other
TCGA-MT-A51W-01	61	Other
TCGA-MT-A51X-01	47	Other
TCGA-MT-A67A-01	101	Other
TCGA-MT-A67D-01	86	Other
TCGA-MT-A67F-01	280	Other
TCGA-MT-A7BN-01	56	UCHL1-related
TCGA-MZ-A5BI-01	32	UCHL1-related
TCGA-MZ-A7D7-01	129	Other
TCGA-P3-A5Q6-01	108	Other
TCGA-P3-A5QA-01	66	Other
TCGA-P3-A6SX-01	151	Other
TCGA-P3-A6T0-01	78	Other
TCGA-P3-A6T2-01	46	Other
TCGA-P3-A6T3-01	96	Other
TCGA-P3-A6T4-01	122	Other
TCGA-P3-A6T5-01	197	Other
TCGA-P3-A6T7-01	124	Other
TCGA-P3-A6T8-01	82	Other
TCGA-QK-A64Z-01	68	Other
TCGA-QK-A652-01	45	Other
TCGA-QK-A6IF-01	23	UCHL1-related
TCGA-QK-A6IG-01	109	Other
TCGA-QK-A6IH-01	65	Other
TCGA-QK-A6II-01	155	Other
TCGA-QK-A6IJ-01	59	Other
TCGA-QK-A6VB-01	421	UCHL1-related
TCGA-QK-A6VC-01	178	Other
TCGA-QK-A8Z7-01	133	UCHL1-related
TCGA-QK-A8Z8-01	345	UCHL1-related
TCGA-QK-A8Z9-01	102	Other
TCGA-QK-A8ZA-01	103	UCHL1-related
TCGA-QK-A8ZB-01	91	Other
TCGA-QK-AA3J-01	102	UCHL1-related
TCGA-QK-AA3K-01	86	Other
TCGA-RS-A6TO-01	144	Other
TCGA-T2-A6WX-01	174	Other
TCGA-T2-A6WZ-01	84	Other
TCGA-T2-A6X2-01	322	Other
TCGA-T3-A92M-01	314	Other
TCGA-T3-A92N-01	144	Other
TCGA-TN-A7HI-01	50	UCHL1-related
TCGA-TN-A7HJ-01	104	Other
TCGA-UF-A718-01	53	Other
TCGA-UF-A719-01	102	UCHL1-related
TCGA-UF-A71A-01	168	UCHL1-related
TCGA-UF-A71B-01	126	Other
TCGA-UF-A71D-01	386	UCHL1-related
TCGA-UF-A71E-01	134	UCHL1-related
TCGA-UF-A7J9-01	224	UCHL1-related
TCGA-UF-A7JA-01	193	UCHL1-related
TCGA-UF-A7JC-01	53	Other
TCGA-UF-A7JD-01	99	UCHL1-related
TCGA-UF-A7JF-01	89	UCHL1-related
TCGA-UF-A7JH-01	65	UCHL1-related
TCGA-UF-A7JJ-01	80	Other
TCGA-UF-A7JK-01	89	Other
TCGA-UF-A7JO-01	154	Other
TCGA-UF-A7JS-01	58	Other
TCGA-UF-A7JT-01	173	Other
TCGA-UF-A7JV-01	68	Other
TCGA-WA-A7GZ-01	184	Other
TCGA-WA-A7H4-01	62	Other

## Sheet: Source Data Fig 2D
Source data Fig. 2D: Comparison of significant MutSig genes between UCHL1-related and other tumors in TCGA-HNSC
Gene	Entrez_Gene_ID	MutSig 2.0	p-value (Chi square test)		Gene	Samples altered (absolute)	Samples altered (percent)	Classification
TP53	7157	Significant	0.173246		PIK3CA	91	0.28	Other
FAT1	2195	Significant	0.664032		NOTCH1	84	0.26	Other
CDKN2A	1029	Significant	0.0657454		CASP8	58	0.18	Other
PIK3CA	5290	Significant	0.000316408		HRAS	29	0.09	Other
NOTCH1	4851	Significant	0.0125974		EP300	29	0.09	Other
NSD1	64324	Significant	1.57664e-24		FBXW7	21	0.06	Other
CASP8	841	Significant	0.0045151		NSD1	12	0.04	Other
EP300	2033	Significant	0.0421438		PIK3CA	56	0.46	UCHL1-related
FBXW7	55294	Significant	0.0438722		NSD1	50	0.41	UCHL1-related
HRAS	3265	Significant	0.00634253		NOTCH1	16	0.13	UCHL1-related
HLA-A	3105	Significant	0.24771		FBXW7	15	0.12	UCHL1-related
NFE2L2	4780	Significant	0.739726		CASP8	7	0.06	UCHL1-related
					EP300	3	0.024	UCHL1-related
					HRAS	1	0.008	UCHL1-related

## Sheet: Source Data Fig. 2E
Source data Fig. 2E: Qualitative analysis of NSD1 alterations in TCGA-HNSC
Cluster	Type of alteration	absolute	relative
B1a	Missense & euploid	7	12.963
B1a	Splicing site & euploid	1	1.85185
B1a	Truncating & euploid	31	57.4074
B1a	WT & Del	4	7.40741
B1a	WT & euploid	11	20.3704
B2b	Missense & euploid	2	2.89855
B2b	Truncating & euploid	5	7.24638
B2b	WT & euploid	62	89.8551
Other	Missense & euploid	8	2.43161
Other	Truncating & euploid	3	0.911854
Other	WT & Del	1	0.303951
Other	WT & euploid	317	96.3526

## Sheet: Source Data Fig. 2F
Source data Fig. 2F: Global mean beta values within clusters in TCGA-HNSC
Sample ID	Global mean beta	Cluster
TCGA-4P-AA8J-01	0.310146	Other
TCGA-BA-4074-01	0.303002	B1a
TCGA-BA-4076-01	0.388549	Other
TCGA-BA-4078-01	0.338394	B2b
TCGA-BA-5149-01	0.338557	Other
TCGA-BA-5151-01	0.375952	Other
TCGA-BA-5152-01	0.332634	Other
TCGA-BA-5555-01	0.29273	B1a
TCGA-BA-5556-01	0.361756	Other
TCGA-BA-5557-01	0.34443	Other
TCGA-BA-5558-01	0.33637	Other
TCGA-BA-6868-01	0.345193	Other
TCGA-BA-6869-01	0.271369	B1a
TCGA-BA-6870-01	0.357951	Other
TCGA-BA-6872-01	0.368397	Other
TCGA-BA-6873-01	0.370249	Other
TCGA-BA-7269-01	0.316352	Other
TCGA-BA-A4IF-01	0.29809	B1a
TCGA-BA-A4IH-01	0.336262	B2b
TCGA-BA-A4II-01	0.345449	Other
TCGA-BA-A6D8-01	0.328019	B2b
TCGA-BA-A6DA-01	0.341811	Other
TCGA-BA-A6DB-01	0.32398	Other
TCGA-BA-A6DD-01	0.33525	Other
TCGA-BA-A6DE-01	0.278326	B1a
TCGA-BA-A6DG-01	0.322396	Other
TCGA-BA-A6DI-01	0.316983	Other
TCGA-BA-A6DJ-01	0.413072	Other
TCGA-BA-A6DL-01	0.286304	B1a
TCGA-BA-A8YP-01	0.290375	B2b
TCGA-BB-4217-01	0.349329	Other
TCGA-BB-4224-01	0.334376	Other
TCGA-BB-4227-01	0.314699	Other
TCGA-BB-7862-01	0.318434	B2b
TCGA-BB-7863-01	0.348425	Other
TCGA-BB-7864-01	0.28962	B1a
TCGA-BB-7870-01	0.226171	B1a
TCGA-BB-7871-01	0.348425	B2b
TCGA-BB-7872-01	0.342698	Other
TCGA-BB-8596-01	0.316463	Other
TCGA-BB-8601-01	0.371682	B2b
TCGA-BB-A5HU-01	0.316713	Other
TCGA-BB-A5HY-01	0.37663	Other
TCGA-BB-A5HZ-01	0.30072	B1a
TCGA-BB-A6UO-01	0.368826	Other
TCGA-C9-A47Z-01	0.336248	Other
TCGA-C9-A480-01	0.361184	Other
TCGA-CN-4722-01	0.361569	Other
TCGA-CN-4723-01	0.339334	Other
TCGA-CN-4725-01	0.332436	Other
TCGA-CN-4726-01	0.367475	Other
TCGA-CN-4727-01	0.278247	B1a
TCGA-CN-4728-01	0.358079	Other
TCGA-CN-4729-01	0.352277	Other
TCGA-CN-4730-01	0.278607	B1a
TCGA-CN-4731-01	0.291037	B1a
TCGA-CN-4733-01	0.362355	Other
TCGA-CN-4734-01	0.413945	Other
TCGA-CN-4735-01	0.319003	B2b
TCGA-CN-4736-01	0.333863	Other
TCGA-CN-4737-01	0.27042	Other
TCGA-CN-4738-01	0.318509	Other
TCGA-CN-4739-01	0.292516	B1a
TCGA-CN-4740-01	0.324282	Other
TCGA-CN-4742-01	0.301238	Other
TCGA-CN-5355-01	0.358547	Other
TCGA-CN-5356-01	0.298492	B1a
TCGA-CN-5358-01	0.327967	Other
TCGA-CN-5359-01	0.363473	Other
TCGA-CN-5360-01	0.323415	B2b
TCGA-CN-5361-01	0.363112	Other
TCGA-CN-5363-01	0.404158	Other
TCGA-CN-5364-01	0.346663	Other
TCGA-CN-5365-01	0.354684	Other
TCGA-CN-5366-01	0.408705	Other
TCGA-CN-5367-01	0.373162	Other
TCGA-CN-5369-01	0.343083	Other
TCGA-CN-5370-01	0.328929	Other
TCGA-CN-5373-01	0.357733	Other
TCGA-CN-6010-01	0.362282	B2b
TCGA-CN-6011-01	0.371649	Other
TCGA-CN-6012-01	0.34389	B2b
TCGA-CN-6013-01	0.340368	Other
TCGA-CN-6016-01	0.370722	Other
TCGA-CN-6017-01	0.360989	Other
TCGA-CN-6018-01	0.367524	Other
TCGA-CN-6019-01	0.340823	B2b
TCGA-CN-6020-01	0.342531	Other
TCGA-CN-6021-01	0.361768	B2b
TCGA-CN-6022-01	0.293085	Other
TCGA-CN-6023-01	0.367108	B2b
TCGA-CN-6024-01	0.367517	B2b
TCGA-CN-6988-01	0.290453	B1a
TCGA-CN-6989-01	0.370028	B2b
TCGA-CN-6992-01	0.295435	B2b
TCGA-CN-6994-01	0.334041	Other
TCGA-CN-6995-01	0.3388	Other
TCGA-CN-6996-01	0.381445	Other
TCGA-CN-6997-01	0.31023	B2b
TCGA-CN-6998-01	0.35048	Other
TCGA-CN-A497-01	0.261799	B1a
TCGA-CN-A498-01	0.351906	Other
TCGA-CN-A499-01	0.353508	Other
TCGA-CN-A49A-01	0.235108	B2b
TCGA-CN-A49B-01	0.364455	Other
TCGA-CN-A63T-01	0.289668	B1a
TCGA-CN-A63U-01	0.253978	B1a
TCGA-CN-A63V-01	0.299318	Other
TCGA-CN-A63W-01	0.246064	B1a
TCGA-CN-A641-01	0.258277	B1a
TCGA-CN-A642-01	0.35294	Other
TCGA-CN-A6V3-01	0.275911	B1a
TCGA-CQ-5324-01	0.33112	Other
TCGA-CQ-5325-01	0.378309	Other
TCGA-CQ-5326-01	0.347099	Other
TCGA-CQ-5327-01	0.382726	Other
TCGA-CQ-5329-01	0.32323	Other
TCGA-CQ-5330-01	0.400341	Other
TCGA-CQ-5331-01	0.370682	Other
TCGA-CQ-5332-01	0.344549	B2b
TCGA-CQ-5333-01	0.399679	Other
TCGA-CQ-5334-01	0.399528	Other
TCGA-CQ-6218-01	0.343873	Other
TCGA-CQ-6219-01	0.357947	Other
TCGA-CQ-6220-01	0.324618	Other
TCGA-CQ-6222-01	0.3666	Other
TCGA-CQ-6223-01	0.340192	Other
TCGA-CQ-6224-01	0.350683	Other
TCGA-CQ-6225-01	0.228604	B1a
TCGA-CQ-6227-01	0.330531	Other
TCGA-CQ-6228-01	0.280943	B2b
TCGA-CQ-6229-01	0.359165	Other
TCGA-CQ-7063-01	0.383142	Other
TCGA-CQ-7065-01	0.291658	Other
TCGA-CQ-7067-01	0.318255	Other
TCGA-CQ-7068-01	0.409125	Other
TCGA-CQ-7069-01	0.296986	Other
TCGA-CQ-7071-01	0.346671	Other
TCGA-CQ-7072-01	0.272018	B2b
TCGA-CQ-A4C6-01	0.361022	Other
TCGA-CQ-A4C9-01	0.283694	B1a
TCGA-CQ-A4CA-01	0.334748	Other
TCGA-CQ-A4CB-01	0.369985	Other
TCGA-CQ-A4CD-01	0.342626	Other
TCGA-CQ-A4CE-01	0.332653	Other
TCGA-CQ-A4CG-01	0.334458	Other
TCGA-CQ-A4CH-01	0.327042	Other
TCGA-CQ-A4CI-01	0.32397	B2b
TCGA-CR-5247-01	0.276509	B1a
TCGA-CR-6471-01	0.377698	Other
TCGA-CR-6474-01	0.340404	Other
TCGA-CR-6477-01	0.344293	Other
TCGA-CR-6478-01	0.371532	Other
TCGA-CR-6481-01	0.352243	Other
TCGA-CR-6484-01	0.318694	Other
TCGA-CR-6488-01	0.325456	Other
TCGA-CR-6491-01	0.400421	Other
TCGA-CR-6492-01	0.326505	Other
TCGA-CR-6493-01	0.350291	Other
TCGA-CR-7364-01	0.262224	B1a
TCGA-CR-7365-01	0.361595	Other
TCGA-CR-7367-01	0.360239	Other
TCGA-CR-7370-01	0.299973	B2b
TCGA-CR-7371-01	0.320893	B2b
TCGA-CR-7372-01	0.308854	Other
TCGA-CR-7373-01	0.34886	Other
TCGA-CR-7374-01	0.317201	B2b
TCGA-CR-7376-01	0.352552	Other
TCGA-CR-7377-01	0.345774	Other
TCGA-CR-7379-01	0.282798	Other
TCGA-CR-7380-01	0.345318	Other
TCGA-CR-7382-01	0.350551	Other
TCGA-CR-7383-01	0.359348	Other
TCGA-CR-7386-01	0.334136	Other
TCGA-CR-7388-01	0.324723	B2b
TCGA-CR-7389-01	0.332774	Other
TCGA-CR-7390-01	0.312538	Other
TCGA-CR-7391-01	0.335035	Other
TCGA-CR-7392-01	0.317396	Other
TCGA-CR-7393-01	0.32832	Other
TCGA-CR-7394-01	0.341762	Other
TCGA-CR-7395-01	0.356581	Other
TCGA-CR-7397-01	0.313753	Other
TCGA-CR-7398-01	0.233548	B2b
TCGA-CR-7401-01	0.340147	Other
TCGA-CR-7402-01	0.279254	B1a
TCGA-CV-5430-01	0.378467	Other
TCGA-CV-5432-01	0.32022	Other
TCGA-CV-5434-01	0.353278	B2b
TCGA-CV-5435-01	0.372967	B2b
TCGA-CV-5436-01	0.34483	Other
TCGA-CV-5439-01	0.328911	Other
TCGA-CV-5440-01	0.306663	Other
TCGA-CV-5441-01	0.279021	B1a
TCGA-CV-5442-01	0.324396	Other
TCGA-CV-5444-01	0.345617	Other
TCGA-CV-5966-01	0.385448	Other
TCGA-CV-5970-01	0.34309	Other
TCGA-CV-5971-01	0.360792	Other
TCGA-CV-5973-01	0.324181	Other
TCGA-CV-5976-01	0.376536	Other
TCGA-CV-5977-01	0.3917	Other
TCGA-CV-5978-01	0.376398	B2b
TCGA-CV-5979-01	0.332589	Other
TCGA-CV-6003-01	0.331838	Other
TCGA-CV-6436-01	0.355674	Other
TCGA-CV-6441-01	0.355336	B1a
TCGA-CV-6933-01	0.3074	Other
TCGA-CV-6934-01	0.33272	Other
TCGA-CV-6935-01	0.392971	B2b
TCGA-CV-6936-01	0.328268	Other
TCGA-CV-6937-01	0.314303	B2b
TCGA-CV-6938-01	0.37407	Other
TCGA-CV-6940-01	0.339569	Other
TCGA-CV-6941-01	0.277732	B1a
TCGA-CV-6942-01	0.391871	Other
TCGA-CV-6943-01	0.343418	Other
TCGA-CV-6945-01	0.339618	Other
TCGA-CV-6948-01	0.331701	B2b
TCGA-CV-6950-01	0.329186	Other
TCGA-CV-6951-01	0.308463	Other
TCGA-CV-6952-01	0.371711	Other
TCGA-CV-6953-01	0.365693	Other
TCGA-CV-6954-01	0.302905	B1a
TCGA-CV-6955-01	0.361218	Other
TCGA-CV-6956-01	0.266292	Other
TCGA-CV-6959-01	0.355063	Other
TCGA-CV-6960-01	0.310404	B1a
TCGA-CV-6961-01	0.326909	B2b
TCGA-CV-6962-01	0.328622	B2b
TCGA-CV-7089-01	0.384687	Other
TCGA-CV-7090-01	0.316628	Other
TCGA-CV-7091-01	0.270962	B1a
TCGA-CV-7095-01	0.352159	Other
TCGA-CV-7097-01	0.411767	Other
TCGA-CV-7099-01	0.358926	Other
TCGA-CV-7101-01	0.341603	B2b
TCGA-CV-7102-01	0.345794	Other
TCGA-CV-7103-01	0.280368	B2b
TCGA-CV-7104-01	0.34595	Other
TCGA-CV-7177-01	0.350575	B2b
TCGA-CV-7178-01	0.31338	Other
TCGA-CV-7180-01	0.320431	Other
TCGA-CV-7183-01	0.327799	Other
TCGA-CV-7235-01	0.323164	Other
TCGA-CV-7236-01	0.320556	Other
TCGA-CV-7238-01	0.349875	Other
TCGA-CV-7242-01	0.309402	B2b
TCGA-CV-7243-01	0.325089	Other
TCGA-CV-7245-01	0.251633	B1a
TCGA-CV-7247-01	0.30637	Other
TCGA-CV-7248-01	0.344153	B2b
TCGA-CV-7250-01	0.258079	B1a
TCGA-CV-7252-01	0.345565	Other
TCGA-CV-7253-01	0.255981	B1a
TCGA-CV-7254-01	0.350347	B2b
TCGA-CV-7255-01	0.280672	Other
TCGA-CV-7261-01	0.333308	B2b
TCGA-CV-7263-01	0.3098	Other
TCGA-CV-7407-01	0.365114	Other
TCGA-CV-7409-01	0.292251	B1a
TCGA-CV-7410-01	0.337673	Other
TCGA-CV-7411-01	0.335297	Other
TCGA-CV-7413-01	0.313621	Other
TCGA-CV-7414-01	0.321438	Other
TCGA-CV-7415-01	0.327942	Other
TCGA-CV-7416-01	0.309985	Other
TCGA-CV-7418-01	0.342997	B2b
TCGA-CV-7421-01	0.301936	Other
TCGA-CV-7422-01	0.333746	Other
TCGA-CV-7423-01	0.311584	Other
TCGA-CV-7424-01	0.326688	B2b
TCGA-CV-7425-01	0.394808	Other
TCGA-CV-7427-01	0.363972	Other
TCGA-CV-7428-01	0.319288	B1a
TCGA-CV-7429-01	0.332285	Other
TCGA-CV-7430-01	0.337883	Other
TCGA-CV-7432-01	0.349461	Other
TCGA-CV-7433-01	0.34235	Other
TCGA-CV-7434-01	0.415392	Other
TCGA-CV-7435-01	0.279909	Other
TCGA-CV-7437-01	0.354034	B2b
TCGA-CV-7438-01	0.34431	Other
TCGA-CV-7440-01	0.27549	B1a
TCGA-CV-7446-01	0.285157	B2b
TCGA-CV-7568-01	0.343055	Other
TCGA-CV-A45O-01	0.3535	Other
TCGA-CV-A45P-01	0.339281	Other
TCGA-CV-A45Q-01	0.39085	Other
TCGA-CV-A45R-01	0.317812	Other
TCGA-CV-A45T-01	0.351256	Other
TCGA-CV-A45U-01	0.317328	B2b
TCGA-CV-A45V-01	0.324361	Other
TCGA-CV-A45W-01	0.31883	B2b
TCGA-CV-A45X-01	0.313251	Other
TCGA-CV-A45Y-01	0.358152	Other
TCGA-CV-A45Z-01	0.316076	B2b
TCGA-CV-A461-01	0.320578	B1a
TCGA-CV-A463-01	0.40887	Other
TCGA-CV-A464-01	0.34374	Other
TCGA-CV-A465-01	0.304703	Other
TCGA-CV-A468-01	0.345308	Other
TCGA-CV-A6JD-01	0.364616	Other
TCGA-CV-A6JE-01	0.296314	Other
TCGA-CV-A6JM-01	0.283065	Other
TCGA-CV-A6JN-01	0.333597	Other
TCGA-CV-A6JO-01	0.349694	Other
TCGA-CV-A6JT-01	0.350194	Other
TCGA-CV-A6JU-01	0.300854	B1a
TCGA-CV-A6JY-01	0.290835	Other
TCGA-CV-A6JZ-01	0.370141	Other
TCGA-CV-A6K0-01	0.31603	Other
TCGA-CV-A6K1-01	0.30189	Other
TCGA-CV-A6K2-01	0.318701	Other
TCGA-CX-7085-01	0.34913	Other
TCGA-CX-7086-01	0.289244	Other
TCGA-CX-7219-01	0.347588	Other
TCGA-CX-A4AQ-01	0.35778	B2b
TCGA-D6-6515-01	0.35985	Other
TCGA-D6-6516-01	0.375709	Other
TCGA-D6-6517-01	0.353685	Other
TCGA-D6-6823-01	0.318236	B1a
TCGA-D6-6824-01	0.337254	Other
TCGA-D6-6825-01	0.351553	Other
TCGA-D6-6826-01	0.373334	Other
TCGA-D6-6827-01	0.319828	B2b
TCGA-D6-8568-01	0.330991	Other
TCGA-D6-8569-01	0.340676	Other
TCGA-D6-A4Z9-01	0.374986	Other
TCGA-D6-A4ZB-01	0.355727	Other
TCGA-D6-A6EK-01	0.334387	Other
TCGA-D6-A6EM-01	0.342005	Other
TCGA-D6-A6EN-01	0.348031	Other
TCGA-D6-A6EO-01	0.273409	B1a
TCGA-D6-A6EP-01	0.310587	B2b
TCGA-D6-A6EQ-01	0.324191	Other
TCGA-D6-A6ES-01	0.312811	Other
TCGA-D6-A74Q-01	0.294502	B1a
TCGA-DQ-5624-01	0.355699	Other
TCGA-DQ-5625-01	0.379207	Other
TCGA-DQ-5629-01	0.315144	B2b
TCGA-DQ-5630-01	0.359204	Other
TCGA-DQ-5631-01	0.341315	Other
TCGA-DQ-7588-01	0.314666	Other
TCGA-DQ-7589-01	0.353726	B2b
TCGA-DQ-7592-01	0.322849	Other
TCGA-DQ-7595-01	0.250197	B1a
TCGA-F7-7848-01	0.287245	B1a
TCGA-F7-8298-01	0.341743	Other
TCGA-F7-8489-01	0.342871	Other
TCGA-F7-A50G-01	0.353065	Other
TCGA-F7-A50I-01	0.336696	Other
TCGA-F7-A50J-01	0.313703	Other
TCGA-F7-A61S-01	0.348716	Other
TCGA-F7-A61V-01	0.293673	B1a
TCGA-F7-A61W-01	0.29632	Other
TCGA-F7-A620-01	0.374425	Other
TCGA-F7-A622-01	0.31475	Other
TCGA-F7-A623-01	0.322038	Other
TCGA-F7-A624-01	0.347574	Other
TCGA-H7-7774-01	0.362504	Other
TCGA-H7-8501-01	0.365708	Other
TCGA-H7-8502-01	0.348844	Other
TCGA-H7-A6C4-01	0.341087	Other
TCGA-HD-7229-01	0.373754	Other
TCGA-HD-7753-01	0.327236	Other
TCGA-HD-7831-01	0.318707	Other
TCGA-HD-7832-01	0.381361	Other
TCGA-HD-7917-01	0.297754	B1a
TCGA-HD-8224-01	0.308044	Other
TCGA-HD-8634-01	0.355376	Other
TCGA-HD-8635-01	0.351193	Other
TCGA-HD-A4C1-01	0.381087	Other
TCGA-HD-A633-01	0.331993	Other
TCGA-HD-A634-01	0.319718	B2b
TCGA-HD-A6HZ-01	0.323914	Other
TCGA-HD-A6I0-01	0.357407	Other
TCGA-IQ-7630-01	0.339126	Other
TCGA-IQ-7631-01	0.264324	Other
TCGA-IQ-7632-01	0.309987	Other
TCGA-IQ-A61E-01	0.351472	Other
TCGA-IQ-A61G-01	0.327167	Other
TCGA-IQ-A61H-01	0.321522	B2b
TCGA-IQ-A61J-01	0.324851	Other
TCGA-IQ-A61O-01	0.280376	Other
TCGA-IQ-A6SG-01	0.314717	Other
TCGA-IQ-A6SH-01	0.321217	Other
TCGA-KU-A66S-01	0.197647	B2b
TCGA-KU-A66T-01	0.284916	Other
TCGA-KU-A6H8-01	0.343674	Other
TCGA-MT-A51W-01	0.331053	Other
TCGA-MT-A51X-01	0.322467	Other
TCGA-MT-A67A-01	0.355165	Other
TCGA-MT-A67D-01	0.334303	Other
TCGA-MT-A67F-01	0.375021	Other
TCGA-MT-A7BN-01	0.351389	B2b
TCGA-MZ-A5BI-01	0.328789	B2b
TCGA-MZ-A7D7-01	0.314822	Other
TCGA-P3-A5Q6-01	0.341636	Other
TCGA-P3-A5QA-01	0.305485	Other
TCGA-P3-A6SX-01	0.324274	Other
TCGA-P3-A6T0-01	0.290346	Other
TCGA-P3-A6T2-01	0.408957	Other
TCGA-P3-A6T3-01	0.289998	Other
TCGA-P3-A6T4-01	0.306807	Other
TCGA-P3-A6T5-01	0.317414	Other
TCGA-P3-A6T7-01	0.367299	Other
TCGA-P3-A6T8-01	0.298297	Other
TCGA-QK-A64Z-01	0.340369	Other
TCGA-QK-A652-01	0.347912	Other
TCGA-QK-A6IF-01	0.344648	B2b
TCGA-QK-A6IG-01	0.314364	Other
TCGA-QK-A6IH-01	0.28966	Other
TCGA-QK-A6II-01	0.357064	Other
TCGA-QK-A6IJ-01	0.306554	Other
TCGA-QK-A6VB-01	0.213989	B1a
TCGA-QK-A6VC-01	0.306883	Other
TCGA-QK-A8Z7-01	0.215347	B2b
TCGA-QK-A8Z8-01	0.230333	B1a
TCGA-QK-A8Z9-01	0.341814	Other
TCGA-QK-A8ZA-01	0.330047	B2b
TCGA-QK-A8ZB-01	0.302691	Other
TCGA-QK-AA3J-01	0.279442	B1a
TCGA-QK-AA3K-01	0.303625	Other
TCGA-RS-A6TO-01	0.305635	Other
TCGA-T2-A6WX-01	0.351428	Other
TCGA-T2-A6WZ-01	0.356417	Other
TCGA-T2-A6X2-01	0.374209	Other
TCGA-T3-A92M-01	0.309588	Other
TCGA-T3-A92N-01	0.370172	Other
TCGA-TN-A7HI-01	0.369343	B2b
TCGA-TN-A7HJ-01	0.320328	Other
TCGA-UF-A718-01	0.321302	Other
TCGA-UF-A719-01	0.246758	B1a
TCGA-UF-A71A-01	0.348351	B2b
TCGA-UF-A71B-01	0.297379	Other
TCGA-UF-A71D-01	0.312428	B1a
TCGA-UF-A71E-01	0.336045	B2b
TCGA-UF-A7J9-01	0.296223	B2b
TCGA-UF-A7JA-01	0.293417	B2b
TCGA-UF-A7JC-01	0.337953	Other
TCGA-UF-A7JD-01	0.276036	B2b
TCGA-UF-A7JF-01	0.302887	B1a
TCGA-UF-A7JH-01	0.293443	B1a
TCGA-UF-A7JJ-01	0.331256	Other
TCGA-UF-A7JK-01	0.318993	Other
TCGA-UF-A7JO-01	0.341121	Other
TCGA-UF-A7JS-01	0.346112	Other
TCGA-UF-A7JT-01	0.343102	Other
TCGA-UF-A7JV-01	0.341124	Other
TCGA-WA-A7GZ-01	0.293076	Other
TCGA-WA-A7H4-01	0.301082	Other

## Sheet: Source Data Fig. 2G
Source data Fig. 2G: Beta values for CpG-probe of UCHL1 gene locus for samples in TCGA-HNSC
Sample ID	Cluster	cg18889780	cg15032098	cg04178266	cg24715245	cg07068756	cg16142306	cg16026922	cg08319991	cg09921610	cg16406708	cg09575242	cg08273672	cg09270434	cg02359506
TCGA-CV-7429-01	Other	0.148186	0.118768	0.0983158	0.175682	0.0156111	0.119655	0.125667	0.0513572	0.160702	0.630335	0.640428	0.748354	0.911482	0.901475
TCGA-KU-A66S-01	B2b	0.247928	0.0550896	0.0812142	0.130799	0.0255239	0.0782339	0.131438	0.0623438	0.0950644	0.661249	0.786997	0.608835	0.910091	0.731865
TCGA-CN-6023-01	B2b		0.156533	0.119109	0.243216	0.019702	0.106184	0.164736	0.0785478	0.174474	0.710433	0.690487	0.549847	0.822014	0.888906
TCGA-BB-8601-01	B2b	0.196267	0.0650921	0.0738552	0.127393	0.0209682	0.112023	0.125604	0.0599812	0.145499	0.765057	0.922416	0.688763	0.901131	0.929404
TCGA-QK-A8Z8-01	B1a	0.225785	0.0556809	0.073097	0.137065	0.0206907	0.0884624	0.109687	0.0446848	0.134551	0.686777	0.888809	0.707931	0.895217	0.91817
TCGA-CV-6960-01	B1a	0.309433	0.065494	0.062573	0.0522484	0.0146269	0.0843448	0.0511872	0.0371135	0.0993954	0.92167	0.956182	0.829517	0.9391	0.939743
TCGA-CV-6962-01	B2b		0.0711321	0.0412087	0.0899408	0.0156093	0.11166	0.0575211	0.0746082	0.091359	0.569813	0.655844	0.551686	0.738404	0.897985
TCGA-CV-7177-01	B2b	0.2439	0.0734109	0.0655262	0.0968183	0.0199294	0.102574	0.104994	0.045144	0.122691	0.765057	0.889219	0.795768	0.928342	0.908511
TCGA-CV-7437-01	B2b	0.150906	0.0642774	0.089223	0.115635	0.0191038	0.097988	0.0722438	0.0616553	0.126972	0.659147	0.676009	0.628356	0.896398	0.900473
TCGA-CN-6997-01	B2b	0.349257	0.101935	0.074761	0.0984911	0.016421	0.104075	0.0776266	0.0549162	0.143904	0.585359	0.630408	0.686366	0.883496	0.918222
TCGA-CN-4727-01	B1a		0.0758602	0.0632064	0.0843731	0.0404346	0.0866099	0.0731798	0.0637289	0.117361	0.612533	0.940836	0.645108	0.927854	0.919296
TCGA-D6-A6EO-01	B1a	0.213153	0.0608171	0.0969846	0.190514	0.032575	0.130178	0.118389	0.0713551	0.143507	0.924663	0.952433	0.776944	0.891694	0.918771
TCGA-CN-6022-01	Other	0.216937	0.150041	0.124284	0.169303	0.0245574	0.104363	0.135363	0.0591842	0.206285	0.736432	0.869025	0.612874	0.727915	0.857016
TCGA-CV-7254-01	B2b	0.235691	0.138483	0.215983	0.308105	0.163286	0.209572	0.281169	0.0476938	0.136396	0.645347	0.798412	0.674054	0.925451	0.921093
TCGA-CV-A6JM-01	Other	0.157118	0.0652098	0.0665002	0.0957704	0.0184095	0.0944308	0.0766636	0.0450387	0.139307	0.824812	0.932335	0.715435	0.880901	0.896543
TCGA-CN-5359-01	Other	0.273123	0.125525	0.140301	0.245517	0.027498	0.13081	0.181125	0.0677097	0.25432	0.878358	0.954885	0.718415	0.902364	0.924984
TCGA-DQ-5631-01	Other	0.250903	0.259432	0.360046	0.399505	0.321107	0.28748	0.377549	0.462371	0.165227	0.95037	0.945087	0.673592	0.941895	0.929986
TCGA-CQ-6228-01	B2b	0.300674	0.0560107	0.0764824	0.108613	0.0196362	0.0755986	0.0700518	0.0486282	0.103789	0.727359	0.941905	0.689236	0.886859	0.872326
TCGA-CV-5441-01	B1a	0.142919	0.0617852	0.100463	0.166378	0.0244614	0.119251	0.142618	0.0614772	0.134707	0.836634	0.948965	0.752425	0.918033	0.935229
TCGA-CV-7418-01	B2b	0.236602	0.0919824	0.0643605	0.1029	0.0149241	0.120568	0.0476461	0.0353056	0.0776711	0.614271	0.719582	0.605255	0.866338	0.835026
TCGA-BA-A4IH-01	B2b	0.339853	0.116184	0.096256	0.108191	0.0227511	0.0933099	0.0484524	0.0684244	0.0993452	0.885876	0.936679	0.700126	0.911133	0.916469
TCGA-CV-7424-01	B2b	0.469	0.432646	0.471754	0.531193	0.511875	0.466775	0.482884	0.323854	0.205328	0.672829	0.801072	0.592744	0.867914	0.873513
TCGA-DQ-5629-01	B2b	0.175297	0.109576	0.154715	0.204731	0.0444726	0.111164	0.168166	0.0694001	0.168792	0.784646	0.892043	0.703052	0.907267	0.894327
TCGA-CV-A461-01	B1a		0.151318	0.135464	0.325893	0.0363304	0.149118	0.313179	0.123348	0.243924	0.862376	0.918121	0.693307	0.852471	0.887094
TCGA-MZ-A5BI-01	B2b	0.257871	0.124565	0.0870728	0.209617	0.0287923	0.115993	0.147122	0.053744	0.102629	0.89602	0.937519	0.612476	0.853022	0.908935
TCGA-CV-5978-01	B2b	0.226321	0.149022	0.107563	0.200498	0.0250724	0.0719134	0.134134	0.0655393	0.234562	0.725546	0.820414	0.671293	0.90633	0.915976
TCGA-CV-A45W-01	B2b		0.130286	0.153964	0.284964	0.0369593	0.0981627	0.259314	0.111279	0.210456	0.783915	0.929138	0.581891	0.848772	0.727995
TCGA-CV-7440-01	B1a	0.182845	0.0790821	0.0480788	0.117849	0.0188686	0.112388	0.0841127	0.0514429	0.11064	0.840143	0.933831	0.756123	0.940337	0.920883
TCGA-CV-5432-01	Other	0.154548	0.117647	0.106226	0.177104	0.0281192	0.125481	0.154497	0.0719063	0.110124	0.926126	0.944044	0.739622	0.916771	0.91455
TCGA-HD-A634-01	B2b	0.445545	0.42328	0.36632	0.466382	0.0180474	0.0825822	0.0526934	0.0482191	0.0647594	0.88885	0.955781	0.772083	0.935583	0.921791
TCGA-QK-A8ZA-01	B2b	0.340676	0.0902949	0.0623012	0.0782389	0.0230104	0.0827828	0.151357	0.04971	0.0444079	0.703964	0.804785	0.757861	0.827673	0.827107
TCGA-QK-A6IG-01	Other	0.621134	0.612291	0.251759	0.435774	0.428425	0.38374	0.414184	0.487754	0.137052	0.935795	0.940891	0.542844	0.80769	0.918971
TCGA-CN-A63W-01	B1a	0.235502	0.0595006	0.0507293	0.0885651	0.0161609	0.0490079	0.0611855	0.0630733	0.122002	0.955473	0.951858	0.790998	0.931062	0.937795
TCGA-BB-8596-01	Other	0.325702	0.174408	0.238658	0.311501	0.0451647	0.156256	0.212573	0.0549688	0.161975	0.895365	0.927954	0.689056	0.915733	0.90156
TCGA-BA-A4IF-01	B1a		0.164058	0.0643304	0.153297	0.0533464	0.0887073	0.091462	0.058518	0.228294	0.931159	0.944035	0.791037	0.885286	0.872454
TCGA-QK-A8Z7-01	B2b	0.366688	0.247124	0.308353	0.34875	0.438623	0.312466	0.327129	0.498673	0.116607	0.671344	0.928138	0.473153	0.788784	0.632389
TCGA-F7-A623-01	Other	0.23396	0.201034	0.0854521	0.151099	0.0225144	0.108481	0.156678	0.0550845	0.129098	0.694996	0.907487	0.644888	0.812386	0.912655
TCGA-CQ-7072-01	B2b	0.188589	0.084394	0.0582445	0.142333	0.024983	0.122652	0.113631	0.0495436	0.2391	0.941015	0.959128	0.754713	0.921526	0.861058
TCGA-CN-4730-01	B1a	0.341237	0.125301	0.0713326	0.149216	0.0205354	0.119861	0.111398	0.0712174	0.0989254	0.939403	0.952689	0.782333	0.934223	0.91704
TCGA-CV-7242-01	B2b	0.268751	0.134086	0.159335	0.310159	0.052068	0.137876	0.254999	0.0685728	0.167044	0.835934	0.934677	0.624225	0.882512	0.905268
TCGA-CN-A63T-01	B1a	0.264172	0.0918477	0.0934431	0.170456	0.0214444	0.0810721	0.154951	0.045394	0.119342	0.78892	0.9407	0.705728	0.910845	0.915709
TCGA-QK-AA3K-01	Other	0.358211	0.162734	0.142688	0.274448	0.0271477	0.0897278	0.243194	0.0812241	0.226781	0.896612	0.941325	0.703527	0.855685	0.881779
TCGA-CV-5436-01	Other	0.272438	0.344204	0.097096	0.176422	0.029487	0.133618	0.152507	0.0686303	0.157772	0.791986	0.936015	0.749175	0.858979	0.879279
TCGA-UF-A7JF-01	B1a	0.237595	0.0878506	0.0911212	0.203876	0.0243466	0.13105	0.149856	0.0767824	0.11686	0.914674	0.926576	0.723581	0.91458	0.921382
TCGA-CN-5360-01	B2b	0.164721	0.150993	0.115376	0.249703	0.0248184	0.124526	0.211462	0.0723554	0.12012	0.806077	0.940957	0.587305	0.914613	0.87384
TCGA-CN-A499-01	Other	0.478924	0.121999	0.113034	0.24559	0.0265263	0.129458	0.192202	0.0628813	0.130846	0.881264	0.954559	0.712932	0.924085	0.935691
TCGA-CV-6933-01	Other	0.241415	0.109385	0.0834256	0.133567	0.0232824	0.0961308	0.128382	0.0618364	0.105852	0.85726	0.940744	0.751215	0.909233	0.917696
TCGA-UF-A718-01	Other	0.276604	0.352922	0.417684	0.484466	0.475389	0.375336	0.394026	0.0631423	0.115797	0.93619	0.94266	0.623975	0.811191	0.886854
TCGA-IQ-A6SG-01	Other	0.414465	0.153924	0.404486	0.42342	0.530694	0.444696	0.461389	0.0518139	0.0928996	0.88139	0.923889	0.734105	0.879736	0.888612
TCGA-CV-7248-01	B2b	0.357957	0.222785	0.174031	0.317031	0.0384218	0.118138	0.263798	0.0945339	0.162217	0.846443	0.952129	0.611818	0.90091	0.907589
TCGA-UF-A7J9-01	B2b	0.231335	0.0872157	0.0876711	0.109355	0.0208913	0.126567	0.1181	0.0432686	0.166005	0.849907	0.886542	0.543842	0.830164	0.752535
TCGA-P3-A5Q6-01	Other	0.501195	0.421265	0.420039	0.4536	0.441785	0.317363	0.372354	0.0519024	0.219141	0.915338	0.960846	0.679666	0.882284	0.885489
TCGA-CV-7245-01	B1a	0.367048	0.108662	0.0541849	0.100593	0.0146677	0.11633	0.0893901	0.0437785	0.102808	0.921003	0.94988	0.815509	0.938422	0.90184
TCGA-BA-A6DL-01	B1a	0.248867	0.118454	0.118256	0.212785	0.0369232	0.120719	0.165888	0.0427838	0.188748	0.897053	0.947765	0.677976	0.902668	0.915775
TCGA-CV-6951-01	Other		0.221824	0.164673	0.443019	0.487224	0.42831	0.462907	0.602445	0.425082	0.810789	0.89914	0.592968	0.909234	0.763452
TCGA-CV-6941-01	B1a	0.18846	0.0864488	0.0608813	0.121989	0.0211846	0.0977049	0.0989166	0.0487023	0.216228	0.907272	0.954978	0.769645	0.921171	0.915777
TCGA-P3-A6T8-01	Other	0.353635	0.253571	0.0724597	0.100383	0.0188719	0.119844	0.0955837	0.0656528	0.140241	0.917863	0.933408	0.740104	0.928987	0.890456
TCGA-D6-6823-01	B1a		0.206703	0.121068	0.268482	0.0155063	0.0748598	0.10752	0.0970454	0.146559	0.944174	0.954819	0.765905	0.923859	0.902571
TCGA-CV-6961-01	B2b		0.125485	0.108213	0.137687	0.0268797	0.0856861	0.0894162	0.058645	0.158308	0.889684	0.941326	0.775359	0.885556	0.888921
TCGA-UF-A7JA-01	B2b	0.202493	0.110117	0.0505195	0.0734067	0.0170674	0.0955139	0.0765914	0.0463479	0.0557524	0.904056	0.918148	0.717713	0.914716	0.840063
TCGA-BB-A5HZ-01	B1a	0.25603	0.0942441	0.0949506	0.143463	0.0189433	0.105775	0.134911	0.0747905	0.197319	0.916675	0.948134	0.747341	0.909503	0.925437
TCGA-CN-6992-01	B2b		0.33776	0.378039	0.457999	0.424899	0.344649	0.330442	0.0708844	0.122437	0.792426	0.80142	0.549324	0.838321	0.59608
TCGA-D6-A6EP-01	B2b	0.241403	0.100831	0.121313	0.180867	0.0706176	0.140317	0.123951	0.0605378	0.0926575	0.888743	0.950858	0.792664	0.886282	0.840588
TCGA-UF-A7JJ-01	Other	0.448537	0.282988	0.290805	0.352722	0.242358	0.212081	0.274891	0.0707019	0.183339	0.900654	0.931025	0.634315	0.877383	0.883893
TCGA-CN-6019-01	B2b	0.302404	0.172287	0.110222	0.266168	0.0210789	0.135749	0.175595	0.0911086	0.257215	0.895844	0.951632	0.706691	0.919111	0.870721
TCGA-CV-A6JU-01	B1a	0.250954	0.133515	0.359812	0.467345	0.0385211	0.101682	0.169771	0.0429034	0.270533	0.943929	0.926607	0.741239	0.902773	0.828791
TCGA-CN-A497-01	B1a	0.240888	0.0982853	0.0948564	0.191749	0.0439342	0.172798	0.215601	0.0645513	0.126627	0.911034	0.943652	0.712399	0.906047	0.903539
TCGA-CV-7432-01	Other	0.187435	0.517381	0.123086	0.359546	0.0210208	0.130665	0.0997763	0.0542895	0.113464	0.916349	0.951751	0.79796	0.941928	0.927672
TCGA-CV-6945-01	Other		0.452814	0.450879	0.465018	0.44878	0.376059	0.297013	0.0751813	0.193819	0.914509	0.958012	0.8131	0.930851	0.911364
TCGA-BA-6872-01	Other	0.541099	0.570036	0.4473	0.487342	0.24812	0.193544	0.238591	0.0729888	0.208575	0.954672	0.950939	0.766052	0.939114	0.942954
TCGA-TN-A7HI-01	B2b	0.679754	0.482105	0.509939	0.540583	0.550402	0.455672	0.491433	0.0628614	0.10579	0.91767	0.931586	0.49379	0.908504	0.919191
TCGA-QK-A8Z9-01	Other	0.369767	0.19252	0.166744	0.230803	0.017908	0.0802365	0.134561	0.0562054	0.127409	0.937788	0.929503	0.708216	0.881938	0.873616
TCGA-CV-7446-01	B2b	0.242209	0.0984303	0.0677686	0.105937	0.0570165	0.0990229	0.113013	0.0534394	0.694757	0.58447	0.698915	0.618732	0.874075	0.880455
TCGA-F7-A61W-01	Other	0.551978	0.511364	0.0695729	0.167929	0.0239719	0.0878505	0.0676439	0.0583602	0.0882996	0.937606	0.95196	0.747804	0.917272	0.880802
TCGA-CN-A641-01	B1a	0.354486	0.0700283	0.064093	0.107317	0.0179381	0.0635928	0.0872124	0.063325	0.0667212	0.936245	0.961506	0.785169	0.906149	0.924223
TCGA-MZ-A7D7-01	Other		0.224781	0.387797	0.409939	0.370699	0.385524	0.305447	0.0581769	0.114384	0.880349	0.95646	0.62565	0.833695	0.899854
TCGA-IQ-A61H-01	B2b	0.448576	0.298853	0.364554	0.462317	0.492815	0.397369	0.392906	0.050406	0.261543	0.823362	0.910255	0.704119	0.905146	0.792183
TCGA-CX-7086-01	Other	0.180868	0.0947017	0.100987	0.172778	0.0166759	0.119161	0.0836999	0.0442957	0.0924656	0.896094	0.940384	0.722606	0.936673	0.920155
TCGA-CN-4735-01	B2b	0.247141	0.125917	0.0672981	0.143502	0.0191981	0.100098	0.0938537	0.0656253	0.107349	0.727191	0.901267	0.724921	0.926803	0.88744
TCGA-CV-7416-01	Other	0.592864	0.528519	0.545707	0.546294	0.572662	0.561541	0.543463	0.142882	0.133721	0.950562	0.950332	0.777107	0.928212	0.836891
TCGA-QK-A6IF-01	B2b	0.291308	0.246232	0.135143	0.244364	0.0418691	0.107801	0.16771	0.095622	0.133943	0.823058	0.937248	0.630939	0.824496	0.926981
TCGA-CN-6024-01	B2b	0.688219	0.643754	0.495569	0.597314	0.544277	0.460719	0.423019	0.0689342	0.19569	0.865688	0.961927	0.792138	0.944682	0.866857
TCGA-CR-7388-01	B2b	0.307428	0.180339	0.163514	0.303499	0.0641618	0.143605	0.285881	0.0980831	0.196376	0.858991	0.927429	0.627721	0.842385	0.903735
TCGA-CN-5370-01	Other	0.311429	0.402298	0.428852	0.492326	0.412526	0.484413	0.503179	0.464615	0.109256	0.926074	0.955527	0.713923	0.916461	0.895696
TCGA-CV-7261-01	B2b	0.521255	0.447733	0.513201	0.536042	0.561226	0.51073	0.465197	0.0606283	0.111574	0.848676	0.937558	0.653651	0.904947	0.909928
TCGA-CV-A465-01	Other		0.418646	0.193026	0.391453	0.0302802	0.113434	0.344463	0.0582326	0.145665	0.893754	0.9314	0.665957	0.860221	0.843565
TCGA-CN-6994-01	Other		0.239906	0.396929	0.419813	0.444	0.432255	0.43865	0.348553	0.100988	0.920691	0.954883	0.75646	0.914842	0.888229
TCGA-CV-5440-01	Other	0.450344	0.419429	0.48341	0.498222	0.0767013	0.206567	0.0985812	0.053203	0.150993	0.847942	0.944823	0.824476	0.919021	0.847712
TCGA-CQ-6227-01	Other	0.256896	0.437338	0.443267	0.499054	0.457997	0.350092	0.429303	0.067422	0.220284	0.925535	0.952	0.685895	0.900097	0.902879
TCGA-BA-6869-01	B1a	0.11922	0.107614	0.102551	0.159962	0.0260325	0.0907682	0.114755	0.0659088	0.1212	0.631154	0.936072	0.718501	0.903934	0.939357
TCGA-D6-A4ZB-01	Other		0.341239	0.411778	0.489746	0.44117	0.375312	0.43434	0.147489	0.231098	0.872685	0.938014	0.67471	0.846531	0.815984
TCGA-CV-A45U-01	B2b	0.264622	0.399589	0.321315	0.390432	0.0183937	0.116605	0.127336	0.0422867	0.143996	0.848483	0.946228	0.676274	0.909885	0.901254
TCGA-CV-7103-01	B2b	0.356925	0.14892	0.0638497	0.158748	0.0196847	0.112867	0.0791945	0.0518798	0.169458	0.77369	0.879533	0.508428	0.791553	0.854711
TCGA-CN-6021-01	B2b	0.551379	0.304385	0.1713	0.296866	0.0342823	0.140432	0.242667	0.0921164	0.153507	0.921488	0.956248	0.680885	0.913396	0.919523
TCGA-F7-7848-01	B1a	0.155959	0.115393	0.125436	0.215663	0.0480037	0.166158	0.167924	0.0686425	0.13866	0.879407	0.926222	0.686386	0.907529	0.912521
TCGA-BA-5152-01	Other	0.354464	0.527935	0.488183	0.53676	0.477424	0.438931	0.504247	0.527177	0.15791	0.946045	0.962256	0.651046	0.911495	0.836888
[truncated: 342 more rows]

[truncated: 11 more sheets: Source data Fig. 3A, Source Data Fig. 3B, Source Data Fig. 3C, Source Data Fig. 3D, Source data Fig. 4A, Source Data Fig. 4B, Source Data Fig. 4C-D, Source Data Fig. 4E, Source Data Fig. 4F, Source data Fig. 4G, Source data Fig. 4H]
