# Supplementary material for: A Novel Subgroup of UCHL1-Related Cancers Is Associated with Genomic Instability and Sensitivity to DNA-Damaging Treatment
Source: Cancers (Basel). 2023 Mar 8;15(6):1655. doi: 10.3390/cancers15061655 (PMC10099714; doi:10.3390/cancers15061655)
Supplement: Supplementary file 1 [file cancers-15-01655-s001.zip › Source data Supplementary Figure.xlsx]

## Sheet: Suppl. Fig S1A-C
Source data Supplementary Fig. S1A-C: UCHL1-related gene set based on DEGs and CEGs for TCGA-HNSC
Gene Symbol	Entrez Gene ID	Cytoband	UCHL1 correlation	Spearman's Correlation	Spearman q-value	log2FC	q-value	Gene Name	OMIM
UCHL1	7345		Positive correlation	1	0	6.09415	1.71979e-152	ubiquitin C-terminal hydrolase L1	191342
CYP26A1	1592	10q23.33	Positive correlation	0.517411	1.78218e-33	5.03061	7.19421e-24	cytochrome P450 family 26 subfamily A member 1	602239
NTS	4922	12q21.31	Positive correlation	0.392268	7.2488e-19	4.62459	5.68163e-13	neurotensin	162650
FREM2	341640	13q13.3	Positive correlation	0.419221	1.44739e-21	3.90255	1.07752e-15	FRAS1 related extracellular matrix 2	608945
PCDH19	57526	Xq22.1	Positive correlation	0.478505	3.19368e-28	3.77629	3.88744e-22	protocadherin 19	300088
PCYT1B	9468	Xp22.11	Positive correlation	0.523499	9.19398e-34	3.65985	1.51404e-26	phosphate cytidylyltransferase 1, choline, beta	300948
POU6F2	11281	7p14.1	Positive correlation	0.368338	1.25542e-16	3.62817	9.32402e-14	POU class 6 homeobox 2	601583
KRT19	3880	17q21.2	Positive correlation	0.348141	6.85984e-15	3.58187	3.1595e-11	keratin 19	148020
GSTA1	2938	6p12.2	Positive correlation	0.321819	8.28462e-13	3.5716	5.01157e-10	glutathione S-transferase alpha 1	138359
WNK2	65268	9q22.31	Positive correlation	0.477437	4.09277e-28	3.55998	3.80124e-19	WNK lysine deficient protein kinase 2	606249
CNNM1	26507	10q24.2	Positive correlation	0.439545	9.00975e-24	3.52626	3.93343e-19	cyclin and CBS domain divalent metal cation transport mediator 1	607802
MYO3A	53904	10p12.1	Positive correlation	0.41291	6.25042e-21	3.50331	3.56456e-14	myosin IIIA	606808
SOHLH1	402381	9q34.3	Positive correlation	0.346289	9.71171e-15	3.35566	3.65865e-11	spermatogenesis and oogenesis specific basic helix-loop-helix 1	610224
COCH	1690	14q12	Positive correlation	0.482386	1.19773e-28	3.34202	2.24595e-22	cochlin	601369
GPC3	2719	Xq26.2	Positive correlation	0.468588	4.10505e-27	3.31997	9.17072e-18	glypican 3	194070
PAK5	57144	20p12.2	Positive correlation	0.395383	3.60811e-19	3.29672	1.15622e-18	p21 (RAC1) activated kinase 5	608038
DMRTA2	63950	1p32.3	Positive correlation	0.329229	2.26825e-13	3.2561	8.39931e-11	DMRT like family A2	614804
LONRF2	164832	2q11.2	Positive correlation	0.455565	1.39133e-25	3.21644	1.78128e-20	LON peptidase N-terminal domain and ring finger 2
UGT1A6	54578	2q37.1	Positive correlation	0.403513	5.70814e-20	3.18938	3.85452e-14	UDP glucuronosyltransferase family 1 member A6	606431
CLEC2L	154790	7q34	Positive correlation	0.369115	1.07301e-16	3.15466	2.26084e-14	C-type lectin domain family 2 member L
UGT8	7368	4q26	Positive correlation	0.374055	3.81322e-17	3.14484	1.92218e-14	UDP glycosyltransferase 8	601291
FGFBP2	83888	4p15.32	Positive correlation	0.356148	1.45803e-15	3.14456	8.9308e-14	fibroblast growth factor binding protein 2	607713
CLDN3	1365	7q11.23	Positive correlation	0.372654	5.1086e-17	3.14379	2.02557e-12	claudin 3	602910
PRDM13	59336	6q16.2	Positive correlation	0.429639	1.10422e-22	3.13905	1.92368e-18	PR/SET domain 13	616741
NPPC	4880	2q37.1	Positive correlation	0.375609	2.72816e-17	3.13515	4.89673e-16	natriuretic peptide C	600296
PRSS21	10942	16p13.3	Positive correlation	0.332579	1.24939e-13	3.10088	1.79928e-11		608159
EPHA7	2045	6q16.1	Positive correlation	0.396067	3.11374e-19	3.09284	1.34617e-14	EPH receptor A7	602190
CSMD1	64478	8p23.2	Positive correlation	0.448118	9.92998e-25	3.05944	4.24126e-15	CUB and Sushi multiple domains 1	608397
LRRN1	57633	3p26.2	Positive correlation	0.431288	7.43627e-23	3.04251	2.45903e-16	leucine rich repeat neuronal 1
NTRK2	4915	9q21.33	Positive correlation	0.431584	7.01615e-23	3.02986	2.88254e-13	neurotrophic receptor tyrosine kinase 2	600456
SHH	6469	7q36.3	Positive correlation	0.435199	2.78947e-23	3.02693	9.17072e-18	sonic hedgehog signaling molecule	142945
KIF1A	547	2q37.3	Positive correlation	0.387981	1.85535e-18	3.02494	2.84665e-14	kinesin family member 1A	201300
TLX3	30012	5q35.1	Positive correlation	0.350249	4.58726e-15	3.00413	5.90103e-10	T cell leukemia homeobox 3	604640
ENPP5	59084	6p21.1	Positive correlation	0.447553	1.14251e-24	3.00133	3.90272e-19	ectonucleotide pyrophosphatase/phosphodiesterase family member 5	617001
MPPED1	758	22q13.2	Positive correlation	0.411106	9.5479e-21	2.97006	1.32871e-13	metallophosphoesterase domain containing 1	602112
HS3ST5	222537	6q21-q22.1	Positive correlation	0.40856	1.74187e-20	2.93845	7.55826e-15	heparan sulfate-glucosamine 3-sulfotransferase 5	609407
MSI1	4440	12q24.31	Positive correlation	0.452385	3.1355e-25	2.93609	6.12049e-20	musashi RNA binding protein 1	603328
RBP4	5950	10q23.33	Positive correlation	0.406293	2.93691e-20	2.93301	5.58282e-16	retinol binding protein 4	180250
GPX2	2877	14q23.3	Positive correlation	0.416716	2.57711e-21	2.93228	2.29708e-14	glutathione peroxidase 2	138319
RBM11	54033	21q11.2	Positive correlation	0.456449	1.12166e-25	2.92796	2.70576e-21	RNA binding motif protein 11	617937
PRKAA2	5563	1p32.2	Positive correlation	0.446148	1.67963e-24	2.9158	2.44198e-17	protein kinase AMP-activated catalytic subunit alpha 2	600497
CACNA1B	774	9q34.3	Positive correlation	0.360211	6.52555e-16	2.89686	1.97697e-13	calcium voltage-gated channel subunit alpha1 B	601012
ARHGEF26	26084	3q25.2	Positive correlation	0.481456	1.52378e-28	2.86997	1.90011e-20	Rho guanine nucleotide exchange factor 26	617552
B4GALNT4	338707	11p15.5	Positive correlation	0.517648	1.78218e-33	2.85833	6.23091e-22	beta-1,4-N-acetyl-galactosaminyltransferase 4
PTH2R	5746	2q34	Positive correlation	0.300758	2.84986e-11	2.85737	1.3205e-09	parathyroid hormone 2 receptor	601469
VWDE	221806	7p21.3	Positive correlation	0.3676	1.46143e-16	2.77875	4.01554e-14	von Willebrand factor D and EGF domains
IGSF11	152404	3q13.32	Positive correlation	0.401644	8.84184e-20	2.77767	3.00035e-16	immunoglobulin superfamily member 11	608351
NGB	58157	14q24.3	Positive correlation	0.335476	7.39722e-14	2.77523	6.51514e-11	neuroglobin	605304
JAKMIP3	282973	10q26.3	Positive correlation	0.472832	1.23846e-27	2.74455	3.43941e-21	Janus kinase and microtubule interacting protein 3	611198
PPP1R1B	84152	17q12	Positive correlation	0.36199	4.55185e-16	2.73727	7.75179e-11	protein phosphatase 1 regulatory inhibitor subunit 1B	604399
PODXL2	50512	3q21.3	Positive correlation	0.455505	1.39331e-25	2.73281	1.88846e-18	podocalyxin like 2	616627
MRAP2	112609	6q14.2	Positive correlation	0.439986	8.15381e-24	2.7293	2.52623e-17	melanocortin 2 receptor accessory protein 2	615410
LINC01018	255167	5p15.31	Positive correlation	0.434173	3.67378e-23	2.72617	2.17173e-17	long intergenic non-protein coding RNA 1018	616385
BEX2	84707	Xq22.2	Positive correlation	0.445797	1.81704e-24	2.72161	1.54469e-19	brain expressed X-linked 2	300691
RPRM	56475	2q23.3	Positive correlation	0.421288	8.91098e-22	2.72011	1.23274e-15	reprimo, TP53 dependent G2 arrest mediator homolog	612171
TEX15	56154	8p12	Positive correlation	0.341681	2.3106e-14	2.71953	4.56386e-11	testis expressed 15, meiosis and synapsis associated	605795
YBX2	51087	17p13.1	Positive correlation	0.37705	1.99633e-17	2.71789	2.53411e-12	Y-box binding protein 2	611447
LINC00626	79100	1q24.2	Positive correlation	0.407239	2.37213e-20	2.7064	1.56584e-16	long intergenic non-protein coding RNA 626
KCNH8	131096	3p24.3	Positive correlation	0.386388	2.63039e-18	2.68434	2.14038e-15	potassium voltage-gated channel subfamily H member 8	608260
FOXJ1	2302	17q25.1	Positive correlation	0.327617	3.01228e-13	2.67274	8.94831e-09	forkhead box J1	602291
KCNG3	170850	2p21	Positive correlation	0.444645	2.45177e-24	2.67236	1.59564e-17	potassium voltage-gated channel modifier subfamily G member 3	606767
MLXIPL	51085	7q11.23	Positive correlation	0.398139	1.96277e-19	2.6649	1.07124e-16	MLX interacting protein like	194050
PNCK	139728	Xq28	Positive correlation	0.394283	4.58161e-19	2.6645	2.09784e-15	pregnancy up-regulated nonubiquitous CaM kinase	300680
ADD2	119	2p13.3	Positive correlation	0.354583	1.98378e-15	2.65989	7.63104e-15	adducin 2	102681
DIPK1C	125704	18q22.3	Positive correlation	0.429005	1.26817e-22	2.65239	2.94864e-14	divergent protein kinase domain 1C	614544
RIMKLA	284716	1p34.2	Positive correlation	0.467691	5.29591e-27	2.64864	9.80909e-19	ribosomal modification protein rimK like family member A
LRP1B	53353	2q22.1-q22.2	Positive correlation	0.417303	2.24173e-21	2.64055	3.72028e-16	LDL receptor related protein 1B	608766
SCN9A	6335	2q24.3	Positive correlation	0.369808	9.27072e-17	2.63973	3.34028e-14	sodium voltage-gated channel alpha subunit 9	133020
DYNC1I1	1780	7q21.3	Positive correlation	0.448336	9.53019e-25	2.63167	5.73876e-20	dynein cytoplasmic 1 intermediate chain 1	603772
IGFBPL1	347252	9p13.1	Positive correlation	0.416668	2.58309e-21	2.61932	2.94405e-17	insulin like growth factor binding protein like 1	610413
ISM2	145501	14q24.3	Positive correlation	0.464442	1.28866e-26	2.61312	1.88512e-18	isthmin 2	612684
RAB3B	5865	1p32.3	Positive correlation	0.33496	8.1106e-14	2.59973	1.1656e-16	RAB3B, member RAS oncogene family	179510
CES1	1066	16q12.2	Positive correlation	0.325616	4.27253e-13	2.58777	4.54434e-08	carboxylesterase 1	114835
POU4F1	5457	13q31.1	Positive correlation	0.331016	1.64355e-13	2.57494	3.61587e-10	POU class 4 homeobox 1	601632
INA	9118	10q24.33	Positive correlation	0.322081	7.90252e-13	2.57065	2.57872e-09	internexin neuronal intermediate filament protein alpha	605338
PCLO	27445	7q21.11	Positive correlation	0.380961	8.56972e-18	2.55584	4.55412e-13	piccolo presynaptic cytomatrix protein	604918
PEG10	23089	7q21.3	Positive correlation	0.345038	1.23587e-14	2.55397	9.21709e-12	paternally expressed 10	609810
GFRA3	2676	5q31.2	Positive correlation	0.407558	2.23254e-20	2.53515	1.9685e-18	GDNF family receptor alpha 3	605710
TMEM151B	441151	6p21.1	Positive correlation	0.348902	5.92994e-15	2.50727	7.61606e-16	transmembrane protein 151B
CBS	875	21q22.3	Positive correlation	0.50633	7.07791e-32	2.50722	2.03812e-15	cystathionine-beta-synthase	236200
ATP13A5	344905	3q29	Positive correlation	0.311918	4.50133e-12	2.50258	1.09133e-08	ATPase 13A5
HIF3A	64344	19q13.32	Positive correlation	0.429405	1.16906e-22	2.50203	4.43711e-16	hypoxia inducible factor 3 subunit alpha	609976
CLGN	1047	4q31.1	Positive correlation	0.42864	1.3724e-22	2.48672	7.32616e-13	calmegin	601858
RND2	8153	17q21.31	Positive correlation	0.508116	4.36441e-32	2.48443	2.1362e-26	Rho family GTPase 2	601555
FGF13	2258	Xq26.3-q27.1	Positive correlation	0.480081	2.13628e-28	2.4759	3.41202e-19	fibroblast growth factor 13	300070
NUDT10	170685	Xp11.22	Positive correlation	0.439848	8.39899e-24	2.47584	1.81567e-17	nudix hydrolase 10	300527
ATRNL1	26033	10q25.3	Positive correlation	0.431907	6.51856e-23	2.45692	1.32138e-15	attractin like 1	612869
NELL1	4745	11p15.1	Positive correlation	0.312369	4.17864e-12	2.45573	4.08755e-11	neural EGFL like 1	602319
GSTM2	2946	1p13.3	Positive correlation	0.375362	2.86271e-17	2.45497	3.72119e-21	glutathione S-transferase mu 2	138380
NPTXR	23467	22q13.1	Positive correlation	0.460045	4.37673e-26	2.45121	1.65381e-21	neuronal pentraxin receptor	609474
MT3	4504	16q13	Positive correlation	0.407063	2.46394e-20	2.44749	3.22561e-16	metallothionein 3	139255
LOC730101	730101	6p12.2	Positive correlation	0.432145	6.15208e-23	2.44172	7.98796e-19	uncharacterized LOC730101
ALDH1A1	216	9q21.13	Positive correlation	0.356264	1.42652e-15	2.44032	8.07809e-11	aldehyde dehydrogenase 1 family member A1	100640
SCUBE3	222663	6p21.31	Positive correlation	0.394132	4.73878e-19	2.43127	1.03457e-13	signal peptide, CUB domain and EGF like domain containing 3	614708
SULT4A1	25830	22q13.31	Positive correlation	0.329316	2.23961e-13	2.42878	2.50453e-10	sulfotransferase family 4A member 1	608359
CILP2	148113	19p13.11	Positive correlation	0.463382	1.74842e-26	2.42566	4.90732e-21	cartilage intermediate layer protein 2	612419
LOXL4	84171	10q24.2	Positive correlation	0.414678	4.12701e-21	2.41749	5.05972e-15	lysyl oxidase like 4	607318
GLB1L2	89944	11q25	Positive correlation	0.411716	8.29741e-21	2.39215	3.29438e-14	galactosidase beta 1 like 2
DLGAP1	9229	18p11.31	Positive correlation	0.357126	1.20167e-15	2.38638	9.67072e-17	DLG associated protein 1	605445
AS3MT	57412	10q24.32	Positive correlation	0.46662	7.03368e-27	2.38616	2.09975e-23	arsenite methyltransferase	611806
SEC14L4	284904	22q12.2	Positive correlation	0.340154	3.06883e-14	2.38534	1.90586e-10	SEC14 like lipid binding 4	612825
MGST1	4257	12p12.3	Positive correlation	0.300164	3.13432e-11	2.38343	6.88343e-08	microsomal glutathione S-transferase 1	138330
SLC9A2	6549	2q12.1	Positive correlation	0.331996	1.38729e-13	2.36651	1.96994e-11	solute carrier family 9 member A2	600530
DPYSL5	56896	2p23.3	Positive correlation	0.360613	6.02824e-16	2.36457	9.29681e-13	dihydropyrimidinase like 5	608383
TMSB15A	11013	Xq22.1	Positive correlation	0.474697	7.79683e-28	2.34247	2.64391e-17	thymosin beta 15a	300939
FTCD	10841	21q22.3	Positive correlation	0.382504	6.15354e-18	2.34166	1.05118e-14	formimidoyltransferase cyclodeaminase	229100
RIMS4	140730	20q13.12	Positive correlation	0.391405	8.69923e-19	2.33595	1.12955e-12	regulating synaptic membrane exocytosis 4	611601
NEXMIF	340533	Xq13.3	Positive correlation	0.380748	8.96481e-18	2.33477	6.70139e-11	neurite extension and migration factor	300524
AFF2	2334	Xq28	Positive correlation	0.391506	8.52263e-19	2.32141	4.74953e-14	AF4/FMR2 family member 2	300806
DEUP1	159989	11q21	Positive correlation	0.39556	3.47636e-19	2.32125	1.11482e-16	deuterosome assembly protein 1	617148
KIAA0319	9856	6p22.3	Positive correlation	0.381784	7.16615e-18	2.31475	2.80981e-14	KIAA0319	609269
NKX2-3	159296	10q24.2	Positive correlation	0.327461	3.09042e-13	2.31208	7.14492e-09	NK2 homeobox 3	606727
ST6GAL2	84620	2q12.3	Positive correlation	0.346347	9.63256e-15	2.31186	1.94096e-11	ST6 beta-galactoside alpha-2,6-sialyltransferase 2	608472
STK33	65975	11p15.4	Positive correlation	0.44278	3.88993e-24	2.31081	7.18399e-18	serine/threonine kinase 33	607670
RAB6B	51560	3q22.1	Positive correlation	0.519018	1.63818e-33	2.3071	8.22359e-22	RAB6B, member RAS oncogene family	615852
SNAP91	9892	6q14.2	Positive correlation	0.403236	6.09972e-20	2.28318	1.59168e-15	synaptosome associated protein 91	607923
PLPPR1	54886	9q31.1	Positive correlation	0.347151	8.26651e-15	2.27896	9.98117e-09	phospholipid phosphatase related 1
ZDHHC2	51201	8p22	Positive correlation	0.519163	1.63818e-33	2.27595	2.70129e-23	zinc finger DHHC-type containing 2
CHDH	55349	3p21.1	Positive correlation	0.460766	3.65967e-26	2.27373	1.57297e-17	choline dehydrogenase
SAMD12	401474	8q24.11-q24.12	Positive correlation	0.418456	1.70574e-21	2.25572	2.7976e-13	sterile alpha motif domain containing 12	601068
ADRA2B	151	2q11.2	Positive correlation	0.392294	7.2249e-19	2.24905	4.25095e-16	adrenoceptor alpha 2B	104260
IGSF10	285313	3q25.1	Positive correlation	0.351297	3.77212e-15	2.23136	1.84295e-11	immunoglobulin superfamily member 10	617351
NLGN1	22871	3q26.31	Positive correlation	0.412473	6.87416e-21	2.21987	1.03952e-13	neuroligin 1	600568
THSD7B	80731	2q22.1	Positive correlation	0.331196	1.59143e-13	2.21622	5.47307e-10	thrombospondin type 1 domain containing 7B
GPR63	81491	6q16.1	Positive correlation	0.422765	6.32176e-22	2.21263	2.12691e-19	G protein-coupled receptor 63	606915
HMX2	3167	10q26.13	Positive correlation	0.355343	1.70917e-15	2.2038	2.08085e-10	H6 family homeobox 2	600647
NUDT11	55190	Xp11.22	Positive correlation	0.410184	1.19107e-20	2.19054	3.48529e-17	nudix hydrolase 11	300528
ABCA17P	650655	16p13.3	Positive correlation	0.405849	3.24045e-20	2.188	8.62055e-11	ATP binding cassette subfamily A member 17, pseudogene
MEGF10	84466	5q23.2	Positive correlation	0.371688	6.28483e-17	2.1813	7.15908e-13	multiple EGF like domains 10	612453
CCDC74B	91409	2q21.1	Positive correlation	0.504768	1.07762e-31	2.17901	4.10955e-23	coiled-coil domain containing 74B
CEL	1056	9q34.13	Positive correlation	0.344649	1.33417e-14	2.17856	2.68163e-10	carboxyl ester lipase	114840
CCSER1	401145	4q22.1	Positive correlation	0.431312	7.43627e-23	2.1755	9.07236e-14	coiled-coil serine rich protein 1
DGKB	1607	7p21.2	Positive correlation	0.410161	1.19287e-20	2.17409	1.22827e-14	diacylglycerol kinase beta	604070
PDIA2	64714	16p13.3	Positive correlation	0.300999	2.73908e-11	2.17365	1.77246e-09	protein disulfide isomerase family A member 2	608012
NRCAM	4897	7q31.1	Positive correlation	0.405054	3.90658e-20	2.16997	2.64457e-15	neuronal cell adhesion molecule	601581
ZNF280A	129025	22q11.22	Positive correlation	0.341982	2.19355e-14	2.16658	1.1765e-10	zinc finger protein 280A
PON3	5446	7q21.3	Positive correlation	0.315986	2.25835e-12	2.16225	1.27645e-10	paraoxonase 3	602720
NRXN3	9369	14q24.3-q31.1	Positive correlation	0.380787	8.90347e-18	2.15718	1.90753e-13	neurexin 3	600567
COLGALT2	23127	1q25.3	Positive correlation	0.373428	4.32743e-17	2.14811	9.75601e-15	collagen beta(1-O)galactosyltransferase 2	617533
CGREF1	10669	2p23.3	Positive correlation	0.412346	7.07379e-21	2.14051	7.10901e-15	cell growth regulator with EF-hand domain 1	606137
WNK3	65267	Xp11.22	Positive correlation	0.39879	1.68101e-19	2.13714	2.35948e-15	WNK lysine deficient protein kinase 3	300358
IRX6	79190	16q12.2	Positive correlation	0.31813	1.56039e-12	2.13608	1.61979e-07	iroquois homeobox 6	606196
ZYG11A	440590	1p32.3	Positive correlation	0.374964	3.12351e-17	2.13496	1.34837e-11	zyg-11 family member A, cell cycle regulator
USH1C	10083	11p15.1	Positive correlation	0.305197	1.37435e-11	2.13115	2.44992e-09	USH1 protein network component harmonin	276900
COLEC11	78989	2p25.3	Positive correlation	0.421487	8.58361e-22	2.13064	1.59841e-18	collectin subfamily member 11	265050
FOXA3	3171	19q13.32	Positive correlation	0.367178	1.58169e-16	2.12267	9.38949e-13	forkhead box A3	602295
GLI2	2736	2q14.2	Positive correlation	0.395562	3.47636e-19	2.11628	5.99644e-15	GLI family zinc finger 2	165230
OGDHL	55753	10q11.23	Positive correlation	0.32352	6.16115e-13	2.11502	8.76708e-11	oxoglutarate dehydrogenase like	617513
SALL2	6297	14q11.2	Positive correlation	0.452806	2.8062e-25	2.1144	1.1549e-21	spalt like transcription factor 2	216820
CACNA2D1	781	7q21.11	Positive correlation	0.385667	3.09934e-18	2.10766	1.9012e-16	calcium voltage-gated channel auxiliary subunit alpha2delta 1	114204
GDF1	2657	19p13.11	Positive correlation	0.421233	8.96333e-22	2.10699	1.61887e-18	growth differentiation factor 1	208530
POMC	5443	2p23.3	Positive correlation	0.399545	1.41197e-19	2.10328	3.47666e-13	proopiomelanocortin	176830
PTCHD1	139411	Xp22.11	Positive correlation	0.428867	1.29851e-22	2.10172	4.85769e-15	patched domain containing 1	300828
DDC	1644	7p12.2-p12.1	Positive correlation	0.369348	1.0222e-16	2.09863	4.75382e-13	dopa decarboxylase	107930
DOC2A	8448	16p11.2	Positive correlation	0.341422	2.4188e-14	2.0985	2.97393e-14	double C2 domain alpha	604567
MLF1	4291	3q25.32	Positive correlation	0.415232	3.6033e-21	2.09381	2.26406e-17	myeloid leukemia factor 1	601402
PDE11A	50940	2q31.2	Positive correlation	0.318386	1.49459e-12	2.09137	1.06531e-10	phosphodiesterase 11A	604961
PANX2	56666	22q13.33	Positive correlation	0.418417	1.71381e-21	2.08006	1.34381e-14	pannexin 2	608421
OCA2	4948	15q12-q13.1	Positive correlation	0.322215	7.71801e-13	2.07864	1.88983e-08	OCA2 melanosomal transmembrane protein	203200
EPCAM	4072	2p21	Positive correlation	0.469602	3.15315e-27	2.07648	1.75537e-18	epithelial cell adhesion molecule	185535
GLS2	27165	12q13.3	Positive correlation	0.397118	2.50283e-19	2.07313	7.89971e-13	glutaminase 2	606365
CAND2	23066	3p25.2	Positive correlation	0.458173	7.15652e-26	2.07298	8.38332e-19	cullin associated and neddylation dissociated 2 (putative)	610403
ULBP1	80329	6q25.1	Positive correlation	0.408722	1.6852e-20	2.06962	1.47331e-16	UL16 binding protein 1	605697
PCSK1N	27344	Xp11.23	Positive correlation	0.310703	5.50978e-12	2.06854	2.82208e-10	proprotein convertase subtilisin/kexin type 1 inhibitor	300399
NUPR2	389493	7p11.2	Positive correlation	0.350467	4.40588e-15	2.06808	4.59094e-09	nuclear protein 2, transcriptional regulator
SP9	100131390	2q31.1	Positive correlation	0.343948	1.52057e-14	2.05993	4.29396e-10	Sp9 transcription factor
EMILIN3	90187	20q12	Positive correlation	0.356455	1.37553e-15	2.05116	4.43711e-16	elastin microfibril interfacer 3	608929
PCOLCE2	26577	3q23	Positive correlation	0.336752	5.878e-14	2.04679	5.79505e-11	procollagen C-endopeptidase enhancer 2	607064
FOXD3	27022	1p31.3	Positive correlation	0.400414	1.1663e-19	2.04462	4.1119e-12	forkhead box D3	607836
PPP1R9A	55607	7q21.3	Positive correlation	0.317038	1.88331e-12	2.04422	3.82936e-10	protein phosphatase 1 regulatory subunit 9A	602468
SV2A	9900	1q21.2	Positive correlation	0.469294	3.37768e-27	2.04008	5.31883e-23	synaptic vesicle glycoprotein 2A	185860
C1GALT1C1L	728819	2p21	Positive correlation	0.390236	1.12648e-18	2.03858	1.6195e-15	C1GALT1 specific chaperone 1 like
NBEA	26960	13q13.3	Positive correlation	0.429919	1.03731e-22	2.03488	2.77543e-18	neurobeachin	604889
TCF15	6939	20p13	Positive correlation	0.330142	1.92724e-13	2.03355	4.74721e-11	transcription factor 15	601010
KCNH1	3756	1q32.2	Positive correlation	0.343143	1.76122e-14	2.03327	8.94248e-11	potassium voltage-gated channel subfamily H member 1	135500
GSTM3	2947	1p13.3	Positive correlation	0.357709	1.06987e-15	2.03268	1.71875e-11	glutathione S-transferase mu 3	138390
STXBP6	29091	14q12	Positive correlation	0.325728	4.19274e-13	2.03003	1.94343e-11	syntaxin binding protein 6	607958
FRAS1	80144	4q21.21	Positive correlation	0.399278	1.49878e-19	2.02673	3.71598e-15	Fraser extracellular matrix complex subunit 1	219000
CLCNKB	1188	1p36.13	Positive correlation	0.40525	3.74533e-20	2.02109	6.10916e-16	chloride voltage-gated channel Kb	602023
TCAM1P	146771	17q23.3	Positive correlation	0.321701	8.44326e-13	2.02027	1.54813e-06	testicular cell adhesion molecule 1, pseudogene
TBX4	9496	17q23.2	Positive correlation	0.3364	6.26445e-14	2.01771	5.02271e-11	T-box 4	147891
ABCA13	154664	7p12.3	Positive correlation	0.344349	1.40696e-14	2.00529	8.76909e-09	ATP binding cassette subfamily A member 13	607807
CDO1	1036	5q22.3	Positive correlation	0.33622	6.46237e-14	1.9998	2.02765e-12	cysteine dioxygenase type 1	603943
SSTR5	6755	16p13.3	Positive correlation	0.346617	9.15475e-15	1.9988	2.95143e-09	somatostatin receptor 5	182455
DLX6	1750	7q21.3	Positive correlation	0.392052	7.61892e-19	1.99704	6.32479e-13	distal-less homeobox 6	600030
SCN2A	6326	2q24.3	Positive correlation	0.307571	9.31851e-12	1.99471	2.52603e-07	sodium voltage-gated channel alpha subunit 2	182390
SMIM10L2A	399668	Xq26.3	Positive correlation	0.401689	8.77441e-20	1.98994	3.23159e-16	small integral membrane protein 10 like 2A
NKX6-1	4825	4q21.23	Positive correlation	0.34853	6.37607e-15	1.97638	6.75769e-14	NK6 homeobox 1	602563
SSTR5-AS1	146336	16p13.3	Positive correlation	0.309646	6.58549e-12	1.97577	4.36588e-08	SSTR5 antisense RNA 1
RASSF9	9182	12q21.31	Positive correlation	0.375781	2.63994e-17	1.97285	5.14334e-12	Ras association domain family member 9	610383
TSPAN7	7102	Xp11.4	Positive correlation	0.409402	1.42619e-20	1.97233	2.01988e-12	tetraspanin 7	300096
RIPPLY3	53820	21q22.13	Positive correlation	0.318746	1.40402e-12	1.96985	3.23566e-09	ripply transcriptional repressor 3	609892
PKDCC	91461	2p21	Positive correlation	0.372107	5.73746e-17	1.96706	1.20192e-10	protein kinase domain containing, cytoplasmic	614150
GAP43	2596	3q13.31	Positive correlation	0.33345	1.07505e-13	1.96677	2.946e-10	growth associated protein 43	162060
PKD1L2	114780	16q23.2	Positive correlation	0.402474	7.2815e-20	1.96497	1.39884e-13	polycystin 1 like 2 (gene/pseudogene)	607894
ARFGEF3	57221	6q23.3-q24.1	Positive correlation	0.366424	1.84733e-16	1.96441	8.22333e-14	ARFGEF family member 3	617411
SYNDIG1	79953	20p11.21	Positive correlation	0.350401	4.46168e-15	1.96107	1.67832e-10	synapse differentiation inducing 1	614311
ROBO2	6092	3p12.3	Positive correlation	0.306717	1.07229e-11	1.96052	6.53843e-08	roundabout guidance receptor 2	602431
SBK1	388228	16p12.1	Positive correlation	0.418859	1.5669e-21	1.95964	2.58214e-14	SH3 domain binding kinase 1
SLITRK5	26050	13q31.2	Positive correlation	0.335943	6.79776e-14	1.95808	3.94675e-08	SLIT and NTRK like family member 5	609680
PNMT	5409	17q12	Positive correlation	0.345947	1.03858e-14	1.95388	4.56386e-11	phenylethanolamine N-methyltransferase	171190
TCEAL2	140597	Xq22.1	Positive correlation	0.344244	1.43601e-14	1.95351	1.66231e-10	transcription elongation factor A like 2
RANBP17	64901	5q35.1	Positive correlation	0.373541	4.23458e-17	1.95233	1.18285e-10	RAN binding protein 17	606141
SEMA3E	9723	7q21.11	Positive correlation	0.311901	4.51184e-12	1.95206	4.31168e-09	semaphorin 3E	146110
OXGR1	27199	13q32.1	Positive correlation	0.331793	1.43515e-13	1.94718	8.55012e-09	oxoglutarate receptor 1	606922
GRIK2	2898	6q16.3	Positive correlation	0.354147	2.15823e-15	1.94663	9.70909e-10	glutamate ionotropic receptor kainate type subunit 2	138244
PCDHB6	56130	5q31.3	Positive correlation	0.304311	1.589e-11	1.94488	1.12148e-09	protocadherin beta 6	606332
PALM3	342979	19p13.12	Positive correlation	0.420024	1.18848e-21	1.94269	3.6321e-16	paralemmin 3
PIANP	196500	12p13.31	Positive correlation	0.384431	3.99034e-18	1.93591	8.18048e-15	PILR alpha associated neural protein	616065
BEX5	340542	Xq22.1	Positive correlation	0.351856	3.3888e-15	1.93156	7.08632e-12	brain expressed X-linked 5	300693
XKR5	389610	8p23.1	Positive correlation	0.368575	1.19955e-16	1.93114	3.8808e-12	XK related 5
EMID1	129080	22q12.2	Positive correlation	0.422552	6.65219e-22	1.93035	9.80373e-17	EMI domain containing 1	608926
STOX1	219736	10q22.1	Positive correlation	0.331023	1.64294e-13	1.93023	3.16623e-12	storkhead box 1	609397
AMOT	154796	Xq23	Positive correlation	0.362335	4.24185e-16	1.92911	7.53638e-11	angiomotin	300410
BEX1	55859	Xq22.1|Xq22	Positive correlation	0.304592	1.51644e-11	1.92448	6.71717e-10	brain expressed X-linked 1	300690
MPPED2	744	11p14.1	Positive correlation	0.359998	6.80177e-16	1.91647	6.36084e-10	metallophosphoesterase domain containing 2	600911
SOX5	6660	12p12.1	Positive correlation	0.384195	4.19891e-18	1.91448	7.87157e-16	SRY-box 5	604975
NAP1L2	4674	Xq13.2	Positive correlation	0.310474	5.72337e-12	1.90081	5.19993e-10	nucleosome assembly protein 1 like 2	300026
MAFA	389692	8q24.3	Positive correlation	0.306728	1.07163e-11	1.89645	1.63549e-12	MAF bZIP transcription factor A	147630
DMRT3	58524	9p24.3	Positive correlation	0.324146	5.5154e-13	1.89288	3.66683e-10	doublesex and mab-3 related transcription factor 3	614754
FBN3	84467	19p13.2	Positive correlation	0.344353	1.40696e-14	1.89223	9.15415e-08	fibrillin 3	608529
CHGA	1113	14q32.12	Positive correlation	0.325184	4.61761e-13	1.89074	1.94668e-09	chromogranin A	118910
CCDC74A	90557	2q21.1	Positive correlation	0.504437	1.07762e-31	1.88827	3.55423e-21	coiled-coil domain containing 74A
GCNT2	2651	6p24.3-p24.2	Positive correlation	0.420139	1.16621e-21	1.8855	5.37409e-15	glucosaminyl (N-acetyl) transferase 2 (I blood group)	110800
BRSK2	9024	11p15.5	Positive correlation	0.381558	7.50309e-18	1.8841	2.94497e-15	BR serine/threonine kinase 2	609236
TSPAN8	7103	12q21.1	Positive correlation	0.302553	2.12974e-11	1.883	2.88475e-07	tetraspanin 8	600769
SCN5A	6331	3p22.2	Positive correlation	0.304077	1.65187e-11	1.88036	3.3125e-10	sodium voltage-gated channel alpha subunit 5	113900
FXYD6	53826	11q23.3	Positive correlation	0.418894	1.56118e-21	1.87883	2.94438e-14	FXYD domain containing ion transport regulator 6	606683
ACADL	33	2q34	Positive correlation	0.307859	8.9111e-12	1.87586	4.56336e-10	acyl-CoA dehydrogenase long chain	609576
SYCP2	10388	20q13.33	Positive correlation	0.359767	7.11745e-16	1.87341	3.51249e-09	synaptonemal complex protein 2	604105
ADCY5	111	3q21.1	Positive correlation	0.405064	3.90658e-20	1.87073	1.25173e-14	adenylate cyclase 5	600293
PYGO1	26108	15q21.3	Positive correlation	0.362554	4.06311e-16	1.8685	1.05482e-16	pygopus family PHD finger 1	606902
ADGRL3	23284	4q13.1	Positive correlation	0.351123	3.90227e-15	1.86603	9.08859e-11	adhesion G protein-coupled receptor L3	616417
KLHDC8A	55220	1q32.1	Positive correlation	0.416394	2.76258e-21	1.86379	2.98333e-14	kelch domain containing 8A	614503
ARMCX2	9823	Xq22.1	Positive correlation	0.476286	5.23834e-28	1.8624	1.261e-22	armadillo repeat containing X-linked 2	300363
GRB14	2888	2q24.3	Positive correlation	0.397668	2.19864e-19	1.85949	2.01409e-12	growth factor receptor bound protein 14	601524
NAT8L	339983	4p16.3	Positive correlation	0.383749	4.64332e-18	1.85632	1.81088e-13	N-acetyltransferase 8 like	610647
CASKIN1	57524	16p13.3	Positive correlation	0.362706	3.94329e-16	1.85326	4.87735e-13	CASK interacting protein 1	612184
CPEB1	64506	15q25.2	Positive correlation	0.395128	3.81741e-19	1.84997	1.99167e-14	cytoplasmic polyadenylation element binding protein 1	607342
TRO	7216	Xp11.21	Positive correlation	0.44863	8.88787e-25	1.84576	4.14841e-20	trophinin	300132
BEND5	79656	1p33	Positive correlation	0.414365	4.45843e-21	1.8454	4.18647e-15	BEN domain containing 5
VWA5B2	90113	3q27.1	Positive correlation	0.439533	9.00975e-24	1.84513	2.86387e-17	von Willebrand factor A domain containing 5B2
LHFPL1	340596	Xq23	Positive correlation	0.332377	1.29747e-13	1.84016	5.71643e-11	LHFPL tetraspan subfamily member 1	300566
JPH3	57338	16q24.2	Positive correlation	0.32569	4.22016e-13	1.83871	3.65545e-10	junctophilin 3	605268
TSPY26P	128854	20q11.21	Positive correlation	0.410761	1.03944e-20	1.83697	1.18484e-24	testis specific protein Y-linked 26, pseudogene
ZNF280B	140883	22q11.22	Positive correlation	0.314908	2.71723e-12	1.83503	1.79713e-12	zinc finger protein 280B
NOVA1	4857	14q12	Positive correlation	0.37997	1.06024e-17	1.83232	4.94362e-14	NOVA alternative splicing regulator 1	602157
SYNE4	163183	19q13.12	Positive correlation	0.331689	1.46178e-13	1.83218	1.19733e-09	spectrin repeat containing nuclear envelope family member 4	615535
KLHL23	151230	2q31.1	Positive correlation	0.413963	4.87092e-21	1.83064	4.61236e-22	kelch like family member 23
MAATS1	89876	3q13.33	Positive correlation	0.331453	1.52211e-13	1.82793	4.78268e-10	MYCBP associated and testis expressed 1	609910
OSR1	130497	2p24.1	Positive correlation	0.403075	6.32841e-20	1.82543	3.09269e-16	odd-skipped related transcription factor 1	608891
KLHDC9	126823	1q23.3	Positive correlation	0.39177	8.0397e-19	1.82459	2.78697e-15	kelch domain containing 9	617375
DGKG	1608	3q27.2-q27.3	Positive correlation	0.375933	2.5545e-17	1.81815	3.4003e-14	diacylglycerol kinase gamma	601854
GNAZ	2781	22q11.22-q11.23	Positive correlation	0.445687	1.85375e-24	1.81763	3.14342e-17	G protein subunit alpha z	139160
SLC29A4	222962	7p22.1	Positive correlation	0.409488	1.40695e-20	1.81727	1.50055e-16	solute carrier family 29 member 4	609149
KCNB2	9312	8q21.11	Positive correlation	0.30107	2.71018e-11	1.81366	7.49721e-08	potassium voltage-gated channel subfamily B member 2	607738
FAM184B	27146	4p15.32-p15.31	Positive correlation	0.471265	1.91825e-27	1.81207	1.72945e-15	family with sequence similarity 184 member B
SLC10A4	201780	4p11	Positive correlation	0.330422	1.83921e-13	1.81131	3.18554e-09	solute carrier family 10 member 4
FSTL4	23105	5q31.1	Positive correlation	0.377865	1.68325e-17	1.80877	1.20449e-09	follistatin like 4
TMEM108	66000	3q22.1	Positive correlation	0.364625	2.66546e-16	1.80448	3.63313e-14	transmembrane protein 108	617361
FADS2	9415	11q12.2	Positive correlation	0.495582	2.1259e-30	1.80391	8.55074e-20	fatty acid desaturase 2	606149
VPS37D	155382	7q11.23	Positive correlation	0.421085	9.21449e-22	1.80103	3.26662e-18	VPS37D subunit of ESCRT-I	610039
ERICH5	203111	8q22.2	Positive correlation	0.301726	2.43821e-11	1.79575	6.58987e-09	glutamate rich 5
NAALADL2	254827	3q26.31	Positive correlation	0.387243	2.17885e-18	1.78815	2.43082e-14	N-acetylated alpha-linked acidic dipeptidase like 2	608806
MPP2	4355	17q21.31	Positive correlation	0.409715	1.33289e-20	1.78329	1.10371e-16	membrane palmitoylated protein 2	600723
TMEM35A	59353	Xq22.1	Positive correlation	0.358445	9.30024e-16	1.78211	3.4352e-11	transmembrane protein 35A
SLC16A14	151473	2q36.3	Positive correlation	0.457822	7.67297e-26	1.78089	4.23157e-19	solute carrier family 16 member 14
SLC16A8	23539	22q13.1	Positive correlation	0.41773	2.01257e-21	1.77403	3.3319e-14	solute carrier family 16 member 8	610409
TMEM200C	645369	18p11.31	Positive correlation	0.346708	9.01797e-15	1.77352	2.0426e-11	transmembrane protein 200C
PLCB4	5332	20p12.3-p12.2	Positive correlation	0.352164	3.19442e-15	1.77033	5.74836e-12	phospholipase C beta 4	600810
ART5	116969	11p15.4	Positive correlation	0.347653	7.54383e-15	1.76915	5.20164e-11	ADP-ribosyltransferase 5	610625
ZNF239	8187	10q11.21	Positive correlation	0.454836	1.64971e-25	1.76729	3.95978e-20	zinc finger protein 239	601069
DNAJC22	79962	12q13.12	Positive correlation	0.360469	6.1995e-16	1.76501	8.95492e-13	DnaJ heat shock protein family (Hsp40) member C22
ENHO	375704	9p13.3	Positive correlation	0.378836	1.36193e-17	1.76347	7.74742e-12	energy homeostasis associated
RASL10B	91608	17q12	Positive correlation	0.442006	4.7108e-24	1.76243	2.38401e-20	RAS like family 10 member B	612128
GYG2	8908	Xp22.33	Positive correlation	0.432972	4.96729e-23	1.75477	1.23494e-17	glycogenin 2	300198
DTNA	1837	18q12.1	Positive correlation	0.356257	1.42652e-15	1.75345	2.52328e-11	dystrobrevin alpha	601239
STAG3	10734	7q22.1	Positive correlation	0.311997	4.44386e-12	1.75027	3.74329e-10	stromal antigen 3	608489
SLC25A48	153328	5q31.1	Positive correlation	0.310456	5.73782e-12	1.74979	1.86487e-08	solute carrier family 25 member 48	616150
ZNF853	54753	7p22.1	Positive correlation	0.406225	2.96768e-20	1.74723	4.07978e-16	zinc finger protein 853
TAS1R1	80835	1p36.31	Positive correlation	0.351485	3.64582e-15	1.74672	1.0989e-10	taste 1 receptor member 1	606225
HHIP	64399	4q31.21	Positive correlation	0.315725	2.35591e-12	1.74286	9.1218e-08	hedgehog interacting protein	606178
FAXC	84553	6q16.2	Positive correlation	0.366536	1.80945e-16	1.74106	2.41243e-11	failed axon connections homolog, metaxin like GST domain containing
TSPAN18	90139	11p11.2	Positive correlation	0.394397	4.48301e-19	1.73937	5.85726e-14	tetraspanin 18
CLDN20	49861	6q25.3	Positive correlation	0.321075	9.39547e-13	1.73761	2.47437e-09	claudin 20
SMIM24	284422	19p13.3	Positive correlation	0.319501	1.23329e-12	1.73691	3.96381e-12	small integral membrane protein 24
SIX4	51804	14q23.1	Positive correlation	0.464913	1.13992e-26	1.73556	1.23357e-20	SIX homeobox 4	606342
GPRC5B	51704	16p12.3	Positive correlation	0.453187	2.54175e-25	1.73493	1.36132e-18	G protein-coupled receptor class C group 5 member B	605948
KRT8	3856	12q13.13	Positive correlation	0.302258	2.23191e-11	1.73071	5.63695e-08	keratin 8	118900
HPDL	84842	1p34.1	Positive correlation	0.358207	9.77495e-16	1.72954	3.6444e-12	4-hydroxyphenylpyruvate dioxygenase like
KRTCAP3	200634	2p23.3	Positive correlation	0.328907	2.39876e-13	1.72917	3.39126e-11	keratinocyte associated protein 3
SLC30A3	7781	2p23.3	Positive correlation	0.3408	2.71958e-14	1.72761	3.11782e-12	solute carrier family 30 member 3	602878
ARNT2	9915	15q25.1	Positive correlation	0.402603	7.07584e-20	1.72744	2.30796e-12	aryl hydrocarbon receptor nuclear translocator 2	606036
PRKD1	5587	14q12	Positive correlation	0.429004	1.26817e-22	1.72449	2.17443e-18	protein kinase D1	605435
COL21A1	81578	6p12.1|6p12.3-p11.2	Positive correlation	0.318838	1.38322e-12	1.72255	1.94737e-08	collagen type XXI alpha 1 chain	610002
SEMA3D	223117	7q21.11	Positive correlation	0.306055	1.19179e-11	1.71984	3.50511e-08	semaphorin 3D	609907
MAP9	79884	4q32.1	Positive correlation	0.352799	2.81497e-15	1.7195	5.63846e-14	microtubule associated protein 9	610070
CHST10	9486	2q11.2	Positive correlation	0.43791	1.38913e-23	1.71937	1.57113e-19	carbohydrate sulfotransferase 10	606376
SCML2	10389	Xp22.13	Positive correlation	0.369904	9.09111e-17	1.71773	6.66948e-15	Scm polycomb group protein like 2	300208
FEZF1	389549	7q31.32	Positive correlation	0.303555	1.80023e-11	1.71661	8.4612e-06	FEZ family zinc finger 1	146110
NRXN1	9378	2p16.3	Positive correlation	0.316811	1.95387e-12	1.71619	1.52502e-07	neurexin 1	600565
ZNF793	390927	19q13.12	Positive correlation	0.351326	3.76006e-15	1.71503	1.66723e-11	zinc finger protein 793
PLAAT1	57110	3q29	Positive correlation	0.332404	1.29201e-13	1.71416	5.63695e-08	phospholipase A and acyltransferase 1	606487
GABRB2	2561	5q34	Positive correlation	0.312046	4.41059e-12	1.71224	4.44553e-08	gamma-aminobutyric acid type A receptor beta2 subunit	600232
NKX3-2	579	4p15.33	Positive correlation	0.325857	4.10124e-13	1.7117	1.33587e-10	NK3 homeobox 2	602183
CDKL2	8999	4q21.1	Positive correlation	0.327232	3.20943e-13	1.71149	3.37508e-10	cyclin dependent kinase like 2	603442
TUB	7275	11p15.4	Positive correlation	0.415498	3.39349e-21	1.71046	1.05535e-15	TUB bipartite transcription factor	601197
PPM1H	57460	12q14.1-q14.2	Positive correlation	0.406689	2.68953e-20	1.70716	1.12787e-14	protein phosphatase, Mg2+/Mn2+ dependent 1H	616016
NSUN7	79730	4p14	Positive correlation	0.365922	2.03937e-16	1.70582	5.04729e-11	NOP2/Sun RNA methyltransferase family member 7	617185
SRSF12	135295	6q15	Positive correlation	0.377132	1.96312e-17	1.70538	1.25669e-12	serine and arginine rich splicing factor 12
CIART	148523	1q21.2	Positive correlation	0.408615	1.72473e-20	1.70524	1.20986e-16	circadian associated repressor of transcription	615782
SLC7A2	6542	8p22	Positive correlation	0.352936	2.74367e-15	1.70355	7.37595e-10	solute carrier family 7 member 2	601872
NUDT16P1	152195	3q22.1	Positive correlation	0.367431	1.50905e-16	1.70233	2.71259e-13	nudix hydrolase 16 pseudogene 1
FNDC5	252995	1p35.1	Positive correlation	0.376855	2.08029e-17	1.70225	3.14276e-12	fibronectin type III domain containing 5	611906
KSR2	283455	12q24.22-q24.23	Positive correlation	0.368954	1.10825e-16	1.70093	1.26308e-11	kinase suppressor of ras 2	610737
TMEM163	81615	2q21.3	Positive correlation	0.36643	1.84733e-16	1.70009	3.62961e-15	transmembrane protein 163
SOX2	6657	3q26.33	Positive correlation	0.328963	2.38395e-13	1.69993	1.63105e-07	SRY-box 2	184429
MAPK4	5596	18q21.1-q21.2	Positive correlation	0.308675	7.79482e-12	1.69816	6.69605e-08	mitogen-activated protein kinase 4	176949
ELN	2006	7q11.23	Positive correlation	0.325207	4.60101e-13	1.69349	6.06111e-08	elastin	123700
MICU3	286097	8p22	Positive correlation	0.395852	3.25553e-19	1.69251	7.07054e-17	mitochondrial calcium uptake family member 3	610633
REEP2	51308	5q31.2	Positive correlation	0.467335	5.7687e-27	1.69238	3.5329e-19	receptor accessory protein 2	609347
AARD	441376	8q24.11	Positive correlation	0.324806	4.91607e-13	1.69114	4.54001e-10	alanine and arginine rich domain containing protein
FZD7	8324	2q33.1	Positive correlation	0.458571	6.46337e-26	1.69089	2.79163e-17	frizzled class receptor 7	603410
GPLD1	2822	6p22.3	Positive correlation	0.338359	4.34663e-14	1.6902	1.68453e-12	glycosylphosphatidylinositol specific phospholipase D1	602515
NOTUM	147111	17q25.3	Positive correlation	0.394786	4.10652e-19	1.68839	6.78771e-13	notum, palmitoleoyl-protein carboxylesterase	609847
KIAA1324	57535	1p13.3	Positive correlation	0.328713	2.48381e-13	1.68313	5.53179e-09	KIAA1324	611298
ISYNA1	51477	19p13.11	Positive correlation	0.457912	7.6051e-26	1.68144	2.62944e-18	inositol-3-phosphate synthase 1	611670
CNKSR2	22866	Xp22.12	Positive correlation	0.307266	9.79153e-12	1.68043	1.89181e-10	connector enhancer of kinase suppressor of Ras 2	300724
DCHS2	54798	4q31.3	Positive correlation	0.306426	1.12598e-11	1.68021	2.15699e-08	dachsous cadherin-related 2	612486
PNMA6A	84968	Xq28	Positive correlation	0.415999	3.01889e-21	1.66313	9.04915e-14	PNMA family member 6A	300917
EGF	1950	4q25	Positive correlation	0.32983	2.0406e-13	1.6623	8.87837e-09	epidermal growth factor	131530
CABYR	26256	18q11.2	Positive correlation	0.4554	1.41479e-25	1.66218	1.51847e-17	calcium binding tyrosine phosphorylation regulated	612135
RNF165	494470	18q21.1	Positive correlation	0.336342	6.32362e-14	1.66163	1.31576e-10	ring finger protein 165
ADORA2A-AS1	646023	22q11.23	Positive correlation	0.321794	8.31753e-13	1.66121	1.5433e-09	ADORA2A antisense RNA 1
RCOR2	283248	11q13.1	Positive correlation	0.386582	2.52462e-18	1.66106	1.82744e-14	REST corepressor 2	616019
SLC26A5	375611	7q22.1	Positive correlation	0.404966	3.97968e-20	1.6554	1.09138e-10	solute carrier family 26 member 5	604943
ACBD7	414149	10p13	Positive correlation	0.418656	1.63505e-21	1.65213	7.40554e-11	acyl-CoA binding domain containing 7
TMEM270	135886	7q11.23	Positive correlation	0.30617	1.17231e-11	1.652	7.40848e-08	transmembrane protein 270	612547
COL9A2	1298	1p34.2	Positive correlation	0.430175	9.81199e-23	1.64722	5.62456e-13	collagen type IX alpha 2 chain	120260
SYT3	84258	19q13.33	Positive correlation	0.341431	2.41706e-14	1.64317	2.80836e-10	synaptotagmin 3	600327
RNFT2	84900	12q24.22	Positive correlation	0.409409	1.42619e-20	1.64171	4.21612e-13	ring finger protein, transmembrane 2
ARHGEF33	100271715	2p22.1	Positive correlation	0.391952	7.78274e-19	1.6375	2.70848e-11	Rho guanine nucleotide exchange factor 33
EYA1	2138	8q13.3	Positive correlation	0.318364	1.49843e-12	1.63402	5.80334e-08	EYA transcriptional coactivator and phosphatase 1	113650
CA8	767	8q12.1	Positive correlation	0.303876	1.70748e-11	1.6315	1.1639e-09	carbonic anhydrase 8	114815
PLEKHG4	25894	16q22.1	Positive correlation	0.425283	3.30201e-22	1.63053	3.22561e-16	pleckstrin homology and RhoGEF domain containing G4	609526
HEY1	23462	8q21.13	Positive correlation	0.418694	1.62789e-21	1.62451	1.32622e-14	hes related family bHLH transcription factor with YRPW motif 1	602953
SEPTIN3	55964	22q13.2	Positive correlation	0.409117	1.52856e-20	1.62181	1.04509e-12	septin 3	608314
CNTN4	152330	3p26.3-p26.2	Positive correlation	0.30467	1.49869e-11	1.61865	4.25177e-09	contactin 4	607280
ADAM22	53616	7q21.12	Positive correlation	0.389428	1.34638e-18	1.61414	2.13987e-12	ADAM metallopeptidase domain 22	603709
RNF150	57484	4q31.21	Positive correlation	0.33585	6.90102e-14	1.61202	2.1508e-09	ring finger protein 150
SCUBE2	57758	11p15.4	Positive correlation	0.357131	1.20167e-15	1.6102	7.88307e-12	signal peptide, CUB domain and EGF like domain containing 2	611747
PTN	5764	7q33	Positive correlation	0.328076	2.78479e-13	1.6101	3.47673e-07	pleiotrophin	162095
CSRNP3	80034	2q24.3	Positive correlation	0.310966	5.26735e-12	1.60975	2.13699e-13	cysteine and serine rich nuclear protein 3
RPS6KL1	83694	14q24.3	Positive correlation	0.420946	9.45009e-22	1.60876	4.33587e-15	ribosomal protein S6 kinase like 1
VEGFD	2277	Xp22.2	Positive correlation	0.354066	2.19041e-15	1.60609	4.28071e-12	vascular endothelial growth factor D	300091
KCNH2	3757	7q36.1	Positive correlation	0.358078	1.00037e-15	1.60517	1.49985e-11	potassium voltage-gated channel subfamily H member 2	152427
NPTX2	4885	7q22.1	Positive correlation	0.351397	3.70896e-15	1.60422	1.35934e-12	neuronal pentraxin 2	600750
LDOC1	23641	Xq27.1	Positive correlation	0.347491	7.74348e-15	1.60368	5.9436e-10	LDOC1 regulator of NFKB signaling	300402
DLL3	10683	19q13.2	Positive correlation	0.313722	3.33314e-12	1.60315	1.25883e-09	delta like canonical Notch ligand 3	277300
B4GALNT1	2583	12q13.3	Positive correlation	0.342441	2.00681e-14	1.60309	3.21196e-13	beta-1,4-N-acetyl-galactosaminyltransferase 1	601873
KCNC3	3748	19q13.33	Positive correlation	0.429258	1.20848e-22	1.60109	6.33466e-19	potassium voltage-gated channel subfamily C member 3	176264
ERC2	26059	3p14.3	Positive correlation	0.357876	1.04009e-15	1.59971	1.17422e-13	ELKS/RAB6-interacting/CAST family member 2	617250
ALKAL2	285016	2p25.3	Positive correlation	0.348493	6.41593e-15	1.59812	3.84322e-09	ALK and LTK ligand 2
PDE6B	5158	4p16.3	Positive correlation	0.358919	8.516e-16	1.59702	1.05751e-11	phosphodiesterase 6B	163500
SLC22A17	51310	14q11.2	Positive correlation	0.475087	7.13479e-28	1.59458	4.02048e-22	solute carrier family 22 member 17	611461
EPDR1	54749	7p14.1	Positive correlation	0.345306	1.17833e-14	1.59265	3.55305e-12	ependymin related 1
MESP1	55897	15q26.1	Positive correlation	0.373746	4.04934e-17	1.59223	7.75724e-11	mesoderm posterior bHLH transcription factor 1	608689
SMC1B	27127	22q13.31	Positive correlation	0.311248	5.01779e-12	1.58916	2.68141e-05	structural maintenance of chromosomes 1B	608685
DCLK1	9201	13q13.3	Positive correlation	0.328941	2.38971e-13	1.5877	8.23545e-09	doublecortin like kinase 1	604742
MYEF2	50804	15q21.1	Positive correlation	0.326694	3.53513e-13	1.58653	9.60878e-13	myelin expression factor 2
KIAA1549	57670	7q34	Positive correlation	0.364967	2.49256e-16	1.58525	1.14479e-12	KIAA1549	613344
GLRB	2743	4q32.1	Positive correlation	0.367529	1.48169e-16	1.58481	4.04388e-12	glycine receptor beta	138492
GPC4	2239	Xq26.2	Positive correlation	0.324864	4.87053e-13	1.58083	2.16865e-08	glypican 4	194070
LTK	4058	15q15.1	Positive correlation	0.353264	2.5664e-15	1.5742	5.76042e-13	leukocyte receptor tyrosine kinase	151520
AXDND1	126859	1q25.2	Positive correlation	0.312024	4.42448e-12	1.57383	3.09528e-09	axonemal dynein light chain domain containing 1
GULP1	51454	2q32.1-q32.2	Positive correlation	0.380145	1.02022e-17	1.57183	1.15991e-11	GULP PTB domain containing engulfment adaptor 1	608165
GSPT2	23708	Xp11.22	Positive correlation	0.381364	7.83403e-18	1.56946	1.92548e-14	G1 to S phase transition 2	300418
INHBE	83729	12q13.3	Positive correlation	0.46518	1.07474e-26	1.5692	4.18737e-15	inhibin subunit beta E	612031
PIP5K1B	8395	9q21.11	Positive correlation	0.326142	3.89649e-13	1.56827	1.34837e-11	phosphatidylinositol-4-phosphate 5-kinase type 1 beta	602745
FGF14	2259	13q33.1	Positive correlation	0.335446	7.43365e-14	1.56782	1.43462e-10	fibroblast growth factor 14	601515
PLEKHG6	55200	12p13.31	Positive correlation	0.377734	1.73129e-17	1.56202	3.37888e-11	pleckstrin homology and RhoGEF domain containing G6	611743
KLF15	28999	3q21.3	Positive correlation	0.349489	5.31538e-15	1.56044	8.52815e-11	Kruppel like factor 15	606465
PNMA8B	57469	19q13.32	Positive correlation	0.412912	6.25042e-21	1.55909	2.59654e-15	PNMA family member 8B
WFIKKN2	124857	17q21.33	Positive correlation	0.314777	2.77135e-12	1.55712	2.21421e-07	WAP, follistatin/kazal, immunoglobulin, kunitz and netrin domain containing 2	610895
FAM171A1	221061	10p13	Positive correlation	0.393084	6.03082e-19	1.55579	1.96965e-13	family with sequence similarity 171 member A1
KCNJ11	3767	11p15.1	Positive correlation	0.366362	1.86243e-16	1.55521	6.16522e-10	potassium voltage-gated channel subfamily J member 11	125853
RADIL	55698	7p22.1	Positive correlation	0.42133	8.89774e-22	1.55407	5.44972e-17	Rap associating with DIL domain	611491
FKBP10	60681	17q21.2	Positive correlation	0.406281	2.93691e-20	1.55385	1.95433e-15	FKBP prolyl isomerase 10	259450
ABCA3	21	16p13.3	Positive correlation	0.379318	1.22572e-17	1.55146	1.52879e-08	ATP binding cassette subfamily A member 3	601615
JPH1	56704	8q21.11	Positive correlation	0.421783	8.02653e-22	1.55056	2.243e-14	junctophilin 1	605266
CRB2	286204	9q33.3	Positive correlation	0.303191	1.91622e-11	1.55042	2.18532e-06	crumbs cell polarity complex component 2	219730
SYN2	6854	3p25.2	Positive correlation	0.337274	5.31659e-14	1.54955	4.39535e-08	synapsin II	181500
ETNK2	55224	1q32.1	Positive correlation	0.420095	1.17289e-21	1.54779	2.22248e-15	ethanolamine kinase 2	609859
ZNF711	7552	Xq21.1	Positive correlation	0.33059	1.78318e-13	1.5469	1.23865e-10	zinc finger protein 711	300803
PLCH1	23007	3q25.31	Positive correlation	0.311869	4.53578e-12	1.54335	2.07956e-09	phospholipase C eta 1	612835
CRISPLD1	83690	8q21.13	Positive correlation	0.357806	1.05102e-15	1.54285	1.18006e-10	cysteine rich secretory protein LCCL domain containing 1
ZNF287	57336	17p11.2	Positive correlation	0.399576	1.4062e-19	1.54216	2.47322e-19	zinc finger protein 287
GGT7	2686	20q11.22	Positive correlation	0.44267	3.97278e-24	1.54215	5.61624e-20	gamma-glutamyltransferase 7	612342
CAPN9	10753	1q42.2	Positive correlation	0.300691	2.87632e-11	1.53839	5.59992e-08	calpain 9	606401
MFSD4A	148808	1q32.1	Positive correlation	0.3062	1.16852e-11	1.5367	3.47728e-07	major facilitator superfamily domain containing 4A
SEZ6L	23544	22q12.1	Positive correlation	0.303602	1.78753e-11	1.53574	2.88973e-07	seizure related 6 homolog like	607021
RARB	5915	3p24.2	Positive correlation	0.333116	1.13762e-13	1.53317	3.58837e-11	retinoic acid receptor beta	180220
PLEKHG4B	153478	5p15.33	Positive correlation	0.306523	1.10734e-11	1.53136	4.56275e-08	pleckstrin homology and RhoGEF domain containing G4B
ARMCX6	54470	Xq22.1	Positive correlation	0.472721	1.24415e-27	1.53101	4.62599e-20	armadillo repeat containing X-linked 6
AADAT	51166	4q33	Positive correlation	0.378901	1.3447e-17	1.53027	3.02668e-13	aminoadipate aminotransferase	611754
CHST6	4166	16q23.1	Positive correlation	0.378087	1.60975e-17	1.52338	5.98999e-11	carbohydrate sulfotransferase 6	217800
GPC2	221914	7q22.1	Positive correlation	0.386783	2.41378e-18	1.51944	1.98048e-14	glypican 2
CACNA2D3	55799	3p21.1-p14.3	Positive correlation	0.41274	6.47253e-21	1.51915	4.43785e-15	calcium voltage-gated channel auxiliary subunit alpha2delta 3	606399
MEST	4232	7q32.2	Positive correlation	0.476501	5.09236e-28	1.51746	2.70129e-23	mesoderm specific transcript	601029
SOWAHA	134548	5q31.1	Positive correlation	0.316143	2.19682e-12	1.51521	5.8576e-09	sosondowah ankyrin repeat domain family member A
MCF2L	23263	13q34	Positive correlation	0.438504	1.19631e-23	1.51282	9.53364e-16	MCF.2 cell line derived transforming sequence like	609499
PRSS35	167681	6q14.2	Positive correlation	0.340529	2.86673e-14	1.51008	8.11488e-10	serine protease 35
PXYLP1	92370	3q23	Positive correlation	0.453576	2.33234e-25	1.50807	7.57621e-18	2-phosphoxylose phosphatase 1
GREB1L	80000	18q11.1-q11.2	Positive correlation	0.307427	9.5312e-12	1.50585	5.51896e-08	GREB1 like retinoic acid receptor coactivator	617782
SPIN3	169981	Xp11.21	Positive correlation	0.326706	3.52993e-13	1.50518	8.16166e-12	spindlin family member 3
RAB9B	51209	Xq22.2	Positive correlation	0.328751	2.4685e-13	1.50386	3.71472e-12	RAB9B, member RAS oncogene family	300285
ARMCX3	51566	Xq22.1	Positive correlation	0.495142	2.24791e-30	1.50346	2.70129e-23	armadillo repeat containing X-linked 3	300364
MAFB	9935	20q12	Negative correlation	-0.348217	6.76959e-15	-1.50359	4.92267e-18	MAF bZIP transcription factor B	166300
SFN	2810	1p36.11	Negative correlation	-0.39179	8.0242e-19	-1.50747	4.95792e-18	stratifin	601290
DSC2	1824	18q12.1	Negative correlation	-0.328255	2.70206e-13	-1.51687	3.25635e-14	desmocollin 2	125645
F3	2152	1p21.3	Negative correlation	-0.328931	2.39219e-13	-1.51865	1.1305e-10	coagulation factor III, tissue factor	134390
FABP5P3	220832	7q36.1	Negative correlation	-0.31294	3.80247e-12	-1.52053	6.41883e-12	fatty acid binding protein 5 pseudogene 3
EPSTI1	94240	13q14.11	Negative correlation	-0.358734	8.80611e-16	-1.52585	3.96291e-14	epithelial stromal interaction 1	607441
PLK2	10769	5q11.2	Negative correlation	-0.444349	2.64106e-24	-1.52792	2.09975e-23	polo like kinase 2	607023
KRT6A	3853	12q13.13	Negative correlation	-0.387676	1.97978e-18	-1.5285	1.74492e-11	keratin 6A	148041
TSPAN10	83882	17q25.3	Negative correlation	-0.349448	5.35434e-15	-1.53002	9.99203e-14	tetraspanin 10
S100A14	57402	1q21.3	Negative correlation	-0.32779	2.92674e-13	-1.53233	6.58663e-14	S100 calcium binding protein A14	607986
PTK6	5753	20q13.33	Negative correlation	-0.375299	2.89864e-17	-1.53746	2.37233e-17	protein tyrosine kinase 6	602004
ALS2CL	259173	3p21.31	Negative correlation	-0.444228	2.7045e-24	-1.53994	1.60305e-21	ALS2 C-terminal like	612402
THBD	7056	20p11.21	Negative correlation	-0.305437	1.32285e-11	-1.56611	4.64619e-14	thrombomodulin	188040
BARX2	8538	11q24.3	Negative correlation	-0.30215	2.27181e-11	-1.58743	8.4156e-09	BARX homeobox 2	604823
VEGFC	7424	4q34.3	Negative correlation	-0.32617	3.8792e-13	-1.592	3.20676e-10	vascular endothelial growth factor C	601528
ADGRF4	221393	6p12.3	Negative correlation	-0.37738	1.86225e-17	-1.60519	2.13206e-13	adhesion G protein-coupled receptor F4	614268
NFE2	4778	12q13.13	Negative correlation	-0.347992	7.06718e-15	-1.64169	2.28835e-12	nuclear factor, erythroid 2	601490
RGS20	8601	8q11.23	Negative correlation	-0.393414	5.59775e-19	-1.64259	1.71534e-12	regulator of G protein signaling 20	607193
TMEM154	201799	4q31.3	Negative correlation	-0.405858	3.24045e-20	-1.64714	1.60305e-21	transmembrane protein 154
SH2D5	400745	1p36.12	Negative correlation	-0.327061	3.30516e-13	-1.65238	1.23743e-08	SH2 domain containing 5
FGFBP1	9982	4p15.32	Negative correlation	-0.321161	9.25942e-13	-1.659	3.3618e-10	fibroblast growth factor binding protein 1	607737
GBP1	2633	1p22.2	Negative correlation	-0.36496	2.49256e-16	-1.66576	3.48135e-16	guanylate binding protein 1	600411
ACKR4	51554	3q22.1	Negative correlation	-0.301982	2.33238e-11	-1.66965	1.25669e-12	atypical chemokine receptor 4	606065
HTR7	3363	10q23.31	Negative correlation	-0.341732	2.28932e-14	-1.71786	5.22772e-09	5-hydroxytryptamine receptor 7	182137
GOLGA7B	401647	10q24.2	Negative correlation	-0.322883	6.8918e-13	-1.72193	1.4663e-09	golgin A7 family member B	614189
ADRB2	154	5q32	Negative correlation	-0.341219	2.51776e-14	-1.73414	2.33001e-13	adrenoceptor beta 2	109690
GSDMC	56169	8q24.21	Negative correlation	-0.369941	9.03258e-17	-1.76939	3.21165e-15	gasdermin C	608384
BATF2	116071	11q13.1	Negative correlation	-0.31386	3.2618e-12	-1.82645	4.32344e-11	basic leucine zipper ATF-like transcription factor 2	614983
CLIC3	9022	9q34.3	Negative correlation	-0.309627	6.60388e-12	-1.85328	4.97832e-13	chloride intracellular channel 3	606533
RNASE7	84659	14q11.2	Negative correlation	-0.310051	6.14115e-12	-1.90618	2.82827e-09	ribonuclease A family member 7	612484
LYPD5	284348	19q13.31	Negative correlation	-0.366377	1.85988e-16	-1.92148	4.62881e-16	LY6/PLAUR domain containing 5
CA2	760	8q21.2	Negative correlation	-0.326593	3.6012e-13	-1.92711	1.19945e-13	carbonic anhydrase 2	259730
SPTLC3	55304	20p12.1	Negative correlation	-0.411668	8.36288e-21	-1.94022	3.34208e-12	serine palmitoyltransferase long chain base subunit 3	611120
SLC28A3	64078	9q21.32-q21.33	Negative correlation	-0.350995	3.99188e-15	-1.9677	6.19154e-18	solute carrier family 28 member 3	608269
GPR78	27201	4p16.1	Negative correlation	-0.359916	6.91334e-16	-1.97248	9.23394e-13	G protein-coupled receptor 78	606921
CYSRT1	375791	9q34.3	Negative correlation	-0.306142	1.1775e-11	-1.98145	1.43989e-12	cysteine rich tail 1
GSDMA	284110	17q21.1	Negative correlation	-0.312572	4.04422e-12	-1.98603	2.64321e-09	gasdermin A	611218
RAET1G	353091	6q25.1	Negative correlation	-0.363642	3.27108e-16	-1.98967	1.30202e-18	retinoic acid early transcript 1G	609244
PGLYRP4	57115	1q21.3	Negative correlation	-0.322367	7.51706e-13	-2.02377	5.29615e-12	peptidoglycan recognition protein 4	608198
SLPI	6590	20q13.12	Negative correlation	-0.318693	1.41446e-12	-2.0302	6.13073e-14	secretory leukocyte peptidase inhibitor	107285
SLC39A2	29986	14q11.2	Negative correlation	-0.350267	4.57583e-15	-2.03587	1.32992e-12	solute carrier family 39 member 2	612166
FABP5	2171	8q21.13	Negative correlation	-0.355333	1.71033e-15	-2.04425	4.67942e-14	fatty acid binding protein 5	605168
RAET1E	135250	6q25.1	Negative correlation	-0.328363	2.64859e-13	-2.05884	4.76174e-14	retinoic acid early transcript 1E	609243
TENT5B	115572	1p36.11	Negative correlation	-0.357361	1.14954e-15	-2.09966	5.27664e-16	terminal nucleotidyltransferase 5B
APOBEC3A	200315	22q13.1	Negative correlation	-0.347656	7.54383e-15	-2.12849	1.47682e-14	apolipoprotein B mRNA editing enzyme catalytic subunit 3A	607109
TGM1	7051	14q12	Negative correlation	-0.314842	2.74525e-12	-2.18922	1.94521e-11	transglutaminase 1	190195
SERPINB2	5055	18q21.33-q22.1	Negative correlation	-0.328079	2.78479e-13	-2.1946	1.94319e-11	serpin family B member 2	173390
KRT14	3861	17q21.2	Negative correlation	-0.419467	1.36328e-21	-2.2201	1.70203e-11	keratin 14	125595
FAM83A-AS1	100131726	8q24.13	Negative correlation	-0.375534	2.76985e-17	-2.22503	7.33652e-16	FAM83A antisense RNA 1
FAM83A	84985	8q24.13	Negative correlation	-0.40011	1.24297e-19	-2.22604	1.1344e-15	family with sequence similarity 83 member A
FLRT3	23767	20p12.1	Negative correlation	-0.314346	2.98957e-12	-2.22681	1.89866e-07	fibronectin leucine rich transmembrane protein 3	146110
IFNK	56832	9p21.2	Negative correlation	-0.363482	3.36568e-16	-2.23685	2.16406e-11	interferon kappa	615326
PDZK1IP1	10158	1p33	Negative correlation	-0.355781	1.57292e-15	-2.31202	9.34313e-16	PDZK1 interacting protein 1	607178
GJB6	10804	13q12.11	Negative correlation	-0.405407	3.61288e-20	-2.34163	2.52365e-12	gap junction protein beta 6	129500
RNF222	643904	17p13.1	Negative correlation	-0.317241	1.82042e-12	-2.35994	6.69319e-12	ring finger protein 222
GJB2	2706	13q12.11	Negative correlation	-0.461705	2.80367e-26	-2.36043	1.20904e-18	gap junction protein beta 2	121011
KRT16	3868	17q21.2	Negative correlation	-0.371237	6.90426e-17	-2.37499	2.25284e-13	keratin 16	148067
NIPAL4	348938	5q33.3	Negative correlation	-0.425992	2.74014e-22	-2.42036	3.84991e-15	NIPA like domain containing 4	609383
DSCAM	1826	21q22.2	Negative correlation	-0.323654	6.02644e-13	-2.44016	2.46346e-10	DS cell adhesion molecule	602523
SLC6A14	11254	Xq23	Negative correlation	-0.303153	1.92787e-11	-2.51009	1.76168e-10	solute carrier family 6 member 14	300444
ARL14	80117	3q25.33	Negative correlation	-0.335291	7.63317e-14	-2.52766	2.36027e-13	ADP ribosylation factor like GTPase 14	614439
AQP3	360	9p13.3	Negative correlation	-0.435363	2.70023e-23	-2.53099	5.73876e-20	aquaporin 3 (Gill blood group)	600170
TRIML2	205860	4q35.2	Negative correlation	-0.327606	3.0162e-13	-2.58981	2.40765e-10	tripartite motif family like 2
EPGN	255324	4q13.3	Negative correlation	-0.326535	3.63828e-13	-2.59174	3.16551e-10	epithelial mitogen
PLA2G2F	64600	1p36.12	Negative correlation	-0.320101	1.11143e-12	-2.60123	6.31453e-11	phospholipase A2 group IIF	616793
HEPHL1	341208	11q21	Negative correlation	-0.354761	1.91838e-15	-2.61322	4.73236e-11	hephaestin like 1
S100A9	6280	1q21.3	Negative correlation	-0.40089	1.04891e-19	-2.64667	6.7902e-19	S100 calcium binding protein A9	123886
CXCL11	6373	4q21.1	Negative correlation	-0.327974	2.82925e-13	-2.64942	1.25786e-10	C-X-C motif chemokine ligand 11	604852
PLA2G4E	123745	15q15.1	Negative correlation	-0.347498	7.74101e-15	-2.6785	6.0034e-14	phospholipase A2 group IVE
LHX1	3975	17q12	Negative correlation	-0.329636	2.11353e-13	-2.68932	1.07535e-10	LIM homeobox 1	601999
KRT6B	3854	12q13.13	Negative correlation	-0.428898	1.29654e-22	-2.73796	5.47062e-18	keratin 6B	148042
SLC6A11	6538	3p25.3	Negative correlation	-0.38301	5.48912e-18	-2.78247	3.14785e-12	solute carrier family 6 member 11	607952
S100A8	6279	1q21.3	Negative correlation	-0.388251	1.7483e-18	-2.81996	3.09196e-18	S100 calcium binding protein A8	123885
S100A7	6278	1q21.3	Negative correlation	-0.306257	1.15823e-11	-2.84897	2.02916e-10	S100 calcium binding protein A7	600353
LCE3E	353145	1q21.3	Negative correlation	-0.302945	1.99623e-11	-2.87198	2.09391e-09	late cornified envelope 3E	612617
CDSN	1041	6p21.33	Negative correlation	-0.305464	1.31747e-11	-2.921	4.77185e-10	corneodesmosin	146520
CRCT1	54544	1q21.3	Negative correlation	-0.320006	1.12886e-12	-2.93272	1.72596e-10	cysteine rich C-terminal 1	617426
DSG1	1828	18q12.1	Negative correlation	-0.333414	1.07922e-13	-3.20521	6.96813e-11	desmoglein 1	125670
KRT6C	286887	12q13.13	Negative correlation	-0.412517	6.82847e-21	-3.62236	6.76438e-18	keratin 6C	612315
CASP14	23581	19p13.12	Negative correlation	-0.361533	5.01425e-16	-4.37254	1.45733e-13	caspase 14	605848

## Sheet: Suppl Fig. S1D
Source data Supplementary Fig. S1D: Summary of gene sets from MSigDB (Hallmarks, C2 and C6) with a significant enrichment for the UCHL1-related gene set by GSEA
Gene set name	Normalized enrichment score	p-value
REACTOME_METAL_SEQUESTRATION_BY_ANTIMICROBIAL_PROTEINS	-2.09898	0.000237023
REACTOME_BIOLOGICAL_OXIDATIONS	2.32864	0.000293126
REACTOME_FORMATION_OF_THE_CORNIFIED_ENVELOPE	-3.10226	0.000306466
REACTOME_INNATE_IMMUNE_SYSTEM	-2.51248	0.000306466
REACTOME_KERATINIZATION	-3.10226	0.000306466
REACTOME_NEUTROPHIL_DEGRANULATION	-2.39411	0.000566733
REACTOME_ANTIMICROBIAL_PEPTIDES	-2.31576	0.000771208
HALLMARK_TNFA_SIGNALING_VIA_NFKB	-2.08254	0.00125219
REACTOME_PHASE_II_CONJUGATION_OF_COMPOUNDS	2.08977	0.00139018
WP_METAPATHWAY_BIOTRANSFORMATION_PHASE_I_AND_II	2.10316	0.00149098
REACTOME_DEVELOPMENTAL_BIOLOGY	-2.1357	0.00186393
REACTOME_CELLULAR_RESPONSES_TO_EXTERNAL_STIMULI	1.93089	0.00199601
PID_TOLL_ENDOGENOUS_PATHWAY	-1.74069	0.00219346
REACTOME_REGULATION_OF_TLR_BY_ENDOGENOUS_LIGAND	-1.74069	0.00219346
REACTOME_RHO_GTPASES_ACTIVATE_NADPH_OXIDASES	-1.74069	0.00219346
REACTOME_TOLL_LIKE_RECEPTOR_CASCADES	-1.74069	0.00219346
WP_VITAMIN_D_RECEPTOR_PATHWAY	-2.22239	0.00219358
KEGG_ETHER_LIPID_METABOLISM	-1.73348	0.00241281
KEGG_FC_EPSILON_RI_SIGNALING_PATHWAY	-1.73348	0.00241281
KEGG_LINOLEIC_ACID_METABOLISM	-1.73348	0.00241281
KEGG_VEGF_SIGNALING_PATHWAY	-1.73348	0.00241281
REACTOME_ACYL_CHAIN_REMODELLING_OF_PC	-1.73348	0.00241281
REACTOME_ACYL_CHAIN_REMODELLING_OF_PI	-1.73348	0.00241281
REACTOME_ACYL_CHAIN_REMODELLING_OF_PS	-1.73348	0.00241281
WP_ESTROGEN_METABOLISM	1.70306	0.00293632
KEGG_PARKINSONS_DISEASE	1.33451	0.00300601
PID_ALPHA_SYNUCLEIN_PATHWAY	1.33451	0.00300601
REACTOME_UCH_PROTEINASES	1.33451	0.00300601
REACTOME_VITAMINS	1.33182	0.00300601
WP_HEPATITIS_C_AND_HEPATOCELLULAR_CARCINOMA	1.33451	0.00300601
WP_OXIDATION_BY_CYTOCHROME_P450	1.33182	0.00300601
WP_PROTEASOME_DEGRADATION	1.33451	0.00300601
REACTOME_NA_CL_DEPENDENT_NEUROTRANSMITTER_TRANSPORTERS	-1.71546	0.0032902
HALLMARK_SPERMATOGENESIS	1.90858	0.00366651
REACTOME_GAP_JUNCTION_ASSEMBLY	-1.69384	0.00438693
REACTOME_GAP_JUNCTION_TRAFFICKING_AND_REGULATION	-1.69384	0.00438693
KEGG_CYTOKINE_CYTOKINE_RECEPTOR_INTERACTION	-2.01462	0.00514139
WP_NEURAL_CREST_CELL_MIGRATION_IN_CANCER	1.66387	0.00587264
WP_22Q112_DELETION_SYNDROME	1.66031	0.00623968
HALLMARK_INTERFERON_ALPHA_RESPONSE	-1.8339	0.00639962
HALLMARK_INTERFERON_GAMMA_RESPONSE	-1.8339	0.00639962
HALLMARK_COAGULATION	-1.8252	0.00734771
WP_GLUTATHIONE_METABOLISM	1.72607	0.00967519
KEGG_RETINOL_METABOLISM	1.70915	0.0108846
PID_TAP63_PATHWAY	1.63181	0.0110112
REACTOME_APOPTOTIC_CLEAVAGE_OF_CELL_ADHESION_PROTEINS	-1.33008	0.0119284
REACTOME_APOPTOTIC_CLEAVAGE_OF_CELLULAR_PROTEINS	-1.33008	0.0119284
REACTOME_APOPTOTIC_EXECUTION_PHASE	-1.33008	0.0119284
WP_SENESCENCE_AND_AUTOPHAGY_IN_CANCER	-1.64699	0.012064
PID_AP1_PATHWAY	1.32913	0.0122244
WP_BRAINDERIVED_NEUROTROPHIC_FACTOR_BDNF_SIGNALING_PATHWAY	1.62468	0.0124794
WP_STEROL_REGULATORY_ELEMENTBINDING_PROTEINS_SREBP_SIGNALLING	1.62468	0.0124794
WP_SYNAPTIC_SIGNALING_PATHWAYS_ASSOCIATED_WITH_AUTISM_SPECTRUM_DISORDER	1.62468	0.0124794
HALLMARK_ESTROGEN_RESPONSE_LATE	-1.89899	0.0130349
REACTOME_POST_TRANSLATIONAL_PROTEIN_MODIFICATION	1.74565	0.0187787
KEGG_DRUG_METABOLISM_CYTOCHROME_P450	1.66319	0.024134
KEGG_METABOLISM_OF_XENOBIOTICS_BY_CYTOCHROME_P450	1.66319	0.024134
REACTOME_SYNTHESIS_OF_PC	1.32105	0.0250501
REACTOME_GOLGI_TO_ER_RETROGRADE_TRANSPORT	1.61608	0.0250518
REACTOME_CHEMOKINE_RECEPTORS_BIND_CHEMOKINES	-1.58212	0.0261022
BIOCARTA_CHREBP_PATHWAY	1.54986	0.0262433
REACTOME_AMPK_INHIBITS_CHREBP_TRANSCRIPTIONAL_ACTIVATION_ACTIVITY	1.54986	0.0262433
WP_NONALCOHOLIC_FATTY_LIVER_DISEASE	1.54986	0.0262433
PID_MYC_REPRESS_PATHWAY	-1.31931	0.0270378
REACTOME_DISORDERS_OF_TRANSMEMBRANE_TRANSPORTERS	-1.6731	0.0291538
WP_VITAMIN_A_AND_CAROTENOID_METABOLISM	1.61548	0.0296075
WP_HAIR_FOLLICLE_DEVELOPMENT_CYTODIFFERENTIATION_PART_3_OF_3	-1.71201	0.0301618
REACTOME_CREATINE_METABOLISM	-1.31392	0.0306163
REACTOME_GABA_SYNTHESIS_RELEASE_REUPTAKE_AND_DEGRADATION	-1.31392	0.0306163
REACTOME_SELECTIVE_AUTOPHAGY	1.52492	0.0317489
REACTOME_TRANSPORT_OF_BILE_SALTS_AND_ORGANIC_ACIDS_METAL_IONS_AND_AMINE_COMPOUNDS	-1.64115	0.0337165
REACTOME_HEME_DEGRADATION	1.31298	0.0364729
REACTOME_METABOLISM_OF_PORPHYRINS	1.31298	0.0364729
WP_FOCAL_ADHESION	-1.63628	0.0368144
KEGG_DRUG_METABOLISM_OTHER_ENZYMES	1.51067	0.0368875
REACTOME_REGULATION_OF_TP53_ACTIVITY	1.5071	0.0376216
WP_NRF2_PATHWAY	1.60747	0.0405898
REACTOME_HYDROLYSIS_OF_LPC	-1.30584	0.0419483
HALLMARK_PEROXISOME	1.54839	0.042329
WP_FOLATE_METABOLISM	1.48573	0.0453294
WP_SELENIUM_MICRONUTRIENT_NETWORK	1.48573	0.0453294
WP_BREAST_CANCER_PATHWAY	-1.59661	0.0460806
KEGG_TOLL_LIKE_RECEPTOR_SIGNALING_PATHWAY	-1.30315	0.0487078
WP_ALLOGRAFT_REJECTION	-1.30315	0.0487078
WP_REGULATION_OF_TOLLLIKE_RECEPTOR_SIGNALING_PATHWAY	-1.30315	0.0487078
WP_TOLLLIKE_RECEPTOR_SIGNALING_PATHWAY	-1.30315	0.0487078
KEGG_COMPLEMENT_AND_COAGULATION_CASCADES	-1.51364	0.0497916
REACTOME_FORMATION_OF_FIBRIN_CLOT_CLOTTING_CASCADE_	-1.51364	0.0497916
WP_BLOOD_CLOTTING_CASCADE	-1.51364	0.0497916
WP_COMPLEMENT_AND_COAGULATION_CASCADES	-1.51364	0.0497916

## Sheet: Suppl. Fig. S2A
Source data Supplementary Fig. S2A: Comparison of significant MutSig genes between cluster B1a and B2b and other tumors in TCGA-HNSC
Gene	p-value (Chi square test)		Gene	Samples altered (absolute)	Samples altered (percent)	Cluster
NOTCH1	0.0318368		TP53	256	0.78	Other
CASP8	0.0113232		CDKN2A	206	0.63	Other
TP53	0.323134		FAT1	109	0.33	Other
CDKN2A	0.138503		PIK3CA	91	0.28	Other
PIK3CA	5.73425e-06		NOTCH1	84	0.26	Other
NSD1	5.74935e-53		CASP8	58	0.18	Other
FBXW7	0.05462		NFE2L2	34	0.1	Other
HRAS	0.0119386		HRAS	29	0.09	Other
NFE2L2	0.00967512		EP300	29	0.09	Other
FAT1	0.638928		HLA-A	23	0.07	Other
HLA-A	0.330195		FBXW7	21	0.06	Other
EP300	0.0707654		NSD1	12	0.04	Other
			NSD1	43	0.8	B1a
			TP53	42	0.78	B1a
			CDKN2A	27	0.5	B1a
			PIK3CA	15	0.28	B1a
			FAT1	13	0.24	B1a
			NOTCH1	7	0.13	B1a
			FBXW7	5	0.09	B1a
			CASP8	3	0.06	B1a
			EP300	2	0.04	B1a
			HRAS	1	0.019	B1a
			NFE2L2	1	0.019	B1a
			HLA-A	1	0.019	B1a
			TP53	57	0.81	B2b
			PIK3CA	41	0.59	B2b
			CDKN2A	37	0.53	B2b
			FAT1	22	0.31	B2b
			NFE2L2	13	0.19	B2b
			FBXW7	10	0.14	B2b
			NOTCH1	9	0.13	B2b
			NSD1	7	0.1	B2b
			CASP8	4	0.06	B2b
			HLA-A	3	0.04	B2b
			EP300	1	0.014	B2b
			HRAS	0	0	B2b

## Sheet: Suppl. Fig. S2C
Source data Supplementary Fig. S2C: RQ-PCR analysis of UCHL1 expression in HNSCC cell lines with DAC treatment or DMSO as control
Experiment	Cell line	Treatment	CT Mean (UCHL1)	CT Mean (reference genes)1	ΔCTUCHL1	ΔCTreference genes	EUCHL1^(ΔCTUCHL1)2	Ereference genes^(ΔCTreference genes)3	Relative expression	Mean	SEM	SD
#1	Cal27	DMSO	29.1165	21.4375	-6.30088	-0.234919	0.0122177	0.854107	0.0143047	0.0132973	0.000333	0.000577
#2	Cal27	DMSO	29.5763	21.745	-6.76067	-0.542355	0.00885912	0.694837	0.0127499
#3	Cal27	DMSO	30.2174	22.4228	-7.4018	-1.22021	0.00565899	0.440819	0.0128374
#1	Cal27	0.5 µM DAC	26.6503	21.7661	-3.83465	-0.563458	0.068511	0.685063	0.100007	0.0914388	0.004485	0.007767
#2	Cal27	0.5 µM DAC	27.246	22.2206	-4.43034	-1.01803	0.0451755	0.5049	0.0894741
#3	Cal27	0.5 µM DAC	27.3185	22.2169	-4.50294	-1.01432	0.04294	0.506157	0.0848353
#1	Cal27	1 µM DAC	26.047	21.3414	-3.23142	-0.138843	0.10445	0.911008	0.114653	0.108139	0.006028	0.01044
#2	Cal27	1 µM DAC	26.9351	22.0074	-4.11954	-0.804795	0.0561392	0.582601	0.0963597
#3	Cal27	1 µM DAC	26.7989	22.1081	-3.98328	-0.905532	0.0617496	0.544506	0.113405
#1	FaDu	DMSO	29.9184	21.6453	-7.10279	-0.442728	0.00697462	0.742896	0.00938842	0.00971363	0.000333	0.000577
#2	FaDu	DMSO	29.7569	21.5809	-6.94131	-0.378274	0.00780814	0.775744	0.0100653
#3	FaDu	DMSO	29.5236	21.2808	-6.70798	-0.0782292	0.00919152	0.94884	0.00968711
#1	FaDu	0.5 µM DAC	28.045	21.9244	-5.22944	-0.721768	0.0258398	0.615995	0.0419481	0.0410734	0.000577	0.001
#2	FaDu	0.5 µM DAC	27.5614	21.3609	-4.74582	-0.158256	0.0362344	0.899212	0.0402957
#3	FaDu	0.5 µM DAC	27.8736	21.7109	-5.05798	-0.508304	0.0291303	0.710902	0.0409765
#1	FaDu	1 µM DAC	27.8166	21.8276	-5.00102	-0.625036	0.0303137	0.657322	0.046117	0.0539988	0.004359	0.00755
#2	FaDu	1 µM DAC	27.9139	22.3404	-5.09834	-1.13784	0.02832	0.465883	0.0607878
#3	FaDu	1 µM DAC	27.4902	21.7526	-4.67461	-0.54999	0.0380839	0.691285	0.0550916
#1	Detroit562	DMSO	22.8156	21.2026	0	0	1	1	1	1.0535	0.069211	0.119876
#2	Detroit562	DMSO	22.9925	21.4329	0.176918	0.230273	1.13166	1.16717	0.969573
#3	Detroit562	DMSO	23.7746	21.941	0.958965	0.738397	1.95502	1.64161	1.19091
#1	Detroit562	0.5 µM DAC	22.5214	21.2308	-0.294222	0.028151	0.814088	1.01908	0.798848	0.902878	0.088951	0.154068
#2	Detroit562	0.5 µM DAC	23.4924	22.1846	0.676804	0.98204	1.60503	1.93331	0.830199
#3	Detroit562	0.5 µM DAC	23.3421	21.6369	0.526537	0.434262	1.44498	1.33846	1.07959
#1	Detroit562	1 µM DAC	22.8336	21.3185	0.0180397	0.11592	1.01269	1.08092	0.936875	0.811485	0.076145	0.131888
#2	Detroit562	1 µM DAC	23.9482	22.9694	1.13257	1.76684	2.2073	3.27417	0.674154
#3	Detroit562	1 µM DAC	23.5273	22.2332	0.711712	1.0306	1.64469	1.99737	0.823425
#1	SCC25	DMSO	23.0056	21.9605	0.190033	0.757873	1.14208	1.66322	0.686668	0.892584	0.11081	0.191928
#2	SCC25	DMSO	23.2447	21.7671	0.42905	0.564449	1.34978	1.46069	0.924072
#3	SCC25	DMSO	28.0078	26.5131	5.19214	5.31051	37.704	35.336	1.06701
#1	SCC25	0.5 µM DAC	23.3109	22.3594	0.495247	1.15683	1.41372	2.17401	0.65028	0.758732	0.056369	0.097634
#2	SCC25	0.5 µM DAC	23.2953	22.0592	0.479706	0.856627	1.39844	1.77721	0.786872
#3	SCC25	0.5 µM DAC	28.1741	27.0444	5.3585	5.84181	42.3541	50.479	0.839044
#1	SCC25	1 µM DAC	23.2579	22.197	0.442287	0.994393	1.36233	1.94941	0.698842	0.895903	0.107025	0.185373
#2	SCC25	1 µM DAC	23.4992	22.0357	0.68359	0.833109	1.61267	1.74938	0.921853
#3	SCC25	1 µM DAC	28.0078	26.5131	5.19214	5.31051	37.704	35.336	1.06701
1 geometric mean of CT values for TBP, LMNB1 and ACTB
2 Primer efficiency (EUCHL1) = 2.01
3 Primer efficiency (Ereference genes) = 1.96

## Sheet: Suppl. Fig. S2D
Source data Supplementary Fig. S2D: Spearman correlation between CpG-probes and UCHL1 transcript levels in TCGA-HNSC
CpG-probe	Spearman's rho	p-value
cg18889780	-0.371418	6.14381e-16
cg15032098	-0.518394	1.1467e-35
cg04178266	-0.544373	7.6746e-40
cg24715245	-0.636576	4.72319e-58
cg07068756	-0.601884	1.68141e-50
cg16142306	-0.619872	2.68174e-54
cg16026922	-0.650781	1.97065e-61
cg08319991	-0.594725	5.83662e-49
cg09921610	-0.340499	5.19764e-15
cg16406708	-0.351775	5.55783e-16
cg09575242	-0.159932	0.000334819
cg08273672	0.475073	1.85628e-29
cg09270434	0.438018	8.29655e-25
cg02359506	0.130435	0.00351293

## Sheet: Suppl. Fig. S2E-F
Source data Supplementary Fig. S2E-F: Mean beta values for selected probes with significant correlation with UCHL1 expression values in TCGA-HNSC
Sample ID	Cluster	Mean beta value (selected probes; n=7)	UCHL1
TCGA-4P-AA8J-01	Other	0.375167	14.3143
TCGA-BA-4074-01	B1a	0.485177	9.9752
TCGA-BA-4076-01	Other	0.661026	2.86829
TCGA-BA-4078-01	B2b	0.636737	3.83736
TCGA-BA-5149-01	Other	0.479878
TCGA-BA-5151-01	Other	0.525342	0.237335
TCGA-BA-5152-01	Other	0.500094	16.7262
TCGA-BA-5555-01	B1a	0.362584	2.32544
TCGA-BA-5556-01	Other	0.458968	0.203068
TCGA-BA-5557-01	Other	0.434382	1.21001
TCGA-BA-5558-01	Other	0.517258	0.299229
TCGA-BA-6868-01	Other	0.695058	2.98856
TCGA-BA-6869-01	B1a	0.0953702	21.2984
TCGA-BA-6870-01	Other	0.459341	0.84177
TCGA-BA-6872-01	Other	0.32256	29.6605
TCGA-BA-6873-01	Other	0.492235	1.91338
TCGA-BA-7269-01	Other	0.65357	4.77114
TCGA-BA-A4IF-01	B1a	0.0962456	68.4469
TCGA-BA-A4IH-01	B2b	0.0790813	100.144
TCGA-BA-A4II-01	Other	0.287209	7.50702
TCGA-BA-A6D8-01	B2b	0.455225	14.5432
TCGA-BA-A6DA-01	Other	0.451081	1.77937
TCGA-BA-A6DB-01	Other	0.210215	5.28527
TCGA-BA-A6DD-01	Other	0.374754	3.03191
TCGA-BA-A6DE-01	B1a	0.496632	10.4708
TCGA-BA-A6DG-01	Other	0.393047	3.4602
TCGA-BA-A6DI-01	Other	0.426925	4.63845
TCGA-BA-A6DJ-01	Other	0.595609	0.257001
TCGA-BA-A6DL-01	B1a	0.116544	47.8452
TCGA-BA-A8YP-01	B2b	0.533829	7.01915
TCGA-BB-4217-01	Other	0.340253	1.59361
TCGA-BB-4224-01	Other	0.306406	0.820026
TCGA-BB-4227-01	Other	0.434933	2.10127
TCGA-BB-7862-01	B2b	0.0522561
TCGA-BB-7863-01	Other	0.460308
TCGA-BB-7864-01	B1a	0.0718879
TCGA-BB-7870-01	B1a	0.36971
TCGA-BB-7871-01	B2b	0.147746
TCGA-BB-7872-01	Other	0.546115
TCGA-BB-8596-01	Other	0.170504	69.377
TCGA-BB-8601-01	B2b	0.0835595	201.107
TCGA-BB-A5HU-01	Other	0.53608	2.96518
TCGA-BB-A5HY-01	Other	0.529601	1.53935
TCGA-BB-A5HZ-01	B1a	0.0952968	41.4991
TCGA-BB-A6UO-01	Other	0.546981	2.46793
TCGA-C9-A47Z-01	Other	0.659051	1.17006
TCGA-C9-A480-01	Other	0.338813	0.841326
TCGA-CN-4722-01	Other	0.484406	0.653876
TCGA-CN-4723-01	Other	0.452159	2.00745
TCGA-CN-4725-01	Other	0.504378	6.81993
TCGA-CN-4726-01	Other	0.437852	2.09925
TCGA-CN-4727-01	B1a	0.0696276	143.139
TCGA-CN-4728-01	Other	0.374379	4.91055
TCGA-CN-4729-01	Other	0.532754	0.899624
TCGA-CN-4730-01	B1a	0.0955516	63.2872
TCGA-CN-4731-01	B1a	0.461188	15.1019
TCGA-CN-4733-01	Other	0.286574	4.19223
TCGA-CN-4734-01	Other	0.560953	0.759505
TCGA-CN-4735-01	B2b	0.0879275	26.2828
TCGA-CN-4736-01	Other	0.514749	6.21336
TCGA-CN-4737-01	Other	0.523562	4.45946
TCGA-CN-4738-01	Other	0.34648	0.679648
TCGA-CN-4739-01	B1a	0.400159	0.672465
TCGA-CN-4740-01	Other	0.427763	8.85017
TCGA-CN-4742-01	Other	0.466221	2.12797
TCGA-CN-5355-01	Other	0.504252	2.97782
TCGA-CN-5356-01	B1a	0.144718	6.80622
TCGA-CN-5358-01	Other	0.171245	4.06844
TCGA-CN-5359-01	Other	0.131212	127.24
TCGA-CN-5360-01	B2b	0.135605	55.1091
TCGA-CN-5361-01	Other	0.441226	7.3911
TCGA-CN-5363-01	Other	0.439064	1.80494
TCGA-CN-5364-01	Other	0.482256	2.76502
TCGA-CN-5365-01	Other	0.48739	0.485089
TCGA-CN-5366-01	Other	0.488201	1.6643
TCGA-CN-5367-01	Other	0.379525	7.4133
TCGA-CN-5369-01	Other	0.403643	1.04059
TCGA-CN-5370-01	Other	0.455458	24.0304
TCGA-CN-5373-01	Other	0.548695	1.25711
TCGA-CN-6010-01	B2b	0.548162	6.03967
TCGA-CN-6011-01	Other	0.471257	4.46792
TCGA-CN-6012-01	B2b	0.516994	3.39252
TCGA-CN-6013-01	Other	0.570177	1.86377
TCGA-CN-6016-01	Other	0.396137	10.4683
TCGA-CN-6017-01	Other	0.309875	12.163
TCGA-CN-6018-01	Other	0.49094	3.43157
TCGA-CN-6019-01	B2b	0.138887	37.1048
TCGA-CN-6020-01	Other	0.559521	1.35908
TCGA-CN-6021-01	B2b	0.18315	18.899
TCGA-CN-6022-01	Other	0.109585	131.125
TCGA-CN-6023-01	B2b	0.126861	206.176
TCGA-CN-6024-01	B2b	0.461941	25.3478
TCGA-CN-6988-01	B1a	0.0597	15.1534
TCGA-CN-6989-01	B2b	0.425801	12.6243
TCGA-CN-6992-01	B2b	0.334953	41.2935
TCGA-CN-6994-01	Other	0.388587	23.6032
TCGA-CN-6995-01	Other	0.54281	0.841936
TCGA-CN-6996-01	Other	0.546493	3.73743
TCGA-CN-6997-01	B2b	0.0754608	149.318
TCGA-CN-6998-01	Other	0.422584	0.809502
TCGA-CN-A497-01	B1a	0.125968	32.1841
TCGA-CN-A498-01	Other	0.221783	10.1036
TCGA-CN-A499-01	Other	0.127384	55.0784
TCGA-CN-A49A-01	B2b	0.532577	1.20372
TCGA-CN-A49B-01	Other	0.579365	0.882186
TCGA-CN-A63T-01	B1a	0.0940869	58.2666
TCGA-CN-A63U-01	B1a	0.128118	12.0146
TCGA-CN-A63V-01	Other	0.448803	2.48527
TCGA-CN-A63W-01	B1a	0.0554604	77.3188
TCGA-CN-A641-01	B1a	0.0676438	27.9374
TCGA-CN-A642-01	Other	0.665601	1.93315
TCGA-CN-A6V3-01	B1a	0.213937	11.8143
TCGA-CQ-5324-01	Other	0.68329	1.00198
TCGA-CQ-5325-01	Other	0.438408	2.67813
TCGA-CQ-5326-01	Other	0.406185	1.59433
TCGA-CQ-5327-01	Other	0.542026	0.901159
TCGA-CQ-5329-01	Other	0.492347	3.04589
TCGA-CQ-5330-01	Other	0.557772	6.59851
TCGA-CQ-5331-01	Other	0.458192	0.225434
TCGA-CQ-5332-01	B2b	0.616999	3.04735
TCGA-CQ-5333-01	Other	0.467586	3.41112
TCGA-CQ-5334-01	Other	0.533926	2.41858
TCGA-CQ-6218-01	Other	0.472598	2.64965
TCGA-CQ-6219-01	Other	0.421647	3.53199
TCGA-CQ-6220-01	Other	0.515839	0.270116
TCGA-CQ-6222-01	Other	0.438853	3.03148
TCGA-CQ-6223-01	Other	0.423277	5.78523
TCGA-CQ-6224-01	Other	0.554622	8.12889
TCGA-CQ-6225-01	B1a	0.737387	0.393066
TCGA-CQ-6227-01	Other	0.383496	22.3798
TCGA-CQ-6228-01	B2b	0.065003	112.292
TCGA-CQ-6229-01	Other	0.442871	2.87425
TCGA-CQ-7063-01	Other	0.566636	0.102679
TCGA-CQ-7065-01	Other	0.560143	1.22977
TCGA-CQ-7067-01	Other	0.135041
TCGA-CQ-7068-01	Other	0.604205	0.107663
TCGA-CQ-7069-01	Other	0.562317	0.695168
TCGA-CQ-7071-01	Other	0.613746	0.677609
TCGA-CQ-7072-01	B2b	0.0851116	64.2537
TCGA-CQ-A4C6-01	Other	0.486842	1.4485
TCGA-CQ-A4C9-01	B1a	0.646652	0.922521
TCGA-CQ-A4CA-01	Other	0.241751	8.80735
TCGA-CQ-A4CB-01	Other	0.40874	3.00241
TCGA-CQ-A4CD-01	Other	0.453079	0.877046
TCGA-CQ-A4CE-01	Other	0.534524	0.378311
TCGA-CQ-A4CG-01	Other	0.604265	3.43231
TCGA-CQ-A4CH-01	Other	0.221428	1.42648
TCGA-CQ-A4CI-01	B2b	0.624559	0.692442
TCGA-CR-5247-01	B1a	0.611434	1.82507
TCGA-CR-6471-01	Other	0.326157	0.812257
TCGA-CR-6474-01	Other	0.40628	3.72243
TCGA-CR-6477-01	Other	0.427892	5.89283
TCGA-CR-6478-01	Other	0.476292	3.25882
TCGA-CR-6481-01	Other	0.202432	1.6164
TCGA-CR-6484-01	Other	0.501594	1.51509
TCGA-CR-6488-01	Other	0.367894	3.42871
TCGA-CR-6491-01	Other	0.68483	0.282383
TCGA-CR-6492-01	Other	0.351128	0.650792
TCGA-CR-6493-01	Other	0.63691	0.301741
TCGA-CR-7364-01	B1a	0.0810238	5.08299
TCGA-CR-7365-01	Other	0.564209	1.26871
TCGA-CR-7367-01	Other	0.364584	3.96774
TCGA-CR-7370-01	B2b	0.55768	1.44762
TCGA-CR-7371-01	B2b	0.304953	1.98955
TCGA-CR-7372-01	Other	0.478327	0.881086
TCGA-CR-7373-01	Other	0.586604	0.14887
TCGA-CR-7374-01	B2b	0.215078	6.2027
TCGA-CR-7376-01	Other	0.350528	2.29511
TCGA-CR-7377-01	Other	0.389711	4.98956
TCGA-CR-7379-01	Other	0.552874	1.75838
TCGA-CR-7380-01	Other	0.587172	1.3882
TCGA-CR-7382-01	Other	0.36828	2.13029
TCGA-CR-7383-01	Other	0.376149	5.33155
TCGA-CR-7386-01	Other	0.465781	3.92977
TCGA-CR-7388-01	B2b	0.177012	25.3408
TCGA-CR-7389-01	Other	0.382688	15.1144
TCGA-CR-7390-01	Other	0.487877	3.36902
TCGA-CR-7391-01	Other	0.267762	1.52403
TCGA-CR-7392-01	Other	0.233088	5.60544
TCGA-CR-7393-01	Other	0.2071	0.708564
TCGA-CR-7394-01	Other	0.451361	0.660121
TCGA-CR-7395-01	Other	0.392551	0.912371
TCGA-CR-7397-01	Other	0.399332	6.62194
TCGA-CR-7398-01	B2b	0.0763153	1.50668
TCGA-CR-7401-01	Other	0.228497	6.73451
TCGA-CR-7402-01	B1a	0.121391	6.67185
TCGA-CV-5430-01	Other	0.54903	4.52534
TCGA-CV-5432-01	Other	0.111569	83.2218
TCGA-CV-5434-01	B2b	0.535778	2.67138
TCGA-CV-5435-01	B2b	0.589376	5.10317
TCGA-CV-5436-01	Other	0.143138	56.671
TCGA-CV-5439-01	Other	0.455476	0.122819
TCGA-CV-5440-01	Other	0.262302	22.5913
TCGA-CV-5441-01	B1a	0.0966334	102.654
TCGA-CV-5442-01	Other	0.325243	0.161633
TCGA-CV-5444-01	Other	0.495501	3.67592
TCGA-CV-5966-01	Other	0.521622	2.30016
TCGA-CV-5970-01	Other	0.510704	1.87126
TCGA-CV-5971-01	Other	0.335323	16.2002
TCGA-CV-5973-01	Other	0.568713	0.280716
TCGA-CV-5976-01	Other	0.567389	2.47601
TCGA-CV-5977-01	Other	0.703905	0.692319
TCGA-CV-5978-01	B2b	0.107677	86.6992
TCGA-CV-5979-01	Other	0.663023	2.63218
TCGA-CV-6003-01	Other	0.659776	5.45303
TCGA-CV-6436-01	Other	0.554509	0.199347
TCGA-CV-6441-01	B1a	0.733601	2.06575
TCGA-CV-6933-01	Other	0.0908585	51.5049
TCGA-CV-6934-01	Other	0.400281	6.88141
TCGA-CV-6935-01	B2b	0.632245	6.37516
TCGA-CV-6936-01	Other	0.630416	0.614414
TCGA-CV-6937-01	B2b	0.160142	15.6256
TCGA-CV-6938-01	Other	0.415205	0.283971
TCGA-CV-6940-01	Other	0.652057	3.44331
TCGA-CV-6941-01	B1a	0.0765468	45.5363
TCGA-CV-6942-01	Other	0.544535	0.796609
TCGA-CV-6943-01	Other	0.413149	2.79538
TCGA-CV-6945-01	Other	0.366535	30.5921
TCGA-CV-6948-01	B2b	0.3321	13.7114
TCGA-CV-6950-01	Other	0.0896989	12.947
TCGA-CV-6951-01	Other	0.401486	47.0492
TCGA-CV-6952-01	Other	0.53172	0.880071
TCGA-CV-6953-01	Other	0.575999	0.0810227
TCGA-CV-6954-01	B1a	0.569737	8.92004
TCGA-CV-6955-01	Other	0.531016	0.987362
TCGA-CV-6956-01	Other	0.584848	0.655783
TCGA-CV-6959-01	Other	0.514311	0.938175
TCGA-CV-6960-01	B1a	0.0525125	176.046
TCGA-CV-6961-01	B2b	0.0902874	42.2294
TCGA-CV-6962-01	B2b	0.0659543	166.568
TCGA-CV-7089-01	Other	0.489119	0.728606
TCGA-CV-7090-01	Other	0.494559	3.86761
TCGA-CV-7091-01	B1a	0.119265	6.82775
TCGA-CV-7095-01	Other	0.574394	0.601356
TCGA-CV-7097-01	Other	0.509187	4.02086
TCGA-CV-7099-01	Other	0.620983	1.13897
TCGA-CV-7101-01	B2b	0.474873	3.82089
TCGA-CV-7102-01	Other	0.495687	7.10065
TCGA-CV-7103-01	B2b	0.0907348	19.5145
TCGA-CV-7104-01	Other	0.563093
TCGA-CV-7177-01	B2b	0.0726281	161.812
TCGA-CV-7178-01	Other	0.425194	3.14683
TCGA-CV-7180-01	Other	0.486287	0.21097
TCGA-CV-7183-01	Other	0.577605	0.371845
TCGA-CV-7235-01	Other	0.15772	8.59199
TCGA-CV-7236-01	Other	0.330389	3.75746
TCGA-CV-7238-01	Other	0.324886	8.39372
TCGA-CV-7242-01	B2b	0.159585	62.5199
TCGA-CV-7243-01	Other	0.545153
TCGA-CV-7245-01	B1a	0.0753723	48.1252
TCGA-CV-7247-01	Other	0.404244	5.98626
TCGA-CV-7248-01	B2b	0.175534	50.0617
TCGA-CV-7250-01	B1a	0.440587	2.49157
TCGA-CV-7252-01	Other	0.515959	0.868934
TCGA-CV-7253-01	B1a	0.0615577	10.9983
TCGA-CV-7254-01	B2b	0.194899	129.851
TCGA-CV-7255-01	Other	0.439709	3.20252
TCGA-CV-7261-01	B2b	0.442108	23.9302
TCGA-CV-7263-01	Other	0.627842	2.72501
TCGA-CV-7407-01	Other	0.512838	5.05749
TCGA-CV-7409-01	B1a	0.0816337
TCGA-CV-7410-01	Other	0.374402	1.71302
TCGA-CV-7411-01	Other	0.50961	0.366534
TCGA-CV-7413-01	Other	0.413904	1.51399
TCGA-CV-7414-01	Other	0.708529	2.52706
TCGA-CV-7415-01	Other	0.474577	3.36553
TCGA-CV-7416-01	Other	0.491581	26.0322
TCGA-CV-7418-01	B2b	0.068241	101.727
TCGA-CV-7421-01	Other	0.470889	6.43489
TCGA-CV-7422-01	Other	0.451289	1.29668
TCGA-CV-7423-01	Other	0.583741	1.24959
TCGA-CV-7424-01	B2b	0.46014	92.6925
TCGA-CV-7425-01	Other	0.571857	0.17312
TCGA-CV-7427-01	Other	0.558742	0.143788
TCGA-CV-7428-01	B1a	0.602939	0.833611
TCGA-CV-7429-01	Other	0.100722	339.661
TCGA-CV-7430-01	Other	0.152014	7.96209
TCGA-CV-7432-01	Other	0.186538	31.0235
TCGA-CV-7433-01	Other	0.276463	4.59679
TCGA-CV-7434-01	Other	0.680093	0.338669
TCGA-CV-7435-01	Other	0.102395	14.5152
TCGA-CV-7437-01	B2b	0.0743038	149.865
TCGA-CV-7438-01	Other	0.509775	2.7542
TCGA-CV-7440-01	B1a	0.0731174	83.5545
TCGA-CV-7446-01	B2b	0.0849468	28.2959
TCGA-CV-7568-01	Other	0.266065	3.13935
TCGA-CV-A45O-01	Other	0.503128	0.154789
TCGA-CV-A45P-01	Other	0.53227	0.479799
TCGA-CV-A45Q-01	Other	0.613401	0.610252
TCGA-CV-A45R-01	Other	0.583152	2.9686
TCGA-CV-A45T-01	Other	0.377306	1.47953
TCGA-CV-A45U-01	B2b	0.20228	20.072
TCGA-CV-A45V-01	Other	0.55731	0.78147
TCGA-CV-A45W-01	B2b	0.153561	84.0008
TCGA-CV-A45X-01	Other	0.427911	0.56744
TCGA-CV-A45Y-01	Other	0.337118	10.5107
TCGA-CV-A45Z-01	B2b	0.380386	2.70191
TCGA-CV-A461-01	B1a	0.176379	89.5824
TCGA-CV-A463-01	Other	0.592991	0.307524
TCGA-CV-A464-01	Other	0.398735	7.08961
TCGA-CV-A465-01	Other	0.221362	23.8486
TCGA-CV-A468-01	Other	0.309984	3.29521
TCGA-CV-A6JD-01	Other	0.575177	1.36505
TCGA-CV-A6JE-01	Other	0.563933	0.733542
TCGA-CV-A6JM-01	Other	0.0660033	128.128
TCGA-CV-A6JN-01	Other	0.53852	0.517731
TCGA-CV-A6JO-01	Other	0.416299	0.203743
TCGA-CV-A6JT-01	Other	0.531994	4.16591
TCGA-CV-A6JU-01	B1a	0.18765	36.8238
TCGA-CV-A6JY-01	Other	0.487601	1.11706
TCGA-CV-A6JZ-01	Other	0.472875	2.34789
TCGA-CV-A6K0-01	Other	0.291846	4.59689
TCGA-CV-A6K1-01	Other	0.586148	0.510677
TCGA-CV-A6K2-01	Other	0.483411	0.384598
TCGA-CX-7085-01	Other	0.435633	4.16342
TCGA-CX-7086-01	Other	0.0903285	26.4115
TCGA-CX-7219-01	Other	0.443876	1.26074
TCGA-CX-A4AQ-01	B2b	0.571396	6.66784
TCGA-D6-6515-01	Other	0.398859	1.18902
TCGA-D6-6516-01	Other	0.590001	0.278795
TCGA-D6-6517-01	Other	0.465591	0.654157
TCGA-D6-6823-01	B1a	0.127312	43.2004
TCGA-D6-6824-01	Other	0.269244	3.26222
TCGA-D6-6825-01	Other	0.461098	2.3405
TCGA-D6-6826-01	Other	0.483181	1.324
TCGA-D6-6827-01	B2b	0.119626	6.71811
TCGA-D6-8568-01	Other	0.521512	3.64875
TCGA-D6-8569-01	Other	0.576447	1.22198
TCGA-D6-A4Z9-01	Other	0.461759	1.36291
TCGA-D6-A4ZB-01	Other	0.377296	20.4903
TCGA-D6-A6EK-01	Other	0.513996	0.174515
TCGA-D6-A6EM-01	Other	0.462723	4.83945
TCGA-D6-A6EN-01	Other	0.522257	0.185114
TCGA-D6-A6EO-01	B1a	0.100116	136.466
TCGA-D6-A6EP-01	B2b	0.114062	38.8779
TCGA-D6-A6EQ-01	Other	0.434056	2.4756
TCGA-D6-A6ES-01	Other	0.568557	2.59417
TCGA-D6-A74Q-01	B1a	0.523286	0.442692
TCGA-DQ-5624-01	Other	0.394834	4.20969
TCGA-DQ-5625-01	Other	0.560355	2.80912
TCGA-DQ-5629-01	B2b	0.123175	92.5675
TCGA-DQ-5630-01	Other	0.505637	4.38618
TCGA-DQ-5631-01	Other	0.352499	116.381
TCGA-DQ-7588-01	Other	0.541994	1.81259
TCGA-DQ-7589-01	B2b	0.214428
TCGA-DQ-7592-01	Other	0.522854	2.49502
TCGA-DQ-7595-01	B1a	0.102798
TCGA-F7-7848-01	B1a	0.129603	17.4605
TCGA-F7-8298-01	Other	0.458561	1.24623
TCGA-F7-8489-01	Other	0.488962	0.678554
TCGA-F7-A50G-01	Other	0.470785	0.446412
TCGA-F7-A50I-01	Other	0.463048	2.18753
TCGA-F7-A50J-01	Other	0.437834	1.1208
TCGA-F7-A61S-01	Other	0.51414	0.365201
TCGA-F7-A61V-01	B1a	0.499987	2.66613
TCGA-F7-A61W-01	Other	0.140956	28.2227
TCGA-F7-A620-01	Other	0.488567	1.77041
TCGA-F7-A622-01	Other	0.632085	0.729662
TCGA-F7-A623-01	Other	0.111478	65.2894
TCGA-F7-A624-01	Other	0.552623	0.873237
TCGA-H7-7774-01	Other	0.559566	4.48219
TCGA-H7-8501-01	Other	0.578632	0.912828
TCGA-H7-8502-01	Other	0.631339	1.40497
TCGA-H7-A6C4-01	Other	0.489773	4.17878
TCGA-HD-7229-01	Other	0.606133	0.326731
TCGA-HD-7753-01	Other	0.515905	0.862343
TCGA-HD-7831-01	Other	0.433985	3.89602
TCGA-HD-7832-01	Other	0.602947	1.19944
TCGA-HD-7917-01	B1a	0.472268
TCGA-HD-8224-01	Other	0.1853	8.014
TCGA-HD-8634-01	Other	0.526381	0.547447
TCGA-HD-8635-01	Other	0.494494	3.61645
TCGA-HD-A4C1-01	Other	0.596314	0.666905
TCGA-HD-A633-01	Other	0.485486	1.20124
TCGA-HD-A634-01	B2b	0.208218	80.5178
TCGA-HD-A6HZ-01	Other	0.434803	2.87325
TCGA-HD-A6I0-01	Other	0.52825	0.599393
TCGA-IQ-7630-01	Other	0.521179	0.41289
TCGA-IQ-7631-01	Other	0.157421	2.35203
TCGA-IQ-7632-01	Other	0.124884	2.36158
TCGA-IQ-A61E-01	Other	0.515064	1.15466
TCGA-IQ-A61G-01	Other	0.625153	3.08056
TCGA-IQ-A61H-01	B2b	0.351317	26.61
TCGA-IQ-A61J-01	Other	0.283212	2.45719
TCGA-IQ-A61O-01	Other	0.487376	1.49308
TCGA-IQ-A6SG-01	Other	0.352918	50.4089
TCGA-IQ-A6SH-01	Other	0.551447	0.711067
TCGA-KU-A66S-01	B2b	0.0806632	218.968
TCGA-KU-A66T-01	Other	0.50385	8.1827
TCGA-KU-A6H8-01	Other	0.407342	2.4871
TCGA-MT-A51W-01	Other	0.336979	0.431409
TCGA-MT-A51X-01	Other	0.545743	1.64405
TCGA-MT-A67A-01	Other	0.469494	0.336269
TCGA-MT-A67D-01	Other	0.526743	1.56534
TCGA-MT-A67F-01	Other	0.484375	0.415897
TCGA-MT-A7BN-01	B2b	0.230127	7.67106
TCGA-MZ-A5BI-01	B2b	0.109558	88.5663
TCGA-MZ-A7D7-01	Other	0.306052	26.7577
TCGA-P3-A5Q6-01	Other	0.354044	48.5906
TCGA-P3-A5QA-01	Other	0.519254	2.35576
TCGA-P3-A6SX-01	Other	0.448035	1.22304
TCGA-P3-A6T0-01	Other	0.545767	3.7694
TCGA-P3-A6T2-01	Other	0.681843	0.856994
TCGA-P3-A6T3-01	Other	0.46917	1.82568
TCGA-P3-A6T4-01	Other	0.167289	13.7326
TCGA-P3-A6T5-01	Other	0.483084	10.4986
TCGA-P3-A6T7-01	Other	0.516093	0.59291
TCGA-P3-A6T8-01	Other	0.103767	45.1831
TCGA-QK-A64Z-01	Other	0.529803	1.03814
TCGA-QK-A652-01	Other	0.498127	2.61999
TCGA-QK-A6IF-01	B2b	0.148392	26.0183
TCGA-QK-A6IG-01	Other	0.430561	79.7413
TCGA-QK-A6IH-01	Other	0.562444	0.766191
TCGA-QK-A6II-01	Other	0.469976	0.570278
TCGA-QK-A6IJ-01	Other	0.484179	0.300842
TCGA-QK-A6VB-01	B1a	0.684605	0.622397
TCGA-QK-A6VC-01	Other	0.246023	1.1017
TCGA-QK-A8Z7-01	B2b	0.354445	66.1967
TCGA-QK-A8Z8-01	B1a	0.075624	184.355
TCGA-QK-A8Z9-01	Other	0.125568	28.7904
TCGA-QK-A8ZA-01	B2b	0.0768136	80.0418
TCGA-QK-A8ZB-01	Other	0.421407	3.34023
TCGA-QK-AA3J-01	B1a	0.26134	0.541348
TCGA-QK-AA3K-01	Other	0.145881	57.1777
TCGA-RS-A6TO-01	Other	0.536524	2.67512
TCGA-T2-A6WX-01	Other	0.54559	0.247265
TCGA-T2-A6WZ-01	Other	0.453252	3.3309
TCGA-T2-A6X2-01	Other	0.601849	0.581313
TCGA-T3-A92M-01	Other	0.384472	4.94684
TCGA-T3-A92N-01	Other	0.516123	2.84772
TCGA-TN-A7HI-01	B2b	0.441856	28.8067
TCGA-TN-A7HJ-01	Other	0.520526	0.743492
TCGA-UF-A718-01	Other	0.366138	51.308
TCGA-UF-A719-01	B1a	0.434551	7.51843
TCGA-UF-A71A-01	B2b	0.654632	4.77974
TCGA-UF-A71B-01	Other	0.598322	4.2688
TCGA-UF-A71D-01	B1a	0.216223	13.0876
TCGA-UF-A71E-01	B2b	0.602736	8.4684
TCGA-UF-A7J9-01	B2b	0.0847241	49.0921
TCGA-UF-A7JA-01	B2b	0.0670805	41.9224
TCGA-UF-A7JC-01	Other	0.651718	0.48026
TCGA-UF-A7JD-01	B2b	0.437394	7.10233
TCGA-UF-A7JF-01	B1a	0.109269	56.1765
TCGA-UF-A7JH-01	B1a	0.120519	7.08087
TCGA-UF-A7JJ-01	Other	0.24665	38.8574
TCGA-UF-A7JK-01	Other	0.639153	0.454534
TCGA-UF-A7JO-01	Other	0.500438	8.89351
TCGA-UF-A7JS-01	Other	0.428972	2.49644
TCGA-UF-A7JT-01	Other	0.507986	0.577937
TCGA-UF-A7JV-01	Other	0.46119	0.509254
TCGA-WA-A7GZ-01	Other	0.552343	1.86004
TCGA-WA-A7H4-01	Other	0.280209	7.30043

## Sheet: Suppl. Fig. S3A-C
Source data Supplementary Fig. S3A-C: Stratification of TCGA-HNSC based on ML model with enrichment for UCHL1-related gene set and HPV16 status.
Sample ID	Prediction	Cluster	HPV16-status	Positive gene set [GSVA]	Negative gene set [GSVA]
TCGA-4P-AA8J-01	Other	B1b		0.201366	-0.346997
TCGA-BA-4074-01	UCHL1-related	B1a	Negative	0.128455	-0.410262
TCGA-BA-4076-01	Other	A	Negative	-0.124387	0.407783
TCGA-BA-4078-01	UCHL1-related	B2b	Negative	0.470527	-0.702445
TCGA-BA-5149-01	Other	A	Negative	-0.432986	0.400866
TCGA-BA-5151-01	Other	A	Negative	-0.451323	0.715277
TCGA-BA-5152-01	Other	A	Negative	-0.217759	0.314031
TCGA-BA-5153-01	Other	B2a	Positive	0.333533	-0.586996
TCGA-BA-5555-01	UCHL1-related	B1a	Negative	0.387019	-0.422522
TCGA-BA-5556-01	Other	A	Negative	-0.490613	0.695931
TCGA-BA-5557-01	Other	A	Negative	-0.179587	0.678444
TCGA-BA-5558-01	Other	A	Negative	-0.466576	0.673733
TCGA-BA-5559-01	UCHL1-related	B2a	Positive	0.300911	-0.713217
TCGA-BA-6868-01	Other	B1b	Negative	0.267911	-0.0355404
TCGA-BA-6869-01	UCHL1-related	B1a	Negative	0.392199	-0.398631
TCGA-BA-6870-01	Other	A	Negative	-0.284105	0.49476
TCGA-BA-6871-01	UCHL1-related	B2a	Negative	0.397558	-0.71167
TCGA-BA-6872-01	Other	A	Negative	-0.101733	0.564032
TCGA-BA-6873-01	Other	A	Negative	-0.398558	0.157502
TCGA-BA-7269-01	Other	B1b	Negative	0.394637	0.00458692
TCGA-BA-A4IF-01	UCHL1-related	B1a	Negative	0.447997	-0.364709
TCGA-BA-A4IG-01	UCHL1-related	B2a	Positive	0.289937	-0.216353
TCGA-BA-A4IH-01	UCHL1-related	B2b	Positive	0.580389	-0.462079
TCGA-BA-A4II-01	Other	A	Negative	-0.141538	0.366944
TCGA-BA-A6D8-01	UCHL1-related	B2b	Negative	0.400248	-0.474824
TCGA-BA-A6DA-01	Other	A	Negative	0.0513547	0.636984
TCGA-BA-A6DB-01	Other	B1b	Negative	-0.10364	0.497273
TCGA-BA-A6DD-01	Other	A	Negative	-0.258628	0.529528
TCGA-BA-A6DE-01	UCHL1-related	B1a	Negative	0.078628	-0.0260072
TCGA-BA-A6DG-01	Other	B1b	Negative	-0.0466947	0.296458
TCGA-BA-A6DI-01	Other	B1b	Negative	0.0598808	0.508916
TCGA-BA-A6DJ-01	Other	A	Negative	-0.506265	0.687219
TCGA-BA-A6DL-01	UCHL1-related	B1a	Negative	0.241069	0.00435125
TCGA-BA-A8YP-01	UCHL1-related	B2b		0.429392	-0.703172
TCGA-BB-4217-01	Other	B1b	Negative	-0.209494	-0.479865
TCGA-BB-4223-01	UCHL1-related	B2a	Positive	0.25988	-0.703067
TCGA-BB-4224-01	Other	A	Negative	-0.307655	0.0112281
TCGA-BB-4225-01	UCHL1-related	B2a	Negative	0.431778	-0.616855
TCGA-BB-4227-01	Other	A		-0.124065	-0.0106755
TCGA-BB-4228-01	UCHL1-related	B2a	Positive	0.323989	-0.618804
TCGA-BB-7861-01	UCHL1-related	B2a	Positive	0.131997	-0.617317
TCGA-BB-7862-01	UCHL1-related	B2b	Negative	0.435825	-0.519226
TCGA-BB-7863-01	Other	A	Negative	-0.430473	0.730309
TCGA-BB-7864-01	UCHL1-related	B1a	Negative	0.343881	-0.34848
TCGA-BB-7866-01	UCHL1-related	B2a	Positive	0.0308603	-0.580928
TCGA-BB-7870-01	UCHL1-related	B1a	Negative	0.27193	-0.346691
TCGA-BB-7871-01	UCHL1-related	B2b	Negative	0.467147	-0.68558
TCGA-BB-7872-01	Other	A	Negative	-0.222608	0.352774
TCGA-BB-8596-01	Other	B1b	Negative	0.289431	-0.517839
TCGA-BB-8601-01	UCHL1-related	B2b	Negative	0.46196	-0.308045
TCGA-BB-A5HU-01	Other	A	Negative	-0.2865	0.247466
TCGA-BB-A5HY-01	Other	B1b	Negative	0.112507	-0.478872
TCGA-BB-A5HZ-01	UCHL1-related	B1a	Negative	-0.0958893	0.422639
TCGA-BB-A6UM-01	Other	B2a	Positive	-0.0577363	-0.317461
TCGA-BB-A6UO-01	Other	A	Negative	-0.418453	0.604737
TCGA-C9-A47Z-01	Other	A	Negative	-0.445144	0.730597
TCGA-C9-A480-01	Other	A	Negative	-0.461998	0.709084
TCGA-CN-4722-01	Other	A	Negative	-0.228399	0.633684
TCGA-CN-4723-01	Other	B1b	Negative	0.245527	-0.475264
TCGA-CN-4725-01	Other	B1b	Negative	-0.314095	0.517882
TCGA-CN-4726-01	Other	A	Negative	-0.206837	0.680071
TCGA-CN-4727-01	UCHL1-related	B1a	Negative	0.11021	-0.470104
TCGA-CN-4728-01	Other	B1b	Negative	0.401004	-0.592281
TCGA-CN-4729-01	Other	B1b	Negative	-0.0959045	0.442962
TCGA-CN-4730-01	UCHL1-related	B1a	Negative	0.178256	-0.100936
TCGA-CN-4731-01	UCHL1-related	B1a	Negative	0.266088	-0.222538
TCGA-CN-4733-01	Other	B1b	Negative	-0.0775385	-0.0938708
TCGA-CN-4734-01	Other	A	Negative	-0.484336	0.712086
TCGA-CN-4735-01	UCHL1-related	B2b	Negative	0.534896	-0.6837
TCGA-CN-4736-01	Other	B1b	Negative	-0.200265	0.221921
TCGA-CN-4737-01	Other	B1b	Negative	-0.119752	0.23967
TCGA-CN-4738-01	Other	B1b	Negative	-0.0936182	0.252109
TCGA-CN-4739-01	UCHL1-related	B1a	Negative	-0.0679826	-0.402783
TCGA-CN-4740-01	Other	B1b	Negative	0.156648	-0.0215898
TCGA-CN-4741-01	UCHL1-related	B2a	Positive	0.348374	-0.0474811
TCGA-CN-4742-01	Other	B1b	Negative	-0.164676	0.660705
TCGA-CN-5355-01	Other	B1b	Negative	-0.254067	0.27987
TCGA-CN-5356-01	UCHL1-related	B1a	Negative	0.0464378	-0.262251
TCGA-CN-5358-01	Other	B1b	Negative	-0.00221378	0.27667
TCGA-CN-5359-01	Other	B1b	Negative	0.159854	-0.1749
TCGA-CN-5360-01	UCHL1-related	B2b	Negative	0.500177	-0.499614
TCGA-CN-5361-01	Other	B1b	Negative	0.075289	-0.375543
TCGA-CN-5363-01	Other	A	Negative	-0.346655	-0.269775
TCGA-CN-5364-01	Other	A	Negative	-0.186331	-0.268185
TCGA-CN-5365-01	Other	A	Negative	-0.467873	0.601985
TCGA-CN-5366-01	Other	B1b	Negative	-0.45905	0.216814
TCGA-CN-5367-01	Other	B1b	Negative	-0.232211	-0.240755
TCGA-CN-5369-01	Other	B1b	Negative	-0.469795	0.597372
TCGA-CN-5370-01	Other	B1b	Negative	-0.146725	0.21656
TCGA-CN-5373-01	Other	B1b	Negative	-0.214847	0.710925
TCGA-CN-5374-01	UCHL1-related	B2a	Positive	0.127064	-0.46495
TCGA-CN-6010-01	UCHL1-related	B2b	Negative	0.516417	-0.730366
TCGA-CN-6011-01	Other	A	Negative	-0.236511	0.48706
TCGA-CN-6012-01	UCHL1-related	B2b	Negative	0.485446	-0.58391
TCGA-CN-6013-01	Other	A	Negative	-0.278713	0.225824
TCGA-CN-6016-01	Other	B1b	Negative	0.29698	-0.0465593
TCGA-CN-6017-01	Other	B1b	Negative	0.196377	-0.268186
TCGA-CN-6018-01	Other	B1b	Negative	-0.156815	-0.197057
TCGA-CN-6019-01	UCHL1-related	B2b	Negative	0.492308	-0.471366
TCGA-CN-6020-01	Other	A	Negative	-0.175637	0.518065
TCGA-CN-6021-01	UCHL1-related	B2b	Negative	0.415921	-0.283328
TCGA-CN-6022-01	Other	B1b	Negative	0.338989	-0.532714
TCGA-CN-6023-01	UCHL1-related	B2b	Negative	0.456457	-0.728381
TCGA-CN-6024-01	UCHL1-related	B2b	Negative	0.495509	-0.314617
TCGA-CN-6988-01	UCHL1-related	B1a	Negative	0.0681524	-0.290623
TCGA-CN-6989-01	UCHL1-related	B2b	Negative	0.439537	-0.670455
TCGA-CN-6992-01	UCHL1-related	B2b	Negative	0.52218	-0.67235
TCGA-CN-6994-01	Other	B1b	Negative	0.24728	0.0459149
TCGA-CN-6995-01	Other	A	Negative	-0.378836	0.242636
TCGA-CN-6996-01	Other	B1b	Negative	-0.360565	0.405198
TCGA-CN-6997-01	UCHL1-related	B2b	Negative	0.387899	-0.673437
TCGA-CN-6998-01	Other	A	Negative	-0.383993	0.765447
TCGA-CN-A497-01	UCHL1-related	B1a	Negative	0.396354	-0.666584
TCGA-CN-A498-01	Other	B1b	Negative	-0.0214658	0.436556
TCGA-CN-A499-01	Other	A	Positive	-0.107815	-0.0757119
TCGA-CN-A49A-01	UCHL1-related	B2b	Negative	0.408864	-0.456655
TCGA-CN-A49B-01	Other	A	Negative	-0.121744	-0.0889545
TCGA-CN-A49C-01	Other	B2a	Positive	0.220466	-0.238207
TCGA-CN-A63T-01	UCHL1-related	B1a	Negative	0.331454	-0.221993
TCGA-CN-A63U-01	UCHL1-related	B1a	Negative	0.346854	-0.578759
TCGA-CN-A63V-01	Other	B1b		-0.163816	0.0994685
TCGA-CN-A63W-01	UCHL1-related	B1a	Negative	0.302798	0.0720699
TCGA-CN-A641-01	UCHL1-related	B1a	Negative	0.202838	0.146718
TCGA-CN-A642-01	Other	A	Negative	-0.500637	-0.240591
TCGA-CN-A6UY-01	UCHL1-related	B2a	Positive	0.271537	-0.524049
TCGA-CN-A6V1-01	Other	B2a	Positive	0.0787203	-0.41518
TCGA-CN-A6V3-01	UCHL1-related	B1a	Negative	-0.154936	0.380104
TCGA-CN-A6V6-01	UCHL1-related	B2a	Positive	0.213516	-0.446896
TCGA-CN-A6V7-01	UCHL1-related	B2a	Positive	0.368618	-0.552553
TCGA-CQ-5323-01	UCHL1-related	B2a	Positive	0.347557	0.363409
TCGA-CQ-5324-01	Other	A	Negative	-0.00484746	0.278697
TCGA-CQ-5325-01	Other	B1b	Negative	-0.229002	0.610387
TCGA-CQ-5326-01	Other	A	Negative	-0.179287	0.533863
TCGA-CQ-5327-01	Other	A	Negative	-0.569208	0.645509
TCGA-CQ-5329-01	Other	B1b	Negative	-0.249434	0.124081
TCGA-CQ-5330-01	Other	B1b	Negative	-0.294596	-0.147925
TCGA-CQ-5331-01	Other	A	Negative	-0.5637	0.661489
TCGA-CQ-5332-01	UCHL1-related	B2b	Negative	0.496445	-0.390846
TCGA-CQ-5333-01	Other	A	Negative	-0.257327	-0.183672
TCGA-CQ-5334-01	Other	A	Negative	-0.424643	0.445284
TCGA-CQ-6218-01	Other	B1b	Negative	-0.248556	0.76169
TCGA-CQ-6219-01	Other	B1b	Negative	-0.320482	0.0510752
TCGA-CQ-6220-01	Other	A	Negative	-0.395252	0.723093
TCGA-CQ-6222-01	Other	B1b	Negative	-0.0130466	0.575002
TCGA-CQ-6223-01	Other	A	Negative	-0.304302	0.659496
TCGA-CQ-6224-01	Other	B1b	Negative	0.077183	-0.45107
TCGA-CQ-6225-01	UCHL1-related	B1a	Negative	0.353221	-0.341691
TCGA-CQ-6227-01	Other	B1b	Negative	-0.0383825	0.366009
TCGA-CQ-6228-01	UCHL1-related	B2b	Negative	0.44125	-0.553638
TCGA-CQ-6229-01	Other	B1b	Negative	-0.434738	0.73271
TCGA-CQ-7063-01	Other	A	Negative	-0.543129	0.772912
TCGA-CQ-7065-01	Other	A	Negative	-0.246915	0.525295
TCGA-CQ-7067-01	Other	B1b	Negative	-0.207663	0.131947
TCGA-CQ-7068-01	Other	A	Negative	-0.540646	0.320219
TCGA-CQ-7069-01	Other	A	Negative	-0.277542	0.573206
TCGA-CQ-7071-01	Other	A	Negative	-0.409141	0.765861
TCGA-CQ-7072-01	UCHL1-related	B2b	Negative	0.457887	-0.658098
TCGA-CQ-A4C6-01	Other	A	Negative	-0.481474	0.619301
TCGA-CQ-A4C9-01	UCHL1-related	B1a	Negative	0.282469	-0.354363
TCGA-CQ-A4CA-01	Other	B1b	Negative	-0.0286017	-0.0755819
TCGA-CQ-A4CB-01	Other	B1b	Negative	-0.322517	-0.259676
TCGA-CQ-A4CD-01	Other	A	Negative	-0.31415	0.259008
TCGA-CQ-A4CE-01	Other	A	Negative	-0.461992	0.689575
TCGA-CQ-A4CG-01	Other	A	Negative	0.00742319	-0.323917
TCGA-CQ-A4CH-01	Other	A	Negative	-0.377853	0.419278
TCGA-CQ-A4CI-01	UCHL1-related	B2b	Negative	0.434655	-0.620291
TCGA-CR-5243-01	Other	B2a	Positive	0.312315	-0.63421
TCGA-CR-5247-01	UCHL1-related	B1a	Negative	0.336829	-0.173006
TCGA-CR-5248-01	Other	B2a	Positive	-0.144229	-0.544915
TCGA-CR-5249-01	Other	B2a	Positive	0.35031	-0.453621
TCGA-CR-5250-01	UCHL1-related	B2a	Positive	0.374333	-0.601695
TCGA-CR-6467-01	UCHL1-related	B2a	Negative	0.285155	-0.680033
TCGA-CR-6470-01	Other	B2a	Positive	0.389619	-0.670324
TCGA-CR-6471-01	Other	A	Negative	-0.257917	0.549119
TCGA-CR-6472-01	UCHL1-related	B2a	Positive	0.309494	-0.565055
TCGA-CR-6473-01	UCHL1-related	B2a	Positive	0.256915	-0.520634
TCGA-CR-6474-01	Other	B1b	Negative	0.145386	-0.246179
TCGA-CR-6477-01	Other	B1b	Negative	-0.0812953	0.354357
TCGA-CR-6478-01	Other	B1b	Negative	0.0242951	-0.303062
TCGA-CR-6480-01	Other	B2a	Positive	0.249263	-0.368687
TCGA-CR-6481-01	Other	B1b	Positive	0.0741185	-0.494119
TCGA-CR-6482-01	UCHL1-related	B2a	Positive	0.416052	-0.658727
TCGA-CR-6484-01	Other	A	Negative	-0.331476	0.315885
TCGA-CR-6487-01	UCHL1-related	B2a	Positive	0.137907	-0.726464
TCGA-CR-6488-01	Other	B1b	Negative	-0.145307	0.377446
TCGA-CR-6491-01	Other	A	Negative	-0.345594	0.663242
TCGA-CR-6492-01	Other	B1b	Negative	-0.331723	0.638649
TCGA-CR-6493-01	Other	A	Negative	-0.404411	0.532261
TCGA-CR-7364-01	UCHL1-related	B1a	Negative	0.353002	-0.24908
TCGA-CR-7365-01	Other	B1b	Negative	-0.152569	0.646095
TCGA-CR-7367-01	Other	B1b	Negative	0.0659763	0.45908
TCGA-CR-7368-01	Other	B2a	Positive	0.0322682	-0.0420037
TCGA-CR-7369-01	Other	B2a	Positive	0.0379771	-0.0174291
TCGA-CR-7370-01	UCHL1-related	B2b	Negative	0.534421	-0.665468
TCGA-CR-7371-01	UCHL1-related	B2b	Negative	0.550993	-0.480866
TCGA-CR-7372-01	Other	B1b	Negative	-0.0325948	0.536189
TCGA-CR-7373-01	Other	A	Negative	-0.466757	0.378299
TCGA-CR-7374-01	UCHL1-related	B2b	Negative	0.519528	-0.702864
TCGA-CR-7376-01	Other	B1b	Negative	0.0822996	-0.151099
TCGA-CR-7377-01	Other	B1b	Negative	-0.0192522	-0.000262803
TCGA-CR-7379-01	Other	B1b	Negative	-0.0282177	0.310385
TCGA-CR-7380-01	Other	A	Negative	-0.29195	0.517977
TCGA-CR-7382-01	Other	A	Negative	-0.143463	-0.430452
TCGA-CR-7383-01	Other	B1b	Negative	0.00615278	-0.428637
TCGA-CR-7385-01	UCHL1-related	B2a	Positive	0.154467	-0.390298
TCGA-CR-7386-01	Other	B1b	Negative	-0.0288307	0.400237
TCGA-CR-7388-01	UCHL1-related	B2b	Negative	0.440804	-0.518143
TCGA-CR-7389-01	Other	B1b	Negative	0.264424	0.1212
TCGA-CR-7390-01	Other	B1b	Negative	0.250879	0.171011
TCGA-CR-7391-01	Other	B1b	Negative	-0.0227713	0.497345
TCGA-CR-7392-01	Other	B1b	Negative	-0.153048	0.335853
TCGA-CR-7393-01	Other	B1b	Negative	0.23611	0.349885
TCGA-CR-7394-01	Other	A	Negative	-0.267885	0.607446
TCGA-CR-7395-01	Other	A	Negative	-0.473317	0.663189
TCGA-CR-7397-01	Other	B1b	Negative	0.309571	0.264764
TCGA-CR-7398-01	UCHL1-related	B2b	Negative	0.447832	-0.618076
TCGA-CR-7399-01	UCHL1-related	B2a	Negative	0.461704	-0.678161
TCGA-CR-7401-01	Other	B1b	Negative	-0.134914	0.56533
TCGA-CR-7402-01	UCHL1-related	B1a	Negative	0.426434	-0.542649
TCGA-CR-7404-01	UCHL1-related	B2a	Positive	0.0880994	-0.548593
TCGA-CV-5430-01	Other	B1b	Negative	0.417209	-0.578821
TCGA-CV-5431-01	Other	B2a	Negative	0.193804	-0.630957
TCGA-CV-5432-01	Other	B1b	Negative	0.400823	-0.116406
TCGA-CV-5434-01	UCHL1-related	B2b	Negative	0.460988	-0.666025
TCGA-CV-5435-01	UCHL1-related	B2b	Negative	0.501114	-0.566256
TCGA-CV-5436-01	Other	B1b	Negative	-0.0574764	-0.099525
TCGA-CV-5439-01	Other	A	Negative	-0.343397	0.665339
TCGA-CV-5440-01	Other	B1b	Negative	0.397522	-0.344545
TCGA-CV-5441-01	UCHL1-related	B1a	Negative	0.06029	-0.0470739
TCGA-CV-5442-01	Other	A	Positive	-0.26208	0.514695
TCGA-CV-5443-01	UCHL1-related	B2a	Positive	0.205082	-0.685969
TCGA-CV-5444-01	Other	B1b	Negative	0.0353856	-0.254356
TCGA-CV-5966-01	Other	A	Negative	-0.3423	-0.142511
TCGA-CV-5970-01	Other	B1b	Negative	-0.177171	0.686701
TCGA-CV-5971-01	Other	B1b	Positive	0.252204	-0.577864
TCGA-CV-5973-01	Other	A	Negative	-0.220813	0.621192
TCGA-CV-5976-01	Other	A	Negative	-0.440222	0.25512
TCGA-CV-5977-01	Other	A	Negative	-0.445564	0.529326
TCGA-CV-5978-01	UCHL1-related	B2b	Negative	0.502601	-0.663074
TCGA-CV-5979-01	Other	A	Negative	-0.326142	0.411887
TCGA-CV-6003-01	Other	A	Negative	-0.205088	0.246846
TCGA-CV-6433-01	UCHL1-related	B2a	Positive	0.316389	-0.625487
TCGA-CV-6436-01	Other	A	Negative	-0.329152	0.660336
TCGA-CV-6441-01	UCHL1-related	B1a	Negative	0.213671	-0.53062
TCGA-CV-6933-01	Other	B1b	Negative	0.321178	-0.261498
TCGA-CV-6934-01	Other	B1b	Negative	0.288369	-0.451083
TCGA-CV-6935-01	UCHL1-related	B2b	Negative	0.416823	-0.465704
TCGA-CV-6936-01	Other	A	Negative	-0.23681	-0.136445
TCGA-CV-6937-01	UCHL1-related	B2b	Negative	0.414173	-0.379892
TCGA-CV-6938-01	Other	A	Negative	-0.50247	0.597227
TCGA-CV-6939-01	UCHL1-related	B2a	Negative	0.34393	-0.670121
TCGA-CV-6940-01	Other	B1b	Negative	0.304963	-0.212625
TCGA-CV-6941-01	UCHL1-related	B1a	Negative	0.423108	-0.500592
TCGA-CV-6942-01	Other	B1b	Negative	-0.434747	-0.349455
TCGA-CV-6943-01	Other	B1b	Negative	-0.143694	0.459449
TCGA-CV-6945-01	Other	B1b	Negative	0.178438	0.399475
TCGA-CV-6948-01	UCHL1-related	B2b	Negative	0.433464	-0.684096
TCGA-CV-6950-01	Other	B1b	Negative	-0.020294	-0.247916
TCGA-CV-6951-01	Other	B1b	Negative	0.361335	-0.307111
TCGA-CV-6952-01	Other	A	Negative	-0.51674	0.768245
TCGA-CV-6953-01	Other	A	Negative	-0.426742	0.716245
TCGA-CV-6954-01	UCHL1-related	B1a	Negative	0.0125449	0.364289
TCGA-CV-6955-01	Other	A	Negative	-0.191015	0.670486
TCGA-CV-6956-01	Other	A	Negative	-0.135383	0.319795
TCGA-CV-6959-01	Other	B1b	Negative	-0.369687	0.427599
TCGA-CV-6960-01	UCHL1-related	B1a	Negative	0.382492	-0.271491
TCGA-CV-6961-01	UCHL1-related	B2b	Positive	0.473481	-0.216092
TCGA-CV-6962-01	UCHL1-related	B2b	Negative	0.554987	-0.560595
TCGA-CV-7089-01	Other	A	Negative	-0.480407	0.633853
TCGA-CV-7090-01	Other	A	Negative	-0.329961	0.38702
TCGA-CV-7091-01	UCHL1-related	B1a	Negative	-0.0733815	0.31149
TCGA-CV-7095-01	Other	A	Negative	-0.285491	0.463817
TCGA-CV-7097-01	Other	B1b	Negative	-0.231842	0.216964
TCGA-CV-7099-01	Other	A	Negative	-0.452356	0.595365
TCGA-CV-7100-01	UCHL1-related	B2a	Negative	0.0329289	-0.559002
TCGA-CV-7101-01	UCHL1-related	B2b	Negative	0.437976	-0.39651
TCGA-CV-7102-01	Other	B1b	Negative	-0.189189	-0.240833
TCGA-CV-7103-01	UCHL1-related	B2b	Negative	0.556007	-0.687288
TCGA-CV-7104-01	Other	B1b	Negative	-0.13014	0.440422
TCGA-CV-7177-01	UCHL1-related	B2b	Negative	0.489237	-0.291372
TCGA-CV-7178-01	Other	B1b	Negative	-0.122843	-0.288163
TCGA-CV-7180-01	Other	A	Negative	-0.423579	0.629651
TCGA-CV-7183-01	Other	A	Negative	-0.264598	0.766551
TCGA-CV-7235-01	Other	B1b	Negative	0.160002	-0.36341
TCGA-CV-7236-01	Other	B1b	Negative	-0.105709	-0.132681
TCGA-CV-7238-01	Other	B1b	Negative	-0.224962	0.317767
TCGA-CV-7242-01	UCHL1-related	B2b	Negative	0.478002	-0.609707
TCGA-CV-7243-01	Other	B1b	Negative	-0.11592	0.363795
TCGA-CV-7245-01	UCHL1-related	B1a	Negative	0.340782	0.0101444
TCGA-CV-7247-01	Other	B1b	Negative	-0.0577661	-0.33063
TCGA-CV-7248-01	UCHL1-related	B2b	Negative	0.483378	-0.637801
TCGA-CV-7250-01	UCHL1-related	B1a	Negative	0.342091	-0.225423
TCGA-CV-7252-01	Other	A	Negative	-0.469624	0.528287
TCGA-CV-7253-01	UCHL1-related	B1a	Negative	0.193063	-0.279728
TCGA-CV-7254-01	UCHL1-related	B2b	Negative	0.512269	-0.683914
TCGA-CV-7255-01	Other	A	Negative	-0.334328	0.444985
TCGA-CV-7261-01	UCHL1-related	B2b	Negative	0.487701	-0.590718
TCGA-CV-7263-01	Other	B1b	Negative	0.189855	-0.518303
TCGA-CV-7406-01	UCHL1-related	B2a	Positive	0.513946	-0.603694
TCGA-CV-7407-01	Other	B1b	Negative	0.33759	-0.376712
TCGA-CV-7409-01	UCHL1-related	B1a	Negative	0.325904	-0.377624
TCGA-CV-7410-01	Other	B1b	Negative	-0.391564	0.128859
TCGA-CV-7411-01	Other	A	Negative	-0.173057	0.737639
TCGA-CV-7413-01	Other	B1b	Negative	-0.314842	0.424565
TCGA-CV-7414-01	Other	B1b	Negative	0.376478	-0.473214
TCGA-CV-7415-01	Other	B1b	Negative	0.0191837	0.0759403
TCGA-CV-7416-01	Other	B1b	Negative	-0.168843	0.0169173
TCGA-CV-7418-01	UCHL1-related	B2b	Negative	0.566596	-0.716007
TCGA-CV-7421-01	Other	B1b	Negative	0.428795	-0.550647
TCGA-CV-7422-01	Other	B1b	Negative	0.275149	-0.537483
TCGA-CV-7423-01	Other	A	Negative	-0.361797	0.658935
TCGA-CV-7424-01	UCHL1-related	B2b	Negative	0.565762	-0.735531
TCGA-CV-7425-01	Other	A	Negative	-0.472669	0.70005
TCGA-CV-7427-01	Other	A	Negative	-0.480798	0.725988
TCGA-CV-7428-01	UCHL1-related	B1a	Negative	-0.259893	0.416812
TCGA-CV-7429-01	Other	B1b	Negative	0.119529	-0.553368
TCGA-CV-7430-01	Other	B1b	Negative	0.436564	0.312175
TCGA-CV-7432-01	Other	A	Negative	-0.171545	0.57158
TCGA-CV-7433-01	Other	B1b	Negative	-0.0381296	0.361504
TCGA-CV-7434-01	Other	A	Negative	-0.381602	0.52714
TCGA-CV-7435-01	Other	B1b	Negative	0.40095	-0.475904
TCGA-CV-7437-01	UCHL1-related	B2b	Negative	0.40868	-0.55764
TCGA-CV-7438-01	Other	B1b	Negative	-0.275019	-0.0804811
TCGA-CV-7440-01	UCHL1-related	B1a	Negative	0.13211	-0.357574
TCGA-CV-7446-01	UCHL1-related	B2b		0.522522	-0.430364
TCGA-CV-7568-01	Other	B1b		-0.0592208	-0.210517
TCGA-CV-A45O-01	Other	A	Negative	-0.310661	0.779792
TCGA-CV-A45P-01	Other	A	Negative	-0.474124	0.741195
TCGA-CV-A45Q-01	Other	A	Negative	-0.031435	0.647206
TCGA-CV-A45R-01	Other	B1b	Negative	-0.240938	0.505603
TCGA-CV-A45T-01	Other	A	Negative	-0.43437	0.57804
TCGA-CV-A45U-01	UCHL1-related	B2b	Negative	0.577995	-0.550159
TCGA-CV-A45V-01	Other	A	Negative	-0.339697	0.585749
TCGA-CV-A45W-01	UCHL1-related	B2b	Negative	0.551023	-0.703053
TCGA-CV-A45X-01	Other	A	Negative	-0.17311	0.607471
TCGA-CV-A45Y-01	Other	B1b	Negative	0.186169	-0.165808
TCGA-CV-A45Z-01	UCHL1-related	B2b	Negative	0.524247	-0.571247
TCGA-CV-A460-01	Other	B2a	Negative	0.170249	-0.612948
TCGA-CV-A461-01	UCHL1-related	B1a	Negative	0.407177	-0.564094
TCGA-CV-A463-01	Other	A	Negative	-0.415563	0.714024
TCGA-CV-A464-01	Other	B1b	Negative	-0.141519	-0.208173
TCGA-CV-A465-01	Other	B1b	Negative	-0.0587717	0.640151
TCGA-CV-A468-01	Other	B1b	Negative	-0.207484	0.328339
TCGA-CV-A6JD-01	Other	A	Negative	-0.314907	-0.308696
TCGA-CV-A6JE-01	Other	A	Negative	-0.115086	0.157904
TCGA-CV-A6JM-01	Other	A	Negative	0.229027	0.282886
TCGA-CV-A6JN-01	Other	A	Negative	-0.337891	0.63717
TCGA-CV-A6JO-01	Other	A	Negative	-0.528739	0.675955
TCGA-CV-A6JT-01	Other	A		-0.217558	0.565797
TCGA-CV-A6JU-01	UCHL1-related	B1a	Negative	0.273779	-0.408886
TCGA-CV-A6JY-01	Other	A	Negative	-0.101235	0.661937
TCGA-CV-A6JZ-01	Other	A	Negative	-0.418286	-0.122935
TCGA-CV-A6K0-01	Other	B1b		-0.215129	-0.288515
TCGA-CV-A6K1-01	Other	A	Negative	-0.073005	0.445137
TCGA-CV-A6K2-01	Other	A		-0.333947	0.446918
TCGA-CX-7085-01	Other	B1b	Negative	0.00181056	0.584574
TCGA-CX-7086-01	Other	A	Negative	-0.0365237	0.435021
TCGA-CX-7219-01	Other	B1b	Negative	-0.18854	0.293157
TCGA-CX-A4AQ-01	UCHL1-related	B2b	Negative	0.442064	-0.651481
TCGA-D6-6515-01	Other	B1b	Negative	-0.145296	-0.0414804
TCGA-D6-6516-01	Other	A	Negative	-0.424635	0.653219
TCGA-D6-6517-01	Other	A	Negative	-0.426351	0.298839
TCGA-D6-6823-01	UCHL1-related	B1a	Negative	0.0746927	-0.355534
TCGA-D6-6824-01	Other	B1b	Negative	0.302463	-0.472469
TCGA-D6-6825-01	Other	B1b	Negative	-0.330066	0.511151
TCGA-D6-6826-01	Other	B1b	Negative	-0.203786	0.13588
TCGA-D6-6827-01	UCHL1-related	B2b	Negative	0.427971	-0.633593
TCGA-D6-8568-01	Other	B1b	Negative	-0.0820018	-0.0961421
TCGA-D6-8569-01	Other	A	Negative	-0.427444	0.39831
TCGA-D6-A4Z9-01	Other	A	Negative	-0.442568	0.45122
TCGA-D6-A4ZB-01	Other	B1b	Negative	0.320595	0.256791
TCGA-D6-A6EK-01	Other	A	Negative	-0.289812	0.669619
TCGA-D6-A6EM-01	Other	A	Negative	-0.130593	-0.0432924
TCGA-D6-A6EN-01	Other	A	Negative	-0.326015	0.255076
TCGA-D6-A6EO-01	UCHL1-related	B1a	Negative	0.405818	-0.482087
TCGA-D6-A6EP-01	UCHL1-related	B2b	Negative	0.489907	-0.501084
TCGA-D6-A6EQ-01	Other	A		-0.127737	0.378413
TCGA-D6-A6ES-01	Other	A	Negative	0.152532	0.514821
TCGA-D6-A74Q-01	UCHL1-related	B1a	Negative	0.189785	-0.393541
TCGA-DQ-5624-01	Other	B1b	Negative	-0.0640439	0.476637
TCGA-DQ-5625-01	Other	B1b	Negative	-0.267093	0.59532
TCGA-DQ-5629-01	UCHL1-related	B2b	Negative	0.50041	-0.540169
TCGA-DQ-5630-01	Other	B1b	Negative	-0.329916	0.494061
TCGA-DQ-5631-01	Other	B1b	Negative	-0.058931	-0.330993
TCGA-DQ-7588-01	Other	A	Negative	-0.154442	0.317889
TCGA-DQ-7589-01	UCHL1-related	B2b	Negative	0.547743	-0.549407
TCGA-DQ-7590-01	UCHL1-related	B2a	Positive	0.274483	-0.599349
TCGA-DQ-7591-01	UCHL1-related	B2a	Negative	0.244195	-0.702293
TCGA-DQ-7592-01	Other	B1b	Negative	-0.0750438	0.350681
TCGA-DQ-7593-01	Other	B2a	Positive	0.0350987	-0.490598
TCGA-DQ-7594-01	Other	B2a	Positive	0.304297	-0.493949
TCGA-DQ-7595-01	UCHL1-related	B1a	Negative	0.444737	-0.556517
TCGA-DQ-7596-01	Other	B2a	Positive	0.281017	-0.279936
TCGA-F7-7848-01	UCHL1-related	B1a	Negative	0.208126	-0.475186
TCGA-F7-8298-01	Other	B1b	Negative	-0.0811347	-0.296092
TCGA-F7-8489-01	Other	A	Negative	-0.259746	0.36528
TCGA-F7-A50G-01	Other	A	Negative	-0.420304	0.7187
TCGA-F7-A50I-01	Other	B1b	Negative	0.0559849	0.248188
TCGA-F7-A50J-01	Other	A	Negative	-0.3726	0.709704
TCGA-F7-A61S-01	Other	A	Negative	-0.453315	0.629396
TCGA-F7-A61V-01	UCHL1-related	B1a	Negative	0.0585433	0.115429
TCGA-F7-A61W-01	Other	A	Negative	-0.278061	0.0343202
TCGA-F7-A620-01	Other	A	Negative	-0.483299	0.568839
TCGA-F7-A622-01	Other	A	Negative	-0.254326	0.613122
TCGA-F7-A623-01	Other	B1b	Negative	0.17406	0.176906
TCGA-F7-A624-01	Other	A	Negative	-0.185644	-0.550112
TCGA-H7-7774-01	Other	A	Negative	-0.0565193	0.626302
TCGA-H7-8501-01	Other	A	Negative	-0.454483	0.0685375
TCGA-H7-8502-01	Other	A	Negative	-0.373197	0.141565
TCGA-H7-A6C4-01	Other	B1b	Negative	-0.286803	0.758805
TCGA-H7-A76A-01	Other	B2a	Positive	0.138582	-0.404233
TCGA-HD-7229-01	Other	A	Negative	-0.442218	0.489913
TCGA-HD-7753-01	Other	B1b	Negative	-0.0696399	0.26636
TCGA-HD-7754-01	UCHL1-related	B2a	Positive	0.353768	-0.465742
TCGA-HD-7831-01	Other	B1b	Negative	0.224724	-0.375221
TCGA-HD-7832-01	Other	A	Negative	-0.328782	0.450698
TCGA-HD-7917-01	UCHL1-related	B1a	Negative	-0.146709	0.371669
TCGA-HD-8224-01	Other	B1b	Negative	0.258757	-0.52176
TCGA-HD-8314-01	UCHL1-related	B2a	Negative	0.43118	-0.536932
TCGA-HD-8634-01	Other	A	Negative	-0.453282	0.814802
TCGA-HD-8635-01	Other	B1b	Negative	-0.094685	0.230945
TCGA-HD-A4C1-01	Other	A	Negative	-0.476465	0.678933
TCGA-HD-A633-01	Other	A	Negative	-0.404604	0.41924
TCGA-HD-A634-01	UCHL1-related	B2b	Positive	0.451451	-0.577013
TCGA-HD-A6HZ-01	Other	B1b		0.136878	-0.188437
TCGA-HD-A6I0-01	Other	A	Negative	-0.299337	0.605956
TCGA-HL-7533-01	Other	B2a	Positive	-0.167156	-0.162692
TCGA-IQ-7630-01	Other	A	Negative	-0.546418	0.401463
TCGA-IQ-7631-01	Other	B1b	Negative	0.227865	-0.45833
TCGA-IQ-7632-01	Other	A	Negative	-0.116228	0.597211
TCGA-IQ-A61E-01	Other	A	Negative	-0.448502	0.513878
TCGA-IQ-A61G-01	Other	A	Negative	0.0876211	0.0220125
TCGA-IQ-A61H-01	UCHL1-related	B2b	Negative	0.446798	-0.570841
TCGA-IQ-A61I-01	UCHL1-related	B2a	Negative	0.354608	-0.41955
TCGA-IQ-A61J-01	Other	B1b	Negative	-0.300935	0.556155
TCGA-IQ-A61O-01	Other	B1b	Negative	0.192989	-0.576465
TCGA-IQ-A6SG-01	Other	B1b	Negative	0.295151	-0.0635534
TCGA-IQ-A6SH-01	Other	A	Negative	-0.249	0.523857
TCGA-KU-A66S-01	UCHL1-related	B2b	Negative	0.48844	-0.652242
TCGA-KU-A66T-01	Other	A	Negative	-0.0797805	0.277392
TCGA-KU-A6H7-01	Other	B2a	Positive	0.0822258	-0.412091
TCGA-KU-A6H8-01	Other	B1b	Negative	0.219874	-0.272548
TCGA-MT-A51W-01	Other	A	Negative	-0.398852	0.772638
TCGA-MT-A51X-01	Other	A	Negative	-0.423728	0.728019
TCGA-MT-A67A-01	Other	A	Negative	-0.328187	0.619995
TCGA-MT-A67D-01	Other	B1b	Negative	-0.151781	0.45273
TCGA-MT-A67F-01	Other	A	Negative	-0.482885	0.721176
TCGA-MT-A7BN-01	UCHL1-related	B2b	Negative	0.16867	-0.486502
TCGA-MZ-A5BI-01	UCHL1-related	B2b	Negative	0.431034	-0.306791
TCGA-MZ-A6I9-01	UCHL1-related	B2a	Positive	0.303817	-0.358907
TCGA-MZ-A7D7-01	Other	B1b	Negative	0.155749	0.352863
TCGA-P3-A5Q5-01	Other	B2a	Positive	-0.182246	-0.45172
TCGA-P3-A5Q6-01	Other	B1b	Negative	0.196243	-0.295496
TCGA-P3-A5QA-01	Other	B1b	Negative	-0.0247021	-0.432586
TCGA-P3-A5QE-01	UCHL1-related	B2a	Positive	0.338951	-0.537976
TCGA-P3-A5QF-01	UCHL1-related	B2a	Positive	0.140292	-0.0738606
TCGA-P3-A6SW-01	UCHL1-related	B2a	Positive	0.176701	-0.570196
TCGA-P3-A6SX-01	Other	A	Negative	-0.274282	0.160065
TCGA-P3-A6T0-01	Other	A	Negative	-0.175611	0.0274766
TCGA-P3-A6T2-01	Other	A	Negative	-0.525839	0.341661
TCGA-P3-A6T3-01	Other	A	Negative	-0.363898	0.639068
TCGA-P3-A6T4-01	Other	B1b	Negative	0.125084	0.47513
TCGA-P3-A6T5-01	Other	A	Negative	-0.271215	0.494146
TCGA-P3-A6T6-01	UCHL1-related	B2a	Positive	0.153987	-0.345525
TCGA-P3-A6T7-01	Other	A	Negative	-0.413998	0.644521
TCGA-P3-A6T8-01	Other	B1b	Negative	0.278393	-0.518303
TCGA-QK-A64Z-01	Other	A	Negative	-0.436168	0.0677638
TCGA-QK-A652-01	Other	B1b	Negative	-0.379181	0.621276
TCGA-QK-A6IF-01	UCHL1-related	B2b		0.415194	-0.65101
TCGA-QK-A6IG-01	Other	A		-0.286347	-0.368874
TCGA-QK-A6IH-01	Other	A	Negative	-0.186839	0.504515
TCGA-QK-A6II-01	Other	A	Negative	-0.2399	0.715333
TCGA-QK-A6IJ-01	Other	A	Negative	-0.0201682	0.504962
TCGA-QK-A6V9-01	UCHL1-related	B2a	Positive	0.351525	-0.560354
TCGA-QK-A6VB-01	UCHL1-related	B1a	Negative	0.231196	-0.536282
TCGA-QK-A6VC-01	Other	A	Negative	-0.282915	-0.152031
TCGA-QK-A8Z7-01	UCHL1-related	B2b		0.489924	-0.623862
TCGA-QK-A8Z8-01	UCHL1-related	B1a		0.417474	-0.461521
TCGA-QK-A8Z9-01	Other	B1b		0.0439104	-0.458205
TCGA-QK-A8ZA-01	UCHL1-related	B2b		0.433071	-0.474961
TCGA-QK-A8ZB-01	Other	B1b		0.0633353	0.442735
TCGA-QK-AA3J-01	UCHL1-related	B1a		0.155247	-0.521544
TCGA-QK-AA3K-01	Other	B1b		0.237017	-0.704761
TCGA-RS-A6TO-01	Other	B1b	Negative	-0.0555289	-0.110408
TCGA-RS-A6TP-01	Other	B2a	Positive	0.157468	-0.124431
TCGA-T2-A6WX-01	Other	A	Negative	-0.461915	-0.00844232
TCGA-T2-A6WZ-01	Other	A	Negative	0.0558087	0.226975
TCGA-T2-A6X0-01	UCHL1-related	B2a	Positive	0.445026	-0.646526
TCGA-T2-A6X2-01	Other	A	Negative	-0.537745	0.678156
TCGA-T3-A92M-01	Other	B1b		0.321278	-0.647733
TCGA-T3-A92N-01	Other	A		-0.180593	-0.153772
TCGA-TN-A7HI-01	UCHL1-related	B2b	Negative	0.380451	-0.593606
TCGA-TN-A7HJ-01	Other	B1b	Negative	-0.345256	0.421092
TCGA-TN-A7HL-01	Other	B2a	Positive	0.0152114	-0.399859
TCGA-UF-A718-01	Other	B1b	Negative	0.103532	0.242674
TCGA-UF-A719-01	UCHL1-related	B1a	Negative	0.297318	-0.143733
TCGA-UF-A71A-01	UCHL1-related	B2b	Negative	0.514609	-0.623742
TCGA-UF-A71B-01	Other	B1b	Negative	0.213361	-0.36928
TCGA-UF-A71D-01	UCHL1-related	B1a	Negative	0.162137	-0.0751523
TCGA-UF-A71E-01	UCHL1-related	B2b	Negative	0.373088	-0.192199
TCGA-UF-A7J9-01	UCHL1-related	B2b	Negative	0.563086	-0.70896
TCGA-UF-A7JA-01	UCHL1-related	B2b	Negative	0.521582	-0.518887
TCGA-UF-A7JC-01	Other	A	Negative	-0.332211	0.72455
TCGA-UF-A7JD-01	UCHL1-related	B2b	Negative	0.327877	-0.675557
TCGA-UF-A7JF-01	UCHL1-related	B1a	Negative	0.271926	-0.193028
TCGA-UF-A7JH-01	UCHL1-related	B1a		-0.0808992	0.271636
TCGA-UF-A7JJ-01	Other	B1b	Negative	0.0547884	0.278756
TCGA-UF-A7JK-01	Other	A	Negative	-0.30275	0.261893
TCGA-UF-A7JO-01	Other	A	Negative	-0.134333	-0.438391
TCGA-UF-A7JS-01	Other	A	Negative	-0.0776833	0.0942715
TCGA-UF-A7JT-01	Other	A	Negative	-0.539056	0.35606
TCGA-UF-A7JV-01	Other	A	Negative	-0.363104	-0.0375486
TCGA-UP-A6WW-01	UCHL1-related	B2a	Positive	0.282561	-0.541922
TCGA-WA-A7GZ-01	Other	B1b	Negative	-0.136516	-0.168751
TCGA-WA-A7H4-01	Other	B1b	Negative	0.153279	-0.511572

## Sheet: Suppl. Fig. S5A-B
Source data Supplementary Fig. S5A-B: Stratification of TCGA PanCancer Atlas based on ML model with enrichment for UCHL1-related gene set.
Sample ID	Prediction	Type of cancer	Positive gene set [GSVA]	Negative gene set [GSVA]
TCGA-3C-AAAU-01	UCHL1-related	BRCA	0.107472	-0.240935
TCGA-3C-AALI-01	Other	BRCA	0.0463664	0.125863
TCGA-3C-AALJ-01	Other	BRCA	-0.0509433	-0.056629
TCGA-3C-AALK-01	Other	BRCA	0.0326512	0.0177823
TCGA-4H-AAAK-01	Other	BRCA	0.150168	0.0223905
TCGA-5L-AAT0-01	Other	BRCA	0.0166774	0.0303761
TCGA-5L-AAT1-01	Other	BRCA	-0.178585	0.17295
TCGA-5T-A9QA-01	UCHL1-related	BRCA	0.0362519	-0.0843218
TCGA-A1-A0SB-01	UCHL1-related	BRCA	0.379369	-0.0502253
TCGA-A1-A0SD-01	Other	BRCA	0.224825	0.112563
TCGA-A1-A0SE-01	Other	BRCA	0.263365	-0.262334
TCGA-A1-A0SF-01	Other	BRCA	0.0599384	-0.162702
TCGA-A1-A0SG-01	Other	BRCA	-0.0522196	0.0537624
TCGA-A1-A0SH-01	Other	BRCA	0.255643	0.210267
TCGA-A1-A0SI-01	Other	BRCA	0.0801272	0.298525
TCGA-A1-A0SJ-01	Other	BRCA	0.300393	-0.137985
TCGA-A1-A0SK-01	UCHL1-related	BRCA	0.458754	-0.246418
TCGA-A1-A0SM-01	Other	BRCA	0.224076	0.157428
TCGA-A1-A0SN-01	Other	BRCA	0.120029	-0.0407693
TCGA-A1-A0SO-01	UCHL1-related	BRCA	0.36282	-0.181917
TCGA-A1-A0SP-01	Other	BRCA	0.337419	0.073878
TCGA-A1-A0SQ-01	Other	BRCA	0.00463167	-0.084973
TCGA-A2-A04N-01	Other	BRCA	-0.0331184	-0.055164
TCGA-A2-A04P-01	Other	BRCA	-0.0260852	0.181467
TCGA-A2-A04Q-01	Other	BRCA	-0.208754	0.16318
TCGA-A2-A04R-01	Other	BRCA	0.144606	-0.266494
TCGA-A2-A04T-01	Other	BRCA	0.256896	0.0806377
TCGA-A2-A04U-01	UCHL1-related	BRCA	0.318677	0.0305816
TCGA-A2-A04V-01	Other	BRCA	-0.117595	-0.201032
TCGA-A2-A04W-01	Other	BRCA	0.155472	0.337109
TCGA-A2-A04X-01	Other	BRCA	-0.312476	0.0498997
TCGA-A2-A04Y-01	Other	BRCA	-0.223329	0.152031
TCGA-A2-A0CK-01	Other	BRCA	0.22551	-0.259627
TCGA-A2-A0CL-01	Other	BRCA	-0.239254	0.0984436
TCGA-A2-A0CM-01	Other	BRCA	-0.229213	0.264559
TCGA-A2-A0CO-01	Other	BRCA	0.0995809	0.0578658
TCGA-A2-A0CP-01	Other	BRCA	0.0954569	0.166244
TCGA-A2-A0CQ-01	Other	BRCA	-0.0788502	0.108582
TCGA-A2-A0CR-01	Other	BRCA	-0.0317672	0.112281
TCGA-A2-A0CS-01	Other	BRCA	0.104358	0.0401105
TCGA-A2-A0CT-01	UCHL1-related	BRCA	0.227576	-0.0164488
TCGA-A2-A0CU-01	Other	BRCA	0.294449	-0.188282
TCGA-A2-A0CV-01	Other	BRCA	0.0827891	0.124235
TCGA-A2-A0CW-01	Other	BRCA	-0.0318044	0.106213
TCGA-A2-A0CX-01	Other	BRCA	-0.0190615	0.323029
TCGA-A2-A0CY-01	UCHL1-related	BRCA	0.296922	0.127817
TCGA-A2-A0CZ-01	Other	BRCA	0.225696	0.0729933
TCGA-A2-A0D0-01	Other	BRCA	0.203002	0.311424
TCGA-A2-A0D1-01	UCHL1-related	BRCA	-0.0845222	-0.072493
TCGA-A2-A0D2-01	Other	BRCA	0.0255644	0.185381
TCGA-A2-A0D3-01	Other	BRCA	-0.195277	-0.0116225
TCGA-A2-A0D4-01	Other	BRCA	0.0779197	-0.257474
TCGA-A2-A0EM-01	Other	BRCA	0.101177	-0.114373
TCGA-A2-A0EN-01	Other	BRCA	-0.060119	0.0176625
TCGA-A2-A0EO-01	Other	BRCA	0.113062	0.172663
TCGA-A2-A0EP-01	Other	BRCA	-0.188505	0.00995442
TCGA-A2-A0EQ-01	Other	BRCA	-0.157933	-0.0664002
TCGA-A2-A0ER-01	Other	BRCA	0.0875584	-0.19966
TCGA-A2-A0ES-01	Other	BRCA	0.260953	0.0821516
TCGA-A2-A0ET-01	UCHL1-related	BRCA	-0.0606793	-0.281401
TCGA-A2-A0EU-01	Other	BRCA	-0.0184006	0.187106
TCGA-A2-A0EV-01	Other	BRCA	-0.127939	0.0197633
TCGA-A2-A0EW-01	Other	BRCA	0.253349	-0.112633
TCGA-A2-A0EX-01	Other	BRCA	0.100123	-0.108991
TCGA-A2-A0EY-01	Other	BRCA	-0.0803306	0.140383
TCGA-A2-A0ST-01	Other	BRCA	-0.0918089	0.220143
TCGA-A2-A0SU-01	Other	BRCA	0.173069	-0.0373948
TCGA-A2-A0SV-01	Other	BRCA	-0.264204	0.21625
TCGA-A2-A0SW-01	Other	BRCA	-0.234295	-0.159105
TCGA-A2-A0SX-01	Other	BRCA	0.232992	0.243305
TCGA-A2-A0SY-01	Other	BRCA	0.0462966	-0.268052
TCGA-A2-A0T0-01	Other	BRCA	0.0384653	0.270551
TCGA-A2-A0T1-01	Other	BRCA	-0.24705	0.358886
TCGA-A2-A0T2-01	Other	BRCA	0.00648753	0.467486
TCGA-A2-A0T3-01	Other	BRCA	0.13054	-0.327556
TCGA-A2-A0T4-01	Other	BRCA	0.218256	-0.0172104
TCGA-A2-A0T5-01	Other	BRCA	0.120442	0.252381
TCGA-A2-A0T6-01	Other	BRCA	-0.0450356	-0.220337
TCGA-A2-A0T7-01	Other	BRCA	0.297217	0.189807
TCGA-A2-A0YC-01	Other	BRCA	-0.181694	-0.17112
TCGA-A2-A0YD-01	Other	BRCA	0.0934932	0.202331
TCGA-A2-A0YE-01	Other	BRCA	0.409553	0.0430063
TCGA-A2-A0YF-01	Other	BRCA	-0.100642	-0.0760621
TCGA-A2-A0YG-01	Other	BRCA	-0.00278717	0.0734135
TCGA-A2-A0YH-01	Other	BRCA	0.106653	0.29958
TCGA-A2-A0YI-01	Other	BRCA	-0.0104603	-0.170614
TCGA-A2-A0YJ-01	Other	BRCA	0.232613	0.351777
TCGA-A2-A0YK-01	Other	BRCA	0.16128	0.127994
TCGA-A2-A0YL-01	Other	BRCA	0.179004	0.046514
TCGA-A2-A0YM-01	Other	BRCA	0.315999	0.261562
TCGA-A2-A0YT-01	Other	BRCA	-0.144654	0.0807303
TCGA-A2-A1FV-01	UCHL1-related	BRCA	0.201708	-0.306977
TCGA-A2-A1FW-01	Other	BRCA	0.144381	-0.224682
TCGA-A2-A1FX-01	UCHL1-related	BRCA	-0.044732	-0.0838526
TCGA-A2-A1FZ-01	Other	BRCA	0.048443	-0.0238897
TCGA-A2-A1G0-01	Other	BRCA	0.0466234	-0.190464
TCGA-A2-A1G1-01	Other	BRCA	-0.0979118	0.427127
TCGA-A2-A1G4-01	Other	BRCA	-0.121532	-0.269756
TCGA-A2-A1G6-01	Other	BRCA	0.226958	-0.067701
TCGA-A2-A259-01	Other	BRCA	-0.00484988	0.0468825
TCGA-A2-A25A-01	Other	BRCA	0.110256	-0.0555251
TCGA-A2-A25B-01	Other	BRCA	-0.146568	-0.0703768
TCGA-A2-A25C-01	Other	BRCA	0.0232086	-0.0340516
TCGA-A2-A25D-01	Other	BRCA	-0.343528	-0.0694401
TCGA-A2-A25E-01	UCHL1-related	BRCA	0.00850805	-0.27797
TCGA-A2-A25F-01	Other	BRCA	-0.145075	0.120707
TCGA-A2-A3KC-01	Other	BRCA	0.214699	-0.183563
TCGA-A2-A3KD-01	Other	BRCA	0.239453	-0.0271412
TCGA-A2-A3XS-01	Other	BRCA	0.229057	0.336239
TCGA-A2-A3XT-01	Other	BRCA	-0.117423	0.153292
TCGA-A2-A3XU-01	Other	BRCA	0.199381	0.243818
TCGA-A2-A3XV-01	Other	BRCA	-0.173337	0.12129
TCGA-A2-A3XW-01	Other	BRCA	-0.0219894	0.654365
TCGA-A2-A3XX-01	Other	BRCA	0.219461	0.314455
TCGA-A2-A3XY-01	Other	BRCA	0.0217608	0.322094
TCGA-A2-A3XZ-01	Other	BRCA	-0.0852623	0.0182045
TCGA-A2-A3Y0-01	Other	BRCA	-0.147879	0.651148
TCGA-A2-A4RW-01	Other	BRCA	0.0489979	0.00237525
TCGA-A2-A4RX-01	Other	BRCA	0.227476	0.519052
TCGA-A2-A4RY-01	Other	BRCA	0.281759	-0.0329296
TCGA-A2-A4S0-01	Other	BRCA	0.198885	-0.263305
TCGA-A2-A4S1-01	Other	BRCA	-0.0732905	0.0713958
TCGA-A2-A4S2-01	Other	BRCA	-0.0060429	0.22474
TCGA-A2-A4S3-01	UCHL1-related	BRCA	0.0830471	-0.0003848
TCGA-A7-A0CD-01	Other	BRCA	-0.051602	-0.134412
TCGA-A7-A0CE-01	Other	BRCA	0.271354	0.272935
TCGA-A7-A0CG-01	Other	BRCA	0.084654	0.0245724
TCGA-A7-A0CH-01	Other	BRCA	0.0462025	-0.0219753
TCGA-A7-A0CJ-01	UCHL1-related	BRCA	-0.0333772	0.0862286
TCGA-A7-A0D9-01	UCHL1-related	BRCA	0.201704	0.0883028
TCGA-A7-A0DA-01	Other	BRCA	0.234491	0.353607
TCGA-A7-A0DB-01	Other	BRCA	0.0233468	-0.111135
TCGA-A7-A0DC-01	UCHL1-related	BRCA	0.113597	-0.321048
TCGA-A7-A13D-01	Other	BRCA	0.26946	0.373665
TCGA-A7-A13E-01	Other	BRCA	0.191386	0.313675
TCGA-A7-A13F-01	Other	BRCA	0.0602955	0.222928
TCGA-A7-A13G-01	UCHL1-related	BRCA	-0.108157	-0.133602
TCGA-A7-A13H-01	Other	BRCA	0.0191498	-0.0108235
TCGA-A7-A26E-01	Other	BRCA	0.138647	-0.198888
TCGA-A7-A26F-01	Other	BRCA	-0.171528	0.6625
TCGA-A7-A26G-01	Other	BRCA	0.125574	0.152072
TCGA-A7-A26H-01	Other	BRCA	-0.0184963	0.0037823
TCGA-A7-A26I-01	Other	BRCA	0.123593	0.355673
TCGA-A7-A26J-01	Other	BRCA	-0.0196343	-0.165385
TCGA-A7-A2KD-01	UCHL1-related	BRCA	-0.0217317	-0.0305173
TCGA-A7-A3IY-01	Other	BRCA	0.0252203	0.135012
TCGA-A7-A3IZ-01	UCHL1-related	BRCA	0.0939615	-0.324315
TCGA-A7-A3J0-01	Other	BRCA	0.226358	-0.228396
TCGA-A7-A3J1-01	Other	BRCA	-0.018135	-0.171032
TCGA-A7-A3RF-01	Other	BRCA	0.171707	0.0353772
TCGA-A7-A425-01	Other	BRCA	-0.0314934	0.0641759
TCGA-A7-A426-01	Other	BRCA	0.152261	-0.0814427
TCGA-A7-A4SA-01	Other	BRCA	0.215462	-0.0522247
TCGA-A7-A4SB-01	Other	BRCA	0.159068	-0.121983
TCGA-A7-A4SC-01	Other	BRCA	0.113294	-0.0828281
TCGA-A7-A4SD-01	Other	BRCA	-0.0147492	0.344207
TCGA-A7-A4SE-01	Other	BRCA	0.294252	0.343081
TCGA-A7-A4SF-01	Other	BRCA	0.0743179	0.178716
TCGA-A7-A56D-01	Other	BRCA	0.10312	0.33841
TCGA-A7-A5ZV-01	Other	BRCA	0.130293	0.332295
TCGA-A7-A5ZW-01	Other	BRCA	0.0101258	0.0264502
TCGA-A7-A5ZX-01	Other	BRCA	0.243373	-0.112466
TCGA-A7-A6VV-01	Other	BRCA	-0.0746539	0.344316
TCGA-A7-A6VW-01	Other	BRCA	0.0151043	0.487018
TCGA-A7-A6VX-01	Other	BRCA	0.154773	0.0093676
TCGA-A7-A6VY-01	Other	BRCA	-0.0496825	0.533791
TCGA-A8-A06N-01	UCHL1-related	BRCA	-0.00576632	-0.325828
TCGA-A8-A06O-01	Other	BRCA	-0.190994	-0.360858
TCGA-A8-A06P-01	Other	BRCA	-0.102007	0.0417631
TCGA-A8-A06Q-01	Other	BRCA	-0.0126321	-0.192498
TCGA-A8-A06R-01	Other	BRCA	-0.0329317	0.101097
TCGA-A8-A06T-01	Other	BRCA	-0.295337	-0.208384
TCGA-A8-A06U-01	Other	BRCA	-0.155098	-0.141925
TCGA-A8-A06X-01	Other	BRCA	-0.0845284	-0.0886325
TCGA-A8-A06Y-01	UCHL1-related	BRCA	0.168868	-0.163617
TCGA-A8-A06Z-01	Other	BRCA	-0.0454404	-0.169345
TCGA-A8-A075-01	Other	BRCA	-0.241412	0.0395352
TCGA-A8-A076-01	Other	BRCA	-0.154148	-0.126266
TCGA-A8-A079-01	Other	BRCA	0.0172307	-0.0762233
TCGA-A8-A07B-01	UCHL1-related	BRCA	0.21197	0.255638
TCGA-A8-A07C-01	UCHL1-related	BRCA	0.230707	-0.251314
TCGA-A8-A07E-01	Other	BRCA	0.0355159	0.020955
TCGA-A8-A07F-01	Other	BRCA	-0.0709888	-0.244957
TCGA-A8-A07G-01	Other	BRCA	0.242768	0.209839
TCGA-A8-A07I-01	Other	BRCA	-0.235817	0.0343348
TCGA-A8-A07J-01	Other	BRCA	0.0621251	0.17586
TCGA-A8-A07L-01	Other	BRCA	0.280981	-0.246723
TCGA-A8-A07O-01	Other	BRCA	0.0876533	0.167081
TCGA-A8-A07P-01	Other	BRCA	-0.0653712	-0.249505
TCGA-A8-A07R-01	Other	BRCA	0.227712	0.292916
TCGA-A8-A07S-01	Other	BRCA	-0.0106375	0.125821
TCGA-A8-A07U-01	Other	BRCA	-0.159027	0.423703
TCGA-A8-A07W-01	Other	BRCA	-0.0175131	-0.21006
TCGA-A8-A07Z-01	Other	BRCA	0.0333258	0.155803
TCGA-A8-A081-01	UCHL1-related	BRCA	-0.115453	-0.0487511
TCGA-A8-A082-01	Other	BRCA	0.110751	-0.132699
TCGA-A8-A083-01	Other	BRCA	-0.0772826	0.108197
TCGA-A8-A084-01	Other	BRCA	-0.112238	0.314974
TCGA-A8-A085-01	Other	BRCA	-0.129092	-0.359201
TCGA-A8-A086-01	Other	BRCA	0.0942284	-0.145263
TCGA-A8-A08A-01	Other	BRCA	-0.00749004	-0.132884
TCGA-A8-A08B-01	UCHL1-related	BRCA	0.0304679	0.318809
TCGA-A8-A08C-01	Other	BRCA	-0.0269838	-0.181164
TCGA-A8-A08F-01	Other	BRCA	0.0146864	0.0643141
TCGA-A8-A08G-01	Other	BRCA	-0.110001	-0.266588
TCGA-A8-A08H-01	Other	BRCA	-0.214299	0.213792
TCGA-A8-A08I-01	Other	BRCA	0.0953955	-0.0522951
TCGA-A8-A08J-01	Other	BRCA	-0.100839	0.152637
TCGA-A8-A08L-01	Other	BRCA	0.116116	-0.0475133
TCGA-A8-A08O-01	Other	BRCA	0.169827	-0.234618
TCGA-A8-A08P-01	Other	BRCA	-0.307926	0.212728
TCGA-A8-A08R-01	Other	BRCA	0.171299	0.25344
TCGA-A8-A08S-01	Other	BRCA	-0.0327538	0.1197
TCGA-A8-A08T-01	UCHL1-related	BRCA	0.00755235	-0.244416
TCGA-A8-A08X-01	Other	BRCA	-0.206891	0.304159
TCGA-A8-A08Z-01	Other	BRCA	-0.131546	-0.197849
TCGA-A8-A090-01	Other	BRCA	-0.120056	0.101097
TCGA-A8-A091-01	UCHL1-related	BRCA	0.111444	-0.358414
TCGA-A8-A092-01	Other	BRCA	-0.046714	-0.0713765
TCGA-A8-A093-01	Other	BRCA	-0.00796961	-0.143828
TCGA-A8-A094-01	Other	BRCA	-0.205177	0.252541
TCGA-A8-A095-01	Other	BRCA	0.00287669	-0.0256937
TCGA-A8-A096-01	Other	BRCA	-0.27054	0.247528
TCGA-A8-A097-01	Other	BRCA	-0.0898461	0.0740444
TCGA-A8-A099-01	UCHL1-related	BRCA	-0.00509944	0.184836
TCGA-A8-A09A-01	Other	BRCA	0.12407	-0.177104
TCGA-A8-A09B-01	Other	BRCA	0.0170623	-0.0151517
TCGA-A8-A09C-01	UCHL1-related	BRCA	-0.0976464	-0.255776
TCGA-A8-A09D-01	Other	BRCA	0.0515104	-0.218802
TCGA-A8-A09E-01	Other	BRCA	-0.050503	0.0720383
TCGA-A8-A09G-01	Other	BRCA	-0.0840179	-0.0434099
TCGA-A8-A09I-01	Other	BRCA	-0.241704	0.19471
TCGA-A8-A09K-01	Other	BRCA	-0.0596322	-0.360163
TCGA-A8-A09M-01	Other	BRCA	-0.048837	-0.0727899
TCGA-A8-A09N-01	Other	BRCA	-0.0504186	0.0996368
TCGA-A8-A09Q-01	Other	BRCA	-0.166841	-0.335739
TCGA-A8-A09R-01	Other	BRCA	0.207699	0.257022
TCGA-A8-A09T-01	Other	BRCA	0.162255	0.147209
TCGA-A8-A09V-01	Other	BRCA	0.132285	-0.188354
TCGA-A8-A09W-01	Other	BRCA	7.82634e-05	0.00662871
TCGA-A8-A09X-01	Other	BRCA	-0.241002	0.106938
TCGA-A8-A09Z-01	Other	BRCA	-0.299236	0.127906
TCGA-A8-A0A1-01	Other	BRCA	-0.0645657	0.0693189
TCGA-A8-A0A2-01	Other	BRCA	-0.228441	-0.252554
TCGA-A8-A0A4-01	UCHL1-related	BRCA	0.198289	-0.387323
TCGA-A8-A0A6-01	Other	BRCA	-0.00833478	0.0772857
TCGA-A8-A0A7-01	Other	BRCA	-0.231596	0.277687
TCGA-A8-A0A9-01	Other	BRCA	-0.196253	-0.169775
TCGA-A8-A0AB-01	Other	BRCA	0.090311	-0.281513
TCGA-A8-A0AD-01	Other	BRCA	0.00551062	0.0847855
TCGA-AC-A23C-01	Other	BRCA	-0.101937	0.0418021
TCGA-AC-A23E-01	Other	BRCA	0.0133303	-0.034908
TCGA-AC-A23G-01	Other	BRCA	0.232212	0.286588
TCGA-AC-A23H-01	Other	BRCA	-0.0653705	0.339075
TCGA-AC-A2B8-01	Other	BRCA	0.0402599	0.11955
TCGA-AC-A2BK-01	Other	BRCA	0.405324	-0.0841312
TCGA-AC-A2BM-01	UCHL1-related	BRCA	0.0545328	-0.27176
TCGA-AC-A2FB-01	Other	BRCA	-0.0376748	0.240267
TCGA-AC-A2FE-01	Other	BRCA	0.0616069	0.131914
TCGA-AC-A2FF-01	Other	BRCA	0.100458	-0.180754
TCGA-AC-A2FG-01	Other	BRCA	0.155757	-0.00565496
TCGA-AC-A2FK-01	Other	BRCA	0.284282	0.222095
TCGA-AC-A2FM-01	Other	BRCA	0.029704	-0.360965
TCGA-AC-A2FO-01	Other	BRCA	0.0909247	-0.172541
TCGA-AC-A2QH-01	UCHL1-related	BRCA	0.390953	-0.27629
TCGA-AC-A2QI-01	Other	BRCA	-0.0720852	-0.133943
TCGA-AC-A2QJ-01	Other	BRCA	-0.0917362	0.519885
TCGA-AC-A3BB-01	Other	BRCA	-0.0458274	0.0528493
TCGA-AC-A3EH-01	Other	BRCA	-0.0431082	0.155675
TCGA-AC-A3HN-01	Other	BRCA	-0.0509295	-0.110269
TCGA-AC-A3OD-01	Other	BRCA	-0.0112257	-0.303049
TCGA-AC-A3QP-01	Other	BRCA	-0.102208	0.11118
TCGA-AC-A3QQ-01	Other	BRCA	0.0310225	0.158638
TCGA-AC-A3TM-01	Other	BRCA	0.0800319	0.180767
TCGA-AC-A3TN-01	Other	BRCA	-0.029719	-0.0600113
TCGA-AC-A3W5-01	Other	BRCA	-0.0691645	0.303828
TCGA-AC-A3W6-01	Other	BRCA	0.0212812	-0.118824
TCGA-AC-A3W7-01	Other	BRCA	0.131787	0.148424
TCGA-AC-A3YI-01	Other	BRCA	0.0875398	0.33098
TCGA-AC-A3YJ-01	Other	BRCA	0.0878286	-0.0874855
TCGA-AC-A4ZE-01	UCHL1-related	BRCA	-0.0161386	-0.29893
TCGA-AC-A5EH-01	Other	BRCA	-0.127718	0.389178
TCGA-AC-A5XS-01	Other	BRCA	-0.152735	0.207314
TCGA-AC-A5XU-01	Other	BRCA	0.228732	-0.242194
TCGA-AC-A62V-01	Other	BRCA	-0.0049287	0.0785466
TCGA-AC-A62X-01	Other	BRCA	0.258298	0.364629
TCGA-AC-A62Y-01	Other	BRCA	-0.17335	0.19138
TCGA-AC-A6IV-01	Other	BRCA	0.0521132	-0.258955
TCGA-AC-A6IW-01	Other	BRCA	-0.0391028	0.16937
TCGA-AC-A6IX-01	Other	BRCA	0.0891851	-0.161114
TCGA-AC-A6NO-01	UCHL1-related	BRCA	-0.145816	-0.207423
TCGA-AC-A7VB-01	UCHL1-related	BRCA	-0.110351	-0.195715
TCGA-AC-A7VC-01	Other	BRCA	0.00427757	-0.0943153
TCGA-AC-A8OP-01	Other	BRCA	0.0613476	-0.266846
TCGA-AC-A8OQ-01	Other	BRCA	0.0585157	-0.0619981
TCGA-AC-A8OR-01	Other	BRCA	0.13971	-0.128222
TCGA-AC-A8OS-01	Other	BRCA	-0.0443944	-0.170843
TCGA-AN-A03X-01	Other	BRCA	0.247559	0.332032
TCGA-AN-A03Y-01	UCHL1-related	BRCA	-0.180425	-0.213355
TCGA-AN-A041-01	Other	BRCA	-0.0351307	-0.234861
TCGA-AN-A046-01	Other	BRCA	-0.320176	0.0690691
TCGA-AN-A049-01	Other	BRCA	-0.255497	0.00325216
TCGA-AN-A04A-01	Other	BRCA	0.193521	0.212878
TCGA-AN-A04C-01	Other	BRCA	-0.201772	0.191017
TCGA-AN-A04D-01	UCHL1-related	BRCA	0.301001	0.0251633
TCGA-AN-A0AJ-01	Other	BRCA	-0.21651	-0.202612
TCGA-AN-A0AK-01	Other	BRCA	-0.176329	-0.188509
TCGA-AN-A0AL-01	Other	BRCA	0.133778	0.379955
TCGA-AN-A0AM-01	Other	BRCA	-0.0257157	0.272479
TCGA-AN-A0AR-01	UCHL1-related	BRCA	0.295349	-0.0505395
TCGA-AN-A0AS-01	Other	BRCA	-0.124688	0.0819147
TCGA-AN-A0AT-01	Other	BRCA	0.243611	-0.0442769
TCGA-AN-A0FD-01	Other	BRCA	0.195004	-0.14253
TCGA-AN-A0FF-01	Other	BRCA	-0.0545884	-0.194038
TCGA-AN-A0FJ-01	UCHL1-related	BRCA	0.427238	-0.0820437
TCGA-AN-A0FK-01	Other	BRCA	-0.0251529	-0.0165295
TCGA-AN-A0FL-01	Other	BRCA	0.273784	0.270912
TCGA-AN-A0FN-01	Other	BRCA	-0.0402852	-0.0493899
TCGA-AN-A0FS-01	Other	BRCA	0.136892	0.00522209
TCGA-AN-A0FT-01	Other	BRCA	-0.120247	0.107108
TCGA-AN-A0FV-01	Other	BRCA	0.145075	0.167019
TCGA-AN-A0FW-01	Other	BRCA	-0.0968131	-0.394509
TCGA-AN-A0FX-01	Other	BRCA	0.341065	0.144245
TCGA-AN-A0FY-01	Other	BRCA	-0.00123009	-0.238925
TCGA-AN-A0FZ-01	Other	BRCA	-0.0597387	-0.132322
TCGA-AN-A0G0-01	Other	BRCA	0.196004	0.126317
TCGA-AN-A0XL-01	Other	BRCA	0.174264	-0.204408
TCGA-AN-A0XN-01	Other	BRCA	0.067798	0.139556
TCGA-AN-A0XO-01	Other	BRCA	0.146558	0.212411
TCGA-AN-A0XP-01	Other	BRCA	-0.231067	0.221777
TCGA-AN-A0XR-01	Other	BRCA	0.0432352	-0.0652188
TCGA-AN-A0XS-01	Other	BRCA	-0.16377	-0.231674
TCGA-AN-A0XT-01	Other	BRCA	0.0464597	-0.229794
TCGA-AN-A0XU-01	UCHL1-related	BRCA	0.280873	0.219738
TCGA-AN-A0XV-01	UCHL1-related	BRCA	-0.0276683	-0.0967063
TCGA-AN-A0XW-01	Other	BRCA	0.100788	0.239415
TCGA-AO-A03L-01	Other	BRCA	-0.132827	-0.0342182
TCGA-AO-A03M-01	Other	BRCA	-0.0830237	0.124142
TCGA-AO-A03N-01	UCHL1-related	BRCA	0.0795858	0.194659
TCGA-AO-A03O-01	Other	BRCA	-0.0952203	-0.0576132
TCGA-AO-A03P-01	UCHL1-related	BRCA	-0.162336	-0.101597
TCGA-AO-A03R-01	Other	BRCA	0.0159104	-0.00148692
TCGA-AO-A03T-01	Other	BRCA	0.178118	0.142248
TCGA-AO-A03U-01	Other	BRCA	-0.0627285	0.482279
TCGA-AO-A03V-01	Other	BRCA	0.102736	-0.16969
TCGA-AO-A0J2-01	Other	BRCA	0.0147655	0.282047
TCGA-AO-A0J3-01	UCHL1-related	BRCA	0.188645	-0.298438
TCGA-AO-A0J4-01	Other	BRCA	0.201925	0.325557
TCGA-AO-A0J5-01	Other	BRCA	0.166421	-0.195643
TCGA-AO-A0J6-01	Other	BRCA	0.149618	0.419768
TCGA-AO-A0J7-01	UCHL1-related	BRCA	-0.0153767	-0.195507
TCGA-AO-A0J8-01	Other	BRCA	-0.10987	0.0710841
TCGA-AO-A0J9-01	Other	BRCA	0.0517563	-0.117276
TCGA-AO-A0JA-01	Other	BRCA	0.0993563	0.135281
TCGA-AO-A0JB-01	Other	BRCA	0.0110529	0.0405499
TCGA-AO-A0JC-01	Other	BRCA	-0.293477	-0.0108824
TCGA-AO-A0JD-01	Other	BRCA	0.0193306	0.210268
TCGA-AO-A0JE-01	Other	BRCA	-0.258952	0.466613
TCGA-AO-A0JF-01	Other	BRCA	0.0707178	0.0517636
TCGA-AO-A0JG-01	Other	BRCA	0.0935231	-0.289994
TCGA-AO-A0JI-01	UCHL1-related	BRCA	0.274657	-0.303224
TCGA-AO-A0JJ-01	Other	BRCA	0.190825	0.070105
TCGA-AO-A0JL-01	UCHL1-related	BRCA	0.258533	0.0345037
TCGA-AO-A0JM-01	Other	BRCA	-0.139576	0.0871674
TCGA-AO-A124-01	Other	BRCA	0.248769	0.269365
TCGA-AO-A125-01	UCHL1-related	BRCA	-0.0548652	0.0654781
TCGA-AO-A126-01	Other	BRCA	0.0673986	-0.0658061
TCGA-AO-A128-01	Other	BRCA	-0.284245	0.22024
TCGA-AO-A129-01	Other	BRCA	0.15075	0.122861
TCGA-AO-A12A-01	Other	BRCA	0.0673445	-0.140051
TCGA-AO-A12B-01	UCHL1-related	BRCA	0.0901878	0.0948042
TCGA-AO-A12C-01	Other	BRCA	0.149378	-0.323582
TCGA-AO-A12D-01	Other	BRCA	-0.0935264	0.435588
TCGA-AO-A12E-01	Other	BRCA	0.112631	-0.0649983
TCGA-AO-A12F-01	UCHL1-related	BRCA	0.233644	-0.0164145
TCGA-AO-A12G-01	Other	BRCA	-0.00314421	-0.0818029
TCGA-AO-A12H-01	Other	BRCA	0.094054	-0.163887
TCGA-AO-A1KO-01	UCHL1-related	BRCA	0.287792	0.096331
TCGA-AO-A1KP-01	UCHL1-related	BRCA	-0.00669418	-0.203805
TCGA-AO-A1KQ-01	Other	BRCA	-0.132724	-0.065349
TCGA-AO-A1KR-01	UCHL1-related	BRCA	0.134538	0.232894
TCGA-AO-A1KS-01	UCHL1-related	BRCA	0.143028	-0.238477
TCGA-AO-A1KT-01	Other	BRCA	0.0351647	0.0181375
TCGA-AQ-A04H-01	Other	BRCA	-0.0184053	-0.311213
TCGA-AQ-A04J-01	Other	BRCA	0.176452	0.252441
TCGA-AQ-A04L-01	Other	BRCA	-0.123723	0.118294
TCGA-AQ-A0Y5-01	Other	BRCA	0.121361	0.249114
TCGA-AQ-A1H2-01	Other	BRCA	0.120974	-0.105401
TCGA-AQ-A1H3-01	Other	BRCA	0.0170468	-0.16122
TCGA-AQ-A54N-01	UCHL1-related	BRCA	0.332298	0.124278
TCGA-AQ-A54O-01	Other	BRCA	0.224986	0.118414
TCGA-AQ-A7U7-01	Other	BRCA	-0.175896	-0.00587809
TCGA-AR-A0TP-01	UCHL1-related	BRCA	0.381329	-0.0777212
TCGA-AR-A0TQ-01	Other	BRCA	-0.0933897	-0.161724
TCGA-AR-A0TR-01	UCHL1-related	BRCA	-0.0823821	-0.3458
TCGA-AR-A0TS-01	Other	BRCA	0.129441	0.229988
TCGA-AR-A0TT-01	Other	BRCA	-0.249446	-0.00633248
TCGA-AR-A0TU-01	Other	BRCA	0.226743	0.0841754
TCGA-AR-A0TV-01	Other	BRCA	-0.0841484	-0.278642
TCGA-AR-A0TW-01	Other	BRCA	-0.115539	-0.0611524
TCGA-AR-A0TX-01	Other	BRCA	0.0694755	0.0503295
TCGA-AR-A0TY-01	Other	BRCA	-0.172881	-0.00440025
TCGA-AR-A0TZ-01	UCHL1-related	BRCA	0.08304	-0.302788
TCGA-AR-A0U0-01	Other	BRCA	-0.312922	0.50251
TCGA-AR-A0U1-01	Other	BRCA	0.0628521	0.355939
TCGA-AR-A0U2-01	Other	BRCA	0.157588	-0.123971
TCGA-AR-A0U3-01	UCHL1-related	BRCA	0.123423	0.000510478
TCGA-AR-A0U4-01	Other	BRCA	0.144651	0.0503496
TCGA-AR-A1AH-01	Other	BRCA	0.0757731	0.0167067
TCGA-AR-A1AI-01	Other	BRCA	-0.00529665	0.198099
TCGA-AR-A1AJ-01	Other	BRCA	-0.0859699	0.304997
TCGA-AR-A1AK-01	Other	BRCA	0.100861	0.0188199
TCGA-AR-A1AL-01	Other	BRCA	0.195497	-0.13799
TCGA-AR-A1AM-01	Other	BRCA	0.151656	-0.115787
TCGA-AR-A1AN-01	Other	BRCA	-0.00176494	-0.200515
TCGA-AR-A1AO-01	Other	BRCA	-0.138779	0.447346
TCGA-AR-A1AP-01	Other	BRCA	-0.0251673	0.223746
TCGA-AR-A1AQ-01	Other	BRCA	0.0744124	0.244828
TCGA-AR-A1AR-01	Other	BRCA	-0.169967	0.0467029
TCGA-AR-A1AS-01	Other	BRCA	-0.202415	0.288974
TCGA-AR-A1AT-01	Other	BRCA	-0.0303233	0.229386
TCGA-AR-A1AU-01	Other	BRCA	0.257918	-0.0672557
TCGA-AR-A1AV-01	Other	BRCA	-0.111746	-0.119378
TCGA-AR-A1AW-01	Other	BRCA	-0.284625	-0.156855
TCGA-AR-A1AX-01	Other	BRCA	-0.136162	0.0310588
TCGA-AR-A1AY-01	Other	BRCA	0.300554	0.132849
TCGA-AR-A24H-01	UCHL1-related	BRCA	-0.0714085	-0.229195
TCGA-AR-A24K-01	UCHL1-related	BRCA	-0.165145	-0.271814
TCGA-AR-A24L-01	Other	BRCA	0.265011	-0.192419
TCGA-AR-A24M-01	Other	BRCA	0.154674	0.0377417
TCGA-AR-A24N-01	UCHL1-related	BRCA	-0.0534657	0.131747
TCGA-AR-A24O-01	Other	BRCA	0.0881279	-0.0523612
TCGA-AR-A24P-01	Other	BRCA	0.119542	-0.0651456
TCGA-AR-A24Q-01	Other	BRCA	0.299854	-0.0138084
TCGA-AR-A24R-01	Other	BRCA	-0.024293	-0.164358
TCGA-AR-A24S-01	Other	BRCA	-0.230053	-0.0568245
TCGA-AR-A24T-01	Other	BRCA	0.128331	-0.142061
TCGA-AR-A24U-01	Other	BRCA	-0.227282	0.433009
TCGA-AR-A24V-01	Other	BRCA	0.0723701	0.148913
TCGA-AR-A24W-01	Other	BRCA	0.275129	0.0685414
TCGA-AR-A24X-01	Other	BRCA	-0.10095	-0.157582
TCGA-AR-A24Z-01	UCHL1-related	BRCA	0.119372	-0.10876
TCGA-AR-A250-01	Other	BRCA	-0.0734032	-0.16808
TCGA-AR-A251-01	Other	BRCA	0.159331	0.326393
TCGA-AR-A252-01	Other	BRCA	0.0811457	-0.061181
TCGA-AR-A254-01	Other	BRCA	-0.134135	0.317648
TCGA-AR-A255-01	Other	BRCA	-0.120248	0.0903608
TCGA-AR-A256-01	Other	BRCA	0.134289	0.251519
TCGA-AR-A2LE-01	Other	BRCA	-0.194255	-0.212085
TCGA-AR-A2LH-01	Other	BRCA	-0.146022	0.464004
TCGA-AR-A2LJ-01	Other	BRCA	-0.0293895	-0.0115713
TCGA-AR-A2LK-01	Other	BRCA	-0.0345982	-0.281641
TCGA-AR-A2LL-01	Other	BRCA	-0.084945	-0.239803
TCGA-AR-A2LM-01	Other	BRCA	0.226473	-0.216292
TCGA-AR-A2LN-01	Other	BRCA	0.153059	-0.0601044
TCGA-AR-A2LO-01	Other	BRCA	0.109717	-0.0449293
TCGA-AR-A2LQ-01	Other	BRCA	0.233839	0.212505
TCGA-AR-A2LR-01	UCHL1-related	BRCA	0.417256	-0.234919
TCGA-AR-A5QM-01	Other	BRCA	-0.0622634	0.0763056
TCGA-AR-A5QN-01	Other	BRCA	0.061919	0.232604
TCGA-AR-A5QP-01	Other	BRCA	0.102926	0.048958
TCGA-AR-A5QQ-01	Other	BRCA	-0.426517	0.738474
TCGA-B6-A0I1-01	UCHL1-related	BRCA	0.274637	0.24253
TCGA-B6-A0I2-01	Other	BRCA	-0.148821	0.379635
TCGA-B6-A0I5-01	Other	BRCA	-0.0327911	0.251765
TCGA-B6-A0I6-01	Other	BRCA	0.331224	0.122211
TCGA-B6-A0I8-01	Other	BRCA	0.0579287	0.00913637
TCGA-B6-A0I9-01	Other	BRCA	-0.258847	-0.0307415
TCGA-B6-A0IA-01	Other	BRCA	0.00862268	0.10529
TCGA-B6-A0IB-01	UCHL1-related	BRCA	0.183623	-0.108982
TCGA-B6-A0IC-01	Other	BRCA	-0.0254209	-0.230956
TCGA-B6-A0IE-01	Other	BRCA	-0.0637081	-0.0586973
TCGA-B6-A0IG-01	Other	BRCA	-0.170615	0.105985
TCGA-B6-A0IH-01	Other	BRCA	0.212719	-0.0367315
TCGA-B6-A0IJ-01	Other	BRCA	0.030031	0.284091
TCGA-B6-A0IK-01	Other	BRCA	-0.0203755	0.444999
TCGA-B6-A0IM-01	Other	BRCA	0.206314	-0.224148
TCGA-B6-A0IN-01	Other	BRCA	0.0793733	-0.13246
TCGA-B6-A0IO-01	Other	BRCA	0.102601	-0.156965
TCGA-B6-A0IP-01	Other	BRCA	-0.0996003	-0.223574
TCGA-B6-A0IQ-01	UCHL1-related	BRCA	0.243397	0.00374875
TCGA-B6-A0RE-01	Other	BRCA	0.287454	0.391141
TCGA-B6-A0RG-01	Other	BRCA	0.147227	0.189908
TCGA-B6-A0RH-01	Other	BRCA	-0.0868399	0.377104
TCGA-B6-A0RI-01	Other	BRCA	-0.0391116	0.157045
TCGA-B6-A0RL-01	UCHL1-related	BRCA	-0.0057079	-0.301567
TCGA-B6-A0RM-01	Other	BRCA	0.00255133	-0.272453
TCGA-B6-A0RN-01	Other	BRCA	0.115533	-0.086655
TCGA-B6-A0RO-01	UCHL1-related	BRCA	0.148151	-0.173998
TCGA-B6-A0RP-01	Other	BRCA	-0.0381019	-0.214844
TCGA-B6-A0RQ-01	Other	BRCA	0.306494	0.207936
TCGA-B6-A0RS-01	Other	BRCA	-0.215272	0.360714
TCGA-B6-A0RT-01	Other	BRCA	-0.122449	0.204166
TCGA-B6-A0RU-01	UCHL1-related	BRCA	0.363774	0.151917
TCGA-B6-A0RV-01	Other	BRCA	0.0835572	-0.14953
TCGA-B6-A0WS-01	Other	BRCA	-0.0778173	-0.0271852
TCGA-B6-A0WT-01	Other	BRCA	0.173361	-0.113957
TCGA-B6-A0WV-01	Other	BRCA	-0.00951309	-0.104679
TCGA-B6-A0WW-01	Other	BRCA	-0.0411301	0.0595836
TCGA-B6-A0WX-01	Other	BRCA	0.289365	0.251796
TCGA-B6-A0WY-01	Other	BRCA	0.207714	0.226351
TCGA-B6-A0WZ-01	Other	BRCA	-0.0932597	0.269706
TCGA-B6-A0X0-01	UCHL1-related	BRCA	0.192175	-0.0200851
TCGA-B6-A0X1-01	Other	BRCA	0.230337	0.327894
TCGA-B6-A0X4-01	Other	BRCA	0.131337	-0.0341763
TCGA-B6-A0X5-01	UCHL1-related	BRCA	0.0917485	0.14454
TCGA-B6-A0X7-01	Other	BRCA	0.150151	-0.180944
TCGA-B6-A1KC-01	UCHL1-related	BRCA	0.204567	-0.268322
TCGA-B6-A1KF-01	Other	BRCA	0.203577	0.251268
TCGA-B6-A1KI-01	Other	BRCA	0.0407613	-0.130822
TCGA-B6-A1KN-01	Other	BRCA	-0.203515	0.234777
TCGA-B6-A2IU-01	Other	BRCA	0.0913643	-0.0779893
TCGA-B6-A3ZX-01	Other	BRCA	0.185546	0.075687
TCGA-B6-A400-01	Other	BRCA	0.303109	0.128635
TCGA-B6-A401-01	Other	BRCA	-0.0560348	0.382514
TCGA-B6-A402-01	UCHL1-related	BRCA	0.155286	0.280856
TCGA-B6-A408-01	UCHL1-related	BRCA	-0.0881229	-0.0198804
TCGA-B6-A409-01	Other	BRCA	0.0190618	0.467759
TCGA-B6-A40B-01	Other	BRCA	-0.0574047	0.269526
TCGA-B6-A40C-01	Other	BRCA	-0.127379	-0.134352
TCGA-BH-A0AU-01	Other	BRCA	0.194977	-0.164861
TCGA-BH-A0AV-01	Other	BRCA	0.213806	0.251628
TCGA-BH-A0AW-01	Other	BRCA	-0.0658973	0.211826
TCGA-BH-A0AY-01	Other	BRCA	-0.0316449	0.0258462
TCGA-BH-A0AZ-01	Other	BRCA	0.258871	0.136614
TCGA-BH-A0B0-01	Other	BRCA	0.0521056	0.238211
TCGA-BH-A0B1-01	Other	BRCA	0.137772	0.214102
TCGA-BH-A0B3-01	Other	BRCA	-0.0248192	0.47922
TCGA-BH-A0B4-01	Other	BRCA	0.123999	0.0118264
TCGA-BH-A0B5-01	Other	BRCA	0.0519429	-0.114156
TCGA-BH-A0B6-01	Other	BRCA	-0.152481	0.276129
TCGA-BH-A0B7-01	Other	BRCA	0.0699005	0.26998
TCGA-BH-A0B8-01	Other	BRCA	0.281112	0.111225
TCGA-BH-A0B9-01	Other	BRCA	0.237263	-0.0338367
TCGA-BH-A0BA-01	UCHL1-related	BRCA	0.14173	-0.0777835
TCGA-BH-A0BC-01	Other	BRCA	0.0223869	0.160485
TCGA-BH-A0BD-01	Other	BRCA	0.0912745	0.218535
TCGA-BH-A0BF-01	Other	BRCA	-0.243003	0.24764
TCGA-BH-A0BG-01	Other	BRCA	0.135748	0.196136
TCGA-BH-A0BJ-01	Other	BRCA	0.124945	-0.0878859
TCGA-BH-A0BL-01	Other	BRCA	0.28482	0.357672
TCGA-BH-A0BM-01	Other	BRCA	0.157612	0.104397
TCGA-BH-A0BO-01	Other	BRCA	0.156264	0.266515
TCGA-BH-A0BP-01	Other	BRCA	0.167547	0.0230848
TCGA-BH-A0BQ-01	Other	BRCA	0.0719756	0.294396
TCGA-BH-A0BR-01	Other	BRCA	-0.117931	0.238204
TCGA-BH-A0BS-01	Other	BRCA	-0.0639487	0.151013
TCGA-BH-A0BT-01	Other	BRCA	-0.0964175	0.0543236
TCGA-BH-A0BV-01	Other	BRCA	-0.105579	-0.302166
TCGA-BH-A0BW-01	Other	BRCA	0.0444189	0.325228
TCGA-BH-A0BZ-01	Other	BRCA	-0.24398	0.0956573
TCGA-BH-A0C0-01	Other	BRCA	-0.23533	0.288002
TCGA-BH-A0C1-01	Other	BRCA	0.0801917	-0.022958
TCGA-BH-A0C3-01	Other	BRCA	0.0311074	0.0208542
TCGA-BH-A0C7-01	Other	BRCA	0.132944	0.0839626
TCGA-BH-A0DD-01	UCHL1-related	BRCA	0.0813941	-0.163389
TCGA-BH-A0DE-01	Other	BRCA	0.0866196	0.158104
TCGA-BH-A0DG-01	Other	BRCA	0.123901	-0.0951142
TCGA-BH-A0DH-01	Other	BRCA	0.0468229	-0.130793
TCGA-BH-A0DI-01	Other	BRCA	0.129762	0.131419
TCGA-BH-A0DK-01	Other	BRCA	0.072365	0.254818
TCGA-BH-A0DL-01	Other	BRCA	-0.318397	0.688124
TCGA-BH-A0DO-01	Other	BRCA	0.208056	-0.202396
TCGA-BH-A0DP-01	Other	BRCA	0.204283	0.101553
TCGA-BH-A0DQ-01	Other	BRCA	0.055999	-0.208745
TCGA-BH-A0DS-01	Other	BRCA	-0.169845	0.0933907
TCGA-BH-A0DT-01	Other	BRCA	-0.0839337	-0.0563585
TCGA-BH-A0DV-01	Other	BRCA	0.252132	0.184989
TCGA-BH-A0DX-01	Other	BRCA	-0.0813011	0.210673
TCGA-BH-A0DZ-01	Other	BRCA	-0.0253172	0.308222
TCGA-BH-A0E0-01	Other	BRCA	-0.00168469	0.454913
TCGA-BH-A0E1-01	Other	BRCA	0.184217	-0.160448
TCGA-BH-A0E2-01	Other	BRCA	0.0697929	-0.0807957
TCGA-BH-A0E6-01	UCHL1-related	BRCA	0.239587	0.268875
TCGA-BH-A0E7-01	Other	BRCA	-0.00385855	-0.0484909
TCGA-BH-A0E9-01	Other	BRCA	0.306573	-0.0385552
TCGA-BH-A0EA-01	Other	BRCA	0.285531	0.00608574
TCGA-BH-A0EB-01	Other	BRCA	-0.184902	0.159863
TCGA-BH-A0EE-01	Other	BRCA	-0.0656988	0.385567
TCGA-BH-A0EI-01	Other	BRCA	0.2933	-0.193044
TCGA-BH-A0GY-01	Other	BRCA	0.00651451	0.502276
TCGA-BH-A0GZ-01	Other	BRCA	0.224418	0.188296
TCGA-BH-A0H0-01	UCHL1-related	BRCA	-0.0411178	-0.241378
TCGA-BH-A0H3-01	Other	BRCA	0.0262015	-0.130358
TCGA-BH-A0H5-01	Other	BRCA	-0.199821	0.16099
TCGA-BH-A0H6-01	Other	BRCA	0.074653	0.153471
TCGA-BH-A0H7-01	Other	BRCA	0.182246	0.179447
TCGA-BH-A0H9-01	Other	BRCA	0.169362	-0.228228
TCGA-BH-A0HA-01	Other	BRCA	-0.0485877	0.162499
TCGA-BH-A0HB-01	Other	BRCA	-0.0449255	0.252653
TCGA-BH-A0HF-01	Other	BRCA	0.219885	0.416687
TCGA-BH-A0HI-01	Other	BRCA	0.0459158	0.0148375
TCGA-BH-A0HK-01	Other	BRCA	0.186989	0.303421
TCGA-BH-A0HL-01	UCHL1-related	BRCA	0.350824	-0.262196
TCGA-BH-A0HN-01	Other	BRCA	0.148169	-0.111186
TCGA-BH-A0HO-01	Other	BRCA	-0.0721571	-0.00401942
TCGA-BH-A0HP-01	Other	BRCA	0.0429102	0.0744713
TCGA-BH-A0HQ-01	Other	BRCA	0.120792	-0.036478
TCGA-BH-A0HU-01	Other	BRCA	-0.0545706	-0.26249
TCGA-BH-A0HW-01	UCHL1-related	BRCA	0.162376	-0.37885
TCGA-BH-A0HX-01	Other	BRCA	0.269964	0.046544
TCGA-BH-A0HY-01	Other	BRCA	0.144266	0.20348
TCGA-BH-A0RX-01	Other	BRCA	0.10903	0.27143
TCGA-BH-A0W3-01	UCHL1-related	BRCA	-0.00887995	-0.101257
TCGA-BH-A0W4-01	Other	BRCA	0.166164	-0.0126845
TCGA-BH-A0W5-01	Other	BRCA	-0.209012	-0.0970623
TCGA-BH-A0W7-01	Other	BRCA	-0.0182116	0.0353033
TCGA-BH-A0WA-01	Other	BRCA	0.339351	0.251177
TCGA-BH-A18F-01	Other	BRCA	0.212037	-0.0179519
TCGA-BH-A18G-01	Other	BRCA	0.061486	0.390476
TCGA-BH-A18H-01	Other	BRCA	-0.380283	0.0283984
TCGA-BH-A18I-01	Other	BRCA	-0.0234881	0.0909897
TCGA-BH-A18J-01	Other	BRCA	0.13334	0.24508
TCGA-BH-A18K-01	Other	BRCA	-0.0742455	-0.0716543
TCGA-BH-A18L-01	Other	BRCA	0.0161482	-0.133461
TCGA-BH-A18M-01	Other	BRCA	0.075899	-0.0844557
TCGA-BH-A18N-01	Other	BRCA	0.0297643	-0.239834
TCGA-BH-A18P-01	UCHL1-related	BRCA	0.085623	-0.0974463
TCGA-BH-A18Q-01	Other	BRCA	0.26042	0.202216
TCGA-BH-A18R-01	UCHL1-related	BRCA	-0.0220268	-0.147847
TCGA-BH-A18S-01	UCHL1-related	BRCA	-0.0321884	-0.119916
TCGA-BH-A18T-01	Other	BRCA	0.0652705	0.0533056
TCGA-BH-A18U-01	UCHL1-related	BRCA	-0.10669	0.127965
TCGA-BH-A18V-01	Other	BRCA	0.199005	0.325682
TCGA-BH-A1EN-01	Other	BRCA	-0.126479	0.251896
TCGA-BH-A1EO-01	Other	BRCA	-0.0612265	0.250219
TCGA-BH-A1ES-01	Other	BRCA	0.230672	-0.0570739
TCGA-BH-A1ET-01	Other	BRCA	-0.0832078	-0.161399
TCGA-BH-A1EU-01	Other	BRCA	0.0407994	-0.144224
TCGA-BH-A1EV-01	Other	BRCA	0.0904936	-0.0915882
TCGA-BH-A1EW-01	Other	BRCA	-0.040452	-0.076637
TCGA-BH-A1EX-01	Other	BRCA	-0.039913	0.337535
TCGA-BH-A1EY-01	Other	BRCA	-0.069929	0.189945
TCGA-BH-A1F0-01	Other	BRCA	-0.0894466	0.283051
TCGA-BH-A1F2-01	Other	BRCA	0.152704	0.117241
TCGA-BH-A1F5-01	Other	BRCA	0.0216297	-0.0477755
TCGA-BH-A1F6-01	Other	BRCA	0.00588878	0.454112
TCGA-BH-A1F8-01	Other	BRCA	-0.0208178	0.111956
TCGA-BH-A1FB-01	Other	BRCA	0.0321301	0.0783231
TCGA-BH-A1FC-01	Other	BRCA	0.192741	0.00547357
TCGA-BH-A1FD-01	Other	BRCA	-0.0558001	-0.0489429
TCGA-BH-A1FE-01	Other	BRCA	-0.0783373	-0.0305857
TCGA-BH-A1FG-01	Other	BRCA	-0.231529	0.211255
TCGA-BH-A1FH-01	Other	BRCA	0.317928	-0.0616277
TCGA-BH-A1FJ-01	Other	BRCA	-0.0226498	-0.0218753
TCGA-BH-A1FL-01	Other	BRCA	-0.202717	-0.315485
TCGA-BH-A1FM-01	Other	BRCA	0.114148	-0.106469
TCGA-BH-A1FN-01	Other	BRCA	0.187273	0.166422
TCGA-BH-A1FR-01	Other	BRCA	0.0750288	-0.212047
TCGA-BH-A1FU-01	Other	BRCA	0.0917098	0.231491
TCGA-BH-A201-01	Other	BRCA	0.0905268	0.26566
TCGA-BH-A202-01	Other	BRCA	0.03624	0.106259
TCGA-BH-A203-01	Other	BRCA	-0.210329	0.161878
TCGA-BH-A204-01	Other	BRCA	0.211731	-0.283498
TCGA-BH-A208-01	Other	BRCA	0.185009	0.348495
TCGA-BH-A209-01	Other	BRCA	-0.288762	-0.0341585
TCGA-BH-A28O-01	Other	BRCA	0.314249	0.00913121
TCGA-BH-A28Q-01	UCHL1-related	BRCA	-0.0388753	-0.222104
TCGA-BH-A2L8-01	Other	BRCA	-0.137995	-0.142887
TCGA-BH-A42T-01	UCHL1-related	BRCA	0.00776542	-0.0814693
TCGA-BH-A42U-01	Other	BRCA	0.187217	0.272553
TCGA-BH-A42V-01	Other	BRCA	0.0791293	-0.0799607
TCGA-BH-A5IZ-01	Other	BRCA	0.140512	0.459467
TCGA-BH-A5J0-01	Other	BRCA	-0.101783	0.0846798
TCGA-BH-A6R8-01	Other	BRCA	-0.110165	0.128879
TCGA-BH-A6R9-01	Other	BRCA	-0.180138	0.312765
TCGA-BH-A8FY-01	Other	BRCA	-0.134488	0.100187
TCGA-BH-A8FZ-01	Other	BRCA	-0.0628665	0.172766
TCGA-BH-A8G0-01	Other	BRCA	0.0972535	0.0308007
TCGA-BH-AB28-01	Other	BRCA	-0.00158109	-0.0837927
TCGA-C8-A12K-01	Other	BRCA	0.158489	0.185983
TCGA-C8-A12L-01	Other	BRCA	-0.0332832	0.589253
TCGA-C8-A12M-01	UCHL1-related	BRCA	0.180423	-0.340576
TCGA-C8-A12N-01	Other	BRCA	-0.13738	0.263842
TCGA-C8-A12O-01	Other	BRCA	-0.0117667	0.14662
TCGA-C8-A12P-01	Other	BRCA	0.00717801	0.278745
TCGA-C8-A12Q-01	Other	BRCA	-0.144098	0.274761
TCGA-C8-A12T-01	Other	BRCA	-0.175118	0.236458
TCGA-C8-A12U-01	Other	BRCA	-0.0741654	-0.116832
TCGA-C8-A12V-01	Other	BRCA	0.040414	0.151898
TCGA-C8-A12W-01	Other	BRCA	-0.0508513	-0.0983353
TCGA-C8-A12X-01	Other	BRCA	-0.00324677	-0.177147
TCGA-C8-A12Y-01	Other	BRCA	-0.0286847	0.345014
TCGA-C8-A12Z-01	Other	BRCA	-0.0106413	0.425007
TCGA-C8-A130-01	Other	BRCA	0.0399222	-0.123044
TCGA-C8-A131-01	Other	BRCA	-0.0901075	0.482152
TCGA-C8-A132-01	Other	BRCA	-0.0862211	0.262551
TCGA-C8-A133-01	Other	BRCA	-0.0566168	-0.0270411
TCGA-C8-A134-01	Other	BRCA	0.0454881	0.175507
TCGA-C8-A135-01	Other	BRCA	-0.0599811	0.211428
TCGA-C8-A137-01	Other	BRCA	-0.0948342	0.246911
TCGA-C8-A138-01	Other	BRCA	-0.16597	0.275776
TCGA-C8-A1HE-01	UCHL1-related	BRCA	-0.0430833	-0.10857
TCGA-C8-A1HF-01	Other	BRCA	-0.115485	0.0690034
TCGA-C8-A1HG-01	Other	BRCA	0.0926199	-0.0753787
TCGA-C8-A1HI-01	Other	BRCA	0.165578	0.0126502
TCGA-C8-A1HJ-01	UCHL1-related	BRCA	0.243684	0.248627
TCGA-C8-A1HK-01	Other	BRCA	-0.027595	-0.00754229
TCGA-C8-A1HL-01	Other	BRCA	-0.10024	0.0177975
TCGA-C8-A1HM-01	Other	BRCA	-0.168935	-0.0514954
TCGA-C8-A1HN-01	UCHL1-related	BRCA	-0.0920551	-0.218179
TCGA-C8-A1HO-01	Other	BRCA	0.142343	-0.228001
TCGA-C8-A26V-01	Other	BRCA	-0.076698	0.262734
TCGA-C8-A26W-01	Other	BRCA	-0.181639	0.0540747
TCGA-C8-A26X-01	Other	BRCA	-0.301146	0.3749
TCGA-C8-A26Y-01	Other	BRCA	-0.060528	0.459304
TCGA-C8-A26Z-01	Other	BRCA	-0.0437153	-0.33643
TCGA-C8-A273-01	Other	BRCA	-0.0695505	0.0267441
TCGA-C8-A274-01	UCHL1-related	BRCA	0.163112	0.0112972
TCGA-C8-A275-01	Other	BRCA	-0.250909	0.345311
TCGA-C8-A278-01	Other	BRCA	-0.196745	0.252941
TCGA-C8-A27A-01	UCHL1-related	BRCA	0.277039	-0.294326
TCGA-C8-A27B-01	Other	BRCA	-0.1446	0.325777
TCGA-C8-A3M7-01	Other	BRCA	0.0419228	0.095944
TCGA-C8-A3M8-01	Other	BRCA	-0.12757	-0.293568
TCGA-C8-A8HP-01	Other	BRCA	-0.201384	0.317932
TCGA-C8-A8HQ-01	Other	BRCA	-0.163205	0.082193
TCGA-C8-A8HR-01	Other	BRCA	0.0513169	0.191927
TCGA-D8-A13Y-01	UCHL1-related	BRCA	0.43601	-0.100429
TCGA-D8-A13Z-01	Other	BRCA	0.151576	0.334611
TCGA-D8-A140-01	Other	BRCA	0.0345054	-0.241529
TCGA-D8-A141-01	Other	BRCA	-0.21869	-0.055848
TCGA-D8-A142-01	Other	BRCA	0.136397	0.209103
TCGA-D8-A143-01	Other	BRCA	0.356588	0.146727
TCGA-D8-A145-01	UCHL1-related	BRCA	0.217823	-0.216234
TCGA-D8-A146-01	Other	BRCA	0.147869	-0.178069
TCGA-D8-A147-01	UCHL1-related	BRCA	0.299566	0.202125
TCGA-D8-A1J8-01	Other	BRCA	-0.129492	0.148282
TCGA-D8-A1J9-01	Other	BRCA	-0.0395835	0.284078
TCGA-D8-A1JA-01	Other	BRCA	-0.0419757	0.304695
TCGA-D8-A1JB-01	Other	BRCA	-0.0728039	-0.0924358
TCGA-D8-A1JC-01	Other	BRCA	0.180082	0.285863
TCGA-D8-A1JD-01	Other	BRCA	-0.0208052	-0.149559
TCGA-D8-A1JE-01	Other	BRCA	0.0197523	0.0796626
TCGA-D8-A1JF-01	Other	BRCA	-0.0110945	0.0895296
TCGA-D8-A1JG-01	Other	BRCA	0.0357977	0.338926
TCGA-D8-A1JH-01	Other	BRCA	0.021065	0.00425323
TCGA-D8-A1JI-01	UCHL1-related	BRCA	0.0877556	-0.188688
TCGA-D8-A1JJ-01	Other	BRCA	-0.109571	-0.000564005
TCGA-D8-A1JK-01	Other	BRCA	-0.219398	0.442062
TCGA-D8-A1JL-01	Other	BRCA	0.231364	0.221366
TCGA-D8-A1JM-01	Other	BRCA	0.196685	0.34329
TCGA-D8-A1JN-01	UCHL1-related	BRCA	-0.1135	0.029033
TCGA-D8-A1JP-01	Other	BRCA	0.182007	-0.189973
TCGA-D8-A1JS-01	Other	BRCA	-0.151432	0.193405
TCGA-D8-A1JT-01	Other	BRCA	-0.00660151	0.0797665
TCGA-D8-A1JU-01	Other	BRCA	0.0809512	0.0109175
TCGA-D8-A1X5-01	Other	BRCA	-0.0130421	0.175807
TCGA-D8-A1X6-01	Other	BRCA	-0.189041	0.0757638
TCGA-D8-A1X7-01	Other	BRCA	-0.0595019	-0.0366356
TCGA-D8-A1X8-01	Other	BRCA	0.0547113	-0.134882
TCGA-D8-A1X9-01	Other	BRCA	-0.144848	-0.0724263
TCGA-D8-A1XA-01	Other	BRCA	-0.0813628	0.0548759
TCGA-D8-A1XB-01	Other	BRCA	0.189892	-0.119393
TCGA-D8-A1XC-01	UCHL1-related	BRCA	0.15742	-0.0962782
TCGA-D8-A1XD-01	UCHL1-related	BRCA	0.242558	-0.273977
TCGA-D8-A1XF-01	Other	BRCA	0.16502	-0.246074
TCGA-D8-A1XG-01	Other	BRCA	0.185902	-0.108909
TCGA-D8-A1XJ-01	Other	BRCA	0.126622	0.118972
TCGA-D8-A1XK-01	Other	BRCA	0.132127	0.104603
TCGA-D8-A1XL-01	Other	BRCA	-0.145498	0.0753417
TCGA-D8-A1XM-01	Other	BRCA	0.090044	-0.135527
TCGA-D8-A1XO-01	Other	BRCA	0.15405	0.031296
TCGA-D8-A1XQ-01	Other	BRCA	-0.00412227	0.20239
TCGA-D8-A1XR-01	Other	BRCA	-0.0901209	-0.199176
TCGA-D8-A1XS-01	Other	BRCA	-0.194134	-0.237101
TCGA-D8-A1XT-01	Other	BRCA	-0.0849211	0.219454
TCGA-D8-A1XU-01	Other	BRCA	0.136077	0.181833
TCGA-D8-A1XV-01	UCHL1-related	BRCA	0.0306648	-0.125778
TCGA-D8-A1XW-01	Other	BRCA	-0.0346786	0.311137
TCGA-D8-A1XY-01	Other	BRCA	-0.0650649	0.112844
TCGA-D8-A1XZ-01	Other	BRCA	-0.136818	-0.230716
TCGA-D8-A1Y0-01	Other	BRCA	0.0706191	-0.2609
TCGA-D8-A1Y1-01	Other	BRCA	-0.0287533	-0.170144
TCGA-D8-A1Y2-01	Other	BRCA	-0.301087	0.0662932
TCGA-D8-A1Y3-01	Other	BRCA	-0.15278	0.048263
TCGA-D8-A27E-01	Other	BRCA	-0.0611348	-0.124087
TCGA-D8-A27F-01	Other	BRCA	0.213523	0.171931
TCGA-D8-A27G-01	Other	BRCA	0.0224412	-0.148668
TCGA-D8-A27H-01	Other	BRCA	0.24373	0.356622
TCGA-D8-A27I-01	Other	BRCA	0.224777	-0.0303194
TCGA-D8-A27K-01	Other	BRCA	0.0315152	-0.141562
TCGA-D8-A27L-01	Other	BRCA	0.0527185	0.0749954
TCGA-D8-A27M-01	Other	BRCA	0.11801	0.349726
TCGA-D8-A27N-01	Other	BRCA	-0.293879	-0.0857154
TCGA-D8-A27P-01	Other	BRCA	0.242598	-0.00339214
TCGA-D8-A27R-01	Other	BRCA	0.0960293	-0.216223
TCGA-D8-A27T-01	Other	BRCA	-0.100182	-0.0678999
TCGA-D8-A27V-01	Other	BRCA	-0.056017	0.190886
TCGA-D8-A27W-01	Other	BRCA	0.238086	-0.24493
TCGA-D8-A3Z5-01	Other	BRCA	0.173304	-0.114849
TCGA-D8-A3Z6-01	Other	BRCA	0.108445	0.0434729
TCGA-D8-A4Z1-01	UCHL1-related	BRCA	0.190578	-0.0876844
TCGA-D8-A73U-01	Other	BRCA	-0.218758	0.203546
TCGA-D8-A73W-01	Other	BRCA	-0.190883	0.192627
TCGA-D8-A73X-01	UCHL1-related	BRCA	-0.00719291	-0.0996369
TCGA-E2-A105-01	UCHL1-related	BRCA	0.122219	-0.356577
TCGA-E2-A106-01	Other	BRCA	0.136576	0.00988759
TCGA-E2-A107-01	Other	BRCA	0.0233559	-0.0514654
TCGA-E2-A108-01	Other	BRCA	-0.0763252	0.27176
TCGA-E2-A109-01	Other	BRCA	0.134816	-0.197432
TCGA-E2-A10A-01	Other	BRCA	0.03444	-0.169695
TCGA-E2-A10B-01	UCHL1-related	BRCA	0.185851	-0.116149
TCGA-E2-A10C-01	Other	BRCA	-0.0478459	-0.095645
TCGA-E2-A10E-01	Other	BRCA	0.0756797	-0.133471
TCGA-E2-A10F-01	Other	BRCA	-0.0507272	-0.0353208
TCGA-E2-A14N-01	Other	BRCA	0.0993423	0.149144
TCGA-E2-A14O-01	Other	BRCA	-0.167691	0.153798
TCGA-E2-A14P-01	Other	BRCA	-0.0145679	0.0808938
TCGA-E2-A14Q-01	Other	BRCA	0.0339098	0.121687
TCGA-E2-A14R-01	Other	BRCA	-0.0847601	0.335344
TCGA-E2-A14S-01	UCHL1-related	BRCA	-0.0124001	-0.193533
TCGA-E2-A14T-01	Other	BRCA	0.0466579	-0.106575
TCGA-E2-A14U-01	UCHL1-related	BRCA	0.22384	-0.0532436
TCGA-E2-A14V-01	Other	BRCA	-0.129466	0.208344
TCGA-E2-A14W-01	UCHL1-related	BRCA	0.216419	-0.0664859
TCGA-E2-A14X-01	Other	BRCA	-0.109681	0.397295
TCGA-E2-A14Y-01	Other	BRCA	-0.113633	0.675826
TCGA-E2-A14Z-01	Other	BRCA	-0.269177	-0.0434321
TCGA-E2-A150-01	Other	BRCA	-0.0560738	0.380789
TCGA-E2-A152-01	Other	BRCA	0.0788997	0.22937
TCGA-E2-A153-01	Other	BRCA	-0.0398274	0.296078
TCGA-E2-A154-01	UCHL1-related	BRCA	-0.00625434	-0.175572
TCGA-E2-A155-01	Other	BRCA	0.0961765	-0.26717
TCGA-E2-A156-01	UCHL1-related	BRCA	0.129187	-0.133729
TCGA-E2-A158-01	UCHL1-related	BRCA	0.348165	-0.072778
TCGA-E2-A159-01	Other	BRCA	-0.125561	0.64442
TCGA-E2-A15A-01	Other	BRCA	-0.199074	-0.0739038
TCGA-E2-A15C-01	Other	BRCA	-0.121764	-0.0707535
TCGA-E2-A15D-01	Other	BRCA	0.0754136	-0.189901
TCGA-E2-A15E-01	Other	BRCA	0.232101	0.129248
TCGA-E2-A15F-01	Other	BRCA	0.237374	-0.0273932
TCGA-E2-A15G-01	Other	BRCA	-0.0657444	-0.237684
TCGA-E2-A15H-01	Other	BRCA	-0.126869	-0.0269017
TCGA-E2-A15I-01	Other	BRCA	0.039914	-0.141018
TCGA-E2-A15J-01	UCHL1-related	BRCA	-0.16266	0.0465188
TCGA-E2-A15K-01	Other	BRCA	-0.256466	0.0240413
TCGA-E2-A15L-01	UCHL1-related	BRCA	-0.0366431	0.0137589
TCGA-E2-A15M-01	Other	BRCA	-0.116593	-0.11837
TCGA-E2-A15O-01	UCHL1-related	BRCA	-0.0900192	-0.268094
TCGA-E2-A15P-01	Other	BRCA	0.0811081	-0.186514
TCGA-E2-A15R-01	UCHL1-related	BRCA	0.265604	-0.198387
TCGA-E2-A15S-01	UCHL1-related	BRCA	0.255282	-0.305002
TCGA-E2-A15T-01	Other	BRCA	0.168768	-0.342092
TCGA-E2-A1AZ-01	Other	BRCA	0.22132	0.0985036
TCGA-E2-A1B0-01	Other	BRCA	-0.0739987	0.224093
TCGA-E2-A1B1-01	Other	BRCA	-0.00198217	0.20296
TCGA-E2-A1B4-01	Other	BRCA	-0.0710596	0.00580212
TCGA-E2-A1B5-01	Other	BRCA	-0.173905	-0.0719169
TCGA-E2-A1B6-01	Other	BRCA	-0.0997419	0.0789559
TCGA-E2-A1BC-01	Other	BRCA	0.100904	-0.00867775
TCGA-E2-A1BD-01	Other	BRCA	-0.0459121	-0.0275417
TCGA-E2-A1IE-01	UCHL1-related	BRCA	0.107368	-0.309186
TCGA-E2-A1IF-01	Other	BRCA	0.0499933	0.220382
TCGA-E2-A1IG-01	Other	BRCA	0.0670124	-0.0758026
TCGA-E2-A1IH-01	Other	BRCA	-0.18778	-0.00524648
TCGA-E2-A1II-01	Other	BRCA	0.00953232	-0.000512683
TCGA-E2-A1IJ-01	Other	BRCA	0.148307	0.184014
TCGA-E2-A1IK-01	Other	BRCA	0.0864396	0.0292861
TCGA-E2-A1IL-01	Other	BRCA	0.216611	-0.111926
TCGA-E2-A1IN-01	Other	BRCA	-0.000139554	-0.147915
TCGA-E2-A1IO-01	Other	BRCA	0.242239	-0.180244
TCGA-E2-A1IU-01	Other	BRCA	-0.0463485	0.0274106
TCGA-E2-A1L6-01	Other	BRCA	0.130051	-0.142492
TCGA-E2-A1L7-01	Other	BRCA	0.166577	0.0902209
TCGA-E2-A1L8-01	Other	BRCA	-0.069949	-0.0745203
TCGA-E2-A1L9-01	Other	BRCA	-0.124279	0.212549
TCGA-E2-A1LA-01	Other	BRCA	-0.0921863	-0.0252437
TCGA-E2-A1LB-01	Other	BRCA	-0.0636812	0.066722
TCGA-E2-A1LE-01	Other	BRCA	-0.227266	0.227442
TCGA-E2-A1LG-01	Other	BRCA	0.206473	0.499093
TCGA-E2-A1LH-01	Other	BRCA	-0.137998	0.429938
TCGA-E2-A1LI-01	Other	BRCA	0.0489184	0.360909
TCGA-E2-A1LK-01	Other	BRCA	0.101936	0.54522
TCGA-E2-A1LL-01	Other	BRCA	-0.238128	0.575486
TCGA-E2-A1LS-01	Other	BRCA	0.22826	0.262233
TCGA-E2-A2P5-01	UCHL1-related	BRCA	-0.115438	-0.138875
TCGA-E2-A2P6-01	Other	BRCA	-0.0545115	-0.0436294
TCGA-E2-A3DX-01	Other	BRCA	0.0489067	-0.00448789
TCGA-E2-A56Z-01	UCHL1-related	BRCA	0.178545	-0.216462
TCGA-E2-A570-01	Other	BRCA	0.141407	0.132871
TCGA-E2-A572-01	Other	BRCA	0.18611	0.213702
TCGA-E2-A573-01	Other	BRCA	-0.0314248	0.402296
TCGA-E2-A574-01	Other	BRCA	0.254554	0.252474
TCGA-E2-A576-01	Other	BRCA	0.0337792	-0.0833927
TCGA-E2-A9RU-01	Other	BRCA	-0.150433	0.208609
TCGA-E9-A1N3-01	Other	BRCA	0.0730522	-0.135364
TCGA-E9-A1N4-01	Other	BRCA	-0.261556	-0.0748371
TCGA-E9-A1N5-01	Other	BRCA	0.0248712	-0.237783
TCGA-E9-A1N6-01	Other	BRCA	-0.0377642	0.110856
TCGA-E9-A1N8-01	UCHL1-related	BRCA	0.340734	-0.104051
TCGA-E9-A1N9-01	Other	BRCA	0.258837	-0.355033
TCGA-E9-A1NA-01	Other	BRCA	0.136409	0.0589304
TCGA-E9-A1NC-01	Other	BRCA	0.11481	0.443431
TCGA-E9-A1ND-01	Other	BRCA	-0.177568	0.690529
TCGA-E9-A1NE-01	Other	BRCA	-0.0974999	0.0793124
TCGA-E9-A1NF-01	Other	BRCA	-0.141043	0.00185685
TCGA-E9-A1NG-01	Other	BRCA	-0.124789	0.428255
TCGA-E9-A1NH-01	Other	BRCA	0.102338	0.0271447
TCGA-E9-A1NI-01	Other	BRCA	-0.146804	0.0512855
TCGA-E9-A1QZ-01	Other	BRCA	0.0568155	-0.0402677
TCGA-E9-A1R0-01	Other	BRCA	0.0228596	-0.105546
TCGA-E9-A1R2-01	UCHL1-related	BRCA	0.172171	-0.0390251
TCGA-E9-A1R3-01	Other	BRCA	-0.156213	0.398597
TCGA-E9-A1R4-01	Other	BRCA	-0.0317468	-0.0125305
TCGA-E9-A1R5-01	Other	BRCA	-0.000923658	0.119011
TCGA-E9-A1R6-01	UCHL1-related	BRCA	0.0998037	-0.142503
TCGA-E9-A1R7-01	UCHL1-related	BRCA	0.124423	-0.0524904
TCGA-E9-A1RA-01	Other	BRCA	-0.12969	-0.131106
TCGA-E9-A1RB-01	Other	BRCA	0.0690178	-0.0801746
TCGA-E9-A1RC-01	UCHL1-related	BRCA	0.192803	-0.0229704
TCGA-E9-A1RD-01	Other	BRCA	-0.175008	-0.227891
TCGA-E9-A1RE-01	UCHL1-related	BRCA	0.0562069	-0.268481
TCGA-E9-A1RF-01	Other	BRCA	-0.223292	-0.00964888
TCGA-E9-A1RG-01	Other	BRCA	0.0396743	0.126405
TCGA-E9-A1RH-01	Other	BRCA	-0.00535528	0.409814
TCGA-E9-A1RI-01	Other	BRCA	0.109993	-0.14419
TCGA-E9-A226-01	Other	BRCA	0.227493	0.0867973
TCGA-E9-A227-01	Other	BRCA	-0.133705	-0.382349
TCGA-E9-A228-01	UCHL1-related	BRCA	0.117493	-0.458002
TCGA-E9-A229-01	Other	BRCA	-0.00924412	-0.00976873
TCGA-E9-A22A-01	Other	BRCA	-0.118006	0.162634
TCGA-E9-A22B-01	Other	BRCA	0.068534	0.0421419
TCGA-E9-A22D-01	Other	BRCA	-0.21473	-0.0440439
TCGA-E9-A22E-01	Other	BRCA	0.00333812	0.0956497
TCGA-E9-A22G-01	UCHL1-related	BRCA	0.286191	0.0222338
TCGA-E9-A22H-01	Other	BRCA	-0.0648709	-0.00791155
TCGA-E9-A243-01	Other	BRCA	-0.0728295	0.343142
TCGA-E9-A244-01	Other	BRCA	0.26023	0.24355
TCGA-E9-A245-01	UCHL1-related	BRCA	-0.048847	-0.351103
TCGA-E9-A247-01	Other	BRCA	0.103486	-0.197377
TCGA-E9-A248-01	Other	BRCA	0.000168713	0.167168
TCGA-E9-A249-01	Other	BRCA	-0.2338	-0.140159
TCGA-E9-A24A-01	Other	BRCA	-0.197122	0.0656198
TCGA-E9-A295-01	Other	BRCA	0.14813	0.349288
TCGA-E9-A2JS-01	UCHL1-related	BRCA	0.101795	-0.160173
TCGA-E9-A2JT-01	Other	BRCA	-0.21566	-0.159522
TCGA-E9-A3HO-01	UCHL1-related	BRCA	0.0129177	-0.210511
TCGA-E9-A3Q9-01	Other	BRCA	-0.00611777	-0.0503433
TCGA-E9-A3QA-01	Other	BRCA	-0.0157053	0.388277
TCGA-E9-A3X8-01	Other	BRCA	0.062835	0.19295
TCGA-E9-A54X-01	UCHL1-related	BRCA	0.17455	-0.00675982
TCGA-E9-A54Y-01	Other	BRCA	-0.0212936	0.116663
TCGA-E9-A5FK-01	Other	BRCA	-0.0904909	0.140435
TCGA-E9-A5FL-01	Other	BRCA	0.240366	0.521017
TCGA-E9-A5UO-01	Other	BRCA	0.0513053	-0.228928
TCGA-E9-A5UP-01	Other	BRCA	0.0760153	0.19938
TCGA-E9-A6HE-01	Other	BRCA	-0.0314162	0.147981
TCGA-EW-A1IW-01	UCHL1-related	BRCA	0.106811	-0.0210409
TCGA-EW-A1IX-01	Other	BRCA	0.195993	-0.186205
TCGA-EW-A1IY-01	Other	BRCA	0.0199275	0.07941
TCGA-EW-A1IZ-01	Other	BRCA	-0.26962	0.0603924
TCGA-EW-A1J1-01	Other	BRCA	-0.0494968	-0.190132
TCGA-EW-A1J2-01	Other	BRCA	0.0749851	-0.124156
TCGA-EW-A1J3-01	Other	BRCA	-0.14018	0.000286512
TCGA-EW-A1J5-01	Other	BRCA	-0.189367	-0.00682591
TCGA-EW-A1J6-01	Other	BRCA	-0.074188	-0.0386928
TCGA-EW-A1OV-01	Other	BRCA	-0.17246	-0.0918098
TCGA-EW-A1OW-01	Other	BRCA	0.286464	0.24392
TCGA-EW-A1OX-01	Other	BRCA	0.24317	-0.302937
TCGA-EW-A1OY-01	Other	BRCA	0.150521	-0.155943
TCGA-EW-A1OZ-01	Other	BRCA	-0.164567	-0.149721
TCGA-EW-A1P0-01	UCHL1-related	BRCA	-0.010188	-0.329434
TCGA-EW-A1P1-01	Other	BRCA	0.0478108	0.407725
TCGA-EW-A1P3-01	Other	BRCA	0.0792904	0.0904787
TCGA-EW-A1P4-01	Other	BRCA	0.0568138	0.450563
TCGA-EW-A1P5-01	Other	BRCA	-0.0673437	0.278985
TCGA-EW-A1P6-01	UCHL1-related	BRCA	-0.0984218	-0.0861326
TCGA-EW-A1P7-01	Other	BRCA	0.123535	0.323233
TCGA-EW-A1P8-01	Other	BRCA	0.148152	0.0765497
TCGA-EW-A1PA-01	Other	BRCA	-0.0454971	-0.0769722
TCGA-EW-A1PB-01	Other	BRCA	-0.18069	0.499923
TCGA-EW-A1PC-01	UCHL1-related	BRCA	0.21316	0.0260596
TCGA-EW-A1PD-01	Other	BRCA	0.0110368	-0.330418
TCGA-EW-A1PE-01	Other	BRCA	-0.249556	0.300144
TCGA-EW-A1PF-01	Other	BRCA	0.0268405	-0.105151
TCGA-EW-A1PG-01	Other	BRCA	0.13028	0.352032
TCGA-EW-A1PH-01	Other	BRCA	0.299225	0.34392
TCGA-EW-A2FR-01	Other	BRCA	-0.0384139	0.269267
TCGA-EW-A2FS-01	Other	BRCA	-0.103696	-0.1514
TCGA-EW-A2FV-01	Other	BRCA	-0.0313617	0.0646337
TCGA-EW-A2FW-01	Other	BRCA	-0.0718826	-0.312467
TCGA-EW-A3E8-01	Other	BRCA	-0.0444683	-0.0466371
TCGA-EW-A3U0-01	Other	BRCA	0.234135	-0.0320382
TCGA-EW-A423-01	Other	BRCA	-0.113203	-0.0333462
TCGA-EW-A424-01	UCHL1-related	BRCA	0.107009	-0.140592
TCGA-EW-A6S9-01	Other	BRCA	-0.00663866	0.0344993
TCGA-EW-A6SA-01	UCHL1-related	BRCA	0.0624484	-0.326572
TCGA-EW-A6SB-01	Other	BRCA	-0.0522163	0.265137
TCGA-EW-A6SC-01	Other	BRCA	0.0752094	-0.19232
TCGA-EW-A6SD-01	Other	BRCA	-0.179511	0.393695
TCGA-GI-A2C8-01	Other	BRCA	-0.0493855	0.00814863
TCGA-GI-A2C9-01	Other	BRCA	0.35952	0.191646
TCGA-GM-A2D9-01	Other	BRCA	0.0374818	0.00593713
TCGA-GM-A2DA-01	Other	BRCA	-0.0731749	-0.00626048
TCGA-GM-A2DB-01	Other	BRCA	-0.00335406	0.166144
TCGA-GM-A2DC-01	Other	BRCA	0.0892682	-0.116911
TCGA-GM-A2DD-01	Other	BRCA	-0.207647	0.37763
TCGA-GM-A2DF-01	Other	BRCA	-0.0667666	0.457464
TCGA-GM-A2DH-01	Other	BRCA	0.182157	-0.10672
TCGA-GM-A2DI-01	Other	BRCA	-0.14131	0.202786
TCGA-GM-A2DK-01	Other	BRCA	0.173324	0.0102935
TCGA-GM-A2DL-01	Other	BRCA	-0.153465	-0.00321495
TCGA-GM-A2DM-01	Other	BRCA	-0.11529	-0.127933
TCGA-GM-A2DN-01	Other	BRCA	-0.0236263	0.269335
TCGA-GM-A2DO-01	Other	BRCA	-0.21119	0.102113
TCGA-GM-A3NW-01	UCHL1-related	BRCA	0.0963926	-0.0930098
TCGA-GM-A3NY-01	UCHL1-related	BRCA	0.0257278	0.00458775
TCGA-GM-A3XG-01	Other	BRCA	0.238213	0.0218286
TCGA-GM-A3XL-01	Other	BRCA	-0.0355333	0.197639
TCGA-GM-A3XN-01	Other	BRCA	0.0162435	-0.0528382
TCGA-GM-A4E0-01	Other	BRCA	0.0806142	0.240266
TCGA-GM-A5PV-01	Other	BRCA	0.0474429	0.123307
TCGA-GM-A5PX-01	UCHL1-related	BRCA	0.102542	-0.0601277
TCGA-HN-A2NL-01	UCHL1-related	BRCA	0.354551	-0.257348
TCGA-HN-A2OB-01	Other	BRCA	0.289186	-0.132184
TCGA-JL-A3YW-01	Other	BRCA	-0.213339	0.529532
TCGA-JL-A3YX-01	UCHL1-related	BRCA	-0.0857156	-0.119936
TCGA-LD-A66U-01	Other	BRCA	0.0193082	0.0442597
TCGA-LD-A74U-01	Other	BRCA	-0.0308206	-0.127572
TCGA-LD-A7W5-01	Other	BRCA	-0.208337	-0.273175
TCGA-LD-A7W6-01	UCHL1-related	BRCA	0.102223	-0.20297
TCGA-LD-A9QF-01	Other	BRCA	-0.245161	0.444965
TCGA-LL-A440-01	Other	BRCA	0.053804	0.0532719
TCGA-LL-A441-01	Other	BRCA	0.176029	-0.0657465
TCGA-LL-A442-01	Other	BRCA	-0.0988721	-0.0993811
TCGA-LL-A50Y-01	Other	BRCA	-0.0822014	0.0437785
TCGA-LL-A5YL-01	Other	BRCA	0.050261	0.225485
TCGA-LL-A5YM-01	Other	BRCA	0.101738	0.0913532
TCGA-LL-A5YN-01	Other	BRCA	-0.0397091	0.174624
TCGA-LL-A5YO-01	Other	BRCA	-0.223174	0.201658
TCGA-LL-A5YP-01	Other	BRCA	0.194523	0.0730024
TCGA-LL-A6FP-01	Other	BRCA	0.0619836	0.0501608
TCGA-LL-A6FQ-01	Other	BRCA	-0.0691775	0.149496
TCGA-LL-A6FR-01	Other	BRCA	0.249975	0.408465
TCGA-LL-A73Y-01	Other	BRCA	0.112054	0.0475849
TCGA-LL-A73Z-01	Other	BRCA	0.0949674	0.358063
TCGA-LL-A740-01	Other	BRCA	-0.179771	0.218802
TCGA-LL-A7SZ-01	Other	BRCA	-0.157742	0.0724598
TCGA-LL-A7T0-01	Other	BRCA	-0.108365	-0.199642
TCGA-LL-A8F5-01	Other	BRCA	0.113246	0.272651
TCGA-LL-A9Q3-01	Other	BRCA	-0.0544181	0.147175
TCGA-LQ-A4E4-01	UCHL1-related	BRCA	0.0958729	-0.188395
TCGA-MS-A51U-01	Other	BRCA	0.1872	0.0523788
TCGA-OK-A5Q2-01	Other	BRCA	0.167762	0.219013
TCGA-OL-A5D6-01	Other	BRCA	0.00198849	0.302759
TCGA-OL-A5D7-01	Other	BRCA	0.0441382	-0.0499131
TCGA-OL-A5D8-01	Other	BRCA	0.00219966	0.0717283
TCGA-OL-A5DA-01	UCHL1-related	BRCA	0.110278	-0.178007
TCGA-OL-A5RU-01	Other	BRCA	-0.148194	-0.0175751
TCGA-OL-A5RV-01	UCHL1-related	BRCA	0.211325	0.110958
TCGA-OL-A5RW-01	Other	BRCA	0.247586	0.440735
TCGA-OL-A5RX-01	Other	BRCA	0.202828	-0.0530963
TCGA-OL-A5RY-01	Other	BRCA	-0.109483	0.502754
TCGA-OL-A5RZ-01	Other	BRCA	0.0141127	-0.15204
TCGA-OL-A5S0-01	Other	BRCA	0.221716	0.311523
TCGA-OL-A66H-01	Other	BRCA	-0.201253	0.00611899
TCGA-OL-A66I-01	Other	BRCA	0.110115	0.240316
TCGA-OL-A66J-01	Other	BRCA	-0.0456904	-0.0916185
TCGA-OL-A66K-01	UCHL1-related	BRCA	0.195084	-0.200594
TCGA-OL-A66L-01	Other	BRCA	-0.0438937	0.229337
TCGA-OL-A66N-01	Other	BRCA	0.114555	0.123091
TCGA-OL-A66O-01	Other	BRCA	0.0682306	-0.0634539
TCGA-OL-A66P-01	Other	BRCA	-0.15106	0.368699
TCGA-OL-A6VO-01	Other	BRCA	0.209473	0.0950941
TCGA-OL-A6VQ-01	Other	BRCA	0.196229	0.214219
TCGA-OL-A6VR-01	Other	BRCA	0.104628	0.0610815
TCGA-OL-A97C-01	Other	BRCA	0.37819	-0.114948
TCGA-PE-A5DC-01	Other	BRCA	-0.0671489	-0.220537
TCGA-PE-A5DD-01	Other	BRCA	-0.0486013	-0.165774
TCGA-PE-A5DE-01	Other	BRCA	-0.277829	0.194083
TCGA-PL-A8LV-01	Other	BRCA	0.059693	0.377398
TCGA-PL-A8LX-01	Other	BRCA	0.0570196	-0.243595
TCGA-PL-A8LY-01	Other	BRCA	0.262227	0.153674
TCGA-PL-A8LZ-01	Other	BRCA	-0.168387	0.141217
TCGA-S3-A6ZF-01	Other	BRCA	-0.017232	-0.0710249
TCGA-S3-A6ZG-01	UCHL1-related	BRCA	-0.0577823	-0.197203
TCGA-S3-A6ZH-01	Other	BRCA	-0.172812	-0.142986
TCGA-S3-AA0Z-01	Other	BRCA	0.0145468	0.294874
TCGA-S3-AA10-01	Other	BRCA	-0.036315	0.347258
TCGA-S3-AA11-01	UCHL1-related	BRCA	0.076607	-0.170207
TCGA-S3-AA12-01	UCHL1-related	BRCA	0.147162	-0.1769
TCGA-S3-AA14-01	Other	BRCA	0.0122302	-0.19596
TCGA-S3-AA15-01	Other	BRCA	-0.0721716	0.106525
TCGA-S3-AA17-01	Other	BRCA	-0.188358	0.160057
TCGA-UL-AAZ6-01	Other	BRCA	-0.0126847	0.194755
TCGA-UU-A93S-01	Other	BRCA	-0.139954	0.378909
TCGA-V7-A7HQ-01	Other	BRCA	0.103677	0.151053
TCGA-W8-A86G-01	UCHL1-related	BRCA	0.195425	0.0469869
TCGA-WT-AB41-01	Other	BRCA	-0.070766	0.177463
TCGA-WT-AB44-01	Other	BRCA	-0.0554489	0.210569
TCGA-XX-A899-01	Other	BRCA	-0.0648369	-0.0188979
TCGA-XX-A89A-01	Other	BRCA	0.0501705	-0.0597295
TCGA-Z7-A8R5-01	Other	BRCA	-0.02822	0.191451
TCGA-Z7-A8R6-01	Other	BRCA	-0.101916	-0.0439803
TCGA-OR-A5J1-01	Other	ACC	0.00807772	0.0788119
TCGA-OR-A5J2-01	Other	ACC	0.0732904	-0.0442114
TCGA-OR-A5J3-01	Other	ACC	0.115412	0.306354
TCGA-OR-A5J5-01	UCHL1-related	ACC	0.320804	-0.138033
TCGA-OR-A5J6-01	Other	ACC	-0.088636	0.123209
TCGA-OR-A5J7-01	UCHL1-related	ACC	-0.0523076	0.0742813
TCGA-OR-A5J8-01	Other	ACC	-0.198616	0.329159
TCGA-OR-A5J9-01	Other	ACC	0.250788	-0.137487
TCGA-OR-A5JA-01	Other	ACC	-0.16766	0.0497241
TCGA-OR-A5JB-01	Other	ACC	-0.325579	0.508769
TCGA-OR-A5JC-01	Other	ACC	-0.0671272	-0.167574
TCGA-OR-A5JD-01	Other	ACC	0.051731	0.0715816
TCGA-OR-A5JE-01	Other	ACC	-0.0223082	0.210012
TCGA-OR-A5JF-01	Other	ACC	0.174285	-0.171216
TCGA-OR-A5JG-01	Other	ACC	-0.165885	0.140024
TCGA-OR-A5JI-01	Other	ACC	0.0332101	0.310489
TCGA-OR-A5JJ-01	UCHL1-related	ACC	0.316248	-0.0707416
TCGA-OR-A5JK-01	Other	ACC	-0.132188	-0.0378542
TCGA-OR-A5JL-01	Other	ACC	0.0702746	0.2628
TCGA-OR-A5JM-01	Other	ACC	0.0875594	-0.0529713
TCGA-OR-A5JO-01	Other	ACC	-0.271934	0.329584
TCGA-OR-A5JP-01	Other	ACC	0.15256	0.155776
TCGA-OR-A5JQ-01	Other	ACC	0.0422992	0.259265
TCGA-OR-A5JR-01	Other	ACC	0.0406303	0.125926
TCGA-OR-A5JS-01	Other	ACC	-0.0371569	-0.16252
TCGA-OR-A5JT-01	Other	ACC	0.116764	0.192977
TCGA-OR-A5JV-01	Other	ACC	-0.112705	0.094195
TCGA-OR-A5JW-01	Other	ACC	-0.111469	-0.104732
TCGA-OR-A5JX-01	Other	ACC	0.0202938	-0.201684
TCGA-OR-A5JY-01	Other	ACC	0.0519189	0.251232
TCGA-OR-A5JZ-01	Other	ACC	0.0434864	0.130174
TCGA-OR-A5K0-01	Other	ACC	-0.00562084	0.251754
TCGA-OR-A5K1-01	Other	ACC	-0.0356167	0.226043
TCGA-OR-A5K2-01	Other	ACC	-0.12848	0.0117609
TCGA-OR-A5K3-01	UCHL1-related	ACC	0.156699	-0.126483
TCGA-OR-A5K4-01	UCHL1-related	ACC	0.237467	-0.242978
TCGA-OR-A5K5-01	Other	ACC	0.0610109	0.153971
TCGA-OR-A5K6-01	Other	ACC	-0.0637239	0.0892324
TCGA-OR-A5K8-01	Other	ACC	0.173407	-0.00746842
TCGA-OR-A5K9-01	Other	ACC	0.0424738	0.0683152
TCGA-OR-A5KO-01	Other	ACC	0.0721472	-0.0432886
TCGA-OR-A5KT-01	Other	ACC	-0.111444	0.369394
TCGA-OR-A5KU-01	Other	ACC	0.2941	-0.110545
TCGA-OR-A5KV-01	UCHL1-related	ACC	0.371448	-0.235749
TCGA-OR-A5KW-01	Other	ACC	-0.0197373	-0.193418
TCGA-OR-A5KX-01	UCHL1-related	ACC	0.00872365	0.063612
TCGA-OR-A5KY-01	UCHL1-related	ACC	-0.103132	-0.158122
TCGA-OR-A5KZ-01	Other	ACC	-0.136563	-0.159462
TCGA-OR-A5L3-01	Other	ACC	0.0573123	-0.0129214
TCGA-OR-A5L4-01	Other	ACC	-0.103256	0.101781
TCGA-OR-A5L5-01	Other	ACC	0.115739	0.107539
TCGA-OR-A5L6-01	Other	ACC	-0.113833	0.157119
TCGA-OR-A5L8-01	Other	ACC	0.237905	-0.280882
TCGA-OR-A5L9-01	Other	ACC	0.238021	0.0271919
TCGA-OR-A5LA-01	Other	ACC	0.126809	0.192441
TCGA-OR-A5LB-01	Other	ACC	0.215041	-0.308141
TCGA-OR-A5LC-01	Other	ACC	0.00896984	0.0179516
TCGA-OR-A5LD-01	Other	ACC	0.0891025	0.00161183
TCGA-OR-A5LE-01	Other	ACC	0.0404324	-0.0460918
TCGA-OR-A5LG-01	Other	ACC	-0.21677	0.358521
TCGA-OR-A5LH-01	Other	ACC	0.262338	0.403302
TCGA-OR-A5LJ-01	UCHL1-related	ACC	0.173848	-0.0462077
TCGA-OR-A5LK-01	Other	ACC	0.0899322	0.342216
TCGA-OR-A5LL-01	Other	ACC	-0.084007	0.160894
TCGA-OR-A5LM-01	Other	ACC	0.16853	0.171335
TCGA-OR-A5LN-01	Other	ACC	-0.169184	0.183793
TCGA-OR-A5LO-01	UCHL1-related	ACC	0.3269	-0.322075
TCGA-OR-A5LP-01	Other	ACC	0.0145409	0.198093
TCGA-OR-A5LR-01	Other	ACC	0.154643	-0.0232758
TCGA-OR-A5LS-01	Other	ACC	0.295826	0.0227778
TCGA-OR-A5LT-01	Other	ACC	0.0726322	0.107384
TCGA-OU-A5PI-01	Other	ACC	0.324381	0.00769839
TCGA-P6-A5OF-01	Other	ACC	0.210792	0.150014
TCGA-P6-A5OG-01	Other	ACC	-0.271155	0.406258
TCGA-PA-A5YG-01	Other	ACC	-0.0506959	0.158165
TCGA-PK-A5H8-01	Other	ACC	-0.141331	-0.0703952
TCGA-PK-A5H9-01	Other	ACC	-0.0961633	0.220784
TCGA-PK-A5HA-01	Other	ACC	-0.177395	0.241558
TCGA-PK-A5HB-01	Other	ACC	-0.166215	-0.0375329
TCGA-2F-A9KO-01	Other	BLCA	0.113455	-0.0926463
TCGA-2F-A9KP-01	UCHL1-related	BLCA	0.001211	-0.228422
TCGA-2F-A9KQ-01	UCHL1-related	BLCA	-0.0585797	-0.166539
TCGA-2F-A9KR-01	UCHL1-related	BLCA	0.248003	-0.0728487
TCGA-2F-A9KT-01	Other	BLCA	-0.113869	0.152045
TCGA-2F-A9KW-01	Other	BLCA	0.0699555	-0.205944
TCGA-4Z-AA7M-01	UCHL1-related	BLCA	0.21384	-0.255005
TCGA-4Z-AA7N-01	Other	BLCA	0.183747	-0.168724
TCGA-4Z-AA7O-01	Other	BLCA	-0.18128	0.16896
TCGA-4Z-AA7Q-01	Other	BLCA	-0.0946141	0.385082
TCGA-4Z-AA7R-01	UCHL1-related	BLCA	0.328236	-0.505646
TCGA-4Z-AA7S-01	Other	BLCA	-0.187883	-0.141951
TCGA-4Z-AA7W-01	Other	BLCA	-0.165547	0.409946
TCGA-4Z-AA7Y-01	Other	BLCA	0.0361195	0.423168
TCGA-4Z-AA80-01	UCHL1-related	BLCA	0.251202	-0.120638
TCGA-4Z-AA81-01	Other	BLCA	-0.344894	0.46987
TCGA-4Z-AA82-01	Other	BLCA	0.00118088	0.319772
TCGA-4Z-AA83-01	Other	BLCA	-0.214742	0.33594
TCGA-4Z-AA84-01	UCHL1-related	BLCA	0.0304567	-0.0972704
TCGA-4Z-AA86-01	Other	BLCA	-0.384683	0.381238
TCGA-4Z-AA87-01	UCHL1-related	BLCA	0.0516671	-0.326025
TCGA-4Z-AA89-01	Other	BLCA	-0.187497	0.114011
TCGA-5N-A9KI-01	Other	BLCA	0.134863	-0.0658504
TCGA-5N-A9KM-01	Other	BLCA	-0.106736	0.0276972
TCGA-BL-A0C8-01	Other	BLCA	0.137983	-0.21948
TCGA-BL-A13I-01	Other	BLCA	-0.110201	-0.375085
TCGA-BL-A13J-01	Other	BLCA	0.143593	0.324169
TCGA-BL-A3JM-01	UCHL1-related	BLCA	0.264453	-0.447587
TCGA-BL-A5ZZ-01	Other	BLCA	0.178979	-0.248812
TCGA-BT-A0S7-01	UCHL1-related	BLCA	0.289278	-0.144402
TCGA-BT-A0YX-01	Other	BLCA	-0.0796696	0.478287
TCGA-BT-A20J-01	Other	BLCA	0.248819	-0.361336
TCGA-BT-A20N-01	UCHL1-related	BLCA	0.300764	0.130837
TCGA-BT-A20O-01	Other	BLCA	-0.0549027	-0.338619
TCGA-BT-A20P-01	Other	BLCA	0.238604	-0.30237
TCGA-BT-A20Q-01	Other	BLCA	-0.0685189	0.0714378
TCGA-BT-A20R-01	Other	BLCA	0.27676	-0.321696
TCGA-BT-A20T-01	Other	BLCA	0.0866779	0.294073
TCGA-BT-A20U-01	Other	BLCA	-0.0160382	0.315591
TCGA-BT-A20V-01	UCHL1-related	BLCA	0.31661	-0.244794
TCGA-BT-A20W-01	UCHL1-related	BLCA	0.22312	-0.513057
TCGA-BT-A20X-01	Other	BLCA	-0.125343	0.463578
TCGA-BT-A2LA-01	UCHL1-related	BLCA	0.530861	-0.531591
TCGA-BT-A2LB-01	Other	BLCA	-0.0543062	0.0632488
TCGA-BT-A2LD-01	Other	BLCA	0.0358537	0.0242235
TCGA-BT-A3PH-01	Other	BLCA	-0.100488	0.333076
TCGA-BT-A3PJ-01	Other	BLCA	-0.18241	0.427817
TCGA-BT-A3PK-01	Other	BLCA	-0.143263	0.433513
TCGA-BT-A42C-01	UCHL1-related	BLCA	0.15503	-0.166296
TCGA-BT-A42E-01	Other	BLCA	-0.306276	0.602081
TCGA-BT-A42F-01	Other	BLCA	-0.445437	0.617137
TCGA-C4-A0EZ-01	UCHL1-related	BLCA	0.42646	-0.444182
TCGA-C4-A0F0-01	Other	BLCA	-0.310512	0.412474
TCGA-C4-A0F1-01	Other	BLCA	-0.0922928	0.465701
TCGA-C4-A0F6-01	Other	BLCA	0.202523	-0.0181405
TCGA-C4-A0F7-01	Other	BLCA	0.311318	0.0740665
TCGA-CF-A1HR-01	Other	BLCA	0.0222299	0.0948011
TCGA-CF-A1HS-01	Other	BLCA	-0.177248	0.580611
TCGA-CF-A27C-01	Other	BLCA	-0.217623	0.167723
TCGA-CF-A3MF-01	Other	BLCA	-0.0034926	0.127839
TCGA-CF-A3MG-01	Other	BLCA	-0.0123409	0.339155
TCGA-CF-A3MH-01	Other	BLCA	-0.0771963	0.213405
TCGA-CF-A3MI-01	Other	BLCA	-0.198693	0.323521
TCGA-CF-A47S-01	Other	BLCA	-0.0781649	0.245054
TCGA-CF-A47T-01	UCHL1-related	BLCA	0.0525691	0.15864
TCGA-CF-A47V-01	Other	BLCA	-0.0880564	0.163905
TCGA-CF-A47W-01	Other	BLCA	0.1021	-0.152761
TCGA-CF-A47X-01	Other	BLCA	0.0207284	-0.185178
TCGA-CF-A47Y-01	Other	BLCA	-0.0197011	-0.0895994
TCGA-CF-A5U8-01	Other	BLCA	-0.0214599	0.0130452
TCGA-CF-A5UA-01	Other	BLCA	0.245895	-0.0679075
TCGA-CF-A7I0-01	Other	BLCA	-0.0758612	-0.0681094
TCGA-CF-A8HX-01	UCHL1-related	BLCA	0.0104528	-0.0566395
TCGA-CF-A8HY-01	Other	BLCA	0.187663	0.239568
TCGA-CF-A9FF-01	Other	BLCA	-0.0122397	-0.0719677
TCGA-CF-A9FH-01	Other	BLCA	-0.101934	0.0824146
TCGA-CF-A9FL-01	Other	BLCA	0.118041	-0.0895732
TCGA-CF-A9FM-01	Other	BLCA	-0.0344445	0.0862864
TCGA-CU-A0YN-01	Other	BLCA	-0.341668	0.664269
TCGA-CU-A0YO-01	Other	BLCA	-0.0174144	0.298018
TCGA-CU-A0YR-01	Other	BLCA	-0.0798889	-0.0816166
TCGA-CU-A3KJ-01	Other	BLCA	0.0533858	0.472129
TCGA-CU-A3QU-01	Other	BLCA	0.201522	0.0524373
TCGA-CU-A3YL-01	UCHL1-related	BLCA	0.0609511	-0.0632842
TCGA-CU-A5W6-01	Other	BLCA	0.051136	0.109462
TCGA-CU-A72E-01	Other	BLCA	-0.261527	0.403585
TCGA-DK-A1A3-01	UCHL1-related	BLCA	0.247845	-0.0927601
TCGA-DK-A1A5-01	Other	BLCA	-0.157735	0.143987
TCGA-DK-A1A6-01	Other	BLCA	-0.240362	-0.0286918
TCGA-DK-A1A7-01	UCHL1-related	BLCA	0.32267	-0.310331
TCGA-DK-A1AA-01	Other	BLCA	-0.219514	0.189019
TCGA-DK-A1AB-01	Other	BLCA	0.22893	0.367887
TCGA-DK-A1AC-01	Other	BLCA	-0.00030335	-0.394611
TCGA-DK-A1AD-01	UCHL1-related	BLCA	0.121552	-0.310022
TCGA-DK-A1AE-01	UCHL1-related	BLCA	0.263258	-0.404477
TCGA-DK-A1AF-01	Other	BLCA	-0.0397014	0.290872
TCGA-DK-A1AG-01	Other	BLCA	-0.0815691	-0.132616
TCGA-DK-A2HX-01	Other	BLCA	0.299086	-0.0638959
TCGA-DK-A2I1-01	Other	BLCA	0.104442	-0.168235
TCGA-DK-A2I2-01	Other	BLCA	-0.163349	0.444708
TCGA-DK-A2I4-01	Other	BLCA	-0.0628593	0.197942
TCGA-DK-A2I6-01	Other	BLCA	-0.030737	0.245742
TCGA-DK-A3IK-01	Other	BLCA	0.11268	-0.216692
TCGA-DK-A3IL-01	UCHL1-related	BLCA	0.267863	-0.161942
TCGA-DK-A3IM-01	Other	BLCA	0.0078281	0.592755
TCGA-DK-A3IN-01	Other	BLCA	-0.027892	-0.105443
TCGA-DK-A3IQ-01	Other	BLCA	0.296116	-0.00229952
TCGA-DK-A3IS-01	Other	BLCA	-0.062254	-0.0330646
TCGA-DK-A3IT-01	Other	BLCA	-0.12822	0.0190632
TCGA-DK-A3IU-01	Other	BLCA	-0.0988257	0.218426
TCGA-DK-A3IV-01	Other	BLCA	-0.107704	-0.303528
TCGA-DK-A3WW-01	Other	BLCA	-0.395465	0.579053
TCGA-DK-A3WX-01	Other	BLCA	-0.398452	0.557007
TCGA-DK-A3WY-01	Other	BLCA	-0.0434741	-0.477109
TCGA-DK-A3X1-01	UCHL1-related	BLCA	0.084382	-0.0820274
TCGA-DK-A3X2-01	Other	BLCA	0.158636	0.0423699
TCGA-DK-A6AV-01	Other	BLCA	-0.152137	-0.061267
TCGA-DK-A6AW-01	Other	BLCA	0.0591192	-0.117507
TCGA-DK-A6B0-01	Other	BLCA	0.0302901	-0.0850345
TCGA-DK-A6B1-01	Other	BLCA	0.106895	-0.36902
TCGA-DK-A6B2-01	Other	BLCA	0.182397	-0.224876
TCGA-DK-A6B5-01	Other	BLCA	0.155664	0.209792
TCGA-DK-A6B6-01	Other	BLCA	0.0583221	-0.00162932
TCGA-DK-AA6L-01	Other	BLCA	-0.179865	0.171836
TCGA-DK-AA6M-01	Other	BLCA	-0.288963	0.27724
TCGA-DK-AA6P-01	UCHL1-related	BLCA	0.351705	-0.330294
TCGA-DK-AA6Q-01	Other	BLCA	0.179723	0.171494
TCGA-DK-AA6R-01	Other	BLCA	-0.172835	0.658399
TCGA-DK-AA6S-01	Other	BLCA	0.307409	-0.319862
TCGA-DK-AA6T-01	Other	BLCA	-0.196862	-0.50647
TCGA-DK-AA6U-01	UCHL1-related	BLCA	0.232922	-0.323292
TCGA-DK-AA6W-01	UCHL1-related	BLCA	0.533074	-0.511056
TCGA-DK-AA6X-01	UCHL1-related	BLCA	0.0555416	-0.333672
TCGA-DK-AA71-01	UCHL1-related	BLCA	0.299995	0.154696
TCGA-DK-AA74-01	Other	BLCA	0.00611455	0.28879
TCGA-DK-AA75-01	UCHL1-related	BLCA	0.258325	-0.261063
TCGA-DK-AA76-01	UCHL1-related	BLCA	0.22812	-0.275427
TCGA-DK-AA77-01	Other	BLCA	-0.18489	0.161617
TCGA-E5-A2PC-01	Other	BLCA	-0.0798466	0.301632
TCGA-E5-A4TZ-01	Other	BLCA	0.0022597	0.464373
TCGA-E5-A4U1-01	UCHL1-related	BLCA	0.294715	-0.322324
TCGA-E7-A3X6-01	Other	BLCA	-0.292157	0.37968
TCGA-E7-A3Y1-01	Other	BLCA	-0.157428	-0.100256
TCGA-E7-A4IJ-01	Other	BLCA	0.281248	-0.324961
TCGA-E7-A4XJ-01	UCHL1-related	BLCA	0.0787351	0.353293
TCGA-E7-A519-01	Other	BLCA	0.127981	0.134482
TCGA-E7-A541-01	Other	BLCA	-0.0782517	-0.0261926
TCGA-E7-A5KE-01	UCHL1-related	BLCA	0.109011	-0.320762
TCGA-E7-A5KF-01	Other	BLCA	0.0735556	0.0526423
TCGA-E7-A677-01	Other	BLCA	0.019511	-0.151113
TCGA-E7-A678-01	Other	BLCA	-0.0562365	0.00885903
TCGA-E7-A6MD-01	Other	BLCA	-0.117047	-0.29935
TCGA-E7-A6ME-01	UCHL1-related	BLCA	0.489343	-0.482782
TCGA-E7-A6MF-01	Other	BLCA	0.194823	-0.193823
TCGA-E7-A7DU-01	Other	BLCA	-0.0684584	0.212143
TCGA-E7-A7DV-01	Other	BLCA	-0.281451	0.0844635
TCGA-E7-A7PW-01	UCHL1-related	BLCA	0.1292	-0.42199
TCGA-E7-A7XN-01	Other	BLCA	-0.480402	0.585041
TCGA-E7-A85H-01	UCHL1-related	BLCA	0.122843	-0.239189
TCGA-E7-A8O7-01	Other	BLCA	-0.0771371	0.191807
TCGA-E7-A8O8-01	Other	BLCA	-0.0310893	-0.22473
TCGA-E7-A97P-01	Other	BLCA	-0.40636	0.608104
TCGA-E7-A97Q-01	UCHL1-related	BLCA	0.140407	-0.215265
TCGA-FD-A3B3-01	Other	BLCA	-0.331973	0.592572
TCGA-FD-A3B4-01	Other	BLCA	-0.369233	0.565413
TCGA-FD-A3B5-01	Other	BLCA	0.0325897	0.650124
TCGA-FD-A3B6-01	Other	BLCA	-0.262531	0.261101
TCGA-FD-A3B7-01	Other	BLCA	-0.143204	0.344586
TCGA-FD-A3B8-01	Other	BLCA	0.0305909	-0.017995
TCGA-FD-A3N5-01	Other	BLCA	-0.273209	0.697158
TCGA-FD-A3N6-01	Other	BLCA	-0.351032	0.676114
TCGA-FD-A3NA-01	Other	BLCA	0.0997541	0.261853
TCGA-FD-A3SJ-01	UCHL1-related	BLCA	0.333106	-0.501414
TCGA-FD-A3SL-01	Other	BLCA	0.297547	-0.20866
TCGA-FD-A3SM-01	Other	BLCA	0.12467	-0.101772
TCGA-FD-A3SN-01	Other	BLCA	-0.146231	0.321492
TCGA-FD-A3SO-01	Other	BLCA	-0.38287	0.571255
TCGA-FD-A3SP-01	Other	BLCA	0.132463	-0.343126
TCGA-FD-A3SQ-01	Other	BLCA	0.163049	-0.129907
TCGA-FD-A3SR-01	Other	BLCA	0.148728	-0.128027
TCGA-FD-A3SS-01	Other	BLCA	0.0478536	0.294883
TCGA-FD-A43N-01	Other	BLCA	0.0139323	0.145607
TCGA-FD-A43P-01	UCHL1-related	BLCA	0.341988	-0.411941
TCGA-FD-A43S-01	Other	BLCA	0.06448	-0.128708
TCGA-FD-A43U-01	Other	BLCA	-0.00479823	-0.171198
TCGA-FD-A43X-01	Other	BLCA	-0.0963959	-0.0348685
TCGA-FD-A43Y-01	Other	BLCA	-0.155722	0.527913
TCGA-FD-A5BR-01	Other	BLCA	0.0569185	-0.00100014
TCGA-FD-A5BS-01	Other	BLCA	0.0718083	-0.285992
TCGA-FD-A5BT-01	Other	BLCA	0.125612	0.171438
TCGA-FD-A5BU-01	Other	BLCA	-0.218329	0.636036
TCGA-FD-A5BV-01	UCHL1-related	BLCA	0.207174	-0.126001
TCGA-FD-A5BX-01	Other	BLCA	-0.0737167	-0.206967
TCGA-FD-A5BY-01	Other	BLCA	-0.0631575	0.366711
TCGA-FD-A5BZ-01	Other	BLCA	0.304721	-0.00555677
TCGA-FD-A5C0-01	Other	BLCA	0.0607689	0.228098
TCGA-FD-A5C1-01	Other	BLCA	-0.332636	0.50644
TCGA-FD-A62N-01	Other	BLCA	-0.198975	0.281281
TCGA-FD-A62O-01	Other	BLCA	0.00671338	0.0990877
TCGA-FD-A62P-01	Other	BLCA	-0.136145	0.443239
TCGA-FD-A62S-01	Other	BLCA	-0.200398	0.158615
TCGA-FD-A6TA-01	Other	BLCA	-0.0949119	0.152507
TCGA-FD-A6TB-01	Other	BLCA	0.161433	-0.46687
TCGA-FD-A6TC-01	Other	BLCA	0.0327926	0.019172
TCGA-FD-A6TD-01	Other	BLCA	-0.292115	0.267824
TCGA-FD-A6TE-01	Other	BLCA	-0.0142153	-0.0232337
TCGA-FD-A6TF-01	Other	BLCA	0.289091	-0.0546697
TCGA-FD-A6TG-01	Other	BLCA	0.187832	-0.236803
TCGA-FD-A6TH-01	Other	BLCA	-0.160615	0.030878
TCGA-FD-A6TI-01	Other	BLCA	-0.0824247	0.227505
TCGA-FD-A6TK-01	Other	BLCA	-0.262936	0.100335
TCGA-FJ-A3Z7-01	Other	BLCA	0.160329	-0.43728
TCGA-FJ-A3Z9-01	Other	BLCA	-0.112413	0.416918
TCGA-FJ-A3ZE-01	UCHL1-related	BLCA	0.174547	-0.0165648
TCGA-FJ-A3ZF-01	UCHL1-related	BLCA	0.231585	-0.358086
TCGA-FJ-A871-01	Other	BLCA	0.21886	-0.482636
TCGA-FT-A3EE-01	Other	BLCA	-0.182981	0.207524
TCGA-FT-A61P-01	Other	BLCA	0.0208443	0.322926
TCGA-G2-A2EC-01	Other	BLCA	0.103032	-0.212058
TCGA-G2-A2EF-01	Other	BLCA	-0.172302	-0.0246208
TCGA-G2-A2EJ-01	Other	BLCA	-0.408918	0.714751
TCGA-G2-A2EK-01	Other	BLCA	0.0668347	-0.190877
TCGA-G2-A2EL-01	UCHL1-related	BLCA	0.481435	-0.474684
TCGA-G2-A2EO-01	Other	BLCA	0.183026	-0.353906
TCGA-G2-A2ES-01	Other	BLCA	-0.437854	0.591353
TCGA-G2-A3IB-01	Other	BLCA	-0.229651	0.678579
TCGA-G2-A3IE-01	Other	BLCA	0.0745612	0.0102936
TCGA-G2-A3VY-01	Other	BLCA	0.249319	-0.305066
TCGA-G2-AA3B-01	UCHL1-related	BLCA	-0.0636545	-0.148191
TCGA-G2-AA3C-01	Other	BLCA	-0.254191	-0.2738
TCGA-G2-AA3D-01	Other	BLCA	0.197436	-0.0135994
TCGA-G2-AA3F-01	UCHL1-related	BLCA	0.121781	-0.074157
TCGA-GC-A3BM-01	Other	BLCA	-0.0385611	-0.186971
TCGA-GC-A3I6-01	Other	BLCA	-0.231615	0.562999
TCGA-GC-A3OO-01	Other	BLCA	0.0626899	-0.00277856
TCGA-GC-A3RB-01	UCHL1-related	BLCA	0.24623	-0.197785
TCGA-GC-A3RC-01	Other	BLCA	-0.363953	0.654496
TCGA-GC-A3RD-01	Other	BLCA	0.148239	0.206678
TCGA-GC-A3WC-01	Other	BLCA	-0.065849	-0.269304
TCGA-GC-A3YS-01	Other	BLCA	-0.19095	0.0605814
TCGA-GC-A4ZW-01	UCHL1-related	BLCA	0.314036	-0.252421
TCGA-GC-A6I1-01	Other	BLCA	-0.350472	0.549069
TCGA-GC-A6I3-01	Other	BLCA	0.144658	-0.231086
TCGA-GD-A2C5-01	UCHL1-related	BLCA	-0.0813129	-0.279002
TCGA-GD-A3OP-01	Other	BLCA	0.0682805	-0.182379
TCGA-GD-A3OQ-01	Other	BLCA	-0.261896	0.598296
TCGA-GD-A3OS-01	UCHL1-related	BLCA	0.454594	-0.4884
TCGA-GD-A6C6-01	Other	BLCA	0.220099	-0.0578556
TCGA-GD-A76B-01	Other	BLCA	-0.0167647	-0.236685
TCGA-GU-A42P-01	UCHL1-related	BLCA	0.22592	-0.371401
TCGA-GU-A42Q-01	Other	BLCA	0.218319	0.243251
TCGA-GU-A42R-01	UCHL1-related	BLCA	0.234291	-0.145353
TCGA-GU-A762-01	Other	BLCA	-0.446691	0.202796
TCGA-GU-A763-01	Other	BLCA	-0.0348148	-0.0974294
TCGA-GU-A764-01	Other	BLCA	-0.00171483	0.246109
TCGA-GU-A766-01	Other	BLCA	-0.302756	0.459139
TCGA-GU-A767-01	UCHL1-related	BLCA	0.36503	-0.281962
TCGA-GU-AATO-01	Other	BLCA	0.04624	0.208276
TCGA-GU-AATP-01	Other	BLCA	0.271116	-0.287307
TCGA-GU-AATQ-01	Other	BLCA	0.185419	-0.200254
TCGA-GV-A3JV-01	Other	BLCA	-0.0763396	-0.155945
TCGA-GV-A3JW-01	UCHL1-related	BLCA	0.258624	-0.0815669
TCGA-GV-A3JX-01	UCHL1-related	BLCA	0.286973	-0.161915
TCGA-GV-A3JZ-01	UCHL1-related	BLCA	0.318027	-0.430597
TCGA-GV-A3QF-01	UCHL1-related	BLCA	0.125351	-0.175036
TCGA-GV-A3QG-01	Other	BLCA	0.0325719	-0.317396
TCGA-GV-A3QH-01	UCHL1-related	BLCA	0.384005	-0.349231
TCGA-GV-A3QI-01	UCHL1-related	BLCA	0.440635	-0.285097
TCGA-GV-A3QK-01	Other	BLCA	-0.210979	-0.152937
TCGA-GV-A40E-01	Other	BLCA	-0.0898567	0.325706
TCGA-GV-A40G-01	UCHL1-related	BLCA	0.0637131	-0.230176
TCGA-GV-A6ZA-01	UCHL1-related	BLCA	-0.114695	-0.264889
TCGA-H4-A2HO-01	Other	BLCA	0.0378721	-0.298553
TCGA-H4-A2HQ-01	Other	BLCA	0.280052	-0.276918
TCGA-HQ-A2OE-01	UCHL1-related	BLCA	0.0269739	-0.323235
TCGA-HQ-A2OF-01	UCHL1-related	BLCA	0.288631	-0.250667
TCGA-HQ-A5ND-01	Other	BLCA	-0.0298551	0.258864
TCGA-HQ-A5NE-01	Other	BLCA	-0.218966	0.567092
TCGA-K4-A3WS-01	Other	BLCA	0.255163	-0.404285
TCGA-K4-A3WU-01	Other	BLCA	0.323307	-0.383518
TCGA-K4-A3WV-01	UCHL1-related	BLCA	0.456987	-0.28068
TCGA-K4-A4AB-01	Other	BLCA	0.0828665	-0.0134592
TCGA-K4-A4AC-01	Other	BLCA	-0.399213	0.545518
TCGA-K4-A54R-01	Other	BLCA	-0.0240484	0.296865
TCGA-K4-A5RH-01	Other	BLCA	0.0501486	-0.423612
TCGA-K4-A5RI-01	Other	BLCA	0.0763903	-0.185949
TCGA-K4-A5RJ-01	Other	BLCA	-0.0977104	-0.336686
TCGA-K4-A6FZ-01	Other	BLCA	-0.257459	0.638547
TCGA-K4-A6MB-01	UCHL1-related	BLCA	0.229536	0.0735886
TCGA-K4-A83P-01	Other	BLCA	0.237143	-0.416162
TCGA-K4-AAQO-01	Other	BLCA	0.259898	-0.379423
TCGA-KQ-A41N-01	UCHL1-related	BLCA	0.115222	-0.12829
TCGA-KQ-A41O-01	UCHL1-related	BLCA	0.226348	-0.113603
TCGA-KQ-A41P-01	UCHL1-related	BLCA	0.217089	-0.113602
TCGA-KQ-A41Q-01	UCHL1-related	BLCA	0.081224	-0.304189
TCGA-KQ-A41R-01	UCHL1-related	BLCA	0.0480652	-0.0810939
TCGA-KQ-A41S-01	Other	BLCA	0.0964557	-0.240531
TCGA-LC-A66R-01	Other	BLCA	-0.286302	0.489214
TCGA-LT-A5Z6-01	UCHL1-related	BLCA	0.244219	-0.119322
TCGA-LT-A8JT-01	Other	BLCA	-0.246517	-0.11087
TCGA-MV-A51V-01	Other	BLCA	0.349236	-0.131343
TCGA-PQ-A6FI-01	Other	BLCA	-0.23939	0.539299
TCGA-PQ-A6FN-01	Other	BLCA	-0.243838	0.516841
TCGA-R3-A69X-01	Other	BLCA	0.227069	-0.0822224
TCGA-S5-A6DX-01	Other	BLCA	-0.049948	0.11017
TCGA-S5-AA26-01	UCHL1-related	BLCA	-0.0368759	0.0882226
TCGA-SY-A9G0-01	Other	BLCA	0.303728	-0.336519
TCGA-SY-A9G5-01	Other	BLCA	-0.316133	0.330954
TCGA-UY-A78K-01	Other	BLCA	0.129338	-0.249205
TCGA-UY-A78L-01	Other	BLCA	-0.217343	0.398104
TCGA-UY-A78M-01	Other	BLCA	0.0259017	0.17786
TCGA-UY-A78N-01	UCHL1-related	BLCA	0.293971	-0.462134
TCGA-UY-A78O-01	UCHL1-related	BLCA	0.0121475	-0.149481
TCGA-UY-A78P-01	Other	BLCA	-0.272032	0.38884
TCGA-UY-A8OB-01	Other	BLCA	-0.298411	0.554739
TCGA-UY-A8OC-01	Other	BLCA	-0.244139	0.242196
TCGA-UY-A8OD-01	Other	BLCA	0.183696	-0.282097
TCGA-UY-A9PA-01	Other	BLCA	-0.22248	0.460596
TCGA-UY-A9PB-01	Other	BLCA	-0.261656	0.258683
TCGA-UY-A9PD-01	UCHL1-related	BLCA	0.125277	-0.200632
TCGA-UY-A9PE-01	Other	BLCA	0.275853	-0.236587
TCGA-UY-A9PF-01	Other	BLCA	0.0777684	0.196096
TCGA-UY-A9PH-01	Other	BLCA	-0.268505	0.145503
TCGA-XF-A8HB-01	UCHL1-related	BLCA	0.0490531	-0.0233315
TCGA-XF-A8HC-01	UCHL1-related	BLCA	0.19603	-0.0505538
TCGA-XF-A8HD-01	Other	BLCA	-0.24929	0.225502
TCGA-XF-A8HE-01	Other	BLCA	-0.319003	0.441666
TCGA-XF-A8HF-01	UCHL1-related	BLCA	0.211375	-0.196306
TCGA-XF-A8HG-01	UCHL1-related	BLCA	-0.0648642	-0.0607946
TCGA-XF-A8HH-01	UCHL1-related	BLCA	-0.0447984	-0.200143
TCGA-XF-A8HI-01	Other	BLCA	-0.134514	-0.0259048
TCGA-XF-A9SH-01	UCHL1-related	BLCA	0.0199171	0.10861
TCGA-XF-A9SI-01	Other	BLCA	0.317554	-0.498188
TCGA-XF-A9SJ-01	Other	BLCA	0.0370777	0.277033
TCGA-XF-A9SK-01	Other	BLCA	0.191436	-0.142563
TCGA-XF-A9SL-01	Other	BLCA	0.219318	-0.262981
TCGA-XF-A9SM-01	Other	BLCA	-0.373979	0.256526
TCGA-XF-A9SP-01	Other	BLCA	0.203908	-0.317567
TCGA-XF-A9ST-01	UCHL1-related	BLCA	0.246294	-0.212974
TCGA-XF-A9SU-01	Other	BLCA	0.154484	-0.136787
TCGA-XF-A9SV-01	Other	BLCA	0.0824269	0.193772
TCGA-XF-A9SW-01	Other	BLCA	0.316115	-0.220991
TCGA-XF-A9SX-01	Other	BLCA	-0.0177665	-0.17039
TCGA-XF-A9SY-01	Other	BLCA	-0.229272	0.344189
TCGA-XF-A9SZ-01	Other	BLCA	0.163565	0.126456
TCGA-XF-A9T0-01	UCHL1-related	BLCA	-0.0789092	-0.283697
TCGA-XF-A9T2-01	UCHL1-related	BLCA	0.299497	-0.425994
TCGA-XF-A9T3-01	Other	BLCA	-0.0363915	0.0327344
TCGA-XF-A9T4-01	Other	BLCA	-0.35465	0.533424
TCGA-XF-A9T5-01	Other	BLCA	-0.107952	-0.240735
TCGA-XF-A9T6-01	Other	BLCA	-0.0669363	0.284728
TCGA-XF-A9T8-01	Other	BLCA	-0.348369	0.50085
TCGA-XF-AAME-01	Other	BLCA	0.228112	0.19207
TCGA-XF-AAMG-01	UCHL1-related	BLCA	0.363564	-0.524748
TCGA-XF-AAMH-01	UCHL1-related	BLCA	0.348647	-0.0915182
TCGA-XF-AAMJ-01	Other	BLCA	0.231836	-0.204859
TCGA-XF-AAML-01	UCHL1-related	BLCA	0.286369	-0.0726623
TCGA-XF-AAMQ-01	Other	BLCA	-0.0238331	-0.192417
TCGA-XF-AAMR-01	Other	BLCA	0.225319	-0.207731
TCGA-XF-AAMT-01	Other	BLCA	-0.068144	-0.0307968
TCGA-XF-AAMW-01	Other	BLCA	-0.313384	0.442468
TCGA-XF-AAMX-01	UCHL1-related	BLCA	-0.107166	-0.218202
TCGA-XF-AAMY-01	UCHL1-related	BLCA	0.247256	-0.15177
TCGA-XF-AAMZ-01	UCHL1-related	BLCA	0.0762673	-0.212397
TCGA-XF-AAN0-01	Other	BLCA	-0.0198226	0.0915374
TCGA-XF-AAN1-01	UCHL1-related	BLCA	0.0734038	-0.213476
TCGA-XF-AAN2-01	Other	BLCA	-0.229315	0.656346
TCGA-XF-AAN3-01	Other	BLCA	-0.191081	0.0119512
TCGA-XF-AAN4-01	Other	BLCA	0.153356	-0.215089
TCGA-XF-AAN5-01	Other	BLCA	-0.312723	0.489087
TCGA-XF-AAN7-01	Other	BLCA	0.357417	-0.299762
TCGA-XF-AAN8-01	Other	BLCA	0.199815	-0.233562
TCGA-YC-A89H-01	Other	BLCA	-0.123058	0.438055
TCGA-YC-A8S6-01	Other	BLCA	-0.099646	0.0822843
TCGA-YC-A9TC-01	UCHL1-related	BLCA	0.296316	-0.572851
TCGA-YF-AA3L-01	Other	BLCA	0.0163746	-0.0881824
TCGA-YF-AA3M-01	Other	BLCA	-0.0215806	0.260704
TCGA-ZF-A9R0-01	Other	BLCA	0.098562	0.140194
TCGA-ZF-A9R1-01	UCHL1-related	BLCA	0.141479	-0.126474
TCGA-ZF-A9R2-01	UCHL1-related	BLCA	0.147605	-0.113043
TCGA-ZF-A9R3-01	Other	BLCA	0.0179035	-0.110073
TCGA-ZF-A9R4-01	UCHL1-related	BLCA	-0.0401315	-0.136833
TCGA-ZF-A9R5-01	Other	BLCA	-0.0140163	-0.288792
TCGA-ZF-A9R7-01	Other	BLCA	-0.237625	0.152215
TCGA-ZF-A9R9-01	UCHL1-related	BLCA	0.197373	-0.123924
TCGA-ZF-A9RC-01	UCHL1-related	BLCA	0.374152	-0.210507
TCGA-ZF-A9RD-01	Other	BLCA	-0.337148	0.695094
TCGA-ZF-A9RE-01	Other	BLCA	0.0767863	0.32136
TCGA-ZF-A9RF-01	Other	BLCA	-0.121559	-0.312043
TCGA-ZF-A9RL-01	UCHL1-related	BLCA	0.108082	-0.0271319
TCGA-ZF-A9RM-01	UCHL1-related	BLCA	0.171466	-0.112392
TCGA-ZF-A9RN-01	UCHL1-related	BLCA	0.246066	-0.383788
TCGA-ZF-AA4N-01	Other	BLCA	-0.042283	-0.0262472
TCGA-ZF-AA4R-01	UCHL1-related	BLCA	0.42223	-0.201494
TCGA-ZF-AA4T-01	UCHL1-related	BLCA	0.267887	-0.103779
TCGA-ZF-AA4U-01	Other	BLCA	-0.0858996	0.199936
TCGA-ZF-AA4V-01	Other	BLCA	-0.214383	0.306866
TCGA-ZF-AA4W-01	Other	BLCA	-0.114094	0.512815
TCGA-ZF-AA4X-01	UCHL1-related	BLCA	0.101873	-0.0828979
TCGA-ZF-AA51-01	UCHL1-related	BLCA	0.0663056	-0.0426833
TCGA-ZF-AA52-01	Other	BLCA	0.14805	-0.108525
TCGA-ZF-AA53-01	Other	BLCA	-0.228907	0.546541
TCGA-ZF-AA54-01	Other	BLCA	-0.180255	-0.45476
TCGA-ZF-AA56-01	Other	BLCA	-0.194804	0.451774
TCGA-ZF-AA58-01	Other	BLCA	-0.287542	0.0935219
TCGA-ZF-AA5H-01	Other	BLCA	-0.304134	0.32483
TCGA-ZF-AA5N-01	Other	BLCA	-0.144807	0.393319
TCGA-ZF-AA5P-01	Other	BLCA	0.282616	-0.374402
TCGA-2W-A8YY-01	UCHL1-related	CESC	0.309654	-0.602155
TCGA-4J-AA1J-01	Other	CESC	0.123697	0.274978
TCGA-BI-A0VR-01	Other	CESC	0.10355	0.1797
TCGA-BI-A0VS-01	Other	CESC	0.0270359	0.0906357
TCGA-BI-A20A-01	Other	CESC	0.197183	-0.40677
TCGA-C5-A0TN-01	Other	CESC	0.0696677	0.131564
TCGA-C5-A1BE-01	Other	CESC	0.334895	0.0586329
TCGA-C5-A1BF-01	Other	CESC	0.10246	-0.077686
TCGA-C5-A1BI-01	Other	CESC	-0.390588	0.547337
TCGA-C5-A1BJ-01	Other	CESC	-0.00226215	0.12901
TCGA-C5-A1BK-01	Other	CESC	-0.350681	0.326069
TCGA-C5-A1BL-01	Other	CESC	-0.221354	0.185102
TCGA-C5-A1BM-01	Other	CESC	-0.249175	0.590166
TCGA-C5-A1BN-01	Other	CESC	-0.237747	0.311129
TCGA-C5-A1BQ-01	Other	CESC	-0.191013	0.186826
TCGA-C5-A1M5-01	Other	CESC	0.0714002	-0.167658
TCGA-C5-A1M6-01	UCHL1-related	CESC	0.384472	-0.576091
TCGA-C5-A1M7-01	Other	CESC	-0.434734	0.531568
TCGA-C5-A1M8-01	Other	CESC	0.197124	0.221796
TCGA-C5-A1M9-01	Other	CESC	-0.0169877	-0.231021
TCGA-C5-A1ME-01	Other	CESC	0.206062	-0.269863
TCGA-C5-A1MF-01	Other	CESC	0.262675	-0.153165
TCGA-C5-A1MH-01	Other	CESC	-0.337727	0.354221
TCGA-C5-A1MI-01	UCHL1-related	CESC	0.296232	-0.523001
TCGA-C5-A1MJ-01	UCHL1-related	CESC	0.233794	-0.623613
TCGA-C5-A1MK-01	Other	CESC	-0.152674	0.359922
TCGA-C5-A1ML-01	Other	CESC	0.514139	-0.0680775
TCGA-C5-A1MN-01	Other	CESC	-0.103758	0.530554
TCGA-C5-A1MP-01	Other	CESC	-0.00686762	0.0373763
TCGA-C5-A1MQ-01	Other	CESC	-0.00785206	-0.0794425
TCGA-C5-A2LS-01	UCHL1-related	CESC	0.366219	-0.461294
TCGA-C5-A2LT-01	Other	CESC	-0.251603	-0.00525106
TCGA-C5-A2LV-01	Other	CESC	-0.320008	0.299098
TCGA-C5-A2LX-01	Other	CESC	0.0970875	-0.421726
TCGA-C5-A2LY-01	Other	CESC	-0.102943	0.208663
TCGA-C5-A2LZ-01	Other	CESC	-0.20651	0.411916
TCGA-C5-A2M1-01	Other	CESC	0.0285009	-0.522103
TCGA-C5-A2M2-01	UCHL1-related	CESC	0.212553	-0.440765
TCGA-C5-A3HD-01	Other	CESC	-0.0148487	-0.116365
TCGA-C5-A3HE-01	Other	CESC	-0.1633	-0.331032
TCGA-C5-A3HF-01	UCHL1-related	CESC	0.0730107	-0.382746
TCGA-C5-A3HL-01	Other	CESC	0.343757	0.472196
TCGA-C5-A7CG-01	Other	CESC	-0.200026	-0.458357
TCGA-C5-A7CH-01	Other	CESC	-0.277015	0.720315
TCGA-C5-A7CJ-01	Other	CESC	-0.156275	0.281612
TCGA-C5-A7CK-01	Other	CESC	0.229958	-0.330261
TCGA-C5-A7CL-01	Other	CESC	-0.225415	0.34883
TCGA-C5-A7CM-01	UCHL1-related	CESC	0.127826	-0.388633
TCGA-C5-A7CO-01	UCHL1-related	CESC	-0.022499	-0.0723522
TCGA-C5-A7UC-01	Other	CESC	-0.293452	0.370896
TCGA-C5-A7UE-01	Other	CESC	0.186251	0.512544
TCGA-C5-A7UH-01	UCHL1-related	CESC	-0.158443	0.248097
TCGA-C5-A7UI-01	Other	CESC	-0.133575	0.330045
TCGA-C5-A7X3-01	Other	CESC	-0.21782	-0.211616
TCGA-C5-A7X5-01	Other	CESC	0.0691237	0.306117
TCGA-C5-A7X8-01	Other	CESC	0.33897	-0.472971
TCGA-C5-A7XC-01	Other	CESC	-0.15199	0.293344
TCGA-C5-A8XH-01	Other	CESC	-0.170824	0.437116
TCGA-C5-A8XI-01	Other	CESC	0.276857	-0.28929
TCGA-C5-A8XJ-01	UCHL1-related	CESC	0.414251	-0.443547
TCGA-C5-A8XK-01	Other	CESC	-0.133786	0.245588
TCGA-C5-A8YQ-01	Other	CESC	0.127598	-0.0495493
TCGA-C5-A8YR-01	Other	CESC	-0.285561	-0.239904
TCGA-C5-A8YT-01	Other	CESC	0.323736	-0.617567
TCGA-C5-A8ZZ-01	UCHL1-related	CESC	0.347344	-0.340069
TCGA-C5-A901-01	Other	CESC	-0.148416	0.704705
TCGA-C5-A902-01	Other	CESC	-0.0445567	-0.21689
TCGA-C5-A905-01	UCHL1-related	CESC	0.12628	0.255461
TCGA-C5-A907-01	Other	CESC	-0.3224	0.237583
TCGA-DG-A2KH-01	UCHL1-related	CESC	0.31434	-0.550356
TCGA-DG-A2KJ-01	Other	CESC	0.272352	-0.00611304
TCGA-DG-A2KK-01	Other	CESC	0.156054	-0.336542
TCGA-DG-A2KL-01	Other	CESC	0.0161389	0.33791
TCGA-DG-A2KM-01	Other	CESC	-0.216779	0.176187
TCGA-DR-A0ZL-01	UCHL1-related	CESC	-0.0059074	-0.0985863
TCGA-DR-A0ZM-01	Other	CESC	-0.323224	0.343475
TCGA-DS-A0VK-01	Other	CESC	0.389643	-0.348626
TCGA-DS-A0VL-01	Other	CESC	-0.106699	0.198155
TCGA-DS-A0VM-01	Other	CESC	-0.0559004	0.0708279
TCGA-DS-A0VN-01	Other	CESC	-0.473239	0.641743
TCGA-DS-A1O9-01	Other	CESC	-0.189262	0.206582
TCGA-DS-A1OA-01	Other	CESC	-0.0901203	0.34299
TCGA-DS-A1OB-01	Other	CESC	-0.166548	-0.0181357
TCGA-DS-A1OC-01	Other	CESC	0.0423286	-0.0700985
TCGA-DS-A1OD-01	UCHL1-related	CESC	0.242289	-0.454661
TCGA-DS-A3LQ-01	UCHL1-related	CESC	0.430172	-0.223111
TCGA-DS-A5RQ-01	Other	CESC	0.138973	0.658606
TCGA-DS-A7WF-01	UCHL1-related	CESC	0.307914	-0.532148
TCGA-DS-A7WH-01	Other	CESC	0.220576	-0.242884
TCGA-DS-A7WI-01	Other	CESC	-0.0109619	0.388015
TCGA-EA-A1QS-01	Other	CESC	0.237885	-0.28487
TCGA-EA-A1QT-01	UCHL1-related	CESC	0.193445	-0.21514
TCGA-EA-A3HQ-01	Other	CESC	-0.193184	0.0436008
TCGA-EA-A3HR-01	Other	CESC	0.0207123	0.391257
TCGA-EA-A3HS-01	Other	CESC	-0.0190659	0.330618
TCGA-EA-A3HT-01	Other	CESC	-0.041774	0.460769
TCGA-EA-A3HU-01	Other	CESC	-0.0756259	0.0994229
TCGA-EA-A3QD-01	Other	CESC	-0.215835	-0.397661
TCGA-EA-A3QE-01	Other	CESC	-0.280461	0.565358
TCGA-EA-A3Y4-01	Other	CESC	-0.351084	0.283008
TCGA-EA-A410-01	UCHL1-related	CESC	0.29392	-0.585992
TCGA-EA-A411-01	UCHL1-related	CESC	0.157707	-0.485892
TCGA-EA-A439-01	UCHL1-related	CESC	0.408278	-0.550423
TCGA-EA-A43B-01	Other	CESC	-0.0736965	0.409179
TCGA-EA-A44S-01	Other	CESC	-0.0479886	0.343506
TCGA-EA-A4BA-01	UCHL1-related	CESC	0.335826	-0.532359
TCGA-EA-A50E-01	Other	CESC	-0.227263	0.4317
TCGA-EA-A556-01	UCHL1-related	CESC	0.396298	-0.560077
TCGA-EA-A5FO-01	UCHL1-related	CESC	0.362439	-0.450789
TCGA-EA-A5O9-01	Other	CESC	-0.0308115	0.370156
TCGA-EA-A5ZD-01	Other	CESC	-0.406565	0.453531
TCGA-EA-A5ZE-01	Other	CESC	-0.087376	-0.469716
TCGA-EA-A5ZF-01	UCHL1-related	CESC	0.441473	-0.599973
TCGA-EA-A6QX-01	Other	CESC	-0.0240424	0.0486214
TCGA-EA-A78R-01	Other	CESC	-0.129037	0.3663
TCGA-EA-A97N-01	Other	CESC	0.0266825	0.210615
TCGA-EK-A2GZ-01	Other	CESC	0.294695	0.380879
TCGA-EK-A2H0-01	Other	CESC	-0.473196	0.533164
TCGA-EK-A2H1-01	Other	CESC	-0.141021	0.124464
TCGA-EK-A2IP-01	Other	CESC	-0.14528	0.411411
TCGA-EK-A2IR-01	UCHL1-related	CESC	0.486492	-0.480346
TCGA-EK-A2PG-01	Other	CESC	-0.158691	0.372013
TCGA-EK-A2PI-01	UCHL1-related	CESC	0.484178	-0.276058
TCGA-EK-A2PK-01	Other	CESC	-0.3409	-0.24932
TCGA-EK-A2PL-01	Other	CESC	-0.182264	0.623907
TCGA-EK-A2PM-01	UCHL1-related	CESC	0.377484	-0.216782
TCGA-EK-A2R7-01	UCHL1-related	CESC	0.296802	-0.608006
TCGA-EK-A2R8-01	Other	CESC	-0.245699	0.0439203
TCGA-EK-A2R9-01	UCHL1-related	CESC	0.449164	-0.578816
TCGA-EK-A2RA-01	Other	CESC	-0.305708	0.118119
TCGA-EK-A2RB-01	Other	CESC	-0.113554	0.429066
TCGA-EK-A2RC-01	Other	CESC	-0.138567	0.258084
TCGA-EK-A2RE-01	Other	CESC	-0.220884	0.752467
TCGA-EK-A2RJ-01	Other	CESC	-0.322349	0.404231
TCGA-EK-A2RK-01	Other	CESC	-0.0604569	0.119459
TCGA-EK-A2RL-01	UCHL1-related	CESC	0.275098	-0.440053
TCGA-EK-A2RM-01	UCHL1-related	CESC	0.389516	-0.395523
TCGA-EK-A2RN-01	Other	CESC	-0.215472	0.567697
TCGA-EK-A2RO-01	Other	CESC	0.215275	0.315258
TCGA-EK-A3GJ-01	Other	CESC	-0.49231	0.410369
TCGA-EK-A3GK-01	UCHL1-related	CESC	0.262264	-0.106107
TCGA-EK-A3GM-01	Other	CESC	0.215178	-0.335921
TCGA-EK-A3GN-01	Other	CESC	0.0370197	-0.223871
TCGA-EX-A1H5-01	UCHL1-related	CESC	0.272122	-0.45537
TCGA-EX-A1H6-01	UCHL1-related	CESC	0.297348	-0.423231
TCGA-EX-A3L1-01	Other	CESC	-0.154612	0.379103
TCGA-EX-A449-01	UCHL1-related	CESC	0.180652	-0.509035
TCGA-EX-A69L-01	Other	CESC	-0.250801	-0.0637975
TCGA-EX-A69M-01	Other	CESC	-0.343741	0.0379978
TCGA-EX-A8YF-01	Other	CESC	-0.215228	-0.375888
TCGA-FU-A23K-01	UCHL1-related	CESC	0.0387524	-0.43498
TCGA-FU-A23L-01	Other	CESC	0.204469	-0.250916
TCGA-FU-A2QG-01	Other	CESC	0.00683197	0.506216
TCGA-FU-A3EO-01	Other	CESC	0.24659	-0.101287
TCGA-FU-A3HY-01	Other	CESC	-0.0757331	0.499677
TCGA-FU-A3HZ-01	UCHL1-related	CESC	0.287246	-0.435232
TCGA-FU-A3NI-01	Other	CESC	0.0664871	-0.0694089
TCGA-FU-A3TQ-01	Other	CESC	-0.232654	0.469393
TCGA-FU-A3TX-01	Other	CESC	0.304616	-0.488024
TCGA-FU-A3WB-01	UCHL1-related	CESC	0.221726	-0.312815
TCGA-FU-A3YQ-01	Other	CESC	-0.368596	0.446541
TCGA-FU-A40J-01	UCHL1-related	CESC	0.129116	-0.484508
TCGA-FU-A57G-01	Other	CESC	0.276338	-0.546212
TCGA-FU-A5XV-01	Other	CESC	-0.162636	0.676452
TCGA-FU-A770-01	Other	CESC	0.183004	-0.339078
TCGA-GH-A9DA-01	Other	CESC	-0.364729	0.36441
TCGA-HG-A2PA-01	Other	CESC	0.328255	0.0274625
TCGA-HM-A3JJ-01	Other	CESC	-0.112576	-0.0604623
TCGA-HM-A3JK-01	Other	CESC	0.0748046	-0.330354
TCGA-HM-A4S6-01	Other	CESC	-0.21003	0.290137
TCGA-HM-A6W2-01	UCHL1-related	CESC	0.329516	-0.591509
TCGA-IR-A3L7-01	UCHL1-related	CESC	0.246621	-0.465532
TCGA-IR-A3LA-01	UCHL1-related	CESC	0.209534	-0.557373
TCGA-IR-A3LB-01	Other	CESC	0.183084	-0.366244
TCGA-IR-A3LC-01	Other	CESC	-0.232853	0.142889
TCGA-IR-A3LF-01	UCHL1-related	CESC	0.312701	-0.605044
TCGA-IR-A3LH-01	Other	CESC	-0.13064	-0.304268
TCGA-IR-A3LI-01	UCHL1-related	CESC	0.324638	-0.27478
TCGA-IR-A3LK-01	Other	CESC	-0.183358	0.281227
TCGA-IR-A3LL-01	Other	CESC	-0.264013	0.379797
TCGA-JW-A5VG-01	Other	CESC	-0.308872	0.064425
TCGA-JW-A5VH-01	UCHL1-related	CESC	0.263885	-0.532868
TCGA-JW-A5VI-01	Other	CESC	-0.270902	0.267612
TCGA-JW-A5VJ-01	Other	CESC	0.0405434	0.460628
TCGA-JW-A5VK-01	UCHL1-related	CESC	0.378767	-0.057276
TCGA-JW-A5VL-01	Other	CESC	-0.410988	0.485609
TCGA-JW-A69B-01	Other	CESC	0.23101	-0.461642
TCGA-JW-A852-01	Other	CESC	0.288785	0.1743
TCGA-JW-AAVH-01	UCHL1-related	CESC	0.270823	-0.251489
TCGA-JX-A3PZ-01	Other	CESC	-0.224286	0.346847
TCGA-JX-A3Q0-01	Other	CESC	-0.264642	0.233159
TCGA-JX-A3Q8-01	UCHL1-related	CESC	0.229346	-0.42877
TCGA-JX-A5QV-01	Other	CESC	0.217155	0.407784
TCGA-LP-A4AU-01	Other	CESC	-0.40189	0.650856
TCGA-LP-A4AV-01	Other	CESC	0.0389908	0.337646
TCGA-LP-A4AW-01	Other	CESC	0.264624	-0.47624
TCGA-LP-A4AX-01	Other	CESC	-0.235568	-0.089672
TCGA-LP-A5U2-01	UCHL1-related	CESC	0.250759	-0.452831
TCGA-LP-A5U3-01	Other	CESC	-0.242506	0.457992
TCGA-LP-A7HU-01	UCHL1-related	CESC	-0.0534709	-0.568604
TCGA-MA-AA3W-01	Other	CESC	-0.183313	-0.308848
TCGA-MA-AA3X-01	Other	CESC	-0.211343	0.549864
TCGA-MA-AA3Y-01	Other	CESC	-0.540723	0.638343
TCGA-MA-AA3Z-01	Other	CESC	0.270434	0.179506
TCGA-MA-AA41-01	Other	CESC	-0.160206	0.314419
TCGA-MA-AA42-01	Other	CESC	0.0294357	-0.0969403
TCGA-MA-AA43-01	Other	CESC	0.0977445	0.276157
TCGA-MU-A51Y-01	Other	CESC	-0.116836	0.215084
TCGA-MU-A5YI-01	Other	CESC	0.247417	-0.380353
TCGA-MU-A8JM-01	Other	CESC	-0.0975877	0.481006
TCGA-MY-A5BD-01	UCHL1-related	CESC	0.471615	-0.514878
TCGA-MY-A5BE-01	Other	CESC	-0.0908331	-0.503485
TCGA-MY-A5BF-01	Other	CESC	-0.130153	0.475264
TCGA-MY-A913-01	Other	CESC	-0.281516	0.284675
TCGA-PN-A8MA-01	UCHL1-related	CESC	0.267281	-0.600466
TCGA-Q1-A5R1-01	UCHL1-related	CESC	0.230389	-0.441451
TCGA-Q1-A5R2-01	Other	CESC	0.0897587	0.358085
TCGA-Q1-A5R3-01	Other	CESC	0.267247	0.325423
TCGA-Q1-A6DT-01	Other	CESC	-0.114136	0.431035
TCGA-Q1-A6DV-01	UCHL1-related	CESC	0.323128	-0.546972
TCGA-Q1-A6DW-01	Other	CESC	0.0255496	0.291795
TCGA-Q1-A73O-01	Other	CESC	-0.369881	0.491884
TCGA-Q1-A73P-01	UCHL1-related	CESC	0.140483	-0.436866
TCGA-Q1-A73Q-01	UCHL1-related	CESC	0.409351	-0.467735
TCGA-Q1-A73R-01	UCHL1-related	CESC	0.282641	-0.570488
TCGA-Q1-A73S-01	UCHL1-related	CESC	0.315718	-0.125925
TCGA-R2-A69V-01	Other	CESC	-0.271775	0.425254
TCGA-RA-A741-01	Other	CESC	-0.0188604	-0.177079
TCGA-UC-A7PD-01	Other	CESC	-0.298579	0.602765
TCGA-UC-A7PF-01	Other	CESC	-0.0126426	-0.0208423
TCGA-UC-A7PG-01	Other	CESC	-0.296384	0.685174
TCGA-UC-A7PI-01	UCHL1-related	CESC	0.217944	-0.446265
TCGA-VS-A8EB-01	Other	CESC	0.0455961	-0.189818
TCGA-VS-A8EC-01	UCHL1-related	CESC	0.467382	-0.433245
TCGA-VS-A8EG-01	Other	CESC	0.0809406	0.377654
TCGA-VS-A8EH-01	Other	CESC	0.302768	0.296014
TCGA-VS-A8EI-01	Other	CESC	0.0466571	0.427378
TCGA-VS-A8EJ-01	UCHL1-related	CESC	0.339778	-0.444174
TCGA-VS-A8EK-01	Other	CESC	-0.142111	0.252226
TCGA-VS-A8EL-01	Other	CESC	-0.380817	0.55224
TCGA-VS-A8Q8-01	Other	CESC	-0.373723	0.699695
TCGA-VS-A8Q9-01	Other	CESC	-0.292983	-0.0754923
TCGA-VS-A8QA-01	UCHL1-related	CESC	0.330197	-0.422797
TCGA-VS-A8QC-01	Other	CESC	-0.0671375	0.362878
TCGA-VS-A8QF-01	Other	CESC	-0.310782	0.569884
TCGA-VS-A8QH-01	Other	CESC	-0.064013	-0.32609
TCGA-VS-A8QM-01	Other	CESC	0.0509211	0.260547
TCGA-VS-A94W-01	Other	CESC	-0.00541706	-0.266513
TCGA-VS-A94X-01	Other	CESC	0.0243427	0.227704
TCGA-VS-A94Y-01	Other	CESC	-0.156	0.454018
TCGA-VS-A94Z-01	Other	CESC	-0.136595	-0.329607
TCGA-VS-A950-01	Other	CESC	-0.181789	0.568864
TCGA-VS-A952-01	UCHL1-related	CESC	0.0753502	-0.50641
TCGA-VS-A953-01	Other	CESC	-0.195402	0.432216
TCGA-VS-A954-01	Other	CESC	0.0693638	0.271474
TCGA-VS-A957-01	UCHL1-related	CESC	0.23171	-0.112237
TCGA-VS-A958-01	Other	CESC	-0.320669	0.296106
TCGA-VS-A959-01	Other	CESC	0.154817	-0.184063
TCGA-VS-A9U5-01	UCHL1-related	CESC	-0.0023686	-0.481662
TCGA-VS-A9U6-01	Other	CESC	0.346915	-0.253125
TCGA-VS-A9U7-01	Other	CESC	-0.209011	0.235461
TCGA-VS-A9UB-01	Other	CESC	-0.291512	-0.0230509
TCGA-VS-A9UC-01	Other	CESC	-0.206029	0.403527
TCGA-VS-A9UD-01	Other	CESC	0.0523623	-0.262307
TCGA-VS-A9UH-01	Other	CESC	-0.415805	0.422953
TCGA-VS-A9UI-01	Other	CESC	-0.174839	0.502331
TCGA-VS-A9UJ-01	UCHL1-related	CESC	0.331416	-0.401872
TCGA-VS-A9UL-01	UCHL1-related	CESC	0.506493	-0.590226
TCGA-VS-A9UM-01	Other	CESC	-0.113533	0.319756
TCGA-VS-A9UO-01	UCHL1-related	CESC	0.246501	-0.318435
TCGA-VS-A9UP-01	UCHL1-related	CESC	0.509434	-0.53748
TCGA-VS-A9UQ-01	UCHL1-related	CESC	0.303389	-0.437904
TCGA-VS-A9UR-01	Other	CESC	0.396719	-0.304501
TCGA-VS-A9UT-01	Other	CESC	0.419451	-0.539187
TCGA-VS-A9UU-01	UCHL1-related	CESC	0.0826107	0.558503
TCGA-VS-A9UV-01	Other	CESC	-0.203537	0.321989
TCGA-VS-A9UY-01	Other	CESC	-0.426876	0.529901
TCGA-VS-A9UZ-01	UCHL1-related	CESC	0.373718	-0.513844
TCGA-VS-A9V0-01	UCHL1-related	CESC	0.307691	-0.497864
TCGA-VS-A9V1-01	UCHL1-related	CESC	0.125808	-0.320222
TCGA-VS-A9V2-01	Other	CESC	-0.406734	0.0237127
TCGA-VS-A9V3-01	Other	CESC	-0.0771167	0.388855
TCGA-VS-A9V4-01	UCHL1-related	CESC	0.191355	-0.400368
TCGA-VS-A9V5-01	UCHL1-related	CESC	0.150245	-0.488058
TCGA-VS-AA62-01	Other	CESC	-0.414369	0.382558
TCGA-WL-A834-01	UCHL1-related	CESC	0.224065	0.174848
TCGA-XS-A8TJ-01	Other	CESC	0.0115961	-0.109201
TCGA-ZJ-A8QO-01	Other	CESC	0.268553	-0.560379
TCGA-ZJ-A8QQ-01	Other	CESC	-0.468883	0.568372
TCGA-ZJ-A8QR-01	Other	CESC	-0.293359	0.581126
TCGA-ZJ-AAX4-01	Other	CESC	-0.304308	0.372114
TCGA-ZJ-AAX8-01	Other	CESC	-0.166941	0.40143
TCGA-ZJ-AAXA-01	Other	CESC	-0.147488	0.225975
TCGA-ZJ-AAXB-01	UCHL1-related	CESC	0.358385	-0.462835
TCGA-ZJ-AAXD-01	Other	CESC	0.251605	-0.129826
TCGA-ZJ-AAXF-01	Other	CESC	0.183535	0.391176
TCGA-ZJ-AAXI-01	Other	CESC	0.0212271	0.223732
TCGA-ZJ-AAXJ-01	UCHL1-related	CESC	0.245206	0.27438
TCGA-ZJ-AAXN-01	Other	CESC	-0.336475	0.432311
TCGA-ZJ-AAXT-01	Other	CESC	-0.0594322	0.341118
TCGA-ZJ-AAXU-01	Other	CESC	-0.0723516	0.247278
TCGA-ZJ-AB0H-01	Other	CESC	-0.13413	0.138437
TCGA-ZJ-AB0I-01	Other	CESC	-0.301111	0.621753
TCGA-ZX-AA5X-01	Other	CESC	0.0422019	0.485189
TCGA-3X-AAV9-01	Other	CHOL	0.227441	0.491164
TCGA-3X-AAVA-01	Other	CHOL	-0.179861	-0.170238
TCGA-3X-AAVB-01	Other	CHOL	0.184555	0.428786
TCGA-3X-AAVC-01	Other	CHOL	0.00395634	0.250944
TCGA-3X-AAVE-01	Other	CHOL	-0.0557946	0.199509
TCGA-4G-AAZO-01	Other	CHOL	-0.0496195	0.144649
TCGA-4G-AAZT-01	Other	CHOL	0.134206	0.068783
TCGA-W5-AA2G-01	Other	CHOL	0.0670117	0.0439407
TCGA-W5-AA2H-01	Other	CHOL	-0.243967	-0.184459
TCGA-W5-AA2I-01	UCHL1-related	CHOL	0.135982	-0.0323907
TCGA-W5-AA2O-01	Other	CHOL	-0.0755763	-0.0387572
TCGA-W5-AA2Q-01	UCHL1-related	CHOL	0.0909963	-0.0226414
TCGA-W5-AA2R-01	Other	CHOL	-0.114635	-0.0484305
TCGA-W5-AA2T-01	UCHL1-related	CHOL	0.168419	-0.258292
TCGA-W5-AA2U-01	Other	CHOL	-0.0126104	0.191091
TCGA-W5-AA2W-01	Other	CHOL	-0.092332	-0.283841
TCGA-W5-AA2X-01	UCHL1-related	CHOL	0.115359	0.0771911
TCGA-W5-AA2Z-01	Other	CHOL	0.232561	-0.0946087
TCGA-W5-AA30-01	UCHL1-related	CHOL	0.100765	0.0121908
TCGA-W5-AA31-01	Other	CHOL	0.131675	0.0139853
TCGA-W5-AA33-01	Other	CHOL	0.0423266	0.10781
TCGA-W5-AA34-01	Other	CHOL	0.0786319	-0.160576
TCGA-W5-AA36-01	Other	CHOL	-0.123625	-0.237567
TCGA-W5-AA38-01	Other	CHOL	-0.0122443	-0.00714053
TCGA-W5-AA39-01	Other	CHOL	0.101834	-0.0375139
TCGA-W6-AA0S-01	Other	CHOL	-0.266621	0.185546
TCGA-WD-A7RX-01	Other	CHOL	0.0669907	-0.0478011
TCGA-YR-A95A-01	UCHL1-related	CHOL	0.0552143	-0.0385777
TCGA-ZD-A8I3-01	UCHL1-related	CHOL	0.116938	0.0440532
TCGA-ZH-A8Y1-01	Other	CHOL	0.145262	0.15882
TCGA-ZH-A8Y2-01	Other	CHOL	0.00178167	-0.062972
TCGA-ZH-A8Y4-01	Other	CHOL	0.182708	-0.160357
TCGA-ZH-A8Y5-01	Other	CHOL	0.158134	0.0685211
TCGA-ZH-A8Y6-01	Other	CHOL	0.0935721	0.293431
TCGA-ZH-A8Y8-01	Other	CHOL	-0.0692835	0.333901
TCGA-ZU-A8S4-01	Other	CHOL	-0.285484	0.35072
TCGA-3L-AA1B-01	Other	COAD	0.328009	-0.25969
TCGA-4N-A93T-01	Other	COAD	0.0803089	0.210326
TCGA-4T-AA8H-01	Other	COAD	-0.0554842	0.247956
TCGA-5M-AAT4-01	UCHL1-related	COAD	0.0558305	-0.16478
TCGA-5M-AAT6-01	Other	COAD	0.132249	0.335515
TCGA-5M-AATE-01	UCHL1-related	COAD	0.316122	-0.207126
TCGA-A6-2675-01	Other	COAD	0.274231	0.102833
TCGA-A6-2682-01	Other	COAD	0.23543	0.160406
TCGA-A6-2684-01	Other	COAD	0.0780815	0.207478
TCGA-A6-2685-01	Other	COAD	0.355424	0.165226
TCGA-A6-2686-01	Other	COAD	-0.054065	-0.0997657
TCGA-A6-4105-01	Other	COAD	-0.0749904	-0.24458
TCGA-A6-5656-01	Other	COAD	0.0283815	-0.146566
TCGA-A6-5657-01	Other	COAD	0.252539	-0.25546
TCGA-A6-5659-01	Other	COAD	0.210407	-0.352234
TCGA-A6-5660-01	Other	COAD	0.164397	-0.186171
TCGA-A6-5661-01	Other	COAD	-0.207119	0.399179
TCGA-A6-5662-01	Other	COAD	0.241863	-0.146125
TCGA-A6-5664-01	Other	COAD	0.423804	0.172424
TCGA-A6-5665-01	Other	COAD	-0.189954	0.283702
TCGA-A6-5666-01	UCHL1-related	COAD	0.108119	-0.152997
TCGA-A6-5667-01	Other	COAD	0.326373	-0.100628
TCGA-A6-6137-01	Other	COAD	0.113742	-0.0256684
TCGA-A6-6138-01	Other	COAD	-0.0811209	0.123056
TCGA-A6-6140-01	Other	COAD	0.124116	-0.107222
TCGA-A6-6141-01	Other	COAD	0.217108	0.0199171
TCGA-A6-6142-01	Other	COAD	0.290784	0.27805
TCGA-A6-6648-01	Other	COAD	0.202371	0.0167921
TCGA-A6-6649-01	Other	COAD	0.264194	0.25858
TCGA-A6-6650-01	Other	COAD	0.0643916	-0.109822
TCGA-A6-6651-01	Other	COAD	0.434824	-0.278456
TCGA-A6-6652-01	UCHL1-related	COAD	0.0738887	0.0186582
TCGA-A6-6653-01	Other	COAD	0.08963	0.220288
TCGA-A6-6654-01	Other	COAD	0.162106	0.0446084
TCGA-A6-6780-01	Other	COAD	-0.268421	0.238424
TCGA-A6-6781-01	Other	COAD	0.340644	0.340031
TCGA-A6-6782-01	Other	COAD	0.225786	-0.024342
TCGA-A6-A565-01	Other	COAD	0.0703853	0.196248
TCGA-A6-A566-01	Other	COAD	0.108068	0.164433
TCGA-A6-A567-01	Other	COAD	0.188457	-0.0854646
TCGA-A6-A56B-01	UCHL1-related	COAD	0.223558	-0.255748
TCGA-A6-A5ZU-01	Other	COAD	0.149708	-0.0261739
TCGA-AA-3489-01	Other	COAD	0.213514	-0.183455
TCGA-AA-3492-01	Other	COAD	-0.177537	0.303847
TCGA-AA-3495-01	Other	COAD	-0.00854972	0.116921
TCGA-AA-3496-01	Other	COAD	0.0945027	-0.247788
TCGA-AA-3502-01	Other	COAD	0.0594317	-0.194933
TCGA-AA-3506-01	Other	COAD	0.19246	0.292386
TCGA-AA-3509-01	Other	COAD	0.00640932	0.156329
TCGA-AA-3511-01	Other	COAD	0.0296539	0.0247027
TCGA-AA-3526-01	Other	COAD	0.11196	0.24974
TCGA-AA-3655-01	Other	COAD	0.0531005	0.238004
TCGA-AA-3660-01	Other	COAD	0.0584641	0.0863513
TCGA-AA-3662-01	Other	COAD	-0.0549408	0.167805
TCGA-AA-3663-01	Other	COAD	-0.167414	0.143948
TCGA-AA-3675-01	UCHL1-related	COAD	-0.00390732	0.154942
TCGA-AA-3685-01	Other	COAD	-0.0688934	0.159809
TCGA-AA-3697-01	Other	COAD	-0.116179	-0.16082
TCGA-AA-3712-01	Other	COAD	0.132782	0.00476326
TCGA-AA-3713-01	Other	COAD	-0.199773	0.112322
TCGA-AA-A01P-01	Other	COAD	-0.0936336	0.237288
TCGA-AA-A01X-01	UCHL1-related	COAD	0.252889	-0.0466445
TCGA-AA-A01Z-01	Other	COAD	-0.107792	-0.221087
TCGA-AA-A02K-01	Other	COAD	-0.144368	-0.0418997
TCGA-AA-A02Y-01	Other	COAD	-0.00614632	0.301
TCGA-AD-5900-01	Other	COAD	0.0258063	0.42654
TCGA-AD-6548-01	Other	COAD	-0.271897	0.252869
TCGA-AD-6888-01	Other	COAD	0.230837	0.240315
TCGA-AD-6889-01	Other	COAD	-0.206307	0.199598
TCGA-AD-6890-01	Other	COAD	-0.0180367	0.0850124
TCGA-AD-6895-01	Other	COAD	-0.219369	0.518829
TCGA-AD-6899-01	Other	COAD	0.283994	0.0088358
TCGA-AD-6901-01	Other	COAD	0.210949	0.048875
TCGA-AD-6963-01	Other	COAD	-0.215851	0.137591
TCGA-AD-6964-01	Other	COAD	0.175243	-0.114479
TCGA-AD-6965-01	UCHL1-related	COAD	0.161775	-0.22192
[truncated: 7,673 more rows]

## Sheet: Suppl. Fig. S6A-B
Source data Supplementary Fig. S6A-B: Stratification of established cancer cell lines based on ML model with enrichment for UCHL1-related gene set and UCHL1 expression
Sample ID	Positive gene set [GSVA]	Negative gene set [GSVA]	UCHL1	Prediction
ACH-001113	0.322121	0.175427	9.84923	UCHL1-related
ACH-001289	0.388254	-0.503681	10.08	UCHL1-related
ACH-001339	0.0920864	-0.15913	3.50716	Other
ACH-001538	-0.248871	0.615112	0.831877	Other
ACH-000242	-0.194176	0.346579	1.45943	Other
ACH-000708	-0.145963	0.1775	1.18269	UCHL1-related
ACH-000327	0.419373	0.388864	5.853	Other
ACH-000461	-0.0810069	0.331228	0.687061	Other
ACH-000705	0.385868	-0.0442368	9.18006	UCHL1-related
ACH-001794	-0.299663	0.0365057	8.04489	Other
ACH-002023	0.0435276	0.465887	0	Other
ACH-000528	-0.0534716	0.274913	0.485427	Other
ACH-001655	0.0684723	0.206325	0	Other
ACH-000792	-0.256541	0.176044	8.41113	Other
ACH-001098	-0.115162	0.426914	0	Other
ACH-000570	-0.0421831	-0.442763	8.67726	Other
ACH-000351	0.23969	0.337039	9.42932	Other
ACH-000769	0.415839	-0.318848	9.5935	UCHL1-related
ACH-000154	-0.20764	-0.242529	9.94056	Other
ACH-000828	0.0779496	0.099069	2.15381	Other
ACH-000421	-0.244941	0.190773	3.67694	UCHL1-related
ACH-000765	-0.26626	-0.314051	1.67807	Other
ACH-001375	-0.0834169	0.305581	4.77294	Other
ACH-000008	-0.0839224	-0.223736	1.73552	Other
ACH-001814	-0.250542	-0.0569965	1.21412	Other
ACH-000800	0.456744	-0.430428	7.96555	UCHL1-related
ACH-000606	-0.137845	0.740114	3.43829	Other
ACH-000317	0.250874	-0.0067834	8.11014	Other
ACH-000123	0.243129	-0.376664	1.09085	UCHL1-related
ACH-000723	-0.309529	0.747034	1.82375	Other
ACH-002066	-0.0672597	-0.258557	7.91067	Other
ACH-001536	0.0115225	0.503107	1.74846	Other
ACH-000313	-0.13147	-0.255694	5.36562	Other
ACH-002019	-0.0811045	0.575261	3.8846	Other
ACH-000700	-0.222711	-0.154312	6.09993	Other
ACH-000823	0.425716	0.219725	9.63378	Other
ACH-000678	0.12331	0.50614	9.18814	Other
ACH-002029	-0.318767	0.633351	0.871844	Other
ACH-001377	0.298601	-0.0703095	1.25701	UCHL1-related
ACH-000465	0.106508	-0.422361	5.05615	Other
ACH-000138	0.15428	0.590771	4.89433	Other
ACH-001864	-0.192359	0.379309	3.45549	Other
ACH-000383	-0.351719	0.427379	0.748461	Other
ACH-000917	0.21825	0.378093	1.97085	Other
ACH-000984	-0.396798	-0.502824	1.44361	UCHL1-related
ACH-001409	-0.14809	0.533781	1.39506	Other
ACH-000117	0.0276898	0.28046	1.82375	Other
ACH-000999	0.0672763	0.157063	5.71754	UCHL1-related
ACH-000633	0.0335651	-0.370472	2.64155	UCHL1-related
ACH-000520	0.347536	0.145077	10.2283	Other
ACH-000176	-0.207008	-0.0970458	5.75489	Other
ACH-000017	-0.0930593	0.326578	1.77821	Other
ACH-002022	-0.0724203	0.253703	0	Other
ACH-001385	0.51917	0.186908	8.47273	Other
ACH-000587	-0.362465	0.194645	3.16672	Other
ACH-000785	-0.135279	0.339875	6.62877	Other
ACH-000554	-0.104367	0.231712	3.05311	UCHL1-related
ACH-001398	0.108994	-0.0557608	9.73356	Other
ACH-001991	0.126309	-0.482478	2.57773	UCHL1-related
ACH-001332	0.294914	0.749181	2.65306	Other
ACH-000585	-0.165034	0.603247	2.47508	Other
ACH-000550	-0.199256	-0.291928	1.82782	Other
ACH-000627	-0.089753	0.00382863	2.7866	Other
ACH-000704	0.33565	-0.0661168	1.1635	Other
ACH-000276	0.209131	-0.118551	8.73468	Other
ACH-000075	-0.299611	-0.133083	10.5148	Other
ACH-000818	0.193159	0.0860382	3.90977	Other
ACH-000625	0.029461	-0.295349	5.83289	UCHL1-related
ACH-000941	0.0922106	-0.229009	0.748461	Other
ACH-000392	0.416735	0.540668	4.19298	Other
ACH-000269	-0.339184	-0.244657	1.07039	Other
ACH-001670	0.329109	-0.344423	9.15494	UCHL1-related
ACH-000856	0.0200321	-0.497829	2.96347	UCHL1-related
ACH-000376	-0.267134	-0.22451	9.94685	Other
ACH-000685	0.323439	0.497169	3.16027	Other
ACH-000729	0.424342	-0.528919	11.0933	UCHL1-related
ACH-001034	0.0231191	-0.421799	8.3349	Other
ACH-001283	0.357739	-0.319424	7.94498	UCHL1-related
ACH-000880	-0.473084	-0.0870044	1.21412	UCHL1-related
ACH-000035	-0.154783	0.517162	3.59335	Other
ACH-001200	0.382302	-0.226039	7.52341	UCHL1-related
ACH-000194	-0.287828	-0.133365	7.54094	Other
ACH-000322	-0.106008	-0.38234	0.903038	Other
ACH-000552	-0.226498	0.0702665	1.23879	UCHL1-related
ACH-002508	-0.176533	0.235862	0	Other
ACH-000222	-0.235557	0.328125	0.713696	Other
ACH-000260	0.0729504	-0.467165	9.0673	Other
ACH-001652	0.117653	0.553272	9.24567	Other
ACH-000608	-0.0885374	0.402649	4.97636	Other
ACH-000501	0.0241914	0.60995	3.01792	Other
ACH-001184	0.374607	-0.364482	8.3427	UCHL1-related
ACH-001688	0.398097	0.304404	8.45088	Other
ACH-001838	0.251132	0.650403	4.86839	Other
ACH-000638	-0.455348	0.103368	0.536053	Other
ACH-001846	-0.000594973	0.336433	0.748461	Other
ACH-000798	0.0729785	0.578941	1.848	Other
ACH-000894	0.0885783	0.47793	8.36466	Other
ACH-001559	-0.0857052	0.147833	9.12632	Other
ACH-000344	-0.0375946	0.029381	4.0063	Other
ACH-000223	-0.250875	0.539539	6.66178	Other
ACH-000031	-0.156035	0.517073	1.32769	Other
ACH-001861	-0.135312	0.613915	3.05311	Other
ACH-000772	-0.0588241	-0.29123	5.26566	UCHL1-related
ACH-000946	-0.426191	0.0413642	0.978196	Other
ACH-000596	-0.199321	0.377216	0.594549	Other
ACH-000632	0.00595647	0.0226563	3.63923	Other
ACH-000978	0.238778	-0.390242	9.92563	UCHL1-related
ACH-000332	-0.0818945	0.216347	2.85997	UCHL1-related
ACH-001841	-0.171486	0.699523	0	Other
ACH-000179	0.400689	-0.490617	9.96184	UCHL1-related
ACH-000887	-0.11792	0.532231	9.26505	Other
ACH-000368	-0.121562	-0.166836	9.13432	Other
ACH-000240	-0.214587	-0.0748844	9.50595	Other
ACH-000578	0.133883	0.299052	3.58976	Other
ACH-001611	-0.256921	-0.297458	9.15964	Other
ACH-000135	0.032248	-0.138591	9.35641	Other
ACH-000998	-0.118823	0.222197	1.45418	UCHL1-related
ACH-000441	-0.14106	-0.35215	0.879706	Other
ACH-000098	-0.335293	-0.0912081	9.4843	Other
ACH-001651	0.0670473	0.533062	0	Other
ACH-001456	0.376711	0.436398	1.65992	Other
ACH-001336	0.234003	0.723798	7.63952	Other
ACH-000284	-0.262624	-0.19595	8.67663	Other
ACH-000971	-0.335501	-0.234129	1.32769	UCHL1-related
ACH-001454	0.15412	0.326892	2.66448	Other
ACH-000926	0.0363851	0.33438	1.1635	Other
ACH-000033	0.336603	-0.144678	8.99997	Other
ACH-000019	0.0929982	0.146647	0.748461	Other
ACH-000330	0.0744658	0.112791	1.23879	Other
ACH-000848	-0.0458145	-0.347036	0.687061	UCHL1-related
ACH-000481	0.292033	-0.0627558	9.99605	UCHL1-related
ACH-001517	0.209445	0.0899798	0.15056	UCHL1-related
ACH-001959	-0.0727215	-0.325049	3.33628	UCHL1-related
ACH-001414	-0.00312292	0.585063	0.604071	Other
ACH-000871	0.414813	-0.480605	10.0869	UCHL1-related
ACH-001605	0.099935	-0.194073	9.35359	Other
ACH-001403	0.445338	-0.178353	9.43605	Other
ACH-000805	0.10367	-0.365946	1.81967	Other
ACH-001554	0.318931	-0.292039	0.263034	Other
ACH-000847	0.239117	-0.392242	0.344828	UCHL1-related
ACH-001207	-0.153774	-0.280476	10.2159	Other
ACH-000832	-0.2764	0.728359	3.26754	Other
ACH-000428	0.0422357	0.0672564	9.76143	Other
ACH-001382	-0.00290732	0.558758	0.226509	Other
ACH-001302	0.494191	-0.429272	10.2575	UCHL1-related
ACH-000690	0.273105	0.330455	10.6499	Other
ACH-000858	0.515589	0.631916	8.12153	Other
ACH-001421	0.377304	-0.455354	8.47626	UCHL1-related
ACH-000544	0.374814	0.778594	6.6499	Other
ACH-000725	-0.138222	-0.040024	4.45681	UCHL1-related
ACH-000566	-0.31472	-0.218038	8.32314	Other
ACH-000760	-0.13341	-0.435689	5.04527	Other
ACH-001745	0.411243	-0.35058	7.15279	UCHL1-related
ACH-000787	-0.132397	-0.212676	10.0356	Other
ACH-000749	0.508375	-0.415175	9.23	UCHL1-related
ACH-001328	-0.260265	0.72737	0.189034	Other
ACH-000358	0.418407	-0.407698	9.49821	UCHL1-related
ACH-001654	-0.107965	0.374823	2.97269	Other
ACH-001521	-0.400396	0.550647	0.411426	Other
ACH-000209	0.327797	0.268607	5.55551	Other
ACH-000213	-0.117278	0.540723	0.333424	Other
ACH-001610	-0.00817453	-0.363904	0.15056	Other
ACH-001408	0.0482367	0.561319	7.08587	Other
ACH-000991	-0.382469	0.0428585	2.62761	UCHL1-related
ACH-001412	-0.371475	0.319772	0.422233	Other
ACH-000331	-0.246217	-0.240372	10.7837	Other
ACH-001407	-0.198986	-0.0726479	10.7358	Other
ACH-000580	-0.195401	-0.409903	2.03914	Other
ACH-000594	0.393423	-0.533604	9.91001	UCHL1-related
ACH-000684	0.134134	0.355647	7.79123	Other
ACH-000742	0.00529831	0.238998	9.76804	Other
ACH-000868	0.268225	0.145775	7.75067	Other
ACH-000732	0.156991	0.781084	0.970854	Other
ACH-000429	0.241513	0.258635	0.790772	Other
ACH-000310	0.433309	-0.443353	9.4003	UCHL1-related
ACH-000643	0.42755	0.62464	8.06625	Other
ACH-000234	0.200835	-0.0432335	10.337	Other
ACH-000896	-0.145775	0.404561	2.38128	Other
ACH-000203	0.413852	-0.515201	10.1606	UCHL1-related
ACH-001607	-0.330316	0.298455	0.111031	Other
ACH-001441	0.529141	0.0860472	0	Other
ACH-000186	0.35625	0.542036	4.52732	Other
ACH-000677	-0.219277	-0.339836	2.08066	UCHL1-related
ACH-000055	0.380187	-0.378954	9.15522	UCHL1-related
ACH-000485	-0.0971464	0.369306	0.124328	UCHL1-related
ACH-000672	0.0526937	-0.036868	7.70943	Other
ACH-000784	0.335481	0.0773336	10.3784	UCHL1-related
ACH-000530	0.231005	-0.546315	6.90424	UCHL1-related
ACH-002024	0.364312	-0.291406	8.61886	UCHL1-related
ACH-001400	0.450408	0.762628	0	Other
ACH-001054	0.491134	-0.185165	9.0818	UCHL1-related
ACH-000009	-0.0198358	-0.157121	8.14598	UCHL1-related
ACH-000491	0.0339412	-0.334938	6.9384	UCHL1-related
ACH-001568	0.38974	0.197894	1.69153	Other
ACH-000993	0.331037	0.451633	9.07545	Other
ACH-000711	-0.0218086	0.42036	8.53745	Other
ACH-001515	-0.0189755	0.541934	8.31954	Other
ACH-001020	0.113049	-0.430101	0.214125	UCHL1-related
ACH-000600	-0.0551675	-0.174555	8.67518	Other
ACH-000354	-0.0157918	0.422315	1.27501	Other
ACH-000012	-0.148839	0.383252	1.72247	Other
ACH-000689	0.0955136	-0.128309	9.14555	Other
ACH-000459	-0.119612	-0.0955158	9.71425	Other
ACH-001413	-0.0279701	0.182259	10.3475	Other
ACH-000686	-0.0129157	0.174611	9.71026	Other
ACH-000342	-0.0329004	0.312667	3.87283	Other
ACH-000208	-0.373988	-0.130317	1.4957	Other
ACH-000360	0.0913422	0.287231	1.15056	UCHL1-related
ACH-000249	-0.145904	0.352485	1.89142	Other
ACH-001368	0.254116	-0.248875	1.9222	Other
ACH-000231	-0.122279	-0.330881	9.13612	Other
ACH-000945	-0.226353	-0.197668	6.54055	Other
ACH-000662	-0.102498	0.517439	0.422233	Other
ACH-002458	0.13322	0.0583491	0	Other
ACH-001378	0.234562	0.625978	0.0285692	Other
ACH-001029	0.248697	-0.575407	9.13845	UCHL1-related
ACH-000248	-0.199607	0.360252	2.19219	Other
ACH-000943	-0.201627	-0.292124	0.948601	UCHL1-related
ACH-001016	-0.283128	-0.294328	9.10866	Other
ACH-000282	0.109184	-0.306516	10.6459	Other
ACH-000261	0.0182152	-0.121296	10.0185	Other
ACH-000164	-0.237336	-0.300195	1.24489	Other
ACH-001793	0.205324	0.166885	8.53997	Other
ACH-000262	-0.249601	-0.0430423	7.24089	Other
ACH-000722	-0.165154	0.277361	0.895303	Other
ACH-000857	0.294235	0.720182	8.21965	Other
ACH-001619	0.0720877	0.504075	9.72954	Other
ACH-000184	-0.219864	-0.163271	9.8546	Other
ACH-000329	-0.293764	-0.331691	7.57137	Other
ACH-001569	0.272316	-0.0726863	0.176323	Other
ACH-000814	-0.292347	-0.393424	3.97269	Other
ACH-000545	-0.207663	0.507191	6.64803	Other
ACH-000949	-0.32383	-0.00258413	2.58256	UCHL1-related
ACH-000560	0.19829	-0.402082	2.89918	UCHL1-related
ACH-000897	-0.3594	-0.150528	0.910733	Other
ACH-001626	0.135707	0.722237	5.30232	Other
ACH-000619	-0.0271186	0.692726	2.83592	Other
ACH-001340	0.383234	0.487238	4.13504	Other
ACH-000546	-0.0405801	0.624522	2.79286	Other
ACH-002018	0.342171	-0.150556	0.124328	UCHL1-related
ACH-000153	-0.0832234	0.00466502	9.64997	Other
ACH-000526	-0.0933136	-0.125439	7.96953	Other
ACH-000116	0.343934	-0.182963	7.93628	UCHL1-related
ACH-001270	0.0959795	-0.191323	8.7149	Other
ACH-000324	-0.0996663	-0.150173	8.92354	Other
ACH-001561	0.317675	0.351802	9.35511	Other
ACH-000842	0.402392	0.381583	3.03914	Other
ACH-000898	-0.294727	0.0332895	1.19535	Other
ACH-000517	-0.00764003	0.360172	0.0703893	Other
ACH-001415	-0.151606	0.349625	4.70653	Other
ACH-000681	0.169492	0.117842	9.44433	Other
ACH-000484	-0.100919	-0.0764512	10.6336	Other
ACH-000108	-0.132755	-0.00767054	0.83996	Other
ACH-000808	-0.164477	0.0603847	1.44361	Other
ACH-000997	-0.379914	-0.196538	1.77821	UCHL1-related
ACH-000866	0.340498	-0.502024	10.6809	UCHL1-related
ACH-000819	-0.348189	-0.38199	9.74091	Other
ACH-000087	0.218903	-0.564981	10.0174	UCHL1-related
ACH-000340	-0.26833	-0.248297	8.45841	Other
ACH-002005	-0.138323	-0.366734	0.189034	Other
ACH-000758	-0.423473	-0.0518054	1.87184	Other
ACH-000196	0.31788	0.229686	4.64155	UCHL1-related
ACH-000258	0.0944352	-0.276522	1.25096	UCHL1-related
ACH-000163	-0.192873	-0.366357	8.91558	Other
ACH-001193	0.239892	-0.536812	10.869	UCHL1-related
ACH-000571	-0.323233	-0.236195	9.84383	Other
ACH-000391	0.206919	-0.444717	9.75111	Other
ACH-000293	0.417917	0.242413	9.66126	Other
ACH-000584	0.291951	0.0817779	6.77149	Other
ACH-001690	0.173537	0.801802	0	Other
ACH-000586	0.446818	-0.533539	9.9589	UCHL1-related
ACH-001173	0.279438	0.0509239	9.48125	Other
ACH-001321	0.328759	0.573398	7.15977	Other
ACH-001648	-0.116244	0.80351	7.78751	Other
ACH-000394	0.510811	-0.509649	10.825	UCHL1-related
ACH-000954	-0.399425	-0.336817	1.5509	Other
ACH-001163	0.168263	-0.294649	7.93917	Other
ACH-000160	0.235644	-0.0467477	1.23879	Other
ACH-000989	-0.0947228	-0.297708	2.06695	UCHL1-related
ACH-001347	-0.263461	0.727245	0.137504	Other
ACH-000691	0.240719	0.260237	5.1102	UCHL1-related
ACH-000268	-0.0315609	0.332442	1.65535	UCHL1-related
ACH-000119	-0.272557	-0.228044	7.90479	Other
ACH-000379	-0.226872	0.0275151	2.71149	Other
ACH-001341	0.14682	0.582008	1.75275	UCHL1-related
ACH-001790	0.288765	-0.47907	7.65557	UCHL1-related
ACH-001673	-0.059149	0.459317	9.26477	Other
ACH-000300	-0.164413	0.157265	9.3779	Other
ACH-000901	-0.311828	-0.0888285	9.06692	Other
ACH-000816	0.469365	-0.501243	9.59761	UCHL1-related
ACH-000511	-0.437204	0.0287151	8.631	Other
ACH-000836	-0.394496	0.569734	1.97085	Other
ACH-000975	-0.0580207	-0.119827	8.43833	Other
ACH-000109	-0.0997328	0.426379	3.86493	Other
ACH-000467	0.0258348	0.296812	2.74846	UCHL1-related
ACH-000712	0.0705136	-0.323625	3.75382	UCHL1-related
ACH-000671	0.380781	0.073843	1.17632	UCHL1-related
ACH-000523	0.471553	-0.539406	9.74918	UCHL1-related
ACH-000864	0.452888	-0.491567	9.20543	UCHL1-related
ACH-000726	0.166158	0.392476	9.6198	Other
ACH-000136	0.463126	-0.342234	10.0192	UCHL1-related
ACH-002067	0.240382	-0.138973	10.2002	Other
ACH-001461	0.377877	0.479182	2.81147	Other
ACH-000890	-0.320352	-0.305031	8.51763	Other
ACH-001692	-0.202643	0.771789	0	Other
ACH-000027	0.0521446	-0.29041	1.25701	Other
ACH-000562	-0.292717	0.367735	1.58015	Other
ACH-000748	-0.243011	-0.379295	4.98778	Other
ACH-000834	0.0132237	0.65202	2.28392	Other
ACH-000565	-0.019551	0.436641	0.757023	Other
ACH-000449	-0.0806411	-0.360805	10.1568	UCHL1-related
ACH-000399	0.363582	-0.446143	10.2416	UCHL1-related
ACH-000710	0.0355438	-0.0798134	1.05658	Other
ACH-000507	-0.215657	0.276695	0.555816	UCHL1-related
ACH-000066	0.0289736	0.11232	4.64616	Other
ACH-000022	0.0247657	0.160419	1.98914	UCHL1-related
ACH-001668	0.58024	0.166661	7.51806	UCHL1-related
ACH-000374	-0.0095352	0.403835	4.31179	Other
ACH-000908	-0.321565	-0.119791	0.739848	UCHL1-related
ACH-002003	0.0408998	-0.16903	0	Other
ACH-000574	0.390553	-0.213438	9.34512	Other
ACH-000148	-0.123505	-0.0180129	0.903038	Other
ACH-002461	0.193955	0.341403	0	Other
ACH-000646	0.449014	0.534586	6.42576	Other
ACH-000314	-0.315418	-0.171002	1.60407	Other
ACH-000040	-0.448428	-0.280923	4.57531	Other
ACH-000430	-0.409363	-0.197578	0.704872	Other
ACH-001041	0.0267354	-0.410382	0.31034	UCHL1-related
ACH-000370	0.0917868	-0.300189	6.25701	Other
ACH-001630	0.460095	0.551838	3.51475	Other
ACH-000437	-0.334892	-0.261786	6.20555	Other
ACH-001392	0.512054	0.482095	0.422233	Other
ACH-000503	0.364779	0.748678	8.77076	Other
ACH-000328	-0.203785	-0.32543	9.21118	Other
ACH-000403	-0.287463	0.328844	2.52857	Other
ACH-000400	0.0617659	0.318535	1.37851	Other
ACH-000224	-0.073188	-0.0516557	9.04988	Other
ACH-000318	0.358634	0.519398	4.6094	Other
ACH-001430	0.210506	-0.457947	8.47642	UCHL1-related
ACH-000928	-0.0122006	0.0827171	3.92315	Other
ACH-000893	0.293557	-0.243366	9.08356	Other
ACH-000799	0.313819	-0.268267	0.594549	Other
ACH-001623	0.000802212	-0.295622	9.79279	Other
ACH-000736	-0.371509	0.326436	0.963474	Other
ACH-000876	0.0100262	0.351775	4.97591	Other
ACH-001232	-0.212985	-0.132185	6.79831	Other
ACH-000235	-0.132105	0.61409	1.01436	Other
ACH-000381	-0.206671	0.37091	0.650765	Other
ACH-001301	0.418938	-0.522246	9.99421	UCHL1-related
ACH-000187	0.389793	-0.475186	10.2589	UCHL1-related
ACH-000543	0.108949	0.00789687	8.10884	Other
ACH-000569	0.115492	0.171477	10.1746	Other
ACH-000668	-0.362817	0.485747	4.38336	Other
ACH-000134	-0.203722	-0.185021	6.72574	Other
ACH-000924	-0.0704146	-0.0552192	9.28857	Other
ACH-000296	0.00167284	0.112573	0.887525	Other
ACH-000713	0.436215	0.278139	9.45065	Other
ACH-001360	0.0875506	0.489523	4.43829	Other
ACH-000273	-0.226889	-0.010304	4.61765	Other
ACH-001715	-0.1385	-0.0739903	9.1918	Other
ACH-000639	0.36001	-0.456211	9.34751	UCHL1-related
ACH-000590	0.493755	0.484466	8.65087	Other
ACH-000553	-0.195477	0.377557	9.01853	Other
ACH-000094	-0.176513	0.515953	1.40599	Other
ACH-000361	0.088406	0.151043	7.28771	Other
ACH-000719	0.291437	0.321437	2.1635	Other
ACH-001396	0.280812	0.34434	0.226509	Other
ACH-001848	0.288464	0.659137	2.26303	Other
ACH-000339	-0.298934	0.157463	1.63227	Other
ACH-000789	0.374439	-0.481808	10.5436	UCHL1-related
ACH-000413	0.0204464	-0.166075	9.54348	Other
ACH-000125	-0.220565	-0.168037	9.13209	Other
ACH-000180	-0.282796	-0.0932472	7.57183	Other
ACH-000215	-0.37679	-0.228772	8.45759	Other
ACH-001001	0.308758	0.0210832	9.20345	Other
ACH-000407	0.396831	0.0740621	10.03	Other
ACH-002027	0.338957	0.495374	3.82273	Other
ACH-001278	0.298341	0.0375357	8.2943	UCHL1-related
ACH-001419	0.420841	0.534161	3.90785	Other
ACH-000865	0.170429	-0.0163568	1.62761	UCHL1-related
ACH-001523	-0.320191	0.65945	0.526069	Other
ACH-000674	0.119869	0.304617	0.584963	Other
ACH-000670	0.344605	-0.363949	9.04385	UCHL1-related
ACH-000599	-0.313596	0.261232	0.286881	Other
ACH-000303	-0.360785	-0.0483895	1.87184	Other
ACH-001551	0.466086	-0.0799587	8.26247	Other
ACH-000793	-0.332402	0.245396	0.925999	Other
ACH-002511	0.252722	-0.153228	2.62293	Other
ACH-000286	0.282063	0.538673	7.96157	Other
ACH-000250	-0.0925053	-0.234524	2.88947	Other
ACH-000139	0.280803	0.696768	1.36737	Other
ACH-001389	-0.0359028	-0.37103	0.250962	Other
ACH-001183	-0.281235	0.540208	0.978196	Other
ACH-000037	-0.154922	0.201715	7.38802	Other
ACH-000744	0.207602	0.468078	8.41625	Other
ACH-000420	-0.0339953	-0.323409	3.74524	Other
ACH-000486	0.37015	0.497934	8.26318	Other
ACH-000679	-0.0152603	0.368527	0.978196	UCHL1-related
ACH-001557	-0.164183	0.109765	9.38355	Other
ACH-000247	-0.165883	0.16274	0.823749	UCHL1-related
ACH-000947	-0.0351622	-0.453072	2.01078	UCHL1-related
ACH-000807	0.0692924	0.0706811	9.37071	Other
ACH-000476	-0.13275	-0.122839	0.613532	Other
ACH-000525	0.440742	-0.556604	9.76014	UCHL1-related
ACH-000853	0.356182	-0.433433	8.49045	UCHL1-related
ACH-000083	-0.17657	-0.182219	7.81006	Other
ACH-000479	0.0139224	-0.324301	10.2413	Other
ACH-000230	0.370843	0.262929	10.0719	Other
ACH-001664	-0.131859	-0.218246	0.137504	UCHL1-related
ACH-000955	-0.21971	-0.0230206	3.35473	UCHL1-related
ACH-000675	0.224431	0.0410797	6.38819	Other
ACH-000199	0.159696	-0.047354	9.13098	Other
ACH-000538	0.0563889	-0.456229	8.6153	UCHL1-related
ACH-000010	0.339727	-0.501277	9.03127	UCHL1-related
ACH-001649	-0.0704666	0.675322	5.7137	Other
ACH-000155	-0.0768082	0.489575	0.9855	Other
ACH-000270	0.0666205	0.525624	0.933573	Other
ACH-000683	0.5352	0.424435	9.66835	UCHL1-related
ACH-002017	0.356769	-0.260659	9.19673	UCHL1-related
ACH-000655	0.156757	-0.202906	9.59734	Other
ACH-000145	-0.412075	-0.207243	6.36352	Other
ACH-001495	0.513055	0.205144	9.64091	Other
ACH-000188	0.171346	0.777241	7.39609	Other
ACH-000415	0.460513	0.744721	1.59932	Other
ACH-001518	0.203862	-0.0228594	10.4219	Other
ACH-000891	-0.0794911	0.0171159	9.16797	Other
ACH-001625	-0.326071	0.703679	8.26945	Other
ACH-000895	-0.29689	0.195866	0.933573	UCHL1-related
ACH-000851	0.265682	0.334653	3.25852	UCHL1-related
ACH-000824	-0.155477	0.579353	0.411426	Other
ACH-000506	0.486708	-0.477703	11.145	UCHL1-related
ACH-000540	0.029085	-0.058333	9.66155	Other
ACH-000185	-0.0100375	-0.0321969	8.46769	Other
ACH-000568	0.314221	0.275969	2.17632	Other
ACH-000603	0.443321	-0.109212	10.3621	Other
ACH-000680	-0.0200369	0.0451175	0.356144	UCHL1-related
ACH-002460	0.195849	0.0268714	0.0703893	Other
ACH-000111	0.286256	0.198028	9.39062	Other
ACH-000618	-0.0620293	0.550983	4.65306	Other
ACH-000470	-0.0485987	0.347366	2.40327	UCHL1-related
ACH-002039	-0.202798	0.539414	0	Other
ACH-000118	-0.0904102	0.472166	2.52607	Other
ACH-000614	0.0336642	-0.349323	1.22033	Other
ACH-001078	-0.0282231	0.473533	1.24489	Other
ACH-000556	-0.408502	-0.0654775	4.33271	Other
ACH-001804	-0.073149	-0.0211503	4.15543	Other
ACH-001386	0.429136	-0.421042	10.4242	UCHL1-related
ACH-001525	0.141807	0.803989	1.23879	Other
ACH-000014	-0.0172842	-0.246479	2.59932	Other
ACH-000637	0.268512	0.612067	2.08746	Other
ACH-000455	0.153176	0.191427	8.12428	Other
ACH-000389	0.0483478	-0.259741	11.0009	Other
ACH-000129	0.149718	-0.223258	1.848	UCHL1-related
ACH-000490	-0.036627	0.636277	2.57046	Other
ACH-000434	-0.217209	0.154215	9.55827	Other
ACH-001086	-0.0302039	0.229985	4.37643	Other
ACH-002042	-0.221614	0.693446	0	Other
ACH-000597	0.125066	-0.490678	6.51365	UCHL1-related
ACH-000756	-0.126763	-0.248223	9.50764	Other
ACH-000396	-0.251984	-0.141195	3.51096	Other
ACH-000089	-0.250825	0.202374	0.918386	Other
ACH-000265	-0.0144503	-0.356229	2.56316	Other
ACH-000132	0.276628	0.320281	3.53481	Other
ACH-000216	0.0372082	0.449693	5.74147	Other
ACH-000613	0.22847	-0.379153	9.76381	Other
ACH-000855	-0.5446	0.434835	0.298658	Other
ACH-000906	-0.0448771	0.121669	9.68127	Other
ACH-000348	-0.402795	-0.109109	5.34518	Other
ACH-000238	-0.118734	0.686913	2.41414	Other
ACH-000237	-0.0174978	0.215171	1.98914	Other
ACH-000393	-0.388348	-0.371321	10.701	Other
ACH-000623	0.1842	-0.280964	10.1821	Other
ACH-000359	-0.105776	-0.150893	7.46907	Other
ACH-001028	0.507969	0.292881	8.46357	Other
ACH-000621	0.128495	-0.372377	5.8125	Other
ACH-000483	0.333353	-0.250764	9.77205	Other
ACH-000514	0.444184	-0.531687	9.84262	UCHL1-related
ACH-000051	0.202508	-0.513818	9.17891	UCHL1-related
ACH-000043	-0.0720098	0.0123829	9.11541	Other
ACH-000936	0.00745789	0.248736	0.823749	Other
ACH-000716	-0.0748344	-0.0437645	2.58736	Other
ACH-000988	0.112407	-0.302532	1.80323	Other
ACH-000952	-0.260991	-0.444103	1.36737	UCHL1-related
ACH-000609	-0.336189	-0.250387	9.88437	Other
ACH-001411	-0.300914	0.588651	0.163499	Other
ACH-000504	-0.0781837	-0.148691	6.63212	Other
ACH-000956	0.176603	-0.498326	2.07039	UCHL1-related
ACH-001712	0.0665514	-0.0888604	9.06803	Other
ACH-000652	-0.185819	-0.248444	2.51349	Other
ACH-000414	-0.0796625	0.340771	3.41414	Other
ACH-000472	0.160956	0.767952	0.632268	Other
ACH-000007	-0.18139	0.321982	0.454176	UCHL1-related
ACH-000446	0.387371	-0.321994	9.08558	Other
ACH-001850	-0.333081	0.311895	0	Other
ACH-000755	0.259487	0.371534	0.659925	Other
ACH-000028	0.151048	-0.100297	1.54597	Other
ACH-000665	-0.056657	0.223692	10.6584	Other
ACH-000078	0.389772	-0.441438	8.84238	Other
ACH-002046	-0.169981	-0.198541	8.52826	Other
ACH-000397	-0.0136084	-0.0186586	8.75422	UCHL1-related
ACH-000229	-0.0310249	0.0597106	8.15421	Other
ACH-000518	-0.421305	0.673186	1.01436	Other
ACH-001566	0.273727	-0.0196069	6.02237	Other
ACH-000252	-0.257434	0.0972704	7.79448	Other
ACH-000572	0.0190593	-0.427903	2.71809	Other
ACH-000277	-0.146181	-0.113137	2.9279	Other
ACH-001239	-0.00293991	-0.288964	2.42223	Other
ACH-000803	0.329068	-0.391053	8.58241	UCHL1-related
ACH-002038	-0.114304	0.028485	0.941106	UCHL1-related
ACH-000537	-0.0537949	0.215479	1.27501	Other
ACH-000724	-0.36957	0.604825	0.9855	Other
ACH-000522	-0.330377	-0.230919	7.29149	Other
ACH-001549	0.460398	-0.455258	10.257	Other
ACH-000706	0.111799	0.205841	4.70044	Other
ACH-000737	0.473452	-0.338709	11.3054	UCHL1-related
ACH-000548	-0.405737	0.70778	1.48027	Other
ACH-001839	0.285773	0.245025	1.91456	Other
ACH-001799	0.221124	-0.142561	8.76112	Other
ACH-000425	0.0195972	-0.324018	1.32193	Other
ACH-000375	-0.158375	-0.334277	1.01436	Other
ACH-000753	-0.0705337	-0.329875	10.2054	Other
ACH-000275	-0.0891222	-0.0207758	9.85999	Other
ACH-000735	-0.0912837	0.732041	3.58256	Other
ACH-001067	0.28668	-0.198284	7.92029	Other
ACH-001394	0.310668	0.692823	2.05658	Other
ACH-000404	-0.0349743	-0.343177	0.773996	Other
ACH-000882	-0.0628988	-0.226593	0.575312	Other
ACH-001509	-0.0178252	0.814726	0	Other
ACH-000210	0.393608	-0.416859	7.68047	Other
ACH-000254	-0.101992	0.807742	1.22651	Other
ACH-000090	0.291749	0.503111	1.1635	Other
ACH-001791	0.402672	0.383591	6.91145	Other
ACH-001650	-0.315651	0.383203	1.31034	Other
ACH-000605	0.405308	0.0824221	8.68829	UCHL1-related
ACH-000458	-0.4999	0.536313	1.26903	Other
ACH-000251	-0.0102192	0.139825	8.84618	Other
ACH-001194	-0.13914	-0.120233	6.03958	Other
ACH-001443	-0.327511	-0.154775	0	Other
ACH-000688	-0.227832	0.341434	8.4022	Other
ACH-001627	0.217116	0.712948	6.78712	Other
ACH-000951	0.0580883	0.15696	5.47897	Other
ACH-000547	-0.320726	0.459615	1.29866	Other
ACH-000826	-0.31323	0.604233	9.55253	Other
ACH-001751	0.381599	-0.291082	7.8042	UCHL1-related
ACH-000018	-0.54782	-0.125091	1.18903	Other
ACH-000721	0.00631476	-0.207757	0.765535	Other
ACH-000003	0.268457	0.283554	7.25314	Other
ACH-000092	-0.395482	0.0377794	10.5531	Other
ACH-000669	0.196772	0.310352	3.20477	Other
ACH-001099	0.00207303	-0.398301	0.613532	Other
ACH-000648	0.13888	-0.202399	9.46972	Other
ACH-000950	0.0054088	0.156521	2.43296	UCHL1-related
ACH-000367	-0.263552	0.278121	9.88441	Other
ACH-000589	0.0113847	0.341621	8.89751	Other
ACH-001522	0.288222	-0.216542	1.98914	Other
ACH-000831	-0.17871	-0.186908	5.86121	Other
ACH-000424	0.235956	-0.514914	9.78816	UCHL1-related
ACH-000409	0.437504	0.164214	6.2636	Other
ACH-000616	-0.460142	-0.0721267	1.46989	Other
ACH-000628	-0.31501	0.526037	4.23573	Other
ACH-000232	0.0308577	-0.465505	10.6033	Other
ACH-000820	-0.205051	0.230792	2.11103	UCHL1-related
ACH-001295	0.354478	-0.429237	8.96411	UCHL1-related
ACH-001164	0.446694	0.311901	5.12557	Other
ACH-000645	0.115105	0.0941342	10.516	Other
ACH-000099	0.423614	-0.388891	8.91692	UCHL1-related
ACH-000902	0.0968726	-0.287815	5.3466	Other
ACH-000649	-0.393163	-0.134819	10.2523	Other
ACH-000086	-0.0611055	0.220563	8.23606	Other
ACH-000149	0.216094	-0.567061	9.49683	Other
ACH-000142	-0.126309	0.602202	4.53419	Other
ACH-000227	0.415879	-0.486715	9.73224	UCHL1-related
ACH-000264	0.076197	-0.147479	1.69599	Other
ACH-000809	-0.0828481	0.468809	1.18903	Other
ACH-000100	0.0728224	-0.431484	5.98048	UCHL1-related
ACH-000060	-0.434468	0.324014	1.18903	Other
ACH-000001	0.423049	0.052962	9.85943	Other
ACH-000957	-0.223992	0.201342	1.0072	UCHL1-related
ACH-000650	-0.104116	-0.431436	1.33914	Other
ACH-001196	0.331777	-0.36406	9.0545	UCHL1-related
ACH-000239	-0.083819	0.143615	6.98914	UCHL1-related
ACH-000762	-0.370279	0.717428	2.5656	Other
ACH-000859	-0.383914	0.402335	3.26454	Other
ACH-000990	-0.250619	-0.352576	0.863938	Other
ACH-000410	-0.00414804	-0.403113	10.4144	Other
ACH-000927	0.111102	-0.0195815	2.31904	UCHL1-related
ACH-001853	0.0817643	0.275243	0	Other
ACH-000694	-0.137201	0.696199	3.64386	Other
ACH-000935	-0.0946083	-0.126557	1.68706	Other
ACH-000761	-0.22718	0.472688	2.98003	Other
ACH-001563	-0.158437	-0.00166851	0.124328	Other
ACH-000974	-0.143591	-0.0235613	0.765535	Other
ACH-000297	0.451492	-0.399797	11.3724	UCHL1-related
ACH-001719	0.430646	-0.02556	9.19145	UCHL1-related
ACH-000243	-0.172102	0.457997	0.918386	Other
ACH-001418	0.412501	0.527997	9.48579	Other
ACH-000843	-0.0710464	0.32974	4.21645	Other
ACH-000840	-0.273757	0.124216	7.58826	Other
ACH-001852	-0.0548933	0.69697	2.95606	Other
ACH-001528	-0.302533	0.140623	0	Other
ACH-000016	0.236212	0.25638	8.0167	Other
ACH-000165	-0.190061	-0.26123	9.73108	Other
ACH-001460	0.339546	0.407296	0.214125	Other
ACH-000592	0.0330226	-0.350589	9.32832	Other
ACH-001192	0.242766	-0.519309	8.56963	UCHL1-related
ACH-000741	0.301191	0.485329	7.43229	Other
ACH-000912	-0.0100959	-0.415731	10.5242	Other
ACH-000529	-0.257925	0.0349998	8.82193	Other
ACH-000508	0.348745	-0.467017	11.3587	UCHL1-related
ACH-000577	-0.247556	0.27432	0.879706	Other
ACH-000768	-0.367765	0.17024	2.33628	Other
ACH-000667	0.205085	0.579136	9.7524	Other
ACH-000905	-0.236093	0.550401	1.89142	Other
ACH-001494	0.103506	0.58988	0.0285692	Other
ACH-002510	0.234642	-0.0713229	0	Other
ACH-001303	0.550277	-0.270398	9.92822	UCHL1-related
ACH-000026	-0.000797341	-0.145197	1.15704	Other
ACH-001172	0.0382679	-0.335762	9.86759	Other
ACH-000822	0.013605	-0.187561	6.75729	Other
ACH-000531	0.160357	0.22119	9.87117	Other
ACH-000349	-0.111252	-0.325089	1.0072	UCHL1-related
ACH-000527	0.337127	0.307756	3.13422	Other
ACH-000279	0.206825	-0.535955	10.8609	UCHL1-related
ACH-000516	-0.153975	-0.294418	9.20335	Other
ACH-000812	-0.113468	-0.461875	1.4489	Other
ACH-001300	0.495675	-0.423457	9.14119	Other
ACH-000524	0.29486	0.00723337	9.1122	Other
ACH-000411	-0.251468	0.0130504	6.06953	Other
ACH-000718	0.0775244	0.261858	7.70307	Other
ACH-000903	-0.124033	0.0671863	2.09761	Other
ACH-000433	0.25068	0.282265	11.3305	Other
ACH-000499	0.438446	-0.428958	9.81184	UCHL1-related
ACH-000278	0.347432	0.393026	8.57217	Other
ACH-000202	0.271431	-0.350179	9.73257	UCHL1-related
ACH-001379	-0.219033	0.477083	0.321928	Other
ACH-000128	0.247873	-0.45567	8.83213	Other
ACH-000696	0.304246	0.0345543	9.84649	Other
ACH-000041	0.20305	-0.578692	9.68622	UCHL1-related
ACH-000214	-0.197756	-0.0444841	8.17318	Other
ACH-000747	-0.10633	-0.468704	9.92163	Other
ACH-001307	-0.425385	0.268755	7.58158	Other
ACH-000341	0.125685	-0.586717	10.2215	UCHL1-related
ACH-001740	0.09421	-0.513052	8.94691	UCHL1-related
ACH-000417	-0.389962	0.485005	1.43296	Other
ACH-000120	0.157632	-0.477703	10.616	Other
ACH-001694	-0.335745	0.707352	0	Other
ACH-001542	0.309992	0.744916	1.848	Other
ACH-002509	0.311144	-0.378046	8.41477	Other
ACH-000438	-0.370876	0.0656513	1.0635	Other
ACH-001366	0.477559	-0.328385	9.62503	UCHL1-related
ACH-000532	-0.0841466	0.427979	2.33628	Other
ACH-000839	0.0874046	0.82267	1.07039	Other
ACH-000673	-0.347533	-0.244291	6.61132	Other
ACH-001524	-0.287601	0.522192	1.62293	Other
ACH-000323	-0.313132	-0.148696	1.80735	Other
ACH-000021	0.271748	-0.0281752	7.82311	Other
ACH-001863	-0.0920793	0.352888	0	Other
ACH-000980	0.33661	-0.581489	9.38942	UCHL1-related
ACH-000734	0.0843131	-0.118052	9.56923	Other
ACH-000845	-0.280823	0.323	1.14405	Other
ACH-000730	0.272768	-0.301427	0.464668	Other
ACH-001334	-0.0420461	0.696317	4.69432	Other
ACH-000698	0.385173	-0.460362	10.8952	UCHL1-related
ACH-000802	-0.133756	0.655909	6.98493	Other
ACH-001836	-0.218794	0.479354	5.1819	Other
ACH-000573	0.0994019	-0.00642769	10.0244	Other
ACH-001699	0.0210426	0.777631	0.475085	Other
ACH-000963	-0.187981	-0.0818222	1.58496	UCHL1-related
ACH-001567	0.312068	-0.0910162	0.389567	Other
ACH-001653	0.282406	0.487775	8.38785	Other
ACH-000852	-0.250757	0.298087	3.78346	Other
ACH-001862	-0.32652	0.406075	0	Other
ACH-000661	-0.209959	-0.450144	1.1635	Other
ACH-001500	-0.0634915	-0.359796	8.4882	Other
ACH-001190	-0.0877738	-0.280686	2.31325	Other
ACH-000364	0.285895	-0.283998	1.30451	Other
ACH-000448	-0.102915	0.730532	1.852	Other
ACH-000932	-0.233592	-0.498591	0.565597	UCHL1-related
ACH-000783	-0.151843	-0.139783	1.12433	Other
ACH-002044	0.332539	-0.321288	8.75295	UCHL1-related
ACH-002459	0.132414	0.322942	0.214125	Other
ACH-000976	-0.00496056	0.571896	0.555816	Other
ACH-001516	0.492017	-0.516183	10.2029	UCHL1-related
ACH-001354	0.435169	-0.485596	9.89034	UCHL1-related
ACH-001645	0.162065	-0.197593	0.495695	Other
ACH-000867	0.335658	0.42101	5.92458	Other
ACH-000304	-0.144708	-0.475312	1.29866	Other
ACH-002069	0.318913	-0.325496	8.66786	Other
ACH-000931	0.27511	-0.450574	8.32481	UCHL1-related
ACH-001374	0.32582	-0.393504	8.86285	UCHL1-related
ACH-000302	0.516335	0.368456	8.31601	Other
ACH-000305	0.237367	0.568826	9.27001	Other
ACH-000766	-0.0351286	0.622671	8.44473	Other
ACH-000533	0.165929	-0.216707	1.09085	Other
ACH-000343	0.202193	-0.525134	10.0945	UCHL1-related
ACH-000171	0.159615	-0.145811	9.9059	Other
ACH-000173	0.290069	0.134495	8.63412	Other
ACH-000535	-0.288141	0.666016	2.45418	Other
ACH-000774	0.22041	0.702983	4.83036	Other
ACH-000178	-0.42566	0.392812	1.05658	Other
ACH-001306	-0.300298	0.0550588	6.94556	Other
ACH-000994	-0.0663111	-0.485533	1.65076	UCHL1-related
ACH-000804	0.386725	-0.501796	10.7067	UCHL1-related
ACH-000011	0.236799	-0.0796315	1.37295	Other
ACH-000733	-0.177793	-0.056432	4.49825	Other
ACH-001603	0.550477	-0.185264	8.08034	UCHL1-related
ACH-000141	-0.0163197	0.46363	8.68608	Other
ACH-000810	-0.275819	-0.344461	0.903038	Other
ACH-001145	0.032514	-0.502201	0.238787	Other
ACH-000717	-0.0217508	0.490401	7.79292	Other
ACH-000738	-0.242623	-0.325394	8.7951	Other
ACH-001843	0.262624	-0.154454	0.163499	Other
ACH-000780	0.419708	-0.52745	9.63791	UCHL1-related
ACH-001548	0.48579	-0.375841	11.5796	UCHL1-related
ACH-000759	0.29913	0.347081	1.18269	Other
ACH-001555	-0.0620509	0.183378	10.8849	Other
ACH-001369	0.316478	0.48102	5.30488	Other
ACH-000969	-0.17191	0.0871974	1.09761	UCHL1-related
ACH-000873	0.610705	0.471409	8.78673	Other
ACH-001275	0.215843	-0.420865	7.732	UCHL1-related
ACH-000921	-0.233872	-0.310661	10.1294	Other
ACH-001373	0.514124	0.236837	9.61217	Other
ACH-001022	0.146813	-0.524504	8.78274	UCHL1-related
ACH-000082	-0.108972	-0.361258	10.4463	Other
ACH-000488	-0.124418	0.718677	6.31125	Other
ACH-000790	0.255841	-0.48694	9.677	UCHL1-related
ACH-000172	0.0240225	-0.443213	8.45722	Other
ACH-000647	-0.0655145	0.211792	0.659925	Other
ACH-002001	0.124741	-0.0536737	0.238787	Other
ACH-002446	0.293571	0.298707	4.93074	Other
ACH-000201	0.0904048	-0.116076	9.54668	Other
ACH-000435	0.402712	0.594912	9.06113	Other
ACH-000965	-0.308452	0.462418	0.925999	Other
ACH-001550	0.127713	-0.380686	9.05932	Other
ACH-002026	-0.15735	-0.0422521	0.0426443	Other
ACH-000883	-0.255783	-0.0803303	7.47078	Other
ACH-000482	-0.31511	0.388505	1.63691	Other
ACH-000450	-0.0542055	-0.32424	0.83996	Other
ACH-000835	-0.423064	-0.0474456	9.15702	Other
ACH-001802	0.283719	-0.163336	7.62322	Other
ACH-000629	-0.309936	-0.182829	10.0042	Other
ACH-000715	-0.330473	0.736395	2.56316	Other
ACH-000870	0.485061	-0.535199	9.83317	UCHL1-related
ACH-000910	-0.202405	-0.178213	3.1127	UCHL1-related
ACH-000779	-0.00296561	0.498167	10.238	Other
ACH-001096	0.240444	-0.340481	7.70619	UCHL1-related
ACH-000693	0.195923	0.433441	9.26526	Other
ACH-000811	-0.0482325	-0.149755	5.03606	Other
ACH-000423	0.0627049	-0.288221	0.659925	Other
ACH-000290	0.33932	-0.610641	10.6854	UCHL1-related
ACH-001519	0.356102	-0.27624	7.41304	UCHL1-related
ACH-000110	-0.00748035	0.492989	1.60407	Other
ACH-001497	0.0837805	0.548271	1.4489	Other
ACH-000102	-0.220199	-0.133329	8.68633	Other
ACH-001556	0.00362766	-0.132663	9.77383	Other
ACH-000378	-0.0100866	0.391736	10.287	Other
ACH-000913	-0.314045	0.150202	9.34034	Other
ACH-000575	-0.05033	0.063579	4.11187	Other
ACH-000634	-0.144813	-0.422728	9.51387	Other
ACH-001322	0.147762	-0.419798	10.06	UCHL1-related
ACH-000767	0.403712	-0.582476	9.94251	UCHL1-related
ACH-001552	0.401232	-0.248232	8.48273	Other
ACH-000451	0.0622997	0.383799	6.91851	Other
ACH-000879	0.252034	-0.452107	9.61747	Other
ACH-001842	-0.0146162	0.574166	5.71012	Other
ACH-001032	0.446277	-0.381046	8.73156	UCHL1-related
ACH-000982	-0.175285	-0.252334	2.12102	UCHL1-related
ACH-000189	0.0385526	0.183426	7.54257	Other
ACH-000454	0.372295	0.286232	9.55605	UCHL1-related
ACH-000131	-0.255722	-0.24728	9.1578	Other
ACH-000915	0.101648	-0.299	0.505891	Other
ACH-000480	0.191828	-0.1313	6.21607	UCHL1-related
ACH-000161	-0.0216718	0.358306	0.963474	Other
ACH-000395	0.345321	-0.415365	9.54953	UCHL1-related
ACH-001459	0.302188	0.344913	0.713696	Other
ACH-000916	0.101861	0.273442	1.26903	Other
ACH-001609	-0.0105015	-0.0691894	9.2417	Other
ACH-001960	0.368748	0.432634	10.1866	UCHL1-related
ACH-001856	0.299701	0.197775	0.214125	Other
ACH-000292	0.426298	-0.499426	9.35286	UCHL1-related
ACH-000137	0.00700689	-0.153892	9.30275	Other
ACH-000308	-0.100547	-0.251542	10.4044	Other
ACH-000445	-0.159873	-0.289708	9.59304	Other
ACH-001229	-0.124569	0.666404	6.615	Other
ACH-000144	0.355339	0.222017	3.14241	Other
ACH-000837	-0.193443	0.393925	2.20789	Other
ACH-000048	0.378128	-0.485374	8.91385	UCHL1-related
ACH-000463	0.303168	0.0077354	10.6147	Other
ACH-000881	-0.0722038	-0.332172	0.807355	Other
ACH-000147	0.0457445	-0.00364558	2.32193	Other
ACH-000930	0.0733354	0.0148964	6.50303	Other
ACH-000899	-0.15424	-0.357567	2.02503	Other
ACH-000366	0.377865	-0.563533	10.1923	UCHL1-related
ACH-001526	0.273868	-0.149677	0.695994	Other
ACH-001329	0.120782	-0.141251	9.6503	Other
ACH-000418	-0.125082	-0.215927	1.4957	Other
ACH-001280	0.298212	-0.382725	7.64731	UCHL1-related
ACH-000861	-0.0758351	-0.174938	10.049	Other
ACH-000692	-0.0680629	0.673447	1.79494	Other
ACH-000107	-0.243763	0.495141	2.03562	Other
ACH-000133	-0.218686	-0.394677	9.38731	Other
ACH-000306	0.00638639	-0.110148	7.42945	Other
ACH-001530	0.0613967	0.21726	0.189034	Other
ACH-000651	-0.0517302	-0.333936	0.356144	UCHL1-related
ACH-000563	-0.403077	0.0927373	1.0635	Other
ACH-000058	0.178023	-0.173372	1.80735	Other
ACH-000345	0.379311	-0.506375	10.3917	UCHL1-related
ACH-000316	-0.337304	-0.156623	1.38957	Other
ACH-000884	-0.362385	-0.225608	0.722466	Other
ACH-000289	0.176013	-0.209384	1.61353	Other
ACH-001451	-0.000227501	0.300846	8.57826	Other
ACH-000355	0.339025	-0.469878	9.28218	UCHL1-related
ACH-000962	0.398342	-0.252769	0.575312	Other
ACH-000473	-0.415513	0.589112	1.7137	Other
ACH-000192	0.539575	-0.209428	9.45214	UCHL1-related
ACH-001624	0.170336	-0.00368494	6.76301	Other
ACH-001807	0.0582881	0.0108294	6.62073	Other
ACH-001344	0.134995	-0.225843	8.2823	Other
ACH-000757	0.203106	-0.158002	8.29944	Other
ACH-000054	-0.289861	-0.122771	0.632268	Other
ACH-001318	0.0730444	-0.321751	7.76534	Other
ACH-000601	0.0381887	-0.00865739	0.887525	Other
ACH-000635	0.322782	0.259171	5.08449	Other
ACH-001857	0.278079	-0.0313993	8.27743	Other
ACH-000966	0.101049	-0.190387	3.17313	Other
ACH-000630	-0.515203	0.224237	1.16993	Other
ACH-000225	0.280235	-0.428184	7.68566	UCHL1-related
ACH-000657	0.285938	-0.420002	7.16289	UCHL1-related
ACH-000624	0.47326	0.634839	8.16621	Other
ACH-000699	-0.114228	0.123842	9.41414	Other
ACH-000044	0.0904623	-0.310366	1.48543	UCHL1-related
ACH-000740	0.0116667	0.609588	7.51979	Other
ACH-000447	-0.248965	0.140482	9.34325	Other
ACH-001416	-0.120895	0.365549	3.87381	Other
ACH-000319	0.101976	-0.102799	10.2447	Other
ACH-000280	-0.233611	0.650441	6.63329	Other
ACH-001835	0.104376	0.198534	8.4424	Other
ACH-000892	0.0174598	0.0101887	0.941106	Other
ACH-000493	-0.293899	-0.0993602	7.20389	Other
ACH-000042	0.0484256	0.59785	1.81147	Other
ACH-002045	0.300616	0.471332	9.02661	Other
ACH-000221	0.180621	-0.514052	9.30047	UCHL1-related
ACH-000093	-0.309979	0.548914	2.58256	Other
ACH-000477	0.0508895	-0.276832	2.46205	Other
ACH-000746	0.22414	-0.431096	8.60855	UCHL1-related
ACH-000356	-0.0169353	-0.00166692	1.87184	UCHL1-related
ACH-000457	0.244935	0.00349812	9.70231	Other
ACH-000904	0.319736	-0.517524	10.2876	UCHL1-related
ACH-000244	-0.127139	-0.414024	10.5056	Other
ACH-000610	0.436671	-0.570363	9.57845	UCHL1-related
ACH-000255	-0.383922	-0.107251	0.992768	Other
ACH-001038	0.335196	-0.49825	9.12083	Other
ACH-000352	0.061798	-0.110702	1.33914	Other
ACH-002016	0.308832	-0.019985	7.91839	Other
ACH-000416	-0.118607	0.108161	10.4149	Other
ACH-000752	-0.297854	-0.431123	10.1897	Other
ACH-000862	-0.264549	0.51822	1.90689	Other
ACH-000236	-0.225432	0.288266	2.24793	Other
ACH-000401	-0.0259842	-0.276914	1.36737	Other
ACH-000731	-0.0426752	0.123113	3.77926	Other
ACH-000875	0.0143236	0.397962	9.36951	Other
ACH-000593	-0.175868	0.382959	3.80941	Other
ACH-000182	0.0746182	0.442615	0.555816	Other
ACH-000442	-0.0193775	-0.138916	9.42484	Other
ACH-000159	-0.334579	-0.0503508	7.97206	Other
ACH-000907	0.246255	0.0289062	7.42358	Other
ACH-000191	-0.145618	0.252373	8.3531	Other
ACH-000205	-0.325772	0.506958	1.0635	Other
ACH-000103	0.45934	0.199363	7.62892	Other
ACH-000739	0.338	-0.0514339	0.731183	UCHL1-related
ACH-001558	-0.145359	-0.0520009	9.15145	Other
ACH-000841	0.0406642	0.191644	6.34696	Other
ACH-000615	0.22526	-0.110181	4.7703	Other
ACH-001608	-0.239215	0.200437	9.47255	Other
ACH-000801	0.144428	-0.366078	1.40054	Other
ACH-000539	-0.222586	-0.156342	6.93357	Other
ACH-000464	0.281181	-0.0234549	8.86326	Other
ACH-000622	0.171807	-0.569335	8.57327	UCHL1-related
ACH-000452	0.294126	0.276777	7.73118	Other
ACH-001390	0.311867	0.618231	1.95977	Other
ACH-001401	0.313151	-0.448296	9.15969	UCHL1-related
ACH-001431	0.319667	-0.418677	7.53356	UCHL1-related
ACH-000475	0.101287	0.229833	1.24489	Other
ACH-000860	-0.12763	0.0478779	5.87652	Other
ACH-000377	-0.271096	0.532123	2.80529	Other
ACH-001562	-0.154479	0.158954	9.84106	Other
ACH-000259	0.445986	-0.422357	9.90902	UCHL1-related
ACH-001388	0.501589	0.801568	0	Other
ACH-001410	-0.0515721	0.0470716	0.214125	UCHL1-related
ACH-002025	0.167621	0.496019	0.321928	Other
ACH-000720	-0.264986	-0.0238641	9.63467	Other
ACH-000095	0.368829	-0.41361	8.37938	UCHL1-related
ACH-001345	0.107742	0.254269	0.941106	UCHL1-related
ACH-000558	-0.184767	-0.323099	10.124	Other
ACH-000177	0.371138	-0.437599	9.86748	UCHL1-related
ACH-000335	-0.197897	-0.159994	10.7246	Other
ACH-000940	-0.11111	-0.564642	1.10434	UCHL1-related
ACH-000631	-0.235975	-0.335215	8.90851	Other
ACH-000207	0.161197	0.613943	7.29627	Other
ACH-000764	-0.253002	-0.0645689	6.66064	Other
ACH-000709	0.204045	0.23225	1.55582	Other
ACH-000846	-0.255421	0.450699	2.488	Other
ACH-001702	0.295055	-0.176666	8.77722	UCHL1-related
ACH-000333	-0.176045	0.260427	1.65992	Other
ACH-000929	-0.192104	0.383596	7.70612	Other
ACH-001395	0.383914	0.440124	0	Other
ACH-000948	-0.394088	0.0265484	4.62527	Other
ACH-002015	0.247188	-0.126094	9.91761	Other
ACH-000617	0.337289	0.386711	5.34731	Other
ACH-000311	0.210644	0.573611	10.5039	Other
ACH-001210	-0.13372	-0.46757	1.23266	UCHL1-related
ACH-001834	-0.137941	0.290539	7.21276	Other
ACH-000390	0.189147	0.522714	10.4954	Other
ACH-000468	-0.326496	-0.00321192	0.201634	Other
ACH-001061	-0.288795	0.17823	0.263034	Other
ACH-000456	-0.201339	0.322462	6.68496	Other
ACH-000496	0.0953758	-0.22624	10.2589	Other
ACH-000062	0.151017	0.142289	10.5623	Other
ACH-000088	-0.153106	-0.15874	8.24479	Other
ACH-000536	-0.358972	0.155702	0.815575	Other
ACH-000071	-0.264558	-0.300178	0.799087	Other
ACH-002004	0.133423	-0.345662	0.250962	Other
ACH-000878	-0.331795	-0.0972505	9.90716	Other
ACH-001380	0.329459	0.237931	0.475085	Other
ACH-000385	-0.100159	0.157842	1.14405	Other
ACH-000412	-0.182764	0.597753	1.30451	Other
ACH-000427	-0.144041	0.510334	1.33342	UCHL1-related
ACH-000939	-0.245767	-0.388366	6.96509	Other
ACH-000325	-0.323866	0.106929	1.0072	UCHL1-related
ACH-000515	0.430899	-0.564874	10.2951	UCHL1-related
ACH-001033	0.100429	-0.326784	8.78758	Other
ACH-000919	-0.212658	0.207215	0.516015	UCHL1-related
ACH-000863	0.274504	-0.0582598	9.2996	Other
ACH-000581	-0.129793	-0.0906986	0.443607	UCHL1-related
ACH-001050	0.109615	-0.045263	0.0840643	Other
ACH-001818	0.140387	0.205612	8.61835	Other
ACH-001384	0.255386	0.336449	8.87722	Other
ACH-000797	-0.20878	-0.0592734	9.47843	Other
ACH-000827	-0.1067	-0.112171	1.59455	Other
ACH-000961	0.456382	-0.396199	6.47994	UCHL1-related
ACH-000778	-0.517838	0.648051	0.918386	Other
ACH-000825	-0.0213378	0.350686	0.545968	Other
ACH-000743	0.416328	-0.44739	9.85382	UCHL1-related
ACH-001819	0.0139704	-0.0403926	0.201634	UCHL1-related
ACH-001786	0.268914	0.387054	0.163499	Other
ACH-000253	-0.403667	0.102407	0.632268	Other
ACH-001376	0.293494	0.574483	0.790772	Other
ACH-000958	-0.251571	-0.317	2.01078	UCHL1-related
ACH-000228	0.00854068	0.693127	7.61331	Other
ACH-000266	-0.142354	0.673032	0.970854	Other
ACH-001750	0.146995	-0.236055	9.10342	Other
ACH-000174	-0.00762339	-0.242997	9.35209	Other
ACH-001279	0.0894629	-0.191365	8.35116	UCHL1-related
ACH-000620	0.345597	0.13805	7.34323	Other
ACH-000813	-0.204591	0.539874	11.054	Other
ACH-001513	0.334264	0.578471	8.9941	Other
ACH-000257	0.498618	-0.484364	10.4443	UCHL1-related
ACH-000211	0.116977	-0.284195	9.60914	Other
ACH-000283	-0.229181	-0.0376078	10.7877	Other
ACH-002041	-0.0260709	0.316141	1.69599	Other
ACH-000987	-0.239942	-0.43701	0.847997	Other
ACH-000682	-0.129366	0.605773	2.67356	Other
ACH-000212	0.0290667	0.0256245	9.75946	Other
ACH-000096	-0.0858106	-0.507594	9.10541	UCHL1-related
ACH-001433	0.104777	0.386686	1.04264	Other
ACH-000063	-0.159979	-0.00621946	10.0129	Other
ACH-001999	-0.00310316	0.545834	0.367371	Other
ACH-000776	0.122436	0.141154	8.27817	Other
ACH-000521	-0.0327803	-0.24843	8.28147	Other
ACH-000025	-0.269078	0.0749627	9.40431	Other
ACH-000591	-0.110595	-0.426874	6.87123	Other
ACH-001716	0.416463	-0.413063	9.55823	UCHL1-related
ACH-000833	-0.0133407	-0.259265	9.32924	Other
ACH-001628	0.0395188	-0.24113	10.6856	Other
ACH-000274	0.0100592	-0.282826	2.67807	Other
ACH-001370	0.325458	0.461699	8.21781	Other
ACH-000029	-0.203322	0.387262	0.111031	Other
ACH-001849	0.103492	0.487441	0	Other
ACH-000644	0.0506598	-0.208674	1.09761	Other
ACH-001422	-0.0882077	0.771948	3.852	Other
ACH-000849	-0.251391	0.43182	3.74416	Other
ACH-000219	-0.113739	-0.271957	0.650765	Other
ACH-000150	-0.154043	0.223264	2.43563	Other
ACH-001845	-0.0264234	0.125209	0	Other
ACH-000384	-0.386421	0.326652	1.69153	Other
ACH-001053	0.431993	-0.145086	7.99294	UCHL1-related
ACH-001274	-0.202639	-0.0388654	0.378512	Other
ACH-000091	-0.0645606	0.210509	8.90406	Other
ACH-000495	-0.0757216	-0.058187	9.108	Other
ACH-000911	-0.209417	0.532325	1.25096	Other
ACH-000013	0.485112	0.163313	9.61585	Other
ACH-000777	-0.140939	0.467281	0.879706	Other
ACH-001765	0.387757	-0.348921	7.73985	UCHL1-related
ACH-000312	0.405955	-0.525492	9.60722	UCHL1-related
ACH-000085	-0.177171	0.687388	2.79286	Other
ACH-000869	0.0101331	0.279243	4.89966	Other
ACH-000489	0.294329	0.485254	3.69711	Other
ACH-000431	0.405225	-0.549999	9.86566	UCHL1-related
ACH-000152	-0.280425	-0.267938	8.22612	Other
ACH-000909	0.000421979	-0.572875	6.02724	Other
ACH-000582	0.137404	-0.385519	0.925999	Other
ACH-000460	0.198257	0.556661	8.12102	Other
ACH-000443	0.290057	0.228329	8.95733	Other
ACH-001570	0.203437	-0.245038	1.87578	Other
ACH-000986	-0.0625644	0.332145	2.7845	Other
ACH-001335	-0.114601	0.588769	4.06264	Other
ACH-000023	-0.173131	-0.260653	0.333424	Other
ACH-001277	0.276405	-0.462256	9.09574	UCHL1-related
ACH-000607	0.0102672	-0.421157	9.29002	UCHL1-related
ACH-000703	0.371708	-0.446813	9.48738	UCHL1-related
ACH-001211	0.0929701	-0.551256	0.137504	UCHL1-related
ACH-001511	0.189572	0.651162	0.201634	Other
ACH-000337	0.261081	0.334551	2.69599	Other
ACH-000281	0.0203393	0.431996	3.32337	Other
ACH-000985	-0.121765	0.0496031	1.9855	UCHL1-related
ACH-000444	0.0916923	-0.175349	2.1177	Other
ACH-000347	0.390072	-0.433484	5.26791	UCHL1-related
ACH-001399	-0.163579	0.301995	0.687061	Other
ACH-000127	-0.36232	-0.32273	1.1635	Other
ACH-001961	0.190198	0.324778	0.0285692	Other
ACH-001796	0.332641	-0.0787563	0.748461	Other
ACH-000307	-0.346189	0.563002	0.594549	Other
ACH-001030	0.265286	-0.399073	9.19303	UCHL1-related
ACH-000595	-0.24806	-0.386507	7.37173	Other
ACH-001540	0.295724	0.378843	7.05853	Other
ACH-000298	0.333909	-0.432506	8.53512	UCHL1-related
ACH-000771	0.148952	0.823113	1.31034	Other
ACH-000500	0.231013	-0.0022399	10.8405	Other
ACH-000353	-0.217293	0.629927	1.52105	Other
ACH-000350	-0.250554	0.0823382	1.23879	Other
ACH-001543	0.114803	0.717162	0	Other
ACH-000246	0.275783	0.240953	10.1496	Other
ACH-000663	0.318369	0.354592	8.59619	Other
ACH-001741	0.295037	-0.293476	8.12272	UCHL1-related
ACH-000970	-0.356109	0.152304	2.02503	Other
ACH-001333	0.122299	-0.468679	9.83553	UCHL1-related
ACH-000794	0.151042	0.767101	0.85599	Other
ACH-000039	0.0736243	-0.538941	10.4407	UCHL1-related
ACH-000471	0.0856817	-0.354573	10.4384	Other
ACH-000850	-0.149791	-0.105751	9.39388	Other
ACH-000291	0.1582	0.0433562	0.903038	Other
ACH-001453	-0.251719	0.742337	1.852	Other
ACH-001458	0.277402	0.324091	0.263034	Other
ACH-000886	-0.0319699	0.338756	6.99118	Other
ACH-000888	0.21272	0.032342	10.252	Other
ACH-000659	0.483864	-0.478914	10.3581	UCHL1-related
ACH-000030	-0.0813714	0.461523	10.2746	Other
ACH-001201	0.52926	-0.270133	8.73159	UCHL1-related
ACH-000549	-0.254454	0.664161	1.53605	Other
ACH-001212	-0.113012	-0.476439	7.59328	UCHL1-related
ACH-000555	0.107956	0.291967	8.31447	Other
ACH-000478	-0.435613	-0.0804325	0.782409	Other
ACH-000775	0.028157	-0.222909	10.3693	UCHL1-related
ACH-001109	-0.23966	-0.398764	2.14078	Other
ACH-001442	-0.368437	0.791933	0	Other
ACH-000559	0.291061	-0.573664	11.6203	UCHL1-related
ACH-000510	0.185082	-0.343722	8.96272	Other
ACH-002065	-0.281121	-0.0553636	9.50704	Other
ACH-000676	-0.114099	-0.34564	7.53939	Other
ACH-000844	0.34847	-0.4079	10.0943	UCHL1-related
ACH-000925	-0.199436	0.0858197	0.992768	UCHL1-related
ACH-000272	0.332848	0.307752	8.26899	Other
ACH-001035	0.366139	-0.400615	9.31775	Other
ACH-000513	-0.0350313	0.257203	1.24489	Other
ACH-001059	0.231177	-0.472315	9.75971	UCHL1-related
ACH-000959	-0.259988	-0.247462	1.54597	UCHL1-related
ACH-000169	-0.0532027	-0.561535	9.10889	Other
ACH-001402	-0.350848	-0.25047	1.9855	Other
ACH-000796	-0.205695	0.509607	0.545968	Other
ACH-000143	0.231444	-0.185156	8.89187	UCHL1-related
ACH-000067	-0.199454	-0.343001	9.31501	Other
ACH-000640	-0.0674264	-0.23824	0.933573	Other
ACH-001674	0.425861	-0.516071	10.1658	UCHL1-related
ACH-001698	0.456047	0.812889	0.356144	Other
ACH-002002	-0.051927	0.112783	0	Other
ACH-002011	0.262919	-0.300986	8.30282	Other
ACH-000967	-0.197935	0.132912	4.95884	Other
ACH-000469	-0.200245	-0.263959	8.46923	Other
ACH-001353	0.138929	0.646841	0.536053	Other
ACH-000097	0.0609467	-0.0564822	2.9222	UCHL1-related
ACH-000256	0.51333	0.309025	8.06037	Other
ACH-000977	0.0623441	-0.250939	1.51096	UCHL1-related
ACH-000972	-0.110133	-0.0106197	0.918386	Other
ACH-001367	0.443732	-0.546068	10.9382	UCHL1-related
ACH-000382	0.484419	-0.514538	8.36194	UCHL1-related
ACH-000579	-0.118204	-0.38037	5.92908	Other
ACH-001532	0.345622	-0.323658	10.4708	UCHL1-related
ACH-000695	0.478634	-0.370053	11.0093	UCHL1-related
ACH-001795	-0.118577	0.032888	9.73809	Other
ACH-001510	0.312398	0.711293	0.389567	Other
ACH-000502	-0.247792	0.352773	1.4489	Other
ACH-000408	0.153417	0.388252	0.887525	Other
ACH-001496	-0.0987472	0.228846	0.163499	Other
ACH-000788	-0.146783	-0.437285	1.09085	Other
ACH-001622	-0.0408652	0.235226	9.30599	Other
ACH-000466	-0.206731	0.186948	7.58451	Other
ACH-001560	-0.024702	-0.0547545	10.2624	Other
ACH-001687	0.330983	0.494227	8.8345	Other
ACH-001151	0.030441	0.357521	0	Other
ACH-000701	-0.0559929	0.500398	7	Other
ACH-000542	-0.176493	0.272545	8.47865	Other
ACH-000126	-0.041296	-0.220538	0.970854	Other
ACH-000933	-0.30235	0.41769	0.910733	Other
ACH-000015	0.403583	-0.451053	8.59727	UCHL1-related
ACH-000288	-0.169371	-0.311502	8.15178	Other
ACH-001820	0.282994	-0.13533	3.43563	UCHL1-related
ACH-001632	0.516995	0.623942	3.82273	Other
ACH-000079	-0.167364	0.206438	8.09898	Other
ACH-001031	0.383809	-0.418159	9.45311	UCHL1-related
ACH-001048	-0.139185	0.350556	8.57467	Other
ACH-000791	-0.2871	0.196756	7.37252	Other
ACH-001391	0.0270938	0.0981401	0.111031	Other
ACH-001075	-0.150914	0.658288	7.7418	Other
ACH-000175	-0.169737	-0.0758933	7.51657	Other
ACH-001356	-0.124515	-0.332861	9.39934	Other
ACH-001844	0.239858	0.399395	1.29866	Other
ACH-001346	-0.178997	0.752536	8.55005	Other
ACH-000885	0.0942622	-0.308003	2.9241	Other
ACH-000900	0.299745	-0.080863	8.25456	Other
ACH-000666	-0.0685256	-0.189436	9.90177	Other
ACH-000217	-0.299058	0.101513	0.454176	Other
ACH-000872	0.0293326	0.305726	1.97085	Other
ACH-001228	0.388065	0.357944	3.93734	UCHL1-related
ACH-000181	-0.299176	0.753522	6.07382	Other
ACH-000115	0.340241	-0.187534	5.04658	UCHL1-related
ACH-000121	-0.227696	0.180648	1.0072	Other
ACH-001711	0.277727	-0.142635	7.59253	Other
ACH-000934	-0.0323739	-0.110461	1.19535	Other
ACH-000996	0.278966	0.118903	9.53966	UCHL1-related
ACH-001529	-0.131824	0.162895	0.0703893	Other
ACH-001743	0.19854	-0.359322	6.68594	UCHL1-related
ACH-000320	-0.229736	0.0146417	1.01436	Other
ACH-000505	-0.355042	-0.293464	8.89409	Other
ACH-000781	0.241882	0.181748	10.1195	Other
ACH-000422	0.151663	-0.110889	9.81405	Other
ACH-000200	0.134086	-0.169433	9.26308	Other
ACH-000046	-0.0235595	-0.131692	1.1177	Other
ACH-000968	0.0147094	-0.157628	1.02857	Other
ACH-000830	0.348128	-0.509896	10.8075	UCHL1-related
ACH-000114	0.345402	0.4335	5.11187	Other
ACH-000036	-0.0557018	-0.183022	10.2135	Other
ACH-000973	-0.15736	-0.439339	9.1325	Other
ACH-001128	-0.135355	-0.50719	8.95983	Other
ACH-000750	-0.398382	-0.110451	0.378512	Other
ACH-001858	0.0472494	0.386866	10.5648	Other
ACH-001997	-0.228017	0.422303	0	Other
ACH-000052	0.153071	-0.578328	9.30138	UCHL1-related
ACH-000561	0.328413	0.573076	7.15977	Other

## Sheet: Suppl. Fig. S6C
Source data Supplementary Fig. S6C: GSVA score for REACTOME_DNA_REPAIR gene set from MSigDb for cells from CCLE
Sample ID	REACTOME DNA REPAIR [GSVA]	Prediction
ACH-001113	-0.142908	UCHL1-related
ACH-001289	0.121908	UCHL1-related
ACH-001339	0.107295	Other
ACH-001538	-0.2299	Other
ACH-000242	0.121105	Other
ACH-000708	-0.145261	UCHL1-related
ACH-000327	-0.288372	Other
ACH-000461	0.0295193	Other
ACH-000705	-0.014463	UCHL1-related
ACH-001794	-0.324874	Other
ACH-002023	-0.290571	Other
ACH-000528	0.0616591	Other
ACH-001655	-0.0351513	Other
ACH-000792	-0.205534	Other
ACH-001098	-0.315614	Other
ACH-000570	-0.271718	Other
ACH-000351	-0.305392	Other
ACH-000769	0.23114	UCHL1-related
ACH-000154	-0.422528	Other
ACH-000828	-0.225783	Other
ACH-000421	-0.165946	UCHL1-related
ACH-000765	-0.0244928	Other
ACH-001375	0.0726105	Other
ACH-000008	-0.154106	Other
ACH-001814	-0.0388404	Other
ACH-000800	0.195149	UCHL1-related
ACH-000606	0.0743931	Other
ACH-000317	-0.435386	Other
ACH-000123	0.358627	UCHL1-related
ACH-000723	-0.299758	Other
ACH-002066	-0.0567256	Other
ACH-001536	-0.338387	Other
ACH-000313	-0.507704	Other
ACH-002019	-0.0843018	Other
ACH-000700	0.143615	Other
ACH-000823	0.19946	Other
ACH-000678	-0.148445	Other
ACH-002029	0.172809	Other
ACH-001377	0.119932	UCHL1-related
ACH-000465	-0.071804	Other
ACH-000138	-0.434087	Other
ACH-001864	-0.337208	Other
ACH-000383	-0.0794724	Other
ACH-000917	-0.0622434	Other
ACH-000984	-0.0590461	UCHL1-related
ACH-001409	-0.0567394	Other
ACH-000117	0.0750012	Other
ACH-000999	-0.324997	UCHL1-related
ACH-000633	-0.116676	UCHL1-related
ACH-000520	-0.182297	Other
ACH-000176	-0.186068	Other
ACH-000017	-0.105166	Other
ACH-002022	-0.0350819	Other
ACH-001385	0.0569273	Other
ACH-000587	-0.0286211	Other
ACH-000785	-0.431446	Other
ACH-000554	-0.0723729	UCHL1-related
ACH-001398	-0.39275	Other
ACH-001991	0.248235	UCHL1-related
ACH-001332	-0.0224281	Other
ACH-000585	0.0798314	Other
ACH-000550	-0.072195	Other
ACH-000627	-0.326514	Other
ACH-000704	0.000803394	Other
ACH-000276	-0.233511	Other
ACH-000075	-0.0667684	Other
ACH-000818	-0.388899	Other
ACH-000625	-0.0414632	UCHL1-related
ACH-000941	0.022004	Other
ACH-000392	-0.129971	Other
ACH-000269	0.329908	Other
ACH-001670	0.268357	UCHL1-related
ACH-000856	0.0241556	UCHL1-related
ACH-000376	0.210678	Other
ACH-000685	0.0487777	Other
ACH-000729	0.146969	UCHL1-related
ACH-001034	0.455037	Other
ACH-001283	0.429253	UCHL1-related
ACH-000880	-0.0527916	UCHL1-related
ACH-000035	-0.0876624	Other
ACH-001200	-0.217315	UCHL1-related
ACH-000194	-0.330787	Other
ACH-000322	0.0456002	Other
ACH-000552	0.00418523	UCHL1-related
ACH-002508	-0.206372	Other
ACH-000222	-0.498376	Other
ACH-000260	-0.0966785	Other
ACH-001652	0.0508855	Other
ACH-000608	-0.424402	Other
ACH-000501	-0.0471963	Other
ACH-001184	0.368202	UCHL1-related
ACH-001688	-0.306012	Other
ACH-001838	-0.256199	Other
ACH-000638	-0.143573	Other
ACH-001846	-0.341048	Other
ACH-000798	-0.421099	Other
ACH-000894	0.0213709	Other
ACH-001559	0.324808	Other
ACH-000344	-0.316647	Other
ACH-000223	-0.0188046	Other
ACH-000031	-0.472854	Other
ACH-001861	-0.357464	Other
ACH-000772	-0.041893	UCHL1-related
ACH-000946	0.090257	Other
ACH-000596	-0.242287	Other
ACH-000632	0.118498	Other
ACH-000978	-0.0606764	UCHL1-related
ACH-000332	-0.346827	UCHL1-related
ACH-001841	-0.242594	Other
ACH-000179	0.0195689	UCHL1-related
ACH-000887	0.215595	Other
ACH-000368	-0.285977	Other
ACH-000240	-0.469649	Other
ACH-000578	-0.306961	Other
ACH-001611	-0.233167	Other
ACH-000135	-0.481496	Other
ACH-000998	-0.109887	UCHL1-related
ACH-000441	-0.295264	Other
ACH-000098	0.0172358	Other
ACH-001651	0.0569103	Other
ACH-001456	0.0230495	Other
ACH-001336	0.0157933	Other
ACH-000284	-0.408309	Other
ACH-000971	0.348683	UCHL1-related
ACH-001454	-0.150405	Other
ACH-000926	-0.209344	Other
ACH-000033	-0.0653874	Other
ACH-000019	0.184455	Other
ACH-000330	0.0842899	Other
ACH-000848	0.144363	UCHL1-related
ACH-000481	0.181825	UCHL1-related
ACH-001517	0.0647272	UCHL1-related
ACH-001959	0.115419	UCHL1-related
ACH-001414	-0.357636	Other
ACH-000871	6.56292e-05	UCHL1-related
ACH-001605	-0.401085	Other
ACH-001403	-0.326226	Other
ACH-000805	-0.131774	Other
ACH-001554	0.114757	Other
ACH-000847	0.371326	UCHL1-related
ACH-001207	-0.219272	Other
ACH-000832	-0.14519	Other
ACH-000428	-0.332161	Other
ACH-001382	-0.312627	Other
ACH-001302	0.121541	UCHL1-related
ACH-000690	0.0850988	Other
ACH-000858	-0.000794289	Other
ACH-001421	0.168736	UCHL1-related
ACH-000544	0.295797	Other
ACH-000725	-0.0954985	UCHL1-related
ACH-000566	-0.488801	Other
ACH-000760	0.0843057	Other
ACH-001745	0.296675	UCHL1-related
ACH-000787	-0.43959	Other
ACH-000749	0.144773	UCHL1-related
ACH-001328	0.178198	Other
ACH-000358	0.0667782	UCHL1-related
ACH-001654	0.00465965	Other
ACH-001521	0.201194	Other
ACH-000209	-0.337157	Other
ACH-000213	0.0532173	Other
ACH-001610	-0.19367	Other
ACH-001408	-0.270544	Other
ACH-000991	-0.445447	UCHL1-related
ACH-001412	-0.00298246	Other
ACH-000331	0.112257	Other
ACH-001407	0.0839546	Other
ACH-000580	-0.169864	Other
ACH-000594	-0.112498	UCHL1-related
ACH-000684	0.115262	Other
ACH-000742	-0.528218	Other
ACH-000868	-0.300884	Other
ACH-000732	-0.123228	Other
ACH-000429	-0.103698	Other
ACH-000310	0.292824	UCHL1-related
ACH-000643	-0.351317	Other
ACH-000234	-0.214995	Other
ACH-000896	-0.00906768	Other
ACH-000203	-0.200753	UCHL1-related
ACH-001607	-0.154713	Other
ACH-001441	-0.21452	Other
ACH-000186	-0.202943	Other
ACH-000677	-0.188144	UCHL1-related
ACH-000055	0.210362	UCHL1-related
ACH-000485	-0.36129	UCHL1-related
ACH-000672	-0.268747	Other
ACH-000784	-0.366563	UCHL1-related
ACH-000530	0.0726963	UCHL1-related
ACH-002024	-0.226315	UCHL1-related
ACH-001400	-0.265764	Other
ACH-001054	0.127488	UCHL1-related
ACH-000009	0.0857639	UCHL1-related
ACH-000491	0.12675	UCHL1-related
ACH-001568	-0.227506	Other
ACH-000993	-0.160306	Other
ACH-000711	-0.183036	Other
ACH-001515	-0.0802178	Other
ACH-001020	0.135958	UCHL1-related
ACH-000600	-0.00626591	Other
ACH-000354	-0.19763	Other
ACH-000012	-0.00224169	Other
ACH-000689	-0.458938	Other
ACH-000459	-0.271607	Other
ACH-001413	0.0889319	Other
ACH-000686	-0.236354	Other
ACH-000342	-0.407557	Other
ACH-000208	-0.197442	Other
ACH-000360	-0.469058	UCHL1-related
ACH-000249	-0.166633	Other
ACH-001368	0.291262	Other
ACH-000231	-0.264646	Other
ACH-000945	-0.397777	Other
ACH-000662	0.0404042	Other
ACH-002458	-0.215164	Other
ACH-001378	-0.199724	Other
ACH-001029	0.0366812	UCHL1-related
ACH-000248	-0.148483	Other
ACH-000943	0.241937	UCHL1-related
ACH-001016	-0.201361	Other
ACH-000282	0.0477849	Other
ACH-000261	0.251248	Other
ACH-000164	0.102332	Other
ACH-001793	-0.313493	Other
ACH-000262	-0.100883	Other
ACH-000722	-0.100311	Other
ACH-000857	-0.22716	Other
ACH-001619	-0.207126	Other
ACH-000184	-0.361176	Other
ACH-000329	0.084002	Other
ACH-001569	-0.258187	Other
ACH-000814	-0.13421	Other
ACH-000545	-0.348759	Other
ACH-000949	-0.438091	UCHL1-related
ACH-000560	-0.189499	UCHL1-related
ACH-000897	0.0596863	Other
ACH-001626	-0.382554	Other
ACH-000619	-0.256747	Other
ACH-001340	0.0567816	Other
ACH-000546	-0.376558	Other
ACH-002018	-0.0136305	UCHL1-related
ACH-000153	-0.0425796	Other
ACH-000526	-0.482277	Other
ACH-000116	-0.1518	UCHL1-related
ACH-001270	0.2633	Other
ACH-000324	-0.0305922	Other
ACH-001561	-0.205218	Other
ACH-000842	0.227617	Other
ACH-000898	-0.342581	Other
ACH-000517	-0.0677824	Other
ACH-001415	-0.202808	Other
ACH-000681	0.241526	Other
ACH-000484	-0.454885	Other
ACH-000108	-0.319865	Other
ACH-000808	-0.263389	Other
ACH-000997	0.356763	UCHL1-related
ACH-000866	0.118685	UCHL1-related
ACH-000819	0.187212	Other
ACH-000087	0.376	UCHL1-related
ACH-000340	-0.114393	Other
ACH-002005	-0.179723	Other
ACH-000758	-0.260274	Other
ACH-000196	-0.103729	UCHL1-related
ACH-000258	-0.00494807	UCHL1-related
ACH-000163	0.0357603	Other
ACH-001193	0.180289	UCHL1-related
ACH-000571	-0.157291	Other
ACH-000391	-0.158634	Other
ACH-000293	-0.125081	Other
ACH-000584	-0.0259659	Other
ACH-001690	-0.0970841	Other
ACH-000586	-0.0200322	UCHL1-related
ACH-001173	-0.346263	Other
ACH-001321	-0.23999	Other
ACH-001648	-0.533392	Other
ACH-000394	-0.0173302	UCHL1-related
ACH-000954	0.248988	Other
ACH-001163	0.287517	Other
ACH-000160	0.287214	Other
ACH-000989	-0.0762409	UCHL1-related
ACH-001347	-0.560381	Other
ACH-000691	-0.176291	UCHL1-related
ACH-000268	-0.101678	UCHL1-related
ACH-000119	-0.367783	Other
ACH-000379	-0.10392	Other
ACH-001341	-0.0879551	UCHL1-related
ACH-001790	-0.0544173	UCHL1-related
ACH-001673	-0.0738336	Other
ACH-000300	0.0669526	Other
ACH-000901	0.21068	Other
ACH-000816	0.184469	UCHL1-related
ACH-000511	0.073758	Other
ACH-000836	0.118951	Other
ACH-000975	-0.0284061	Other
ACH-000109	-0.29337	Other
ACH-000467	-0.303808	UCHL1-related
ACH-000712	-0.170908	UCHL1-related
ACH-000671	-0.0409722	UCHL1-related
ACH-000523	0.143859	UCHL1-related
ACH-000864	0.00377044	UCHL1-related
ACH-000726	-0.274955	Other
ACH-000136	0.00838835	UCHL1-related
ACH-002067	0.15414	Other
ACH-001461	0.00325896	Other
ACH-000890	0.363598	Other
ACH-001692	-0.32333	Other
ACH-000027	-0.306218	Other
ACH-000562	-0.0354074	Other
ACH-000748	0.0645508	Other
ACH-000834	-0.468447	Other
ACH-000565	-0.34549	Other
ACH-000449	0.164156	UCHL1-related
ACH-000399	-0.227533	UCHL1-related
ACH-000710	-0.386831	Other
ACH-000507	-0.0585175	UCHL1-related
ACH-000066	-0.213426	Other
ACH-000022	-0.0125176	UCHL1-related
ACH-001668	0.0690484	UCHL1-related
ACH-000374	-0.0414633	Other
ACH-000908	-0.222453	UCHL1-related
ACH-002003	-0.25554	Other
ACH-000574	0.0833381	Other
ACH-000148	-0.419168	Other
ACH-002461	-0.272485	Other
ACH-000646	-0.236647	Other
ACH-000314	0.0756648	Other
ACH-000040	0.102714	Other
ACH-000430	0.288325	Other
ACH-001041	-0.0387711	UCHL1-related
ACH-000370	-0.24817	Other
ACH-001630	0.0466186	Other
ACH-000437	-0.212225	Other
ACH-001392	-0.407445	Other
ACH-000503	-0.135808	Other
ACH-000328	-0.0552395	Other
ACH-000403	0.0236491	Other
ACH-000400	-0.251522	Other
ACH-000224	-0.522557	Other
ACH-000318	0.11155	Other
ACH-001430	0.30472	UCHL1-related
ACH-000928	-0.18047	Other
ACH-000893	-0.130479	Other
ACH-000799	-0.128979	Other
ACH-001623	-0.102829	Other
ACH-000736	-0.03269	Other
ACH-000876	-0.229238	Other
ACH-001232	-0.348697	Other
ACH-000235	0.0930013	Other
ACH-000381	-0.0890754	Other
ACH-001301	0.056476	UCHL1-related
ACH-000187	0.0895219	UCHL1-related
ACH-000543	-0.448544	Other
ACH-000569	-0.0714945	Other
ACH-000668	-0.201189	Other
ACH-000134	-0.468989	Other
ACH-000924	0.112416	Other
ACH-000296	-0.277345	Other
ACH-000713	-0.0838516	Other
ACH-001360	0.0804358	Other
ACH-000273	-0.101679	Other
ACH-001715	-0.0605951	Other
ACH-000639	0.22841	UCHL1-related
ACH-000590	0.00368686	Other
ACH-000553	0.0638337	Other
ACH-000094	-0.359224	Other
ACH-000361	0.0198623	Other
ACH-000719	-0.354632	Other
ACH-001396	-0.206971	Other
ACH-001848	-0.348339	Other
ACH-000339	0.323579	Other
ACH-000789	0.054937	UCHL1-related
ACH-000413	-0.514523	Other
ACH-000125	-0.438492	Other
ACH-000180	-0.36908	Other
ACH-000215	-0.109749	Other
ACH-001001	0.327619	Other
ACH-000407	-0.237215	Other
ACH-002027	-0.437355	Other
ACH-001278	-0.154733	UCHL1-related
ACH-001419	0.0299203	Other
ACH-000865	-0.0250592	UCHL1-related
ACH-001523	-0.392429	Other
ACH-000674	-0.37466	Other
ACH-000670	-0.183353	UCHL1-related
ACH-000599	0.237701	Other
ACH-000303	0.139282	Other
ACH-001551	0.178176	Other
ACH-000793	0.11678	Other
ACH-002511	-0.262877	Other
ACH-000286	-0.169634	Other
ACH-000250	-0.227465	Other
ACH-000139	0.114412	Other
ACH-001389	-0.0327889	Other
ACH-001183	0.110609	Other
ACH-000037	0.0032565	Other
ACH-000744	-0.0422865	Other
ACH-000420	-0.140126	Other
ACH-000486	0.046841	Other
ACH-000679	-0.278979	UCHL1-related
ACH-001557	-0.0515765	Other
ACH-000247	-0.142253	UCHL1-related
ACH-000947	-0.0172232	UCHL1-related
ACH-000807	-0.00112893	Other
ACH-000476	-0.100204	Other
ACH-000525	0.0172885	UCHL1-related
ACH-000853	-0.167507	UCHL1-related
ACH-000083	-0.459287	Other
ACH-000479	-0.35777	Other
ACH-000230	-0.499174	Other
ACH-001664	0.145687	UCHL1-related
ACH-000955	-0.0072492	UCHL1-related
ACH-000675	-0.0424468	Other
ACH-000199	-0.528918	Other
ACH-000538	0.15858	UCHL1-related
ACH-000010	0.123296	UCHL1-related
ACH-001649	-0.489487	Other
ACH-000155	0.214205	Other
ACH-000270	-0.250511	Other
ACH-000683	-0.0324296	UCHL1-related
ACH-002017	-0.0324993	UCHL1-related
ACH-000655	-0.00425449	Other
ACH-000145	-0.257279	Other
ACH-001495	-0.010205	Other
ACH-000188	-0.0722655	Other
ACH-000415	-0.264152	Other
ACH-001518	-0.324731	Other
ACH-000891	0.0378579	Other
ACH-001625	0.0824831	Other
ACH-000895	-0.203937	UCHL1-related
ACH-000851	0.0384576	UCHL1-related
ACH-000824	0.192514	Other
ACH-000506	0.10096	UCHL1-related
ACH-000540	-0.495017	Other
ACH-000185	-0.521404	Other
ACH-000568	-0.351757	Other
ACH-000603	-0.445565	Other
ACH-000680	-0.354424	UCHL1-related
ACH-002460	-0.340635	Other
ACH-000111	-0.265643	Other
ACH-000618	-0.214586	Other
ACH-000470	-0.322181	UCHL1-related
ACH-002039	-0.16843	Other
ACH-000118	-0.00655555	Other
ACH-000614	-0.248965	Other
ACH-001078	-0.489387	Other
ACH-000556	-0.21244	Other
ACH-001804	-0.421246	Other
ACH-001386	0.193082	UCHL1-related
ACH-001525	-0.122743	Other
ACH-000014	-0.368333	Other
ACH-000637	-0.0456597	Other
ACH-000455	-0.22125	Other
ACH-000389	-0.190836	Other
ACH-000129	0.151784	UCHL1-related
ACH-000490	0.152257	Other
ACH-000434	0.197304	Other
ACH-001086	0.322071	Other
ACH-002042	-0.114489	Other
ACH-000597	0.243004	UCHL1-related
ACH-000756	0.0993553	Other
ACH-000396	0.195386	Other
ACH-000089	-0.0831213	Other
ACH-000265	0.229772	Other
ACH-000132	-0.0427638	Other
ACH-000216	-0.125528	Other
ACH-000613	0.329509	Other
ACH-000855	-0.109017	Other
ACH-000906	0.130632	Other
ACH-000348	-0.411957	Other
ACH-000238	-0.190064	Other
ACH-000237	-0.396331	Other
ACH-000393	0.227541	Other
ACH-000623	-0.409764	Other
ACH-000359	0.163894	Other
ACH-001028	0.0561721	Other
ACH-000621	0.0235579	Other
ACH-000483	-0.123076	Other
ACH-000514	0.142935	UCHL1-related
ACH-000051	-0.150842	UCHL1-related
ACH-000043	-0.315014	Other
ACH-000936	-0.233245	Other
ACH-000716	0.0427754	Other
ACH-000988	-0.0920919	Other
ACH-000952	-0.192348	UCHL1-related
ACH-000609	0.0240281	Other
ACH-001411	-0.0890615	Other
ACH-000504	-0.345556	Other
ACH-000956	0.0817223	UCHL1-related
ACH-001712	-0.489101	Other
ACH-000652	-0.04789	Other
ACH-000414	0.145485	Other
ACH-000472	-0.145577	Other
ACH-000007	-0.210482	UCHL1-related
ACH-000446	-0.266614	Other
ACH-001850	0.198826	Other
ACH-000755	-0.193688	Other
ACH-000028	0.108293	Other
ACH-000665	-0.317926	Other
ACH-000078	-0.247126	Other
ACH-002046	0.0569792	Other
ACH-000397	0.0763498	UCHL1-related
ACH-000229	-0.52947	Other
ACH-000518	-0.388531	Other
ACH-001566	-0.111227	Other
ACH-000252	-0.195094	Other
ACH-000572	0.0185666	Other
ACH-000277	-0.0797486	Other
ACH-001239	-0.277482	Other
ACH-000803	-0.0537153	UCHL1-related
ACH-002038	-0.0904291	UCHL1-related
ACH-000537	-0.435088	Other
ACH-000724	-0.00642238	Other
ACH-000522	0.191777	Other
ACH-001549	-0.0497761	Other
ACH-000706	-0.312221	Other
ACH-000737	-0.333027	UCHL1-related
ACH-000548	-0.477719	Other
ACH-001839	-0.131059	Other
ACH-001799	-0.192145	Other
ACH-000425	-0.108974	Other
ACH-000375	0.13456	Other
ACH-000753	0.237318	Other
ACH-000275	-0.50075	Other
ACH-000735	-0.0874194	Other
ACH-001067	0.0305243	Other
ACH-001394	0.0366741	Other
ACH-000404	-0.242966	Other
ACH-000882	-0.0734803	Other
ACH-001509	-0.424379	Other
ACH-000210	-0.304536	Other
ACH-000254	-0.377638	Other
ACH-000090	-0.0955716	Other
ACH-001791	-0.31935	Other
ACH-001650	-0.0319335	Other
ACH-000605	0.00734691	UCHL1-related
ACH-000458	-0.428537	Other
ACH-000251	0.0364086	Other
ACH-001194	-0.022493	Other
ACH-001443	-0.0800868	Other
ACH-000688	0.0748412	Other
ACH-001627	-0.341769	Other
ACH-000951	-0.128226	Other
ACH-000547	-0.148146	Other
ACH-000826	0.0371202	Other
ACH-001751	0.0369727	UCHL1-related
ACH-000018	0.317328	Other
ACH-000721	0.24205	Other
ACH-000003	0.0642078	Other
ACH-000092	-0.060681	Other
ACH-000669	-0.0206349	Other
ACH-001099	-0.218966	Other
ACH-000648	0.174289	Other
ACH-000950	0.108538	UCHL1-related
ACH-000367	0.00771456	Other
ACH-000589	-0.151152	Other
ACH-001522	-0.331471	Other
ACH-000831	0.154006	Other
ACH-000424	0.411412	UCHL1-related
ACH-000409	-0.114315	Other
ACH-000616	0.0243225	Other
ACH-000628	-0.333265	Other
ACH-000232	-0.345209	Other
ACH-000820	-0.302984	UCHL1-related
ACH-001295	0.315263	UCHL1-related
ACH-001164	-0.113361	Other
ACH-000645	-0.310465	Other
ACH-000099	0.0238891	UCHL1-related
ACH-000902	0.0174972	Other
ACH-000649	-0.0158118	Other
ACH-000086	0.0565764	Other
ACH-000149	-0.100439	Other
ACH-000142	-0.0517534	Other
ACH-000227	0.107331	UCHL1-related
ACH-000264	0.151566	Other
ACH-000809	0.187839	Other
ACH-000100	0.159831	UCHL1-related
ACH-000060	0.110535	Other
ACH-000001	-0.234587	Other
ACH-000957	-0.177616	UCHL1-related
ACH-000650	0.157094	Other
ACH-001196	0.460952	UCHL1-related
ACH-000239	-0.0755002	UCHL1-related
ACH-000762	-0.188649	Other
ACH-000859	-0.0794654	Other
ACH-000990	-0.361283	Other
ACH-000410	-0.0387726	Other
ACH-000927	0.0399938	UCHL1-related
ACH-001853	-0.394749	Other
ACH-000694	-0.133557	Other
ACH-000935	-0.0164425	Other
ACH-000761	-0.19585	Other
ACH-001563	0.114402	Other
ACH-000974	-0.402292	Other
ACH-000297	0.0639008	UCHL1-related
ACH-001719	0.0831883	UCHL1-related
ACH-000243	0.0530838	Other
ACH-001418	-0.190295	Other
ACH-000843	0.30282	Other
ACH-000840	0.00313009	Other
ACH-001852	-0.199221	Other
ACH-001528	0.173556	Other
ACH-000016	-0.390437	Other
ACH-000165	-0.349649	Other
ACH-001460	-0.00409589	Other
ACH-000592	-0.258225	Other
ACH-001192	0.28841	UCHL1-related
ACH-000741	-0.370036	Other
ACH-000912	0.136744	Other
ACH-000529	-0.461532	Other
ACH-000508	0.145922	UCHL1-related
ACH-000577	-0.422045	Other
ACH-000768	0.0703565	Other
ACH-000667	-0.156004	Other
ACH-000905	-0.0511761	Other
ACH-001494	-0.471257	Other
ACH-002510	-0.316045	Other
ACH-001303	0.134899	UCHL1-related
ACH-000026	0.0557046	Other
ACH-001172	0.18002	Other
ACH-000822	-0.347019	Other
ACH-000531	-0.490944	Other
ACH-000349	-0.17809	UCHL1-related
ACH-000527	-0.419801	Other
ACH-000279	0.366037	UCHL1-related
ACH-000516	-0.260739	Other
ACH-000812	-0.386301	Other
ACH-001300	0.257612	Other
ACH-000524	-0.435643	Other
ACH-000411	0.0701403	Other
ACH-000718	-0.0866747	Other
ACH-000903	-0.0891566	Other
ACH-000433	-0.131172	Other
ACH-000499	0.337799	UCHL1-related
ACH-000278	-0.0104534	Other
ACH-000202	0.221553	UCHL1-related
ACH-001379	-0.261563	Other
ACH-000128	-0.0178907	Other
ACH-000696	0.170233	Other
ACH-000041	0.0951643	UCHL1-related
ACH-000214	-0.504093	Other
ACH-000747	0.332764	Other
ACH-001307	0.124363	Other
ACH-000341	0.0526564	UCHL1-related
ACH-001740	0.290914	UCHL1-related
ACH-000417	-0.104756	Other
ACH-000120	0.01637	Other
ACH-001694	-0.519615	Other
ACH-001542	-0.0574229	Other
ACH-002509	-0.291884	Other
ACH-000438	0.148308	Other
ACH-001366	0.288176	UCHL1-related
ACH-000532	0.10895	Other
ACH-000839	0.105533	Other
ACH-000673	0.12316	Other
ACH-001524	-0.462091	Other
ACH-000323	-0.0649447	Other
ACH-000021	0.0637031	Other
ACH-001863	-0.102805	Other
ACH-000980	0.291792	UCHL1-related
ACH-000734	-0.0556478	Other
ACH-000845	-0.119545	Other
ACH-000730	-0.00410914	Other
ACH-001334	-0.0725309	Other
ACH-000698	-0.286499	UCHL1-related
ACH-000802	-0.164522	Other
ACH-001836	-0.404335	Other
ACH-000573	-0.0048738	Other
ACH-001699	-0.103599	Other
ACH-000963	0.242622	UCHL1-related
ACH-001567	0.0994405	Other
ACH-001653	-0.323354	Other
ACH-000852	0.0547629	Other
ACH-001862	-0.361566	Other
ACH-000661	-0.150155	Other
ACH-001500	0.0033187	Other
ACH-001190	0.221965	Other
ACH-000364	0.10486	Other
ACH-000448	-0.3113	Other
ACH-000932	0.349141	UCHL1-related
ACH-000783	-0.0503599	Other
ACH-002044	0.261379	UCHL1-related
ACH-002459	-0.354229	Other
ACH-000976	-0.0278314	Other
ACH-001516	0.158676	UCHL1-related
ACH-001354	0.188005	UCHL1-related
ACH-001645	-0.246928	Other
ACH-000867	-0.0116757	Other
ACH-000304	-0.365073	Other
ACH-002069	0.0964635	Other
ACH-000931	0.0465603	UCHL1-related
ACH-001374	0.214252	UCHL1-related
ACH-000302	-0.29669	Other
ACH-000305	-0.484539	Other
ACH-000766	-0.2434	Other
ACH-000533	0.0448052	Other
ACH-000343	-0.105757	UCHL1-related
ACH-000171	-0.310108	Other
ACH-000173	-0.456817	Other
ACH-000535	-0.0219482	Other
ACH-000774	0.140783	Other
ACH-000178	-0.29885	Other
ACH-001306	-0.14562	Other
ACH-000994	0.0239581	UCHL1-related
ACH-000804	0.278096	UCHL1-related
ACH-000011	-0.199024	Other
ACH-000733	0.0308512	Other
ACH-001603	0.251765	UCHL1-related
ACH-000141	-0.0974106	Other
ACH-000810	-0.0177534	Other
ACH-001145	0.0674447	Other
ACH-000717	-0.455326	Other
ACH-000738	0.186086	Other
ACH-001843	-0.302252	Other
ACH-000780	0.11048	UCHL1-related
ACH-001548	0.313255	UCHL1-related
ACH-000759	-0.428414	Other
ACH-001555	-0.306204	Other
ACH-001369	-0.457107	Other
ACH-000969	0.09006	UCHL1-related
ACH-000873	-0.303337	Other
ACH-001275	0.212474	UCHL1-related
ACH-000921	0.100914	Other
ACH-001373	0.00531492	Other
ACH-001022	0.191015	UCHL1-related
ACH-000082	0.186163	Other
ACH-000488	0.149886	Other
ACH-000790	0.0777231	UCHL1-related
ACH-000172	-0.164381	Other
ACH-000647	-0.108075	Other
ACH-002001	-0.0818925	Other
ACH-002446	-0.0180708	Other
ACH-000201	0.00758073	Other
ACH-000435	-0.190755	Other
ACH-000965	-0.073938	Other
ACH-001550	-0.0436038	Other
ACH-002026	-0.296211	Other
ACH-000883	-0.136871	Other
ACH-000482	-0.459935	Other
ACH-000450	0.0833489	Other
ACH-000835	0.341897	Other
ACH-001802	-0.270826	Other
ACH-000629	0.432528	Other
ACH-000715	-0.141653	Other
ACH-000870	0.0956132	UCHL1-related
ACH-000910	0.266195	UCHL1-related
ACH-000779	-0.0107447	Other
ACH-001096	0.326703	UCHL1-related
ACH-000693	0.36424	Other
ACH-000811	-0.125285	Other
ACH-000423	-0.0638414	Other
ACH-000290	0.129333	UCHL1-related
ACH-001519	-0.352742	UCHL1-related
ACH-000110	-0.453336	Other
ACH-001497	-0.224653	Other
ACH-000102	-0.11349	Other
ACH-001556	0.0337763	Other
ACH-000378	0.0924848	Other
ACH-000913	0.182133	Other
ACH-000575	0.115927	Other
ACH-000634	0.0377071	Other
ACH-001322	0.218807	UCHL1-related
ACH-000767	0.0936666	UCHL1-related
ACH-001552	0.0368728	Other
ACH-000451	0.0165439	Other
ACH-000879	0.227592	Other
ACH-001842	-0.309427	Other
ACH-001032	-0.0984105	UCHL1-related
ACH-000982	0.00183484	UCHL1-related
ACH-000189	-0.388549	Other
ACH-000454	0.137742	UCHL1-related
ACH-000131	0.140984	Other
ACH-000915	0.0329717	Other
ACH-000480	-0.0311178	UCHL1-related
ACH-000161	-0.161966	Other
ACH-000395	0.132701	UCHL1-related
ACH-001459	-0.116778	Other
ACH-000916	-0.287267	Other
ACH-001609	-0.170279	Other
ACH-001960	-0.212196	UCHL1-related
ACH-001856	0.0200374	Other
ACH-000292	0.184573	UCHL1-related
ACH-000137	-0.0998119	Other
ACH-000308	-0.266202	Other
ACH-000445	-0.250513	Other
ACH-001229	-0.116747	Other
ACH-000144	-0.131607	Other
ACH-000837	0.259137	Other
ACH-000048	0.214555	UCHL1-related
ACH-000463	0.347307	Other
ACH-000881	0.193778	Other
ACH-000147	0.0298071	Other
ACH-000930	-0.249566	Other
ACH-000899	-0.299425	Other
ACH-000366	0.344647	UCHL1-related
ACH-001526	0.0028269	Other
ACH-001329	-0.314745	Other
ACH-000418	-0.355121	Other
ACH-001280	0.000224969	UCHL1-related
ACH-000861	0.0722143	Other
ACH-000692	-0.464745	Other
ACH-000107	-0.200821	Other
ACH-000133	-0.0967514	Other
ACH-000306	-0.493065	Other
ACH-001530	0.022988	Other
ACH-000651	0.452149	UCHL1-related
ACH-000563	0.218782	Other
ACH-000058	-0.412667	Other
ACH-000345	-0.110824	UCHL1-related
ACH-000316	-0.118674	Other
ACH-000884	-0.093677	Other
ACH-000289	-0.429866	Other
ACH-001451	-0.0269678	Other
ACH-000355	0.283509	UCHL1-related
ACH-000962	0.143746	Other
ACH-000473	0.0242242	Other
ACH-000192	-0.0584263	UCHL1-related
ACH-001624	-0.189195	Other
ACH-001807	-0.364313	Other
ACH-001344	-0.373541	Other
ACH-000757	0.190883	Other
ACH-000054	0.259856	Other
ACH-001318	-0.167006	Other
ACH-000601	0.156156	Other
ACH-000635	-0.215537	Other
ACH-001857	-0.305997	Other
ACH-000966	0.0808801	Other
ACH-000630	-0.435063	Other
ACH-000225	-0.013208	UCHL1-related
ACH-000657	0.398174	UCHL1-related
ACH-000624	-0.178334	Other
ACH-000699	0.027838	Other
ACH-000044	-0.181711	UCHL1-related
ACH-000740	-0.0630328	Other
ACH-000447	-0.360614	Other
ACH-001416	-0.268372	Other
ACH-000319	0.0532419	Other
ACH-000280	-0.122062	Other
ACH-001835	-0.435064	Other
ACH-000892	-0.328232	Other
ACH-000493	0.0424086	Other
ACH-000042	0.020002	Other
ACH-002045	0.167087	Other
ACH-000221	0.310461	UCHL1-related
ACH-000093	-0.177738	Other
ACH-000477	-0.254977	Other
ACH-000746	-0.0281405	UCHL1-related
ACH-000356	0.0639099	UCHL1-related
ACH-000457	-0.460104	Other
ACH-000904	-0.105663	UCHL1-related
ACH-000244	-0.423304	Other
ACH-000610	-0.133414	UCHL1-related
ACH-000255	0.202555	Other
ACH-001038	0.355914	Other
ACH-000352	0.141516	Other
ACH-002016	-0.253155	Other
ACH-000416	0.290707	Other
ACH-000752	-0.0836356	Other
ACH-000862	-0.345013	Other
ACH-000236	0.0344232	Other
ACH-000401	-0.0790739	Other
ACH-000731	-0.327292	Other
ACH-000875	-0.0132882	Other
ACH-000593	0.057539	Other
ACH-000182	-0.398775	Other
ACH-000442	-0.229396	Other
ACH-000159	-0.257239	Other
ACH-000907	-0.44768	Other
ACH-000191	-0.426221	Other
ACH-000205	-0.40915	Other
ACH-000103	-0.385735	Other
ACH-000739	-0.206819	UCHL1-related
ACH-001558	-0.255458	Other
ACH-000841	-0.0269821	Other
ACH-000615	-0.170314	Other
ACH-001608	-0.0947116	Other
ACH-000801	0.00335153	Other
ACH-000539	-0.336787	Other
ACH-000464	-0.333435	Other
ACH-000622	-0.135628	UCHL1-related
ACH-000452	-0.344164	Other
ACH-001390	0.0472903	Other
ACH-001401	0.103763	UCHL1-related
ACH-001431	0.398403	UCHL1-related
ACH-000475	-0.00950508	Other
ACH-000860	0.187085	Other
ACH-000377	-0.0549725	Other
ACH-001562	-0.315451	Other
ACH-000259	0.198302	UCHL1-related
ACH-001388	-0.441383	Other
ACH-001410	-0.192496	UCHL1-related
ACH-002025	-0.14882	Other
ACH-000720	-0.313137	Other
ACH-000095	0.378577	UCHL1-related
ACH-001345	0.132009	UCHL1-related
ACH-000558	-0.104578	Other
ACH-000177	-0.164686	UCHL1-related
ACH-000335	0.259498	Other
ACH-000940	0.110659	UCHL1-related
ACH-000631	-0.0365784	Other
ACH-000207	0.230209	Other
ACH-000764	0.000150453	Other
ACH-000709	0.0323225	Other
ACH-000846	0.294261	Other
ACH-001702	-0.194154	UCHL1-related
ACH-000333	-0.414106	Other
ACH-000929	-0.138638	Other
ACH-001395	-0.327644	Other
ACH-000948	-0.260769	Other
ACH-002015	-0.243383	Other
ACH-000617	-0.120919	Other
ACH-000311	-0.117798	Other
ACH-001210	0.109944	UCHL1-related
ACH-001834	-0.462636	Other
ACH-000390	-0.00321678	Other
ACH-000468	-0.00471893	Other
ACH-001061	0.0815081	Other
ACH-000456	-0.477473	Other
ACH-000496	-0.0884328	Other
ACH-000062	-0.398543	Other
ACH-000088	-0.396907	Other
ACH-000536	-0.0282331	Other
ACH-000071	-0.349004	Other
ACH-002004	-0.332965	Other
ACH-000878	0.123726	Other
ACH-001380	-0.165126	Other
ACH-000385	-0.305673	Other
ACH-000412	-0.243942	Other
ACH-000427	0.0230331	UCHL1-related
ACH-000939	0.252126	Other
ACH-000325	-0.307506	UCHL1-related
ACH-000515	0.113217	UCHL1-related
ACH-001033	0.069919	Other
ACH-000919	-0.11344	UCHL1-related
ACH-000863	-0.460361	Other
ACH-000581	0.0416783	UCHL1-related
ACH-001050	0.0837371	Other
ACH-001818	-0.466291	Other
ACH-001384	-0.323652	Other
ACH-000797	-0.45674	Other
ACH-000827	-0.187453	Other
ACH-000961	-0.0671796	UCHL1-related
ACH-000778	0.240612	Other
ACH-000825	-0.342257	Other
ACH-000743	-0.215007	UCHL1-related
ACH-001819	-0.0611614	UCHL1-related
ACH-001786	-0.399221	Other
ACH-000253	-0.0680078	Other
ACH-001376	-0.266482	Other
ACH-000958	-0.129056	UCHL1-related
ACH-000228	-0.373536	Other
ACH-000266	-0.377935	Other
ACH-001750	-0.0512603	Other
ACH-000174	0.187016	Other
ACH-001279	-0.148623	UCHL1-related
ACH-000620	-0.241075	Other
ACH-000813	-0.175098	Other
ACH-001513	-0.280518	Other
ACH-000257	-0.194132	UCHL1-related
ACH-000211	0.241028	Other
ACH-000283	0.105428	Other
ACH-002041	-0.354146	Other
ACH-000987	-0.00138661	Other
ACH-000682	-0.413535	Other
ACH-000212	-0.19097	Other
ACH-000096	0.33528	UCHL1-related
ACH-001433	-0.0475755	Other
ACH-000063	-0.502355	Other
ACH-001999	-0.387738	Other
ACH-000776	-0.360791	Other
ACH-000521	0.0671464	Other
ACH-000025	0.330169	Other
ACH-000591	-0.0871752	Other
ACH-001716	0.369423	UCHL1-related
ACH-000833	0.13298	Other
ACH-001628	-0.0743596	Other
ACH-000274	-0.204184	Other
ACH-001370	-0.223308	Other
ACH-000029	-0.245595	Other
ACH-001849	-0.265788	Other
ACH-000644	-0.449193	Other
ACH-001422	-0.364263	Other
ACH-000849	-0.212186	Other
ACH-000219	0.286663	Other
ACH-000150	-0.246207	Other
ACH-001845	-0.387445	Other
ACH-000384	-0.229733	Other
ACH-001053	-0.432351	UCHL1-related
ACH-001274	-0.0932328	Other
ACH-000091	-0.379652	Other
ACH-000495	-0.465269	Other
ACH-000911	0.130095	Other
ACH-000013	-0.0621938	Other
ACH-000777	-0.494916	Other
ACH-001765	0.240495	UCHL1-related
ACH-000312	0.123666	UCHL1-related
ACH-000085	0.160239	Other
ACH-000869	0.0242601	Other
ACH-000489	-0.350065	Other
ACH-000431	0.00136821	UCHL1-related
ACH-000152	-0.0192217	Other
ACH-000909	0.127343	Other
ACH-000582	0.0627249	Other
ACH-000460	-0.0756073	Other
ACH-000443	-0.40797	Other
ACH-001570	-0.00940034	Other
ACH-000986	0.119241	Other
ACH-001335	-0.0306124	Other
ACH-000023	0.37922	Other
ACH-001277	0.15145	UCHL1-related
ACH-000607	-0.00540074	UCHL1-related
ACH-000703	-0.0766387	UCHL1-related
ACH-001211	0.0402717	UCHL1-related
ACH-001511	-0.295037	Other
ACH-000337	0.266129	Other
ACH-000281	-0.0241311	Other
ACH-000985	0.0862227	UCHL1-related
ACH-000444	0.327729	Other
ACH-000347	-0.260401	UCHL1-related
ACH-001399	-0.0522442	Other
ACH-000127	-0.0322484	Other
ACH-001961	-0.376281	Other
ACH-001796	0.242772	Other
ACH-000307	0.233186	Other
ACH-001030	0.347032	UCHL1-related
ACH-000595	0.0594586	Other
ACH-001540	-0.431453	Other
ACH-000298	-0.100326	UCHL1-related
ACH-000771	-0.485128	Other
ACH-000500	0.0475387	Other
ACH-000353	0.0138724	Other
ACH-000350	-0.223553	Other
ACH-001543	-0.161447	Other
ACH-000246	-0.0126637	Other
ACH-000663	0.165101	Other
ACH-001741	0.212489	UCHL1-related
ACH-000970	-0.140107	Other
ACH-001333	0.399883	UCHL1-related
ACH-000794	-0.469238	Other
ACH-000039	0.356879	UCHL1-related
ACH-000471	-0.256611	Other
ACH-000850	-0.442928	Other
ACH-000291	-0.122176	Other
ACH-001453	0.0184419	Other
ACH-001458	-0.18584	Other
ACH-000886	-0.0638946	Other
ACH-000888	-0.187221	Other
ACH-000659	-0.122504	UCHL1-related
ACH-000030	-0.193863	Other
ACH-001201	0.077007	UCHL1-related
ACH-000549	-0.48737	Other
ACH-001212	-0.268988	UCHL1-related
ACH-000555	-0.24635	Other
ACH-000478	-0.190381	Other
ACH-000775	-0.163246	UCHL1-related
ACH-001109	-0.0956028	Other
ACH-001442	-0.182022	Other
ACH-000559	0.0914243	UCHL1-related
ACH-000510	0.323304	Other
ACH-002065	0.0212578	Other
ACH-000676	0.00337178	Other
ACH-000844	-0.181313	UCHL1-related
ACH-000925	-0.0273834	UCHL1-related
ACH-000272	-0.196769	Other
ACH-001035	0.304231	Other
ACH-000513	-0.341579	Other
ACH-001059	-0.145953	UCHL1-related
ACH-000959	-0.174759	UCHL1-related
ACH-000169	0.00865812	Other
ACH-001402	0.0963233	Other
ACH-000796	0.171928	Other
ACH-000143	0.359989	UCHL1-related
ACH-000067	-0.184062	Other
ACH-000640	-0.398252	Other
ACH-001674	0.375263	UCHL1-related
ACH-001698	0.0105562	Other
ACH-002002	-0.201342	Other
ACH-002011	-0.0424746	Other
ACH-000967	-0.281772	Other
ACH-000469	-0.423688	Other
ACH-001353	-0.507139	Other
ACH-000097	-0.251559	UCHL1-related
ACH-000256	0.0504905	Other
ACH-000977	-0.230897	UCHL1-related
ACH-000972	0.213447	Other
ACH-001367	0.127715	UCHL1-related
ACH-000382	-0.232488	UCHL1-related
ACH-000579	-0.0489911	Other
ACH-001532	-0.178504	UCHL1-related
ACH-000695	0.0223498	UCHL1-related
ACH-001795	-0.0853422	Other
ACH-001510	-0.132398	Other
ACH-000502	-0.329932	Other
ACH-000408	-0.158695	Other
ACH-001496	-0.197798	Other
ACH-000788	0.165093	Other
ACH-001622	-0.272181	Other
ACH-000466	-0.33536	Other
ACH-001560	-0.31337	Other
ACH-001687	-0.387186	Other
ACH-001151	-0.0740944	Other
ACH-000701	0.0910668	Other
ACH-000542	0.262591	Other
ACH-000126	-0.454662	Other
ACH-000933	-0.189443	Other
ACH-000015	0.105534	UCHL1-related
ACH-000288	0.242038	Other
ACH-001820	0.127979	UCHL1-related
ACH-001632	-0.0554368	Other
ACH-000079	-0.395448	Other
ACH-001031	0.102879	UCHL1-related
ACH-001048	-0.202814	Other
ACH-000791	-0.193084	Other
ACH-001391	0.0909919	Other
ACH-001075	-0.0737237	Other
ACH-000175	-0.440994	Other
ACH-001356	0.0734414	Other
ACH-001844	-0.457686	Other
ACH-001346	-0.412265	Other
ACH-000885	-0.23304	Other
ACH-000900	0.427291	Other
ACH-000666	0.0742394	Other
ACH-000217	-0.177333	Other
ACH-000872	0.0161571	Other
ACH-001228	0.169571	UCHL1-related
ACH-000181	-0.364632	Other
ACH-000115	0.0594272	UCHL1-related
ACH-000121	-0.232416	Other
ACH-001711	0.105808	Other
ACH-000934	-0.185823	Other
ACH-000996	0.0629892	UCHL1-related
ACH-001529	0.0535791	Other
ACH-001743	0.0613241	UCHL1-related
ACH-000320	-0.146649	Other
ACH-000505	0.0346042	Other
ACH-000781	0.0656459	Other
ACH-000422	-0.138045	Other
ACH-000200	-0.241439	Other
ACH-000046	-0.126429	Other
ACH-000968	-0.172022	Other
ACH-000830	0.122786	UCHL1-related
ACH-000114	-0.546684	Other
ACH-000036	-0.411716	Other
ACH-000973	0.248851	Other
ACH-001128	-0.0753871	Other
ACH-000750	0.147174	Other
ACH-001858	-0.342127	Other
ACH-001997	-0.174186	Other
ACH-000052	0.21179	UCHL1-related
ACH-000561	-0.23999	Other

[truncated: 2 more sheets: Suppl. Fig. S7A, Suppl. Fig. S7B]
