# Supplementary material for: A Novel Subgroup of UCHL1-Related Cancers Is Associated with Genomic Instability and Sensitivity to DNA-Damaging Treatment
Source: Cancers (Basel). 2023 Mar 8;15(6):1655. doi: 10.3390/cancers15061655 (PMC10099714; doi:10.3390/cancers15061655)
Supplement: Supplementary file 1 [file cancers-15-01655-s001.zip › Supplementary tables.xlsx]

## Sheet: Suppl. Table S1
Supplemental Table S1: Summary of data resources, online tools, software and algorithms
(A) Data resources and online tools
Description	Data types	Source	Link	Reference	Accession Date
Cancer Cell Line Encyclopedia (CCLE)	Cell line information	depmap portal	https://depmap.org/portal/	RRID:SCR_017655	2021-12-27
	Radiation Response			PMID: 27109210	2021-08-23
	Gene expression 20Q4	depmap portal	https://depmap.org/portal/	RRID:SCR_017655	2021-05-07
	PRISM 19Q4	depmap portal	https://depmap.org/portal/	RRID:SCR_017655	2021-05-07
	GDSC 1&2	depmap portal	https://depmap.org/portal/	RRID:SCR_017655	2021-04-29
GSE117973	Clinical data	GEO: GSE117973	https://www.ncbi.nlm.nih.gov/geo/query/acc.cgi	PMID: 31135957, PMID: 32930393	2020-10-11
	Gene expression	GEO: GSE117973	https://www.ncbi.nlm.nih.gov/geo/query/acc.cgi		2016-11-21
	Immunhistochemical staining	This study
Munich cohort	Clinical data			PMID: 34965946	2022-03-07
	Gene expression	GEO: GSE173855	https://www.ncbi.nlm.nih.gov/geo/query/acc.cgi		2022-03-07
Molecular Signatures Database (MSigDB)	Gene sets (version 7.2)		https://www.gsea-msigdb.org/gsea/msigdb/index.jsp	PMID: 26771021	2020-10-07
Protein Atlas	anti-UCHL1 antibody IHC (ID: 1435, 2114, 662, 2841)	Human Protein Atlas	https://www.proteinatlas.org/	RRID:SCR_006710	2022-08-25
TCGA-HNSC	Clinical data	cBioPortal	https://www.cbioportal.org/	PMID: 23550210, PMID: 22588877, RRID:SCR_014555	2020-08-17
		GDC portal	https://gdc.cancer.gov/about-data/publications/pancanatlas	PMID: 24071849	2020-08-17
	Gene expression	GDC portal	https://www.cbioportal.org/	PMID: 23550210, PMID: 22588877, RRID:SCR_014555	2019-02-19
	Mutation data	cBioPortal	https://www.cbioportal.org/	PMID: 23550210, PMID: 22588877, RRID:SCR_014555	2020-09-01
		GDC portal	https://gdc.cancer.gov/about-data/publications/pancanatlas	PMID: 24071849	2020-09-01
	Copy number data	cBioPortal	https://www.cbioportal.org/	PMID: 23550210, PMID: 22588877, RRID:SCR_014555	2020-08-17
		GDC portal	https://gdc.cancer.gov/about-data/publications/pancanatlas	PMID: 24071849	2020-08-25
	Methylation data	GDC portal	https://gdc.cancer.gov/about-data/publications/pancanatlas	PMID: 24071849	2020-08-25
	UCHL1 coexpressed genes	cBioPortal	https://www.cbioportal.org/	PMID: 23550210, PMID: 22588877, RRID:SCR_014555	2020-08-17
	Methylation data UCHL1 (450k)		http://maplab.imppc.org/wanderer/	PMID: 26113876	2020-10-21
TCGA PanCancer	Clinical data	cBioPortal	https://www.cbioportal.org/	PMID: 23550210, PMID: 22588877, RRID:SCR_014555	2020-08-25
		GDC portal	https://gdc.cancer.gov/about-data/publications/pancanatlas	PMID: 24071849	2020-08-25
	Gene expression	GDC portal	https://gdc.cancer.gov/about-data/publications/pancanatlas	PMID: 24071849	2020-08-25
	Mutation data	cBioPortal	https://www.cbioportal.org/	PMID: 23550210, PMID: 22588877, RRID:SCR_014555	2020-08-25
		GDC portal	https://gdc.cancer.gov/about-data/publications/pancanatlas	PMID: 24071849	2020-09-01
	Copy number data	cBioPortal	https://www.cbioportal.org/	PMID: 23550210, PMID: 22588877, RRID:SCR_014555	2020-08-25
		GDC portal	https://gdc.cancer.gov/about-data/publications/pancanatlas	PMID: 24071849	2020-08-25
	Methylation data	GDC portal	https://gdc.cancer.gov/about-data/publications/pancanatlas	PMID: 24071849	2020-08-25
(B) Software and algorithms
Name	Version	Link	Reference
annotate	1.62.0	https://cran.r-project.org/	RRID:SCR_003005
AnnotationDbi	1.48.0	https://bioconductor.org/	RRID:SCR_006442
Biobase	2.46.0	https://cran.r-project.org/	RRID:SCR_003005
BiocGenerics	0.32.0	https://cran.r-project.org/	RRID:SCR_003005
broom	0.7.11	https://cran.r-project.org/	RRID:SCR_003005
caret	6.0-90	https://cran.r-project.org/	RRID:SCR_003005
CePa	0.7.0	https://cran.r-project.org/	RRID:SCR_003005
circlize	0.4.13	https://cran.r-project.org/	RRID:SCR_003005
clusterProfiler	3.12.0	https://cran.r-project.org/	PMID: 22455463
ComplexHeatmap	2.0.0	https://cran.r-project.org/	PMID: 27207943, RRID:SCR_017270
CoNVaQ	0.1.3	https://cran.r-project.org/	PMID: 29776329
dplyr	1.0.7	https://cran.r-project.org/	RRID:SCR_003005
edgeR	3.26.8	https://cran.r-project.org/	PMID: 19910308
enrichplot	1.4.0	https://cran.r-project.org/	RRID:SCR_003005
eulerr	6.1.1	https://cran.r-project.org/	RRID:SCR_003005
forcats	0.5.1	https://cran.r-project.org/	RRID:SCR_003005
futile.logger	1.4.3	https://cran.r-project.org/	RRID:SCR_003005
GenVisR	1.16.1	https://cran.r-project.org/	RRID:SCR_003005
ggbreak	0.0.8	https://cran.r-project.org/	RRID:SCR_003005
ggplot2	3.3.5	https://cran.r-project.org/	RRID:SCR_003005
ggpubr	0.4.0	https://cran.r-project.org/	RRID:SCR_003005
ggrepel	0.9.1	https://cran.r-project.org/	RRID:SCR_003005
gmodels	2.18.1	https://cran.r-project.org/	RRID:SCR_003005
graph	1.62.0	https://cran.r-project.org/	RRID:SCR_003005
gridExtra	2.3	https://cran.r-project.org/	RRID:SCR_003005
GSEABase	1.46.0	https://cran.r-project.org/	PMID: 16199517
GSVA	1.32.0	https://cran.r-project.org/	PMID: 23323831
IGV	2.8.0	http://www.broadinstitute.org/igv	PMID: 22517427
illuminaHumanv4.db	1.26.0	https://cran.r-project.org/	RRID:SCR_003005
IRanges	2.20.2	https://cran.r-project.org/	RRID:SCR_003005
jstable	1.0.7	https://cran.r-project.org/	RRID:SCR_003005
lattice	0.20-45	https://cran.r-project.org/	RRID:SCR_003005
limma	3.40.6	https://cran.r-project.org/	PMID: 25605792
maftools	2.0.16	https://cran.r-project.org/	RRID:SCR_003005
Matrix	1.3-4	https://cran.r-project.org/	RRID:SCR_003005
MVisAGe	0.2.1	https://cran.r-project.org/	RRID:SCR_003005
org.Hs.eg.db	3.8.2	https://bioconductor.org/	RRID:SCR_006442
prodlim	2019.11.13	https://cran.r-project.org/	RRID:SCR_003005
purrr	0.3.4	https://cran.r-project.org/	RRID:SCR_003005
QuPath	0.2.3	https://qupath.github.io/	PMID: 29203879
R Version	3.6.1	https://www.r-project.org/	RRID:SCR_001905
RColorBrewer	1.1-2	https://cran.r-project.org/	RRID:SCR_003005
readr	2.1.1	https://cran.r-project.org/	RRID:SCR_003005
readxl	1.3.1	https://cran.r-project.org/	RRID:SCR_003005
rlist	0.4.6.2	https://cran.r-project.org/	RRID:SCR_003005
RStudio	1.2.1335	https://www.rstudio.com/	RRID:SCR_000432
S4Vectors	0.24.4	https://cran.r-project.org/	RRID:SCR_003005
stringr	1.4.0	https://cran.r-project.org/	RRID:SCR_003005
survey	4.1-1	https://cran.r-project.org/	RRID:SCR_003005
survival	3.2-13	https://cran.r-project.org/	RRID:SCR_003005
survivalAnalysis	0.2.0	https://cran.r-project.org/	RRID:SCR_003005
survminer	0.4.9	https://cran.r-project.org/	RRID:SCR_003005
tblhelpr	0.2.0	https://cran.r-project.org/	RRID:SCR_003005
tibble	3.1.6	https://cran.r-project.org/	RRID:SCR_003005
tidyr	1.1.4	https://cran.r-project.org/	RRID:SCR_003005
tidyverse	1.3.1	https://cran.r-project.org/	RRID:SCR_003005
vcd	1.4-9	https://cran.r-project.org/	RRID:SCR_003006
VennDiagram	1.7.1	https://cran.r-project.org/	RRID:SCR_003007
xgboost	1.5.0.2	https://cran.r-project.org/	RRID:SCR_003008
XML	3.99-0.3	https://cran.r-project.org/	RRID:SCR_003009

## Sheet: Suppl. Table S2
Supplemental Table S2: Summary of primers and antibodies
(A) Primers
Gene ID	Gene Symbol	For	Rev
60	ACTB	AGG ATT CCT ATG TGG GCG AC	TCA CGA TGC CAG TGG TAC GG
4001	LMNB1	GCT GCT CCT CAA CTA TGC TAA GAA	TTT GAC GCC CAG AAT CCA C
6908	TBP	GAG CTG TGA TGT GAA GTT TCC	TCT GGG TTT GAT CAT TCT GTA G
7345	UCHL1	GAC GAA TGC CTT TTC CGG TG	GAC TTC TCC TTG CTC ACG CT
(B) Antibodies
Antibody	Cat. No.	Company	Dilution
anti-UCHL1 antibody	HPA005993	Sigma-Aldrich, Germany	1:500 (WB), 1:5000 (IHC)
Anti-β-Actin antibody	A5441	Sigma-Aldrich, Germany	1:10000 (WB)

## Sheet: Suppl. Table S3
Supplemental Table S3: Final parameters for the xgbTree model to predict UCHL1-related and other tumors.
Final model parameters:	nrounds	max_depth	eta	gamma	colsample_bytree	min_child_weight	subsample	Additional Sampling
	725	7	0.1	0.05	0.6	2	0.6	SMOTE
Gene set	Factor
REACTOME_OVARIAN_TUMOR_DOMAIN_PROTEASES	0.0806866
WP_NOVEL_INTRACELLULAR_COMPONENTS_OF_RIGILIKE_RECEPTOR_RLR_PATHWAY	0.0568438
REACTOME_PYRIMIDINE_CATABOLISM	0.044641
PID_P38_MKK3_6PATHWAY	0.0380411
BIOCARTA_IFNG_PATHWAY	0.0374981
REACTOME_MUSCARINIC_ACETYLCHOLINE_RECEPTORS	0.0356997
BIOCARTA_UCALPAIN_PATHWAY	0.0341157
REACTOME_RHO_GTPASES_ACTIVATE_KTN1	0.0256746
REACTOME_TOLL_LIKE_RECEPTOR_CASCADES	0.0242759
BIOCARTA_BCR_PATHWAY	0.0214336
REACTOME_ADRENOCEPTORS	0.0203377
REACTOME_ORGANIC_ANION_TRANSPORTERS	0.0190508
REACTOME_ABACAVIR_TRANSPORT_AND_METABOLISM	0.0152394
REACTOME_TRAF6_MEDIATED_NF_KB_ACTIVATION	0.0142761
REACTOME_TRAFFICKING_AND_PROCESSING_OF_ENDOSOMAL_TLR	0.0142102
REACTOME_THE_ROLE_OF_NEF_IN_HIV_1_REPLICATION_AND_DISEASE_PATHOGENESIS	0.0136821
KEGG_MATURITY_ONSET_DIABETES_OF_THE_YOUNG	0.0132825
REACTOME_FGFRL1_MODULATION_OF_FGFR1_SIGNALING	0.0127915
WP_SECRETION_OF_HYDROCHLORIC_ACID_IN_PARIETAL_CELLS	0.011383
REACTOME_CASPASE_ACTIVATION_VIA_DEATH_RECEPTORS_IN_THE_PRESENCE_OF_LIGAND	0.0110738
WP_METABOLISM_OF_ALPHALINOLENIC_ACID	0.00948938
KEGG_NITROGEN_METABOLISM	0.00895847
REACTOME_DEATH_RECEPTOR_SIGNALLING	0.00871709
BIOCARTA_NGF_PATHWAY	0.00784455
KEGG_ALANINE_ASPARTATE_AND_GLUTAMATE_METABOLISM	0.00776348
BIOCARTA_NPP1_PATHWAY	0.00774474
REACTOME_ACROSOME_REACTION_AND_SPERM_OOCYTE_MEMBRANE_BINDING	0.00769164
REACTOME_SUPPRESSION_OF_PHAGOSOMAL_MATURATION	0.00703859
REACTOME_NICOTINATE_METABOLISM	0.00691125
WP_DOPAMINERGIC_NEUROGENESIS	0.00682874
WP_ESTROGEN_METABOLISM	0.00676537
REACTOME_GLUTAMATE_AND_GLUTAMINE_METABOLISM	0.00664125
WP_UNFOLDED_PROTEIN_RESPONSE	0.00663286
REACTOME_NEGATIVE_REGULATION_OF_FGFR2_SIGNALING	0.00634248
REACTOME_RAP1_SIGNALLING	0.00631968
REACTOME_CHYLOMICRON_CLEARANCE	0.00610216
BIOCARTA_P38MAPK_PATHWAY	0.00605439
WP_TRANSSULFURATION_PATHWAY	0.00597591
BIOCARTA_ECM_PATHWAY	0.00592198
WP_VITAMIN_DSENSITIVE_CALCIUM_SIGNALING_IN_DEPRESSION	0.00590985
WP_COPPER_HOMEOSTASIS	0.00580011
BIOCARTA_BIOPEPTIDES_PATHWAY	0.00569939
WP_IRINOTECAN_PATHWAY	0.00569609
REACTOME_ADENYLATE_CYCLASE_INHIBITORY_PATHWAY	0.00532095
REACTOME_NRAGE_SIGNALS_DEATH_THROUGH_JNK	0.00531317
WP_SUPRESSION_OF_HMGB1_MEDIATED_INFLAMMATION_BY_THBD	0.00475758
WP_NEPHROTIC_SYNDROME	0.00468719
WP_THYROXINE_THYROID_HORMONE_PRODUCTION	0.00467061
BIOCARTA_CERAMIDE_PATHWAY	0.00463946
HOXA9_DN.V1_UP	0.00459034
WP_ZINC_HOMEOSTASIS	0.00450579
BIOCARTA_EGF_PATHWAY	0.00449387
REACTOME_BIOLOGICAL_OXIDATIONS	0.00435512
KEGG_PRIMARY_BILE_ACID_BIOSYNTHESIS	0.00421646
REACTOME_NEGATIVE_REGULATION_OF_FGFR1_SIGNALING	0.00416825
BIOCARTA_RAS_PATHWAY	0.00406107
BIOCARTA_FLUMAZENIL_PATHWAY	0.00405542
REACTOME_REGULATION_OF_GENE_EXPRESSION_IN_BETA_CELLS	0.00403153
WP_MACROPHAGE_MARKERS	0.00383624
KEGG_PENTOSE_AND_GLUCURONATE_INTERCONVERSIONS	0.00372962
ESC_J1_UP_EARLY.V1_UP	0.0036356
REACTOME_P75NTR_REGULATES_AXONOGENESIS	0.00356897
REACTOME_NRCAM_INTERACTIONS	0.00347469
REACTOME_TFAP2_AP_2_FAMILY_REGULATES_TRANSCRIPTION_OF_GROWTH_FACTORS_AND_THEIR_RECEPTORS	0.00336029
REACTOME_HYALURONAN_BIOSYNTHESIS_AND_EXPORT	0.0033428
REACTOME_PI_3K_CASCADE_FGFR3	0.00323955
BIOCARTA_FREE_PATHWAY	0.00323574
REACTOME_NEURONAL_SYSTEM	0.00315974
REACTOME_GLUCURONIDATION	0.00313984
REACTOME_INFLAMMASOMES	0.00313753
REACTOME_FORMATION_OF_SENESCENCE_ASSOCIATED_HETEROCHROMATIN_FOCI_SAHF_	0.0028334
WP_PREGNANE_X_RECEPTOR_PATHWAY	0.00276918
WP_IL5_SIGNALING_PATHWAY	0.00270615
REACTOME_IRF3_MEDIATED_INDUCTION_OF_TYPE_I_IFN	0.00268576
REACTOME_VLDL_ASSEMBLY	0.00267705
REACTOME_REGULATION_OF_GENE_EXPRESSION_IN_EARLY_PANCREATIC_PRECURSOR_CELLS	0.00260516
REACTOME_ACTIVATION_OF_NOXA_AND_TRANSLOCATION_TO_MITOCHONDRIA	0.00252919
REACTOME_FACTORS_INVOLVED_IN_MEGAKARYOCYTE_DEVELOPMENT_AND_PLATELET_PRODUCTION	0.00250752
WP_CLASSICAL_PATHWAY_OF_STEROIDOGENESIS_INCLUDING_DISEASES	0.00249253
WP_PENTOSE_PHOSPHATE_METABOLISM	0.00248802
REACTOME_TRAF6_MEDIATED_IRF7_ACTIVATION	0.0024401
REACTOME_ATF6_ATF6_ALPHA_ACTIVATES_CHAPERONES	0.00239611
REACTOME_RIPK1_MEDIATED_REGULATED_NECROSIS	0.00234582
E2F3_UP.V1_UP	0.00232057
REACTOME_PURINE_SALVAGE	0.00231491
REACTOME_TRANSCRIPTIONAL_REGULATION_OF_PLURIPOTENT_STEM_CELLS	0.00220097
PRC2_SUZ12_UP.V1_UP	0.00216379
REACTOME_CHYLOMICRON_ASSEMBLY	0.00215503
WP_CYTOSOLIC_DNASENSING_PATHWAY	0.00210781
REACTOME_UPTAKE_AND_FUNCTION_OF_DIPHTHERIA_TOXIN	0.00208479
REACTOME_EICOSANOID_LIGAND_BINDING_RECEPTORS	0.00202818
REACTOME_AMINO_ACID_TRANSPORT_ACROSS_THE_PLASMA_MEMBRANE	0.0019878
REACTOME_RUNX1_INTERACTS_WITH_CO_FACTORS_WHOSE_PRECISE_EFFECT_ON_RUNX1_TARGETS_IS_NOT_KNOWN	0.00189023
WP_MAMMARY_GLAND_DEVELOPMENT_PATHWAY_EMBRYONIC_DEVELOPMENT_STAGE_1_OF_4	0.00188615
BIOCARTA_MCALPAIN_PATHWAY	0.00185433
KEGG_SELENOAMINO_ACID_METABOLISM	0.00184366
REACTOME_TNF_SIGNALING	0.00178799
KEGG_GLYCOSPHINGOLIPID_BIOSYNTHESIS_GANGLIO_SERIES	0.00177878
REACTOME_NEF_MEDIATED_CD8_DOWN_REGULATION	0.00175556
WP_MIR517_RELATIONSHIP_WITH_ARCN1_AND_USP1	0.00172768
PID_IL8_CXCR1_PATHWAY	0.00169642
WP_TYPE_III_INTERFERON_SIGNALING	0.00166753
KEGG_REGULATION_OF_AUTOPHAGY	0.00165876
REACTOME_ORGANIC_CATION_ANION_ZWITTERION_TRANSPORT	0.00164447
REACTOME_TERMINATION_OF_O_GLYCAN_BIOSYNTHESIS	0.00162688
REACTOME_GLI_PROTEINS_BIND_PROMOTERS_OF_HH_RESPONSIVE_GENES_TO_PROMOTE_TRANSCRIPTION	0.00156721
REACTOME_ATF6_ATF6_ALPHA_ACTIVATES_CHAPERONE_GENES	0.00143819
WP_HOSTPATHOGEN_INTERACTION_OF_HUMAN_CORONA_VIRUSES_AUTOPHAGY	0.00140964
REACTOME_EPHB_MEDIATED_FORWARD_SIGNALING	0.00140581
HALLMARK_INTERFERON_ALPHA_RESPONSE	0.0013583
PID_HDAC_CLASSII_PATHWAY	0.00134798
WP_CODEINE_AND_MORPHINE_METABOLISM	0.00133679
REACTOME_FOXO_MEDIATED_TRANSCRIPTION_OF_CELL_DEATH_GENES	0.00131636
REACTOME_NA_CL_DEPENDENT_NEUROTRANSMITTER_TRANSPORTERS	0.00131527
BIOCARTA_KREB_PATHWAY	0.00127273
BIOCARTA_SALMONELLA_PATHWAY	0.00127147
WP_ETHANOL_METABOLISM_RESULTING_IN_PRODUCTION_OF_ROS_BY_CYP2E1	0.0012667
WP_INFLAMMATORY_RESPONSE_PATHWAY	0.00123284
WP_NANOPARTICLE_TRIGGERED_AUTOPHAGIC_CELL_DEATH	0.00121639
RB_DN.V1_DN	0.0012155
WP_UREA_CYCLE_AND_ASSOCIATED_PATHWAYS	0.00121173
BIOCARTA_INTEGRIN_PATHWAY	0.00121086
REACTOME_FGFR2B_LIGAND_BINDING_AND_ACTIVATION	0.00119915
REACTOME_TRANSCRIPTIONAL_ACTIVATION_OF_MITOCHONDRIAL_BIOGENESIS	0.00119188
REACTOME_TRIF_MEDIATED_PROGRAMMED_CELL_DEATH	0.00118043
WP_CALCIUM_REGULATION_IN_THE_CARDIAC_CELL	0.00116628
WP_DNA_IRDAMAGE_AND_CELLULAR_RESPONSE_VIA_ATR	0.00113728
REACTOME_GALACTOSE_CATABOLISM	0.0011295
WP_IL2_SIGNALING_PATHWAY	0.00112777
REACTOME_INTERLEUKIN_20_FAMILY_SIGNALING	0.00111464
WP_PATHOGENIC_ESCHERICHIA_COLI_INFECTION	0.00110954
REACTOME_LIPID_PARTICLE_ORGANIZATION	0.00109183
WP_DNA_DAMAGE_RESPONSE	0.00108917
REACTOME_NICOTINAMIDE_SALVAGING	0.00105975
WP_GLUTATHIONE_METABOLISM	0.00102592
REACTOME_HYALURONAN_UPTAKE_AND_DEGRADATION	0.001022
REACTOME_SIGNALING_BY_MST1	0.00100945
REACTOME_REGULATION_OF_BETA_CELL_DEVELOPMENT	0.00100024
BIOCARTA_EPO_PATHWAY	0.000969642
REACTOME_SIGNALING_BY_MODERATE_KINASE_ACTIVITY_BRAF_MUTANTS	0.000951596
REACTOME_ORGANIC_ANION_TRANSPORT	0.00095055
HALLMARK_APICAL_SURFACE	0.00094549
BIOCARTA_CFTR_PATHWAY	0.000884438
KEGG_ASCORBATE_AND_ALDARATE_METABOLISM	0.000882056
REACTOME_ACTIVATED_NTRK2_SIGNALS_THROUGH_PI3K	0.000875032
WP_HFE_EFFECT_ON_HEPCIDIN_PRODUCTION	0.000872718
REACTOME_TELOMERE_EXTENSION_BY_TELOMERASE	0.000871117
HALLMARK_INTERFERON_GAMMA_RESPONSE	0.000862234
WP_DUAL_HIJACK_MODEL_OF_VIF_IN_HIV_INFECTION	0.00086053
REACTOME_REGULATION_OF_GLYCOLYSIS_BY_FRUCTOSE_2_6_BISPHOSPHATE_METABOLISM	0.000860367
WP_GAMMAGLUTAMYL_CYCLE_FOR_THE_BIOSYNTHESIS_AND_DEGRADATION_OF_GLUTATHIONE_INCLUDING_DISEASES	0.00082773
WP_DIFFERENTIATION_PATHWAY	0.0008263
HALLMARK_SPERMATOGENESIS	0.000804638
WP_VITAMIN_D_METABOLISM	0.00080356
PID_CD8_TCR_DOWNSTREAM_PATHWAY	0.000797913
REACTOME_TACHYKININ_RECEPTORS_BIND_TACHYKININS	0.000794326
REACTOME_PRESYNAPTIC_DEPOLARIZATION_AND_CALCIUM_CHANNEL_OPENING	0.000771132
WP_ULTRACONSERVED_REGION_339_MODULATION_OF_TUMOR_SUPPRESSOR_MICRORNAS_IN_CANCER	0.000764522
BIOCARTA_RACC_PATHWAY	0.00075951
REACTOME_HUR_ELAVL1_BINDS_AND_STABILIZES_MRNA	0.00075526
REACTOME_CHOLINE_CATABOLISM	0.000737924
SRC_UP.V1_UP	0.000731278
REACTOME_ADRENALINE_NORADRENALINE_INHIBITS_INSULIN_SECRETION	0.000717369
PID_LYSOPHOSPHOLIPID_PATHWAY	0.000714932
BIOCARTA_P35ALZHEIMERS_PATHWAY	0.000706477
REACTOME_GAP_FILLING_DNA_REPAIR_SYNTHESIS_AND_LIGATION_IN_GG_NER	0.000702609
REACTOME_RNA_POLYMERASE_III_TRANSCRIPTION	0.00070116
BIOCARTA_WNT_LRP6_PATHWAY	0.00069192
REACTOME_PROGRAMMED_CELL_DEATH	0.000689027
BIOCARTA_NUCLEARRS_PATHWAY	0.000682013
REACTOME_SIGNALING_BY_EGFR	0.000662357
BIOCARTA_NKT_PATHWAY	0.000651572
WP_MIRNAS_INVOLVEMENT_IN_THE_IMMUNE_RESPONSE_IN_SEPSIS	0.000651054
REACTOME_RAS_SIGNALING_DOWNSTREAM_OF_NF1_LOSS_OF_FUNCTION_VARIANTS	0.000650406
PID_AR_NONGENOMIC_PATHWAY	0.000642086
KEGG_GLYCOSAMINOGLYCAN_BIOSYNTHESIS_HEPARAN_SULFATE	0.00063723
REACTOME_RETROGRADE_NEUROTROPHIN_SIGNALLING	0.000601496
REACTOME_PLATELET_ADHESION_TO_EXPOSED_COLLAGEN	0.000578874
ATF2_S_UP.V1_DN	0.000576591
WP_PHOTODYNAMIC_THERAPYINDUCED_UNFOLDED_PROTEIN_RESPONSE	0.000574428
WP_NUCLEAR_RECEPTORS_IN_LIPID_METABOLISM_AND_TOXICITY	0.000565445
KEGG_TAURINE_AND_HYPOTAURINE_METABOLISM	0.000565285
BIOCARTA_PGC1A_PATHWAY	0.000563895
REACTOME_NEGATIVE_REGULATORS_OF_DDX58_IFIH1_SIGNALING	0.000563641
WP_TCELL_RECEPTOR_AND_COSTIMULATORY_SIGNALING	0.000556738
WP_BENZENE_METABOLISM	0.000553467
REACTOME_VITAMIN_C_ASCORBATE_METABOLISM	0.000548228
REACTOME_TAK1_ACTIVATES_NFKB_BY_PHOSPHORYLATION_AND_ACTIVATION_OF_IKKS_COMPLEX	0.000546638
BRCA1_DN.V1_DN	0.00053372
PID_LPA4_PATHWAY	0.00052593
REACTOME_DEFECTIVE_GALNT3_CAUSES_FAMILIAL_HYPERPHOSPHATEMIC_TUMORAL_CALCINOSIS_HFTC_	0.000523863
REACTOME_TNFR1_INDUCED_NFKAPPAB_SIGNALING_PATHWAY	0.000510748
WP_METABOLIC_PATHWAY_OF_LDL_HDL_AND_TG_INCLUDING_DISEASES	0.000510209
WP_ENDOPLASMIC_RETICULUM_STRESS_RESPONSE_IN_CORONAVIRUS_INFECTION	0.000504526
REACTOME_GABA_B_RECEPTOR_ACTIVATION	0.000500925
KRAS.BREAST_UP.V1_UP	0.000495865
REACTOME_SIGNALING_BY_NODAL	0.000494111
BIOCARTA_CYTOKINE_PATHWAY	0.000488076
KEGG_SNARE_INTERACTIONS_IN_VESICULAR_TRANSPORT	0.000485248
WP_SIMPLIFIED_DEPICTION_OF_MYD88_DISTINCT_INPUTOUTPUT_PATHWAY	0.000463201
CAHOY_OLIGODENDROCUTIC	0.000461477
REACTOME_PROCESSIVE_SYNTHESIS_ON_THE_LAGGING_STRAND	0.000460284
REACTOME_TRANSPORT_OF_ORGANIC_ANIONS	0.000456702
REACTOME_ASPARTATE_AND_ASPARAGINE_METABOLISM	0.000441064
WP_DEVELOPMENT_AND_HETEROGENEITY_OF_THE_ILC_FAMILY	0.000435936
KEGG_RETINOL_METABOLISM	0.000424448
WP_IL10_ANTIINFLAMMATORY_SIGNALING_PATHWAY	0.000421835
REACTOME_DIGESTION	0.000413118
KEGG_LYSOSOME	0.000412137
REACTOME_FRS_MEDIATED_FGFR4_SIGNALING	0.000411848
REACTOME_TRIGLYCERIDE_BIOSYNTHESIS	0.000408107
REACTOME_HDR_THROUGH_HOMOLOGOUS_RECOMBINATION_HRR_	0.000398629
KEGG_GLYCOSPHINGOLIPID_BIOSYNTHESIS_GLOBO_SERIES	0.000396613
REACTOME_ENERGY_DEPENDENT_REGULATION_OF_MTOR_BY_LKB1_AMPK	0.000383306
WP_ADIPOGENESIS	0.000379967
WP_DNA_REPLICATION	0.000378836
REACTOME_IONOTROPIC_ACTIVITY_OF_KAINATE_RECEPTORS	0.000376654
REACTOME_PEPTIDE_HORMONE_BIOSYNTHESIS	0.000375305
KEGG_GLYCEROLIPID_METABOLISM	0.000374567
REACTOME_REELIN_SIGNALLING_PATHWAY	0.000367525
BIOCARTA_TFF_PATHWAY	0.000362028
PID_INTEGRIN_A9B1_PATHWAY	0.00034938
ATF2_UP.V1_UP	0.000347111
WP_GENES_INVOLVED_IN_MALE_INFERTILITY	0.000346524
WP_GENES_TARGETED_BY_MIRNAS_IN_ADIPOCYTES	0.000346181
REACTOME_THYROXINE_BIOSYNTHESIS	0.000342677
REACTOME_SUMOYLATION_OF_DNA_METHYLATION_PROTEINS	0.000342548
REACTOME_BIOSYNTHESIS_OF_EPA_DERIVED_SPMS	0.000336104
WP_MTHFR_DEFICIENCY	0.000336069
REACTOME_TANDEM_PORE_DOMAIN_POTASSIUM_CHANNELS	0.000331403
REACTOME_WNT5A_DEPENDENT_INTERNALIZATION_OF_FZD2_FZD5_AND_ROR2	0.000326944
REACTOME_INLB_MEDIATED_ENTRY_OF_LISTERIA_MONOCYTOGENES_INTO_HOST_CELL	0.000326431
BIOCARTA_ACETAMINOPHEN_PATHWAY	0.000325597
REACTOME_SEROTONIN_RECEPTORS	0.000310346
WP_MATRIX_METALLOPROTEINASES	0.000308647
REACTOME_SUMO_IS_PROTEOLYTICALLY_PROCESSED	0.000301884
REACTOME_ASSEMBLY_AND_CELL_SURFACE_PRESENTATION_OF_NMDA_RECEPTORS	0.000298979
PID_TAP63_PATHWAY	0.000277176
REACTOME_MULTIFUNCTIONAL_ANION_EXCHANGERS	0.000268353
REACTOME_MRNA_EDITING	0.000265265
REACTOME_MAPK3_ERK1_ACTIVATION	0.000262124
REACTOME_TOXICITY_OF_BOTULINUM_TOXIN_TYPE_D_BONT_D_	0.000261695
REACTOME_REGULATION_OF_SIGNALING_BY_NODAL	0.000261531
REACTOME_RESPONSE_OF_MTB_TO_PHAGOCYTOSIS	0.000260884
BIOCARTA_MTOR_PATHWAY	0.000260639
REACTOME_ADVANCED_GLYCOSYLATION_ENDPRODUCT_RECEPTOR_SIGNALING	0.000260022
WP_PHOTODYNAMIC_THERAPYINDUCED_NFE2L2_NRF2_SURVIVAL_SIGNALING	0.000253646
REACTOME_N_GLYCAN_TRIMMING_AND_ELONGATION_IN_THE_CIS_GOLGI	0.000252391
REACTOME_DEGRADATION_OF_THE_EXTRACELLULAR_MATRIX	0.000251217
BIOCARTA_PDZS_PATHWAY	0.000249568
BIOCARTA_TALL1_PATHWAY	0.000248327
WP_METASTATIC_BRAIN_TUMOR	0.000236234
MEL18_DN.V1_UP	0.00023435
WP_THE_EFFECT_OF_PROGERIN_ON_THE_INVOLVED_GENES_IN_HUTCHINSONGILFORD_PROGERIA_SYNDROME	0.000234349
REACTOME_TRAF3_DEPENDENT_IRF_ACTIVATION_PATHWAY	0.000231039
BMI1_DN.V1_UP	0.000221104
REACTOME_TRNA_PROCESSING_IN_THE_MITOCHONDRION	0.00021843
WP_FARNESOID_X_RECEPTOR_PATHWAY	0.000217579
WP_NUCLEOTIDE_GPCRS	0.000205263
REACTOME_SODIUM_PROTON_EXCHANGERS	0.000204481
BMI1_DN_MEL18_DN.V1_UP	0.000202608
REACTOME_ERYTHROPOIETIN_ACTIVATES_STAT5	0.000201605
REACTOME_TLR3_MEDIATED_TICAM1_DEPENDENT_PROGRAMMED_CELL_DEATH	0.00019633
REACTOME_SIGNALING_BY_HEDGEHOG	0.000193903
HALLMARK_HEDGEHOG_SIGNALING	0.000192104
PID_IL3_PATHWAY	0.000191562
WP_DRUG_INDUCTION_OF_BILE_ACID_PATHWAY	0.000189914
REACTOME_SIGNAL_REGULATORY_PROTEIN_FAMILY_INTERACTIONS	0.000186898
REACTOME_SHC_RELATED_EVENTS_TRIGGERED_BY_IGF1R	0.000184951
WP_CELLULAR_PROTEOSTASIS	0.000184097
WP_GLUCURONIDATION	0.000180665
REACTOME_ORGANIC_CATION_TRANSPORT	0.000180152
REACTOME_SIGNALING_BY_NOTCH1_HD_DOMAIN_MUTANTS_IN_CANCER	0.00018002
REACTOME_DIGESTION_AND_ABSORPTION	0.000175926
REACTOME_PREVENTION_OF_PHAGOSOMAL_LYSOSOMAL_FUSION	0.000172075
REACTOME_SHC_MEDIATED_CASCADE_FGFR4	0.000171882
REACTOME_ACTIVATION_OF_GENE_EXPRESSION_BY_SREBF_SREBP_	0.00017041
PID_CASPASE_PATHWAY	0.000168179
REACTOME_FGFR2_LIGAND_BINDING_AND_ACTIVATION	0.000165889
SINGH_KRAS_DEPENDENCY_SIGNATURE	0.000164993
REACTOME_SYNTHESIS_OF_DOLICHYL_PHOSPHATE	0.000163891
REACTOME_DIGESTION_OF_DIETARY_LIPID	0.000163578
REACTOME_SIGNALING_BY_PDGFRA_TRANSMEMBRANE_JUXTAMEMBRANE_AND_KINASE_DOMAIN_MUTANTS	0.000161037
REACTOME_CRMPS_IN_SEMA3A_SIGNALING	0.000159599
BIOCARTA_TNFR1_PATHWAY	0.000159494
WP_NO_METABOLISM_IN_CYSTIC_FIBROSIS	0.000158278
WP_IL9_SIGNALING_PATHWAY	0.000150988
WP_MIRNA_REGULATION_OF_PROSTATE_CANCER_SIGNALING_PATHWAYS	0.00014822
WP_MONOAMINE_TRANSPORT	0.000147035
BIOCARTA_RHODOPSIN_PATHWAY	0.00014474
WP_BMP2WNT4FOXO1_PATHWAY_IN_HUMAN_PRIMARY_ENDOMETRIAL_STROMAL_CELL_DIFFERENTIATION	0.000144226
REACTOME_NTRK2_ACTIVATES_RAC1	0.0001436
REACTOME_DEFECTIVE_B4GALT7_CAUSES_EDS_PROGEROID_TYPE	0.000139752
REACTOME_HCMV_LATE_EVENTS	0.00013878
CRX_NRL_DN.V1_UP	0.000134894
REACTOME_GLYCEROPHOSPHOLIPID_BIOSYNTHESIS	0.000133861
REACTOME_STING_MEDIATED_INDUCTION_OF_HOST_IMMUNE_RESPONSES	0.000129608
WP_CELLTYPE_DEPENDENT_SELECTIVITY_OF_CCK2R_SIGNALING	0.000128945
PID_P73PATHWAY	0.000128457
REACTOME_SURFACTANT_METABOLISM	0.000123295
REACTOME_LYSINE_CATABOLISM	0.00011925
BIOCARTA_41BB_PATHWAY	0.000119061
WP_EDA_SIGNALLING_IN_HAIR_FOLLICLE_DEVELOPMENT	0.000118974
REACTOME_REGULATION_OF_TNFR1_SIGNALING	0.000116212
NFE2L2.V2	0.000113417
REACTOME_NON_INTEGRIN_MEMBRANE_ECM_INTERACTIONS	0.00010807
REACTOME_TRIGLYCERIDE_CATABOLISM	0.000107577
REACTOME_RESOLUTION_OF_ABASIC_SITES_AP_SITES_	0.000107146
REACTOME_TRIGLYCERIDE_METABOLISM	0.000104944
BIOCARTA_CDC42RAC_PATHWAY	0.000104511
PID_EPO_PATHWAY	0.000102577
SNF5_DN.V1_UP	0.000102346
BIOCARTA_PCAF_PATHWAY	0.000102263
REACTOME_LGI_ADAM_INTERACTIONS	0.000101584
REACTOME_REGULATION_OF_EXPRESSION_OF_SLITS_AND_ROBOS	9.95692e-05
KEGG_DNA_REPLICATION	9.79961e-05
KEGG_O_GLYCAN_BIOSYNTHESIS	8.79157e-05
REACTOME_P38MAPK_EVENTS	8.73168e-05
KEGG_GLYCOSPHINGOLIPID_BIOSYNTHESIS_LACTO_AND_NEOLACTO_SERIES	8.6489e-05
BIOCARTA_ACE2_PATHWAY	8.58964e-05
REACTOME_BIOTIN_TRANSPORT_AND_METABOLISM	8.56362e-05
REACTOME_DEADENYLATION_OF_MRNA	8.46438e-05
REACTOME_ZINC_INFLUX_INTO_CELLS_BY_THE_SLC39_GENE_FAMILY	8.44592e-05
WP_MELANOMA	8.38693e-05
REACTOME_PHOSPHOLIPASE_C_MEDIATED_CASCADE_FGFR2	8.37621e-05
BIOCARTA_G2_PATHWAY	8.3242e-05
REACTOME_REGULATION_OF_TP53_EXPRESSION_AND_DEGRADATION	8.23351e-05
REACTOME_UPTAKE_AND_FUNCTION_OF_ANTHRAX_TOXINS	8.19045e-05
WP_DDX1_AS_A_REGULATORY_COMPONENT_OF_THE_DROSHA_MICROPROCESSOR	7.89344e-05
BIOCARTA_PRC2_PATHWAY	7.50963e-05
REACTOME_PYRIMIDINE_SALVAGE	7.34609e-05
WP_METABOLIC_REPROGRAMMING_IN_COLON_CANCER	7.33546e-05
WP_MITOCHONDRIAL_LCFATTY_ACID_BETAOXIDATION	7.32459e-05
REACTOME_O_LINKED_GLYCOSYLATION_OF_MUCINS	7.23971e-05
PID_SYNDECAN_3_PATHWAY	6.91489e-05
REACTOME_G2_M_DNA_DAMAGE_CHECKPOINT	6.68726e-05
REACTOME_BICARBONATE_TRANSPORTERS	6.63431e-05
REACTOME_NEF_MEDIATED_CD4_DOWN_REGULATION	6.59874e-05
REACTOME_SULFIDE_OXIDATION_TO_SULFATE	6.581e-05
SRC_UP.V1_DN	6.22724e-05
REACTOME_PEPTIDE_HORMONE_METABOLISM	5.64422e-05
RB_P107_DN.V1_UP	4.10672e-05
REACTOME_THE_PHOTOTRANSDUCTION_CASCADE	4.05772e-05
WP_TUMOR_SUPPRESSOR_ACTIVITY_OF_SMARCB1	3.49023e-05
WP_MITOCHONDRIAL_GENE_EXPRESSION	3.05387e-05
WP_HEMATOPOIETIC_STEM_CELL_GENE_REGULATION_BY_GABP_ALPHABETA_COMPLEX	2.91023e-05
REACTOME_RUNX1_REGULATES_GENES_INVOLVED_IN_MEGAKARYOCYTE_DIFFERENTIATION_AND_PLATELET_FUNCTION	2.44153e-05
WP_FGF23_SIGNALLING_IN_HYPOPHOSPHATEMIC_RICKETS_AND_RELATED_DISORDERS	2.39566e-05
REACTOME_RUNX3_REGULATES_WNT_SIGNALING	2.30846e-05
WP_PTF1A_RELATED_REGULATORY_PATHWAY	2.06809e-05
WP_PATHWAYS_OF_NUCLEIC_ACID_METABOLISM_AND_INNATE_IMMUNE_SENSING	1.9972e-05
WP_PI3KAKTMTOR_VITD3_SIGNALLING	1.98963e-05
REACTOME_PROCESSING_OF_CAPPED_INTRONLESS_PRE_MRNA	1.44323e-05
REACTOME_MITOPHAGY	1.36014e-05

## Sheet: Suppl. Table S4
Supplemental Table S4: UCHL1-related cancer cell lines from CCLE with GDSC, PRISM and ionizing irradiation data
Sample ID	Prediction	GDSC	PRISM	Radiosensitivity	Cancer Type
ACH-000001	Other	Yes	Yes	Yes	Ovarian Cancer
ACH-000003	Other				Colon/Colorectal Cancer
ACH-000007	UCHL1-related	Yes	Yes	Yes	Colon/Colorectal Cancer
ACH-000008	Other	Yes	Yes	Yes	Skin Cancer
ACH-000009	UCHL1-related	Yes		Yes	Colon/Colorectal Cancer
ACH-000010	UCHL1-related				Lung Cancer
ACH-000011	Other		Yes		Bladder Cancer
ACH-000012	Other	Yes	Yes	Yes	Lung Cancer
ACH-000013	Other		Yes	Yes	Ovarian Cancer
ACH-000014	Other		Yes	Yes	Skin Cancer
ACH-000015	UCHL1-related	Yes	Yes		Lung Cancer
ACH-000016	Other				Kidney Cancer
ACH-000017	Other			Yes	Breast Cancer
ACH-000018	Other	Yes	Yes	Yes	Bladder Cancer
ACH-000019	Other	Yes	Yes	Yes	Breast Cancer
ACH-000021	Other	Yes	Yes		Lung Cancer
ACH-000022	UCHL1-related		Yes	Yes	Pancreatic Cancer
ACH-000023	Other	Yes	Yes	Yes	Pancreatic Cancer
ACH-000025	Other				Brain Cancer
ACH-000026	Other		Yes		Bladder Cancer
ACH-000027	Other		Yes	Yes	Brain Cancer
ACH-000028	Other				Breast Cancer
ACH-000029	Other				Lung Cancer
ACH-000030	Other	Yes	Yes	Yes	Lung Cancer
ACH-000031	Other				Pancreatic Cancer
ACH-000033	Other				Lung Cancer
ACH-000035	Other	Yes	Yes	Yes	Lung Cancer
ACH-000036	Other				Brain Cancer
ACH-000037	Other		Yes		Sarcoma
ACH-000039	UCHL1-related			Yes	Bone Cancer
ACH-000040	Other	Yes	Yes	Yes	Brain Cancer
ACH-000041	UCHL1-related		Yes		Bone Cancer
ACH-000042	Other	Yes	Yes	Yes	Pancreatic Cancer
ACH-000043	Other			Yes	Fibroblast
ACH-000044	UCHL1-related				Breast Cancer
ACH-000046	Other	Yes	Yes	Yes	Kidney Cancer
ACH-000048	UCHL1-related	Yes	Yes	Yes	Ovarian Cancer
ACH-000051	UCHL1-related		Yes	Yes	Sarcoma
ACH-000052	UCHL1-related	Yes	Yes	Yes	Bone Cancer
ACH-000054	Other	Yes	Yes		Sarcoma
ACH-000055	UCHL1-related	Yes		Yes	Brain Cancer
ACH-000058	Other	Yes		Yes	Thyroid Cancer
ACH-000060	Other	Yes	Yes	Yes	Pancreatic Cancer
ACH-000062	Other	Yes	Yes	Yes	Lung Cancer
ACH-000063	Other				Fibroblast
ACH-000066	Other		Yes	Yes	Lung Cancer
ACH-000067	Other	Yes		Yes	Brain Cancer
ACH-000071	Other				Fibroblast
ACH-000075	Other	Yes	Yes	Yes	Brain Cancer
ACH-000078	Other	Yes	Yes	Yes	Neuroblastoma
ACH-000079	Other			Yes	Fibroblast
ACH-000082	Other	Yes	Yes	Yes	Bone Cancer
ACH-000083	Other				Fibroblast
ACH-000085	Other		Yes		Pancreatic Cancer
ACH-000086	Other		Yes	Yes	Lung Cancer
ACH-000087	UCHL1-related	Yes	Yes	Yes	Bone Cancer
ACH-000088	Other				Fibroblast
ACH-000089	Other				Colon/Colorectal Cancer
ACH-000090	Other	Yes	Yes	Yes	Prostate Cancer
ACH-000091	Other	Yes	Yes	Yes	Ovarian Cancer
ACH-000092	Other	Yes	Yes	Yes	Lung Cancer
ACH-000093	Other		Yes	Yes	Pancreatic Cancer
ACH-000094	Other	Yes		Yes	Pancreatic Cancer
ACH-000095	UCHL1-related				Brain Cancer
ACH-000096	UCHL1-related	Yes	Yes	Yes	Rhabdoid
ACH-000097	UCHL1-related		Yes	Yes	Breast Cancer
ACH-000098	Other	Yes	Yes	Yes	Brain Cancer
ACH-000099	UCHL1-related	Yes	Yes		Neuroblastoma
ACH-000100	UCHL1-related	Yes		Yes	Sarcoma
ACH-000102	Other	Yes	Yes	Yes	Brain Cancer
ACH-000103	Other	Yes			Ovarian Cancer
ACH-000107	Other	Yes	Yes	Yes	Pancreatic Cancer
ACH-000108	Other	Yes	Yes	Yes	Pancreatic Cancer
ACH-000109	Other				Lung Cancer
ACH-000110	Other				Gastric Cancer
ACH-000111	Other	Yes			Breast Cancer
ACH-000114	Other	Yes	Yes	Yes	Pancreatic Cancer
ACH-000115	UCHL1-related	Yes		Yes	Prostate Cancer
ACH-000116	UCHL1-related	Yes	Yes		Ovarian Cancer
ACH-000117	Other	Yes	Yes	Yes	Breast Cancer
ACH-000118	Other	Yes	Yes	Yes	Pancreatic Cancer
ACH-000119	Other				Fibroblast
ACH-000120	Other	Yes	Yes	Yes	Neuroblastoma
ACH-000121	Other	Yes		Yes	Lung Cancer
ACH-000123	UCHL1-related		Yes	Yes	Ovarian Cancer
ACH-000125	Other				Fibroblast
ACH-000126	Other				Brain Cancer
ACH-000127	Other				Kidney Cancer
ACH-000128	Other				Brain Cancer
ACH-000129	UCHL1-related	Yes		Yes	Lung Cancer
ACH-000131	Other				Fibroblast
ACH-000132	Other	Yes	Yes	Yes	Ovarian Cancer
ACH-000133	Other		Yes	Yes	Fibroblast
ACH-000134	Other				Fibroblast
ACH-000135	Other	Yes			Fibroblast
ACH-000136	UCHL1-related	Yes			Neuroblastoma
ACH-000137	Other	Yes	Yes	Yes	Brain Cancer
ACH-000138	Other	Yes	Yes	Yes	Pancreatic Cancer
ACH-000139	Other	Yes	Yes	Yes	Pancreatic Cancer
ACH-000141	Other		Yes	Yes	Gallbladder Cancer
ACH-000142	Other	Yes	Yes		Bladder Cancer
ACH-000143	UCHL1-related				Lung Cancer
ACH-000144	Other	Yes			Gastric Cancer
ACH-000145	Other	Yes		Yes	Sarcoma
ACH-000147	Other	Yes	Yes	Yes	Breast Cancer
ACH-000148	Other	Yes			Breast Cancer
ACH-000149	Other	Yes	Yes	Yes	Neuroblastoma
ACH-000150	Other			Yes	Lung Cancer
ACH-000152	Other			Yes	Brain Cancer
ACH-000153	Other	Yes	Yes	Yes	Lung Cancer
ACH-000154	Other			Yes	Fibroblast
ACH-000155	Other	Yes	Yes	Yes	Pancreatic Cancer
ACH-000159	Other	Yes	Yes	Yes	Kidney Cancer
ACH-000160	Other				Rhabdoid
ACH-000161	Other	Yes	Yes	Yes	Lung Cancer
ACH-000163	Other		Yes	Yes	Thyroid Cancer
ACH-000164	Other		Yes		Pancreatic Cancer
ACH-000165	Other				Fibroblast
ACH-000169	Other	Yes	Yes	Yes	Sarcoma
ACH-000171	Other	Yes	Yes	Yes	Kidney Cancer
ACH-000172	Other		Yes		Rhabdoid
ACH-000173	Other			Yes	Endometrial/Uterine Cancer
ACH-000174	Other	Yes	Yes		Thyroid Cancer
ACH-000175	Other				Fibroblast
ACH-000176	Other	Yes	Yes	Yes	Lung Cancer
ACH-000177	UCHL1-related				Prostate Cancer
ACH-000178	Other	Yes	Yes	Yes	Pancreatic Cancer
ACH-000179	UCHL1-related				Lung Cancer
ACH-000180	Other			Yes	Fibroblast
ACH-000181	Other	Yes		Yes	Head and Neck Cancer
ACH-000182	Other		Yes	Yes	Bile Duct Cancer
ACH-000184	Other				Fibroblast
ACH-000185	Other				Fibroblast
ACH-000186	Other	Yes	Yes		Lung Cancer
ACH-000187	UCHL1-related	Yes			Lung Cancer
ACH-000188	Other	Yes	Yes	Yes	Head and Neck Cancer
ACH-000189	Other	Yes	Yes	Yes	Kidney Cancer
ACH-000191	Other	Yes	Yes	Yes	Thyroid Cancer
ACH-000192	UCHL1-related	Yes	Yes		Endometrial/Uterine Cancer
ACH-000194	Other			Yes	Fibroblast
ACH-000196	UCHL1-related	Yes			Breast Cancer
ACH-000199	Other				Fibroblast
ACH-000200	Other	Yes	Yes		Brain Cancer
ACH-000201	Other	Yes	Yes	Yes	Rhabdoid
ACH-000202	UCHL1-related			Yes	Colon/Colorectal Cancer
ACH-000203	UCHL1-related				Neuroblastoma
ACH-000205	Other		Yes	Yes	Pancreatic Cancer
ACH-000207	Other	Yes	Yes	Yes	Head and Neck Cancer
ACH-000208	Other				Brain Cancer
ACH-000209	Other		Yes		Bile Duct Cancer
ACH-000210	Other	Yes	Yes		Bone Cancer
ACH-000211	Other	Yes	Yes	Yes	Brain Cancer
ACH-000212	Other	Yes	Yes		Breast Cancer
ACH-000213	Other	Yes	Yes	Yes	Pancreatic Cancer
ACH-000214	Other				Fibroblast
ACH-000215	Other				Brain Cancer
ACH-000216	Other				Esophageal Cancer
ACH-000217	Other	Yes	Yes	Yes	Liver Cancer
ACH-000219	Other	Yes	Yes		Skin Cancer
ACH-000221	UCHL1-related	Yes	Yes	Yes	Liver Cancer
ACH-000222	Other	Yes	Yes	Yes	Pancreatic Cancer
ACH-000223	Other	Yes	Yes	Yes	Breast Cancer
ACH-000224	Other			Yes	Fibroblast
ACH-000225	UCHL1-related	Yes		Yes	Gastric Cancer
ACH-000227	UCHL1-related	Yes	Yes		Neuroblastoma
ACH-000228	Other	Yes	Yes	Yes	Head and Neck Cancer
ACH-000229	Other				Fibroblast
ACH-000230	Other				Fibroblast
ACH-000231	Other	Yes	Yes	Yes	Brain Cancer
ACH-000232	Other	Yes	Yes	Yes	Brain Cancer
ACH-000234	Other		Yes	Yes	Kidney Cancer
ACH-000235	Other	Yes	Yes	Yes	Pancreatic Cancer
ACH-000236	Other	Yes		Yes	Colon/Colorectal Cancer
ACH-000237	Other		Yes	Yes	Ovarian Cancer
ACH-000238	Other	Yes			Head and Neck Cancer
ACH-000239	UCHL1-related				Gastric Cancer
ACH-000240	Other				Fibroblast
ACH-000242	Other	Yes	Yes	Yes	Bladder Cancer
ACH-000243	Other	Yes	Yes	Yes	Pancreatic Cancer
ACH-000244	Other	Yes	Yes	Yes	Brain Cancer
ACH-000246	Other				Kidney Cancer
ACH-000247	UCHL1-related	Yes		Yes	Gastric Cancer
ACH-000248	Other	Yes		Yes	Breast Cancer
ACH-000249	Other	Yes	Yes	Yes	Colon/Colorectal Cancer
ACH-000250	Other	Yes	Yes		Kidney Cancer
ACH-000251	Other				Lung Cancer
ACH-000252	Other	Yes	Yes	Yes	Colon/Colorectal Cancer
ACH-000253	Other				Colon/Colorectal Cancer
ACH-000254	Other	Yes			Head and Neck Cancer
ACH-000255	Other		Yes	Yes	Gastric Cancer
ACH-000256	Other		Yes	Yes	Ovarian Cancer
ACH-000257	UCHL1-related	Yes			Lung Cancer
ACH-000258	UCHL1-related	Yes			Breast Cancer
ACH-000259	UCHL1-related	Yes	Yes		Neuroblastoma
ACH-000260	Other	Yes	Yes	Yes	Neuroblastoma
ACH-000261	Other		Yes	Yes	Lung Cancer
ACH-000262	Other				Kidney Cancer
ACH-000264	Other	Yes	Yes		Lung Cancer
ACH-000265	Other	Yes	Yes		Pancreatic Cancer
ACH-000266	Other		Yes		Pancreatic Cancer
ACH-000268	UCHL1-related		Yes	Yes	Bile Duct Cancer
ACH-000269	Other	Yes	Yes	Yes	Brain Cancer
ACH-000270	Other	Yes	Yes		Pancreatic Cancer
ACH-000272	Other				Kidney Cancer
ACH-000273	Other	Yes	Yes	Yes	Brain Cancer
ACH-000274	Other		Yes		Skin Cancer
ACH-000275	Other				Fibroblast
ACH-000276	Other	Yes	Yes	Yes	Breast Cancer
ACH-000277	Other	Yes	Yes	Yes	Breast Cancer
ACH-000278	Other		Yes	Yes	Ovarian Cancer
ACH-000279	UCHL1-related		Yes		Bone Cancer
ACH-000280	Other		Yes	Yes	Ovarian Cancer
ACH-000281	Other	Yes	Yes	Yes	Pancreatic Cancer
ACH-000282	Other	Yes		Yes	Lung Cancer
ACH-000283	Other				Brain Cancer
ACH-000284	Other				Fibroblast
ACH-000286	Other			Yes	Colon/Colorectal Cancer
ACH-000288	Other	Yes	Yes	Yes	Breast Cancer
ACH-000289	Other		Yes	Yes	Brain Cancer
ACH-000290	UCHL1-related	Yes			Lung Cancer
ACH-000291	Other	Yes	Yes	Yes	Ovarian Cancer
ACH-000292	UCHL1-related	Yes	Yes	Yes	Lung Cancer
ACH-000293	Other	Yes		Yes	Endometrial/Uterine Cancer
ACH-000296	Other		Yes		Colon/Colorectal Cancer
ACH-000297	UCHL1-related				Lung Cancer
ACH-000298	UCHL1-related	Yes			Lung Cancer
ACH-000300	Other				Kidney Cancer
ACH-000302	Other		Yes	Yes	Endometrial/Uterine Cancer
ACH-000303	Other	Yes			Gastric Cancer
ACH-000304	Other	Yes		Yes	Skin Cancer
ACH-000305	Other	Yes	Yes	Yes	Esophageal Cancer
ACH-000306	Other				Fibroblast
ACH-000307	Other		Yes	Yes	Pancreatic Cancer
ACH-000308	Other	Yes	Yes	Yes	Ovarian Cancer
ACH-000310	UCHL1-related			Yes	Neuroblastoma
ACH-000311	Other	Yes	Yes	Yes	Lung Cancer
ACH-000312	UCHL1-related		Yes		Neuroblastoma
ACH-000313	Other		Yes	Yes	Kidney Cancer
ACH-000314	Other			Yes	Lung Cancer
ACH-000316	Other		Yes	Yes	Liver Cancer
ACH-000317	Other				Kidney Cancer
ACH-000318	Other	Yes	Yes	Yes	Esophageal Cancer
ACH-000319	Other	Yes	Yes	Yes	Lung Cancer
ACH-000320	Other	Yes	Yes	Yes	Pancreatic Cancer
ACH-000322	Other	Yes	Yes	Yes	Skin Cancer
ACH-000323	Other	Yes	Yes	Yes	Brain Cancer
ACH-000324	Other		Yes	Yes	Ovarian Cancer
ACH-000325	UCHL1-related				Gastric Cancer
ACH-000327	Other	Yes		Yes	Lung Cancer
ACH-000328	Other				Brain Cancer
ACH-000329	Other	Yes	Yes	Yes	Brain Cancer
ACH-000330	Other	Yes	Yes		Breast Cancer
ACH-000331	Other		Yes		Lung Cancer
ACH-000332	UCHL1-related	Yes	Yes		Pancreatic Cancer
ACH-000333	Other				Ovarian Cancer
ACH-000335	Other	Yes	Yes		Lung Cancer
ACH-000337	Other	Yes			Lung Cancer
ACH-000339	Other				Lung Cancer
ACH-000340	Other				Fibroblast
ACH-000341	UCHL1-related	Yes	Yes	Yes	Neuroblastoma
ACH-000342	Other				Colon/Colorectal Cancer
ACH-000343	UCHL1-related	Yes	Yes	Yes	Lung Cancer
ACH-000344	Other		Yes	Yes	Gastric Cancer
ACH-000345	UCHL1-related	Yes			Neuroblastoma
ACH-000347	UCHL1-related	Yes	Yes	Yes	Pancreatic Cancer
ACH-000348	Other	Yes	Yes		Skin Cancer
ACH-000349	UCHL1-related	Yes			Breast Cancer
ACH-000350	Other	Yes	Yes	Yes	Colon/Colorectal Cancer
ACH-000351	Other	Yes	Yes		Gastric Cancer
ACH-000352	Other	Yes	Yes	Yes	Breast Cancer
ACH-000353	Other	Yes		Yes	Esophageal Cancer
ACH-000354	Other	Yes		Yes	Pancreatic Cancer
ACH-000355	UCHL1-related	Yes			Lung Cancer
ACH-000356	UCHL1-related	Yes	Yes	Yes	Gastric Cancer
ACH-000358	UCHL1-related	Yes		Yes	Lung Cancer
ACH-000359	Other	Yes	Yes	Yes	Bone Cancer
ACH-000360	UCHL1-related	Yes		Yes	Colon/Colorectal Cancer
ACH-000361	Other	Yes	Yes	Yes	Liver Cancer
ACH-000364	Other	Yes	Yes	Yes	Bone Cancer
ACH-000366	UCHL1-related	Yes	Yes		Neuroblastoma
ACH-000367	Other	Yes	Yes	Yes	Lung Cancer
ACH-000368	Other		Yes	Yes	Brain Cancer
ACH-000370	Other				Brain Cancer
ACH-000374	Other	Yes	Yes		Breast Cancer
ACH-000375	Other	Yes	Yes	Yes	Kidney Cancer
ACH-000376	Other	Yes	Yes	Yes	Brain Cancer
ACH-000377	Other			Yes	Bile Duct Cancer
ACH-000378	Other	Yes	Yes		Lung Cancer
ACH-000379	Other	Yes		Yes	Lung Cancer
ACH-000381	Other	Yes		Yes	Colon/Colorectal Cancer
ACH-000382	UCHL1-related				Lung Cancer
ACH-000383	Other	Yes	Yes	Yes	Esophageal Cancer
ACH-000384	Other	Yes	Yes		Bladder Cancer
ACH-000385	Other				Kidney Cancer
ACH-000389	Other	Yes	Yes	Yes	Brain Cancer
ACH-000390	Other		Yes	Yes	Lung Cancer
ACH-000391	Other	Yes	Yes	Yes	Bone Cancer
ACH-000392	Other	Yes		Yes	Lung Cancer
ACH-000393	Other		Yes	Yes	Liver Cancer
ACH-000394	UCHL1-related	Yes			Lung Cancer
ACH-000395	UCHL1-related	Yes	Yes	Yes	Lung Cancer
ACH-000396	Other	Yes	Yes	Yes	Bladder Cancer
ACH-000397	UCHL1-related		Yes		Endometrial/Uterine Cancer
ACH-000399	UCHL1-related	Yes	Yes	Yes	Lung Cancer
ACH-000400	Other	Yes	Yes	Yes	Colon/Colorectal Cancer
ACH-000401	Other	Yes	Yes	Yes	Skin Cancer
ACH-000403	Other	Yes	Yes	Yes	Colon/Colorectal Cancer
ACH-000404	Other		Yes	Yes	Skin Cancer
ACH-000407	Other		Yes	Yes	Endometrial/Uterine Cancer
ACH-000408	Other	Yes	Yes		Esophageal Cancer
ACH-000409	Other			Yes	Ovarian Cancer
ACH-000410	Other	Yes		Yes	Bone Cancer
ACH-000411	Other	Yes	Yes	Yes	Kidney Cancer
ACH-000412	Other				Colon/Colorectal Cancer
ACH-000413	Other				Fibroblast
ACH-000414	Other	Yes	Yes	Yes	Lung Cancer
ACH-000415	Other		Yes	Yes	Head and Neck Cancer
ACH-000416	Other	Yes	Yes	Yes	Lung Cancer
ACH-000417	Other	Yes	Yes	Yes	Pancreatic Cancer
ACH-000418	Other		Yes		Bone Cancer
ACH-000420	Other	Yes	Yes	Yes	Liver Cancer
ACH-000421	UCHL1-related	Yes	Yes	Yes	Colon/Colorectal Cancer
ACH-000422	Other	Yes		Yes	Liver Cancer
ACH-000423	Other	Yes	Yes	Yes	Skin Cancer
ACH-000424	UCHL1-related	Yes			Bone Cancer
ACH-000425	Other	Yes	Yes		Skin Cancer
ACH-000427	UCHL1-related	Yes	Yes	Yes	Gastric Cancer
ACH-000428	Other	Yes	Yes	Yes	Kidney Cancer
ACH-000429	Other	Yes	Yes		Kidney Cancer
ACH-000430	Other	Yes	Yes	Yes	Ovarian Cancer
ACH-000431	UCHL1-related	Yes			Lung Cancer
ACH-000433	Other	Yes	Yes	Yes	Kidney Cancer
ACH-000434	Other	Yes	Yes	Yes	Lung Cancer
ACH-000435	Other		Yes	Yes	Endometrial/Uterine Cancer
ACH-000437	Other	Yes	Yes	Yes	Brain Cancer
ACH-000438	Other	Yes			Lung Cancer
ACH-000441	Other	Yes	Yes		Skin Cancer
ACH-000442	Other	Yes			Lung Cancer
ACH-000443	Other	Yes	Yes	Yes	Ovarian Cancer
ACH-000444	Other		Yes	Yes	Lung Cancer
ACH-000445	Other		Yes	Yes	Brain Cancer
ACH-000446	Other		Yes	Yes	Neuroblastoma
ACH-000447	Other	Yes	Yes	Yes	Lung Cancer
ACH-000448	Other	Yes		Yes	Lung Cancer
ACH-000449	UCHL1-related	Yes	Yes	Yes	Sarcoma
ACH-000450	Other	Yes	Yes	Yes	Skin Cancer
ACH-000451	Other	Yes			Lung Cancer
ACH-000452	Other	Yes	Yes	Yes	Esophageal Cancer
ACH-000454	UCHL1-related		Yes	Yes	Lung Cancer
ACH-000455	Other				Brain Cancer
ACH-000456	Other	Yes	Yes	Yes	Thyroid Cancer
ACH-000457	Other	Yes	Yes	Yes	Kidney Cancer
ACH-000458	Other		Yes	Yes	Skin Cancer
ACH-000459	Other			Yes	Kidney Cancer
ACH-000460	Other				Ovarian Cancer
ACH-000461	Other		Yes	Yes	Bile Duct Cancer
ACH-000463	Other	Yes	Yes		Lung Cancer
ACH-000464	Other	Yes	Yes		Brain Cancer
ACH-000465	Other	Yes			Skin Cancer
ACH-000466	Other		Yes	Yes	Gastric Cancer
ACH-000467	UCHL1-related		Yes	Yes	Colon/Colorectal Cancer
ACH-000468	Other		Yes	Yes	Pancreatic Cancer
ACH-000469	Other	Yes	Yes	Yes	Brain Cancer
ACH-000470	UCHL1-related	Yes	Yes	Yes	Colon/Colorectal Cancer
ACH-000471	Other		Yes	Yes	Liver Cancer
ACH-000472	Other	Yes	Yes	Yes	Head and Neck Cancer
ACH-000473	Other	Yes	Yes	Yes	Bladder Cancer
ACH-000475	Other	Yes	Yes	Yes	Liver Cancer
ACH-000476	Other	Yes	Yes	Yes	Liver Cancer
ACH-000477	Other		Yes		Skin Cancer
ACH-000478	Other	Yes		Yes	Liver Cancer
ACH-000479	Other		Yes	Yes	Brain Cancer
ACH-000480	UCHL1-related	Yes	Yes		Liver Cancer
ACH-000481	UCHL1-related	Yes	Yes	Yes	Lung Cancer
ACH-000482	Other	Yes	Yes		Lung Cancer
ACH-000483	Other	Yes	Yes	Yes	Liver Cancer
ACH-000484	Other	Yes	Yes	Yes	Kidney Cancer
ACH-000485	UCHL1-related		Yes		Gastric Cancer
ACH-000486	Other	Yes	Yes	Yes	Bladder Cancer
ACH-000488	Other	Yes	Yes	Yes	Esophageal Cancer
ACH-000489	Other	Yes	Yes	Yes	Colon/Colorectal Cancer
ACH-000490	Other				Brain Cancer
ACH-000491	UCHL1-related	Yes			Colon/Colorectal Cancer
ACH-000493	Other	Yes	Yes	Yes	Liver Cancer
ACH-000495	Other		Yes		Kidney Cancer
ACH-000496	Other	Yes	Yes	Yes	Lung Cancer
ACH-000499	UCHL1-related		Yes		Bone Cancer
ACH-000500	Other		Yes	Yes	Head and Neck Cancer
ACH-000501	Other	Yes		Yes	Colon/Colorectal Cancer
ACH-000502	Other		Yes	Yes	Pancreatic Cancer
ACH-000503	Other		Yes	Yes	Head and Neck Cancer
ACH-000504	Other	Yes	Yes	Yes	Brain Cancer
ACH-000505	Other	Yes	Yes		Sarcoma
ACH-000506	UCHL1-related	Yes			Lung Cancer
ACH-000507	UCHL1-related		Yes	Yes	Gastric Cancer
ACH-000508	UCHL1-related	Yes			Lung Cancer
ACH-000510	Other	Yes	Yes	Yes	Lung Cancer
ACH-000511	Other			Yes	Lung Cancer
ACH-000513	Other			Yes	Kidney Cancer
ACH-000514	UCHL1-related	Yes			Lung Cancer
ACH-000515	UCHL1-related	Yes			Lung Cancer
ACH-000516	Other	Yes	Yes	Yes	Bone Cancer
ACH-000517	Other		Yes		Pancreatic Cancer
ACH-000518	Other	Yes	Yes		Head and Neck Cancer
ACH-000520	Other				Ovarian Cancer
ACH-000521	Other	Yes	Yes	Yes	Lung Cancer
ACH-000522	Other	Yes		Yes	Bladder Cancer
ACH-000523	UCHL1-related				Lung Cancer
ACH-000524	Other	Yes	Yes	Yes	Ovarian Cancer
ACH-000525	UCHL1-related	Yes			Lung Cancer
ACH-000526	Other				Fibroblast
ACH-000527	Other	Yes	Yes	Yes	Ovarian Cancer
ACH-000528	Other	Yes	Yes		Lung Cancer
ACH-000529	Other				Fibroblast
ACH-000530	UCHL1-related	Yes	Yes	Yes	Lung Cancer
ACH-000531	Other				Fibroblast
ACH-000532	Other	Yes	Yes	Yes	Colon/Colorectal Cancer
ACH-000533	Other		Yes		Rhabdoid
ACH-000535	Other	Yes	Yes	Yes	Pancreatic Cancer
ACH-000536	Other	Yes		Yes	Breast Cancer
ACH-000537	Other		Yes	Yes	Liver Cancer
ACH-000538	UCHL1-related	Yes			Gastric Cancer
ACH-000539	Other				Fibroblast
ACH-000540	Other				Fibroblast
ACH-000542	Other		Yes	Yes	Ovarian Cancer
ACH-000543	Other		Yes		Brain Cancer
ACH-000544	Other	Yes	Yes	Yes	Esophageal Cancer
ACH-000545	Other	Yes	Yes	Yes	Bladder Cancer
ACH-000546	Other	Yes		Yes	Head and Neck Cancer
ACH-000547	Other	Yes	Yes	Yes	Bladder Cancer
ACH-000548	Other	Yes	Yes		Head and Neck Cancer
ACH-000549	Other		Yes		Head and Neck Cancer
ACH-000550	Other			Yes	Skin Cancer
ACH-000552	UCHL1-related	Yes	Yes	Yes	Colon/Colorectal Cancer
ACH-000553	Other		Yes	Yes	Lung Cancer
ACH-000554	UCHL1-related	Yes			Breast Cancer
ACH-000555	Other	Yes	Yes	Yes	Kidney Cancer
ACH-000556	Other	Yes			Cervical Cancer
ACH-000558	Other	Yes	Yes	Yes	Brain Cancer
ACH-000559	UCHL1-related	Yes			Lung Cancer
ACH-000560	UCHL1-related	Yes			Gastric Cancer
ACH-000561	Other	Yes	Yes		Esophageal Cancer
ACH-000562	Other	Yes	Yes	Yes	Lung Cancer
ACH-000563	Other	Yes	Yes	Yes	Lung Cancer
ACH-000565	Other	Yes	Yes	Yes	Colon/Colorectal Cancer
ACH-000566	Other	Yes	Yes	Yes	Bladder Cancer
ACH-000568	Other	Yes			Breast Cancer
ACH-000569	Other	Yes	Yes	Yes	Lung Cancer
ACH-000570	Other	Yes	Yes	Yes	Brain Cancer
ACH-000571	Other	Yes	Yes	Yes	Brain Cancer
ACH-000572	Other	Yes	Yes		Skin Cancer
ACH-000573	Other	Yes	Yes		Breast Cancer
ACH-000574	Other	Yes		Yes	Ovarian Cancer
ACH-000575	Other				Lung Cancer
ACH-000577	Other	Yes		Yes	Liver Cancer
ACH-000578	Other			Yes	Lung Cancer
ACH-000579	Other	Yes	Yes		Skin Cancer
ACH-000580	Other	Yes	Yes	Yes	Skin Cancer
ACH-000581	UCHL1-related	Yes			Gastric Cancer
ACH-000582	Other		Yes		Skin Cancer
ACH-000584	Other	Yes			Ovarian Cancer
ACH-000585	Other	Yes		Yes	Lung Cancer
ACH-000586	UCHL1-related	Yes			Lung Cancer
ACH-000587	Other	Yes	Yes	Yes	Lung Cancer
ACH-000589	Other	Yes	Yes		Lung Cancer
ACH-000590	Other		Yes		Lung Cancer
ACH-000591	Other				Brain Cancer
ACH-000592	Other		Yes	Yes	Brain Cancer
ACH-000593	Other		Yes	Yes	Bladder Cancer
ACH-000594	UCHL1-related				Lung Cancer
ACH-000595	Other	Yes	Yes	Yes	Brain Cancer
ACH-000596	Other	Yes		Yes	Lung Cancer
ACH-000597	UCHL1-related		Yes		Rhabdoid
ACH-000599	Other	Yes	Yes	Yes	Pancreatic Cancer
ACH-000600	Other				Kidney Cancer
ACH-000601	Other	Yes	Yes	Yes	Pancreatic Cancer
ACH-000603	Other	Yes	Yes		Lung Cancer
ACH-000605	UCHL1-related	Yes	Yes	Yes	Esophageal Cancer
ACH-000606	Other			Yes	Head and Neck Cancer
ACH-000607	UCHL1-related	Yes		Yes	Rhabdoid
ACH-000608	Other		Yes	Yes	Ovarian Cancer
ACH-000609	Other	Yes	Yes	Yes	Brain Cancer
ACH-000610	UCHL1-related	Yes			Lung Cancer
ACH-000613	Other	Yes	Yes	Yes	Bone Cancer
ACH-000614	Other	Yes	Yes	Yes	Skin Cancer
ACH-000615	Other	Yes		Yes	Skin Cancer
ACH-000616	Other	Yes	Yes	Yes	Gastric Cancer
ACH-000617	Other	Yes	Yes	Yes	Ovarian Cancer
ACH-000618	Other		Yes	Yes	Head and Neck Cancer
ACH-000619	Other	Yes	Yes	Yes	Head and Neck Cancer
ACH-000620	Other	Yes	Yes	Yes	Liver Cancer
ACH-000621	Other	Yes		Yes	Breast Cancer
ACH-000622	UCHL1-related	Yes	Yes	Yes	Brain Cancer
ACH-000623	Other		Yes		Brain Cancer
ACH-000624	Other	Yes	Yes	Yes	Breast Cancer
ACH-000625	UCHL1-related	Yes	Yes	Yes	Liver Cancer
ACH-000627	Other	Yes	Yes	Yes	Lung Cancer
ACH-000628	Other	Yes	Yes		Lung Cancer
ACH-000629	Other				Brain Cancer
ACH-000630	Other		Yes	Yes	Head and Neck Cancer
ACH-000631	Other	Yes	Yes		Brain Cancer
ACH-000632	Other		Yes	Yes	Skin Cancer
ACH-000633	UCHL1-related	Yes			Gastric Cancer
ACH-000634	Other				Brain Cancer
ACH-000635	Other			Yes	Ovarian Cancer
ACH-000637	Other	Yes	Yes	Yes	Esophageal Cancer
ACH-000638	Other	Yes	Yes		Lung Cancer
ACH-000639	UCHL1-related	Yes		Yes	Lung Cancer
ACH-000640	Other	Yes			Skin Cancer
ACH-000643	Other	Yes	Yes		Breast Cancer
ACH-000644	Other	Yes	Yes	Yes	Skin Cancer
ACH-000645	Other		Yes	Yes	Lung Cancer
ACH-000646	Other			Yes	Ovarian Cancer
ACH-000647	Other	Yes	Yes	Yes	Esophageal Cancer
ACH-000648	Other	Yes	Yes		Lung Cancer
ACH-000649	Other	Yes	Yes	Yes	Kidney Cancer
ACH-000650	Other	Yes	Yes	Yes	Skin Cancer
ACH-000651	UCHL1-related	Yes	Yes		Colon/Colorectal Cancer
ACH-000652	Other	Yes	Yes		Pancreatic Cancer
ACH-000655	Other	Yes		Yes	Brain Cancer
ACH-000657	UCHL1-related	Yes	Yes	Yes	Ovarian Cancer
ACH-000659	UCHL1-related				Lung Cancer
ACH-000661	Other		Yes	Yes	Skin Cancer
ACH-000662	Other	Yes	Yes		Lung Cancer
ACH-000663	Other	Yes	Yes	Yes	Ovarian Cancer
ACH-000665	Other	Yes	Yes	Yes	Lung Cancer
ACH-000666	Other	Yes	Yes	Yes	Lung Cancer
ACH-000667	Other	Yes	Yes	Yes	Lung Cancer
ACH-000668	Other	Yes			Breast Cancer
ACH-000669	Other	Yes	Yes		Lung Cancer
ACH-000670	UCHL1-related	Yes	Yes		Lung Cancer
ACH-000671	UCHL1-related		Yes		Liver Cancer
ACH-000672	Other	Yes	Yes	Yes	Lung Cancer
ACH-000673	Other				Brain Cancer
ACH-000674	Other	Yes	Yes	Yes	Gastric Cancer
ACH-000675	Other	Yes			Lung Cancer
ACH-000676	Other				Brain Cancer
ACH-000677	UCHL1-related	Yes	Yes	Yes	Lung Cancer
ACH-000678	Other	Yes	Yes	Yes	Gastric Cancer
ACH-000679	UCHL1-related	Yes	Yes	Yes	Esophageal Cancer
ACH-000680	UCHL1-related	Yes	Yes	Yes	Colon/Colorectal Cancer
ACH-000681	Other	Yes	Yes		Lung Cancer
ACH-000682	Other		Yes	Yes	Head and Neck Cancer
ACH-000683	UCHL1-related			Yes	Colon/Colorectal Cancer
ACH-000684	Other	Yes	Yes	Yes	Kidney Cancer
ACH-000685	Other		Yes	Yes	Pancreatic Cancer
ACH-000686	Other		Yes		Liver Cancer
ACH-000688	Other	Yes	Yes	Yes	Ovarian Cancer
ACH-000689	Other	Yes		Yes	Sarcoma
ACH-000690	Other				Lung Cancer
ACH-000691	UCHL1-related	Yes			Breast Cancer
ACH-000692	Other		Yes	Yes	Head and Neck Cancer
ACH-000693	Other	Yes	Yes	Yes	Esophageal Cancer
ACH-000694	Other	Yes	Yes	Yes	Esophageal Cancer
ACH-000695	UCHL1-related				Lung Cancer
ACH-000696	Other	Yes	Yes	Yes	Ovarian Cancer
ACH-000698	UCHL1-related	Yes	Yes	Yes	Lung Cancer
ACH-000699	Other	Yes	Yes		Breast Cancer
ACH-000700	Other				Lung Cancer
ACH-000701	Other		Yes	Yes	Ovarian Cancer
ACH-000703	UCHL1-related	Yes			Lung Cancer
ACH-000704	Other	Yes	Yes	Yes	Ovarian Cancer
ACH-000705	UCHL1-related				Lung Cancer
ACH-000706	Other	Yes	Yes	Yes	Lung Cancer
ACH-000708	UCHL1-related			Yes	Colon/Colorectal Cancer
ACH-000709	Other			Yes	Kidney Cancer
ACH-000710	Other				Lung Cancer
ACH-000711	Other	Yes	Yes		Breast Cancer
ACH-000712	UCHL1-related			Yes	Lung Cancer
ACH-000713	Other	Yes	Yes	Yes	Ovarian Cancer
ACH-000715	Other		Yes	Yes	Head and Neck Cancer
ACH-000716	Other	Yes	Yes	Yes	Thyroid Cancer
ACH-000717	Other	Yes	Yes	Yes	Esophageal Cancer
ACH-000718	Other	Yes		Yes	Lung Cancer
ACH-000719	Other	Yes	Yes		Ovarian Cancer
ACH-000720	Other	Yes	Yes	Yes	Bladder Cancer
ACH-000721	Other		Yes	Yes	Breast Cancer
ACH-000722	Other	Yes			Colon/Colorectal Cancer
ACH-000723	Other		Yes	Yes	Head and Neck Cancer
ACH-000724	Other	Yes	Yes	Yes	Bladder Cancer
ACH-000725	UCHL1-related	Yes		Yes	Breast Cancer
ACH-000726	Other		Yes	Yes	Esophageal Cancer
ACH-000729	UCHL1-related	Yes			Lung Cancer
ACH-000730	Other	Yes	Yes	Yes	Skin Cancer
ACH-000731	Other			Yes	Lung Cancer
ACH-000732	Other		Yes		Head and Neck Cancer
ACH-000733	Other	Yes	Yes	Yes	Lung Cancer
ACH-000734	Other		Yes	Yes	Liver Cancer
ACH-000735	Other		Yes	Yes	Head and Neck Cancer
ACH-000736	Other		Yes	Yes	Gastric Cancer
ACH-000737	UCHL1-related				Lung Cancer
ACH-000738	Other	Yes	Yes	Yes	Brain Cancer
ACH-000739	UCHL1-related		Yes	Yes	Liver Cancer
ACH-000740	Other	Yes	Yes	Yes	Head and Neck Cancer
ACH-000741	Other		Yes	Yes	Bladder Cancer
ACH-000742	Other			Yes	Fibroblast
ACH-000743	UCHL1-related	Yes			Lung Cancer
ACH-000744	Other	Yes	Yes	Yes	Lung Cancer
ACH-000746	UCHL1-related				Gastric Cancer
ACH-000747	Other	Yes	Yes	Yes	Lung Cancer
ACH-000748	Other	Yes	Yes	Yes	Bone Cancer
ACH-000749	UCHL1-related	Yes	Yes		Lung Cancer
ACH-000750	Other	Yes	Yes		Skin Cancer
ACH-000752	Other	Yes		Yes	Lung Cancer
ACH-000753	Other		Yes	Yes	Bladder Cancer
ACH-000755	Other	Yes			Breast Cancer
ACH-000756	Other	Yes	Yes	Yes	Brain Cancer
ACH-000757	Other	Yes			Lung Cancer
ACH-000758	Other		Yes	Yes	Gastric Cancer
ACH-000759	Other	Yes	Yes		Breast Cancer
ACH-000760	Other				Brain Cancer
ACH-000761	Other				Gastric Cancer
ACH-000762	Other		Yes	Yes	Head and Neck Cancer
ACH-000764	Other		Yes	Yes	Gastric Cancer
ACH-000765	Other		Yes	Yes	Skin Cancer
ACH-000766	Other	Yes	Yes		Lung Cancer
ACH-000767	UCHL1-related	Yes			Lung Cancer
ACH-000768	Other	Yes	Yes	Yes	Breast Cancer
ACH-000769	UCHL1-related	Yes	Yes	Yes	Lung Cancer
ACH-000771	Other		Yes	Yes	Head and Neck Cancer
ACH-000772	UCHL1-related	Yes			Sarcoma
ACH-000774	Other		Yes	Yes	Lung Cancer
ACH-000775	UCHL1-related	Yes	Yes	Yes	Lung Cancer
ACH-000776	Other	Yes	Yes	Yes	Brain Cancer
ACH-000777	Other		Yes	Yes	Esophageal Cancer
ACH-000778	Other	Yes	Yes	Yes	Head and Neck Cancer
ACH-000779	Other				Lung Cancer
ACH-000780	UCHL1-related	Yes			Lung Cancer
ACH-000781	Other	Yes	Yes		Lung Cancer
ACH-000783	Other	Yes	Yes	Yes	Breast Cancer
ACH-000784	UCHL1-related	Yes	Yes	Yes	Esophageal Cancer
ACH-000785	Other		Yes		Lung Cancer
ACH-000787	Other	Yes	Yes		Lung Cancer
ACH-000788	Other	Yes	Yes	Yes	Skin Cancer
ACH-000789	UCHL1-related	Yes		Yes	Lung Cancer
ACH-000790	UCHL1-related	Yes		Yes	Lung Cancer
ACH-000791	Other		Yes	Yes	Lung Cancer
ACH-000792	Other	Yes	Yes		Kidney Cancer
ACH-000793	Other	Yes		Yes	Gastric Cancer
ACH-000794	Other	Yes	Yes	Yes	Head and Neck Cancer
ACH-000796	Other		Yes	Yes	Ovarian Cancer
ACH-000797	Other				Fibroblast
ACH-000798	Other	Yes			Colon/Colorectal Cancer
ACH-000799	Other				Skin Cancer
ACH-000800	UCHL1-related	Yes	Yes	Yes	Lung Cancer
ACH-000801	Other				Skin Cancer
ACH-000802	Other	Yes	Yes		Bladder Cancer
ACH-000803	UCHL1-related	Yes	Yes	Yes	Lung Cancer
ACH-000804	UCHL1-related	Yes	Yes	Yes	Neuroblastoma
ACH-000805	Other	Yes	Yes	Yes	Skin Cancer
ACH-000807	Other				Brain Cancer
ACH-000808	Other		Yes	Yes	Bile Duct Cancer
ACH-000809	Other	Yes	Yes	Yes	Esophageal Cancer
ACH-000810	Other	Yes	Yes	Yes	Skin Cancer
ACH-000811	Other	Yes	Yes	Yes	Ovarian Cancer
ACH-000812	Other	Yes	Yes	Yes	Skin Cancer
ACH-000813	Other		Yes	Yes	Lung Cancer
ACH-000814	Other	Yes	Yes		Skin Cancer
ACH-000816	UCHL1-related	Yes			Lung Cancer
ACH-000818	Other	Yes			Breast Cancer
ACH-000819	Other	Yes	Yes	Yes	Brain Cancer
ACH-000820	UCHL1-related			Yes	Colon/Colorectal Cancer
ACH-000822	Other	Yes	Yes	Yes	Skin Cancer
ACH-000823	Other	Yes	Yes	Yes	Esophageal Cancer
ACH-000824	Other	Yes	Yes	Yes	Esophageal Cancer
ACH-000825	Other	Yes		Yes	Lung Cancer
ACH-000826	Other	Yes	Yes	Yes	Lung Cancer
ACH-000827	Other	Yes	Yes	Yes	Skin Cancer
ACH-000828	Other	Yes		Yes	Breast Cancer
ACH-000830	UCHL1-related	Yes			Lung Cancer
ACH-000831	Other			Yes	Endometrial/Uterine Cancer
ACH-000832	Other	Yes	Yes		Head and Neck Cancer
ACH-000833	Other		Yes	Yes	Sarcoma
ACH-000834	Other		Yes	Yes	Bladder Cancer
ACH-000835	Other	Yes	Yes	Yes	Sarcoma
ACH-000836	Other		Yes	Yes	Head and Neck Cancer
ACH-000837	Other		Yes	Yes	Lung Cancer
ACH-000839	Other		Yes	Yes	Bladder Cancer
ACH-000840	Other	Yes	Yes	Yes	Lung Cancer
ACH-000841	Other	Yes	Yes	Yes	Lung Cancer
ACH-000842	Other		Yes	Yes	Colon/Colorectal Cancer
ACH-000843	Other	Yes	Yes	Yes	Lung Cancer
ACH-000844	UCHL1-related				Lung Cancer
ACH-000845	Other		Yes	Yes	Lung Cancer
ACH-000846	Other	Yes	Yes	Yes	Head and Neck Cancer
ACH-000847	UCHL1-related	Yes	Yes		Gastric Cancer
ACH-000848	UCHL1-related	Yes	Yes		Liver Cancer
ACH-000849	Other	Yes	Yes	Yes	Breast Cancer
ACH-000850	Other				Fibroblast
ACH-000851	UCHL1-related			Yes	Lung Cancer
ACH-000852	Other	Yes	Yes	Yes	Lung Cancer
ACH-000853	UCHL1-related	Yes	Yes	Yes	Lung Cancer
ACH-000855	Other	Yes	Yes	Yes	Esophageal Cancer
ACH-000856	UCHL1-related	Yes	Yes	Yes	Breast Cancer
ACH-000857	Other	Yes			Breast Cancer
ACH-000858	Other	Yes	Yes	Yes	Lung Cancer
ACH-000859	Other	Yes	Yes	Yes	Breast Cancer
ACH-000860	Other	Yes	Yes	Yes	Lung Cancer
ACH-000861	Other	Yes		Yes	Lung Cancer
ACH-000862	Other		Yes	Yes	Bladder Cancer
ACH-000863	Other	Yes	Yes	Yes	Brain Cancer
ACH-000864	UCHL1-related	Yes			Endometrial/Uterine Cancer
ACH-000865	UCHL1-related	Yes		Yes	Esophageal Cancer
ACH-000866	UCHL1-related	Yes	Yes	Yes	Lung Cancer
ACH-000867	Other	Yes		Yes	Lung Cancer
ACH-000868	Other		Yes	Yes	Lung Cancer
ACH-000869	Other	Yes	Yes	Yes	Lung Cancer
ACH-000870	UCHL1-related				Lung Cancer
ACH-000871	UCHL1-related	Yes			Lung Cancer
ACH-000872	Other				Lung Cancer
ACH-000873	Other	Yes	Yes		Esophageal Cancer
ACH-000875	Other	Yes	Yes		Lung Cancer
ACH-000876	Other	Yes		Yes	Breast Cancer
ACH-000878	Other	Yes	Yes	Yes	Lung Cancer
ACH-000879	Other	Yes	Yes	Yes	Endometrial/Uterine Cancer
ACH-000880	UCHL1-related	Yes	Yes	Yes	Gastric Cancer
ACH-000881	Other	Yes	Yes		Skin Cancer
ACH-000882	Other	Yes	Yes	Yes	Skin Cancer
ACH-000883	Other	Yes	Yes		Brain Cancer
ACH-000884	Other		Yes	Yes	Skin Cancer
ACH-000885	Other	Yes	Yes	Yes	Ovarian Cancer
ACH-000886	Other	Yes	Yes		Lung Cancer
ACH-000887	Other				Brain Cancer
ACH-000888	Other	Yes	Yes	Yes	Lung Cancer
ACH-000890	Other	Yes	Yes	Yes	Lung Cancer
ACH-000891	Other		Yes	Yes	Lung Cancer
ACH-000892	Other	Yes	Yes	Yes	Lung Cancer
ACH-000893	Other	Yes	Yes	Yes	Lung Cancer
ACH-000894	Other	Yes		Yes	Lung Cancer
ACH-000895	UCHL1-related	Yes	Yes	Yes	Colon/Colorectal Cancer
ACH-000896	Other	Yes	Yes	Yes	Bladder Cancer
ACH-000897	Other		Yes	Yes	Thyroid Cancer
ACH-000898	Other		Yes	Yes	Gastric Cancer
ACH-000899	Other		Yes	Yes	Skin Cancer
ACH-000900	Other	Yes	Yes	Yes	Lung Cancer
ACH-000901	Other		Yes		Lung Cancer
ACH-000902	Other	Yes		Yes	Breast Cancer
ACH-000903	Other	Yes	Yes	Yes	Thyroid Cancer
ACH-000904	UCHL1-related				Lung Cancer
ACH-000905	Other	Yes	Yes	Yes	Bladder Cancer
ACH-000906	Other	Yes	Yes	Yes	Ovarian Cancer
ACH-000907	Other				Kidney Cancer
ACH-000908	UCHL1-related				Gastric Cancer
ACH-000909	Other		Yes	Yes	Endometrial/Uterine Cancer
ACH-000910	UCHL1-related	Yes		Yes	Breast Cancer
ACH-000911	Other	Yes	Yes	Yes	Gastric Cancer
ACH-000912	Other			Yes	Lung Cancer
ACH-000913	Other	Yes	Yes	Yes	Endometrial/Uterine Cancer
ACH-000915	Other	Yes	Yes	Yes	Skin Cancer
ACH-000916	Other	Yes	Yes	Yes	Lung Cancer
ACH-000917	Other	Yes	Yes	Yes	Esophageal Cancer
ACH-000919	UCHL1-related	Yes	Yes	Yes	Gastric Cancer
ACH-000921	Other		Yes	Yes	Lung Cancer
ACH-000924	Other	Yes	Yes		Lung Cancer
ACH-000925	UCHL1-related				Lung Cancer
ACH-000926	Other	Yes	Yes	Yes	Colon/Colorectal Cancer
ACH-000927	UCHL1-related	Yes	Yes	Yes	Breast Cancer
ACH-000928	Other			Yes	Endometrial/Uterine Cancer
ACH-000929	Other	Yes	Yes	Yes	Lung Cancer
ACH-000930	Other	Yes		Yes	Breast Cancer
ACH-000931	UCHL1-related			Yes	Skin Cancer
ACH-000932	UCHL1-related	Yes			Gastric Cancer
ACH-000933	Other				Pancreatic Cancer
ACH-000934	Other	Yes	Yes	Yes	Breast Cancer
ACH-000935	Other	Yes			Colon/Colorectal Cancer
ACH-000936	Other	Yes	Yes	Yes	Ovarian Cancer
ACH-000939	Other	Yes	Yes	Yes	Sarcoma
ACH-000940	UCHL1-related	Yes	Yes	Yes	Endometrial/Uterine Cancer
ACH-000941	Other		Yes	Yes	Endometrial/Uterine Cancer
ACH-000943	UCHL1-related	Yes	Yes	Yes	Colon/Colorectal Cancer
ACH-000945	Other	Yes	Yes	Yes	Lung Cancer
ACH-000946	Other		Yes	Yes	Endometrial/Uterine Cancer
ACH-000947	UCHL1-related	Yes	Yes	Yes	Ovarian Cancer
ACH-000948	Other	Yes	Yes		Gastric Cancer
ACH-000949	UCHL1-related	Yes			Gastric Cancer
ACH-000950	UCHL1-related	Yes	Yes	Yes	Colon/Colorectal Cancer
ACH-000951	Other	Yes		Yes	Lung Cancer
ACH-000952	UCHL1-related				Prostate Cancer
ACH-000954	Other		Yes	Yes	Endometrial/Uterine Cancer
ACH-000955	UCHL1-related	Yes	Yes	Yes	Colon/Colorectal Cancer
ACH-000956	UCHL1-related	Yes	Yes	Yes	Prostate Cancer
ACH-000957	UCHL1-related	Yes	Yes	Yes	Colon/Colorectal Cancer
ACH-000958	UCHL1-related	Yes	Yes	Yes	Colon/Colorectal Cancer
ACH-000959	UCHL1-related		Yes	Yes	Colon/Colorectal Cancer
ACH-000961	UCHL1-related		Yes		Endometrial/Uterine Cancer
ACH-000962	Other	Yes	Yes	Yes	Ovarian Cancer
ACH-000963	UCHL1-related	Yes	Yes		Colon/Colorectal Cancer
ACH-000965	Other	Yes	Yes	Yes	Endometrial/Uterine Cancer
ACH-000966	Other	Yes	Yes	Yes	Ovarian Cancer
ACH-000967	Other		Yes	Yes	Colon/Colorectal Cancer
ACH-000968	Other	Yes	Yes		Skin Cancer
ACH-000969	UCHL1-related	Yes			Colon/Colorectal Cancer
ACH-000970	Other	Yes	Yes	Yes	Colon/Colorectal Cancer
ACH-000971	UCHL1-related	Yes	Yes		Colon/Colorectal Cancer
ACH-000972	Other		Yes	Yes	Endometrial/Uterine Cancer
ACH-000973	Other	Yes	Yes		Bladder Cancer
ACH-000974	Other	Yes	Yes	Yes	Endometrial/Uterine Cancer
ACH-000975	Other				Lung Cancer
ACH-000976	Other	Yes	Yes		Bile Duct Cancer
ACH-000977	UCHL1-related	Yes	Yes		Prostate Cancer
ACH-000978	UCHL1-related	Yes	Yes		Endometrial/Uterine Cancer
ACH-000980	UCHL1-related	Yes			Lung Cancer
ACH-000982	UCHL1-related		Yes	Yes	Colon/Colorectal Cancer
ACH-000984	UCHL1-related		Yes	Yes	Endometrial/Uterine Cancer
ACH-000985	UCHL1-related	Yes	Yes	Yes	Colon/Colorectal Cancer
ACH-000986	Other	Yes	Yes	Yes	Colon/Colorectal Cancer
ACH-000987	Other	Yes	Yes	Yes	Skin Cancer
ACH-000988	Other	Yes	Yes	Yes	Endometrial/Uterine Cancer
ACH-000989	UCHL1-related	Yes		Yes	Colon/Colorectal Cancer
ACH-000990	Other		Yes	Yes	Endometrial/Uterine Cancer
ACH-000991	UCHL1-related	Yes	Yes	Yes	Colon/Colorectal Cancer
ACH-000993	Other				Endometrial/Uterine Cancer
ACH-000994	UCHL1-related		Yes	Yes	Endometrial/Uterine Cancer
ACH-000996	UCHL1-related		Yes	Yes	Endometrial/Uterine Cancer
ACH-000997	UCHL1-related	Yes	Yes	Yes	Colon/Colorectal Cancer
ACH-000998	UCHL1-related	Yes	Yes	Yes	Colon/Colorectal Cancer
ACH-000999	UCHL1-related	Yes			Colon/Colorectal Cancer
ACH-001001	Other				Bone Cancer
ACH-001016	Other	Yes	Yes	Yes	Brain Cancer
ACH-001020	UCHL1-related				Rhabdoid
ACH-001022	UCHL1-related		Yes		Bone Cancer
ACH-001028	Other				Rhabdoid
ACH-001029	UCHL1-related		Yes		Bone Cancer
ACH-001030	UCHL1-related				Bone Cancer
ACH-001031	UCHL1-related				Rhabdoid
ACH-001032	UCHL1-related				Bone Cancer
ACH-001033	Other				Bone Cancer
ACH-001034	Other				Bone Cancer
ACH-001035	Other				Bone Cancer
ACH-001038	Other				Bone Cancer
ACH-001041	UCHL1-related			Yes	Lung Cancer
ACH-001048	Other				Ovarian Cancer
ACH-001050	Other				Sarcoma
ACH-001053	UCHL1-related				Brain Cancer
ACH-001054	UCHL1-related				Brain Cancer
ACH-001059	UCHL1-related				Rhabdoid
ACH-001061	Other			Yes	Colon/Colorectal Cancer
ACH-001067	Other				Brain Cancer
ACH-001075	Other	Yes	Yes	Yes	Lung Cancer
ACH-001078	Other			Yes	Lung Cancer
ACH-001086	Other	Yes			Cervical Cancer
ACH-001096	UCHL1-related				Sarcoma
ACH-001098	Other				Pancreatic Cancer
ACH-001099	Other		Yes		Rhabdoid
ACH-001109	Other				Rhabdoid
ACH-001113	UCHL1-related		Yes	Yes	Lung Cancer
ACH-001128	Other		Yes		Rhabdoid
ACH-001145	Other		Yes		Ovarian Cancer
ACH-001151	Other	Yes		Yes	Ovarian Cancer
ACH-001163	Other		Yes		Kidney Cancer
ACH-001164	Other		Yes		Sarcoma
ACH-001172	Other				Brain Cancer
ACH-001173	Other				Brain Cancer
ACH-001183	Other				Bladder Cancer
ACH-001184	UCHL1-related				Sarcoma
ACH-001190	Other	Yes	Yes	Yes	Skin Cancer
ACH-001192	UCHL1-related		Yes		Bone Cancer
ACH-001193	UCHL1-related	Yes	Yes		Bone Cancer
ACH-001194	Other				Kidney Cancer
ACH-001196	UCHL1-related				Sarcoma
ACH-001200	UCHL1-related		Yes		Rhabdoid
ACH-001201	UCHL1-related				Brain Cancer
ACH-001207	Other				Fibroblast
ACH-001210	UCHL1-related		Yes		Rhabdoid
ACH-001211	UCHL1-related		Yes		Rhabdoid
ACH-001212	UCHL1-related		Yes		Rhabdoid
ACH-001228	UCHL1-related				Head and Neck Cancer
ACH-001229	Other				Head and Neck Cancer
ACH-001232	Other				Brain Cancer
ACH-001239	Other		Yes	Yes	Skin Cancer
ACH-001270	Other				Sarcoma
ACH-001274	Other	Yes			Sarcoma
ACH-001275	UCHL1-related				Sarcoma
ACH-001277	UCHL1-related				Sarcoma
ACH-001278	UCHL1-related				Ovarian Cancer
ACH-001279	UCHL1-related				Ovarian Cancer
ACH-001280	UCHL1-related				Sarcoma
ACH-001283	UCHL1-related				Bone Cancer
ACH-001289	UCHL1-related				Rhabdoid
ACH-001295	UCHL1-related				Eye Cancer
ACH-001300	Other				Neuroblastoma
ACH-001301	UCHL1-related				Neuroblastoma
ACH-001302	UCHL1-related				Neuroblastoma
ACH-001303	UCHL1-related				Neuroblastoma
ACH-001306	Other	Yes	Yes		Thyroid Cancer
ACH-001307	Other	Yes	Yes	Yes	Thyroid Cancer
ACH-001318	Other		Yes	Yes	Liver Cancer
ACH-001321	Other		Yes		Thyroid Cancer
ACH-001322	UCHL1-related				Sarcoma
ACH-001328	Other	Yes			Skin Cancer
ACH-001329	Other				Brain Cancer
ACH-001332	Other	Yes			Head and Neck Cancer
ACH-001333	UCHL1-related	Yes			Cervical Cancer
ACH-001334	Other	Yes			Cervical Cancer
ACH-001335	Other				Cervical Cancer
ACH-001336	Other	Yes			Cervical Cancer
ACH-001339	Other				Skin Cancer
ACH-001340	Other				Ovarian Cancer
ACH-001341	UCHL1-related	Yes			Cervical Cancer
ACH-001344	Other	Yes			Neuroblastoma
ACH-001345	UCHL1-related	Yes			Colon/Colorectal Cancer
ACH-001346	Other				Head and Neck Cancer
ACH-001347	Other				Head and Neck Cancer
ACH-001353	Other				Pancreatic Cancer
ACH-001354	UCHL1-related				Neuroblastoma
ACH-001356	Other				Thyroid Cancer
ACH-001360	Other	Yes			Cervical Cancer
ACH-001366	UCHL1-related				Neuroblastoma
ACH-001367	UCHL1-related				Neuroblastoma
ACH-001368	Other	Yes			Esophageal Cancer
ACH-001369	Other				Ovarian Cancer
ACH-001370	Other				Ovarian Cancer
ACH-001373	Other	Yes			Ovarian Cancer
ACH-001374	UCHL1-related	Yes			Ovarian Cancer
ACH-001375	Other				Pancreatic Cancer
ACH-001376	Other				Pancreatic Cancer
ACH-001377	UCHL1-related				Pancreatic Cancer
ACH-001378	Other				Pancreatic Cancer
ACH-001379	Other				Pancreatic Cancer
ACH-001380	Other				Pancreatic Cancer
ACH-001382	Other				Pancreatic Cancer
ACH-001384	Other	Yes			Thyroid Cancer
ACH-001385	Other	Yes			Head and Neck Cancer
ACH-001386	UCHL1-related				Lung Cancer
ACH-001388	Other				Breast Cancer
ACH-001389	Other				Breast Cancer
ACH-001390	Other				Breast Cancer
ACH-001391	Other				Breast Cancer
ACH-001392	Other				Breast Cancer
ACH-001394	Other				Breast Cancer
ACH-001395	Other				Breast Cancer
ACH-001396	Other				Breast Cancer
ACH-001398	Other	Yes			Kidney Cancer
ACH-001399	Other	Yes			Colon/Colorectal Cancer
ACH-001400	Other	Yes			Cervical Cancer
ACH-001401	UCHL1-related	Yes			Adrenal Cancer
ACH-001402	Other	Yes			Cervical Cancer
ACH-001403	Other				Ovarian Cancer
ACH-001407	Other				Bladder Cancer
ACH-001408	Other				Bladder Cancer
ACH-001409	Other				Bladder Cancer
ACH-001410	UCHL1-related				Bladder Cancer
ACH-001411	Other				Bladder Cancer
ACH-001412	Other				Bladder Cancer
ACH-001413	Other				Bladder Cancer
ACH-001414	Other				Bladder Cancer
ACH-001415	Other				Bladder Cancer
ACH-001416	Other				Bladder Cancer
ACH-001418	Other	Yes			Ovarian Cancer
ACH-001419	Other				Breast Cancer
ACH-001421	UCHL1-related				Eye Cancer
ACH-001422	Other				Prostate Cancer
ACH-001430	UCHL1-related				Bone Cancer
ACH-001431	UCHL1-related				Bone Cancer
ACH-001433	Other				Sarcoma
ACH-001441	Other				Eye Cancer
ACH-001442	Other	Yes			Skin Cancer
ACH-001443	Other	Yes			Thyroid Cancer
ACH-001451	Other				Cervical Cancer
ACH-001453	Other	Yes			Prostate Cancer
ACH-001454	Other				Colon/Colorectal Cancer
ACH-001456	Other				Colon/Colorectal Cancer
ACH-001458	Other				Colon/Colorectal Cancer
ACH-001459	Other				Colon/Colorectal Cancer
ACH-001460	Other				Colon/Colorectal Cancer
ACH-001461	Other				Colon/Colorectal Cancer
ACH-001494	Other	Yes			Bile Duct Cancer
ACH-001495	Other				Endometrial/Uterine Cancer
ACH-001496	Other	Yes			Esophageal Cancer
ACH-001497	Other	Yes			Esophageal Cancer
ACH-001500	Other	Yes			Esophageal Cancer
ACH-001509	Other				Head and Neck Cancer
ACH-001510	Other				Head and Neck Cancer
ACH-001511	Other				Head and Neck Cancer
ACH-001513	Other				Cervical Cancer
ACH-001515	Other				Cervical Cancer
ACH-001516	UCHL1-related				Cervical Cancer
ACH-001517	UCHL1-related	Yes			Endometrial/Uterine Cancer
ACH-001518	Other				Endometrial/Uterine Cancer
ACH-001519	UCHL1-related	Yes			Bone Cancer
ACH-001521	Other				Skin Cancer
ACH-001522	Other				Skin Cancer
ACH-001523	Other				Skin Cancer
ACH-001524	Other				Skin Cancer
ACH-001525	Other	Yes			Cervical Cancer
ACH-001526	Other	Yes			Bone Cancer
ACH-001528	Other	Yes			Thyroid Cancer
ACH-001529	Other	Yes			Endometrial/Uterine Cancer
ACH-001530	Other	Yes			Endometrial/Uterine Cancer
ACH-001532	UCHL1-related				Rhabdoid
ACH-001536	Other				Bile Duct Cancer
ACH-001538	Other				Bile Duct Cancer
ACH-001540	Other				Liposarcoma
ACH-001542	Other	Yes			Head and Neck Cancer
ACH-001543	Other				Head and Neck Cancer
ACH-001548	UCHL1-related				Neuroblastoma
ACH-001549	Other	Yes			Lung Cancer
ACH-001550	Other				Skin Cancer
ACH-001551	Other				Skin Cancer
ACH-001552	Other				Skin Cancer
ACH-001554	Other				Eye Cancer
ACH-001555	Other				Lung Cancer
ACH-001556	Other				Lung Cancer
ACH-001557	Other				Lung Cancer
ACH-001558	Other				Lung Cancer
ACH-001559	Other				Lung Cancer
ACH-001560	Other				Lung Cancer
ACH-001561	Other				Lung Cancer
ACH-001562	Other				Lung Cancer
ACH-001563	Other				Skin Cancer
ACH-001566	Other				Skin Cancer
ACH-001567	Other				Skin Cancer
ACH-001568	Other				Skin Cancer
ACH-001569	Other				Skin Cancer
ACH-001570	Other				Skin Cancer
ACH-001603	UCHL1-related	Yes			Neuroblastoma
ACH-001605	Other	Yes			Brain Cancer
ACH-001607	Other				Gallbladder Cancer
ACH-001608	Other				Brain Cancer
ACH-001609	Other				Brain Cancer
ACH-001610	Other				Brain Cancer
ACH-001611	Other				Brain Cancer
ACH-001619	Other				Gallbladder Cancer
ACH-001622	Other				Brain Cancer
ACH-001623	Other				Brain Cancer
ACH-001624	Other				Brain Cancer
ACH-001625	Other	Yes			Head and Neck Cancer
ACH-001626	Other	Yes			Head and Neck Cancer
ACH-001627	Other				Prostate Cancer
ACH-001628	Other				Ovarian Cancer
ACH-001630	Other	Yes			Ovarian Cancer
ACH-001632	Other				Ovarian Cancer
ACH-001645	Other				Skin Cancer
ACH-001648	Other				Prostate Cancer
ACH-001649	Other				Prostate Cancer
ACH-001650	Other	Yes			Cervical Cancer
ACH-001651	Other				Endometrial/Uterine Cancer
ACH-001652	Other				Endometrial/Uterine Cancer
ACH-001653	Other	Yes			Gastric Cancer
ACH-001654	Other	Yes			Esophageal Cancer
ACH-001655	Other	Yes			Endometrial/Uterine Cancer
ACH-001664	UCHL1-related				Gastric Cancer
ACH-001668	UCHL1-related				Teratoma
ACH-001670	UCHL1-related				Brain Cancer
ACH-001673	Other				Bile Duct Cancer
ACH-001674	UCHL1-related	Yes			Neuroblastoma
ACH-001687	Other				Kidney Cancer
ACH-001688	Other				Kidney Cancer
ACH-001690	Other				Head and Neck Cancer
ACH-001692	Other				Head and Neck Cancer
ACH-001694	Other				Head and Neck Cancer
ACH-001698	Other				Head and Neck Cancer
ACH-001699	Other				Head and Neck Cancer
ACH-001702	UCHL1-related	Yes			Sarcoma
ACH-001711	Other	Yes			Brain Cancer
ACH-001712	Other				Bone Cancer
ACH-001715	Other	Yes			Bone Cancer
ACH-001716	UCHL1-related	Yes			Neuroblastoma
ACH-001719	UCHL1-related				Ovarian Cancer
ACH-001740	UCHL1-related				Sarcoma
ACH-001741	UCHL1-related				Sarcoma
ACH-001743	UCHL1-related				Sarcoma
ACH-001745	UCHL1-related				Sarcoma
ACH-001750	Other				Sarcoma
ACH-001751	UCHL1-related				Sarcoma
ACH-001765	UCHL1-related				Sarcoma
ACH-001786	Other				Colon/Colorectal Cancer
ACH-001790	UCHL1-related				Sarcoma
ACH-001791	Other				Liposarcoma
ACH-001793	Other				Liposarcoma
ACH-001794	Other				Liposarcoma
ACH-001795	Other				Liposarcoma
ACH-001796	Other				Liposarcoma
ACH-001799	Other				Liposarcoma
ACH-001802	Other				Liposarcoma
ACH-001804	Other				Liposarcoma
ACH-001807	Other				Liposarcoma
ACH-001814	Other				Bone Cancer
ACH-001818	Other				Bone Cancer
ACH-001819	UCHL1-related				Breast Cancer
ACH-001820	UCHL1-related				Breast Cancer
ACH-001834	Other				Bile Duct Cancer
ACH-001835	Other				Bile Duct Cancer
ACH-001836	Other				Bile Duct Cancer
ACH-001838	Other				Bile Duct Cancer
ACH-001839	Other				Bile Duct Cancer
ACH-001841	Other				Bile Duct Cancer
ACH-001842	Other				Bile Duct Cancer
ACH-001843	Other				Bile Duct Cancer
ACH-001844	Other				Bile Duct Cancer
ACH-001845	Other				Bile Duct Cancer
ACH-001846	Other				Bile Duct Cancer
ACH-001848	Other				Bile Duct Cancer
ACH-001849	Other				Bile Duct Cancer
ACH-001850	Other				Gallbladder Cancer
ACH-001852	Other				Bile Duct Cancer
ACH-001853	Other				Bile Duct Cancer
ACH-001856	Other				Bile Duct Cancer
ACH-001857	Other				Bile Duct Cancer
ACH-001858	Other				Bile Duct Cancer
ACH-001861	Other				Gallbladder Cancer
ACH-001862	Other				Bile Duct Cancer
ACH-001863	Other				Bile Duct Cancer
ACH-001864	Other				Bile Duct Cancer
ACH-001959	UCHL1-related				Bile Duct Cancer
ACH-001960	UCHL1-related				Bile Duct Cancer
ACH-001961	Other				Gallbladder Cancer
ACH-001991	UCHL1-related				Ovarian Cancer
ACH-001997	Other				Bile Duct Cancer
ACH-001999	Other				Pancreatic Cancer
ACH-002001	Other				Skin Cancer
ACH-002002	Other				Skin Cancer
ACH-002003	Other				Skin Cancer
ACH-002004	Other				Skin Cancer
ACH-002005	Other				Skin Cancer
ACH-002011	Other				Eye Cancer
ACH-002015	Other				Eye Cancer
ACH-002016	Other				Eye Cancer
ACH-002017	UCHL1-related				Eye Cancer
ACH-002018	UCHL1-related				Eye Cancer
ACH-002019	Other				Cervical Cancer
ACH-002022	Other				Colon/Colorectal Cancer
ACH-002023	Other				Colon/Colorectal Cancer
ACH-002024	UCHL1-related				Colon/Colorectal Cancer
ACH-002025	Other				Colon/Colorectal Cancer
ACH-002026	Other				Endometrial/Uterine Cancer
ACH-002027	Other				Endometrial/Uterine Cancer
ACH-002029	Other				Head and Neck Cancer
ACH-002038	UCHL1-related				Ovarian Cancer
ACH-002039	Other				Pancreatic Cancer
ACH-002041	Other				Thyroid Cancer
ACH-002042	Other				Thyroid Cancer
ACH-002044	UCHL1-related				Head and Neck Cancer
ACH-002045	Other				Head and Neck Cancer
ACH-002046	Other				Endometrial/Uterine Cancer
ACH-002065	Other				Sarcoma
ACH-002066	Other				Sarcoma
ACH-002067	Other				Bone Cancer
ACH-002069	Other				Bone Cancer
ACH-002446	Other				Gastric Cancer
ACH-002458	Other				Skin Cancer
ACH-002459	Other				Skin Cancer
ACH-002460	Other				Skin Cancer
ACH-002461	Other				Skin Cancer
ACH-002508	Other				Skin Cancer
ACH-002509	Other				Skin Cancer
ACH-002510	Other				Skin Cancer
ACH-002511	Other				Skin Cancer

## Sheet: Suppl. Table S5
Supplemental Table S5: Association of UCHL1 transcription with clinical and histopathological variables for TCGA-HNSC
		UCHL1 high		UCHL1 moderate		UCHL1 low
Feature	Categories	n		n		n		p-value 2
Sex	Female	23	0.184	64	0.257	45	0.36	0.006426259
	Male	102	0.816	185	0.743	80	0.64
Smoking	No	13	0.107	57	0.235	40	0.32	0.0003050498
	Yes	108	0.893	186	0.765	85	0.68
Alcohol	No	31	0.258	75	0.306	50	0.407	0.03787241
	Yes	89	0.742	170	0.694	73	0.593
HPV16 1	No	100	0.862	207	0.873	116	0.943	0.07933487
	Yes	16	0.138	30	0.127	7	0.057
Subsite	Hypopharynx&Larynx	48	0.384	55	0.221	18	0.144	0.322827
	Oral Cavity	53	0.424	156	0.627	98	0.784
	Oropharynx	24	0.192	38	0.153	9	0.072
Age	<50y	20	0.16	54	0.218	14	0.112	0.0003017416
	50-70y	89	0.712	147	0.593	70	0.56
	>70y	16	0.128	47	0.19	41	0.328
Resection Margin	Negative	87	0.784	172	0.775	82	0.719	0.1126449
	Close	8	0.072	21	0.095	20	0.175
	Positive	16	0.144	29	0.131	12	0.105
Lymphnode status	pN0	34	0.337	83	0.409	54	0.529	0.01841845
	pN+	67	0.663	120	0.591	48	0.471
Extracapsular spread	No	49	0.845	115	0.833	71	0.947	0.05676934
	Yes	9	0.155	23	0.167	4	0.053
Pathological grading	G1	5	0.043	23	0.095	33	0.266	7.22197e-06
	G2	80	0.696	150	0.622	68	0.548
	G3	30	0.261	66	0.274	23	0.185
	G4	0	0	2	0.008	0	0
Angiolymphatic invasion	No	45	0.542	112	0.659	62	0.729	0.03629508
	Yes	38	0.458	58	0.341	23	0.271
Perineural invasion	No	52	0.565	83	0.483	51	0.593	0.1843565
	Yes	40	0.435	89	0.517	35	0.407
1 Cao, S. et al. Divergent viral presentation among human tumors and adjacent normal tissues. Sci. Rep. 6, 28294; (2016)
2 Chi-square test, significant p-values (<0.05) are indicated in bold
3 p = pathological

## Sheet: Suppl. Table S6
Supplemental Table S6: Number and relative frequency of UCHL1-related and other solid tumors from TCGA
Cancer Type	Prediction	N	Frequency		Radiotherapy	N	Frequency
ACC	Other	69	0.873418		No	59	0.746835
	UCHL1-related	10	0.126582		Yes	17	0.21519
BLCA	Other	303	0.742647		No	366	0.881928
	UCHL1-related	105	0.257353		Yes	20	0.0481928
BRCA	Other	942	0.860274		No	443	0.403461
	UCHL1-related	153	0.139726		Yes	556	0.506375
CESC	Other	223	0.733553		No	75	0.229358
	UCHL1-related	81	0.266447		Yes	160	0.489297
CHOL	Other	29	0.805556		No	36	0.972973
	UCHL1-related	7	0.194444		Yes	0	0
COAD	Other	375	0.835189		No	381	0.822894
	UCHL1-related	74	0.164811		Yes	10	0.0215983
DLBC	Other	39	0.8125		No	39	0.8125
	UCHL1-related	9	0.1875		Yes	7	0.145833
ESCA	Other	136	0.73913		No	114	0.609626
	UCHL1-related	48	0.26087		Yes	41	0.219251
GBM	Other	124	0.810458		No	23	0.139394
	UCHL1-related	29	0.189542		Yes	134	0.812121
HNSC	Other	351	0.681553		No	161	0.297597
	UCHL1-related	164	0.318447		Yes	305	0.563771
KICH	Other	60	0.909091		No	66	1
	UCHL1-related	6	0.0909091		Yes	0	0
KIRC	Other	455	0.853659		No	143	0.26729
	UCHL1-related	78	0.146341		Yes	2	0.00373832
KIRP	Other	247	0.851724		No	202	0.694158
	UCHL1-related	43	0.148276		Yes	1	0.00343643
LGG	Other	403	0.782524		No	187	0.361702
	UCHL1-related	112	0.217476		Yes	298	0.576402
LIHC	Other	323	0.87062		No	335	0.900538
	UCHL1-related	48	0.12938		Yes	8	0.0215054
LUAD	Other	430	0.834951		No	408	0.787645
	UCHL1-related	85	0.165049		Yes	62	0.119691
LUSC	Other	373	0.744511		No	388	0.765286
	UCHL1-related	128	0.255489		Yes	53	0.104536
MESO	Other	71	0.816092		No	58	0.666667
	UCHL1-related	16	0.183908		Yes	23	0.264368
OV	Other	235	0.773026		No	290	0.95082
	UCHL1-related	69	0.226974		Yes	2	0.00655738
PAAD	Other	148	0.831461		No	121	0.672222
	UCHL1-related	30	0.168539		Yes	43	0.238889
PCPG	Other	147	0.821229		No	171	0.955307
	UCHL1-related	32	0.178771		Yes	5	0.027933
PRAD	Other	434	0.873239		No	394	0.789579
	UCHL1-related	63	0.126761		Yes	59	0.118236
READ	Other	139	0.874214		No	110	0.68323
	UCHL1-related	20	0.125786		Yes	20	0.124224
SARC	Other	206	0.795367		No	178	0.687259
	UCHL1-related	53	0.204633		Yes	70	0.27027
SKCM	Other	86	0.834951		No	104	0.962963
	UCHL1-related	17	0.165049		Yes	3	0.0277778
STAD	Other	339	0.816867		No	314	0.735363
	UCHL1-related	76	0.183133		Yes	73	0.17096
TGCT	Other	112	0.835821		No	110	0.820896
	UCHL1-related	22	0.164179		Yes	21	0.156716
THCA	Other	404	0.8		No	181	0.357708
	UCHL1-related	101	0.2		Yes	299	0.590909
THYM	Other	107	0.891667		No	78	0.65
	UCHL1-related	13	0.108333		Yes	42	0.35
UCEC	Other	454	0.853383		No	346	0.540625
	UCHL1-related	78	0.146617		Yes	266	0.415625
UCS	Other	45	0.789474		No	30	0.508475
	UCHL1-related	12	0.210526		Yes	27	0.457627
UVM	Other	66	0.825		No	76	0.95
	UCHL1-related	14	0.175		Yes	3	0.0375

## Sheet: Suppl. Table S7
Supplemental Table S7: In silico drug sensitivity screening for UCHL1-related vs. other cancer cells based on GDSC or PRISM projects
	GDSC		PRSIM
Drug	mean difference (UCHL1-related vs. others)	p-value	mean difference (UCHL1-related vs. others)	p-value	mode of action
OXALIPLATIN	-0.734791	5.33074e-16	-0.52232	1.62669e-05	DNA damaging agent
ABT-737	-0.614568	6.05848e-08	-0.0532333	0.433693	BCL inhibitor
AMUVATINIB	-0.599795	1.17896e-13	-0.210512	0.00731554	Kinase inhibitor
NIRAPARIB	-0.573843	9.66846e-09	-0.210521	0.00175953	PARP inhibitor
ALISERTIB	-0.571191	2.66409e-11	-0.226192	0.103527	Aurora kinase inhibitor
RIBOCICLIB	-0.571183	0.234703	0.0426374	0.716138	CDK inhibitor
PCI-34051	-0.570951	3.1691e-08	-0.00766542	0.75212	HDAC inhibitor
ACY-1215	-0.560047	9.7912e-11	-0.209382	0.0126229	HDAC inhibitor
VORINOSTAT	-0.549452	2.32015e-12	-0.389648	0.0191938	HDAC inhibitor
VENETOCLAX	-0.547276	4.9522e-10	-0.0141433	0.756611	BCL inhibitor
FULVESTRANT	-0.54555	9.20281e-09	-0.0369995	0.778359	estrogen receptor antagonist
EPZ004777	-0.53734	3.91719e-08	-0.00139265	0.604184	histone lysine methyltransferase inhibitor
MK-1775	-0.534672	8.53961e-08	0.193972	0.181076	Kinase inhibitor
NAVITOCLAX	-0.532109	5.68671e-08	0.0252884	0.951939	BCL inhibitor
GSK2110183	-0.499322	5.98303e-06	-0.385295	0.00027701	PI3K-AKT-mTOR inhibitor
GDC-0068	-0.497909	7.17826e-06	-0.368265	0.000972322	PI3K-AKT-mTOR inhibitor
CARMUSTINE	-0.495783	2.13934e-06	-0.0203582	0.492243	DNA damaging agent
TRICHOSTATIN-A	-0.494042	8.88415e-10	0.112798	0.436831	HDAC inhibitor
SORAFENIB	-0.488093	1.25885e-06	-0.0810132	0.0557499	Kinase inhibitor
GDC-0810	-0.486232	5.89436e-06	-0.00827896	0.631047	selective estrogen receptor destabilizer
VINCRISTINE	-0.48452	4.175e-06	-0.124853	0.330987	tubulin polymerization inhibitor
SU-11274	-0.48405	3.98155e-07	0.0617129	0.203066	Kinase inhibitor
NVP-ADW742	-0.48373	1.88165e-05	-0.126598	0.0354303	insulin growth factor receptor inhibitor
IRINOTECAN	-0.483546	6.65683e-07	0.0644812	0.665267	DNA damaging agent
AZD5363	-0.483392	2.06282e-05	-0.352467	0.000467607	PI3K-AKT-mTOR inhibitor
AGI-6780	-0.478307	7.38925e-09	-0.0501241	0.160587	isocitrate dehydrogenase inhibitor
AGI-5198	-0.472977	5.38818e-06	0.0147946	0.882539	isocitrate dehydrogenase inhibitor
AZD4547	-0.4691	5.24279e-05	0.00761077	0.777096	FGFR inhibitor
CYCLOPHOSPHAMIDE	-0.466401	5.47153e-07	-0.0399294	0.117819	DNA damaging agent
BIBR-1532	-0.45834	5.4351e-06	0.0995319	0.071506	telomerase inhibitor
BUPARLISIB	-0.457661	2.5023e-05	0.0433887	0.939648	PI3K-AKT-mTOR inhibitor
GSK1070916	-0.457016	2.46253e-06	-0.111105	0.469479	Aurora kinase inhibitor
BRIVANIB	-0.455838	5.13038e-07	-0.0440788	0.563703	Kinase inhibitor
BX-912	-0.455679	1.65664e-06	-0.184158	0.105994	pyruvate dehydrogenase kinase inhibitor
NSC-319726	-0.454021	2.24531e-06	0.0781965	0.773915	p53 activator
DINACICLIB	-0.435492	3.10523e-06	0.16708	0.23474	CDK inhibitor
BMS-345541	-0.433015	2.84848e-08	-0.28994	0.00535304	IKK inhibitor
CRIZOTINIB	-0.427478	3.24181e-06	-0.309171	0.00221368	ALK tyrosine kinase receptor inhibitor
P22077	-0.42723	2.36603e-05	-0.0914837	0.608003	ubiquitin specific protease inhibitor
CX-5461	-0.426441	8.98625e-06	-0.196163	0.0539785	RNA polymerase inhibitor
LEFLUNOMIDE	-0.419732	1.84465e-06	-0.0569155	0.331923	dihydroorotate dehydrogenase inhibitor, PDGFR tyrosine kinase receptor inhibitor
ALPELISIB	-0.417317	0.000111349	-0.09308	0.231818	PI3K-AKT-mTOR inhibitor
PODOPHYLLOTOXIN	-0.416843	8.80702e-05	-0.115058	0.401014	microtubule inhibitor, tubulin polymerization inhibitor
CEDIRANIB	-0.415965	0.000249887	-0.0628302	0.307825	Kinase inhibitor
TAK-715	-0.415309	1.14479e-05	-0.0295869	0.437378	p38 MAPK inhibitor
EPIRUBICIN	-0.411903	0.000149114	0.394827	0.0206409	DNA damaging agent
PD-173074	-0.404943	2.6295e-05	-0.0799682	0.473769	Kinase inhibitor
EPZ-5676	-0.403592	4.59377e-06	-0.091389	0.043179	histone lysine methyltransferase inhibitor
UPROSERTIB	-0.401452	7.22777e-05	0.068152	0.556958	PI3K-AKT-mTOR inhibitor
GW-2580	-0.398057	0.000227137	-0.0438446	0.14022	cFMS kinase inhibitor
PANOBINOSTAT	-0.394726	2.76976e-08	0.120895	0.24587	HDAC inhibitor
FILANESIB	-0.385152	4.15833e-05	0.269659	0.100204	kinesin inhibitor, kinesin-like spindle protein inhibitor
AXITINIB	-0.375304	6.4327e-06	-0.394938	0.000159539	Kinase inhibitor
5-FLUOROURACIL	-0.374142	7.95877e-06	-0.117704	0.223132	thymidylate synthase inhibitor
VE-821	-0.368054	0.000529329	-0.147911	0.0353401	ATR kinase inhibitor
QUIZARTINIB	-0.367521	5.60523e-08	-0.160783	0.0387795	FLT3 inhibitor
CAMPTOTHECIN	-0.366213	5.55409e-05	0.244372	0.074013	DNA damaging agent
TENIPOSIDE	-0.362767	0.000644824	-0.00994163	0.816013	DNA damaging agent
NELARABINE	-0.356702	1.05114e-06	0.0396519	0.444309	DNA synthesis inhibitor, T cell inhibitor
IKK-2-INHIBITOR-V	-0.356394	0.000300915	-0.0949796	0.352674	IKK inhibitor, NFkB pathway inhibitor
LGK-974	-0.352902	1.51925e-05	-0.163527	0.00248971	porcupine inhibitor
YM-201636	-0.352239	6.34801e-05	-0.1716	0.0887975	PI3K-AKT-mTOR inhibitor
TORIN-2	-0.351894	0.000388268	0.164266	0.251314	PI3K-AKT-mTOR inhibitor
ALVOCIDIB	-0.340907	1.16334e-05	0.429423	0.0053303	CDK inhibitor
AZ960	-0.33494	0.00334119	-0.40936	0.00209365	JAK inhibitor
LY2109761	-0.334103	0.00073201	0.13384	0.0149838	TGF beta receptor inhibitor
LINSITINIB	-0.32975	6.51963e-05	-0.0752699	0.19053	IGF-1 inhibitor
PHA-793887	-0.320201	0.000337676	0.288278	0.0984877	CDK inhibitor
MITOXANTRONE	-0.319972	0.00189557	0.220088	0.153248	DNA damaging agent
TASELISIB	-0.319393	0.00631485	-0.0625454	0.800541	PI3K-AKT-mTOR inhibitor
METHOTREXATE	-0.317758	2.31774e-05	-0.312223	0.0147822	dihydrofolate reductase inhibitor
ENTINOSTAT	-0.316173	0.00247214	-0.0449879	0.650621	HDAC inhibitor
PHENFORMIN	-0.315073	0.000419732	-0.0209511	0.430507	AMPK activator
OSIMERTINIB	-0.312343	0.000850606	-0.207123	0.0120877	EGFR inhibitor
I-BET-762	-0.309448	0.000134583	-0.287526	0.000529103	bromodomain inhibitor
BVD-523	-0.305935	0.00371277	0.0447872	0.930848	MAP kinase inhibitor
IMATINIB	-0.301239	0.00836405	0.16537	0.0205598	Bcr-Abl kinase inhibitor, KIT inhibitor, PDGFR tyrosine kinase receptor inhibitor
PEMETREXED	-0.301101	4.00302e-05	0.103646	0.155768	dihydrofolate reductase inhibitor, thymidylate synthase inhibitor
CP-724714	-0.297813	0.000267362	-0.0922319	0.0508019	EGFR inhibitor, protein tyrosine kinase inhibitor
PRT062607	-0.29104	0.00614633	-0.0439543	0.292006	syk inhibitor
VE-822	-0.289187	0.0059633	-0.0999517	0.269834	ATR kinase inhibitor
BELINOSTAT	-0.288805	0.000105997	-0.269042	0.0870122	HDAC inhibitor
AR-42	-0.286838	0.000338872	0.121631	0.519923	HDAC inhibitor
MASITINIB	-0.286378	0.00117092	0.0149987	0.347625	Kinase inhibitor
TG-101348	-0.28616	0.00171472	-0.141811	0.00679353	FLT3 inhibitor, JAK inhibitor
NINTEDANIB	-0.281636	0.00504293	-0.0910646	0.116172	Kinase inhibitor
OSI-027	-0.279576	0.00800759	0.0879591	0.153524	PI3K-AKT-mTOR inhibitor
TOPOTECAN	-0.264054	0.00961429	0.169491	0.23514	DNA damaging agent
APABETALONE	-0.262266	0.0264857	-0.126205	0.00952936	apolipoprotein expression enhancer
OSI-930	-0.25941	0.000682368	-0.0272017	0.823643	Kinase inhibitor
OLAPARIB	-0.25785	0.00352985	-0.232605	0.00284082	PARP inhibitor
PACLITAXEL	-0.255722	0.0149974	0.22665	0.198859	tubulin polymerization inhibitor
SNX-2112	-0.255597	0.00635611	0.244747	0.0684135	HSP inhibitor
TPCA-1	-0.255044	0.00237468	-0.13804	0.0195796	IKK inhibitor
ZIBOTENTAN	-0.254955	0.00360093	0.00159293	0.89229	endothelin receptor antagonist
FORETINIB	-0.248641	0.00475198	-0.0197412	0.79298	Kinase inhibitor
EX-527	-0.242763	0.0052929	0.0456323	0.168727	SIRT inhibitor
AT7867	-0.239822	0.00386841	-0.138912	0.132846	PI3K-AKT-mTOR inhibitor
WYE-125132	-0.234807	0.0221003	0.215866	0.142926	PI3K-AKT-mTOR inhibitor
UNC0642	-0.234333	0.00063348	0.0750531	0.276647	histone lysine methyltransferase inhibitor
CUDC-101	-0.231547	0.00457332	-0.358715	0.0169088	EGFR inhibitor
RUXOLITINIB	-0.224451	0.00025787	0.0552002	0.335904	JAK inhibitor
PI-103	-0.223251	0.0274195	0.0478267	0.753325	PI3K-AKT-mTOR inhibitor
VX-702	-0.2225	0.00649312	-0.0741045	0.228159	p38 MAPK inhibitor
IBRUTINIB	-0.221796	0.0229912	0.0385988	0.99075	Kinase inhibitor
CZC24832	-0.215418	0.0523314	0.0483627	0.305122	PI3K-AKT-mTOR inhibitor
NILOTINIB	-0.214582	0.000407492	0.00203693	0.909033	Kinase inhibitor
PIK-93	-0.209468	0.0220913	0.0338561	0.488422	PI3K-AKT-mTOR inhibitor
CPI-613	-0.203108	0.00496482	0.0420347	0.221099	pyruvate dehydrogenase inhibitor
GSK429286A	-0.202526	0.0245427	0.0232089	0.886153	rho associated kinase inhibitor
FR-180204	-0.194781	0.0473407	-0.0671799	0.276566	MAP kinase inhibitor
FLUDARABINE	-0.194191	0.00581455	-0.0179186	0.928614	ribonucleotide reductase inhibitor
VINORELBINE	-0.190301	0.0695355	0.0648988	0.803833	tubulin polymerization inhibitor
WZ4003	-0.190134	0.176456	-0.0159072	0.740385	AMPK inhibitor
TAMOXIFEN	-0.188966	0.0198683	-0.0381548	0.530657	estrogen receptor antagonist, selective estrogen receptor modulator (SERM)
PEVONEDISTAT	-0.1886	0.127151	0.162291	0.271162	nedd activating enzyme inhibitor
MK-2206	-0.186595	0.029991	-0.207031	0.0634578	PI3K-AKT-mTOR inhibitor
OTX015	-0.18456	0.18262	-0.171986	0.0870114	bromodomain inhibitor
GSK1904529A	-0.181454	0.0386368	-0.10747	0.187559	IGF-1 inhibitor, insulin growth factor receptor inhibitor, insulin receptor ligand
TEMOZOLOMIDE	-0.176376	0.0014389	0.118538	0.0138528	DNA damaging agent
VOXTALISIB	-0.175525	0.0698109	0.150369	0.0254934	PI3K-AKT-mTOR inhibitor
DACINOSTAT	-0.174594	0.0518074	0.35994	0.0124778	HDAC inhibitor
STF-62247	-0.169124	0.00870164	0.0827475	0.191829	autophagy inducer
GSK2126458	-0.165317	0.228346	0.343109	0.0224293	PI3K-AKT-mTOR inhibitor
TENOVIN-6	-0.15881	0.138583	-0.161163	0.154854	SIRT inhibitor
WNT-C59	-0.157115	0.0831506	-0.00818447	0.829811	porcupine inhibitor
SB-590885	-0.157113	0.00574293	-0.0107186	0.722552	RAF inhibitor
VISMODEGIB	-0.15565	0.123199	-0.0423037	0.147869	hedgehog pathway inhibitor, smoothened receptor antagonist
Y-39983	-0.149495	0.0548189	0.00432483	0.853754	rho associated kinase inhibitor
UNC1215	-0.140686	0.0439961	0.00722923	0.955036	L3MBTL antagonist
CISPLATIN	-0.135743	0.148512	0.110431	0.00846113	DNA damaging agent
BAM7	-0.13459	0.125314	0.102267	0.0529729	BAX activator
ZM-447439	-0.134247	0.192967	-0.199749	0.107367	Aurora kinase inhibitor
NVP-BHG712	-0.13268	0.0633451	-0.133001	0.0627657	ephrin inhibitor
TALAZOPARIB	-0.132515	0.463354	-0.206861	0.0722601	PARP inhibitor
LAPATINIB	-0.132054	0.541986	-0.11586	0.0426427	EGFR inhibitor
LINIFANIB	-0.130471	0.0428302	-0.087273	0.478851	Kinase inhibitor
UNC0638	-0.129964	0.0985055	0.0531465	0.257759	histone lysine methyltransferase inhibitor
PF-4708671	-0.123497	0.209814	-0.0340637	0.294609	ribosomal protein inhibitor
TIVOZANIB	-0.119462	0.0170081	-0.0163659	0.831276	Kinase inhibitor
AT-7519	-0.110563	0.254364	0.334304	0.0607809	CDK inhibitor
AZD8055	-0.109974	0.118238	0.317271	0.0385484	PI3K-AKT-mTOR inhibitor
CANERTINIB	-0.103276	0.347235	0.0190299	0.975485	EGFR inhibitor
SIROLIMUS	-0.0994499	0.445002	-0.026103	0.716094	PI3K-AKT-mTOR inhibitor
VELIPARIB	-0.0925564	0.503931	0.00449306	0.923789	PARP inhibitor
BICALUTAMIDE	-0.0920322	0.145524	0.0147759	0.713516	androgen receptor antagonist
ALECTINIB	-0.0898615	0.102724	-0.035274	0.375834	ALK tyrosine kinase receptor inhibitor
CYTARABINE	-0.0878923	0.232655	0.105057	0.00689102	ribonucleotide reductase inhibitor
DACOMITINIB	-0.0827448	0.463886	-0.151275	0.116683	EGFR inhibitor
ZSTK-474	-0.0821757	0.633889	0.0254109	0.456595	PI3K-AKT-mTOR inhibitor
TOZASERTIB	-0.0803637	0.758966	-0.0901356	0.331631	Aurora kinase inhibitor, Bcr-Abl kinase inhibitor, FLT3 inhibitor, JAK inhibitor
PAC-1	-0.0782801	0.385591	-0.0765507	0.350973	caspase activator
VINBLASTINE	-0.070915	0.450216	-0.0321751	0.832667	microtubule inhibitor, tubulin polymerization inhibitor
BMS-754807	-0.0653527	0.491749	-0.180884	0.251055	IGF-1 inhibitor
ROSCOVITINE	-0.0629065	0.718599	0.0118819	0.757344	CDK inhibitor
LCL-161	-0.0530795	0.424044	0.11176	0.0765281	XIAP inhibitor
GEMCITABINE	-0.053067	0.713524	0.0451074	0.93992	ribonucleotide reductase inhibitor
CABOZANTINIB	-0.0508585	0.483237	0.0256745	0.573013	RET tyrosine kinase inhibitor, VEGFR inhibitor
PHA-665752	-0.0433656	0.104731	0.031233	0.657165	c-Met inhibitor
AVAGACESTAT	-0.0433015	0.390077	0.0493435	0.400535	gamma secretase inhibitor
PYRIMETHAMINE	-0.0395214	0.687296	-0.122978	0.227366	dihydrofolate reductase inhibitor
RUCAPARIB	-0.0366989	0.861687	-0.0658876	0.213997	PARP inhibitor
TWS-119	-0.0366329	0.974309	-0.00916906	0.806552	glycogen synthase kinase inhibitor
SALUBRINAL	-0.0268756	0.924097	-0.0747101	0.149047	eukaryotic translation initiation factor inhibitor
LENALIDOMIDE	-0.0216297	0.630437	-0.0262352	0.708639	anticancer agent
PALBOCICLIB	-0.0207907	0.963809	-0.0358525	0.916565	CDK inhibitor
DORAMAPIMOD	-0.0197174	0.936718	0.0655376	0.0771176	p38 MAPK inhibitor
SN-38	-0.0146363	0.940024	0.196363	0.205015	DNA damaging agent
GSK650394	-0.00981884	0.940127	-0.0609431	0.226153	serum/glucocorticoid regulated kinase inhibitor
BI-2536	-0.00177426	0.975106	-0.332908	0.027805	PLK inhibitor
MITOMYCIN-C	0.00719607	0.694774	-0.0152857	0.856948	DNA damaging agent
LESTAURTINIB	0.00977217	0.931107	0.084223	0.587987	FLT3 inhibitor, growth factor receptor inhibitor, JAK inhibitor
AZD7762	0.0208407	0.582185	0.323707	0.0861404	CHK inhibitor
GS-9973	0.0265259	0.482216	0.0202775	0.380989	syk inhibitor
ETOPOSIDE	0.0328412	0.70193	-0.0116331	0.880089	DNA damaging agent
DOCETAXEL	0.0331845	0.749889	0.264667	0.113309	tubulin polymerization inhibitor
ERLOTINIB	0.0390064	0.674422	0.127113	0.306193	EGFR inhibitor
ENZASTAURIN	0.0425333	0.591365	-0.0250941	0.866296	PKC inhibitor
PARTHENOLIDE	0.0427663	0.786668	0.0228357	0.616636	NFkB pathway inhibitor
PELITINIB	0.0435903	0.589918	0.220528	0.115638	EGFR inhibitor
GEFITINIB	0.0468458	0.992076	-0.00990426	0.433074	EGFR inhibitor
SB-216763	0.0529264	0.969422	-0.0274549	0.954333	glycogen synthase kinase inhibitor
GDC-0941	0.0548544	0.410881	-0.0923219	0.301115	PI3K-AKT-mTOR inhibitor
PONATINIB	0.0629058	0.308153	0.238962	0.0483365	Bcr-Abl kinase inhibitor, FLT3 inhibitor, PDGFR tyrosine kinase receptor inhibitor
IOX2	0.0674784	0.753894	-0.0526965	0.288685	hypoxia inducible factor inhibitor
AR-12	0.0675331	0.376022	-0.0515997	0.846503	phosphoinositide dependent kinase inhibitor
BORTEZOMIB	0.068149	0.0179889	0.248284	0.104217	NFkB pathway inhibitor, proteasome inhibitor
IDELALISIB	0.0701828	0.200863	0.00491099	0.887226	PI3K-AKT-mTOR inhibitor
OBATOCLAX	0.0712459	0.395909	0.184128	0.136413	BCL inhibitor
AFATINIB	0.0721626	0.515052	-0.234622	0.00477538	EGFR inhibitor
PAZOPANIB	0.07374	0.247268	-0.00162616	0.806348	KIT inhibitor, PDGFR tyrosine kinase receptor inhibitor, VEGFR inhibitor
KU-55933	0.0742022	0.448154	0.0668302	0.126705	ATM kinase inhibitor
AZD8931	0.0919016	0.151199	-0.0583863	0.312091	EGFR inhibitor
MOTESANIB	0.0922733	0.466733	0.119611	0.00265916	KIT inhibitor, PDGFR tyrosine kinase receptor inhibitor, VEGFR inhibitor
NVP-BEZ235	0.0924119	0.177276	0.18127	0.119779	PI3K-AKT-mTOR inhibitor
PF-562271	0.105842	0.231781	-0.182033	0.286803	focal adhesion kinase inhibitor
GNF-2	0.11158	0.614472	-0.0507963	0.137031	Bcr-Abl kinase inhibitor
DABRAFENIB	0.114615	0.625384	0.280808	0.00891006	RAF inhibitor
SUNITINIB	0.120161	0.284263	-0.0232905	0.722971	FLT3 inhibitor, KIT inhibitor, PDGFR tyrosine kinase receptor inhibitor, RET tyrosine kinase inhibitor, VEGFR inhibitor
NVP-TAE684	0.138387	0.289959	-0.128267	0.462994	ALK tyrosine kinase receptor inhibitor
PLX-4720	0.14477	0.146346	0.145538	0.0949459	RAF inhibitor
JNJ-38877605	0.151703	0.115778	0.00395213	0.45165	tyrosine kinase inhibitor
LFM-A13	0.155777	0.0690413	-0.104946	0.0745873	Kinase inhibitor
DOXORUBICIN	0.160646	0.1744	0.534496	0.00214031	DNA damaging agent
CCT018159	0.161021	0.120367	-0.0837902	0.111888	HSP inhibitor
YM-155	0.168707	0.379639	0.31984	0.0301549	survivin inhibitor
TIPIFARNIB	0.172381	0.0594182	-0.0954817	0.642332	farnesyltransferase inhibitor
XAV-939	0.20012	0.0606285	0.120194	0.0155375	tankyrase inhibitor
AST-1306	0.221167	0.0224674	-0.0812609	0.501041	EGFR inhibitor
BEXAROTENE	0.236614	0.0204265	-0.00207727	0.830547	retinoid receptor agonist
TW-37	0.248819	0.148223	-0.196744	0.210282	BCL inhibitor
PFI-1	0.259468	0.0133972	-0.333717	0.00231113	bromodomain inhibitor
BOSUTINIB	0.294491	0.00434103	0.023271	0.904325	Kinase inhibitor
ELESCLOMOL	0.299817	0.00455799	0.120321	0.24091	oxidative stress inducer
PD-0325901	0.344343	1.74979e-06	0.468782	0.00137633	MEK inhibitor
MIDOSTAURIN	0.348632	0.000663126	0.373842	0.00968623	Kinase inhibitor
AZD6482	0.354052	2.14386e-05	0.0561213	0.392675	PI3K-AKT-mTOR inhibitor
CHIR-99021	0.365834	8.16335e-06	0.058995	0.133774	glycogen synthase kinase inhibitor
MG-132	0.373323	0.0203047	0.18789	0.204514	proteasome inhibitor
PD-184352	0.38345	1.44014e-05	0.0652539	0.637596	MEK inhibitor
TEMSIROLIMUS	0.39712	1.37936e-05	-0.0885836	0.370013	PI3K-AKT-mTOR inhibitor
TRAMETINIB	0.411312	8.70611e-09	0.461354	0.000882016	MEK inhibitor
TANESPIMYCIN	0.424837	1.85802e-05	0.19308	0.220369	HSP inhibitor
EMBELIN	0.425323	0.000289289	-0.0554669	0.227499	HCV inhibitor, XIAP inhibitor
SERDEMETAN	0.429461	1.33789e-05	-0.0398951	0.825103	MDM inhibitor
AZ-628	0.452777	0.00323375	0.049564	0.978827	RAF inhibitor
SARACATINIB	0.458439	0.00924296	0.119157	0.277216	src inhibitor
SELUMETINIB	0.513881	1.13002e-10	0.213395	0.0722081	MEK inhibitor
REFAMETINIB	0.555838	2.2666e-11	0.180804	0.0504983	MEK inhibitor
DASATINIB	0.603483	3.2373e-12	0.568841	3.04948e-06	Bcr-Abl kinase inhibitor, ephrin inhibitor, KIT inhibitor, PDGFR tyrosine kinase receptor inhibitor, src inhibitor, tyrosine kinase inhibitor
TGX-221	0.635768	0.00238806	0.151929	0.00265042	PI3K-AKT-mTOR inhibitor
